# Supplementary material for: CHD3 and CHD4 coordinate gene expression programs to maintain β-cell function and identity in vivo
Source: Research Square preprint supplement (doi:10.21203/rs.3.rs-7880472/v1), 2025-11-07
Supplement: Supplementary file 1 [file 0ea268c60ba8843900785bcd.xlsx]

## Sheet: Chd3Db_Entire Gene list
feature_id	geneId	full_name	logFcValue	logProbValue
ENSMUSG00000026818	Cel	carboxyl ester lipase	-28.293	1.88035e-13
ENSMUSG00000047517	Dmbt1	deleted in malignant brain tumors 1	-25.3031	7.98656e-11
ENSMUSG00000049350	Zg16	zymogen granule protein 16	-24.41	8.85967e-11
ENSMUSG00000023140	Reg2	regenerating islet-derived 2	-24.1943	6.19212e-10
ENSMUSG00000040205	Cuzd1	CUB and zona pellucida-like domains 1	-23.1593	3.883e-09
ENSMUSG00000025091	Pnliprp2	pancreatic lipase-related protein 2	-22.5482	1.06276e-08
ENSMUSG00000024028	Tff2	trefoil factor 2 (spasmolytic protein 1)	-22.0178	2.57752e-08
ENSMUSG00000034139	Serpini2	serine (or cysteine) peptidase inhibitor, clade I, member 2	-21.9497	2.89424e-08
ENSMUSG00000068341	Reg3d	regenerating islet-derived 3 delta	-21.2454	8.95466e-08
ENSMUSG00000030219	Erp27	endoplasmic reticulum protein 27	-20.5934	3.06425e-08
ENSMUSG00000071519	Prss3	protease, serine 3	-20.5322	3.56766e-08
ENSMUSG00000071356	Reg3b	regenerating islet-derived 3 beta	-19.7462	3.85454e-07
ENSMUSG00000011463	Cpb1	carboxypeptidase B1 (tissue)	-13.6931	2.70692e-05
ENSMUSG00000070360	Amy2a1	amylase 2a1	-12.1285	0.000204869
ENSMUSG00000054446	Cpa1	carboxypeptidase A1, pancreatic	-11.9402	6.42721e-05
ENSMUSG00000030954	Gp2	glycoprotein 2 (zymogen granule membrane)	-11.4825	0.00347232
ENSMUSG00000031957	Ctrb1	chymotrypsinogen B1	-11.4768	0.00255305
ENSMUSG00000059654	Reg1	regenerating islet-derived 1	-11.3141	0.00333401
ENSMUSG00000058579	Cela2a	chymotrypsin-like elastase family, member 2A	-10.3665	0.000129281
ENSMUSG00000031896	Ctrl	chymotrypsin-like	-9.51995	0.00174013
ENSMUSG00000083079	Amy2b	amylase 2b	-9.41655	0.0060172
ENSMUSG00000046008	Pnlip	pancreatic lipase	-9.33426	0.000640405
ENSMUSG00000057163	Prss2	protease, serine 2	-9.29255	0.00518265
ENSMUSG00000042179	Pnliprp1	pancreatic lipase related protein 1	-9.22294	0.00307411
ENSMUSG00000029882	2210010C04Rik	RIKEN cDNA 2210010C04 gene	-9.03251	0.0294778
ENSMUSG00000054106	Try4	trypsin 4	-9.0027	0.001299
ENSMUSG00000023433	Cela3b	chymotrypsin-like elastase family, member 3B	-8.99206	0.00576773
ENSMUSG00000109209	Gm45104	predicted gene 45104	-8.93043	0.00132231
ENSMUSG00000024225	Clps	colipase, pancreatic	-8.86477	0.000296262
ENSMUSG00000064358	mt-Co3	mitochondrially encoded cytochrome c oxidase III	-8.26875	6.23863e-07
ENSMUSG00000114985	1810028F09Rik	RIKEN cDNA 1810028F09 gene	-8.21192	0.0398575
ENSMUSG00000064357	mt-Atp6	mitochondrially encoded ATP synthase 6	-8.15812	4.72511e-07
ENSMUSG00000049723	Mmp12	matrix metallopeptidase 12	-8.08476	0.00253107
ENSMUSG00000035896	Rnase1	ribonuclease, RNase A family, 1 (pancreatic)	-8.01256	0.0004221
ENSMUSG00000084174	Sycn	syncollin	-7.55723	0.108377
ENSMUSG00000029522	Pla2g1b	phospholipase A2, group IB, pancreas	-7.46922	0.0481212
ENSMUSG00000063903	Klk1	kallikrein 1	-7.11206	0.135043
ENSMUSG00000064354	mt-Co2	mitochondrially encoded cytochrome c oxidase II	-7.10019	2.26598e-05
ENSMUSG00000005220	Corin	corin, serine peptidase	-7.0165	0.000823609
ENSMUSG00000024184	Pdia2	protein disulfide isomerase associated 2	-6.93995	0.146537
ENSMUSG00000024503	Spink1	serine peptidase inhibitor, Kazal type 1	-6.90497	0.172646
ENSMUSG00000052160	Pld4	phospholipase D family, member 4	-6.43858	0.00424109
ENSMUSG00000048498	Cd300e	CD300E molecule	-6.35409	0.0307047
ENSMUSG00000026432	Avpr1b	arginine vasopressin receptor 1B	-6.28206	0.0472478
ENSMUSG00000074264	Amy1	amylase 1, salivary	-6.26292	0.107074
ENSMUSG00000038768	9130409I23Rik	RIKEN cDNA 9130409I23 gene	-6.22428	0.00736622
ENSMUSG00000012819	Cdh23	cadherin 23 (otocadherin)	-6.19366	0.0478002
ENSMUSG00000060988	Galnt13	polypeptide N-acetylgalactosaminyltransferase 13	-6.10795	0.118405
ENSMUSG00000046192	Iqub	IQ motif and ubiquitin domain containing	-6.10649	0.0452309
ENSMUSG00000043673	Kcns3	potassium voltage-gated channel, delayed-rectifier, subfamily S, member 3	-6.08824	0.120272
ENSMUSG00000071470	Ccnb1ip1	cyclin B1 interacting protein 1	-6.08748	0.126734
ENSMUSG00000038775	Vill	villin-like	-6.08452	0.0471635
ENSMUSG00000003283	Hck	hemopoietic cell kinase	-6.06925	0.0471049
ENSMUSG00000039376	Synpo2l	synaptopodin 2-like	-5.8816	0.066812
ENSMUSG00000094594	Tpd52-ps	tumor protein D52, pseudogene	-5.87052	0.000990484
ENSMUSG00000036938	Try5	trypsin 5	-5.83336	0.0299789
ENSMUSG00000081251	Gm12164	predicted gene 12164	-5.80644	0.00026669
ENSMUSG00000114622	Gm18990	predicted gene, 18990	-5.78582	0.070509
ENSMUSG00000029193	Cckar	cholecystokinin A receptor	-5.77157	0.280685
ENSMUSG00000006204	Cdcp3	CUB domain containing protein 3	-5.75058	0.164705
ENSMUSG00000001870	Ltbp1	latent transforming growth factor beta binding protein 1	-5.74577	0.165305
ENSMUSG00000024300	Myo1f	myosin IF	-5.73384	0.0781011
ENSMUSG00000109372	Gm19410	predicted gene, 19410	-5.70673	0.287564
ENSMUSG00000015224	Cyp2j9	cytochrome P450, family 2, subfamily j, polypeptide 9	-5.6827	0.000820456
ENSMUSG00000043461	Sptssb	serine palmitoyltransferase, small subunit B	-5.67611	0.0862317
ENSMUSG00000045091	Aqp12	aquaporin 12	-5.65964	0.293021
ENSMUSG00000081788	Gm5898	predicted gene 5898	-5.64327	0.00224954
ENSMUSG00000048865	Arhgap30	Rho GTPase activating protein 30	-5.62712	0.106303
ENSMUSG00000084260	Gm12844	predicted gene 12844	-5.59237	0.00353829
ENSMUSG00000117484	Gm5500	predicted pseudogene 5500	-5.58243	0.00291007
ENSMUSG00000083367	Gm8806	predicted gene 8806	-5.56555	0.00263984
ENSMUSG00000074268	Amy2a5	amylase 2a5	-5.48675	0.312962
ENSMUSG00000120274	ENSMUSG00000120274	novel transcript	-5.47527	0.0049014
ENSMUSG00000043410	Hfm1	HFM1, ATP-dependent DNA helicase homolog	-5.46952	0.0547489
ENSMUSG00000053198	Prx	periaxin	-5.45627	0.220276
ENSMUSG00000031910	Has3	hyaluronan synthase 3	-5.44851	0.213966
ENSMUSG00000053199	Arhgap20	Rho GTPase activating protein 20	-5.41767	0.321105
ENSMUSG00000067736	Gm10222	predicted gene 10222	-5.40882	0.00724643
ENSMUSG00000082884	Gm13339	predicted gene 13339	-5.39471	0.00576841
ENSMUSG00000040498	Igsf23	immunoglobulin superfamily, member 23	-5.39366	0.125321
ENSMUSG00000006386	Tek	TEK receptor tyrosine kinase	-5.37281	0.241689
ENSMUSG00000100303	2600014E21Rik	RIKEN cDNA 2600014E21 gene	-5.35193	0.027103
ENSMUSG00000027978	Prss12	protease, serine 12 neurotrypsin (motopsin)	-5.33988	0.059609
ENSMUSG00000105445	Gm42972	predicted gene 42972	-5.32133	0.236902
ENSMUSG00000079516	Reg3a	regenerating islet-derived 3 alpha	-5.32004	0.332892
ENSMUSG00000036192	Rorb	RAR-related orphan receptor beta	-5.31942	0.250763
ENSMUSG00000073418	C4b	complement component 4B (Chido blood group)	-5.31618	0.272189
ENSMUSG00000021294	Kif26a	kinesin family member 26A	-5.29778	0.24197
ENSMUSG00000023031	Cela1	chymotrypsin-like elastase family, member 1	-5.29549	0.0231124
ENSMUSG00000061186	Sfmbt2	Scm-like with four mbt domains 2	-5.29468	0.33609
ENSMUSG00000055026	Gabrg3	gamma-aminobutyric acid (GABA) A receptor, subunit gamma 3	-5.28873	0.0706654
ENSMUSG00000041378	Cldn5	claudin 5	-5.28473	0.0652263
ENSMUSG00000099342	Gm18180	predicted gene, 18180	-5.26523	0.15325
ENSMUSG00000031162	Gata1	GATA binding protein 1	-5.26222	0.339858
ENSMUSG00000032380	Dapk2	death-associated protein kinase 2	-5.26059	0.135325
ENSMUSG00000030806	Stx1b	syntaxin 1B	-5.25859	0.247229
ENSMUSG00000053550	Shisa7	shisa family member 7	-5.23389	0.136923
ENSMUSG00000064310	Zpld1	zona pellucida like domain containing 1	-5.2319	0.252347
ENSMUSG00000050824	Sstr5	somatostatin receptor 5	-5.22886	0.34291
ENSMUSG00000048304	Slitrk3	SLIT and NTRK-like family, member 3	-5.22457	0.254648
ENSMUSG00000073529	F830208F22Rik	RIKEN cDNA F830208F22 gene	-5.2144	0.142849
ENSMUSG00000116811	Gm16385	predicted gene 16385	-5.20872	0.0107566
ENSMUSG00000026405	C4bp	complement component 4 binding protein	-5.20025	0.259582
ENSMUSG00000102448	Gm37101	predicted gene, 37101	-5.19842	0.256773
ENSMUSG00000037731	Themis2	thymocyte selection associated family member 2	-5.19625	0.139767
ENSMUSG00000050747	Trim15	tripartite motif-containing 15	-5.19075	0.0600593
ENSMUSG00000050108	Bpifc	BPI fold containing family C	-5.18439	0.265532
ENSMUSG00000105584	Gm42588	predicted gene 42588	-5.18157	0.264968
ENSMUSG00000072618	Gm10384	predicted gene 10384	-5.16497	0.266581
ENSMUSG00000028763	Hspg2	perlecan (heparan sulfate proteoglycan 2)	-5.09964	0.30124
ENSMUSG00000071550	Cfap44	cilia and flagella associated protein 44	-5.08176	1
ENSMUSG00000083097	Gm14494	predicted gene 14494	-5.08077	1
ENSMUSG00000027068	Dhrs9	dehydrogenase/reductase (SDR family) member 9	-5.06082	1
ENSMUSG00000039617	Gm7488	predicted gene 7488	-5.04048	1
ENSMUSG00000083626	Gm4459	predicted gene 4459	-5.0334	0.00392199
ENSMUSG00000035783	Acta2	actin alpha 2, smooth muscle, aorta	-5.01825	1
ENSMUSG00000024388	Myo7b	myosin VIIB	-5.00897	1
ENSMUSG00000107512	Gm44433	predicted gene, 44433	-5.00545	1
ENSMUSG00000058119	Gm5771	predicted gene 5771	-4.99059	1
ENSMUSG00000021922	Itih4	inter alpha-trypsin inhibitor, heavy chain 4	-4.99059	1
ENSMUSG00000002699	Lcp2	lymphocyte cytosolic protein 2	-4.99059	1
ENSMUSG00000045498	Pcdhb3	protocadherin beta 3	-4.96144	1
ENSMUSG00000115062	4930544F09Rik	RIKEN cDNA 4930544F09 gene	-4.95408	1
ENSMUSG00000021806	Nid2	nidogen 2	-4.95053	1
ENSMUSG00000032105	Pdzd3	PDZ domain containing 3	-4.94957	1
ENSMUSG00000061728	Btnl7-ps	butyrophilin-like 7, pseudogene	-4.94818	1
ENSMUSG00000105202	C230031I18Rik	RIKEN cDNA C230031I18 gene	-4.91247	1
ENSMUSG00000115868	Gm2999	predicted gene 2999	-4.90713	1
ENSMUSG00000121027	ENSMUSG00000121027	novel transcript	-4.90515	1
ENSMUSG00000023349	Clec4n	C-type lectin domain family 4, member n	-4.90014	1
ENSMUSG00000031298	Adgrg2	adhesion G protein-coupled receptor G2	-4.88977	1
ENSMUSG00000020218	Wif1	Wnt inhibitory factor 1	-4.88808	1
ENSMUSG00000036872	Abcc12	ATP-binding cassette, sub-family C (CFTR/MRP), member 12	-4.88413	1
ENSMUSG00000046318	Ccbe1	collagen and calcium binding EGF domains 1	-4.87422	1
ENSMUSG00000053153	Spag16	sperm associated antigen 16	-4.87095	1
ENSMUSG00000096971	4930556M19Rik	RIKEN cDNA 4930556M19 gene	-4.86958	1
ENSMUSG00000109157	Gm44829	predicted gene 44829	-4.8535	1
ENSMUSG00000043168	4930426D05Rik	RIKEN cDNA 4930426D05 gene	-4.85338	1
ENSMUSG00000054409	Tmem74	transmembrane protein 74	-4.83209	1
ENSMUSG00000034796	Cpne7	copine VII	-4.83004	1
ENSMUSG00000020651	Slc26a4	solute carrier family 26, member 4	-4.82632	1
ENSMUSG00000109882	Gm18706	predicted gene, 18706	-4.82618	1
ENSMUSG00000083892	Gm1848	predicted gene 1848	-4.81357	1
ENSMUSG00000107128	Gm42867	predicted gene 42867	-4.80826	1
ENSMUSG00000102543	Pcdhgc5	protocadherin gamma subfamily C, 5	-4.79347	1
ENSMUSG00000116655	Gm35455	predicted gene, 35455	-4.78568	1
ENSMUSG00000057000	Nxf3	nuclear RNA export factor 3	-4.77506	1
ENSMUSG00000025877	Hk3	hexokinase 3	-4.77137	1
ENSMUSG00000075478	Slitrk1	SLIT and NTRK-like family, member 1	-4.75242	1
ENSMUSG00000022150	Dab2	disabled 2, mitogen-responsive phosphoprotein	-4.74385	1
ENSMUSG00000038745	Nlrp6	NLR family, pyrin domain containing 6	-4.74385	1
ENSMUSG00000084111	Gm15710	predicted gene 15710	-4.74045	0.011625
ENSMUSG00000079428	Tceal7	transcription elongation factor A (SII)-like 7	-4.73693	1
ENSMUSG00000083283	Gm15361	predicted pseudogene 15361	-4.71784	0.0105774
ENSMUSG00000038068	Rnf144b	ring finger protein 144B	-4.70892	1
ENSMUSG00000004633	Chn2	chimerin 2	-4.70842	1
ENSMUSG00000071715	Ncf4	neutrophil cytosolic factor 4	-4.6983	1
ENSMUSG00000025432	Avil	advillin	-4.69493	0.0052742
ENSMUSG00000113860	Gm45949	predicted gene, 45949	-4.6931	1
ENSMUSG00000057173	Rfx8	regulatory factor X 8	-4.69241	0.03529
ENSMUSG00000052133	Sema5b	sema domain, seven thrombospondin repeats (type 1 and type 1-like), transmembrane domain (TM) and short cytoplasmic domain, (semaphorin) 5B	-4.68978	1
ENSMUSG00000037005	Xpnpep2	X-prolyl aminopeptidase (aminopeptidase P) 2, membrane-bound	-4.6862	1
ENSMUSG00000086851	A430108G06Rik	RIKEN cDNA A430108G06 gene	-4.68384	1
ENSMUSG00000030772	Dkk3	dickkopf WNT signaling pathway inhibitor 3	-4.68029	1
ENSMUSG00000027584	Oprl1	opioid receptor-like 1	-4.67053	1
ENSMUSG00000113431	Gm6722	predicted gene 6722	-4.66939	0.0138508
ENSMUSG00000111417	Gm47430	predicted gene, 47430	-4.66913	1
ENSMUSG00000107427	Gm43948	predicted gene, 43948	-4.66877	0.130465
ENSMUSG00000052496	Pkdrej	polycystin (PKD) family receptor for egg jelly	-4.65992	1
ENSMUSG00000102581	Gm37443	predicted gene, 37443	-4.65022	1
ENSMUSG00000103986	Gm5539	predicted gene 5539	-4.64878	1
ENSMUSG00000107634	Gm36816	predicted gene, 36816	-4.64133	1
ENSMUSG00000003882	Il7r	interleukin 7 receptor	-4.6397	1
ENSMUSG00000108372	Gm45124	predicted gene 45124	-4.63297	0.241689
ENSMUSG00000112922	Gm47572	predicted gene, 47572	-4.62653	1
ENSMUSG00000083420	Gm15665	predicted gene 15665	-4.61693	1
ENSMUSG00000093668	Pou5f2	POU domain class 5, transcription factor 2	-4.61254	1
ENSMUSG00000024713	Pcsk5	proprotein convertase subtilisin/kexin type 5	-4.61186	1
ENSMUSG00000045733	Sprn	shadow of prion protein	-4.61186	1
ENSMUSG00000064177	Ghrl	ghrelin	-4.61029	1
ENSMUSG00000024620	Pdgfrb	platelet derived growth factor receptor, beta polypeptide	-4.60921	1
ENSMUSG00000074847	Gm10775	predicted gene 10775	-4.60703	1
ENSMUSG00000029716	Tfr2	transferrin receptor 2	-4.59808	1
ENSMUSG00000008590	Htr3b	5-hydroxytryptamine (serotonin) receptor 3B	-4.56326	1
ENSMUSG00000047394	Odf3b	outer dense fiber of sperm tails 3B	-4.55857	1
ENSMUSG00000102287	Gm37003	predicted gene, 37003	-4.54106	1
ENSMUSG00000039167	Adgrl4	adhesion G protein-coupled receptor L4	-4.53779	1
ENSMUSG00000103572	Gm37115	predicted gene, 37115	-4.53779	1
ENSMUSG00000108436	Gm44851	predicted gene 44851	-4.53122	1
ENSMUSG00000026785	Pkn3	protein kinase N3	-4.528	0.257893
ENSMUSG00000005947	Itgae	integrin alpha E, epithelial-associated	-4.52232	0.0554359
ENSMUSG00000025348	Itga7	integrin alpha 7	-4.51961	1
ENSMUSG00000120567	ENSMUSG00000120567	novel transcript	-4.51818	0.0443971
ENSMUSG00000040747	Cd53	CD53 antigen	-4.51636	1
ENSMUSG00000103132	Gm37978	predicted gene, 37978	-4.51603	1
ENSMUSG00000035314	Gdpd5	glycerophosphodiester phosphodiesterase domain containing 5	-4.51435	1
ENSMUSG00000017344	Vtn	vitronectin	-4.51226	1
ENSMUSG00000117414	Gm46587	predicted gene, 46587	-4.51091	1
ENSMUSG00000029664	Tfpi2	tissue factor pathway inhibitor 2	-4.5101	0.00392764
ENSMUSG00000083220	Gm12919	predicted gene 12919	-4.50476	1
ENSMUSG00000063314	Gm12657	predicted gene 12657	-4.49776	1
ENSMUSG00000096755	Ftl1-ps2	ferritin light polypeptide, pseudogene 2	-4.49727	1
ENSMUSG00000109314	Gm44699	predicted gene 44699	-4.49675	1
ENSMUSG00000035274	Tpbg	trophoblast glycoprotein	-4.49581	0.109139
ENSMUSG00000030762	Aqp8	aquaporin 8	-4.49555	1
ENSMUSG00000056073	Grik2	glutamate receptor, ionotropic, kainate 2 (beta 2)	-4.49205	1
ENSMUSG00000036553	Sh3tc1	SH3 domain and tetratricopeptide repeats 1	-4.49205	1
ENSMUSG00000001588	Acap1	ArfGAP with coiled-coil, ankyrin repeat and PH domains 1	-4.49197	1
ENSMUSG00000120984	ENSMUSG00000120984	novel transcript, antisense to Cavin1	-4.48104	1
ENSMUSG00000071521	Try10	trypsin 10	-4.47473	0.340975
ENSMUSG00000070166	Gm25821	predicted gene, 25821	-4.46528	0.0831194
ENSMUSG00000055134	9130017K11Rik	RIKEN cDNA 9130017K11 gene	-4.46488	1
ENSMUSG00000067813	Xkr9	X-linked Kx blood group related 9	-4.46488	1
ENSMUSG00000085051	Gm11542	predicted gene 11542	-4.45904	1
ENSMUSG00000102744	5830444F18Rik	RIKEN cDNA 5830444F18 gene	-4.4471	1
ENSMUSG00000035105	Egln3	egl-9 family hypoxia-inducible factor 3	-4.44181	1
ENSMUSG00000062980	Cped1	cadherin-like and PC-esterase domain containing 1	-4.41766	0.0281411
ENSMUSG00000102874	Gm37137	predicted gene, 37137	-4.4146	1
ENSMUSG00000085016	Gm11335	predicted gene 11335	-4.4138	0.0533809
ENSMUSG00000060429	Sntb1	syntrophin, basic 1	-4.41307	1
ENSMUSG00000107677	Or2ak4	olfactory receptor family 2 subfamily AK member 4	-4.41124	1
ENSMUSG00000081738	Hmgb1-ps2	high mobility group box 1, pseudogene 2	-4.41072	1
ENSMUSG00000104436	Gm37423	predicted gene, 37423	-4.40772	1
ENSMUSG00000024395	Lims2	LIM and senescent cell antigen like domains 2	-4.40722	1
ENSMUSG00000073490	Ifi207	interferon activated gene 207	-4.40527	1
ENSMUSG00000097825	9630001P10Rik	RIKEN cDNA 9630001P10 gene	-4.40342	1
ENSMUSG00000085914	Gm14320	predicted gene 14320	-4.40049	1
ENSMUSG00000084399	Gm15666	predicted gene 15666	-4.4002	1
ENSMUSG00000048215	A630023P12Rik	RIKEN cDNA A630023P12 gene	-4.39804	1
ENSMUSG00000030737	Slco2b1	solute carrier organic anion transporter family, member 2b1	-4.3976	1
ENSMUSG00000004707	Ly9	lymphocyte antigen 9	-4.39595	1
ENSMUSG00000055435	Maf	avian musculoaponeurotic fibrosarcoma oncogene homolog	-4.39595	1
ENSMUSG00000099398	Ms4a14	membrane-spanning 4-domains, subfamily A, member 14	-4.39595	1
ENSMUSG00000039316	Rftn1	raftlin lipid raft linker 1	-4.39595	1
ENSMUSG00000119004	Gm23264	predicted gene, 23264	-4.39449	1
ENSMUSG00000069223	4930451E10Rik	RIKEN cDNA 4930451E10 gene	-4.39425	1
ENSMUSG00000097613	Gm17597	predicted gene, 17597	-4.39086	1
ENSMUSG00000097307	Gm26834	predicted gene, 26834	-4.37762	1
ENSMUSG00000120080	ENSMUSG00000120080	novel transcript	-4.37609	1
ENSMUSG00000087008	Gm5530	predicted gene 5530	-4.37499	1
ENSMUSG00000098758	7630403G23Rik	RIKEN cDNA 7630403G23 gene	-4.37463	1
ENSMUSG00000099686	Gm29460	predicted gene 29460	-4.37387	1
ENSMUSG00000119286	Rnu5g	RNA, U5G small nuclear	-4.37185	1
ENSMUSG00000084946	Dlx1as	distal-less homeobox 1, antisense	-4.37061	1
ENSMUSG00000021070	Bdkrb2	bradykinin receptor, beta 2	-4.36882	1
ENSMUSG00000117448	Gm50055	predicted gene, 50055	-4.35723	1
ENSMUSG00000061048	Cdh3	cadherin 3	-4.35679	1
ENSMUSG00000029570	Lfng	LFNG O-fucosylpeptide 3-beta-N-acetylglucosaminyltransferase	-4.34865	1
ENSMUSG00000032854	Ugt8a	UDP galactosyltransferase 8A	-4.34865	1
ENSMUSG00000013523	Bcas1	brain enriched myelin associated protein 1	-4.34437	1
ENSMUSG00000108189	Gm43887	predicted gene, 43887	-4.34169	1
ENSMUSG00000026616	Cr2	complement receptor 2	-4.34002	1
ENSMUSG00000110529	Gm45694	predicted gene 45694	-4.33914	1
ENSMUSG00000100720	Gm10075	predicted gene 10075	-4.3371	1
ENSMUSG00000109998	Gm45437	predicted gene 45437	-4.33491	1
ENSMUSG00000030519	Apba2	amyloid beta (A4) precursor protein-binding, family A, member 2	-4.334	1
ENSMUSG00000114213	A430090L17Rik	RIKEN cDNA A430090L17 gene	-4.32777	0.105724
ENSMUSG00000031125	3830403N18Rik	RIKEN cDNA 3830403N18 gene	-4.32486	1
ENSMUSG00000075318	Scn2a	sodium channel, voltage-gated, type II, alpha	-4.32486	1
ENSMUSG00000097357	Gm16793	predicted gene, 16793	-4.31828	1
ENSMUSG00000074575	Kcng1	potassium voltage-gated channel, subfamily G, member 1	-4.31828	1
ENSMUSG00000110614	Gm45817	predicted gene 45817	-4.31816	1
ENSMUSG00000061356	Nuggc	nuclear GTPase, germinal center associated	-4.31618	0.122017
ENSMUSG00000112193	Gm48206	predicted gene, 48206	-4.31055	1
ENSMUSG00000120202	ENSMUSG00000120202	novel transcript	-4.30552	0.00175951
ENSMUSG00000114617	Gm48766	predicted gene, 48766	-4.29952	1
ENSMUSG00000065176	Rnu12	RNA U12, small nuclear	-4.2963	1
ENSMUSG00000106386	Gm42991	predicted gene 42991	-4.29466	1
ENSMUSG00000026770	Il2ra	interleukin 2 receptor, alpha chain	-4.28971	1
ENSMUSG00000054580	Pla2r1	phospholipase A2 receptor 1	-4.28971	1
ENSMUSG00000004821	Tmed11	transmembrane p24 trafficking protein 11	-4.28971	1
ENSMUSG00000081223	Gm12247	predicted gene 12247	-4.28783	1
ENSMUSG00000104361	Gm38080	predicted gene, 38080	-4.26569	1
ENSMUSG00000112097	Gm32515	predicted gene, 32515	-4.26058	1
ENSMUSG00000040612	Ildr2	immunoglobulin-like domain containing receptor 2	-4.26058	1
ENSMUSG00000008932	Slc1a7	solute carrier family 1 (glutamate transporter), member 7	-4.26058	1
ENSMUSG00000114781	Gm47463	predicted gene, 47463	-4.25493	1
ENSMUSG00000027376	Prom2	prominin 2	-4.23942	0.34291
ENSMUSG00000108689	Gm45354	predicted gene 45354	-4.23863	1
ENSMUSG00000120186	ENSMUSG00000120186	novel transcript	-4.23862	1
ENSMUSG00000112218	Gm18726	predicted gene, 18726	-4.23711	1
ENSMUSG00000021943	Gdf10	growth differentiation factor 10	-4.23627	1
ENSMUSG00000072673	Gm10392	predicted gene 10392	-4.22867	1
ENSMUSG00000102401	Gm37864	predicted gene, 37864	-4.22826	1
ENSMUSG00000030017	Reg3g	regenerating islet-derived 3 gamma	-4.22826	1
ENSMUSG00000034810	Scn7a	sodium channel, voltage-gated, type VII, alpha	-4.22826	1
ENSMUSG00000113738	Gm40910	predicted gene, 40910	-4.22561	1
ENSMUSG00000029915	Clec5a	C-type lectin domain family 5, member a	-4.22315	1
ENSMUSG00000115141	Gm49256	predicted gene, 49256	-4.22193	1
ENSMUSG00000059089	Fcgr4	Fc receptor, IgG, low affinity IV	-4.22106	1
ENSMUSG00000048782	Insc	INSC spindle orientation adaptor protein	-4.21719	0.112314
ENSMUSG00000096449	Gm4076	predicted gene 4076	-4.20547	0.0384154
ENSMUSG00000094344	Gm11942	predicted gene 11942	-4.20407	1
ENSMUSG00000039155	Cdh26	cadherin-like 26	-4.2031	1
ENSMUSG00000098211	Gm27045	predicted gene, 27045	-4.20116	1
ENSMUSG00000104342	Gm36401	predicted gene, 36401	-4.19914	1
ENSMUSG00000070713	Hmgn2-ps	high mobility group nucleosomal binding domain 2, pseudogene	-4.18772	1.64609e-15
ENSMUSG00000088984	Gm25604	predicted gene, 25604	-4.17696	1
ENSMUSG00000100319	Gm5256	predicted gene 5256	-4.17005	1
ENSMUSG00000028859	Csf3r	colony stimulating factor 3 receptor (granulocyte)	-4.16407	1
ENSMUSG00000022122	Ednrb	endothelin receptor type B	-4.16407	1
ENSMUSG00000028177	1810013D15Rik	RIKEN cDNA 1810013D15 gene	-4.16311	1
ENSMUSG00000097098	9330111N05Rik	RIKEN cDNA 9330111N05 gene	-4.15516	1
ENSMUSG00000034387	Ssu2	ssu-2 homolog (C. elegans)	-4.15508	1
ENSMUSG00000082045	Gm11585	predicted gene 11585	-4.15259	1
ENSMUSG00000091794	Vmn2r18	vomeronasal 2, receptor 18	-4.15233	1
ENSMUSG00000103317	Gm38359	predicted gene, 38359	-4.15142	1
ENSMUSG00000107952	Gm6352	predicted gene 6352	-4.1479	1
ENSMUSG00000086920	Gm12207	predicted gene 12207	-4.1429	0.0634943
ENSMUSG00000084201	Gm11926	predicted gene 11926	-4.13791	1
ENSMUSG00000069707	Taar4	trace amine-associated receptor 4	-4.1362	1
ENSMUSG00000111481	Gm47652	predicted gene, 47652	-4.13154	1
ENSMUSG00000010825	Grid2ip	glutamate receptor, ionotropic, delta 2 (Grid2) interacting protein 1	-4.12512	1
ENSMUSG00000093695	Gm20717	predicted gene 20717	-4.12333	1
ENSMUSG00000115777	Gm32815	predicted gene, 32815	-4.12333	1
ENSMUSG00000104044	Gm37566	predicted gene, 37566	-4.12333	1
ENSMUSG00000030474	Siglece	sialic acid binding Ig-like lectin E	-4.12333	1
ENSMUSG00000044827	Tlr1	toll-like receptor 1	-4.12333	1
ENSMUSG00000106061	Gm43773	predicted gene 43773	-4.11798	1
ENSMUSG00000031075	Ano1	anoctamin 1, calcium activated chloride channel	-4.11575	1
ENSMUSG00000020490	Btnl10	butyrophilin-like 10	-4.11575	1
ENSMUSG00000044583	Tlr7	toll-like receptor 7	-4.11549	1
ENSMUSG00000105945	Gm43570	predicted gene 43570	-4.11459	1
ENSMUSG00000091058	Gm17538	predicted gene, 17538	-4.11376	1
ENSMUSG00000090881	Phf11	PHD finger protein 11	-4.11247	1
ENSMUSG00000026458	Ppfia4	protein tyrosine phosphatase, receptor type, f polypeptide (PTPRF), interacting protein (liprin), alpha 4	-4.10988	1
ENSMUSG00000102123	Gm4319	predicted gene 4319	-4.10957	1
ENSMUSG00000097040	2610316D01Rik	RIKEN cDNA 2610316D01 gene	-4.10856	1
ENSMUSG00000120562	ENSMUSG00000120562	novel transcript	-4.10647	5.06444e-05
ENSMUSG00000058740	Kcnt1	potassium channel, subfamily T, member 1	-4.10578	1
ENSMUSG00000043223	Gm4835	predicted pseudogene 4835	-4.10454	1
ENSMUSG00000043008	Klhl6	kelch-like 6	-4.10245	0.189728
ENSMUSG00000097424	1700030M09Rik	RIKEN cDNA 1700030M09 gene	-4.0969	1
ENSMUSG00000103138	Gm2238	predicted gene 2238	-4.0969	1
ENSMUSG00000106202	Gm43727	predicted gene 43727	-4.0969	1
ENSMUSG00000106241	Gm43143	predicted gene 43143	-4.0963	1
ENSMUSG00000033777	Tlr13	toll-like receptor 13	-4.0963	1
ENSMUSG00000015957	Wnt11	wingless-type MMTV integration site family, member 11	-4.0963	1
ENSMUSG00000083219	Gm11410	predicted gene 11410	-4.09481	1
ENSMUSG00000067158	Col4a4	collagen, type IV, alpha 4	-4.09237	1
ENSMUSG00000035129	Gm6781	predicted gene 6781	-4.09171	0.0968925
ENSMUSG00000072571	Tmem253	transmembrane protein 253	-4.08809	1
ENSMUSG00000092130	D030025P21Rik	RIKEN cDNA D030025P21 gene	-4.08401	1
ENSMUSG00000078377	Gm4294	predicted gene 4294	-4.08246	1
ENSMUSG00000035004	Igsf6	immunoglobulin superfamily, member 6	-4.07884	1
ENSMUSG00000103000	Gm37900	predicted gene, 37900	-4.07576	1
ENSMUSG00000043618	Eif5al3-ps	eukaryotic translation initiation factor 5A-like 3, pseudogene	-4.07352	1
ENSMUSG00000112546	Gm6992	predicted gene 6992	-4.06867	0.0174321
ENSMUSG00000105358	Gm43099	predicted gene 43099	-4.06015	1
ENSMUSG00002076636	Gm55352	predicted gene, 55352	-4.05799	1
ENSMUSG00000118353	Nsa2-ps1	NSA2 ribosome biogenesis homolog, pseudogene 1	-4.05063	1
ENSMUSG00000048402	Gli2	GLI-Kruppel family member GLI2	-4.04857	1
ENSMUSG00000026866	Kynu	kynureninase	-4.04857	1
ENSMUSG00000090120	A730090N16Rik	RIKEN cDNA A730090N16 gene	-4.04542	1
ENSMUSG00000097875	Gm26704	predicted gene, 26704	-4.03617	1
ENSMUSG00000026288	Inpp5d	inositol polyphosphate-5-phosphatase D	-4.03503	1
ENSMUSG00000004892	Bcan	brevican	-4.02644	1
ENSMUSG00000062478	Ctrc	chymotrypsin C (caldecrin)	-4.02644	1
ENSMUSG00000026235	Epha4	Eph receptor A4	-4.02644	1
ENSMUSG00000110556	Gm45762	predicted gene 45762	-4.02644	1
ENSMUSG00000110442	Gm45804	predicted gene 45804	-4.02644	1
ENSMUSG00000042684	Npl	N-acetylneuraminate pyruvate lyase	-4.0176	1
ENSMUSG00000120539	ENSMUSG00000120539	novel transcript	-4.01625	1
ENSMUSG00000103216	Gm37248	predicted gene, 37248	-4.01067	1
ENSMUSG00000108724	Gm44734	predicted gene 44734	-4.01024	1
ENSMUSG00000006218	Fam131c	family with sequence similarity 131, member C	-4.00974	1
ENSMUSG00000120199	ENSMUSG00000120199	novel transcript	-4.00948	1
ENSMUSG00000107798	Gm44064	predicted gene, 44064	-4.00803	0.0262986
ENSMUSG00000056025	Clca3a1	chloride channel accessory 3A1	-3.99934	1
ENSMUSG00000037621	Atoh8	atonal bHLH transcription factor 8	-3.99801	1
ENSMUSG00000039521	Foxp3	forkhead box P3	-3.99801	1
ENSMUSG00000032355	Mlip	muscular LMNA-interacting protein	-3.99801	1
ENSMUSG00000103398	Gm38307	predicted gene, 38307	-3.9977	1
ENSMUSG00000099564	Gm28729	predicted gene 28729	-3.98799	1
ENSMUSG00000084221	Hmgb1-ps4	high mobility group box 1, pseudogene 4	-3.98323	1
ENSMUSG00000102630	Gm37289	predicted gene, 37289	-3.98036	1
ENSMUSG00000022103	Gfra2	glial cell line derived neurotrophic factor family receptor alpha 2	-3.97823	1
ENSMUSG00000026581	Sell	selectin, lymphocyte	-3.97823	1
ENSMUSG00000049233	Apoo-ps	apolipoprotein O, pseudogene	-3.97782	1.09944e-08
ENSMUSG00000120459	ENSMUSG00000120459	novel transcript	-3.97757	1
ENSMUSG00000074489	Bglap3	bone gamma-carboxyglutamate protein 3	-3.97377	1
ENSMUSG00000098131	Gm26989	predicted gene, 26989	-3.97296	1
ENSMUSG00000104814	Gm42979	predicted gene 42979	-3.97103	1
ENSMUSG00000052921	Arhgef15	Rho guanine nucleotide exchange factor (GEF) 15	-3.97036	1
ENSMUSG00000091930	Vmn2r52	vomeronasal 2, receptor 52	-3.97036	1
ENSMUSG00000107577	Gm44103	predicted gene, 44103	-3.95937	1
ENSMUSG00000067189	Gm7335	predicted gene 7335	-3.95903	1
ENSMUSG00000109793	Gm10043	predicted pseudogene 10043	-3.95456	1
ENSMUSG00000090319	Gm4462	predicted gene 4462	-3.95403	1
ENSMUSG00000090737	Gm6788	predicted gene 6788	-3.95403	1
ENSMUSG00000046607	Hrk	harakiri, BCL2 interacting protein (contains only BH3 domain)	-3.95237	1
ENSMUSG00000044485	Klk1b11	kallikrein 1-related peptidase b11	-3.95237	1
ENSMUSG00000075036	Gm10805	predicted gene 10805	-3.94923	1
ENSMUSG00000069041	Slc25a31	solute carrier family 25 (mitochondrial carrier; adenine nucleotide translocator), member 31	-3.94735	0.0597132
ENSMUSG00000120248	ENSMUSG00000120248	novel transcript	-3.94331	1
ENSMUSG00000046341	Gm11223	predicted gene 11223	-3.94259	1
ENSMUSG00000084168	Atp5l2-ps	ATP synthase, H+ transporting, mitochondrial FO complex, subunit G2, pseudogene	-3.93466	1
ENSMUSG00000021536	Adcy2	adenylate cyclase 2	-3.93397	1
ENSMUSG00000086509	Nkx2-2os	NK2 homeobox 2, opposite strand	-3.93316	1
ENSMUSG00000115040	Gm18994	predicted gene, 18994	-3.93102	1
ENSMUSG00000102384	Gm38143	predicted gene, 38143	-3.93102	1
ENSMUSG00000044726	Erich5	glutamate rich 5	-3.92846	0.0983829
ENSMUSG00000095168	Gm4795	predicted pseudogene 4795	-3.92213	1
ENSMUSG00000085596	Gm11476	predicted gene 11476	-3.91237	1
ENSMUSG00000113875	D230030E09Rik	Riken cDNA D230030E09 gene	-3.91234	1
ENSMUSG00000118319	Gm2176	predicted gene 2176	-3.90421	1
ENSMUSG00000058809	Hspd1-ps3	heat shock protein 1 (chaperonin), pseudogene 3	-3.90208	0.00012067
ENSMUSG00000028946	Hes3	hes family bHLH transcription factor 3	-3.90204	1
ENSMUSG00000028838	Extl1	exostosin-like glycosyltransferase 1	-3.89899	0.116692
ENSMUSG00000104482	Gm38064	predicted gene, 38064	-3.89729	1
ENSMUSG00000078126	Rpl23a-ps3	ribosomal protein L23A, pseudogene 3	-3.89559	1
ENSMUSG00000066068	Gm13611	predicted gene 13611	-3.89008	1
ENSMUSG00000074364	Ehd2	EH-domain containing 2	-3.88766	1
ENSMUSG00000044976	Wdr72	WD repeat domain 72	-3.88654	1
ENSMUSG00000113137	Gm7511	predicted gene 7511	-3.88052	1
ENSMUSG00000096770	Amy2a4	amylase 2a4	-3.87978	1
ENSMUSG00000084347	Akt2-ps	thymoma viral proto-oncogene 2, pseudogene	-3.87956	0.00420513
ENSMUSG00000064193	Gm4735	predicted gene 4735	-3.87854	1.23365e-05
ENSMUSG00000014852	Adamts13	a disintegrin-like and metallopeptidase (reprolysin type) with thrombospondin type 1 motif, 13	-3.87624	1
ENSMUSG00000072647	Adam1a	a disintegrin and metallopeptidase domain 1a	-3.87429	1
ENSMUSG00000108522	Gm44664	predicted gene 44664	-3.87429	1
ENSMUSG00000108726	Gm30684	predicted gene, 30684	-3.87421	1
ENSMUSG00000117239	Gpr31c	G protein-coupled receptor 31, D17Leh66c region	-3.86685	1
ENSMUSG00000027895	Kcnc4	potassium voltage gated channel, Shaw-related subfamily, member 4	-3.86076	1
ENSMUSG00000081010	Gm13880	predicted gene 13880	-3.86044	1
ENSMUSG00000087117	Gm11523	predicted gene 11523	-3.85989	1
ENSMUSG00000100701	Gm19587	predicted gene, 19587	-3.85895	1
ENSMUSG00000104802	Gm5869	predicted gene 5869	-3.85789	1
ENSMUSG00000109385	Gm44518	predicted gene 44518	-3.85616	1
ENSMUSG00000067038	Rps12-ps3	ribosomal protein S12, pseudogene 3	-3.85321	1
ENSMUSG00000104670	Gm9369	predicted pseudogene 9369	-3.84177	1
ENSMUSG00000046683	0610025J13Rik	RIKEN cDNA 0610025J13 gene	-3.84078	1
ENSMUSG00000062554	Gm12751	predicted gene 12751	-3.83443	1
ENSMUSG00000063193	Cd300lb	CD300 molecule like family member B	-3.83384	1
ENSMUSG00000103482	Gm37999	predicted gene, 37999	-3.83384	1
ENSMUSG00000030616	Sytl2	synaptotagmin-like 2	-3.83384	1
ENSMUSG00000068165	Gm10233	predicted pseudogene 10233	-3.82887	1
ENSMUSG00000116620	Gm4828	predicted gene 4828	-3.82727	1
ENSMUSG00000041538	H2-Ob	histocompatibility 2, O region beta locus	-3.8262	1
ENSMUSG00000051257	Trap1a	tumor rejection antigen P1A	-3.8262	1
ENSMUSG00000111270	Gm47066	predicted gene, 47066	-3.82343	1
ENSMUSG00000023935	Spats1	spermatogenesis associated, serine-rich 1	-3.82161	1
ENSMUSG00000045034	Ankrd34b	ankyrin repeat domain 34B	-3.81704	1
ENSMUSG00000083563	Gm13340	predicted gene 13340	-3.81359	2.52152e-21
ENSMUSG00000097245	Gm5421	predicted gene 5421	-3.81201	0.00434104
ENSMUSG00000104122	Gm37482	predicted gene, 37482	-3.80996	1
ENSMUSG00000074766	Ism1	isthmin 1, angiogenesis inhibitor	-3.80654	0.120949
ENSMUSG00000055632	Hmcn2	hemicentin 2	-3.79994	1
ENSMUSG00000082241	Gng5-ps	G protein subunit gamma 5, pseudogene	-3.79619	1
ENSMUSG00000082028	Gm1826	predicted gene 1826	-3.79603	1
ENSMUSG00000044303	Cdkn2a	cyclin dependent kinase inhibitor 2A	-3.79236	1
ENSMUSG00000069892	9930111J21Rik2	RIKEN cDNA 9930111J21 gene 2	-3.79173	1
ENSMUSG00000027570	Col9a3	collagen, type IX, alpha 3	-3.79173	1
ENSMUSG00000067615	Krt81	keratin 81	-3.79173	1
ENSMUSG00000028073	Pear1	platelet endothelial aggregation receptor 1	-3.79173	1
ENSMUSG00000097657	Gm7389	predicted gene 7389	-3.79031	1
ENSMUSG00000082617	Smt3h2-ps	SMT3 suppressor of mif two 3 homolog 2, pseudogene (S. cerevisiae)	-3.78925	0.00166778
ENSMUSG00000111364	Gm36745	predicted gene, 36745	-3.7869	1
ENSMUSG00000031304	Il2rg	interleukin 2 receptor, gamma chain	-3.7869	1
ENSMUSG00000000555	Itga5	integrin alpha 5 (fibronectin receptor alpha)	-3.7869	1
ENSMUSG00000058755	Osm	oncostatin M	-3.7869	1
ENSMUSG00000109181	Gm5605	predicted gene 5605	-3.78357	1
ENSMUSG00000111844	Gm47097	predicted gene, 47097	-3.7827	1
ENSMUSG00000096569	Amy2a2	amylase 2a2	-3.7811	1
ENSMUSG00000085755	Gm13496	predicted gene 13496	-3.77833	1
ENSMUSG00000089975	Gm7420	predicted gene 7420	-3.77655	1
ENSMUSG00000040592	Cd79b	CD79B antigen	-3.77385	0.366554
ENSMUSG00000120611	ENSMUSG00000120611	novel transcript	-3.76894	1
ENSMUSG00000078480	Mrpl48-ps	mitochondrial ribosomal protein L48 pseudogene	-3.76016	1
ENSMUSG00000078964	Ces1b	carboxylesterase 1B	-3.76002	1
ENSMUSG00000033066	Gas7	growth arrest specific 7	-3.76002	1
ENSMUSG00000093465	Gm20682	predicted gene 20682	-3.76002	1
ENSMUSG00000019997	Ccn2	cellular communication network factor 2	-3.75646	1
ENSMUSG00000105789	Gm42997	predicted gene 42997	-3.74966	1
ENSMUSG00000117669	Gm5509	predicted gene 5509	-3.74596	1
ENSMUSG00000088493	Gm24401	predicted gene, 24401	-3.74547	1
ENSMUSG00000015355	Cd48	CD48 antigen	-3.74372	1
ENSMUSG00000117893	Gm46658	predicted gene, 46658	-3.74372	1
ENSMUSG00000112112	Gm48508	predicted gene, 48508	-3.74372	1
ENSMUSG00000116832	Gm49658	predicted gene, 49658	-3.74372	1
ENSMUSG00000010142	Tnfrsf13b	tumor necrosis factor receptor superfamily, member 13b	-3.74372	1
ENSMUSG00000071553	Cpa2	carboxypeptidase A2, pancreatic	-3.74363	0.114764
ENSMUSG00000069310	H3c3	H3 clustered histone 3	-3.7398	1
ENSMUSG00000048349	Pou4f1	POU domain, class 4, transcription factor 1	-3.73617	1
ENSMUSG00000102762	4930403P22Rik	RIKEN cDNA 4930403P22 gene	-3.73404	1
ENSMUSG00000107428	Gm44154	predicted gene, 44154	-3.73078	1
ENSMUSG00000121224	ENSMUSG00000121224	novel transcript, antisense to RP23-175J8.3	-3.72867	1
ENSMUSG00000015890	Amdhd1	amidohydrolase domain containing 1	-3.72437	1
ENSMUSG00000117289	1700093J21Rik	RIKEN cDNA 1700093J21 gene	-3.72372	1
ENSMUSG00000072460	Atp5l-ps1	ATP synthase, H+ transporting, mitochondrial F0 complex, subunit G, pseudogene 1	-3.72115	1
ENSMUSG00000104873	Gm40332	predicted gene, 40332	-3.72032	1
ENSMUSG00000010064	Slc38a3	solute carrier family 38, member 3	-3.71809	0.0210327
ENSMUSG00000109464	Gm34350	predicted gene, 34350	-3.71539	1
ENSMUSG00000110758	Gm48092	predicted gene, 48092	-3.70906	1
ENSMUSG00000051504	Siglech	sialic acid binding Ig-like lectin H	-3.70906	1
ENSMUSG00000024818	Slc25a45	solute carrier family 25, member 45	-3.70906	1
ENSMUSG00000067231	Cyp2c65	cytochrome P450, family 2, subfamily c, polypeptide 65	-3.70758	1
ENSMUSG00000050578	Mmp13	matrix metallopeptidase 13	-3.70653	1
ENSMUSG00000021567	Nkd2	naked cuticle 2	-3.70653	1
ENSMUSG00000100241	Slc18a3	solute carrier family 18 (vesicular monoamine), member 3	-3.70653	1
ENSMUSG00000118252	Gm5521	predicted gene 5521	-3.70596	0.00186047
ENSMUSG00000113788	Gm47904	predicted gene, 47904	-3.70479	1
ENSMUSG00000026114	Cnga3	cyclic nucleotide gated channel alpha 3	-3.70417	1
ENSMUSG00000071517	Gm10334	predicted gene 10334	-3.70417	1
ENSMUSG00000037254	Itih2	inter-alpha trypsin inhibitor, heavy chain 2	-3.69974	1
ENSMUSG00002075070	Gm55415	predicted gene, 55415	-3.69217	1
ENSMUSG00000121046	ENSMUSG00000121046	novel transcript	-3.69034	1
ENSMUSG00000082016	Pgam1-ps2	phosphoglycerate mutase 1, pseudogene 2	-3.68878	0.000497707
ENSMUSG00000120403	ENSMUSG00000120403	novel transcript	-3.68522	1
ENSMUSG00000089695	Gm15946	predicted gene 15946	-3.68041	1
ENSMUSG00000116093	Gm3888	predicted gene 3888	-3.67947	1
ENSMUSG00000105174	Gm43353	predicted gene 43353	-3.67601	1
ENSMUSG00000028972	Car6	carbonic anhydrase 6	-3.67533	1
ENSMUSG00000077107	Mir344c	microRNA 344c	-3.67463	1
ENSMUSG00000029925	Tbxas1	thromboxane A synthase 1, platelet	-3.67461	1
ENSMUSG00000109894	Gm5904	predicted gene 5904	-3.67423	1
ENSMUSG00000075307	Klhl41	kelch-like 41	-3.67409	1
ENSMUSG00000105057	Gm40190	predicted gene, 40190	-3.6722	1
ENSMUSG00000110504	Gm45797	predicted gene 45797	-3.66232	1
ENSMUSG00000120722	ENSMUSG00000120722	novel transcript	-3.65663	1
ENSMUSG00000066072	Cyp4a10	cytochrome P450, family 4, subfamily a, polypeptide 10	-3.65624	1
ENSMUSG00000097491	Gm2366	predicted gene 2366	-3.65624	1
ENSMUSG00000105990	Gm43307	predicted gene 43307	-3.65624	1
ENSMUSG00000048217	Nags	N-acetylglutamate synthase	-3.65624	1
ENSMUSG00000118837	Rnu2-10	U2 small nuclear RNA 10	-3.6556	0.00152581
ENSMUSG00000029092	D5Ertd615e	DNA segment, Chr 5, ERATO Doi 615, expressed	-3.65076	1
ENSMUSG00000099397	Gm7809	predicted gene 7809	-3.65074	1
ENSMUSG00000097187	Gm19426	predicted gene, 19426	-3.64951	1
ENSMUSG00000120235	ENSMUSG00000120235	novel transcript	-3.64903	1
ENSMUSG00000052854	Nrk	Nik related kinase	-3.63619	1
ENSMUSG00000041390	Mdfic	MyoD family inhibitor domain containing	-3.636	1
ENSMUSG00000115700	Gm7517	predicted gene 7517	-3.63276	1
ENSMUSG00000117434	1810014P07Rik	RIKEN cDNA 1810014P07 gene	-3.63217	1
ENSMUSG00000120644	ENSMUSG00000120644	novel transcript	-3.62709	1
ENSMUSG00000021200	Asb2	ankyrin repeat and SOCS box-containing 2	-3.62677	1
ENSMUSG00000015852	Fcrls	Fc receptor-like S, scavenger receptor	-3.62677	1
ENSMUSG00000092268	Gm20540	predicted gene 20540	-3.62555	0.271587
ENSMUSG00000112871	Gm35404	predicted gene, 35404	-3.62515	1
ENSMUSG00000098609	Anxa11os	annexin A11, opposite strand	-3.62382	1
ENSMUSG00000112948	Gm48871	predicted gene, 48871	-3.62112	1
ENSMUSG00000022376	Adcy8	adenylate cyclase 8	-3.62036	1
ENSMUSG00000037014	Sstr4	somatostatin receptor 4	-3.61536	0.27382
ENSMUSG00000020787	P2rx1	purinergic receptor P2X, ligand-gated ion channel, 1	-3.61373	1
ENSMUSG00000120101	ENSMUSG00000120101	novel transcript	-3.61371	0.055858
ENSMUSG00000082938	Gm2810	predicted pseudogene 2810	-3.61327	1
ENSMUSG00000115312	Gm8518	predicted gene 8518	-3.61293	1
ENSMUSG00000104031	Gm17771	predicted gene, 17771	-3.6126	1
ENSMUSG00000120976	ENSMUSG00000120976	novel transcript	-3.61095	1
ENSMUSG00000047797	Gjb1	gap junction protein, beta 1	-3.61095	1
ENSMUSG00000108926	Gm10988	predicted gene 10988	-3.61095	1
ENSMUSG00000041886	Macc1	metastasis associated in colon cancer 1	-3.61095	1
ENSMUSG00000059422	Gm8116	predicted gene 8116	-3.60689	0.067275
ENSMUSG00000117886	Gm2106	predicted gene 2106	-3.60666	1
ENSMUSG00000113789	Gm47322	predicted gene, 47322	-3.60666	1
ENSMUSG00000031138	F9	coagulation factor IX	-3.59998	1
ENSMUSG00000117039	Gm32358	predicted gene, 32358	-3.59998	1
ENSMUSG00000080774	Gm9143	predicted gene 9143	-3.59998	1
ENSMUSG00000114319	Gm47509	predicted gene, 47509	-3.59947	1
ENSMUSG00000100959	Idi1-ps5	isopentenyl-diphosphate delta isomerase, pseudogene 5	-3.59517	1
ENSMUSG00000108239	Gm19434	predicted gene, 19434	-3.59511	1
ENSMUSG00000086794	Gm11642	predicted gene 11642	-3.58934	0.0386544
ENSMUSG00000105962	Gm42432	predicted gene 42432	-3.58881	1
ENSMUSG00000114759	Gm10257	predicted gene 10257	-3.58536	1
ENSMUSG00000112263	Gm47874	predicted gene, 47874	-3.58148	1
ENSMUSG00000097575	Gm26796	predicted gene, 26796	-3.57998	1
ENSMUSG00000081455	Hmgb1-ps3	high mobility group box 1, pseudogene 3	-3.57488	1
ENSMUSG00000059173	Pde1a	phosphodiesterase 1A, calmodulin-dependent	-3.56785	1
ENSMUSG00000104103	Gm9517	predicted gene 9517	-3.56625	0.0572251
ENSMUSG00000090925	1810064F22Rik	RIKEN cDNA 1810064F22 gene	-3.56311	1
ENSMUSG00000079009	Gm14139	predicted gene 14139	-3.56311	1
ENSMUSG00000106049	Gm43019	predicted gene 43019	-3.56311	1
ENSMUSG00000026395	Ptprc	protein tyrosine phosphatase, receptor type, C	-3.56232	0.157389
ENSMUSG00000000901	Mmp11	matrix metallopeptidase 11	-3.56228	1
ENSMUSG00000028864	Hgf	hepatocyte growth factor	-3.56061	0.267901
ENSMUSG00000087678	Gm14120	predicted gene 14120	-3.55714	1
ENSMUSG00000081152	Gm12430	predicted gene 12430	-3.55562	1
ENSMUSG00000097833	Gm5976	predicted gene 5976	-3.55397	1
ENSMUSG00000001021	S100a3	S100 calcium binding protein A3	-3.55125	1
ENSMUSG00000103706	6820402A03Rik	RIKEN cDNA 6820402A03 gene	-3.54987	1
ENSMUSG00000104449	Gm37255	predicted gene, 37255	-3.54884	1
ENSMUSG00000038665	Dgki	diacylglycerol kinase, iota	-3.54851	0.448146
ENSMUSG00000087571	Gm15202	predicted gene 15202	-3.54808	1
ENSMUSG00000025735	Rhbdl1	rhomboid like 1	-3.54637	1
ENSMUSG00000081111	Gm5913	predicted gene 5913	-3.54396	0.00434104
ENSMUSG00000116836	Gm49727	predicted gene, 49727	-3.54348	1
ENSMUSG00000110202	Gm45435	predicted gene 45435	-3.54103	1
ENSMUSG00000031779	Ccl22	chemokine (C-C motif) ligand 22	-3.53951	1
ENSMUSG00000113841	Gm48701	predicted gene, 48701	-3.53951	1
ENSMUSG00000091905	Dnajb6-ps	DnaJ heat shock protein family (Hsp40) member B6, pseudogene	-3.53894	0.00994663
ENSMUSG00000090125	Pou3f1	POU domain, class 3, transcription factor 1	-3.53736	1
ENSMUSG00000081552	Gm12328	predicted gene 12328	-3.53031	0.00406615
ENSMUSG00000040229	Gpr34	G protein-coupled receptor 34	-3.53026	1
ENSMUSG00000098627	4930524O08Rik	RIKEN cDNA 4930524O08 gene	-3.52872	1
ENSMUSG00000070522	Gm6505	predicted pseudogene 6505	-3.52823	1
ENSMUSG00000106664	Gm17936	predicted gene, 17936	-3.52808	1
ENSMUSG00000102808	5430420F09Rik	RIKEN cDNA 5430420F09 gene	-3.52765	1
ENSMUSG00000121153	ENSMUSG00000121153	novel transcript, antisense to Adipor2	-3.52739	1
ENSMUSG00000120030	ENSMUSG00000120030	novel transcript	-3.51731	1
ENSMUSG00000113892	Gm48605	predicted gene, 48605	-3.51445	1
ENSMUSG00000112449	Srp54b	signal recognition particle 54B	-3.51292	0.0185767
ENSMUSG00000081941	Gm11218	predicted gene 11218	-3.51277	1
ENSMUSG00000085383	Gm14218	predicted gene 14218	-3.51277	1
ENSMUSG00000098000	Gm27026	predicted gene, 27026	-3.51277	1
ENSMUSG00000047562	Mmp10	matrix metallopeptidase 10	-3.51277	1
ENSMUSG00000000244	Tspan32	tetraspanin 32	-3.51161	1
ENSMUSG00000033831	Fgb	fibrinogen beta chain	-3.51128	1
ENSMUSG00000110661	Gm31805	predicted gene, 31805	-3.51128	1
ENSMUSG00000114896	Gm34245	predicted gene, 34245	-3.51128	1
ENSMUSG00000037035	Inhbb	inhibin beta-B	-3.51128	1
ENSMUSG00000059481	Plg	plasminogen	-3.51128	1
ENSMUSG00000120016	ENSMUSG00000120016	novel transcript	-3.51055	1
ENSMUSG00000115819	Gm9108	predicted gene 9108	-3.50823	1
ENSMUSG00000100078	Gm6170	predicted gene 6170	-3.50297	0.0566858
ENSMUSG00000108714	Gm21057	predicted gene, 21057	-3.50092	1
ENSMUSG00000029675	Eln	elastin	-3.49936	1
ENSMUSG00000021490	Slc34a1	solute carrier family 34 (sodium phosphate), member 1	-3.49936	1
ENSMUSG00000105568	Gm42971	predicted gene 42971	-3.49842	1
ENSMUSG00000102833	Gm9694	predicted gene 9694	-3.49568	1
ENSMUSG00000051758	4930544M13Rik	RIKEN cDNA 4930544M13 gene	-3.49495	1
ENSMUSG00000059776	Rpl13-ps6	ribosomal protein L13, pseudogene 6	-3.49336	0.072379
ENSMUSG00000082179	Gm11407	predicted gene 11407	-3.49212	1
ENSMUSG00000116499	Gm7318	predicted gene 7318	-3.4902	1
ENSMUSG00000025489	Ifitm5	interferon induced transmembrane protein 5	-3.48841	1
ENSMUSG00000081400	Gm13680	predicted gene 13680	-3.48789	0.0629106
ENSMUSG00000082743	Gm12988	predicted gene 12988	-3.47849	1
ENSMUSG00000034161	Scx	scleraxis	-3.47734	1
ENSMUSG00000102270	Gm8388	predicted gene 8388	-3.47696	1
ENSMUSG00000030244	Gys2	glycogen synthase 2	-3.47679	1
ENSMUSG00000068855	H2ac20	H2A clustered histone 20	-3.47637	1
ENSMUSG00000024761	Gm16437	predicted pseudogene 16437	-3.47533	0.0157943
ENSMUSG00000026678	Rgs5	regulator of G-protein signaling 5	-3.4726	0.413405
ENSMUSG00000052912	Smarca5-ps	SWI/SNF related, matrix associated, actin depenent ragulator of chromatin, subfamily a, member 5, pseudogene	-3.47014	1
ENSMUSG00000029788	Cpa5	carboxypeptidase A5	-3.46957	1
ENSMUSG00000097231	Gm26852	predicted gene, 26852	-3.46712	1
ENSMUSG00000095478	Gm9824	predicted pseudogene 9824	-3.46464	0.000408519
ENSMUSG00000038521	C1s1	complement component 1, s subcomponent 1	-3.46356	1
ENSMUSG00000049676	Catsperg1	cation channel sperm associated auxiliary subunit gamma 1	-3.46356	1
ENSMUSG00000054978	Kbtbd13	kelch repeat and BTB (POZ) domain containing 13	-3.46356	1
ENSMUSG00000059060	Rad51b	RAD51 paralog B	-3.46356	1
ENSMUSG00000058252	Tcp11x2	t-complex 11 family, X-linked 2	-3.46356	1
ENSMUSG00000114393	Gm47359	predicted gene, 47359	-3.46136	1
ENSMUSG00000065609	Mir7-2	microRNA 7-2	-3.45929	1
ENSMUSG00000075465	Gm10837	predicted gene 10837	-3.4587	1
ENSMUSG00000106773	Gm43799	predicted gene 43799	-3.45445	1
ENSMUSG00000114389	Gm47734	predicted gene, 47734	-3.45301	1
ENSMUSG00000081643	Gm11605	predicted gene 11605	-3.4527	0.0824046
ENSMUSG00000024125	Sbpl	spermine binding protein-like	-3.45072	1
ENSMUSG00000044609	Gm9294	predicted pseudogene 9294	-3.44942	1
ENSMUSG00000028782	Adgrb2	adhesion G protein-coupled receptor B2	-3.44662	1
ENSMUSG00000036962	Cfap221	cilia and flagella associated protein 221	-3.44662	1
ENSMUSG00000103163	Gm38146	predicted gene, 38146	-3.44662	1
ENSMUSG00000109684	Gm45745	predicted gene 45745	-3.44588	1
ENSMUSG00000051255	Gm6563	predicted pseudogene 6563	-3.44496	1.69869e-15
ENSMUSG00000114401	Gm38604	predicted gene, 38604	-3.44479	1
ENSMUSG00000053353	2310001K24Rik	RIKEN cDNA 2310001K24 gene	-3.44308	1
ENSMUSG00000068117	Mei1	meiotic double-stranded break formation protein 1	-3.44218	1
ENSMUSG00000111942	Gm5182	predicted gene 5182	-3.4417	0.0853447
ENSMUSG00000074236	Gm9387	predicted pseudogene 9387	-3.43985	1
ENSMUSG00000082510	Gm11793	predicted gene 11793	-3.43963	1
ENSMUSG00000110524	Gm39228	predicted gene, 39228	-3.43466	1
ENSMUSG00000089906	Gm6428	predicted pseudogene 6428	-3.4346	1
ENSMUSG00000071665	Foxr2	forkhead box R2	-3.43343	1
ENSMUSG00000082208	Gm15379	predicted gene 15379	-3.43247	1
ENSMUSG00000102353	Gm38345	predicted gene, 38345	-3.43148	1
ENSMUSG00000101258	Gm29477	predicted gene 29477	-3.43081	1
ENSMUSG00000074340	Ovgp1	oviductal glycoprotein 1	-3.43067	1
ENSMUSG00000083852	Gm13007	predicted gene 13007	-3.4306	1
ENSMUSG00000093651	Gm5873	predicted gene 5873	-3.43011	1
ENSMUSG00000087193	Gm14820	predicted gene 14820	-3.43002	1
ENSMUSG00000070729	Gm12966	predicted gene 12966	-3.4292	0.0591544
ENSMUSG00000086893	Gm11365	predicted gene 11365	-3.41994	1
ENSMUSG00000106832	Gm42632	predicted gene 42632	-3.41994	1
ENSMUSG00000032357	Tinag	tubulointerstitial nephritis antigen	-3.41994	1
ENSMUSG00000058028	Zscan5b	zinc finger and SCAN domain containing 5B	-3.41994	1
ENSMUSG00000117813	Gm5823	predicted gene 5823	-3.41939	0.0936495
ENSMUSG00000101800	Rnf170-ps	ring finger protein 170, pseudogene	-3.41922	1
ENSMUSG00000093880	Tmem181c-ps	transmembrane protein 181C, pseudogene	-3.41602	1
ENSMUSG00000094076	Gm4767	predicted gene 4767	-3.41507	1
ENSMUSG00000095128	Gm5709	predicted gene 5709	-3.41381	1
ENSMUSG00000041216	Clvs1	clavesin 1	-3.4079	1
ENSMUSG00000082283	Gm14472	predicted gene 14472	-3.40694	1
ENSMUSG00000108465	Gm45110	predicted gene 45110	-3.40667	1
ENSMUSG00000086824	4930448D08Rik	RIKEN cDNA 4930448D08 gene	-3.40422	1
ENSMUSG00000110127	6430710M23Rik	RIKEN cDNA 6430710M23 gene	-3.40422	1
ENSMUSG00000049744	Arhgap15	Rho GTPase activating protein 15	-3.40422	1
ENSMUSG00000038526	Car14	carbonic anhydrase 14	-3.40422	1
ENSMUSG00000103232	Gm37160	predicted gene, 37160	-3.40422	1
ENSMUSG00000112311	Gm8153	predicted gene 8153	-3.39699	1
ENSMUSG00000085174	Gm16206	predicted gene 16206	-3.39408	1
ENSMUSG00000108709	4933431G14Rik	RIKEN cDNA 4933431G14 gene	-3.39042	1
ENSMUSG00000084775	Gm16741	predicted gene, 16741	-3.38689	0.0728001
ENSMUSG00000052188	Gm14964	predicted gene 14964	-3.38598	1
ENSMUSG00000031362	Xlr4c	X-linked lymphocyte-regulated 4C	-3.38416	0.233256
ENSMUSG00000036587	Fut7	fucosyltransferase 7	-3.38344	1
ENSMUSG00000089712	Gm15889	predicted gene 15889	-3.38344	1
ENSMUSG00000090958	Lrrc32	leucine rich repeat containing 32	-3.38344	1
ENSMUSG00000057378	Ryr3	ryanodine receptor 3	-3.3824	0.225456
ENSMUSG00000086124	A530076I17Rik	RIKEN cDNA A530076I17 gene	-3.38144	1
ENSMUSG00000022132	Cldn10	claudin 10	-3.3802	1
ENSMUSG00000117840	Gm50399	predicted gene, 50399	-3.3751	1
ENSMUSG00000099019	Gm27254	predicted gene 27254	-3.37117	1
ENSMUSG00000107035	Ybx1-ps2	Y box protein 1, pseudogene 2	-3.37071	1
ENSMUSG00000107586	Gm44283	predicted gene, 44283	-3.36773	1
ENSMUSG00000106827	Gm7556	predicted gene 7556	-3.36409	1
ENSMUSG00000107066	Gm4482	predicted gene 4482	-3.36158	1
ENSMUSG00000084840	Gm11468	predicted gene 11468	-3.36108	1
ENSMUSG00000037813	D630003M21Rik	RIKEN cDNA D630003M21 gene	-3.36001	0.268522
ENSMUSG00000089639	Gm2862	predicted gene 2862	-3.35964	1
ENSMUSG00000110617	Gm5910	predicted gene 5910	-3.35802	1
ENSMUSG00000104132	Gm36952	predicted gene, 36952	-3.35662	1
ENSMUSG00000094597	Gm4810	predicted gene 4810	-3.35662	1
ENSMUSG00000020437	Myo1g	myosin IG	-3.35662	1
ENSMUSG00000040866	Rsph6a	radial spoke head 6 homolog A (Chlamydomonas)	-3.35662	1
ENSMUSG00000000903	Vpreb3	pre-B lymphocyte gene 3	-3.35662	1
ENSMUSG00000107092	Gm7993	predicted gene 7993	-3.3527	0.0539379
ENSMUSG00000115205	Gm16374	predicted pseudogene 16374	-3.35171	1
ENSMUSG00000095595	Fam177a	family with sequence similarity 177, member A	-3.35126	1
ENSMUSG00000059763	Taar2	trace amine-associated receptor 2	-3.35114	0.169978
ENSMUSG00000113883	Gm36500	predicted gene, 36500	-3.35025	1
ENSMUSG00000033063	Cntnap3	contactin associated protein-like 3	-3.34734	1
ENSMUSG00000082190	Gm13641	predicted gene 13641	-3.34734	1
ENSMUSG00000118399	Gm18917	predicted gene, 18917	-3.34734	1
ENSMUSG00000104378	Gm37510	predicted gene, 37510	-3.34734	1
ENSMUSG00000104060	Gm37954	predicted gene, 37954	-3.34734	1
ENSMUSG00000103485	Gm38001	predicted gene, 38001	-3.34734	1
ENSMUSG00000080772	Gm12543	predicted gene 12543	-3.34669	1
ENSMUSG00000069622	Gm10273	predicted pseudogene 10273	-3.34536	1
ENSMUSG00000117428	Gm4833	predicted gene 4833	-3.34536	1
ENSMUSG00000090610	Gm3571	predicted gene 3571	-3.34406	0.0337672
ENSMUSG00000082193	Rpl5-ps1	ribosomal protein L5, pseudogene 1	-3.34281	1
ENSMUSG00000022753	Tmem30c	transmembrane protein 30C	-3.34281	1
ENSMUSG00000113753	Gm5791	predicted gene 5791	-3.34116	1
ENSMUSG00000048960	Prex2	phosphatidylinositol-3,4,5-trisphosphate-dependent Rac exchange factor 2	-3.3394	0.497356
ENSMUSG00000085407	1700095J03Rik	RIKEN cDNA 1700095J03 gene	-3.33817	0.236061
ENSMUSG00000078554	Fam229a	family with sequence similarity 229, member A	-3.3367	1
ENSMUSG00000002944	Cd36	CD36 molecule	-3.33609	0.00724643
ENSMUSG00000117257	Gm4948	predicted gene 4948	-3.33474	1
ENSMUSG00000082876	Gm11889	predicted gene 11889	-3.33454	1
ENSMUSG00000108670	Gm44815	predicted gene 44815	-3.33028	1
ENSMUSG00000116398	Gm5216	predicted gene 5216	-3.33019	1
ENSMUSG00000033450	Tagap	T cell activation Rho GTPase activating protein	-3.32973	0.113271
ENSMUSG00000015970	Chdh	choline dehydrogenase	-3.32264	1
ENSMUSG00000040345	Arhgap9	Rho GTPase activating protein 9	-3.32072	1
ENSMUSG00000085620	G630018N14Rik	RIKEN cDNA G630018N14 gene	-3.32072	1
ENSMUSG00000117084	Gm22146	predicted gene, 22146	-3.32072	1
ENSMUSG00000103707	Pcdha6	protocadherin alpha 6	-3.32072	1
ENSMUSG00000082576	Gm12058	predicted gene 12058	-3.3207	1
ENSMUSG00000120813	ENSMUSG00000120813	novel transcript, antisense to Zfp462	-3.31911	1
ENSMUSG00000085514	Bcas3os2	BCAS3 microtubule associated cell migration factor, opposite strand 2	-3.31705	1
ENSMUSG00000087006	Gm13889	predicted gene 13889	-3.3144	1
ENSMUSG00000120407	ENSMUSG00000120407	novel transcript	-3.31381	0.092956
ENSMUSG00000036816	Atoh7	atonal bHLH transcription factor 7	-3.31283	1
ENSMUSG00000100690	Gm4322	predicted gene 4322	-3.31253	1
ENSMUSG00000121178	ENSMUSG00000121178	novel transcript, antisense to Uba52and Kxd1	-3.30866	1
ENSMUSG00000110648	Gm38574	predicted gene, 38574	-3.30511	1
ENSMUSG00000100932	2210022D18Rik	RIKEN cDNA 2210022D18 gene	-3.30199	1
ENSMUSG00000040797	Iqsec3	IQ motif and Sec7 domain 3	-3.2995	0.166147
ENSMUSG00000082988	Gm5903	predicted gene 5903	-3.29914	1
ENSMUSG00000108847	B830042I05Rik	RIKEN cDNA B830042I05 gene	-3.29744	1
ENSMUSG00000031147	Magix	MAGI family member, X-linked	-3.29428	1
ENSMUSG00000082070	Gm1866	predicted gene 1866	-3.29075	0.117074
ENSMUSG00000083554	Gm6645	predicted gene 6645	-3.29067	1
ENSMUSG00000100426	Gm4208	predicted gene 4208	-3.28889	1
ENSMUSG00000111535	Gm35154	predicted gene, 35154	-3.28857	1
ENSMUSG00000113757	Gm47507	predicted gene, 47507	-3.28857	1
ENSMUSG00000027859	Ngf	nerve growth factor	-3.28857	1
ENSMUSG00000090470	Prr23a3	proline rich 23A, member 3	-3.28857	1
ENSMUSG00000047821	Trim16	tripartite motif-containing 16	-3.28857	1
ENSMUSG00000000125	Wnt3	wingless-type MMTV integration site family, member 3	-3.28857	1
ENSMUSG00000089780	Gm16306	predicted gene 16306	-3.28802	1
ENSMUSG00000081721	Gm13882	predicted gene 13882	-3.28495	1
ENSMUSG00000006205	Htra1	HtrA serine peptidase 1	-3.28467	1
ENSMUSG00000024168	Tmem204	transmembrane protein 204	-3.27999	1
ENSMUSG00000093649	Gm20614	predicted gene 20614	-3.27684	1
ENSMUSG00000114771	Gm49064	predicted gene, 49064	-3.27663	1
ENSMUSG00000120711	ENSMUSG00000120711	novel transcript	-3.27401	1
ENSMUSG00000120017	ENSMUSG00000120017	novel transcript	-3.2723	1
ENSMUSG00000105168	Gm30735	predicted gene, 30735	-3.26522	1
ENSMUSG00000086620	Rspo4os	R-spondin 4, opposite strand	-3.26255	1
ENSMUSG00002076904	Gm56018	predicted gene, 56018	-3.26049	1
ENSMUSG00000087198	Tmem274	transmembrame protein 274	-3.25854	1
ENSMUSG00000114430	Gm40264	predicted gene, 40264	-3.25848	1
ENSMUSG00000059049	Frem1	Fras1 related extracellular matrix protein 1	-3.25738	1
ENSMUSG00000108760	Gm31897	predicted gene, 31897	-3.25738	1
ENSMUSG00000098169	Gm5205	predicted gene 5205	-3.25738	1
ENSMUSG00000055523	Gucy2g	guanylate cyclase 2g	-3.25738	1
ENSMUSG00000096722	Hmgb1-ps9	high mobility group box 1, pseudogene 9	-3.25698	1
ENSMUSG00000086453	Gm11457	predicted gene 11457	-3.25347	1
ENSMUSG00000030111	A2m	alpha-2-macroglobulin	-3.25271	0.549729
ENSMUSG00000069008	Gm5537	predicted gene 5537	-3.25012	1
ENSMUSG00000021032	Ngb	neuroglobin	-3.24858	0.0112499
ENSMUSG00000085274	BC046401	cDNA sequence BC046401	-3.24658	1
ENSMUSG00000094103	Fam177a2	family with sequence similarity 177 member A2	-3.24452	1
ENSMUSG00000085611	Ap3s1-ps1	adaptor-related protein complex 3, sigma 1 subunit, pseudogene 1	-3.24436	0.00453491
ENSMUSG00000050234	Gja4	gap junction protein, alpha 4	-3.24111	1
ENSMUSG00000107120	Gm43059	predicted gene 43059	-3.24111	1
ENSMUSG00000033192	Lpcat2	lysophosphatidylcholine acyltransferase 2	-3.24111	1
ENSMUSG00000019888	Mgat4c	MGAT4 family, member C	-3.24111	1
ENSMUSG00000085201	Nr6a1os	nuclear receptor subfamily 6, group A, member 1, opposite strand	-3.24101	1
ENSMUSG00000116715	Gm40881	predicted gene, 40881	-3.24071	1
ENSMUSG00000106032	Gm42463	predicted gene 42463	-3.24071	1
ENSMUSG00000032017	Grik4	glutamate receptor, ionotropic, kainate 4	-3.24071	1
ENSMUSG00000046782	Ttc6	tetratricopeptide repeat domain 6	-3.24071	1
ENSMUSG00000120919	ENSMUSG00000120919	novel transcript	-3.23931	0.0447499
ENSMUSG00000085894	Gm15832	predicted gene 15832	-3.23805	1
ENSMUSG00000084331	Gm8163	predicted gene 8163	-3.23299	1
ENSMUSG00000120413	ENSMUSG00000120413	novel transcript	-3.2318	1
ENSMUSG00000040717	Il17rd	interleukin 17 receptor D	-3.23075	0.424317
ENSMUSG00000106940	Gm42930	predicted gene 42930	-3.22973	1
ENSMUSG00000110055	Gm18857	predicted gene, 18857	-3.22852	1
ENSMUSG00000004328	Hif3a	hypoxia inducible factor 3, alpha subunit	-3.2274	1
ENSMUSG00000104273	A530064N14Rik	RIKEN cDNA A530064N14 gene	-3.22651	0.191499
ENSMUSG00000080002	Gm5566	predicted pseudogene 5566	-3.22585	0.101459
ENSMUSG00000037438	Uqcrh-ps1	ubiquinol-cytochrome c reductase hinge protein, pseudogene 1	-3.22562	1
ENSMUSG00000084592	Mir1898	microRNA 1898	-3.22365	1
ENSMUSG00000098404	Mrip-ps	Mom radiation induced polyposis, pseudogene	-3.22344	1
ENSMUSG00000114851	Gm46409	predicted gene, 46409	-3.2227	1
ENSMUSG00000120590	ENSMUSG00000120590	novel transcript	-3.22243	1
ENSMUSG00000068587	Mgam	maltase-glucoamylase	-3.21823	0.0251416
ENSMUSG00000025983	Ccdc150	coiled-coil domain containing 150	-3.21417	1
ENSMUSG00000121237	ENSMUSG00000121237	novel transcript	-3.21417	1
ENSMUSG00000108442	Rpl15-ps5	ribosomal protein L15, pseudogene 5	-3.20909	1
ENSMUSG00000107048	Gm43807	predicted gene 43807	-3.20726	1
ENSMUSG00000081238	Gm15836	predicted gene 15836	-3.2068	1
ENSMUSG00000031364	Grpr	gastrin releasing peptide receptor	-3.20651	1
ENSMUSG00000109305	Smim38	small integral membrane protein 38	-3.20651	1
ENSMUSG00000087616	Gm14257	predicted gene 14257	-3.19972	1
ENSMUSG00000024857	Cabp2	calcium binding protein 2	-3.19787	1
ENSMUSG00000092051	Gm17229	predicted gene 17229	-3.1967	1
ENSMUSG00000116215	Gm5470	predicted gene 5470	-3.19281	1
ENSMUSG00000106302	Mir6902	microRNA 6902	-3.1927	1
ENSMUSG00000038811	Gngt2	guanine nucleotide binding protein (G protein), gamma transducing activity polypeptide 2	-3.1905	1
ENSMUSG00000068227	Il2rb	interleukin 2 receptor, beta chain	-3.18794	1
ENSMUSG00000029517	Ankrd7	ankyrin repeat domain 7	-3.18503	1
ENSMUSG00000022901	Cd86	CD86 antigen	-3.18181	1
ENSMUSG00000083325	Gm14121	predicted gene 14121	-3.1773	0.0396545
ENSMUSG00000065492	Mir34b	microRNA 34b	-3.17348	1
ENSMUSG00000120667	ENSMUSG00000120667	novel transcript	-3.17219	1
ENSMUSG00000113959	Gm46339	predicted gene, 46339	-3.17211	1
ENSMUSG00000083478	Gm15375	predicted gene 15375	-3.17172	1
ENSMUSG00000112491	Gm19801	predicted gene, 19801	-3.16871	1
ENSMUSG00000069011	Gm10254	predicted gene 10254	-3.16816	0.0668622
ENSMUSG00000114516	Gm46440	predicted gene, 46440	-3.16705	1
ENSMUSG00000064398	Gm23628	predicted gene, 23628	-3.16319	1
ENSMUSG00000025497	Cdhr5	cadherin-related family member 5	-3.16283	1
ENSMUSG00000104837	Gm42520	predicted gene 42520	-3.16283	1
ENSMUSG00000047996	Prrg1	proline rich Gla (G-carboxyglutamic acid) 1	-3.16283	1
ENSMUSG00000063529	Stmnd1	stathmin domain containing 1	-3.16283	1
ENSMUSG00000120405	ENSMUSG00000120405	novel transcript	-3.16052	1
ENSMUSG00000110325	Gm45293	predicted gene 45293	-3.15488	1
ENSMUSG00000105452	Gm5276	predicted gene 5276	-3.15	1
ENSMUSG00000036151	Tm6sf2	transmembrane 6 superfamily member 2	-3.14874	1
ENSMUSG00000117294	Gm49839	predicted gene, 49839	-3.14796	1
ENSMUSG00000120279	ENSMUSG00000120279	novel transcript	-3.14786	1
ENSMUSG00000004540	Psg17	pregnancy specific beta-1-glycoprotein 17	-3.1458	1
ENSMUSG00000031142	Cacna1f	calcium channel, voltage-dependent, alpha 1F subunit	-3.14449	0.345643
ENSMUSG00000107884	Gm44144	predicted gene, 44144	-3.14104	1
ENSMUSG00000087072	Recql5os1	RecQ-like 5, opposite strand 1	-3.14038	1
ENSMUSG00000092253	H2-Q3	histocompatibility 2, Q region locus 3	-3.13985	1
ENSMUSG00000107296	Gm43500	predicted gene 43500	-3.13849	1
ENSMUSG00000067276	Capn6	calpain 6	-3.13428	0.156249
ENSMUSG00000107234	Gm43371	predicted gene 43371	-3.1329	1
ENSMUSG00000002204	Napsa	napsin A aspartic peptidase	-3.13279	1
ENSMUSG00000112234	Gm48427	predicted gene, 48427	-3.13252	0.406034
ENSMUSG00000117425	Gm7464	predicted gene 7464	-3.12898	1
ENSMUSG00000080845	Gm9115	predicted gene 9115	-3.12677	1
ENSMUSG00000082932	Cyp2j8	cytochrome P450, family 2, subfamily j, polypeptide 8	-3.12557	1
ENSMUSG00000103401	Gm37929	predicted gene, 37929	-3.12557	1
ENSMUSG00000103967	Gm38214	predicted gene, 38214	-3.12557	1
ENSMUSG00000043484	Gm5867	predicted gene 5867	-3.12457	1
ENSMUSG00000110079	Gm45292	predicted gene 45292	-3.12278	1
ENSMUSG00000083725	Gm11865	predicted gene 11865	-3.12225	1
ENSMUSG00000082100	Glns-ps1	glutamine synthetase pseudogene 1	-3.12026	1
ENSMUSG00000092404	Gm9921	predicted gene 9921	-3.11925	1
ENSMUSG00000034645	Zyg11a	zyg-11 family member A, cell cycle regulator	-3.11925	1
ENSMUSG00000094437	Gm9830	predicted gene 9830	-3.11744	1
ENSMUSG00000114184	Gm7143	predicted gene 7143	-3.11618	1
ENSMUSG00000079339	Ifit1bl1	interferon induced protein with tetratricpeptide repeats 1B like 1	-3.11563	1
ENSMUSG00000043773	1700048O20Rik	RIKEN cDNA 1700048O20 gene	-3.11554	1
ENSMUSG00000051295	9630028B13Rik	RIKEN cDNA 9630028B13 gene	-3.11554	1
ENSMUSG00000120656	ENSMUSG00000120656	novel transcript	-3.11554	1
ENSMUSG00000073739	Gm16287	predicted gene 16287	-3.11554	1
ENSMUSG00000101587	Gm29036	predicted gene 29036	-3.11554	1
ENSMUSG00000118509	Gm39500	predicted gene, 39500	-3.11554	1
ENSMUSG00000055763	Rybp-ps	RING1 and YY1 binding protein, pseudogene	-3.1152	1
ENSMUSG00000115837	9130002K18Rik	RIKEN cDNA 9130002K18 gene	-3.11383	0.156048
ENSMUSG00000067106	Gm5529	predicted pseudogene 5529	-3.11368	0.0370953
ENSMUSG00000107971	Gm44260	predicted gene, 44260	-3.1124	1
ENSMUSG00000050534	Htr5b	5-hydroxytryptamine (serotonin) receptor 5B	-3.1124	1
ENSMUSG00000097650	4921507G05Rik	RIKEN cDNA 4921507G05 gene	-3.11236	1
ENSMUSG00000083245	Gm11185	predicted gene 11185	-3.10975	1
ENSMUSG00000095648	Gm2004	predicted gene 2004	-3.10584	1
ENSMUSG00000010080	Epn3	epsin 3	-3.10569	1
ENSMUSG00000063953	Amd2	S-adenosylmethionine decarboxylase 2	-3.10508	0.0100658
ENSMUSG00000112683	Gm18904	predicted gene, 18904	-3.10379	1
ENSMUSG00000081574	Gm14429	predicted gene 14429	-3.0999	0.182745
ENSMUSG00000066178	6030445D17Rik	RIKEN cDNA 6030445D17 gene	-3.09912	1
ENSMUSG00000085057	Gm13415	predicted gene 13415	-3.09912	1
ENSMUSG00000100429	Gm29186	predicted gene 29186	-3.09912	1
ENSMUSG00000084764	Grip1os2	glutamate receptor interacting protein 1, opposite strand 2	-3.09912	1
ENSMUSG00000090084	Srpx	sushi-repeat-containing protein	-3.09912	1
ENSMUSG00000085104	Gm11731	predicted gene 11731	-3.09691	1
ENSMUSG00000099662	Ppp1r2-ps2	protein phosphatase 1, regulatory (inhibitor) subunit 2, pseudogene 2	-3.09582	1
ENSMUSG00000103768	Gm37856	predicted gene, 37856	-3.09523	1
ENSMUSG00000032246	Calml4	calmodulin-like 4	-3.08678	1
ENSMUSG00000112269	Gm6906	predicted gene 6906	-3.08569	1
ENSMUSG00000078894	2210418O10Rik	RIKEN cDNA 2210418O10 gene	-3.0847	1
ENSMUSG00000101236	Gm6750	predicted gene 6750	-3.08383	1
ENSMUSG00000046411	Rps4l-ps	ribosomal protein S4-like, pseudogene	-3.08375	1
ENSMUSG00000058463	Gm5471	predicted pseudogene 5471	-3.08267	1
ENSMUSG00000097932	C430039J16Rik	RIKEN cDNA C430039J16 gene	-3.07982	1
ENSMUSG00000085723	Gm15915	predicted gene 15915	-3.0726	0.0999858
ENSMUSG00000108045	Gm5576	predicted pseudogene 5576	-3.07076	1
ENSMUSG00000095869	Ppp1r2-ps6	protein phosphatase 1, regulatory (inhibitor) subunit 2, pseudogene 6	-3.06982	1
ENSMUSG00000110446	Gm18646	predicted gene, 18646	-3.06843	1
ENSMUSG00000037071	Scd1	stearoyl-Coenzyme A desaturase 1	-3.06732	0.203766
ENSMUSG00000083863	Gm13341	predicted gene 13341	-3.06607	1.90867e-07
ENSMUSG00000032999	Nlrp4f	NLR family, pyrin domain containing 4F	-3.06598	1
ENSMUSG00000113389	Gm9512	predicted gene 9512	-3.06532	1
ENSMUSG00000025529	Zfp711	zinc finger protein 711	-3.06466	1
ENSMUSG00000111992	Gm47724	predicted gene, 47724	-3.05867	1
ENSMUSG00000058745	Gm9174	predicted pseudogene 9174	-3.05741	1
ENSMUSG00000105198	Gm42502	predicted gene 42502	-3.0565	1
ENSMUSG00000081453	Gm6767	predicted gene 6767	-3.05165	1
ENSMUSG00000070732	Rbm44	RNA binding motif protein 44	-3.05036	1
ENSMUSG00000117345	Gm7926	predicted gene 7926	-3.04419	1
ENSMUSG00000080832	M6pr-ps	mannose-6-phosphate receptor, pseudogene	-3.04395	1
ENSMUSG00000044268	Gm4895	predicted gene 4895	-3.04156	0.00215908
ENSMUSG00000061167	Rpl15-ps3	ribosomal protein L15, pseudogene 3	-3.03867	0.0675631
ENSMUSG00000055416	Fam136b-ps	family with sequence similarity 136, member B, pseudogene	-3.0382	1
ENSMUSG00000032207	Lipc	lipase, hepatic	-3.0362	1
ENSMUSG00000081232	Gm14373	predicted gene 14373	-3.03608	1
ENSMUSG00000060808	B9d1os	B9 protein domain 1, opposite strand	-3.03535	1
ENSMUSG00000110802	Gm47141	predicted gene, 47141	-3.03492	1
ENSMUSG00000119232	Mir692-2	microRNA 692-2	-3.03148	1
ENSMUSG00002076327	Gm55991	predicted gene, 55991	-3.03038	1
ENSMUSG00000074250	Gm10653	predicted gene 10653	-3.02783	1
ENSMUSG00000068699	Flnc	filamin C, gamma	-3.02783	0.493925
ENSMUSG00000039883	Lrrc17	leucine rich repeat containing 17	-3.02559	1
ENSMUSG00000107167	B3galt9	beta-1,3-galactosyltransferase 9	-3.02509	1
ENSMUSG00000084805	Gm12273	predicted gene 12273	-3.02509	1
ENSMUSG00000104315	Gm37906	predicted gene, 37906	-3.02509	1
ENSMUSG00000082922	Gm6939	predicted gene 6939	-3.02509	1
ENSMUSG00000020374	Rasgef1c	RasGEF domain family, member 1C	-3.02509	1
ENSMUSG00000099998	Gm6501	predicted gene 6501	-3.02391	1
ENSMUSG00000083518	Gm9429	predicted gene 9429	-3.02044	1
ENSMUSG00000090693	Trim43a	tripartite motif-containing 43A	-3.02044	1
ENSMUSG00000081594	Gm15467	predicted gene 15467	-3.01882	1
ENSMUSG00000120213	ENSMUSG00000120213	novel transcript	-3.01861	1
ENSMUSG00000114415	Gm41030	predicted gene, 41030	-3.01591	1
ENSMUSG00000075330	A930003A15Rik	RIKEN cDNA A930003A15 gene	-3.0125	1
ENSMUSG00000099045	Mir6374	microRNA 6374	-3.0111	1
ENSMUSG00000083465	Gm11652	predicted gene 11652	-3.01027	1
ENSMUSG00000110545	Gm7730	predicted gene 7730	-3.00732	0.010305
ENSMUSG00000018474	Chd3	chromodomain helicase DNA binding protein 3	-3.00708	1.01732e-16
ENSMUSG00000097995	Gm24362	predicted gene, 24362	-3.00642	1
ENSMUSG00000120630	ENSMUSG00000120630	novel transcript	-3.00203	1
ENSMUSG00002075108	Gm55572	predicted gene, 55572	-3.00171	1
ENSMUSG00000038147	Cd84	CD84 antigen	-3.00044	1
ENSMUSG00000089651	Gm16353	predicted gene 16353	-3.00044	1
ENSMUSG00000106535	Gm43031	predicted gene 43031	-3.00044	1
ENSMUSG00000045087	S1pr5	sphingosine-1-phosphate receptor 5	-3.00044	1
ENSMUSG00000025652	Tmem89	transmembrane protein 89	-3.00044	1
ENSMUSG00000110123	Gm18562	predicted gene, 18562	-2.99927	1.64279e-06
ENSMUSG00000086706	Gm15848	predicted gene 15848	-2.9977	0.165306
ENSMUSG00000079484	Phyhd1	phytanoyl-CoA dioxygenase domain containing 1	-2.9927	1
ENSMUSG00000085666	Tdg-ps2	thymine DNA glycosylase, pseudogene 2	-2.99205	1
ENSMUSG00000078238	Gm12854	predicted gene 12854	-2.98658	0.000844614
ENSMUSG00000108049	Gm44168	predicted gene, 44168	-2.98612	1
ENSMUSG00000116840	Gm21691	predicted gene, 21691	-2.98444	1
ENSMUSG00000027380	Acoxl	acyl-Coenzyme A oxidase-like	-2.98407	0.13198
ENSMUSG00000098233	Gm26954	predicted gene, 26954	-2.98277	1
ENSMUSG00000090248	Gm14027	predicted gene 14027	-2.98127	1
ENSMUSG00000079311	Gm3222	predicted pseudogene 3222	-2.97865	1
ENSMUSG00000001739	Cldn15	claudin 15	-2.97828	1
ENSMUSG00000105558	Gm5855	predicted gene 5855	-2.97816	1
ENSMUSG00000062224	4933411G06Rik	RIKEN cDNA 4933411G06 gene	-2.978	1
ENSMUSG00000084249	Gm12267	predicted gene 12267	-2.978	1
ENSMUSG00000083924	Gm12304	predicted gene 12304	-2.978	1
ENSMUSG00000113478	Gm18405	predicted gene, 18405	-2.978	1
ENSMUSG00000031027	Stk33	serine/threonine kinase 33	-2.978	1
ENSMUSG00000031481	Tpte	transmembrane phosphatase with tensin homology	-2.978	1
ENSMUSG00000034151	Zbbx	zinc finger, B-box domain containing	-2.978	1
ENSMUSG00000120358	ENSMUSG00000120358	novel transcript	-2.9773	0.115294
ENSMUSG00000085627	Gm11222	predicted gene 11222	-2.97636	1
ENSMUSG00000107853	Gm18584	predicted gene, 18584	-2.97625	1
ENSMUSG00000020902	Ntn1	netrin 1	-2.9754	1
ENSMUSG00000082321	Gm14253	predicted gene 14253	-2.97456	0.0128559
ENSMUSG00000042360	4930433N12Rik	RIKEN cDNA 4930433N12 gene	-2.97408	1
ENSMUSG00000062074	Ccn6	cellular communication network factor 6	-2.97408	1
ENSMUSG00000034520	Gjc1	gap junction protein, gamma 1	-2.97408	1
ENSMUSG00000105798	Gm18982	predicted gene, 18982	-2.97408	1
ENSMUSG00000110950	Gm39384	predicted gene, 39384	-2.97408	1
ENSMUSG00000111539	Gm48372	predicted gene, 48372	-2.97408	1
ENSMUSG00000098006	Gm8565	predicted gene 8565	-2.97408	1
ENSMUSG00000073940	Hbb-bt	hemoglobin, beta adult t chain	-2.97408	1
ENSMUSG00000014361	Mertk	MER proto-oncogene tyrosine kinase	-2.97408	1
ENSMUSG00000049353	Rd3	retinal degeneration 3	-2.97408	1
ENSMUSG00000076752	Trgc2	T cell receptor gamma, constant 2	-2.97408	1
ENSMUSG00000068262	Gm5879	predicted gene 5879	-2.97352	1
ENSMUSG00000048163	Selplg	selectin, platelet (p-selectin) ligand	-2.97218	1
ENSMUSG00000106558	Gm5552	predicted gene 5552	-2.96634	1
ENSMUSG00000097259	Gm26766	predicted gene, 26766	-2.96467	1
ENSMUSG00000022504	Ciita	class II transactivator	-2.96446	1
ENSMUSG00000117049	Gm6540	predicted gene 6540	-2.95963	1
ENSMUSG00000044285	Ubb-ps	ubiquitin B, pseudogene	-2.95778	1.74353e-168
ENSMUSG00000084379	Gm12957	predicted gene 12957	-2.95645	1
ENSMUSG00000082087	Gm12138	predicted gene 12138	-2.9553	0.0588091
ENSMUSG00000094989	Rpl9-ps4	ribosomal protein L9, pseudogene 4	-2.95497	1
ENSMUSG00000106120	Gm42697	predicted gene 42697	-2.95388	1
ENSMUSG00000083551	Gm14516	predicted gene 14516	-2.95327	1
ENSMUSG00000086600	C030005K06Rik	RIKEN cDNA C030005K06 gene	-2.95308	1
ENSMUSG00000004665	Cnn2	calponin 2	-2.9524	0.395268
ENSMUSG00000096001	2610528A11Rik	RIKEN cDNA 2610528A11 gene	-2.95081	1
ENSMUSG00000083044	Gm12416	predicted gene 12416	-2.94076	1
ENSMUSG00000084098	Gm13422	predicted gene 13422	-2.93638	1
ENSMUSG00000100018	Gm7776	predicted gene 7776	-2.93431	1
ENSMUSG00000016283	H2-M2	histocompatibility 2, M region locus 2	-2.93314	1
ENSMUSG00000104913	Gm6560	predicted gene 6560	-2.92845	2.17922e-09
ENSMUSG00000071867	Mrpl27-ps	mitochondrial ribosomal protein L27, pseudogene	-2.92758	1
ENSMUSG00000029646	Cdx2	caudal type homeobox 2	-2.92714	1
ENSMUSG00000089737	Gm15688	predicted gene 15688	-2.92667	1
ENSMUSG00000113743	Gm8712	predicted gene 8712	-2.91933	1
ENSMUSG00000120541	ENSMUSG00000120541	novel transcript	-2.91913	1
ENSMUSG00000084329	Gm6733	predicted gene 6733	-2.91842	3.15688e-10
ENSMUSG00000114349	Gm7591	predicted gene 7591	-2.918	1
ENSMUSG00000099902	Gm12115	predicted gene 12115	-2.91785	1
ENSMUSG00000082154	Gm16464	predicted gene 16464	-2.91664	1
ENSMUSG00000094185	Gm5445	predicted gene 5445	-2.9154	1
ENSMUSG00000097831	4930540M05Rik	RIKEN cDNA 4930540M05 gene	-2.91287	1
ENSMUSG00000106475	Gm43011	predicted gene 43011	-2.9125	1
ENSMUSG00000112909	Gm10120	predicted gene 10120	-2.90982	1
ENSMUSG00000076316	Mir673	microRNA 673	-2.90914	1
ENSMUSG00000112459	Gm47689	predicted gene, 47689	-2.90866	1
ENSMUSG00000082494	Gm13687	predicted gene 13687	-2.90854	1
ENSMUSG00000097415	AU020206	expressed sequence AU020206	-2.90526	1
ENSMUSG00000101345	Gm28195	predicted gene 28195	-2.90038	1
ENSMUSG00000062353	Gm15772	predicted gene 15772	-2.90008	0.0129733
ENSMUSG00000008129	Brme1	break repair meiotic recombinase recruitment factor 1	-2.89897	1
ENSMUSG00000107563	4930587E11Rik	RIKEN cDNA 4930587E11 gene	-2.89865	1
ENSMUSG00000103285	Gm37274	predicted gene, 37274	-2.8959	1
ENSMUSG00000029299	Abcg3	ATP binding cassette subfamily G member 3	-2.89251	0.604979
ENSMUSG00000052154	Gm9870	predicted gene 9870	-2.89186	0.425397
ENSMUSG00000070343	Gm10288	predicted gene 10288	-2.8917	0.130487
ENSMUSG00000078183	Gm15610	predicted gene 15610	-2.89086	1
ENSMUSG00000103380	Gm37756	predicted gene, 37756	-2.89059	1
ENSMUSG00000081729	Hspa9-ps1	heat shock protein 9, pseudogene 1	-2.88796	1
ENSMUSG00000084106	Gm6136	predicted pseudogene 6136	-2.8875	3.09208e-06
ENSMUSG00000053038	Gm6180	predicted pseudogene 6180	-2.88566	0.0312311
ENSMUSG00000082455	Gm13665	predicted gene 13665	-2.88285	1
ENSMUSG00000115280	Gm7107	predicted gene 7107	-2.88271	1
ENSMUSG00000085124	Gm12766	predicted gene 12766	-2.88258	1
ENSMUSG00000087119	Atg4a-ps	autophagy related 4A, pseudogene	-2.87717	1
ENSMUSG00000117860	Gm30018	predicted gene, 30018	-2.87656	1
ENSMUSG00000072789	Gm10420	predicted gene 10420	-2.87369	1
ENSMUSG00000120684	ENSMUSG00000120684	novel transcript	-2.87165	0.0138873
ENSMUSG00000106421	Gm9645	predicted gene 9645	-2.86772	1
ENSMUSG00000024907	Gal	galanin and GMAP prepropeptide	-2.86578	0.460125
ENSMUSG00000074004	B3gnt6	UDP-GlcNAc:betaGal beta-1,3-N-acetylglucosaminyltransferase 6 (core 3 synthase)	-2.8634	1
ENSMUSG00000076433	Cep295nl	CEP295 N-terminal like	-2.8634	1
ENSMUSG00000095975	Cphx1	cytoplasmic polyadenylated homeobox 1	-2.8634	1
ENSMUSG00000010476	Ebf3	early B cell factor 3	-2.8634	1
ENSMUSG00000103165	Gm37560	predicted gene, 37560	-2.8634	1
ENSMUSG00000117653	Gm50009	predicted gene, 50009	-2.8634	1
ENSMUSG00000018654	Ikzf1	IKAROS family zinc finger 1	-2.8634	1
ENSMUSG00000085762	Lrrc75aos2	leucine rich repeat containing 75A, opposite strand 2	-2.8634	1
ENSMUSG00000043192	Gpi-ps	glucose-6-phosphate isomerase, pseudogene	-2.86197	0.0148816
ENSMUSG00000091587	Gm17191	predicted gene 17191	-2.8615	1
ENSMUSG00000044749	Abca6	ATP-binding cassette, sub-family A (ABC1), member 6	-2.85819	1
ENSMUSG00000086719	Gm16275	predicted gene 16275	-2.85767	1
ENSMUSG00000117278	Gm36684	predicted gene, 36684	-2.85682	1
ENSMUSG00000050900	Gm7327	predicted gene 7327	-2.85108	0.00780643
ENSMUSG00000103613	Gm34882	predicted gene, 34882	-2.8503	1
ENSMUSG00000032420	Nt5e	5' nucleotidase, ecto	-2.84966	0.647346
ENSMUSG00000091876	Gm3851	predicted gene 3851	-2.84747	1
ENSMUSG00000120588	ENSMUSG00000120588	novel transcript	-2.84223	1
ENSMUSG00000111947	Gm47438	predicted gene, 47438	-2.84184	0.0747367
ENSMUSG00000106524	Gm42706	predicted gene 42706	-2.83815	1
ENSMUSG00000046186	Cd109	CD109 antigen	-2.83717	1
ENSMUSG00000096553	Gm10097	predicted gene 10097	-2.83717	1
ENSMUSG00000103349	Gm36888	predicted gene, 36888	-2.83717	1
ENSMUSG00000115742	Gm48950	predicted gene, 48950	-2.83717	1
ENSMUSG00000071311	Gpr31b	G protein-coupled receptor 31, D17Leh66b region	-2.83717	1
ENSMUSG00000015437	Gzmb	granzyme B	-2.83717	1
ENSMUSG00000058922	Gm10052	predicted pseudogene 10052	-2.83032	1
ENSMUSG00000108825	Gm45838	predicted gene 45838	-2.82576	1
ENSMUSG00000112414	Gm34609	predicted gene, 34609	-2.82033	1
ENSMUSG00000042453	Reln	reelin	-2.81153	0.235338
ENSMUSG00000055044	Pdlim1	PDZ and LIM domain 1 (elfin)	-2.81114	0.212377
ENSMUSG00000120076	ENSMUSG00000120076	novel transcript	-2.8104	1
ENSMUSG00000105529	Gm9480	predicted gene 9480	-2.80806	1
ENSMUSG00000094257	Ap3s1-ps2	adaptor-related protein complex 3, sigma 1 subunit, pseudogene 2	-2.80462	0.0427157
ENSMUSG00000095597	Rps7-ps3	ribosomal protein S7, pseudogene 3	-2.79744	0.0332073
ENSMUSG00000042540	Acot5	acyl-CoA thioesterase 5	-2.7974	1
ENSMUSG00000094090	Gm8494	predicted gene 8494	-2.79416	1
ENSMUSG00000105928	Gm9256	predicted gene 9256	-2.79233	1
ENSMUSG00000113555	Gm10095	predicted gene 10095	-2.79198	0.0001612
ENSMUSG00000055172	C1ra	complement component 1, r subcomponent A	-2.79172	0.432272
ENSMUSG00000006345	Ggt1	gamma-glutamyltransferase 1	-2.78764	0.537332
ENSMUSG00000097790	Gm16399	predicted pseudogene 16399	-2.78565	0.163319
ENSMUSG00000100347	Gm7895	predicted gene 7895	-2.785	3.77773e-07
ENSMUSG00000110636	Gm39397	predicted gene, 39397	-2.78329	1
ENSMUSG00000030897	Cnga4	cyclic nucleotide gated channel alpha 4	-2.78235	0.445887
ENSMUSG00000103984	Gm37447	predicted gene, 37447	-2.78194	1
ENSMUSG00000000732	Icosl	icos ligand	-2.78183	0.535578
ENSMUSG00000103343	Gm37052	predicted gene, 37052	-2.78167	0.555535
ENSMUSG00000117046	Gm19183	predicted gene, 19183	-2.78065	0.432234
ENSMUSG00000047509	Gm6776	predicted pseudogene 6776	-2.7799	1
ENSMUSG00000106859	Gm42737	predicted gene 42737	-2.77771	1
ENSMUSG00000095078	Gm5866	predicted gene 5866	-2.77724	1
ENSMUSG00000112547	Gm47096	predicted gene, 47096	-2.77471	0.0913658
ENSMUSG00000075272	Ttc30a2	tetratricopeptide repeat domain 30A2	-2.7734	0.34291
ENSMUSG00000062372	Otof	otoferlin	-2.76873	0.413535
ENSMUSG00000023078	Cxcl13	chemokine (C-X-C motif) ligand 13	-2.76628	1
ENSMUSG00000060572	Mfap2	microfibrillar-associated protein 2	-2.76539	0.00369845
ENSMUSG00000084230	Gm14388	predicted gene 14388	-2.7632	1
ENSMUSG00000021539	Lect2	leukocyte cell-derived chemotaxin 2	-2.76198	1
ENSMUSG00000119838	Gm23444	predicted gene, 23444	-2.76066	1
ENSMUSG00000099377	Gm6159	predicted gene 6159	-2.76059	1
ENSMUSG00000087386	Gm15637	predicted gene 15637	-2.75991	1
ENSMUSG00000098019	Gm2546	predicted gene 2546	-2.75889	1
ENSMUSG00000106755	Tpi-rs11	triosephosphate isomerase related sequence 11	-2.75416	1
ENSMUSG00000116958	Gm6705	predicted gene 6705	-2.75351	1
ENSMUSG00002076173	Gm55118	predicted gene, 55118	-2.74703	0.00734028
ENSMUSG00000104891	2510017J16Rik	RIKEN cDNA 2510017J16 gene	-2.74551	1
ENSMUSG00000094685	Gm5900	predicted pseudogene 5900	-2.74508	0.165305
ENSMUSG00000096361	Gm5814	predicted pseudogene 5814	-2.7406	0.000584866
ENSMUSG00000121069	ENSMUSG00000121069	novel transcript	-2.7379	1
ENSMUSG00000115160	Gm6532	predicted pseudogene 6532	-2.7361	0.193781
ENSMUSG00000116972	Gm6278	predicted gene 6278	-2.73291	1
ENSMUSG00000119892	Gm23971	predicted gene, 23971	-2.73182	0.14651
ENSMUSG00000120131	ENSMUSG00000120131	novel transcript	-2.7302	1
ENSMUSG00000105459	4930449I04Rik	RIKEN cDNA 4930449I04 gene	-2.7258	1
ENSMUSG00000078134	Srsf3-ps	serine and arginine rich splicing factor 3, pseudogene	-2.7238	1
ENSMUSG00000104496	Gm5837	predicted gene 5837	-2.72272	1
ENSMUSG00000036211	H1f6	H1.6 linker histone, cluster member	-2.72039	1
ENSMUSG00000048087	Ahcyl	adenosylhomocysteinase like	-2.71708	1
ENSMUSG00000083754	Gm7803	predicted gene 7803	-2.70916	1
ENSMUSG00000051498	Tlr6	toll-like receptor 6	-2.70859	0.247819
ENSMUSG00000080875	Gm7332	predicted gene 7332	-2.70628	0.26262
ENSMUSG00000120529	ENSMUSG00000120529	novel transcript	-2.7019	1
ENSMUSG00000108122	Gm44116	predicted gene, 44116	-2.70087	1
ENSMUSG00000103953	Gm29718	predicted gene, 29718	-2.69729	1
ENSMUSG00002074846	Vaultrc5	vault RNA component 5	-2.69456	1
ENSMUSG00000103646	Gm37706	predicted gene, 37706	-2.69446	1
ENSMUSG00000002565	Scin	scinderin	-2.68265	0.302529
ENSMUSG00000037440	Vnn1	vanin 1	-2.67954	0.539488
ENSMUSG00000097331	F420014N23Rik	RIKEN cDNA F420014N23 gene	-2.67272	1
ENSMUSG00000120271	ENSMUSG00000120271	novel transcript, antisense to KO:Shq1and Shq1	-2.66799	1
ENSMUSG00000105879	Gm6204	predicted gene 6204	-2.66771	1
ENSMUSG00000099471	Gm8451	predicted gene 8451	-2.66714	1
ENSMUSG00000044757	Gm6430	predicted gene 6430	-2.66526	1
ENSMUSG00000107336	Gm43461	predicted gene 43461	-2.65937	1
ENSMUSG00000087601	Uchl1os	ubiquitin carboxy-terminal hydrolase L1, opposite strand	-2.6592	1
ENSMUSG00000099858	Gm6652	predicted gene 6652	-2.65328	1
ENSMUSG00000113463	4930520P13Rik	RIKEN cDNA 4930520P13 gene	-2.64549	1
ENSMUSG00000115418	Gm49296	predicted gene, 49296	-2.64538	1
ENSMUSG00000115637	Gm30970	predicted gene, 30970	-2.64482	1
ENSMUSG00000118653	Gm2296	predicted gene 2296	-2.64332	0.031401
ENSMUSG00000024842	Cabp4	calcium binding protein 4	-2.64054	1
ENSMUSG00000116704	Gm5491	predicted gene 5491	-2.63971	1
ENSMUSG00000082454	Gm12183	predicted gene 12183	-2.639	0.0221938
ENSMUSG00000102157	Gm37470	predicted gene, 37470	-2.63607	1
ENSMUSG00000041544	Disp3	dispatched RND transporter family member 3	-2.6344	0.475058
ENSMUSG00000059033	Rpl18a-ps1	ribosomal protein L18A, pseudogene 1	-2.63434	1
ENSMUSG00000105081	Gm43110	predicted gene 43110	-2.63388	1
ENSMUSG00000081600	Gm12286	predicted gene 12286	-2.63271	1
ENSMUSG00000117822	Eef1a1-ps1	eukaryotic translation elongation factor 1 alpha 1, pseudogene 1	-2.62813	0.0386544
ENSMUSG00000087114	Gm16099	predicted gene 16099	-2.62739	1
ENSMUSG00000041731	Pgm5	phosphoglucomutase 5	-2.62581	0.496989
ENSMUSG00000034792	Gna15	guanine nucleotide binding protein, alpha 15	-2.62509	0.164463
ENSMUSG00000094219	Calhm3	calcium homeostasis modulator 3	-2.62498	1
ENSMUSG00000070576	Mn1	meningioma 1	-2.62451	0.492929
ENSMUSG00000058581	Gm5801	predicted pseudogene 5801	-2.61916	1
ENSMUSG00000067719	Gm10221	predicted gene 10221	-2.61595	8.59224e-09
ENSMUSG00000088583	Gm22965	predicted gene, 22965	-2.61587	1
ENSMUSG00000082185	Gm12428	predicted gene 12428	-2.61528	1
ENSMUSG00000068200	Gm5931	predicted pseudogene 5931	-2.61311	1
ENSMUSG00000038496	Slc19a3	solute carrier family 19, member 3	-2.6124	0.476713
ENSMUSG00000091572	Vmn2r3	vomeronasal 2, receptor 3	-2.61111	0.428941
ENSMUSG00000120855	ENSMUSG00000120855	novel transcript	-2.60318	1
ENSMUSG00000115405	Gm41307	predicted gene, 41307	-2.60164	1
ENSMUSG00000051079	Rgs13	regulator of G-protein signaling 13	-2.59871	1
ENSMUSG00000080777	Gm15365	predicted gene 15365	-2.59741	1
ENSMUSG00000071041	Impdh2-ps	inosine monophosphate dehydrogenase 2, pseudogene	-2.59452	0.19446
ENSMUSG00000105143	Gm8069	predicted pseudogene 8069	-2.59107	1
ENSMUSG00000027762	Sucnr1	succinate receptor 1	-2.59034	0.25621
ENSMUSG00000072978	Gm5830	predicted pseudogene 5830	-2.59031	1
ENSMUSG00000036905	C1qb	complement component 1, q subcomponent, beta polypeptide	-2.58949	0.0256118
ENSMUSG00000102466	Gm38200	predicted gene, 38200	-2.58882	0.326129
ENSMUSG00000100410	2310020H05Rik	RIKEN cDNA 2310020H05 gene	-2.5859	1
ENSMUSG00000032889	Gm6685	predicted pseudogene 6685	-2.58549	1
ENSMUSG00000108506	Gm44705	predicted gene 44705	-2.58542	1
ENSMUSG00000070025	Gm10284	predicted pseudogene 10284	-2.58522	1
ENSMUSG00000099050	Mir7655	microRNA 7655	-2.58155	1
ENSMUSG00000110679	Rpl10-ps5	ribosomal protein L10, pseudogene 5	-2.58131	1
ENSMUSG00000099647	Gm5776	predicted gene 5776	-2.58077	0.0239672
ENSMUSG00000112532	Gm36283	predicted gene, 36283	-2.57879	1
ENSMUSG00000109495	Gm47692	predicted gene, 47692	-2.57837	1
ENSMUSG00000054435	Gimap4	GTPase, IMAP family member 4	-2.57772	1
ENSMUSG00000071113	Mboat4	membrane bound O-acyltransferase domain containing 4	-2.57645	1
ENSMUSG00000045455	Gm9797	predicted pseudogene 9797	-2.57058	1
ENSMUSG00000054822	1700041G16Rik	RIKEN cDNA 1700041G16 gene	-2.56833	0.291587
ENSMUSG00000105894	Gm42710	predicted gene 42710	-2.56317	1
ENSMUSG00000086119	Gm2415	predicted gene 2415	-2.56268	1
ENSMUSG00000084139	Gm12322	predicted gene 12322	-2.56216	1
ENSMUSG00000078903	Gm14391	predicted gene 14391	-2.56032	1
ENSMUSG00000085991	Gm11479	predicted gene 11479	-2.55746	1
ENSMUSG00000103945	Gm38228	predicted gene, 38228	-2.55649	1
ENSMUSG00000051022	Hs3st1	heparan sulfate (glucosamine) 3-O-sulfotransferase 1	-2.55553	0.226391
ENSMUSG00000086691	Gm15432	predicted gene 15432	-2.55535	1
ENSMUSG00000106492	Gm29707	predicted gene, 29707	-2.55291	1
ENSMUSG00000074619	Fundc2b	FUN14 domain containing 2B	-2.5495	1
ENSMUSG00000026874	Hc	hemolytic complement	-2.5495	1
ENSMUSG00000036551	Akap14	A kinase (PRKA) anchor protein 14	-2.54844	1
ENSMUSG00000087083	Gm15083	predicted gene 15083	-2.54379	1
ENSMUSG00000034839	Larp6	La ribonucleoprotein 6, translational regulator	-2.53956	0.502057
ENSMUSG00000006219	Fblim1	filamin binding LIM protein 1	-2.53758	1
ENSMUSG00000068120	Gm10231	predicted pseudogene 10231	-2.53744	1
ENSMUSG00000047730	Fcgbp	Fc fragment of IgG binding protein	-2.5371	0.458258
ENSMUSG00000102282	A930032L01Rik	RIKEN cDNA A930032L01 gene	-2.5357	1
ENSMUSG00000027718	Il21	interleukin 21	-2.53384	0.439816
ENSMUSG00000062038	Gm10108	predicted pseudogene 10108	-2.53373	1
ENSMUSG00000121088	ENSMUSG00000121088	novel transcript, sense intronic to Szrd1	-2.53286	1
ENSMUSG00000055159	4930583K01Rik	RIKEN cDNA 4930583K01 gene	-2.53233	0.126283
ENSMUSG00000045065	9930022D16Rik	RIKEN cDNA 9930022D16 gene	-2.53179	1
ENSMUSG00000111195	Gm48215	predicted gene, 48215	-2.52897	1
ENSMUSG00000120460	ENSMUSG00000120460	novel transcript	-2.5277	0.498695
ENSMUSG00000082675	Gm6382	predicted gene 6382	-2.52494	0.0775471
ENSMUSG00000108494	Gm45203	predicted gene 45203	-2.52423	0.251985
ENSMUSG00000093826	Gm6900	predicted gene 6900	-2.52414	0.127962
ENSMUSG00000089983	2010320O07Rik	RIKEN cDNA 2010320O07 gene	-2.52407	1
ENSMUSG00000050550	Gm11868	predicted gene 11868	-2.52386	0.0577237
ENSMUSG00000097685	Gm26646	predicted gene, 26646	-2.52245	1
ENSMUSG00000116056	Gm4544	predicted gene 4544	-2.52166	0.390872
ENSMUSG00000046814	Gchfr	GTP cyclohydrolase I feedback regulator	-2.51779	0.0960391
ENSMUSG00000114511	0710001A04Rik	RIKEN cDNA 0710001A04 gene	-2.5173	1
ENSMUSG00000117875	Gm6789	predicted gene 6789	-2.51368	0.0227938
ENSMUSG00000066807	Gm10179	predicted gene 10179	-2.51297	1
ENSMUSG00000114003	Gm9616	predicted gene 9616	-2.51139	1
ENSMUSG00000113355	Gm48888	predicted gene, 48888	-2.50816	1
ENSMUSG00000032172	Olfm2	olfactomedin 2	-2.50658	0.128257
ENSMUSG00000112096	A430103D13Rik	RIKEN cDNA A430103D13 gene	-2.50605	1
ENSMUSG00000120478	ENSMUSG00000120478	novel transcript	-2.5055	1
ENSMUSG00000111365	Gm47772	predicted gene, 47772	-2.50518	1
ENSMUSG00000117957	Gm50334	predicted gene, 50334	-2.50484	1
ENSMUSG00000080700	Gm15981	predicted gene 15981	-2.50177	1
ENSMUSG00000117637	Gm30091	predicted gene, 30091	-2.49726	0.185651
ENSMUSG00000087347	1700047K16Rik	RIKEN cDNA 1700047K16 gene	-2.49637	0.122667
ENSMUSG00000066170	E230001N04Rik	RIKEN cDNA E230001N04 gene	-2.49584	0.0102253
ENSMUSG00000043557	Mdga1	MAM domain containing glycosylphosphatidylinositol anchor 1	-2.48285	1
ENSMUSG00000107286	Gm43788	predicted gene 43788	-2.47845	1
ENSMUSG00000107509	Gm44941	predicted gene 44941	-2.47713	1
ENSMUSG00000081137	BC022960	cDNA sequence BC022960	-2.47543	0.183122
ENSMUSG00000083443	Gm15519	predicted gene 15519	-2.4723	0.113271
ENSMUSG00000091421	Gm4202	predicted gene 4202	-2.46965	7.95858e-17
ENSMUSG00000104923	Gm5865	predicted gene 5865	-2.46893	0.0446821
ENSMUSG00000001943	Vsig2	V-set and immunoglobulin domain containing 2	-2.46704	0.532482
ENSMUSG00000097745	AI115009	expressed sequence AI115009	-2.46625	1
ENSMUSG00000103506	Gm38376	predicted gene, 38376	-2.45815	1
ENSMUSG00002075338	Gm55606	predicted gene, 55606	-2.45571	1
ENSMUSG00002074988	Gm56101	predicted gene, 56101	-2.45558	0.374149
ENSMUSG00000073060	Zxda	zinc finger, X-linked, duplicated A	-2.45402	0.00614616
ENSMUSG00000110702	Gm45767	predicted gene 45767	-2.45401	1
ENSMUSG00000096173	Gm3150	predicted gene 3150	-2.45203	1
ENSMUSG00000097322	A530083I20Rik	RIKEN cDNA A530083I20 gene	-2.45116	1
ENSMUSG00000073052	D130052B06Rik	RIKEN cDNA D130052B06 gene	-2.44978	1
ENSMUSG00000102673	Gm37437	predicted gene, 37437	-2.4494	1
ENSMUSG00000097848	Gm807	predicted gene 807	-2.44575	0.611096
ENSMUSG00000087938	Gm26049	predicted gene, 26049	-2.44562	1
ENSMUSG00000083261	Gm7816	predicted pseudogene 7816	-2.43702	0.147769
ENSMUSG00000032087	Dscaml1	DS cell adhesion molecule like 1	-2.43547	0.676493
ENSMUSG00000062209	Erbb4	erb-b2 receptor tyrosine kinase 4	-2.43393	1
ENSMUSG00000070490	Gm10293	predicted pseudogene 10293	-2.43235	0.131432
ENSMUSG00000116626	Gm49705	predicted gene, 49705	-2.4305	1
ENSMUSG00000120486	ENSMUSG00000120486	novel transcript	-2.42497	1
ENSMUSG00000114384	4930455J16Rik	RIKEN cDNA 4930455J16 gene	-2.42218	1
ENSMUSG00000117440	Gm50087	predicted gene, 50087	-2.42165	1
ENSMUSG00000041119	Pde9a	phosphodiesterase 9A	-2.42165	1
ENSMUSG00000025161	Slc16a3	solute carrier family 16 (monocarboxylic acid transporters), member 3	-2.42165	1
ENSMUSG00000120342	ENSMUSG00000120342	novel transcript	-2.42044	1
ENSMUSG00000081999	Gm13461	predicted gene 13461	-2.41984	0.0663384
ENSMUSG00000112550	Gm6627	predicted gene 6627	-2.41959	0.190326
ENSMUSG00000019577	Pdk4	pyruvate dehydrogenase kinase, isoenzyme 4	-2.41608	0.544395
ENSMUSG00000112824	Gm47917	predicted gene, 47917	-2.41508	1
ENSMUSG00000078592	Gm4609	predicted gene 4609	-2.41481	0.0302659
ENSMUSG00000079259	Trim71	tripartite motif-containing 71	-2.4119	1
ENSMUSG00000032374	Plod2	procollagen lysine, 2-oxoglutarate 5-dioxygenase 2	-2.41154	0.147699
ENSMUSG00000063684	Hadhb-ps	hydroxyacyl-CoA dehydrogenase trifunctional multienzyme complex subunit beta, pseudogene	-2.40888	3.17174e-06
ENSMUSG00000121266	ENSMUSG00000121266	novel transcript	-2.40839	1
ENSMUSG00000070691	Runx3	runt related transcription factor 3	-2.40268	1
ENSMUSG00000105404	Gm42807	predicted gene 42807	-2.40217	1
ENSMUSG00000098678	Mroh6	maestro heat-like repeat family member 6	-2.40186	1
ENSMUSG00000026354	Lct	lactase	-2.40135	1
ENSMUSG00000057762	Gm6169	predicted gene 6169	-2.39884	0.155724
ENSMUSG00000051116	Gm8121	predicted pseudogene 8121	-2.39879	0.000455986
ENSMUSG00000109600	Gm18212	predicted gene, 18212	-2.39821	1
ENSMUSG00000121384	ENSMUSG00000121384	novel transcript	-2.39772	1
ENSMUSG00000086850	Gm13257	predicted gene 13257	-2.39701	1
ENSMUSG00000098104	Gm6085	predicted gene 6085	-2.39612	1
ENSMUSG00000045048	Gm9795	predicted pseudogene 9795	-2.3958	1
ENSMUSG00000091845	Rpl36-ps12	ribosomal protein L36, pseudogene 12	-2.39553	1
ENSMUSG00000102451	Gm37655	predicted gene, 37655	-2.39486	1
ENSMUSG00000053049	Gm15413	predicted gene 15413	-2.39483	1
ENSMUSG00000097709	2810429I04Rik	RIKEN cDNA 2810429I04 gene	-2.39243	1
ENSMUSG00000109418	Gm44800	predicted gene 44800	-2.39113	1
ENSMUSG00000094973	Eif4a3l1	eukaryotic translation initiation factor 4A3 like 1	-2.39012	1
ENSMUSG00000112332	4930466K18Rik	RIKEN cDNA 4930466K18 gene	-2.38927	0.234745
ENSMUSG00000112677	Gm48868	predicted gene, 48868	-2.38555	1
ENSMUSG00000006538	Ihh	Indian hedgehog	-2.38555	1
ENSMUSG00000031849	Comp	cartilage oligomeric matrix protein	-2.38486	0.635879
ENSMUSG00000104966	Gm43273	predicted gene 43273	-2.38452	1
ENSMUSG00000058542	Gm15590	predicted gene 15590	-2.38408	0.00655002
ENSMUSG00000110867	Gm7368	predicted gene 7368	-2.38348	1
ENSMUSG00000073198	Bnip3l-ps	BCL2/adenovirus E1B interacting protein 3-like, pseudogene	-2.38346	0.00192539
ENSMUSG00000028524	Sgip1	SH3-domain GRB2-like (endophilin) interacting protein 1	-2.38255	0.0617722
ENSMUSG00000109719	Gm45266	predicted gene 45266	-2.3822	1
ENSMUSG00000086154	Gm16196	predicted gene 16196	-2.38177	0.122017
ENSMUSG00000104034	2900092N22Rik	RIKEN cDNA 2900092N22 gene	-2.3785	1
ENSMUSG00000037266	Rsrp1	arginine/serine rich protein 1	-2.37806	4.71697e-05
ENSMUSG00000020000	Moxd1	monooxygenase, DBH-like 1	-2.37659	0.048696
ENSMUSG00000114306	Gm3227	predicted gene 3227	-2.37621	0.197885
ENSMUSG00000083692	Gm9575	predicted gene 9575	-2.37526	1
ENSMUSG00000120520	ENSMUSG00000120520	novel transcript	-2.37176	1
ENSMUSG00000097979	Gm4691	predicted gene 4691	-2.37008	0.123643
ENSMUSG00000086749	Gm12037	predicted gene 12037	-2.36948	1
ENSMUSG00000047021	Cfap65	cilia and flagella associated protein 65	-2.36863	1
ENSMUSG00000087412	Gm15501	predicted pseudogene 15501	-2.36834	0.0136127
ENSMUSG00000005397	Nid1	nidogen 1	-2.368	0.69635
ENSMUSG00000082806	Rpl13-ps1	ribosomal protein L13, pseudogene 1	-2.36525	0.132143
ENSMUSG00000081792	Anp32b-ps1	Bacidic (leucine-rich) nuclear phosphoprotein 32 family, member B, pseudogene 1	-2.36161	1
ENSMUSG00000120648	ENSMUSG00000120648	novel transcript	-2.36134	1
ENSMUSG00000087701	Gm13493	predicted gene 13493	-2.35896	2.04989e-09
ENSMUSG00000113810	Gm48259	predicted gene, 48259	-2.35894	1
ENSMUSG00000121223	ENSMUSG00000121223		-2.35565	1
ENSMUSG00000086034	Gm15201	predicted gene 15201	-2.35458	0.419629
ENSMUSG00000120593	ENSMUSG00000120593	novel transcript	-2.35265	1
ENSMUSG00000068794	Col28a1	collagen, type XXVIII, alpha 1	-2.35027	0.243123
ENSMUSG00000082319	Actr3-ps	actin related protein 3, pseudogene	-2.34824	0.000577278
ENSMUSG00000092072	Gm4540	predicted gene 4540	-2.34794	0.153091
ENSMUSG00000066809	Gm10180	predicted gene 10180	-2.34707	0.141996
ENSMUSG00000086493	Gm12204	predicted gene 12204	-2.34612	1
ENSMUSG00000083829	Gm2199	predicted gene 2199	-2.34552	1
ENSMUSG00000080896	Gm14567	predicted gene 14567	-2.3449	1
ENSMUSG00000086436	Gm13690	predicted gene 13690	-2.34155	1
ENSMUSG00000095588	Gm12350	predicted gene 12350	-2.33988	0.0013595
ENSMUSG00000091989	Ndufab1-ps	NADH:ubiquinone oxidoreductase subunit AB1b	-2.3351	1
ENSMUSG00000008734	Gprc5b	G protein-coupled receptor, family C, group 5, member B	-2.33488	0.532648
ENSMUSG00000050490	Psma5-ps	proteasome subunit alpha 5, pseudogene	-2.33473	0.175769
ENSMUSG00000070527	Mkrn3	makorin, ring finger protein, 3	-2.33309	0.442067
ENSMUSG00000111686	Rab7-ps1	RAB7, member RAS oncogene family, pseudogene 1	-2.32924	0.0201354
ENSMUSG00000029050	Ski	ski sarcoma viral oncogene homolog (avian)	-2.32916	5.57922e-55
ENSMUSG00000036912	Piwil4	piwi-like RNA-mediated gene silencing 4	-2.32678	1
ENSMUSG00000066438	Plekhd1	pleckstrin homology domain containing, family D (with coiled-coil domains) member 1	-2.32571	1
ENSMUSG00000020101	Vsir	V-set immunoregulatory receptor	-2.32571	1
ENSMUSG00000048120	Entpd1	ectonucleoside triphosphate diphosphohydrolase 1	-2.32439	0.277119
ENSMUSG00000106831	Ube2n-ps1	ubiquitin-conjugating enzyme E2N, pseudogene 1	-2.32096	0.037357
ENSMUSG00000107155	Gm43793	predicted gene 43793	-2.31878	1
ENSMUSG00000116875	Morf4l1-ps1	mortality factor 4 like 1, pseudogene 1	-2.31831	3.078e-07
ENSMUSG00000086837	Gm16618	predicted gene, 16618	-2.31614	1
ENSMUSG00000021414	Fam217a	family with sequence similarity 217, member A	-2.31577	0.520665
ENSMUSG00000120681	ENSMUSG00000120681	novel transcript, antisense to Ppt2	-2.3156	1
ENSMUSG00000032680	6820408C15Rik	RIKEN cDNA 6820408C15 gene	-2.31242	1
ENSMUSG00000082741	Gm9703	predicted gene 9703	-2.31105	1
ENSMUSG00000102070	Gm28661	predicted gene 28661	-2.30331	1.37016e-16
ENSMUSG00000107576	Gm44093	predicted gene, 44093	-2.30288	1
ENSMUSG00000106988	Tsg101-ps	tumor susceptibility gene 101, pseudogene	-2.30105	0.0292751
ENSMUSG00000091697	Eif3s6-ps2	eukaryotic translation initiation factor 3, subunit 6, pseudogene 2	-2.29991	1
ENSMUSG00000121160	ENSMUSG00000121160	novel transcript, antisense to Scn3a	-2.29912	1
ENSMUSG00000101330	Gm10193	predicted gene 10193	-2.29912	1
ENSMUSG00000039194	Rlbp1	retinaldehyde binding protein 1	-2.29855	1
ENSMUSG00000086240	Gm7846	predicted gene 7846	-2.29683	0.117755
ENSMUSG00000078190	Dnm3os	dynamin 3, opposite strand	-2.29174	1
ENSMUSG00000103847	Gm20056	predicted gene, 20056	-2.28886	1
ENSMUSG00000104374	Gm37517	predicted gene, 37517	-2.28728	1
ENSMUSG00000097953	Gm26952	predicted gene, 26952	-2.28708	1
ENSMUSG00000089235	Gm23119	predicted gene, 23119	-2.28517	1
ENSMUSG00000110768	Gm18541	predicted gene, 18541	-2.28315	0.0581439
ENSMUSG00000023829	Slc22a1	solute carrier family 22 (organic cation transporter), member 1	-2.28219	1
ENSMUSG00000082585	Gm15387	predicted gene 15387	-2.28163	0.0130187
ENSMUSG00000004031	Brinp2	bone morphogenic protein/retinoic acid inducible neural-specific 2	-2.2811	0.112054
ENSMUSG00000101678	Gm29609	predicted gene 29609	-2.2782	1
ENSMUSG00000057160	Gm16372	predicted pseudogene 16372	-2.27756	1
ENSMUSG00000094777	H2ac24	H2A clustered histone 24	-2.27682	1
ENSMUSG00000112481	Gm29684	predicted gene, 29684	-2.2763	1
ENSMUSG00000084033	Gm7645	predicted gene 7645	-2.27507	0.213733
ENSMUSG00000083240	Gm13453	predicted gene 13453	-2.27483	0.10653
ENSMUSG00000037347	Chst7	carbohydrate (N-acetylglucosamino) sulfotransferase 7	-2.27321	0.401759
ENSMUSG00000048834	Vstm2a	V-set and transmembrane domain containing 2A	-2.27054	0.141615
ENSMUSG00000112581	1700022H01Rik	RIKEN cDNA 1700022H01 gene	-2.26832	1
ENSMUSG00000046721	Rpl14-ps1	ribosomal protein L14, pseudogene 1	-2.26814	0.000144852
ENSMUSG00000029454	Mapkapk5	MAP kinase-activated protein kinase 5	-2.26813	1
ENSMUSG00000087693	Gm16191	predicted gene 16191	-2.267	1
ENSMUSG00000000263	Glra1	glycine receptor, alpha 1 subunit	-2.26576	1
ENSMUSG00000066245	Gm10156	predicted gene 10156	-2.26465	1
ENSMUSG00000094530	Gm21399	predicted gene, 21399	-2.2641	0.0179444
ENSMUSG00000114488	Gm5802	predicted gene 5802	-2.26339	1
ENSMUSG00000104549	Gm43142	predicted gene 43142	-2.26184	1
ENSMUSG00000048592	Gm5946	predicted gene 5946	-2.26167	1
ENSMUSG00000120386	ENSMUSG00000120386	novel transcript	-2.26133	1
ENSMUSG00000110427	4933406B17Rik	RIKEN cDNA 4933406B17 gene	-2.25961	1
ENSMUSG00000031661	Nkd1	naked cuticle 1	-2.25892	1
ENSMUSG00000082809	Gm14150	predicted gene 14150	-2.25793	1
ENSMUSG00000090305	Gm5459	predicted gene 5459	-2.25281	1
ENSMUSG00000084104	Gm13578	predicted gene 13578	-2.25275	1
ENSMUSG00000070837	Aurkc	aurora kinase C	-2.25239	1
ENSMUSG00000021768	Dusp13	dual specificity phosphatase 13	-2.25239	1
ENSMUSG00002075486	Gm55632	predicted gene, 55632	-2.24958	1
ENSMUSG00000024205	Rpl36-ps2	ribosomal protein L36, pseudogene 2	-2.24889	0.126316
ENSMUSG00000025938	Slco5a1	solute carrier organic anion transporter family, member 5A1	-2.24849	0.397338
ENSMUSG00000098470	C1rb	complement component 1, r subcomponent B	-2.24827	0.525853
ENSMUSG00000038295	Atg9b	autophagy related 9B	-2.24667	1
ENSMUSG00000081810	Gm11878	predicted gene 11878	-2.24666	1
ENSMUSG00000106089	Gm9419	predicted gene 9419	-2.24441	1
ENSMUSG00000111982	Gm35135	predicted gene, 35135	-2.24432	1
ENSMUSG00000083469	Gm14281	predicted gene 14281	-2.24391	1
ENSMUSG00000106019	Gm43672	predicted gene 43672	-2.24323	0.34434
ENSMUSG00000087675	Gm11762	predicted gene 11762	-2.24124	1
ENSMUSG00000081967	Gm14017	predicted gene 14017	-2.23515	1
ENSMUSG00000070610	Gm13127	predicted gene 13127	-2.23256	0.00318664
ENSMUSG00000117037	Gm50433	predicted gene, 50433	-2.22831	1
ENSMUSG00000000489	Pdgfb	platelet derived growth factor, B polypeptide	-2.22749	0.269766
ENSMUSG00000001128	Cfp	complement factor properdin	-2.22685	1
ENSMUSG00000109222	Gm10297	predicted pseudogene 10297	-2.22596	0.225928
ENSMUSG00000100927	Gm28536	predicted gene 28536	-2.2252	1
ENSMUSG00000092325	Gm18284	predicted gene, 18284	-2.22319	0.238534
ENSMUSG00000091277	Gm1818	predicted gene 1818	-2.22175	0.297569
ENSMUSG00000058883	Zfp708	zinc finger protein 708	-2.2191	1
ENSMUSG00000082953	Gm13217	predicted gene 13217	-2.21433	0.164425
ENSMUSG00000100204	Gm4849	predicted gene 4849	-2.21402	1
ENSMUSG00000116498	Gm38563	predicted gene, 38563	-2.21307	1
ENSMUSG00000023931	Efhb	EF hand domain family, member B	-2.21245	0.469821
ENSMUSG00000069939	Gm12070	predicted gene 12070	-2.21184	1
ENSMUSG00000099927	Gm8226	predicted gene 8226	-2.21126	1
ENSMUSG00000049420	Tmem200a	transmembrane protein 200A	-2.2096	1
ENSMUSG00000084067	Gm14269	predicted gene 14269	-2.20772	1
ENSMUSG00000084235	Gm15421	predicted gene 15421	-2.20416	1
ENSMUSG00000071035	Gm5499	predicted pseudogene 5499	-2.2022	0.0280968
ENSMUSG00000084020	Wsb2-ps	WD repeat and SOCS box-containing 2, pseudogene	-2.20132	0.0687947
ENSMUSG00000002664	Pspn	persephin	-2.1996	0.339605
ENSMUSG00000103056	Gm38268	predicted gene, 38268	-2.19831	1
ENSMUSG00000082431	Prdx2-ps1	peroxiredoxin 2, pseudogene 1	-2.19614	0.117473
ENSMUSG00000090381	Gm6158	predicted gene 6158	-2.19594	1
ENSMUSG00000031220	Awat2	acyl-CoA wax alcohol acyltransferase 2	-2.19402	0.0475739
ENSMUSG00000113473	Gm7045	predicted gene 7045	-2.19293	0.374908
ENSMUSG00000107863	Gm44389	predicted gene, 44389	-2.19122	1
ENSMUSG00000065616	Mir375	microRNA 375	-2.19074	1
ENSMUSG00000104074	Gm37025	predicted gene, 37025	-2.18876	1
ENSMUSG00000104324	Gm37320	predicted gene, 37320	-2.18855	0.590307
ENSMUSG00000113428	Gm7664	predicted gene 7664	-2.18498	1
ENSMUSG00000100007	Gm5527	predicted gene 5527	-2.18492	1
ENSMUSG00000100417	Gm28578	predicted gene 28578	-2.18378	1
ENSMUSG00000100334	C230024C17Rik	RIKEN cDNA C230024C17 gene	-2.18231	0.499101
ENSMUSG00000052295	8030423F21Rik	RIKEN cDNA 8030423F21 gene	-2.18102	0.273324
ENSMUSG00000087436	Gm16156	predicted gene 16156	-2.18043	1
ENSMUSG00000096842	Gm10736	predicted gene 10736	-2.17881	6.81659e-14
ENSMUSG00000108348	Pnma8c	PNMA family member 8C	-2.1741	1
ENSMUSG00000067224	Gm3695	predicted gene 3695	-2.1738	1
ENSMUSG00000106103	Gm43081	predicted gene 43081	-2.17344	1
ENSMUSG00000023885	Thbs2	thrombospondin 2	-2.17341	1
ENSMUSG00000032344	Cgas	cyclic GMP-AMP synthase	-2.17302	0.564333
ENSMUSG00000120435	ENSMUSG00000120435	novel transcript	-2.16816	0.392815
ENSMUSG00000082926	Gm8172	predicted pseudogene 8172	-2.16754	0.0242241
ENSMUSG00000120352	ENSMUSG00000120352	novel transcript	-2.16673	1
ENSMUSG00000055809	Dnaaf3	dynein, axonemal assembly factor 3	-2.16501	1
ENSMUSG00000021411	Pxdc1	PX domain containing 1	-2.16379	1
ENSMUSG00000116480	Gm49512	predicted gene, 49512	-2.16242	1
ENSMUSG00000075591	Gm10874	predicted gene 10874	-2.1594	1
ENSMUSG00000109367	Gm18782	predicted gene, 18782	-2.15906	0.531574
ENSMUSG00000085913	Gm15601	predicted gene 15601	-2.15746	1
ENSMUSG00000107906	Eif4a3l2	eukaryotic translation initiation factor 4A3 like 2	-2.15468	1
ENSMUSG00000118107	Gm34455	predicted gene, 34455	-2.15421	1
ENSMUSG00000066720	Cldn9	claudin 9	-2.15391	0.171468
ENSMUSG00000105726	Gm42443	predicted gene 42443	-2.15376	1
ENSMUSG00000105572	Gm43300	predicted gene 43300	-2.15376	1
ENSMUSG00000073805	Insyn2a	inhibitory synaptic factor 2A	-2.1509	0.0397993
ENSMUSG00000098274	Rpl24	ribosomal protein L24	-2.14623	0.296042
ENSMUSG00000109931	Gm39929	predicted gene, 39929	-2.14604	1
ENSMUSG00000081406	Rps6-ps4	ribosomal protein S6, pseudogene 4	-2.14543	5.32639e-06
ENSMUSG00000120141	ENSMUSG00000120141	novel transcript	-2.1454	0.0497599
ENSMUSG00000096010	H4c16	H4 histone 16	-2.14526	0.0911331
ENSMUSG00000060128	Gm2710	predicted gene 2710	-2.14301	1
ENSMUSG00000082693	Gm15190	predicted gene 15190	-2.14292	1
ENSMUSG00000083458	Gm5510	predicted pseudogene 5510	-2.14166	1
ENSMUSG00000081121	Gm12791	predicted gene 12791	-2.14098	1
ENSMUSG00000105985	Gm42993	predicted gene 42993	-2.13733	1
ENSMUSG00000103622	B430319G15Rik	RIKEN cDNA B430319G15 gene	-2.13697	1
ENSMUSG00000117285	Gm49863	predicted gene, 49863	-2.13612	0.33447
ENSMUSG00000067058	Rps15a-ps5	ribosomal protein S15A, pseudogene 5	-2.13589	1
ENSMUSG00000057990	Gm53055	predicted gene 53055	-2.13476	1
ENSMUSG00000114624	Gm48267	predicted gene, 48267	-2.1347	0.363509
ENSMUSG00000074034	Gm5921	predicted gene 5921	-2.13263	1
ENSMUSG00000034472	Rasd2	RASD family, member 2	-2.13232	0.00994663
ENSMUSG00000060438	Rps10-ps1	ribosomal protein S10, pseudogene 1	-2.1319	1
ENSMUSG00000106446	Gm42970	predicted gene 42970	-2.13141	1
ENSMUSG00000091223	Gm8775	predicted gene 8775	-2.13028	1
ENSMUSG00000028497	Hacd4	3-hydroxyacyl-CoA dehydratase 4	-2.12744	0.283563
ENSMUSG00000070960	Gm19680	predicted gene, 19680	-2.12659	1
ENSMUSG00000009614	Sardh	sarcosine dehydrogenase	-2.12651	0.725485
ENSMUSG00000039684	Gm5422	predicted pseudogene 5422	-2.12546	0.0113712
ENSMUSG00000111964	Gm8942	predicted gene 8942	-2.12299	1
ENSMUSG00000032454	Rbp2	retinol binding protein 2, cellular	-2.12069	1
ENSMUSG00000063696	Gm8730	predicted pseudogene 8730	-2.12065	1.05768e-07
ENSMUSG00000031766	Slc12a3	solute carrier family 12, member 3	-2.12019	1
ENSMUSG00000022322	Shcbp1	Shc SH2-domain binding protein 1	-2.11901	0.0561134
ENSMUSG00000120956	ENSMUSG00000120956	novel transcript, antisense to Lyrm7	-2.11705	1
ENSMUSG00000035963	Odf3l2	outer dense fiber of sperm tails 3-like 2	-2.11665	1
ENSMUSG00000120120	ENSMUSG00000120120	novel transcript	-2.11616	1
ENSMUSG00000098397	Mir7669	microRNA 7669	-2.1161	1
ENSMUSG00000078442	Ccdc105	coiled-coil domain containing 105	-2.11501	1
ENSMUSG00000084314	Rps15a-ps3	ribosomal protein S15A, pseudogene 3	-2.11456	0.0989011
ENSMUSG00000118122	Gm50405	predicted gene, 50405	-2.1104	1
ENSMUSG00000080972	Gm16061	predicted gene 16061	-2.10908	1
ENSMUSG00000118382	Gm8373	predicted gene 8373	-2.10874	1
ENSMUSG00000066443	Gm10163	predicted pseudogene 10163	-2.10696	1
ENSMUSG00000111758	Gm30373	predicted gene, 30373	-2.10587	1
ENSMUSG00000047155	Cyp4x1	cytochrome P450, family 4, subfamily x, polypeptide 1	-2.10511	0.436676
ENSMUSG00000117313	Gm49838	predicted gene, 49838	-2.10289	0.666436
ENSMUSG00000107168	Gm42507	predicted gene 42507	-2.10211	0.236593
ENSMUSG00000087612	A230005M16Rik	RIKEN cDNA A230005M16 gene	-2.10191	1
ENSMUSG00000051910	Sox6	SRY (sex determining region Y)-box 6	-2.10186	0.562607
ENSMUSG00000120579	ENSMUSG00000120579	novel transcript	-2.09889	0.524047
ENSMUSG00000094683	Ap3m1-ps	adaptor-related protein complex 3, mu 1 subunit, pseudogene	-2.09674	0.0352878
ENSMUSG00000098164	Gm5493	predicted gene 5493	-2.09229	1
ENSMUSG00000082935	Gm7658	predicted gene 7658	-2.09124	0.0566652
ENSMUSG00000028037	Ifi44	interferon-induced protein 44	-2.08967	0.599723
ENSMUSG00000011267	Zfp296	zinc finger protein 296	-2.08905	0.326198
ENSMUSG00000079598	Clec2l	C-type lectin domain family 2, member L	-2.08693	0.46377
ENSMUSG00000097456	Gm16958	predicted gene, 16958	-2.0849	0.389679
ENSMUSG00000027971	Ndst4	N-deacetylase/N-sulfotransferase (heparin glucosaminyl) 4	-2.08487	0.0809507
ENSMUSG00000022759	Lrrc74b	leucine rich repeat containing 74B	-2.08451	1
ENSMUSG00000083179	Gm12693	predicted gene 12693	-2.08441	0.17065
ENSMUSG00000107369	Gstm2-ps1	glutathione S-transferase mu 2 (muscle), pseudogene 1	-2.08323	1
ENSMUSG00000029633	Gm5578	predicted pseudogene 5578	-2.08033	0.107324
ENSMUSG00000044338	Aplnr	apelin receptor	-2.07812	0.653523
ENSMUSG00000051455	Meioc	meiosis specific with coiled-coil domain	-2.07705	1
ENSMUSG00000029436	Mmp17	matrix metallopeptidase 17	-2.07492	0.60727
ENSMUSG00000057244	Gm6139	predicted gene 6139	-2.07469	0.065779
ENSMUSG00000005980	Dnase1	deoxyribonuclease I	-2.06954	0.604979
ENSMUSG00000097772	5430416N02Rik	RIKEN cDNA 5430416N02 gene	-2.06921	1
ENSMUSG00000089838	Gm2962	predicted pseudogene 2962	-2.0676	1
ENSMUSG00000097366	Gm8177	predicted gene 8177	-2.0671	0.406279
ENSMUSG00000024481	Lvrn	laeverin	-2.06613	0.677094
ENSMUSG00000022696	Sidt1	SID1 transmembrane family, member 1	-2.06406	0.47551
ENSMUSG00000105149	Gm42983	predicted gene 42983	-2.0633	1
ENSMUSG00000033910	Gucy1a1	guanylate cyclase 1, soluble, alpha 1	-2.06156	0.242688
ENSMUSG00000072419	Dppa2	developmental pluripotency associated 2	-2.06028	1
ENSMUSG00000086670	Gm13194	predicted gene 13194	-2.05989	1
ENSMUSG00000080895	Gm11645	predicted gene 11645	-2.05804	1
ENSMUSG00000110221	Gm36210	predicted gene, 36210	-2.05611	1
ENSMUSG00000084800	Gm12205	predicted gene 12205	-2.0558	0.384087
ENSMUSG00000056735	A930024E05Rik	RIKEN cDNA A930024E05 gene	-2.05532	0.37869
ENSMUSG00000086546	Gm13709	predicted gene 13709	-2.05412	1
ENSMUSG00000113591	4930447K03Rik	RIKEN cDNA 4930447K03 gene	-2.05222	1
ENSMUSG00000109956	Gm45428	predicted gene 45428	-2.05153	0.370983
ENSMUSG00000097530	Kansl2-ps	KAT8 regulatory NSL complex subunit 2, pseudogene	-2.05003	0.0164614
ENSMUSG00000107951	Gm6210	predicted gene 6210	-2.04609	0.00505129
ENSMUSG00000103525	Gm37262	predicted gene, 37262	-2.04412	1
ENSMUSG00000081359	Cox20b	cytochrome c oxidase assembly protein 20B	-2.04042	1
ENSMUSG00000097937	Gm6967	predicted gene 6967	-2.03865	1
ENSMUSG00000000290	Itgb2	integrin beta 2	-2.03791	0.751229
ENSMUSG00000032243	Itga11	integrin alpha 11	-2.03763	1
ENSMUSG00000104846	Gm43020	predicted gene 43020	-2.0376	1
ENSMUSG00000020467	Efemp1	epidermal growth factor-containing fibulin-like extracellular matrix protein 1	-2.03622	1
ENSMUSG00000111926	Gm46204	predicted gene, 46204	-2.03543	1
ENSMUSG00000035934	Pknox2	Pbx/knotted 1 homeobox 2	-2.03526	0.0720017
ENSMUSG00000075053	Vdac3-ps1	voltage-dependent anion channel 3, pseudogene 1	-2.03302	0.00380463
ENSMUSG00000037999	Arap2	ArfGAP with RhoGAP domain, ankyrin repeat and PH domain 2	-2.03124	0.393043
ENSMUSG00000111258	Gm34397	predicted gene, 34397	-2.03004	1
ENSMUSG00000040078	Ptges3-ps	prostaglandin E synthase 3, pseudogene	-2.02953	8.59224e-09
ENSMUSG00000090021	Gm6493	predicted gene 6493	-2.02886	0.189573
ENSMUSG00000044296	Zfp879	zinc finger protein 879	-2.02808	0.0687792
ENSMUSG00000120612	ENSMUSG00000120612	novel transcript	-2.02754	0.41287
ENSMUSG00000104469	Gm37663	predicted gene, 37663	-2.02517	1
ENSMUSG00000022383	Ppara	peroxisome proliferator activated receptor alpha	-2.02471	0.443114
ENSMUSG00000055313	Pgbd1	piggyBac transposable element derived 1	-2.02294	0.0224198
ENSMUSG00000029309	Sparcl1	SPARC-like 1	-2.02249	0.75729
ENSMUSG00000119227	Gm25099	predicted gene, 25099	-2.02211	1
ENSMUSG00000103662	Gm34294	predicted gene, 34294	-2.0209	0.311759
ENSMUSG00000094627	Gm10182	predicted pseudogene 10182	-2.01615	1
ENSMUSG00000081611	Gm13651	predicted gene 13651	-2.01434	1
ENSMUSG00000082778	Gm15191	predicted gene 15191	-2.0141	1
ENSMUSG00000090475	Gm6245	predicted gene 6245	-2.0141	1
ENSMUSG00000102871	Gm37143	predicted gene, 37143	-2.0123	1
ENSMUSG00000113019	Gm47467	predicted gene, 47467	-2.01127	0.292909
ENSMUSG00000120869	ENSMUSG00000120869		-2.01084	1
ENSMUSG00000120438	ENSMUSG00000120438	novel transcript	-2.01055	1
ENSMUSG00000108409	1700025J12Rik	RIKEN cDNA 1700025J12 gene	-2.00921	1
ENSMUSG00000081476	Itpa-ps1	inosine triphosphatase (nucleoside triphosphate pyrophosphatase) pseudogene 1	-2.00905	0.12074
ENSMUSG00000047643	Gm5454	predicted gene 5454	-2.00795	1
ENSMUSG00000108137	Gm44053	predicted gene, 44053	-2.00779	1
ENSMUSG00000074071	Fam169b	family with sequence similarity 169, member B	-2.00774	0.633266
ENSMUSG00000091378	Gm4219	predicted gene 4219	-2.00773	0.441047
ENSMUSG00000113613	Gm40893	predicted gene, 40893	-2.00722	1
ENSMUSG00000113416	Gm49328	predicted gene, 49328	-2.00426	1
ENSMUSG00000087288	Gm13061	predicted gene 13061	-2.00328	1
ENSMUSG00000008999	Bmp7	bone morphogenetic protein 7	-2.00327	1
ENSMUSG00000059854	Hydin	HYDIN, axonemal central pair apparatus protein	-2.00195	1
ENSMUSG00000063535	Zfp773	zinc finger protein 773	-1.99823	0.294267
ENSMUSG00000030823	9130019O22Rik	RIKEN cDNA 9130019O22 gene	-1.998	1.80255e-06
ENSMUSG00000117086	Gm31328	predicted gene, 31328	-1.99653	1
ENSMUSG00000036545	Adamts2	a disintegrin-like and metallopeptidase (reprolysin type) with thrombospondin type 1 motif, 2	-1.99643	0.532106
ENSMUSG00000108337	Gm4971	predicted gene 4971	-1.99411	1
ENSMUSG00000081873	Gm15197	predicted gene 15197	-1.99342	1
ENSMUSG00000097149	G630030J09Rik	RIKEN cDNA G630030J09 gene	-1.99286	1
ENSMUSG00000117896	AA387883	expressed sequence AA387883	-1.99037	0.423919
ENSMUSG00000000394	Gcg	glucagon	-1.98731	3.75868e-05
ENSMUSG00000100865	Gm9320	predicted gene 9320	-1.98687	1
ENSMUSG00000039878	Slc39a5	solute carrier family 39 (metal ion transporter), member 5	-1.98546	1
ENSMUSG00000093402	Gm18588	predicted gene, 18588	-1.98452	0.123643
ENSMUSG00000108381	Gm9299	predicted gene 9299	-1.98385	0.225897
ENSMUSG00000058174	Gm5148	predicted gene 5148	-1.98028	0.183512
ENSMUSG00000086666	Gm12249	predicted gene 12249	-1.97939	0.351736
ENSMUSG00000024526	Cidea	cell death-inducing DNA fragmentation factor, alpha subunit-like effector A	-1.97821	0.559261
ENSMUSG00000002266	Zim1	zinc finger, imprinted 1	-1.97631	6.18446e-06
ENSMUSG00000029314	Gpat3	glycerol-3-phosphate acyltransferase 3	-1.97483	0.319828
ENSMUSG00000032591	Mst1	macrophage stimulating 1 (hepatocyte growth factor-like)	-1.97397	1
ENSMUSG00000020878	Lrrc46	leucine rich repeat containing 46	-1.97238	0.00313274
ENSMUSG00000101431	Gm7901	predicted gene 7901	-1.96938	0.0333166
ENSMUSG00000061684	Rpl21-ps8	ribosomal protein L21, pseudogene 8	-1.96839	1
ENSMUSG00000079501	Gm5138	predicted gene 5138	-1.96833	1
ENSMUSG00000109392	Gm5737	predicted gene 5737	-1.96831	1
ENSMUSG00000082195	Gm13034	predicted gene 13034	-1.96724	1
ENSMUSG00000082044	Snrpert	small nuclear ribonucleoprotein E, pseudogene	-1.9667	0.0549434
ENSMUSG00000112035	Gm30539	predicted gene, 30539	-1.96571	0.435667
ENSMUSG00000102819	Gm37817	predicted gene, 37817	-1.96507	1
ENSMUSG00000101942	Gm19582	predicted gene, 19582	-1.96347	0.175951
ENSMUSG00000052430	Bmpr1b	bone morphogenetic protein receptor, type 1B	-1.96228	0.0054349
ENSMUSG00000120917	ENSMUSG00000120917	novel transcript	-1.95997	1
ENSMUSG00000024306	Ccdc178	coiled coil domain containing 178	-1.9579	0.751099
ENSMUSG00000104514	Gm37164	predicted gene, 37164	-1.95476	1
ENSMUSG00000083679	Gm12892	predicted gene 12892	-1.95454	1
ENSMUSG00000058927	Gm10053	predicted gene 10053	-1.95039	0.0619187
ENSMUSG00000101841	Gm11993	predicted gene 11993	-1.94736	0.289264
ENSMUSG00000120267	ENSMUSG00000120267	novel transcript	-1.94597	1
ENSMUSG00000112163	Gm8188	predicted gene 8188	-1.94527	1
ENSMUSG00000028654	Mycl	v-myc avian myelocytomatosis viral oncogene lung carcinoma derived	-1.94448	0.514305
ENSMUSG00000107722	2900060B14Rik	RIKEN cDNA 2900060B14 gene	-1.94374	1
ENSMUSG00000085837	Kcnmb4os2	potassium large conductance calcium-activated channel, subfamily M, beta member 4, opposite strand 2	-1.94083	1
ENSMUSG00000118220	Gm6192	predicted gene 6192	-1.93957	1
ENSMUSG00000093885	Rpl35a-ps5	ribosomal protein L35A, pseudogene 5	-1.93856	1
ENSMUSG00000020051	Pah	phenylalanine hydroxylase	-1.93534	0.69654
ENSMUSG00000114995	Gm49284	predicted gene, 49284	-1.93441	0.326198
ENSMUSG00000087635	Gm13414	predicted gene 13414	-1.93335	0.234262
ENSMUSG00000120820	ENSMUSG00000120820	novel transcript	-1.9323	1
ENSMUSG00000078192	Gm7290	predicted pseudogene 7290	-1.92894	1
ENSMUSG00000046440	Gm5564	predicted gene 5564	-1.92822	0.288478
ENSMUSG00000068522	Aard	alanine and arginine rich domain containing protein	-1.92755	7.9515e-05
ENSMUSG00000096544	Gm4617	predicted pseudogene 4617	-1.92687	0.0142644
ENSMUSG00000084974	Gm15567	predicted gene 15567	-1.92525	1
ENSMUSG00000027359	Slc27a2	solute carrier family 27 (fatty acid transporter), member 2	-1.9237	0.625549
ENSMUSG00000083327	Vcp-rs	valosin containing protein, related sequence	-1.92273	1.12907e-11
ENSMUSG00000095836	Gm21960	predicted gene, 21960	-1.92079	1
ENSMUSG00000120151	ENSMUSG00000120151	novel transcript	-1.91979	1
ENSMUSG00000047793	Sned1	sushi, nidogen and EGF-like domains 1	-1.91551	0.609957
ENSMUSG00000082002	Gm6568	predicted pseudogene 6568	-1.91445	1
ENSMUSG00000115503	Gm6392	predicted gene 6392	-1.91439	1
ENSMUSG00000080977	Gm13772	predicted gene 13772	-1.91398	0.154621
ENSMUSG00000015879	Fam184b	family with sequence similarity 184, member B	-1.91333	0.643239
ENSMUSG00000121201	ENSMUSG00000121201	novel transcript, antisense to Klf13	-1.91264	1
ENSMUSG00000106680	Gm43852	predicted gene 43852	-1.91225	0.627335
ENSMUSG00000120366	ENSMUSG00000120366	novel transcript	-1.90767	1
ENSMUSG00000085711	Gm15163	predicted gene 15163	-1.90674	0.00475558
ENSMUSG00000042087	4933440N22Rik	RIKEN cDNA 4933440N22 gene	-1.90603	0.286334
ENSMUSG00000101111	Gm28437	predicted gene 28437	-1.90581	1.72026e-55
ENSMUSG00000066258	Trim12a	tripartite motif-containing 12A	-1.90417	0.359622
ENSMUSG00000106320	Gm42992	predicted gene 42992	-1.90308	0.409046
ENSMUSG00000090777	Ccdc188	coiled-coil domain containing 188	-1.90161	1
ENSMUSG00000105322	Gm43751	predicted gene 43751	-1.90005	1
ENSMUSG00000110724	Gm47824	predicted gene, 47824	-1.89717	0.341577
ENSMUSG00000021999	Cpb2	carboxypeptidase B2 (plasma)	-1.89683	5.21954e-06
ENSMUSG00000108772	Gm6063	predicted gene 6063	-1.8958	1
ENSMUSG00000114190	4930556H04Rik	RIKEN cDNA 4930556H04 gene	-1.8952	1
ENSMUSG00000120706	ENSMUSG00000120706	novel transcript	-1.89423	1
ENSMUSG00000085939	Cd63-ps	CD63 antigen, pseudogene	-1.89189	1.86601e-08
ENSMUSG00000120112	ENSMUSG00000120112	novel transcript	-1.89114	0.416033
ENSMUSG00000091050	9330020H09Rik	RIKEN cDNA 9330020H09 gene	-1.89097	0.0552821
ENSMUSG00000094708	Gm10359	predicted gene 10359	-1.89038	1
ENSMUSG00000096606	Tpbgl	trophoblast glycoprotein-like	-1.87798	0.209969
ENSMUSG00000069309	H2ac22	H2A clustered histone 22	-1.87458	1
ENSMUSG00000098905	Zfp953	zinc finger protein 953	-1.87338	0.37585
ENSMUSG00000063109	Dgkeos	diacylglycerol kinase, epsilon, opposite strand	-1.87181	0.233563
ENSMUSG00000081244	Gm13529	predicted gene 13529	-1.8709	1
ENSMUSG00000020953	Coch	cochlin	-1.8707	0.629289
ENSMUSG00000113093	Gm36862	predicted gene, 36862	-1.86843	1
ENSMUSG00000101262	Gm8326	predicted gene 8326	-1.86721	1
ENSMUSG00000027855	Sycp1	synaptonemal complex protein 1	-1.86644	0.493102
ENSMUSG00000120636	ENSMUSG00000120636	novel transcript, antisense to Ankrd29	-1.86621	1
ENSMUSG00000063129	Aldoart2	aldolase 1 A, retrogene 2	-1.86557	1
ENSMUSG00000100632	9430060I03Rik	RIKEN cDNA 9430060I03 gene	-1.86533	0.0531163
ENSMUSG00000081128	Gm13328	predicted gene 13328	-1.86492	1
ENSMUSG00000058921	Slc10a5	solute carrier family 10 (sodium/bile acid cotransporter family), member 5	-1.86416	1
ENSMUSG00000112593	Gm48882	predicted gene, 48882	-1.86345	1
ENSMUSG00000075586	Gm11529	predicted gene 11529	-1.85908	0.103405
ENSMUSG00000069867	Pabpn1l	poly(A)binding protein nuclear 1-like	-1.85875	1
ENSMUSG00000115685	D730044K07Rik	RIKEN cDNA D730044K07 gene	-1.85584	1
ENSMUSG00000050222	Il17d	interleukin 17D	-1.85445	1.9558e-17
ENSMUSG00000101249	Gm29216	predicted gene 29216	-1.85406	4.43948e-11
ENSMUSG00000120219	ENSMUSG00000120219	novel transcript	-1.85058	1
ENSMUSG00000120135	ENSMUSG00000120135	novel transcript	-1.84976	0.239412
ENSMUSG00000121204	ENSMUSG00000121204	novel transcript, sense intronic to Rmdn2	-1.84862	1
ENSMUSG00000121021	ENSMUSG00000121021	novel transcript	-1.84793	1
ENSMUSG00000062210	Tnfaip8	tumor necrosis factor, alpha-induced protein 8	-1.8476	0.0104359
ENSMUSG00000059343	Aldoart1	aldolase 1 A, retrogene 1	-1.84641	1
ENSMUSG00000111027	Gm2981	predicted gene 2981	-1.84525	0.308924
ENSMUSG00000028108	Ecm1	extracellular matrix protein 1	-1.84511	0.588782
ENSMUSG00000117416	Gm5064	predicted gene 5064	-1.84436	1
ENSMUSG00000117929	Gm6663	predicted gene 6663	-1.84384	1
ENSMUSG00000092178	Gm45351	predicted gene 45351	-1.84363	1
ENSMUSG00000085007	Smim43	small integral membrane protein 43	-1.84253	0.0214406
ENSMUSG00000113621	2900060N12Rik	RIKEN cDNA 2900060N12 gene	-1.84224	1
ENSMUSG00000076065	Mir681	microRNA 681	-1.83955	1
ENSMUSG00000043068	Fam89a	family with sequence similarity 89, member A	-1.83608	0.141833
ENSMUSG00000120144	ENSMUSG00000120144	novel transcript	-1.83299	9.30582e-05
ENSMUSG00000012187	Mogat1	monoacylglycerol O-acyltransferase 1	-1.8319	1
ENSMUSG00000099517	H3c8	H3 clustered histone 8	-1.83184	1
ENSMUSG00000092805	Gm26461	predicted gene, 26461	-1.83101	1
ENSMUSG00000089803	Gm10171	predicted gene 10171	-1.83011	1
ENSMUSG00000111356	Rpl32l	ribosomal protein L32-like	-1.82949	1
ENSMUSG00000041945	Mfsd9	major facilitator superfamily domain containing 9	-1.8292	0.092815
ENSMUSG00000081382	Rpl18-ps1	ribosomal protein L18, pseudogene 1	-1.82862	0.331755
ENSMUSG00000099488	Gm19774	predicted gene, 19774	-1.82791	1
ENSMUSG00000118358	Gm36315	predicted gene, 36315	-1.82696	1
ENSMUSG00000021416	Eci3	enoyl-Coenzyme A delta isomerase 3	-1.82555	0.107658
ENSMUSG00000037012	Hk1	hexokinase 1	-1.82466	0.350086
ENSMUSG00000079884	Tmed2b	transmembrane p24 trafficking protein 2B	-1.8243	1.73728e-10
ENSMUSG00000110915	Gm36198	predicted gene, 36198	-1.82421	1
ENSMUSG00000091408	Gm6728	predicted gene 6728	-1.82328	0.375495
ENSMUSG00000097827	5330439K02Rik	RIKEN cDNA 5330439K02 gene	-1.82253	0.122285
ENSMUSG00000080888	Gm14387	predicted gene 14387	-1.82242	1
ENSMUSG00000019823	Mical1	microtubule associated monooxygenase, calponin and LIM domain containing 1	-1.82218	0.511143
ENSMUSG00000096299	Gm21814	predicted gene, 21814	-1.82083	0.147634
ENSMUSG00000055826	Tescl	tescalcin-like	-1.82055	0.087878
ENSMUSG00000024379	Tslp	thymic stromal lymphopoietin	-1.81822	0.494603
ENSMUSG00000052525	Spdya	speedy/RINGO cell cycle regulator family, member A	-1.81633	0.221712
ENSMUSG00000075245	Gm6043	predicted gene 6043	-1.81613	1
ENSMUSG00000093548	Gm6407	predicted gene 6407	-1.81544	1
ENSMUSG00000084632	Gm23887	predicted gene, 23887	-1.81531	1
ENSMUSG00000107747	Gm5881	predicted gene 5881	-1.8135	1
ENSMUSG00000043424	Eif3j2	eukaryotic translation initiation factor 3, subunit J2	-1.81317	0.0296928
ENSMUSG00000084968	Gm12743	predicted gene 12743	-1.81296	0.181197
ENSMUSG00000112294	Gm4129	predicted gene 4129	-1.81274	1
ENSMUSG00000104503	Gm37738	predicted gene, 37738	-1.8126	1
ENSMUSG00000078902	Gm14443	predicted gene 14443	-1.81219	0.124505
ENSMUSG00000038642	Ctss	cathepsin S	-1.81152	0.467212
ENSMUSG00000097786	4933429H19Rik	RIKEN cDNA 4933429H19 gene	-1.81141	1
ENSMUSG00000080932	Gm10224	predicted pseudogene 10224	-1.81066	1
ENSMUSG00000100707	Gm28523	predicted gene 28523	-1.8103	0.342511
ENSMUSG00000021396	Nxnl2	nucleoredoxin-like 2	-1.81022	1
ENSMUSG00000120185	ENSMUSG00000120185	novel transcript	-1.80985	1
ENSMUSG00000102775	Gm38160	predicted gene, 38160	-1.8097	0.458833
ENSMUSG00000033967	Rnf225	ring finger protein 225	-1.80698	1
ENSMUSG00000104136	Gm36955	predicted gene, 36955	-1.80671	0.596042
ENSMUSG00000037096	Gm9762	predicted pseudogene 9762	-1.80639	0.000949509
ENSMUSG00000052102	Gnpda1	glucosamine-6-phosphate deaminase 1	-1.80489	3.81108e-08
ENSMUSG00000036594	H2-Aa	histocompatibility 2, class II antigen A, alpha	-1.80465	0.620051
ENSMUSG00000068220	Lgals1	lectin, galactose binding, soluble 1	-1.80329	0.486664
ENSMUSG00000115252	Gm48996	predicted gene, 48996	-1.80322	1
ENSMUSG00000083027	Gm13140	predicted gene 13140	-1.80216	1
ENSMUSG00000059237	Ppp1r2-ps4	protein phosphatase 1, regulatory (inhibitor) subunit 2, pseudogene 4	-1.79696	1
ENSMUSG00000092116	Gm10320	predicted pseudogene 10320	-1.79665	0.159799
ENSMUSG00000078636	Gm7336	predicted gene 7336	-1.79622	1
ENSMUSG00000041688	Amot	angiomotin	-1.79561	0.623205
ENSMUSG00000103921	Gm5841	predicted gene 5841	-1.79554	1
ENSMUSG00000067869	Tcea1-ps1	transcription elongation factor A (SII) 1, pseudogene 1	-1.79186	0.0162043
ENSMUSG00000091655	Gm8741	predicted gene 8741	-1.79099	0.348221
ENSMUSG00000072387	Gm10356	predicted gene 10356	-1.79031	1
ENSMUSG00000111446	Gm6581	predicted gene 6581	-1.79003	0.0155547
ENSMUSG00000096094	A630095N17Rik	RIKEN cDNA A630095N17 gene	-1.78409	1
ENSMUSG00000114590	5930438M14Rik	RIKEN cDNA 5930438M14 gene	-1.78367	0.668813
ENSMUSG00000115611	Gm4606	predicted gene 4606	-1.78224	1
ENSMUSG00000051323	Pcdh19	protocadherin 19	-1.78157	1
ENSMUSG00000097411	B430218F22Rik	RIKEN cDNA B430218F22 gene	-1.78051	1
ENSMUSG00000110120	Gm45251	predicted gene 45251	-1.78043	0.278879
ENSMUSG00000009633	G0s2	G0/G1 switch gene 2	-1.77949	0.557801
ENSMUSG00000063887	Nlgn1	neuroligin 1	-1.77868	0.00314775
ENSMUSG00000120913	ENSMUSG00000120913	novel transcript	-1.77796	1
ENSMUSG00000054999	Naaladl1	N-acetylated alpha-linked acidic dipeptidase-like 1	-1.77669	0.234494
ENSMUSG00000097595	1500002F19Rik	RIKEN cDNA 1500002F19 gene	-1.7751	0.382239
ENSMUSG00000081888	Spcs2-ps	signal peptidase complex subunit 2, pseudogene	-1.77465	0.0219147
ENSMUSG00000109262	Gm44744	predicted gene 44744	-1.77389	0.0935498
ENSMUSG00000084842	Pabpc1l2b	poly(A) binding protein, cytoplasmic 1-like 2B	-1.77283	1
ENSMUSG00000022501	Prm1	protamine 1	-1.77215	1
ENSMUSG00000115448	Gm21178	predicted gene, 21178	-1.77202	1
ENSMUSG00000097288	Gm2155	predicted gene 2155	-1.77086	1
ENSMUSG00000086839	Gm11973	predicted gene 11973	-1.77024	1
ENSMUSG00000113603	Gm47004	predicted gene, 47004	-1.77008	1
ENSMUSG00000046585	Cfap58	cilia and flagella associated protein 58	-1.76696	0.593964
ENSMUSG00000059058	Tma7-ps	translational machinery associated 7 homolog (S. cerevisiae), pseudogene	-1.76676	0.339107
ENSMUSG00000039672	Kcne2	potassium voltage-gated channel, Isk-related subfamily, gene 2	-1.76549	1
ENSMUSG00000079173	Zan	zonadhesin	-1.76438	0.6801
ENSMUSG00000104295	Gm6197	predicted gene 6197	-1.76419	1
ENSMUSG00000024905	Tesmin	testis expressed metallothionein like	-1.7623	0.677706
ENSMUSG00000120437	ENSMUSG00000120437	novel transcript	-1.76166	0.250806
ENSMUSG00000059921	Unc5c	unc-5 netrin receptor C	-1.76105	0.162225
ENSMUSG00000103085	Gm38120	predicted gene, 38120	-1.75875	1
ENSMUSG00000114087	Gm7046	predicted gene 7046	-1.75705	1
ENSMUSG00000058260	Serpina9	serine (or cysteine) peptidase inhibitor, clade A (alpha-1 antiproteinase, antitrypsin), member 9	-1.75629	1
ENSMUSG00000048188	Gm8181	predicted gene 8181	-1.75543	1
ENSMUSG00000036915	Kirrel2	kirre like nephrin family adhesion molecule 2	-1.7554	0.386551
ENSMUSG00000048721	Fndc9	fibronectin type III domain containing 9	-1.75417	1
ENSMUSG00000104107	Gm37879	predicted gene, 37879	-1.75368	1
ENSMUSG00000084838	Gm10241	predicted pseudogene 10241	-1.753	0.12098
ENSMUSG00000028553	Angptl3	angiopoietin-like 3	-1.75018	1
ENSMUSG00000092563	Gm3617	predicted gene 3617	-1.75018	1
ENSMUSG00000027577	Chrna4	cholinergic receptor, nicotinic, alpha polypeptide 4	-1.74914	0.579769
ENSMUSG00000078139	AK157302	cDNA sequence AK157302	-1.74769	0.0960731
ENSMUSG00000087263	Gm15726	predicted gene 15726	-1.74596	1
ENSMUSG00000104211	Gm37985	predicted gene, 37985	-1.74564	0.355695
ENSMUSG00000063929	Cyp4a32	cytochrome P450, family 4, subfamily a, polypeptide 32	-1.74516	1
ENSMUSG00000108484	Gm18537	predicted gene, 18537	-1.74418	0.181197
ENSMUSG00000080021	Gm5915	predicted pseudogene 5915	-1.74357	1
ENSMUSG00000064317	Gm10146	predicted gene 10146	-1.74152	0.0368148
ENSMUSG00000086801	Gm15943	predicted gene 15943	-1.73957	1
ENSMUSG00000091952	Gm17709	predicted gene, 17709	-1.73922	0.357688
ENSMUSG00000081787	Gm13991	predicted gene 13991	-1.73849	0.453499
ENSMUSG00000106230	Gm29811	predicted gene, 29811	-1.73797	1
ENSMUSG00000001348	Acp5	acid phosphatase 5, tartrate resistant	-1.73722	1
ENSMUSG00000100071	Gm28707	predicted gene 28707	-1.73625	0.484906
ENSMUSG00000072944	Nup62cl	nucleoporin 62 C-terminal like	-1.73397	0.431169
ENSMUSG00000118718	Gm24950	predicted gene, 24950	-1.73357	1
ENSMUSG00000063875	Rps6-ps1	ribosomal protein S6, pseudogene 1	-1.73251	1
ENSMUSG00000107096	Gm43597	predicted gene 43597	-1.73205	0.116576
ENSMUSG00000093908	Gm5784	predicted gene 5784	-1.73073	0.386551
ENSMUSG00000120596	ENSMUSG00000120596	novel transcript	-1.72948	1
ENSMUSG00000061724	Gm2423	predicted gene 2423	-1.72912	6.45311e-08
ENSMUSG00000113586	Gm48606	predicted gene, 48606	-1.72827	0.246243
ENSMUSG00000082475	Gm7206	predicted pseudogene 7206	-1.72668	0.387335
ENSMUSG00000066158	AY512931	cDNA sequence AY512931	-1.72651	1
ENSMUSG00000036896	C1qc	complement component 1, q subcomponent, C chain	-1.72547	0.336831
ENSMUSG00000090461	Il22b	interleukin 22B	-1.72488	0.338927
ENSMUSG00000053178	Mterf1b	mitochondrial transcription termination factor 1b	-1.72477	0.153958
ENSMUSG00000060969	Irx1	Iroquois homeobox 1	-1.72445	1
ENSMUSG00000117548	Gm41662	predicted gene, 41662	-1.7241	1
ENSMUSG00000057697	Vmn1r53	vomeronasal 1 receptor 53	-1.7241	1
ENSMUSG00000027016	Zfp385b	zinc finger protein 385B	-1.72335	0.557722
ENSMUSG00000032400	Zwilch	zwilch kinetochore protein	-1.72327	0.301678
ENSMUSG00000032360	Hcrtr2	hypocretin (orexin) receptor 2	-1.72176	0.493925
ENSMUSG00000083396	Gm15542	predicted gene 15542	-1.72175	0.0876454
ENSMUSG00000024663	Rab3il1	RAB3A interacting protein (rabin3)-like 1	-1.72012	0.189281
ENSMUSG00000027965	Olfm3	olfactomedin 3	-1.72006	0.0557028
ENSMUSG00000107638	Gm30524	predicted gene, 30524	-1.71985	1
ENSMUSG00000049625	Tifab	TRAF-interacting protein with forkhead-associated domain, family member B	-1.71974	0.434854
ENSMUSG00000042938	Gm14117	predicted gene 14117	-1.71954	0.297569
ENSMUSG00000025911	Adhfe1	alcohol dehydrogenase, iron containing, 1	-1.71879	0.451728
ENSMUSG00000115317	Gm32618	predicted gene, 32618	-1.71795	0.102054
ENSMUSG00000037827	Gm5884	predicted pseudogene 5884	-1.71707	0.00968269
ENSMUSG00000085875	Gm12905	predicted gene 12905	-1.71611	0.000172381
ENSMUSG00000117575	Gm36486	predicted gene, 36486	-1.71534	1
ENSMUSG00000107455	Gm43868	predicted gene, 43868	-1.715	1
ENSMUSG00000084915	C230037L18Rik	RIKEN cDNA C230037L18 gene	-1.71484	1
ENSMUSG00000087264	Gad1os	glutamate decarboxylase 1, opposite strand	-1.71366	1
ENSMUSG00000121111	ENSMUSG00000121111	novel transcript, antisense to KO:Rab12and Rab12	-1.70805	0.0936495
ENSMUSG00000097755	2010110K18Rik	RIKEN cDNA 2010110K18 gene	-1.70584	1
ENSMUSG00000026255	Efhd1	EF hand domain containing 1	-1.70522	0.55365
ENSMUSG00000075359	Gm20775	predicted gene, 20775	-1.70438	1
ENSMUSG00000111583	Gm47962	predicted gene, 47962	-1.70395	0.000317082
ENSMUSG00000086228	Ubap1l	ubiquitin-associated protein 1-like	-1.70332	1
ENSMUSG00000069308	H2bc22	H2B clustered histone 22	-1.70231	0.0975584
ENSMUSG00000083678	Gm12989	predicted gene 12989	-1.70223	1
ENSMUSG00000097906	Gm9625	predicted gene 9625	-1.70099	0.0777831
ENSMUSG00000024299	Adamts10	a disintegrin-like and metallopeptidase (reprolysin type) with thrombospondin type 1 motif, 10	-1.69991	1
ENSMUSG00000028681	Ptch2	patched 2	-1.69569	0.302698
ENSMUSG00000084885	3010001F23Rik	RIKEN cDNA 3010001F23 gene	-1.69496	0.00883895
ENSMUSG00000067768	Xlr4b	X-linked lymphocyte-regulated 4B	-1.69347	0.480082
ENSMUSG00000117900	Gm50323	predicted gene, 50323	-1.69117	0.52616
ENSMUSG00000074903	Gm2058	predicted gene 2058	-1.68794	0.156836
ENSMUSG00000117327	Gm6467	predicted gene 6467	-1.6848	1
ENSMUSG00000058126	Tpm3-rs7	tropomyosin 3, related sequence 7	-1.68467	0.122017
ENSMUSG00000057842	Zfp595	zinc finger protein 595	-1.68457	0.0013038
ENSMUSG00000035239	Neu3	neuraminidase 3	-1.68443	0.0155547
ENSMUSG00000049235	Gm7324	predicted gene 7324	-1.68335	0.484431
ENSMUSG00000113625	Gm3379	predicted gene 3379	-1.68295	0.000280194
ENSMUSG00000079608	Stard6	StAR-related lipid transfer (START) domain containing 6	-1.6825	0.00976989
ENSMUSG00000105687	Gm6157	predicted gene 6157	-1.68169	1
ENSMUSG00000068466	Gm5518	predicted gene 5518	-1.68008	0.243417
ENSMUSG00000050288	Fzd2	frizzled class receptor 2	-1.68006	1
ENSMUSG00000114579	Gm4130	predicted gene 4130	-1.67997	0.00783517
ENSMUSG00000113061	Rps18-ps5	ribosomal protein S18, pseudogene 5	-1.67871	0.315111
ENSMUSG00000102193	Gm7299	predicted gene 7299	-1.67837	1
ENSMUSG00000026308	Klhl30	kelch-like 30	-1.67827	0.737983
ENSMUSG00000074052	BC048644	cDNA sequence BC048644	-1.67788	1
ENSMUSG00000031026	Trim66	tripartite motif-containing 66	-1.67694	0.363896
ENSMUSG00000107383	Gm4366	predicted gene 4366	-1.67571	0.000420642
ENSMUSG00000031079	Zfp300	zinc finger protein 300	-1.67323	0.43384
ENSMUSG00000094463	Gm8546	predicted gene 8546	-1.67148	1
ENSMUSG00000105460	Gm42671	predicted gene 42671	-1.67078	1
ENSMUSG00000079224	Gm6565	predicted gene 6565	-1.66985	0.0130153
ENSMUSG00000084284	Tpt1-ps6	tumor protein, translationally-controlled, pseudogene 6	-1.66951	0.30762
ENSMUSG00000120399	ENSMUSG00000120399	novel transcript	-1.66919	1
ENSMUSG00000045657	Pcdhb10	protocadherin beta 10	-1.66786	0.755881
ENSMUSG00000097689	4930471D02Rik	RIKEN cDNA 4930471D02 gene	-1.66695	0.49319
ENSMUSG00000113651	Gm4900	predicted gene 4900	-1.66581	1
ENSMUSG00000121374	ENSMUSG00000121374	novel transcript	-1.66579	0.38468
ENSMUSG00000056888	Glipr1	GLI pathogenesis-related 1 (glioma)	-1.66573	1
ENSMUSG00000034664	Itga2b	integrin alpha 2b	-1.66502	0.478358
ENSMUSG00000036295	Lrrn3	leucine rich repeat protein 3, neuronal	-1.66448	1
ENSMUSG00000081434	Gm14165	predicted gene 14165	-1.66372	0.323049
ENSMUSG00000067455	H4c11	H4 clustered histone 11	-1.66314	0.000279499
ENSMUSG00000078486	Perm1	PPARGC1 and ESRR induced regulator, muscle 1	-1.66268	0.437508
ENSMUSG00000095762	Gm16378	predicted gene 16378	-1.66245	0.135781
ENSMUSG00000094338	H2bc13	H2B clustered histone 13	-1.66177	1
ENSMUSG00000041540	Sox5	SRY (sex determining region Y)-box 5	-1.66079	0.158086
ENSMUSG00000075391	Glo1-ps	glyoxalase 1, pseudogene	-1.65976	0.0955502
ENSMUSG00000112352	Gm40617	predicted gene, 40617	-1.65961	1
ENSMUSG00000086524	Pabpc1l2a	poly(A) binding protein, cytoplasmic 1-like 2A	-1.65935	1
ENSMUSG00000022871	Fetub	fetuin beta	-1.65856	0.428686
ENSMUSG00000105004	Gm43075	predicted gene 43075	-1.65714	0.527473
ENSMUSG00000109472	Gm18943	predicted gene, 18943	-1.65636	1
ENSMUSG00000110229	Gm31784	predicted gene, 31784	-1.65543	0.168002
ENSMUSG00000069184	Zfp72	zinc finger protein 72	-1.6553	0.11451
ENSMUSG00000040260	Daam2	dishevelled associated activator of morphogenesis 2	-1.6547	1
ENSMUSG00000003418	St8sia6	ST8 alpha-N-acetyl-neuraminide alpha-2,8-sialyltransferase 6	-1.6541	1
ENSMUSG00000097740	E030044B06Rik	RIKEN cDNA E030044B06 gene	-1.65389	1
ENSMUSG00000089680	Gm15722	predicted gene 15722	-1.65307	0.420197
ENSMUSG00000117234	Gm7818	predicted gene 7818	-1.65261	0.000176788
ENSMUSG00000080775	Gm6368	predicted gene 6368	-1.65235	1
ENSMUSG00000002289	Angptl4	angiopoietin-like 4	-1.65231	0.423036
ENSMUSG00000006649	Nphs1	nephrosis 1, nephrin	-1.65165	0.753018
ENSMUSG00000113379	Gm46436	predicted gene, 46436	-1.65119	1
ENSMUSG00000063754	Gm10136	predicted pseudogene 10136	-1.64935	1
ENSMUSG00000029273	Sult1d1	sulfotransferase family 1D, member 1	-1.64536	6.00537e-06
ENSMUSG00000086140	Hnf1aos2	HNF1 homeobox A, opposite strand 2	-1.64456	1
ENSMUSG00000013928	1700020L13Rik	RIKEN cDNA 1700020L13 gene	-1.64398	0.38173
ENSMUSG00000082575	Eef2-ps2	eukaryotic translation elongation factor 2, pseudogene 2	-1.64374	0.350057
ENSMUSG00000107812	Gm43935	predicted gene, 43935	-1.64365	1
ENSMUSG00000024610	Cd74	CD74 antigen (invariant polypeptide of major histocompatibility complex, class II antigen-associated)	-1.64331	0.368989
ENSMUSG00000110644	Gm7390	predicted gene 7390	-1.64116	1
ENSMUSG00000020135	Apc2	APC regulator of WNT signaling pathway 2	-1.64094	0.095786
ENSMUSG00000038009	Dnajc22	DnaJ heat shock protein family (Hsp40) member C22	-1.64088	0.646493
ENSMUSG00000067017	Capza1-ps1	capping actin protein of muscle Z-line subunit alpha 1, pseudogene 1	-1.63645	0.34272
ENSMUSG00000109390	Gm45718	predicted gene 45718	-1.63543	0.648085
ENSMUSG00000038756	Ttll6	tubulin tyrosine ligase-like family, member 6	-1.6347	1
ENSMUSG00000087192	Lexis1	lipid responsive LXR-induced inhibitor of cholesterol synthesis 1	-1.63425	0.353192
ENSMUSG00000025576	Rbfox3	RNA binding protein, fox-1 homolog (C. elegans) 3	-1.63299	0.416097
ENSMUSG00000061848	Gm5805	predicted gene 5805	-1.63279	0.0845345
ENSMUSG00000101795	Gm5835	predicted gene 5835	-1.63171	0.0615749
ENSMUSG00000036305	Rpl39-ps	ribosomal protein L39, pseudogene	-1.63119	1
ENSMUSG00000045103	Dmd	dystrophin, muscular dystrophy	-1.6307	0.243201
ENSMUSG00000121045	ENSMUSG00000121045	novel transcript, antisense to Tab1	-1.62948	1
ENSMUSG00000041309	Nkx6-2	NK6 homeobox 2	-1.62927	0.00576965
ENSMUSG00000075279	Mrpl23-ps1	mitichondrial ribosomal protein L23, pseudogene 1	-1.6266	0.00500313
ENSMUSG00000076435	Acsf2	acyl-CoA synthetase family member 2	-1.6264	0.522404
ENSMUSG00000079067	Hmgn2-ps1	high mobility group nucleosomal binding domain 2, pseudogene 1	-1.62618	0.447083
ENSMUSG00000035299	Mid1	midline 1	-1.62535	0.379644
ENSMUSG00000059742	Kcnh7	potassium voltage-gated channel, subfamily H (eag-related), member 7	-1.62494	0.188367
ENSMUSG00000097639	Platr4	pluripotency associated transcript 4	-1.62269	0.312449
ENSMUSG00000112006	Gm48633	predicted gene, 48633	-1.62052	0.561848
ENSMUSG00000075528	Aarsd1	alanyl-tRNA synthetase domain containing 1	-1.61971	1
ENSMUSG00000081179	Gm13136	predicted gene 13136	-1.61962	0.274461
ENSMUSG00000085225	Gm14637	predicted gene 14637	-1.6194	0.0687518
ENSMUSG00000119946	ENSMUSG00000119946	novel transcript	-1.61809	0.431039
ENSMUSG00000099510	Gm28501	predicted gene 28501	-1.61732	1
ENSMUSG00000022408	Fam83f	family with sequence similarity 83, member F	-1.61712	1
ENSMUSG00000087056	Gm14004	predicted gene 14004	-1.61573	0.382315
ENSMUSG00000029254	Stap1	signal transducing adaptor family member 1	-1.6157	1
ENSMUSG00000112105	Rps7-ps2	ribosomal protein S7, pseudogene 2	-1.61555	1
ENSMUSG00000100131	Gm28439	predicted gene 28439	-1.61331	0.0399039
ENSMUSG00000024008	Cpne5	copine V	-1.61276	0.126618
ENSMUSG00000047496	Rnf152	ring finger protein 152	-1.61006	0.527119
ENSMUSG00000082534	Gm13712	predicted gene 13712	-1.60982	1
ENSMUSG00000115457	Gm2387	predicted gene 2387	-1.60978	1
ENSMUSG00000111197	Gm10608	predicted gene 10608	-1.60924	0.248201
ENSMUSG00000113948	Rpl17-ps3	ribosomal protein L17, pseudogene 3	-1.60852	1
ENSMUSG00000100211	1700064M15Rik	RIKEN cDNA 1700064M15 gene	-1.60784	1
ENSMUSG00000023914	Mep1a	meprin 1 alpha	-1.60739	1
ENSMUSG00000036356	Csgalnact1	chondroitin sulfate N-acetylgalactosaminyltransferase 1	-1.60494	0.749767
ENSMUSG00000025201	Bloc1s2-ps	biogenesis of lysosomal organelles complex-1, subunit 2, pseudogene	-1.60448	0.239625
ENSMUSG00000081113	Gm7308	predicted pseudogene 7308	-1.60439	0.380213
ENSMUSG00000119476	Rnu1a1	U1a1 small nuclear RNA	-1.60325	1
ENSMUSG00000108702	Gm9333	predicted gene 9333	-1.60285	1
ENSMUSG00000064351	mt-Co1	mitochondrially encoded cytochrome c oxidase I	-1.60143	2.12269e-38
ENSMUSG00000055197	Fev	FEV transcription factor, ETS family member	-1.60107	0.0608091
ENSMUSG00000082896	Gm5844	predicted gene 5844	-1.59937	0.0327346
ENSMUSG00000080823	Atp5l-ps2	ATP synthase, H+ transporting, mitochondrial F0 complex, subunit G, pseudogene 2	-1.5981	1
ENSMUSG00000119873	Gm24497	predicted gene, 24497	-1.59797	0.385238
ENSMUSG00000120079	ENSMUSG00000120079	novel transcript	-1.59735	1
ENSMUSG00000106732	Gm43792	predicted gene 43792	-1.59674	0.701069
ENSMUSG00000048003	Catsper4	cation channel, sperm associated 4	-1.59492	0.525875
ENSMUSG00000043556	Fbxl7	F-box and leucine-rich repeat protein 7	-1.59416	0.470288
ENSMUSG00000036469	Marchf1	membrane associated ring-CH-type finger 1	-1.59379	0.388286
ENSMUSG00000118651	Gm17315	predicted gene, 17315	-1.59283	1
ENSMUSG00000078153	Psme2b	protease (prosome, macropain) activator subunit 2B	-1.59176	0.016875
ENSMUSG00000121036	ENSMUSG00000121036	novel transcript, antisense to Arl6ip5and KO:Arl6ip5	-1.59153	1
ENSMUSG00000023737	1700082M22Rik	RIKEN cDNA 1700082M22 gene	-1.58903	0.678148
ENSMUSG00000028289	Epha7	Eph receptor A7	-1.588	4.42343e-08
ENSMUSG00000032122	Slc37a2	solute carrier family 37 (glycerol-3-phosphate transporter), member 2	-1.58789	0.657133
ENSMUSG00000114733	Gm4815	predicted gene 4815	-1.58721	1
ENSMUSG00000029334	Prkg2	protein kinase, cGMP-dependent, type II	-1.58634	0.0138647
ENSMUSG00000050122	Vwa3b	von Willebrand factor A domain containing 3B	-1.5862	0.735467
ENSMUSG00000047342	Zfp286	zinc finger protein 286	-1.58619	0.599483
ENSMUSG00000073460	Pnldc1	poly(A)-specific ribonuclease (PARN)-like domain containing 1	-1.58482	0.70668
ENSMUSG00000049396	Gemin4	gem nuclear organelle associated protein 4	-1.58462	1
ENSMUSG00000096647	Tmem41b-ps	transmembrane protein 41B, pseudogene	-1.58307	0.306604
ENSMUSG00000108267	Gm44190	predicted gene, 44190	-1.58238	0.5541
ENSMUSG00000079033	Mef2b	myocyte enhancer factor 2B	-1.58173	0.654192
ENSMUSG00000080928	Hmgb1-ps6	high mobility group box 1, pseudogene 6	-1.58027	1
ENSMUSG00000081805	Gm14335	predicted gene 14335	-1.57782	0.485336
ENSMUSG00000087431	Gm16054	predicted gene 16054	-1.57628	1
[truncated: 17,543 more rows]

## Sheet: Chd3Db_DEG_FldChg>2_p<0.05
feature_id	geneId	full_name	logFcValue	logProbValue
ENSMUSG00000026818	Cel	carboxyl ester lipase	-28.293	1.88035e-13
ENSMUSG00000047517	Dmbt1	deleted in malignant brain tumors 1	-25.3031	7.98656e-11
ENSMUSG00000049350	Zg16	zymogen granule protein 16	-24.41	8.85967e-11
ENSMUSG00000023140	Reg2	regenerating islet-derived 2	-24.1943	6.19212e-10
ENSMUSG00000040205	Cuzd1	CUB and zona pellucida-like domains 1	-23.1593	3.883e-09
ENSMUSG00000025091	Pnliprp2	pancreatic lipase-related protein 2	-22.5482	1.06276e-08
ENSMUSG00000024028	Tff2	trefoil factor 2 (spasmolytic protein 1)	-22.0178	2.57752e-08
ENSMUSG00000034139	Serpini2	serine (or cysteine) peptidase inhibitor, clade I, member 2	-21.9497	2.89424e-08
ENSMUSG00000068341	Reg3d	regenerating islet-derived 3 delta	-21.2454	8.95466e-08
ENSMUSG00000030219	Erp27	endoplasmic reticulum protein 27	-20.5934	3.06425e-08
ENSMUSG00000071519	Prss3	protease, serine 3	-20.5322	3.56766e-08
ENSMUSG00000071356	Reg3b	regenerating islet-derived 3 beta	-19.7462	3.85454e-07
ENSMUSG00000011463	Cpb1	carboxypeptidase B1 (tissue)	-13.6931	2.70692e-05
ENSMUSG00000070360	Amy2a1	amylase 2a1	-12.1285	0.000204869
ENSMUSG00000054446	Cpa1	carboxypeptidase A1, pancreatic	-11.9402	6.42721e-05
ENSMUSG00000030954	Gp2	glycoprotein 2 (zymogen granule membrane)	-11.4825	0.00347232
ENSMUSG00000031957	Ctrb1	chymotrypsinogen B1	-11.4768	0.00255305
ENSMUSG00000059654	Reg1	regenerating islet-derived 1	-11.3141	0.00333401
ENSMUSG00000058579	Cela2a	chymotrypsin-like elastase family, member 2A	-10.3665	0.000129281
ENSMUSG00000031896	Ctrl	chymotrypsin-like	-9.51995	0.00174013
ENSMUSG00000083079	Amy2b	amylase 2b	-9.41655	0.0060172
ENSMUSG00000046008	Pnlip	pancreatic lipase	-9.33426	0.000640405
ENSMUSG00000057163	Prss2	protease, serine 2	-9.29255	0.00518265
ENSMUSG00000042179	Pnliprp1	pancreatic lipase related protein 1	-9.22294	0.00307411
ENSMUSG00000029882	2210010C04Rik	RIKEN cDNA 2210010C04 gene	-9.03251	0.0294778
ENSMUSG00000054106	Try4	trypsin 4	-9.0027	0.001299
ENSMUSG00000023433	Cela3b	chymotrypsin-like elastase family, member 3B	-8.99206	0.00576773
ENSMUSG00000109209	Gm45104	predicted gene 45104	-8.93043	0.00132231
ENSMUSG00000024225	Clps	colipase, pancreatic	-8.86477	0.000296262
ENSMUSG00000064358	mt-Co3	mitochondrially encoded cytochrome c oxidase III	-8.26875	6.23863e-07
ENSMUSG00000114985	1810028F09Rik	RIKEN cDNA 1810028F09 gene	-8.21192	0.0398575
ENSMUSG00000064357	mt-Atp6	mitochondrially encoded ATP synthase 6	-8.15812	4.72511e-07
ENSMUSG00000049723	Mmp12	matrix metallopeptidase 12	-8.08476	0.00253107
ENSMUSG00000035896	Rnase1	ribonuclease, RNase A family, 1 (pancreatic)	-8.01256	0.0004221
ENSMUSG00000029522	Pla2g1b	phospholipase A2, group IB, pancreas	-7.46922	0.0481212
ENSMUSG00000064354	mt-Co2	mitochondrially encoded cytochrome c oxidase II	-7.10019	2.26598e-05
ENSMUSG00000005220	Corin	corin, serine peptidase	-7.0165	0.000823609
ENSMUSG00000052160	Pld4	phospholipase D family, member 4	-6.43858	0.00424109
ENSMUSG00000048498	Cd300e	CD300E molecule	-6.35409	0.0307047
ENSMUSG00000026432	Avpr1b	arginine vasopressin receptor 1B	-6.28206	0.0472478
ENSMUSG00000038768	9130409I23Rik	RIKEN cDNA 9130409I23 gene	-6.22428	0.00736622
ENSMUSG00000012819	Cdh23	cadherin 23 (otocadherin)	-6.19366	0.0478002
ENSMUSG00000046192	Iqub	IQ motif and ubiquitin domain containing	-6.10649	0.0452309
ENSMUSG00000038775	Vill	villin-like	-6.08452	0.0471635
ENSMUSG00000003283	Hck	hemopoietic cell kinase	-6.06925	0.0471049
ENSMUSG00000094594	Tpd52-ps	tumor protein D52, pseudogene	-5.87052	0.000990484
ENSMUSG00000036938	Try5	trypsin 5	-5.83336	0.0299789
ENSMUSG00000081251	Gm12164	predicted gene 12164	-5.80644	0.00026669
ENSMUSG00000015224	Cyp2j9	cytochrome P450, family 2, subfamily j, polypeptide 9	-5.6827	0.000820456
ENSMUSG00000081788	Gm5898	predicted gene 5898	-5.64327	0.00224954
ENSMUSG00000084260	Gm12844	predicted gene 12844	-5.59237	0.00353829
ENSMUSG00000117484	Gm5500	predicted pseudogene 5500	-5.58243	0.00291007
ENSMUSG00000083367	Gm8806	predicted gene 8806	-5.56555	0.00263984
ENSMUSG00000120274	ENSMUSG00000120274	novel transcript	-5.47527	0.0049014
ENSMUSG00000067736	Gm10222	predicted gene 10222	-5.40882	0.00724643
ENSMUSG00000082884	Gm13339	predicted gene 13339	-5.39471	0.00576841
ENSMUSG00000100303	2600014E21Rik	RIKEN cDNA 2600014E21 gene	-5.35193	0.027103
ENSMUSG00000023031	Cela1	chymotrypsin-like elastase family, member 1	-5.29549	0.0231124
ENSMUSG00000116811	Gm16385	predicted gene 16385	-5.20872	0.0107566
ENSMUSG00000083626	Gm4459	predicted gene 4459	-5.0334	0.00392199
ENSMUSG00000084111	Gm15710	predicted gene 15710	-4.74045	0.011625
ENSMUSG00000083283	Gm15361	predicted pseudogene 15361	-4.71784	0.0105774
ENSMUSG00000025432	Avil	advillin	-4.69493	0.0052742
ENSMUSG00000057173	Rfx8	regulatory factor X 8	-4.69241	0.03529
ENSMUSG00000113431	Gm6722	predicted gene 6722	-4.66939	0.0138508
ENSMUSG00000120567	ENSMUSG00000120567	novel transcript	-4.51818	0.0443971
ENSMUSG00000029664	Tfpi2	tissue factor pathway inhibitor 2	-4.5101	0.00392764
ENSMUSG00000062980	Cped1	cadherin-like and PC-esterase domain containing 1	-4.41766	0.0281411
ENSMUSG00000120202	ENSMUSG00000120202	novel transcript	-4.30552	0.00175951
ENSMUSG00000096449	Gm4076	predicted gene 4076	-4.20547	0.0384154
ENSMUSG00000070713	Hmgn2-ps	high mobility group nucleosomal binding domain 2, pseudogene	-4.18772	1.64609e-15
ENSMUSG00000120562	ENSMUSG00000120562	novel transcript	-4.10647	5.06444e-05
ENSMUSG00000112546	Gm6992	predicted gene 6992	-4.06867	0.0174321
ENSMUSG00000107798	Gm44064	predicted gene, 44064	-4.00803	0.0262986
ENSMUSG00000049233	Apoo-ps	apolipoprotein O, pseudogene	-3.97782	1.09944e-08
ENSMUSG00000058809	Hspd1-ps3	heat shock protein 1 (chaperonin), pseudogene 3	-3.90208	0.00012067
ENSMUSG00000084347	Akt2-ps	thymoma viral proto-oncogene 2, pseudogene	-3.87956	0.00420513
ENSMUSG00000064193	Gm4735	predicted gene 4735	-3.87854	1.23365e-05
ENSMUSG00000083563	Gm13340	predicted gene 13340	-3.81359	2.52152e-21
ENSMUSG00000097245	Gm5421	predicted gene 5421	-3.81201	0.00434104
ENSMUSG00000082617	Smt3h2-ps	SMT3 suppressor of mif two 3 homolog 2, pseudogene (S. cerevisiae)	-3.78925	0.00166778
ENSMUSG00000010064	Slc38a3	solute carrier family 38, member 3	-3.71809	0.0210327
ENSMUSG00000118252	Gm5521	predicted gene 5521	-3.70596	0.00186047
ENSMUSG00000082016	Pgam1-ps2	phosphoglycerate mutase 1, pseudogene 2	-3.68878	0.000497707
ENSMUSG00000118837	Rnu2-10	U2 small nuclear RNA 10	-3.6556	0.00152581
ENSMUSG00000086794	Gm11642	predicted gene 11642	-3.58934	0.0386544
ENSMUSG00000081111	Gm5913	predicted gene 5913	-3.54396	0.00434104
ENSMUSG00000091905	Dnajb6-ps	DnaJ heat shock protein family (Hsp40) member B6, pseudogene	-3.53894	0.00994663
ENSMUSG00000081552	Gm12328	predicted gene 12328	-3.53031	0.00406615
ENSMUSG00000112449	Srp54b	signal recognition particle 54B	-3.51292	0.0185767
ENSMUSG00000024761	Gm16437	predicted pseudogene 16437	-3.47533	0.0157943
ENSMUSG00000095478	Gm9824	predicted pseudogene 9824	-3.46464	0.000408519
ENSMUSG00000051255	Gm6563	predicted pseudogene 6563	-3.44496	1.69869e-15
ENSMUSG00000090610	Gm3571	predicted gene 3571	-3.34406	0.0337672
ENSMUSG00000002944	Cd36	CD36 molecule	-3.33609	0.00724643
ENSMUSG00000021032	Ngb	neuroglobin	-3.24858	0.0112499
ENSMUSG00000085611	Ap3s1-ps1	adaptor-related protein complex 3, sigma 1 subunit, pseudogene 1	-3.24436	0.00453491
ENSMUSG00000120919	ENSMUSG00000120919	novel transcript	-3.23931	0.0447499
ENSMUSG00000068587	Mgam	maltase-glucoamylase	-3.21823	0.0251416
ENSMUSG00000083325	Gm14121	predicted gene 14121	-3.1773	0.0396545
ENSMUSG00000067106	Gm5529	predicted pseudogene 5529	-3.11368	0.0370953
ENSMUSG00000063953	Amd2	S-adenosylmethionine decarboxylase 2	-3.10508	0.0100658
ENSMUSG00000083863	Gm13341	predicted gene 13341	-3.06607	1.90867e-07
ENSMUSG00000044268	Gm4895	predicted gene 4895	-3.04156	0.00215908
ENSMUSG00000110545	Gm7730	predicted gene 7730	-3.00732	0.010305
ENSMUSG00000018474	Chd3	chromodomain helicase DNA binding protein 3	-3.00708	1.01732e-16
ENSMUSG00000110123	Gm18562	predicted gene, 18562	-2.99927	1.64279e-06
ENSMUSG00000078238	Gm12854	predicted gene 12854	-2.98658	0.000844614
ENSMUSG00000082321	Gm14253	predicted gene 14253	-2.97456	0.0128559
ENSMUSG00000044285	Ubb-ps	ubiquitin B, pseudogene	-2.95778	1.74353e-168
ENSMUSG00000104913	Gm6560	predicted gene 6560	-2.92845	2.17922e-09
ENSMUSG00000084329	Gm6733	predicted gene 6733	-2.91842	3.15688e-10
ENSMUSG00000062353	Gm15772	predicted gene 15772	-2.90008	0.0129733
ENSMUSG00000084106	Gm6136	predicted pseudogene 6136	-2.8875	3.09208e-06
ENSMUSG00000053038	Gm6180	predicted pseudogene 6180	-2.88566	0.0312311
ENSMUSG00000120684	ENSMUSG00000120684	novel transcript	-2.87165	0.0138873
ENSMUSG00000043192	Gpi-ps	glucose-6-phosphate isomerase, pseudogene	-2.86197	0.0148816
ENSMUSG00000050900	Gm7327	predicted gene 7327	-2.85108	0.00780643
ENSMUSG00000094257	Ap3s1-ps2	adaptor-related protein complex 3, sigma 1 subunit, pseudogene 2	-2.80462	0.0427157
ENSMUSG00000095597	Rps7-ps3	ribosomal protein S7, pseudogene 3	-2.79744	0.0332073
ENSMUSG00000113555	Gm10095	predicted gene 10095	-2.79198	0.0001612
ENSMUSG00000100347	Gm7895	predicted gene 7895	-2.785	3.77773e-07
ENSMUSG00000060572	Mfap2	microfibrillar-associated protein 2	-2.76539	0.00369845
ENSMUSG00002076173	Gm55118	predicted gene, 55118	-2.74703	0.00734028
ENSMUSG00000096361	Gm5814	predicted pseudogene 5814	-2.7406	0.000584866
ENSMUSG00000118653	Gm2296	predicted gene 2296	-2.64332	0.031401
ENSMUSG00000082454	Gm12183	predicted gene 12183	-2.639	0.0221938
ENSMUSG00000117822	Eef1a1-ps1	eukaryotic translation elongation factor 1 alpha 1, pseudogene 1	-2.62813	0.0386544
ENSMUSG00000067719	Gm10221	predicted gene 10221	-2.61595	8.59224e-09
ENSMUSG00000036905	C1qb	complement component 1, q subcomponent, beta polypeptide	-2.58949	0.0256118
ENSMUSG00000099647	Gm5776	predicted gene 5776	-2.58077	0.0239672
ENSMUSG00000117875	Gm6789	predicted gene 6789	-2.51368	0.0227938
ENSMUSG00000066170	E230001N04Rik	RIKEN cDNA E230001N04 gene	-2.49584	0.0102253
ENSMUSG00000091421	Gm4202	predicted gene 4202	-2.46965	7.95858e-17
ENSMUSG00000104923	Gm5865	predicted gene 5865	-2.46893	0.0446821
ENSMUSG00000073060	Zxda	zinc finger, X-linked, duplicated A	-2.45402	0.00614616
ENSMUSG00000078592	Gm4609	predicted gene 4609	-2.41481	0.0302659
ENSMUSG00000063684	Hadhb-ps	hydroxyacyl-CoA dehydrogenase trifunctional multienzyme complex subunit beta, pseudogene	-2.40888	3.17174e-06
ENSMUSG00000051116	Gm8121	predicted pseudogene 8121	-2.39879	0.000455986
ENSMUSG00000058542	Gm15590	predicted gene 15590	-2.38408	0.00655002
ENSMUSG00000073198	Bnip3l-ps	BCL2/adenovirus E1B interacting protein 3-like, pseudogene	-2.38346	0.00192539
ENSMUSG00000037266	Rsrp1	arginine/serine rich protein 1	-2.37806	4.71697e-05
ENSMUSG00000020000	Moxd1	monooxygenase, DBH-like 1	-2.37659	0.048696
ENSMUSG00000087412	Gm15501	predicted pseudogene 15501	-2.36834	0.0136127
ENSMUSG00000087701	Gm13493	predicted gene 13493	-2.35896	2.04989e-09
ENSMUSG00000082319	Actr3-ps	actin related protein 3, pseudogene	-2.34824	0.000577278
ENSMUSG00000095588	Gm12350	predicted gene 12350	-2.33988	0.0013595
ENSMUSG00000111686	Rab7-ps1	RAB7, member RAS oncogene family, pseudogene 1	-2.32924	0.0201354
ENSMUSG00000029050	Ski	ski sarcoma viral oncogene homolog (avian)	-2.32916	5.57922e-55
ENSMUSG00000106831	Ube2n-ps1	ubiquitin-conjugating enzyme E2N, pseudogene 1	-2.32096	0.037357
ENSMUSG00000116875	Morf4l1-ps1	mortality factor 4 like 1, pseudogene 1	-2.31831	3.078e-07
ENSMUSG00000102070	Gm28661	predicted gene 28661	-2.30331	1.37016e-16
ENSMUSG00000106988	Tsg101-ps	tumor susceptibility gene 101, pseudogene	-2.30105	0.0292751
ENSMUSG00000082585	Gm15387	predicted gene 15387	-2.28163	0.0130187
ENSMUSG00000046721	Rpl14-ps1	ribosomal protein L14, pseudogene 1	-2.26814	0.000144852
ENSMUSG00000094530	Gm21399	predicted gene, 21399	-2.2641	0.0179444
ENSMUSG00000070610	Gm13127	predicted gene 13127	-2.23256	0.00318664
ENSMUSG00000071035	Gm5499	predicted pseudogene 5499	-2.2022	0.0280968
ENSMUSG00000031220	Awat2	acyl-CoA wax alcohol acyltransferase 2	-2.19402	0.0475739
ENSMUSG00000096842	Gm10736	predicted gene 10736	-2.17881	6.81659e-14
ENSMUSG00000082926	Gm8172	predicted pseudogene 8172	-2.16754	0.0242241
ENSMUSG00000073805	Insyn2a	inhibitory synaptic factor 2A	-2.1509	0.0397993
ENSMUSG00000081406	Rps6-ps4	ribosomal protein S6, pseudogene 4	-2.14543	5.32639e-06
ENSMUSG00000120141	ENSMUSG00000120141	novel transcript	-2.1454	0.0497599
ENSMUSG00000034472	Rasd2	RASD family, member 2	-2.13232	0.00994663
ENSMUSG00000039684	Gm5422	predicted pseudogene 5422	-2.12546	0.0113712
ENSMUSG00000063696	Gm8730	predicted pseudogene 8730	-2.12065	1.05768e-07
ENSMUSG00000094683	Ap3m1-ps	adaptor-related protein complex 3, mu 1 subunit, pseudogene	-2.09674	0.0352878
ENSMUSG00000097530	Kansl2-ps	KAT8 regulatory NSL complex subunit 2, pseudogene	-2.05003	0.0164614
ENSMUSG00000107951	Gm6210	predicted gene 6210	-2.04609	0.00505129
ENSMUSG00000075053	Vdac3-ps1	voltage-dependent anion channel 3, pseudogene 1	-2.03302	0.00380463
ENSMUSG00000040078	Ptges3-ps	prostaglandin E synthase 3, pseudogene	-2.02953	8.59224e-09
ENSMUSG00000055313	Pgbd1	piggyBac transposable element derived 1	-2.02294	0.0224198
ENSMUSG00000030823	9130019O22Rik	RIKEN cDNA 9130019O22 gene	-1.998	1.80255e-06
ENSMUSG00000000394	Gcg	glucagon	-1.98731	3.75868e-05
ENSMUSG00000002266	Zim1	zinc finger, imprinted 1	-1.97631	6.18446e-06
ENSMUSG00000020878	Lrrc46	leucine rich repeat containing 46	-1.97238	0.00313274
ENSMUSG00000101431	Gm7901	predicted gene 7901	-1.96938	0.0333166
ENSMUSG00000052430	Bmpr1b	bone morphogenetic protein receptor, type 1B	-1.96228	0.0054349
ENSMUSG00000068522	Aard	alanine and arginine rich domain containing protein	-1.92755	7.9515e-05
ENSMUSG00000096544	Gm4617	predicted pseudogene 4617	-1.92687	0.0142644
ENSMUSG00000083327	Vcp-rs	valosin containing protein, related sequence	-1.92273	1.12907e-11
ENSMUSG00000085711	Gm15163	predicted gene 15163	-1.90674	0.00475558
ENSMUSG00000101111	Gm28437	predicted gene 28437	-1.90581	1.72026e-55
ENSMUSG00000021999	Cpb2	carboxypeptidase B2 (plasma)	-1.89683	5.21954e-06
ENSMUSG00000085939	Cd63-ps	CD63 antigen, pseudogene	-1.89189	1.86601e-08
ENSMUSG00000050222	Il17d	interleukin 17D	-1.85445	1.9558e-17
ENSMUSG00000101249	Gm29216	predicted gene 29216	-1.85406	4.43948e-11
ENSMUSG00000062210	Tnfaip8	tumor necrosis factor, alpha-induced protein 8	-1.8476	0.0104359
ENSMUSG00000085007	Smim43	small integral membrane protein 43	-1.84253	0.0214406
ENSMUSG00000120144	ENSMUSG00000120144	novel transcript	-1.83299	9.30582e-05
ENSMUSG00000079884	Tmed2b	transmembrane p24 trafficking protein 2B	-1.8243	1.73728e-10
ENSMUSG00000043424	Eif3j2	eukaryotic translation initiation factor 3, subunit J2	-1.81317	0.0296928
ENSMUSG00000037096	Gm9762	predicted pseudogene 9762	-1.80639	0.000949509
ENSMUSG00000052102	Gnpda1	glucosamine-6-phosphate deaminase 1	-1.80489	3.81108e-08
ENSMUSG00000067869	Tcea1-ps1	transcription elongation factor A (SII) 1, pseudogene 1	-1.79186	0.0162043
ENSMUSG00000111446	Gm6581	predicted gene 6581	-1.79003	0.0155547
ENSMUSG00000063887	Nlgn1	neuroligin 1	-1.77868	0.00314775
ENSMUSG00000081888	Spcs2-ps	signal peptidase complex subunit 2, pseudogene	-1.77465	0.0219147
ENSMUSG00000064317	Gm10146	predicted gene 10146	-1.74152	0.0368148
ENSMUSG00000061724	Gm2423	predicted gene 2423	-1.72912	6.45311e-08
ENSMUSG00000037827	Gm5884	predicted pseudogene 5884	-1.71707	0.00968269
ENSMUSG00000085875	Gm12905	predicted gene 12905	-1.71611	0.000172381
ENSMUSG00000111583	Gm47962	predicted gene, 47962	-1.70395	0.000317082
ENSMUSG00000084885	3010001F23Rik	RIKEN cDNA 3010001F23 gene	-1.69496	0.00883895
ENSMUSG00000057842	Zfp595	zinc finger protein 595	-1.68457	0.0013038
ENSMUSG00000035239	Neu3	neuraminidase 3	-1.68443	0.0155547
ENSMUSG00000113625	Gm3379	predicted gene 3379	-1.68295	0.000280194
ENSMUSG00000079608	Stard6	StAR-related lipid transfer (START) domain containing 6	-1.6825	0.00976989
ENSMUSG00000114579	Gm4130	predicted gene 4130	-1.67997	0.00783517
ENSMUSG00000107383	Gm4366	predicted gene 4366	-1.67571	0.000420642
ENSMUSG00000079224	Gm6565	predicted gene 6565	-1.66985	0.0130153
ENSMUSG00000067455	H4c11	H4 clustered histone 11	-1.66314	0.000279499
ENSMUSG00000117234	Gm7818	predicted gene 7818	-1.65261	0.000176788
ENSMUSG00000029273	Sult1d1	sulfotransferase family 1D, member 1	-1.64536	6.00537e-06
ENSMUSG00000041309	Nkx6-2	NK6 homeobox 2	-1.62927	0.00576965
ENSMUSG00000075279	Mrpl23-ps1	mitichondrial ribosomal protein L23, pseudogene 1	-1.6266	0.00500313
ENSMUSG00000100131	Gm28439	predicted gene 28439	-1.61331	0.0399039
ENSMUSG00000064351	mt-Co1	mitochondrially encoded cytochrome c oxidase I	-1.60143	2.12269e-38
ENSMUSG00000082896	Gm5844	predicted gene 5844	-1.59937	0.0327346
ENSMUSG00000078153	Psme2b	protease (prosome, macropain) activator subunit 2B	-1.59176	0.016875
ENSMUSG00000028289	Epha7	Eph receptor A7	-1.588	4.42343e-08
ENSMUSG00000029334	Prkg2	protein kinase, cGMP-dependent, type II	-1.58634	0.0138647
ENSMUSG00000082536	Gm13456	predicted gene 13456	-1.56415	0.000527931
ENSMUSG00000047632	Fgfbp3	fibroblast growth factor binding protein 3	-1.55188	0.0190593
ENSMUSG00000061802	Odad2	outer dynein arm docking complex subunit 2	-1.54934	0.0128559
ENSMUSG00000083899	Gm12346	predicted gene 12346	-1.54179	0.0296928
ENSMUSG00000100862	Gm10925	predicted gene 10925	-1.54019	0.00592791
ENSMUSG00000057359	Gm17494	predicted gene, 17494	-1.53985	0.00619118
ENSMUSG00000101188	Eif4a-ps4	eukaryotic translation initiation factor 4A, pseudogene 4	-1.52561	9.02363e-08
ENSMUSG00000027694	Gm8325	predicted pseudogene 8325	-1.52007	0.000406049
ENSMUSG00000058064	Gm10036	predicted gene 10036	-1.51334	0.0397844
ENSMUSG00000114354	Gm34961	predicted gene, 34961	-1.49367	0.0445235
ENSMUSG00000052783	Grk4	G protein-coupled receptor kinase 4	-1.49238	0.00396555
ENSMUSG00000097164	Cep83os	centrosomal protein 83, opposite strand	-1.48879	0.000853349
ENSMUSG00000052137	Rbm12b2	RNA binding motif protein 12 B2	-1.47762	0.00114568
ENSMUSG00000084349	Rpl3-ps1	ribosomal protein L3, pseudogene 1	-1.47512	0.00427121
ENSMUSG00000051067	Lingo3	leucine rich repeat and Ig domain containing 3	-1.46318	0.00220229
ENSMUSG00000051037	Zfp455	zinc finger protein 455	-1.46119	0.0035268
ENSMUSG00000057455	Rit2	Ras-like without CAAX 2	-1.45734	0.000666913
ENSMUSG00000067279	Ppp1r3c	protein phosphatase 1, regulatory subunit 3C	-1.45532	0.0106546
ENSMUSG00000085154	C130046K22Rik	RIKEN cDNA C130046K22 gene	-1.44959	0.0108173
ENSMUSG00000056895	H2bc27	H2B clustered histone 27	-1.44905	0.0105401
ENSMUSG00000092260	Zfp963	zinc finger protein 963	-1.44295	0.000378376
ENSMUSG00000056260	Lrif1	ligand dependent nuclear receptor interacting factor 1	-1.44151	1.08463e-07
ENSMUSG00000028125	Abca4	ATP-binding cassette, sub-family A (ABC1), member 4	-1.43974	0.0157418
ENSMUSG00000086583	Gm15500	predicted pseudogene 15500	-1.43829	0.0040947
ENSMUSG00000030137	Tuba8	tubulin, alpha 8	-1.43685	0.00760712
ENSMUSG00000028307	Aldob	aldolase B, fructose-bisphosphate	-1.42023	0.000480466
ENSMUSG00000034918	Cdhr2	cadherin-related family member 2	-1.39093	8.2965e-07
ENSMUSG00000094942	Gm3604	predicted gene 3604	-1.39048	0.0217752
ENSMUSG00000096433	Zfp994	zinc finger protein 994	-1.37821	1.87191e-05
ENSMUSG00000101939	Gm28438	predicted gene 28438	-1.37678	0.00513523
ENSMUSG00000041117	Ccdc8	coiled-coil domain containing 8	-1.35315	0.000838824
ENSMUSG00000028186	Uox	urate oxidase	-1.34151	0.013483
ENSMUSG00000052676	Zmat1	zinc finger, matrin type 1	-1.34074	0.000446906
ENSMUSG00000096795	Zfp433	zinc finger protein 433	-1.33848	0.0448787
ENSMUSG00000025932	Eya1	EYA transcriptional coactivator and phosphatase 1	-1.33808	2.12784e-13
ENSMUSG00000120844	ENSMUSG00000120844	novel transcript, antisense to KO:RP23-183D11.3and Slc35e2	-1.33314	0.0386354
ENSMUSG00000047789	Slc38a9	solute carrier family 38, member 9	-1.33199	0.0260199
ENSMUSG00000045589	Frrs1l	ferric-chelate reductase 1 like	-1.32302	0.0232962
ENSMUSG00000030393	Zik1	zinc finger protein interacting with K protein 1	-1.30621	0.0349918
ENSMUSG00000049488	Tmem67	transmembrane protein 67	-1.29794	1.74977e-07
ENSMUSG00000036853	Mcoln3	mucolipin 3	-1.29057	0.00191708
ENSMUSG00000120188	ENSMUSG00000120188	novel transcript, antisense to Tmem44	-1.28785	0.0399079
ENSMUSG00000047227	Gm527	predicted gene 527	-1.28335	0.00438643
ENSMUSG00000100599	1700120C14Rik	RIKEN cDNA 1700120C14 gene	-1.27521	0.0407395
ENSMUSG00000082062	Ftl2-ps	ferritin light polypeptide 2, pseudogene	-1.26533	1.46266e-08
ENSMUSG00000097855	A930007I19Rik	RIKEN cDNA A930007I19 gene	-1.2551	0.00543469
ENSMUSG00000064370	mt-Cytb	mitochondrially encoded cytochrome b	-1.23533	9.47642e-31
ENSMUSG00000041878	8430432A02Rik	RIKEN cDNA 8430432A02 gene	-1.23274	0.0219169
ENSMUSG00000059040	Eno1b	enolase 1B, retrotransposed	-1.23263	0.011135
ENSMUSG00000051495	Irf2bp2	interferon regulatory factor 2 binding protein 2	-1.22547	2.80852e-14
ENSMUSG00000090093	Gm14399	predicted gene 14399	-1.21868	0.00374287
ENSMUSG00000002617	Zfp40	zinc finger protein 40	-1.215	0.0138512
ENSMUSG00000120551	ENSMUSG00000120551	novel transcript	-1.21283	0.0482004
ENSMUSG00000015405	Ace2	angiotensin I converting enzyme (peptidyl-dipeptidase A) 2	-1.20719	6.75044e-06
ENSMUSG00000058159	T2	brachyury 2	-1.20422	0.00365753
ENSMUSG00000034127	Tspan8	tetraspanin 8	-1.19667	0.000849432
ENSMUSG00000020648	Dus4l	dihydrouridine synthase 4-like (S. cerevisiae)	-1.19495	0.0166422
ENSMUSG00000018865	Sult4a1	sulfotransferase family 4A, member 1	-1.19279	0.00257499
ENSMUSG00000097842	9330104G04Rik	RIKEN cDNA 9330104G04 gene	-1.18946	0.0430728
ENSMUSG00000019905	Gprc6a	G protein-coupled receptor, family C, group 6, member A	-1.18247	1.34989e-05
ENSMUSG00000069208	Zfp825	zinc finger protein 825	-1.18084	0.000122298
ENSMUSG00000111443	Gm46123	predicted gene, 46123	-1.17929	0.037357
ENSMUSG00000017688	Hnf4g	hepatocyte nuclear factor 4, gamma	-1.16155	0.000979285
ENSMUSG00000046667	Rbm12b1	RNA binding motif protein 12 B1	-1.15899	0.0283725
ENSMUSG00000054074	Skida1	SKI/DACH domain containing 1	-1.15845	0.0449861
ENSMUSG00000043801	Oaz1-ps	ornithine decarboxylase antizyme 1, pseudogene	-1.1528	1.45096e-07
ENSMUSG00000030246	Ldhb	lactate dehydrogenase B	-1.15198	4.40902e-09
ENSMUSG00000033313	Fbxl8	F-box and leucine-rich repeat protein 8	-1.13982	0.00633376
ENSMUSG00000068854	H2bc21	H2B clustered histone 21	-1.13966	0.0421447
ENSMUSG00000056412	Psenen-ps	presenilin enhancer gamma secretase subunit, pseudogene	-1.13452	0.0443911
ENSMUSG00000046731	Kctd11	potassium channel tetramerisation domain containing 11	-1.13193	3.52296e-09
ENSMUSG00000019732	Calr3	calreticulin 3	-1.1317	0.0366462
ENSMUSG00000061410	Zcchc14	zinc finger, CCHC domain containing 14	-1.12655	0.00137416
ENSMUSG00000103103	4833445I07Rik	RIKEN cDNA 4833445I07 gene	-1.12582	0.0410235
ENSMUSG00000060678	H4c3	H4 clustered histone 3	-1.12543	1.54127e-06
ENSMUSG00000096006	Gm21596	predicted gene, 21596	-1.12407	0.0188301
ENSMUSG00000031919	Tmed6	transmembrane p24 trafficking protein 6	-1.12029	6.32011e-05
ENSMUSG00000087259	2610035D17Rik	RIKEN cDNA 2610035D17 gene	-1.11492	0.0158315
ENSMUSG00000020273	Papolg	poly(A) polymerase gamma	-1.10547	2.62697e-05
ENSMUSG00000029211	Gabra4	gamma-aminobutyric acid (GABA) A receptor, subunit alpha 4	-1.10489	0.0207054
ENSMUSG00000026027	Stradb	STE20-related kinase adaptor beta	-1.10305	6.25657e-06
ENSMUSG00000114251	Tmed10-ps	transmembrane p24 trafficking protein 10, pseudogene	-1.10298	7.59588e-09
ENSMUSG00000027132	Katnbl1	katanin p80 subunit B like 1	-1.10209	2.45119e-07
ENSMUSG00000062382	Ftl1-ps1	ferritin light polypeptide 1, pseudogene 1	-1.10158	0.00265001
ENSMUSG00000026417	Pigr	polymeric immunoglobulin receptor	-1.09365	0.0492545
ENSMUSG00000045464	2810002D19Rik	RIKEN cDNA 2810002D19 gene	-1.09264	0.0188481
ENSMUSG00000039481	Nrtn	neurturin	-1.08955	5.18309e-08
ENSMUSG00000022707	Gbe1	glucan (1,4-alpha-), branching enzyme 1	-1.08435	4.29499e-09
ENSMUSG00000000686	Abhd15	abhydrolase domain containing 15	-1.08294	7.66592e-11
ENSMUSG00000035235	Trim13	tripartite motif-containing 13	-1.08146	3.30398e-06
ENSMUSG00000030031	Kbtbd8	kelch repeat and BTB (POZ) domain containing 8	-1.07764	0.0492545
ENSMUSG00000114172	Gm36298	predicted gene, 36298	-1.06779	0.0105519
ENSMUSG00000020482	Ccdc117	coiled-coil domain containing 117	-1.06581	0.000159873
ENSMUSG00000062101	Zfp119b	zinc finger protein 119b	-1.06106	4.71577e-05
ENSMUSG00000078546	Zfp995	zinc finger protein 995	-1.06037	0.00550147
ENSMUSG00000039620	Trmt9b	tRNA methyltransferase 9B	-1.04073	0.000235621
ENSMUSG00000063052	Lrrc40	leucine rich repeat containing 40	-1.03957	5.59657e-10
ENSMUSG00000033316	Galnt9	polypeptide N-acetylgalactosaminyltransferase 9	-1.03924	0.000754813
ENSMUSG00000028088	Fmo5	flavin containing monooxygenase 5	-1.03866	0.000514108
ENSMUSG00000029088	Kcnip4	Kv channel interacting protein 4	-1.03645	0.0058927
ENSMUSG00000023122	Sult1c2	sulfotransferase family, cytosolic, 1C, member 2	-1.03572	0.0199284
ENSMUSG00000062743	Zfp677	zinc finger protein 677	-1.03541	6.8803e-05
ENSMUSG00000053347	Zfp943	zinc finger prtoein 943	-1.03186	4.7086e-07
ENSMUSG00000051705	Senp8	SUMO peptidase family member, NEDD8 specific	-1.03026	1.21733e-07
ENSMUSG00000028222	Calb1	calbindin 1	-1.02834	1.20752e-05
ENSMUSG00000059834	Sclt1	sodium channel and clathrin linker 1	-1.02798	0.000157539
ENSMUSG00000060397	Zfp128	zinc finger protein 128	-1.02615	0.0313018
ENSMUSG00000042340	Ctf1	cardiotrophin 1	-1.02407	0.0129278
ENSMUSG00000110781	Gm31992	predicted gene, 31992	-1.02221	0.011136
ENSMUSG00000028024	Enpep	glutamyl aminopeptidase	-1.0186	5.2682e-05
ENSMUSG00000067942	Zfp160	zinc finger protein 160	-1.01805	0.00181384
ENSMUSG00000035413	Tmem98	transmembrane protein 98	-1.01597	0.00662186
ENSMUSG00000026158	Ogfrl1	opioid growth factor receptor-like 1	-1.01467	0.0206809
ENSMUSG00000026904	Slc4a10	solute carrier family 4, sodium bicarbonate cotransporter-like, member 10	-1.01429	0.0084474
ENSMUSG00000035107	Dcbld2	discoidin, CUB and LCCL domain containing 2	-1.01049	0.016723
ENSMUSG00000108591	Particl	promoter of Mat2a antisense radiation induced circulating long non-coding RNA	-1.00983	0.0150194
ENSMUSG00000084910	C630043F03Rik	RIKEN cDNA C630043F03 gene	-1.00877	0.00863615
ENSMUSG00000056019	Zfp709	zinc finger protein 709	-1.0086	0.0406339
ENSMUSG00000048720	Tbc1d12	TBC1D12: TBC1 domain family, member 12	-1.00181	0.00279316
ENSMUSG00000039982	Dtx4	deltex 4, E3 ubiquitin ligase	-1.00052	0.0397429
ENSMUSG00000044477	Zfand3	zinc finger, AN1-type domain 3	1.00021	1.6042e-06
ENSMUSG00000018143	Mafk	v-maf musculoaponeurotic fibrosarcoma oncogene family, protein K (avian)	1.00191	0.000307151
ENSMUSG00000033434	Gtpbp6	GTP binding protein 6 (putative)	1.00933	0.0246665
ENSMUSG00000111375	Btbd8	BTB (POZ) domain containing 8	1.00977	0.0274865
ENSMUSG00000046269	Usp27x	ubiquitin specific peptidase 27, X chromosome	1.01627	0.0274738
ENSMUSG00000030683	Sez6l2	seizure related 6 homolog like 2	1.01754	3.63134e-38
ENSMUSG00000117592	Gm46603	predicted gene, 46603	1.01992	0.0119883
ENSMUSG00000044854	1700056E22Rik	RIKEN cDNA 1700056E22 gene	1.02013	0.0427157
ENSMUSG00000057604	Lmcd1	LIM and cysteine-rich domains 1	1.02014	0.0269839
ENSMUSG00000026176	Ctdsp1	CTD (carboxy-terminal domain, RNA polymerase II, polypeptide A) small phosphatase 1	1.021	0.000616659
ENSMUSG00000056501	Cebpb	CCAAT/enhancer binding protein (C/EBP), beta	1.02134	1.46078e-06
ENSMUSG00000039809	Gabbr2	gamma-aminobutyric acid (GABA) B receptor, 2	1.02188	1.51901e-06
ENSMUSG00000098534	Gm27167	predicted gene 27167	1.02244	0.0124844
ENSMUSG00000026932	Nacc2	nucleus accumbens associated 2, BEN and BTB (POZ) domain containing	1.02341	0.0386855
ENSMUSG00000024135	Srbd1	S1 RNA binding domain 1	1.02377	0.0012207
ENSMUSG00000020169	Best3	bestrophin 3	1.02452	0.00111652
ENSMUSG00000045983	Eif4g1	eukaryotic translation initiation factor 4, gamma 1	1.0246	1.70657e-11
ENSMUSG00000022895	Ets2	E26 avian leukemia oncogene 2, 3' domain	1.02522	0.0450748
ENSMUSG00000028035	Dnajb4	DnaJ heat shock protein family (Hsp40) member B4	1.02656	0.000327191
ENSMUSG00000030739	Myh14	myosin, heavy polypeptide 14	1.02667	0.00314615
ENSMUSG00000033467	Crlf2	cytokine receptor-like factor 2	1.02766	0.00127373
ENSMUSG00000055430	Nap1l5	nucleosome assembly protein 1-like 5	1.02807	8.71635e-05
ENSMUSG00000089809	Rasgef1b	RasGEF domain family, member 1B	1.02923	0.00621778
ENSMUSG00000022982	Sod1	superoxide dismutase 1, soluble	1.03295	1.78763e-30
ENSMUSG00000026819	Slc25a25	solute carrier family 25 (mitochondrial carrier, phosphate carrier), member 25	1.03385	2.66094e-05
ENSMUSG00000038013	Wipf2	WAS/WASL interacting protein family, member 2	1.03409	0.00145406
ENSMUSG00000048271	Rbm33	RNA binding motif protein 33	1.03826	3.34069e-08
ENSMUSG00000074405	Zfp865	zinc finger protein 865	1.03926	0.00882347
ENSMUSG00000038685	Rtel1	regulator of telomere elongation helicase 1	1.04098	0.0052806
ENSMUSG00000069633	Pex11g	peroxisomal biogenesis factor 11 gamma	1.04107	1.9096e-05
ENSMUSG00000013076	Amotl1	angiomotin-like 1	1.04259	0.00144567
ENSMUSG00000053754	Chd8	chromodomain helicase DNA binding protein 8	1.04548	1.25314e-05
ENSMUSG00000048489	Depp1	DEPP1 autophagy regulator	1.04938	0.0450387
ENSMUSG00000063952	Brpf3	bromodomain and PHD finger containing, 3	1.0537	0.000271068
ENSMUSG00000040459	Arglu1	arginine and glutamate rich 1	1.05395	3.06945e-07
ENSMUSG00000054027	Nt5dc3	5'-nucleotidase domain containing 3	1.05442	1.45088e-06
ENSMUSG00000022791	Tnk2	tyrosine kinase, non-receptor, 2	1.05837	0.000287425
ENSMUSG00000047909	Ankrd16	ankyrin repeat domain 16	1.06036	0.0217804
ENSMUSG00000041673	Lrrc18	leucine rich repeat containing 18	1.06408	0.0369452
ENSMUSG00000030539	Sema4b	sema domain, immunoglobulin domain (Ig), transmembrane domain (TM) and short cytoplasmic domain, (semaphorin) 4B	1.0711	3.0588e-09
ENSMUSG00000038241	Cep250	centrosomal protein 250	1.07839	0.00183343
ENSMUSG00000044813	Shb	src homology 2 domain-containing transforming protein B	1.08629	3.00394e-07
ENSMUSG00000038143	Stox2	storkhead box 2	1.09152	0.000170746
ENSMUSG00000020922	Lsm12	LSM12 homolog	1.10049	0.000148939
ENSMUSG00000027533	Fabp5	fatty acid binding protein 5, epidermal	1.10427	0.009974
ENSMUSG00000038384	Setd1b	SET domain containing 1B	1.11109	0.00915369
ENSMUSG00000058297	Spock2	sparc/osteonectin, cwcv and kazal-like domains proteoglycan 2	1.11256	1.88105e-20
ENSMUSG00000035640	Cbarp	calcium channel, voltage-dependent, beta subunit associated regulatory protein	1.11532	2.01649e-10
ENSMUSG00000028354	Fmn2	formin 2	1.11591	1.18845e-10
ENSMUSG00000030678	Maz	MYC-associated zinc finger protein (purine-binding transcription factor)	1.11969	1.98752e-15
ENSMUSG00000085133	B930095G15Rik	RIKEN cDNA B930095G15 gene	1.12	0.0165216
ENSMUSG00000018500	Adora2b	adenosine A2b receptor	1.12332	0.0413369
ENSMUSG00000028106	Rprd2	regulation of nuclear pre-mRNA domain containing 2	1.12443	2.53609e-10
ENSMUSG00000060950	Trmt61a	tRNA methyltransferase 61A	1.12468	0.000918073
ENSMUSG00000047123	Ticam1	toll-like receptor adaptor molecule 1	1.12561	0.0122985
ENSMUSG00000024327	Slc39a7	solute carrier family 39 (zinc transporter), member 7	1.12776	0.00120738
ENSMUSG00000037989	Wnk2	WNK lysine deficient protein kinase 2	1.12919	0.0237817
ENSMUSG00000003051	Elf3	E74-like factor 3	1.13007	0.000974268
ENSMUSG00000041375	Ccdc9	coiled-coil domain containing 9	1.13246	0.000569045
ENSMUSG00000029708	Gcc1	golgi coiled coil 1	1.13279	9.22577e-06
ENSMUSG00000023118	Sympk	symplekin	1.13384	6.31789e-22
ENSMUSG00000022500	Litaf	LPS-induced TN factor	1.13725	0.008168
ENSMUSG00000029406	Pitpnm2	phosphatidylinositol transfer protein, membrane-associated 2	1.13934	0.0104359
ENSMUSG00000046574	Prr12	proline rich 12	1.14366	0.00380463
ENSMUSG00000041895	Wipi1	WD repeat domain, phosphoinositide interacting 1	1.14793	2.12851e-06
ENSMUSG00000034295	Fhod3	formin homology 2 domain containing 3	1.14879	6.14057e-06
ENSMUSG00000013033	Adgrl1	adhesion G protein-coupled receptor L1	1.14966	2.22176e-10
ENSMUSG00000035890	Rnf126	ring finger protein 126	1.15087	3.20902e-12
ENSMUSG00000008348	Ubc	ubiquitin C	1.15276	3.02637e-09
ENSMUSG00000092060	Bend4	BEN domain containing 4	1.15329	0.0183832
ENSMUSG00000027331	Knstrn	kinetochore-localized astrin/SPAG5 binding	1.15644	0.0447499
ENSMUSG00000026204	Ptprn	protein tyrosine phosphatase, receptor type, N	1.15713	4.57553e-43
ENSMUSG00000019558	Slc6a8	solute carrier family 6 (neurotransmitter transporter, creatine), member 8	1.15759	2.06339e-09
ENSMUSG00000048078	Tenm4	teneurin transmembrane protein 4	1.15983	0.000838824
ENSMUSG00000043432	Leng9	leukocyte receptor cluster (LRC) member 9	1.15995	0.0011086
ENSMUSG00000056493	Foxk1	forkhead box K1	1.16093	0.000708722
ENSMUSG00000059248	Septin9	septin 9	1.16297	7.29908e-18
ENSMUSG00000008200	Fnbp4	formin binding protein 4	1.16328	7.73669e-05
ENSMUSG00000003752	Itpkc	inositol 1,4,5-trisphosphate 3-kinase C	1.16944	0.0169304
ENSMUSG00000034438	Gbp8	guanylate-binding protein 8	1.16977	5.11227e-05
ENSMUSG00000024206	Rfx2	regulatory factor X, 2 (influences HLA class II expression)	1.17074	6.33655e-05
ENSMUSG00000052310	Slc39a1	solute carrier family 39 (zinc transporter), member 1	1.1711	0.0158179
ENSMUSG00000030795	Fus	fused in sarcoma	1.17255	2.99036e-14
ENSMUSG00000030862	Cpxm2	carboxypeptidase X 2 (M14 family)	1.17308	0.000874675
ENSMUSG00000018476	Kdm6b	KDM1 lysine (K)-specific demethylase 6B	1.1745	0.0035268
ENSMUSG00000001910	Nacc1	nucleus accumbens associated 1, BEN and BTB (POZ) domain containing	1.17783	1.72775e-08
ENSMUSG00000020396	Nefh	neurofilament, heavy polypeptide	1.17887	0.00290374
ENSMUSG00000018427	Ypel2	yippee like 2	1.1827	8.62138e-11
ENSMUSG00000061603	Akap6	A kinase (PRKA) anchor protein 6	1.18761	0.00147426
ENSMUSG00000024754	Cemip2	cell migration inducing hyaluronidase 2	1.19366	0.00520292
ENSMUSG00000038855	Itpkb	inositol 1,4,5-trisphosphate 3-kinase B	1.19399	9.83225e-10
ENSMUSG00000031959	Wdr59	WD repeat domain 59	1.1975	0.00154748
ENSMUSG00000024366	Gfra3	glial cell line derived neurotrophic factor family receptor alpha 3	1.19862	0.000301487
ENSMUSG00000071757	Zhx2	zinc fingers and homeoboxes 2	1.20404	4.73932e-05
ENSMUSG00000091586	Cyp4f17	cytochrome P450, family 4, subfamily f, polypeptide 17	1.2059	0.000717924
ENSMUSG00000050737	Ptges	prostaglandin E synthase	1.20606	0.00118303
ENSMUSG00000020422	Tns3	tensin 3	1.20839	1.32227e-11
ENSMUSG00000052928	Ctif	CBP80/20-dependent translation initiation factor	1.20892	0.0280511
ENSMUSG00000037692	Ahdc1	AT hook, DNA binding motif, containing 1	1.20943	0.000930031
ENSMUSG00000023991	Foxp4	forkhead box P4	1.21509	5.08877e-17
ENSMUSG00000020121	Srgap1	SLIT-ROBO Rho GTPase activating protein 1	1.21654	0.0329288
ENSMUSG00000024500	Ppp2r2b	protein phosphatase 2, regulatory subunit B, beta	1.22492	0.00614616
ENSMUSG00000071713	Csf2rb	colony stimulating factor 2 receptor, beta, low-affinity (granulocyte-macrophage)	1.22621	0.000681419
ENSMUSG00000061607	Mdc1	mediator of DNA damage checkpoint 1	1.22724	1.57263e-06
ENSMUSG00000022390	Zc3h7b	zinc finger CCCH type containing 7B	1.22857	0.000476237
ENSMUSG00000040524	Zfp609	zinc finger protein 609	1.23211	7.94442e-07
ENSMUSG00000003541	Ier3	immediate early response 3	1.23669	0.00244329
ENSMUSG00000039835	Nhsl1	NHS-like 1	1.23838	7.17557e-05
ENSMUSG00000021067	Sav1	salvador family WW domain containing 1	1.2472	3.81564e-05
ENSMUSG00000018750	Zbtb4	zinc finger and BTB domain containing 4	1.25072	1.51461e-12
ENSMUSG00000063146	Clip2	CAP-GLY domain containing linker protein 2	1.25094	0.00248164
ENSMUSG00000021279	Cdc42bpb	CDC42 binding protein kinase beta	1.25626	8.6663e-08
ENSMUSG00000041930	Fam222a	family with sequence similarity 222, member A	1.25669	8.66626e-06
ENSMUSG00000018821	Avpi1	arginine vasopressin-induced 1	1.2578	3.75939e-05
ENSMUSG00000035164	Zc3h12c	zinc finger CCCH type containing 12C	1.25863	0.00115297
ENSMUSG00000058441	Panx2	pannexin 2	1.26052	0.0176935
ENSMUSG00000042766	Trim46	tripartite motif-containing 46	1.26548	0.00617409
ENSMUSG00000035372	1810055G02Rik	RIKEN cDNA 1810055G02 gene	1.26704	0.00260403
ENSMUSG00000046541	Zfp526	zinc finger protein 526	1.26887	0.0285042
ENSMUSG00000025981	Coq10b	coenzyme Q10B	1.27158	0.00544202
ENSMUSG00000022443	Myh9	myosin, heavy polypeptide 9, non-muscle	1.27391	2.51413e-14
ENSMUSG00000024101	Washc1	WASH complex subunit 1	1.28121	2.80158e-12
ENSMUSG00000036054	Sugp2	SURP and G patch domain containing 2	1.2949	0.00015266
ENSMUSG00000001521	Tulp3	tubby-like protein 3	1.29566	2.62298e-07
ENSMUSG00000020961	Ston2	stonin 2	1.3073	0.0180789
ENSMUSG00000028977	Casz1	castor zinc finger 1	1.30877	7.80476e-06
ENSMUSG00000040761	Spen	spen family transcription repressor	1.31939	4.9729e-13
ENSMUSG00000054509	Parp4	poly (ADP-ribose) polymerase family, member 4	1.32204	0.000573958
ENSMUSG00000022010	Tsc22d1	TSC22 domain family, member 1	1.32208	4.09079e-08
ENSMUSG00000021268	Meg3	maternally expressed 3	1.32359	6.55691e-06
ENSMUSG00000006356	Crip2	cysteine rich protein 2	1.32433	0.047173
ENSMUSG00000050069	Grem2	gremlin 2, DAN family BMP antagonist	1.32931	1.98915e-09
ENSMUSG00000060224	Pyroxd2	pyridine nucleotide-disulphide oxidoreductase domain 2	1.33516	0.0124492
ENSMUSG00000044927	H1f10	H1.10 linker histone	1.33659	0.000137405
ENSMUSG00000062825	Actg1	actin, gamma, cytoplasmic 1	1.33678	0.000172721
ENSMUSG00000062785	Kcnc3	potassium voltage gated channel, Shaw-related subfamily, member 3	1.34152	0.0181632
ENSMUSG00000046733	Gprc5a	G protein-coupled receptor, family C, group 5, member A	1.34156	0.0203692
ENSMUSG00000092021	Gbp11	guanylate binding protein 11	1.34324	0.0360228
ENSMUSG00000024862	Klc2	kinesin light chain 2	1.34504	9.30896e-11
ENSMUSG00000032034	Kcnj5	potassium inwardly-rectifying channel, subfamily J, member 5	1.34507	0.000383063
ENSMUSG00000036432	Siah2	siah E3 ubiquitin protein ligase 2	1.34759	3.34838e-08
ENSMUSG00000048481	Mypop	Myb-related transcription factor, partner of profilin	1.34915	7.4426e-05
ENSMUSG00000020205	Phlda1	pleckstrin homology like domain, family A, member 1	1.35921	0.00507011
ENSMUSG00000022440	C1qtnf6	C1q and tumor necrosis factor related protein 6	1.35967	0.00315027
ENSMUSG00000040481	Bptf	bromodomain PHD finger transcription factor	1.36214	3.1394e-09
ENSMUSG00000022508	Bcl6	B cell leukemia/lymphoma 6	1.36549	0.0485166
ENSMUSG00000039989	Cbx4	chromobox 4	1.3674	2.67736e-06
ENSMUSG00000038539	Atf5	activating transcription factor 5	1.3733	1.16102e-17
ENSMUSG00000005580	Adcy9	adenylate cyclase 9	1.37776	5.52231e-18
ENSMUSG00000030203	Dusp16	dual specificity phosphatase 16	1.37866	0.00252698
ENSMUSG00000021820	Camk2g	calcium/calmodulin-dependent protein kinase II gamma	1.38538	0.0452309
ENSMUSG00000053877	Srcap	Snf2-related CREBBP activator protein	1.38558	0.0221356
ENSMUSG00000046213	Cym	chymosin	1.39115	0.000203725
ENSMUSG00000055125	M5C1000I18Rik	RIKEN cDNA M5C1000I18 gene	1.3942	0.00757218
ENSMUSG00000024548	Setbp1	SET binding protein 1	1.39475	0.0129203
ENSMUSG00000075585	6330403L08Rik	RIKEN cDNA 6330403L08 gene	1.39625	0.01851
ENSMUSG00000042606	Hirip3	HIRA interacting protein 3	1.39749	0.00553238
ENSMUSG00000036565	Ttyh3	tweety family member 3	1.39769	0.0274865
ENSMUSG00000027324	Rpusd2	RNA pseudouridylate synthase domain containing 2	1.39832	0.0131869
ENSMUSG00000072235	Tuba1a	tubulin, alpha 1A	1.40113	4.76693e-16
ENSMUSG00000024186	Rgs11	regulator of G-protein signaling 11	1.40555	0.000100447
ENSMUSG00000022185	Acin1	apoptotic chromatin condensation inducer 1	1.40785	2.70433e-18
ENSMUSG00000042423	Fbrs	fibrosin	1.41533	8.71107e-06
ENSMUSG00000022054	Nefm	neurofilament, medium polypeptide	1.42191	0.000623359
ENSMUSG00000035203	Epn1	epsin 1	1.42649	7.60716e-33
ENSMUSG00000007476	Lrrc8a	leucine rich repeat containing 8A VRAC subunit A	1.42927	0.00122468
ENSMUSG00000118672	Muc4	mucin 4	1.42935	2.47315e-07
ENSMUSG00000037103	Dcaf15	DDB1 and CUL4 associated factor 15	1.43285	0.000254592
ENSMUSG00000032312	Csk	c-src tyrosine kinase	1.43408	3.79555e-21
ENSMUSG00000063727	Tnfrsf11b	tumor necrosis factor receptor superfamily, member 11b (osteoprotegerin)	1.43623	5.31974e-07
ENSMUSG00000051790	Nlgn2	neuroligin 2	1.44565	0.00217174
ENSMUSG00000054717	Hmgb2	high mobility group box 2	1.45487	0.000203957
ENSMUSG00000005442	Cic	capicua transcriptional repressor	1.45885	1.37444e-09
ENSMUSG00000035357	Pdzrn3	PDZ domain containing RING finger 3	1.46186	0.00317025
ENSMUSG00000025192	Entpd7	ectonucleoside triphosphate diphosphohydrolase 7	1.46661	9.27272e-15
ENSMUSG00000074923	Pak6	p21 (RAC1) activated kinase 6	1.46889	0.00437383
ENSMUSG00000097124	A530020G20Rik	RIKEN cDNA A530020G20 gene	1.47463	0.0185216
ENSMUSG00000025408	Ddit3	DNA-damage inducible transcript 3	1.47771	1.86324e-06
ENSMUSG00000053175	Bcl3	B cell leukemia/lymphoma 3	1.47937	0.000267826
ENSMUSG00000022228	Zscan26	zinc finger and SCAN domain containing 26	1.47959	4.04996e-06
ENSMUSG00000072214	Septin5	septin 5	1.48076	6.53237e-05
ENSMUSG00000069114	Zbtb10	zinc finger and BTB domain containing 10	1.48477	0.000594333
ENSMUSG00000059900	Tmem40	transmembrane protein 40	1.48485	0.0425023
ENSMUSG00000058966	Tlcd3b	TLC domain containing 3B	1.48821	0.0190903
ENSMUSG00000008384	Sertad1	SERTA domain containing 1	1.49567	5.18415e-07
ENSMUSG00000029478	Ncor2	nuclear receptor co-repressor 2	1.50075	4.04532e-12
ENSMUSG00000027422	Rrbp1	ribosome binding protein 1	1.51058	3.13975e-14
ENSMUSG00000032265	Tent5a	terminal nucleotidyltransferase 5A	1.51361	1.60148e-06
ENSMUSG00000000384	Tbrg4	transforming growth factor beta regulated gene 4	1.51438	9.3264e-07
ENSMUSG00000075705	Msrb1	methionine sulfoxide reductase B1	1.51762	4.34847e-08
ENSMUSG00000097195	Snhg5	small nucleolar RNA host gene 5	1.51962	0.00459916
ENSMUSG00000025612	Bach1	BTB and CNC homology 1, basic leucine zipper transcription factor 1	1.52514	0.00155925
ENSMUSG00000040734	Ppp1r13l	protein phosphatase 1, regulatory subunit 13 like	1.52793	0.000824724
ENSMUSG00000047843	Bri3	brain protein I3	1.53428	1.14503e-07
ENSMUSG00000071073	Lrrc73	leucine rich repeat containing 73	1.54529	4.00946e-08
ENSMUSG00000040502	Marchf9	membrane associated ring-CH-type finger 9	1.54573	3.03361e-17
ENSMUSG00000044349	Snhg11	small nucleolar RNA host gene 11	1.54773	0.00648559
ENSMUSG00000026185	Igfbp5	insulin-like growth factor binding protein 5	1.54808	4.77184e-09
ENSMUSG00000037907	Ankrd13b	ankyrin repeat domain 13b	1.54913	7.73824e-07
ENSMUSG00000033826	Dnah8	dynein, axonemal, heavy chain 8	1.5559	0.0126537
ENSMUSG00000038894	Irs2	insulin receptor substrate 2	1.58892	0.000238633
ENSMUSG00000038352	Arl5c	ADP-ribosylation factor-like 5C	1.59375	0.0377425
ENSMUSG00000061589	Dot1l	DOT1-like, histone H3 methyltransferase (S. cerevisiae)	1.6101	4.29499e-09
ENSMUSG00000024552	Slc14a2	solute carrier family 14 (urea transporter), member 2	1.6147	0.00067802
ENSMUSG00000002006	Pdzd4	PDZ domain containing 4	1.61686	0.00879802
ENSMUSG00000049382	Krt8	keratin 8	1.61777	0.000301708
ENSMUSG00000045176	Borcs6	BLOC-1 related complex subunit 6	1.62453	4.34176e-11
ENSMUSG00000056749	Nfil3	nuclear factor, interleukin 3, regulated	1.62934	0.00389358
ENSMUSG00000024442	Dele1	DAP3 binding cell death enhancer 1	1.63361	2.37957e-42
ENSMUSG00000027829	Ccnl1	cyclin L1	1.63423	2.6877e-09
ENSMUSG00000040152	Thbs1	thrombospondin 1	1.63729	0.00959431
ENSMUSG00000021190	Lgmn	legumain	1.64019	4.19298e-05
ENSMUSG00000036057	Ptpn23	protein tyrosine phosphatase, non-receptor type 23	1.64391	7.62069e-11
ENSMUSG00000021453	Gadd45g	growth arrest and DNA-damage-inducible 45 gamma	1.64775	1.44965e-17
ENSMUSG00000035202	Lars2	leucyl-tRNA synthetase, mitochondrial	1.65643	9.66057e-92
ENSMUSG00000000282	Mnt	max binding protein	1.65827	3.68635e-09
ENSMUSG00000055866	Per2	period circadian clock 2	1.66085	4.1139e-05
ENSMUSG00000034993	Vat1	vesicle amine transport 1	1.66791	4.34679e-09
ENSMUSG00000071176	Arhgef10	Rho guanine nucleotide exchange factor (GEF) 10	1.67235	0.0386702
ENSMUSG00000041773	Enc1	ectodermal-neural cortex 1	1.67496	6.59099e-05
ENSMUSG00000011179	Odc1	ornithine decarboxylase, structural 1	1.68039	1.43961e-11
ENSMUSG00000041301	Cftr	cystic fibrosis transmembrane conductance regulator	1.68408	0.00236512
ENSMUSG00000071076	Jund	jun D proto-oncogene	1.68439	6.6376e-20
ENSMUSG00000033420	Antxr1	anthrax toxin receptor 1	1.68442	0.000403552
ENSMUSG00000113211	4921525O09Rik	RIKEN cDNA 4921525O09 gene	1.69441	1.47934e-06
ENSMUSG00000032501	Trib1	tribbles pseudokinase 1	1.6954	9.89281e-05
ENSMUSG00000063382	Bcl9l	B cell CLL/lymphoma 9-like	1.6968	2.38014e-07
ENSMUSG00000015143	Actn1	actinin, alpha 1	1.69908	1.03288e-20
ENSMUSG00000020941	Map3k14	mitogen-activated protein kinase kinase kinase 14	1.70037	8.44223e-05
ENSMUSG00000018559	Ctdnep1	CTD nuclear envelope phosphatase 1	1.70169	3.43334e-50
ENSMUSG00000008136	Fhl2	four and a half LIM domains 2	1.71419	0.00325944
ENSMUSG00000029869	Ephb6	Eph receptor B6	1.71959	1.0731e-07
ENSMUSG00000074794	Arrdc3	arrestin domain containing 3	1.72434	0.000474325
ENSMUSG00000036948	Trappc14	trafficking protein particle complex 14	1.72756	1.0263e-09
ENSMUSG00000048644	Ctxn1	cortexin 1	1.72779	0.000456367
ENSMUSG00000070808	Bicra	BRD4 interacting chromatin remodeling complex associated protein	1.7342	4.91144e-05
ENSMUSG00000019768	Esr1	estrogen receptor 1 (alpha)	1.74084	0.000154255
ENSMUSG00000120530	ENSMUSG00000120530	novel transcript	1.7455	0.000434868
ENSMUSG00000071862	Lrrtm2	leucine rich repeat transmembrane neuronal 2	1.74829	1.94621e-07
ENSMUSG00000092341	Malat1	metastasis associated lung adenocarcinoma transcript 1 (non-coding RNA)	1.76208	1.50733e-26
ENSMUSG00000001473	Tubb6	tubulin, beta 6 class V	1.76832	0.000392942
ENSMUSG00000026950	Neb	nebulin	1.77105	4.04996e-06
ENSMUSG00000025867	Cplx2	complexin 2	1.7762	9.36859e-52
ENSMUSG00000037622	Wdtc1	WD and tetratricopeptide repeats 1	1.77895	2.42301e-08
ENSMUSG00000016028	Celsr1	cadherin, EGF LAG seven-pass G-type receptor 1	1.79141	0.0026182
ENSMUSG00000002983	Relb	avian reticuloendotheliosis viral (v-rel) oncogene related B	1.80345	0.00377161
ENSMUSG00000058056	Palld	palladin, cytoskeletal associated protein	1.80829	5.27094e-07
ENSMUSG00000085396	Firre	functional intergenic repeating RNA element	1.81075	0.00252698
ENSMUSG00000032564	Cpne4	copine IV	1.81655	5.16354e-06
ENSMUSG00000052374	Actn2	actinin alpha 2	1.82944	0.0366802
ENSMUSG00000002250	Ppard	peroxisome proliferator activator receptor delta	1.82972	0.00266333
ENSMUSG00000038797	Zscan2	zinc finger and SCAN domain containing 2	1.83457	0.0157943
ENSMUSG00000089706	B230216N24Rik	RIKEN cDNA B230216N24 gene	1.84534	0.0403555
ENSMUSG00000083695	Rnf138rt1	ring finger protein 138, retrogene 1	1.85738	9.01323e-06
ENSMUSG00000032593	Amigo3	adhesion molecule with Ig like domain 3	1.87083	7.80476e-06
ENSMUSG00000017144	Rnd3	Rho family GTPase 3	1.87931	0.0178493
ENSMUSG00000018547	Pip4k2b	phosphatidylinositol-5-phosphate 4-kinase, type II, beta	1.88319	0.0345706
ENSMUSG00000070420	Zscan25	zinc finger and SCAN domain containing 25	1.89587	0.00111919
ENSMUSG00000027349	Fam98b	family with sequence similarity 98, member B	1.89664	1.70666e-09
ENSMUSG00000035493	Tgfbi	transforming growth factor, beta induced	1.89719	0.00399013
ENSMUSG00000018899	Irf1	interferon regulatory factor 1	1.9033	0.000198181
ENSMUSG00000039552	Rsph4a	radial spoke head 4 homolog A (Chlamydomonas)	1.90991	0.00274834
ENSMUSG00000096768	Gm47283	predicted gene, 47283	1.91324	0.0374267
ENSMUSG00000029298	Gbp9	guanylate-binding protein 9	1.92147	0.00064428
ENSMUSG00000031530	Dusp4	dual specificity phosphatase 4	1.94143	2.84265e-05
ENSMUSG00000021701	Plk2	polo like kinase 2	1.95253	9.73372e-06
ENSMUSG00000032010	Usp2	ubiquitin specific peptidase 2	1.95705	8.15432e-05
ENSMUSG00000001508	Sgca	sarcoglycan, alpha (dystrophin-associated glycoprotein)	1.97585	0.0377774
ENSMUSG00000040125	Gpr26	G protein-coupled receptor 26	1.99685	2.1538e-05
ENSMUSG00000024456	Diaph1	diaphanous related formin 1	2.00681	5.79797e-18
ENSMUSG00000001300	Efnb2	ephrin B2	2.01058	0.00263743
ENSMUSG00000015605	Srf	serum response factor	2.01088	0.00252698
ENSMUSG00000029608	Rph3a	rabphilin 3A	2.02637	0.000436737
ENSMUSG00000028840	Zfp593	zinc finger protein 593	2.02959	0.0479495
ENSMUSG00000063260	Syt10	synaptotagmin X	2.03892	0.0204704
ENSMUSG00000020108	Ddit4	DNA-damage-inducible transcript 4	2.04057	5.61294e-07
ENSMUSG00000055976	Cldn23	claudin 23	2.05019	2.06339e-09
ENSMUSG00000028901	Gmeb1	glucocorticoid modulatory element binding protein 1	2.05627	0.00108828
ENSMUSG00000034382	AI661453	expressed sequence AI661453	2.07506	4.6836e-10
ENSMUSG00000042275	Pelo	pelota mRNA surveillance and ribosome rescue factor	2.08581	0.00355181
ENSMUSG00000048537	Phldb1	pleckstrin homology like domain, family B, member 1	2.09962	0.000821079
ENSMUSG00000005483	Dnajb1	DnaJ heat shock protein family (Hsp40) member B1	2.10129	9.71768e-06
ENSMUSG00000037887	Dusp8	dual specificity phosphatase 8	2.10185	0.000406049
ENSMUSG00000038020	Rapgefl1	Rap guanine nucleotide exchange factor (GEF)-like 1	2.1023	1.2177e-05
ENSMUSG00000048385	Scrt1	scratch family zinc finger 1	2.11391	0.000101491
ENSMUSG00000120012	ENSMUSG00000120012	novel transcript	2.14431	0.00684059
ENSMUSG00000086905	Gm13716	predicted gene 13716	2.14453	0.000104878
ENSMUSG00000000078	Klf6	Kruppel-like factor 6	2.15711	8.41823e-13
ENSMUSG00000020272	Stk10	serine/threonine kinase 10	2.19072	0.00703111
ENSMUSG00000056350	Krtap13-1	keratin associated protein 13-1	2.19396	0.00198634
ENSMUSG00000034765	Dusp5	dual specificity phosphatase 5	2.21313	3.30102e-05
ENSMUSG00000029352	Crybb3	crystallin, beta B3	2.22688	0.0136313
ENSMUSG00000016349	Eef1a2	eukaryotic translation elongation factor 1 alpha 2	2.22907	0.0115612
ENSMUSG00000019850	Tnfaip3	tumor necrosis factor, alpha-induced protein 3	2.23226	0.0156002
ENSMUSG00000021258	Ccnk	cyclin K	2.24911	5.23639e-24
ENSMUSG00000043091	Tuba1c	tubulin, alpha 1C	2.25181	4.43948e-11
ENSMUSG00000031762	Mt2	metallothionein 2	2.25312	5.03589e-05
ENSMUSG00000059842	Zfp341	zinc finger protein 341	2.26825	0.00249128
ENSMUSG00000074406	Zfp628	zinc finger protein 628	2.27133	7.79455e-16
ENSMUSG00000049823	Zbtb12	zinc finger and BTB domain containing 12	2.28106	0.0102923
ENSMUSG00000024393	Prrc2a	proline-rich coiled-coil 2A	2.30519	3.57409e-44
ENSMUSG00000042507	Mideas	mitotic deacetylase associated SANT domain protein	2.31511	1.09401e-07
ENSMUSG00000030103	Bhlhe40	basic helix-loop-helix family, member e40	2.33606	2.54427e-05
ENSMUSG00000025409	Mbd6	methyl-CpG binding domain protein 6	2.36237	1.92673e-41
ENSMUSG00000063632	Sox11	SRY (sex determining region Y)-box 11	2.3688	0.0195968
ENSMUSG00000024235	Map3k8	mitogen-activated protein kinase kinase kinase 8	2.37345	0.00277142
ENSMUSG00000047281	Sfn	stratifin	2.38692	0.000370967
ENSMUSG00000024063	Lbh	limb-bud and heart	2.39552	7.39831e-35
ENSMUSG00000038530	Rgs4	regulator of G-protein signaling 4	2.39982	7.27578e-42
ENSMUSG00000047990	C2cd4a	C2 calcium-dependent domain containing 4A	2.40383	1.36975e-21
ENSMUSG00000029027	Dffb	DNA fragmentation factor, beta subunit	2.40653	4.99312e-07
ENSMUSG00000091971	Hspa1a	heat shock protein 1A	2.41002	0.00369845
ENSMUSG00000099207	Gm10637	predicted gene 10637	2.43392	0.0463372
ENSMUSG00000020423	Btg2	BTG anti-proliferation factor 2	2.47313	3.20902e-12
ENSMUSG00000054364	Rhob	ras homolog family member B	2.47486	2.73185e-31
ENSMUSG00000040435	Ppp1r15a	protein phosphatase 1, regulatory subunit 15A	2.49706	4.24158e-26
ENSMUSG00000091956	C2cd4b	C2 calcium-dependent domain containing 4B	2.53056	7.20832e-21
ENSMUSG00000039384	Dusp10	dual specificity phosphatase 10	2.53513	0.00538489
ENSMUSG00000049892	Rasd1	RAS, dexamethasone-induced 1	2.55887	7.76869e-07
ENSMUSG00000041115	Iqsec2	IQ motif and Sec7 domain 2	2.56305	1.21131e-09
ENSMUSG00000041235	Chd7	chromodomain helicase DNA binding protein 7	2.56459	4.42951e-05
ENSMUSG00000105434	Gm43359	predicted gene 43359	2.57562	0.00685061
ENSMUSG00000028214	Gem	GTP binding protein (gene overexpressed in skeletal muscle)	2.58007	0.000221381
ENSMUSG00000043889	Gm8399	predicted gene 8399	2.71301	0.000643684
ENSMUSG00000078252	Krtap17-1	keratin associated protein 17-1	2.74703	0.0199014
ENSMUSG00000035356	Nfkbiz	nuclear factor of kappa light polypeptide gene enhancer in B cells inhibitor, zeta	2.86075	1.45338e-05
ENSMUSG00000090877	Hspa1b	heat shock protein 1B	2.88026	0.000356616
ENSMUSG00000086324	Gm15564	predicted gene 15564	2.94865	2.64202e-113
ENSMUSG00000035621	Midn	midnolin	2.95905	7.16277e-05
ENSMUSG00000046922	Gpr6	G protein-coupled receptor 6	2.97404	4.91697e-05
ENSMUSG00000039942	Ptger4	prostaglandin E receptor 4 (subtype EP4)	3.03903	0.000122298
ENSMUSG00000024190	Dusp1	dual specificity phosphatase 1	3.04453	1.48398e-07
ENSMUSG00000037447	Arid5a	AT rich interactive domain 5A (MRF1-like)	3.14932	0.000234959
ENSMUSG00000098973	Mir6236	microRNA 6236	3.15429	4.18089e-148
ENSMUSG00000120130	ENSMUSG00000120130	novel transcript	3.15615	0.03835
ENSMUSG00000082791	Gm4875	predicted gene 4875	3.20586	0.00736622
ENSMUSG00000000120	Ngfr	nerve growth factor receptor (TNFR superfamily, member 16)	3.24044	1.76699e-20
ENSMUSG00000045502	Hcar2	hydroxycarboxylic acid receptor 2	3.2428	1.26162e-09
ENSMUSG00000052837	Junb	jun B proto-oncogene	3.31836	3.16663e-73
ENSMUSG00000024042	Sik1	salt inducible kinase 1	3.32241	1.68725e-06
ENSMUSG00000092274	Neat1	nuclear paraspeckle assembly transcript 1 (non-protein coding)	3.35002	8.41945e-25
ENSMUSG00000053113	Socs3	suppressor of cytokine signaling 3	3.3808	8.00203e-34
ENSMUSG00000042622	Maff	v-maf musculoaponeurotic fibrosarcoma oncogene family, protein F (avian)	3.40027	3.37559e-09
ENSMUSG00000053560	Ier2	immediate early response 2	3.41293	3.15665e-16
ENSMUSG00000024014	Pim1	proviral integration site 1	3.4251	0.000109987
ENSMUSG00000121503	H2-K2	histocompatibility 2, K region locus 2	3.45346	0.0012207
ENSMUSG00000030159	Clec1b	C-type lectin domain family 1, member b	3.55473	0.015572
ENSMUSG00000052684	Jun	jun proto-oncogene	3.59144	7.95858e-17
ENSMUSG00000038418	Egr1	early growth response 1	3.61191	4.35212e-16
ENSMUSG00000058357	Gm6612	predicted gene 6612	3.65339	0.010123
ENSMUSG00000067629	Syngap1	synaptic Ras GTPase activating protein 1 homolog (rat)	3.68812	0.00518628
ENSMUSG00000095562	Gm55594	predicted gene, 55594	3.72544	0.000367477
ENSMUSG00000020893	Per1	period circadian clock 1	3.824	1.41549e-06
ENSMUSG00000032515	Csrnp1	cysteine-serine-rich nuclear protein 1	3.8391	9.29235e-09
ENSMUSG00000055148	Klf2	Kruppel-like factor 2 (lung)	3.85864	1.05093e-06
ENSMUSG00000045903	Npas4	neuronal PAS domain protein 4	3.88265	1.46535e-12
ENSMUSG00000109904	Gm45819	predicted gene 45819	3.9015	0.0156349
ENSMUSG00000021250	Fos	FBJ osteosarcoma oncogene	3.97763	8.09482e-11
ENSMUSG00000097743	Gm16973	predicted gene, 16973	3.99234	0.00146058
ENSMUSG00000044786	Zfp36	zinc finger protein 36	4.03428	1.09228e-69
ENSMUSG00000082145	Gm12312	predicted gene 12312	4.08068	0.00760712
ENSMUSG00000039253	Fn3krp	fructosamine 3 kinase related protein	4.24825	3.3539e-06
ENSMUSG00000002459	Rgs20	regulator of G-protein signaling 20	4.31084	0.0324627
ENSMUSG00000029135	Fosl2	fos-like antigen 2	4.44858	3.35111e-05
ENSMUSG00000091957	Rps2-ps10	ribosomal protein S2, pseudogene 10	4.51884	0.00469296
ENSMUSG00000062044	Lmtk3	lemur tyrosine kinase 3	4.67512	0.0246665
ENSMUSG00000071341	Egr4	early growth response 4	4.72144	0.0008072
ENSMUSG00000051212	Gpr183	G protein-coupled receptor 183	4.74988	0.0499645
ENSMUSG00000024912	Fosl1	fos-like antigen 1	4.88633	0.0288137
ENSMUSG00000037868	Egr2	early growth response 2	4.9093	0.000275657
ENSMUSG00000030208	Emp1	epithelial membrane protein 1	5.03226	0.00909193
ENSMUSG00000085881	Gm15912	predicted gene 15912	5.16441	0.0215023
ENSMUSG00000033730	Egr3	early growth response 3	5.32556	0.00388395
ENSMUSG00000023034	Nr4a1	nuclear receptor subfamily 4, group A, member 1	5.37366	4.22743e-09
ENSMUSG00000022602	Arc	activity regulated cytoskeletal-associated protein	5.44111	6.25153e-24
ENSMUSG00000042677	Zc3h12a	zinc finger CCCH type containing 12A	5.69008	0.00504202
ENSMUSG00000102856	Gm37084	predicted gene, 37084	6.04356	0.00492943
ENSMUSG00000022416	Cacna1i	calcium channel, voltage-dependent, alpha 1I subunit	6.33545	0.00600131
ENSMUSG00000084792	1700056N10Rik	RIKEN cDNA 1700056N10 gene	6.33571	0.00694111
ENSMUSG00000064179	Tnnt1	troponin T1, skeletal, slow	6.44769	0.0190369
ENSMUSG00000003545	Fosb	FBJ osteosarcoma oncogene B	6.52923	1.09087e-29
ENSMUSG00000107875	Gm54719	predicted gene, 54719	6.53679	0.00576773
ENSMUSG00000045672	Col27a1	collagen, type XXVII, alpha 1	6.57847	0.00198634
ENSMUSG00000021614	Vcan	versican	6.58543	0.00134988
ENSMUSG00000060882	Kcnd2	potassium voltage-gated channel, Shal-related family, member 2	6.60902	0.0451071
ENSMUSG00000103039	Gm37123	predicted gene, 37123	6.65769	0.00209664
ENSMUSG00000049649	Gpr3	G-protein coupled receptor 3	6.74738	0.0307246
ENSMUSG00000110317	Gm45250	predicted gene 45250	6.78836	0.0253979
ENSMUSG00000019893	Ros1	Ros1 proto-oncogene	6.81127	0.0012728
ENSMUSG00000117786	Gm10503	predicted gene 10503	6.81919	0.00633376
ENSMUSG00000111037	Gm47235	predicted gene, 47235	6.84475	0.00107754
ENSMUSG00000024172	St6gal2	beta galactoside alpha 2,6 sialyltransferase 2	7.17885	0.000161157
ENSMUSG00000026628	Atf3	activating transcription factor 3	7.22929	4.39068e-14
ENSMUSG00000003032	Klf4	Kruppel-like factor 4 (gut)	7.34725	3.77595e-42
ENSMUSG00000022893	Adamts1	a disintegrin-like and metallopeptidase (reprolysin type) with thrombospondin type 1 motif, 1	7.35251	0.000411963
ENSMUSG00000040380	Cbln3	cerebellin 3 precursor protein	7.63187	0.00115297
ENSMUSG00000045587	Lypd10	Ly6/PLAUR domain containing 10	21.7121	4.41556e-13
ENSMUSG00000040140	Tdrd6	tudor domain containing 6	22.5954	4.25177e-09
ENSMUSG00000117835	Gm50250	predicted gene, 50250	25.0416	4.43948e-11

## Sheet: Chd3+4Db_Entire Gene list
geneId	logFcValue	logProbValue	probValue	logProbFiniteValue	logFcClampedValue
ENSMUSG00000109209	-9.4504	2.5667	0.00271206	2.5667	-7
ENSMUSG00000001493	-9.42458	11.2768	5.28677e-12	11.2768	-7
ENSMUSG00000055235	-8.8208	9.07114	8.48914e-10	9.07114	-7
ENSMUSG00000086708	-8.06207	8.0277	9.38202e-09	8.0277	-7
ENSMUSG00000029608	-7.71758	6.71097	1.94551e-07	6.71097	-7
ENSMUSG00000060183	-7.30266	5.10133	7.91899e-06	5.10133	-7
ENSMUSG00000109262	-6.98866	4.87917	1.32077e-05	4.87917	-6.98866
ENSMUSG00000030230	-6.67535	2.80663	0.00156089	2.80663	-6.67535
ENSMUSG00000029847	-6.6706	3.78303	0.000164804	3.78303	-6.6706
ENSMUSG00000063260	-6.65932	3.65357	0.00022204	3.65357	-6.65932
ENSMUSG00000116965	-6.49435	3.93069	0.000117302	3.93069	-6.49435
ENSMUSG00000081225	-6.47209	2.07366	0.0084399	2.07366	-6.47209
ENSMUSG00000040046	-6.4072	149.461	3.45722e-150	149.461	-6.4072
ENSMUSG00000037999	-6.37159	1.52726	0.0296991	1.52726	-6.37159
ENSMUSG00000050818	-6.09255	9.821	1.51007e-10	9.821	-6.09255
ENSMUSG00000029868	-6.08767	1.71869	0.0191121	1.71869	-6.08767
ENSMUSG00000039714	-6.06102	1.89642	0.0126936	1.89642	-6.06102
ENSMUSG00000027386	-5.98023	1.76705	0.0170984	1.76705	-5.98023
ENSMUSG00000057173	-5.95527	1.83125	0.0147487	1.83125	-5.95527
ENSMUSG00000041293	-5.94174	1.24762	0.056543	1.24762	-5.94174
ENSMUSG00000026787	-5.91128	1.93578	0.0115938	1.93578	-5.91128
ENSMUSG00000028655	-5.8677	1.2173	0.060632	1.2173	-5.8677
ENSMUSG00000118837	-5.86358	2.94691	0.00113004	2.94691	-5.86358
ENSMUSG00000114121	-5.81441	2.16882	0.00677917	2.16882	-5.81441
ENSMUSG00000027718	-5.77749	1.12927	0.0742559	1.12927	-5.77749
ENSMUSG00000027855	-5.74581	1.75218	0.0176938	1.75218	-5.74581
ENSMUSG00000032057	-5.64937	2.53985	0.00288502	2.53985	-5.64937
ENSMUSG00000098470	-5.57193	1.07037	0.085042	1.07037	-5.57193
ENSMUSG00000087333	-5.52047	1.05109	0.0889027	1.05109	-5.52047
ENSMUSG00000078773	-5.44657	0.879032	0.13212	0.879032	-5.44657
ENSMUSG00000084938	-5.42943	1.50972	0.0309226	1.50972	-5.42943
ENSMUSG00000046192	-5.4263	0.974925	0.105944	0.974925	-5.4263
ENSMUSG00000046213	-5.41427	8.44785	3.56576e-09	8.44785	-5.41427
ENSMUSG00000070683	-5.40672	1.48339	0.0328557	1.48339	-5.40672
ENSMUSG00000076435	-5.36773	7.77836	1.66585e-08	7.77836	-5.36773
ENSMUSG00000087029	-5.31929	1.44233	0.0361136	1.44233	-5.31929
ENSMUSG00000115164	-5.28442	2.12566	0.00748764	2.12566	-5.28442
ENSMUSG00000109765	-5.27156	0.893466	0.127801	0.893466	-5.27156
ENSMUSG00000044338	-5.27005	0.606407	0.24751	0.606407	-5.27005
ENSMUSG00000120667	-5.26317	1.3955	0.0402257	1.3955	-5.26317
ENSMUSG00000030054	-5.26269	2.13246	0.00737115	2.13246	-5.26269
ENSMUSG00000049872	-5.26152	0.912653	0.122278	0.912653	-5.26152
ENSMUSG00000050944	-5.20473	1.41442	0.0385102	1.41442	-5.20473
ENSMUSG00000086262	-5.18673	1.30942	0.0490431	1.30942	-5.18673
ENSMUSG00000025432	-5.18127	2.16381	0.00685783	2.16381	-5.18127
ENSMUSG00000107810	-5.17609	1.29607	0.0505742	1.29607	-5.17609
ENSMUSG00000108372	-5.1533	0.764343	0.172051	0.764343	-5.1533
ENSMUSG00000030111	-5.14149	0.437877	0.364857	0.437877	-5.14149
ENSMUSG00000104273	-5.13073	1.31153	0.0488054	1.31153	-5.13073
ENSMUSG00000062372	-5.12485	0.838123	0.14517	0.838123	-5.12485
ENSMUSG00000120942	-5.08906	1.24628	0.0567177	1.24628	-5.08906
ENSMUSG00000006204	-5.06267	0.542493	0.286752	0.542493	-5.06267
ENSMUSG00000052305	-5.02766	0.420507	0.379745	0.420507	-5.02766
ENSMUSG00000115153	-4.99835	1.23159	0.0586688	1.23159	-4.99835
ENSMUSG00000114624	-4.98595	1.09904	0.079608	1.09904	-4.98595
ENSMUSG00000116616	-4.98003	1.40554	0.0393059	1.40554	-4.98003
ENSMUSG00000036545	-4.97627	0.774808	0.167954	0.774808	-4.97627
ENSMUSG00000119892	-4.96017	1.7087	0.0195569	1.7087	-4.96017
ENSMUSG00000103119	-4.95409	1.61392	0.0243266	1.61392	-4.95409
ENSMUSG00000121203	-4.94252	1.16486	0.068413	1.16486	-4.94252
ENSMUSG00000066258	-4.93714	1.93785	0.0115385	1.93785	-4.93714
ENSMUSG00000109372	-4.91374	0.403879	0.394568	0.403879	-4.91374
ENSMUSG00000072618	-4.91357	0.495928	0.319207	0.495928	-4.91357
ENSMUSG00000032087	-4.8979	0.401425	0.396803	0.401425	-4.8979
ENSMUSG00000030214	-4.88891	0.966886	0.107923	0.966886	-4.88891
ENSMUSG00000117123	-4.87453	0.987315	0.102964	0.987315	-4.87453
ENSMUSG00000098072	-4.85628	1.39814	0.0399814	1.39814	-4.85628
ENSMUSG00000030278	-4.82904	0.689161	0.204569	0.689161	-4.82904
ENSMUSG00000073460	-4.80386	0.71369	0.193335	0.71369	-4.80386
ENSMUSG00000020051	-4.79981	0.466003	0.341977	0.466003	-4.79981
ENSMUSG00000120979	-4.78181	0.953033	0.111421	0.953033	-4.78181
ENSMUSG00000098155	-4.78077	1.24009	0.0575316	1.24009	-4.78077
ENSMUSG00000085723	-4.75936	1.27865	0.0526442	1.27865	-4.75936
ENSMUSG00000120768	-4.75815	0.937382	0.11551	0.937382	-4.75815
ENSMUSG00000031162	-4.73314	0.378914	0.417914	0.378914	-4.73314
ENSMUSG00000020701	-4.72547	0.377872	0.418917	0.377872	-4.72547
ENSMUSG00000006386	-4.70857	0.431349	0.370383	0.431349	-4.70857
ENSMUSG00000062151	-4.68695	0.373278	0.423372	0.373278	-4.68695
ENSMUSG00000047854	-4.65732	0.616113	0.24204	0.616113	-4.65732
ENSMUSG00000086447	-4.64944	1.97296	0.0106424	1.97296	-4.64944
ENSMUSG00000040797	-4.64898	1.22002	0.0602532	1.22002	-4.64898
ENSMUSG00000103343	-4.63193	0.413977	0.385499	0.413977	-4.63193
ENSMUSG00000085482	-4.62972	1.30063	0.0500463	1.30063	-4.62972
ENSMUSG00000117046	-4.62447	0.648059	0.224875	0.648059	-4.62447
ENSMUSG00000066607	-4.60634	1.30112	0.0499895	1.30112	-4.60634
ENSMUSG00000120740	-4.60037	1.52213	0.0300521	1.52213	-4.60037
ENSMUSG00000097735	-4.59916	1.30028	0.0500868	1.30028	-4.59916
ENSMUSG00000042564	-4.58343	0.586605	0.259057	0.586605	-4.58343
ENSMUSG00000111442	-4.57446	0.819927	0.151382	0.819927	-4.57446
ENSMUSG00000109199	-4.54583	0.614196	0.243111	0.614196	-4.54583
ENSMUSG00000044976	-4.53313	0.389259	0.408076	0.389259	-4.53313
ENSMUSG00000107512	-4.53157	0.372834	0.423805	0.372834	-4.53157
ENSMUSG00000054404	-4.52722	0.352613	0.444004	0.352613	-4.52722
ENSMUSG00000112907	-4.52449	0.38667	0.410516	0.38667	-4.52449
ENSMUSG00000036872	-4.52344	0.402222	0.396075	0.402222	-4.52344
ENSMUSG00000097673	-4.52013	0.793378	0.160925	0.793378	-4.52013
ENSMUSG00000096971	-4.50665	0.382688	0.414298	0.382688	-4.50665
ENSMUSG00000109157	-4.50217	0.685188	0.206449	0.685188	-4.50217
ENSMUSG00002074988	-4.49809	0.899093	0.126156	0.899093	-4.49809
ENSMUSG00000064310	-4.48643	0.391223	0.406235	0.391223	-4.48643
ENSMUSG00000086851	-4.48643	0.391223	0.406235	0.391223	-4.48643
ENSMUSG00000121502	-4.47796	0.795487	0.160145	0.795487	-4.47796
ENSMUSG00000103985	-4.46778	0.996276	0.100861	0.996276	-4.46778
ENSMUSG00000009093	-4.45614	0.742788	0.180806	0.742788	-4.45614
ENSMUSG00000054746	-4.39344	0.365043	0.431476	0.365043	-4.39344
ENSMUSG00000064177	-4.39255	0.514914	0.305553	0.514914	-4.39255
ENSMUSG00000074736	-4.38695	4.14799	7.11231e-05	4.14799	-4.38695
ENSMUSG00000028950	-4.38292	1.04313	0.0905472	1.04313	-4.38292
ENSMUSG00000028111	-4.38138	0.365017	0.431502	0.365017	-4.38138
ENSMUSG00000045246	-4.38138	0.365017	0.431502	0.365017	-4.38138
ENSMUSG00000119955	-4.37422	0.625832	0.236684	0.625832	-4.37422
ENSMUSG00000031849	-4.36989	0.365412	0.43111	0.365412	-4.36989
ENSMUSG00000045657	-4.36322	0.366302	0.430227	0.366302	-4.36322
ENSMUSG00000043458	-4.36168	0.865288	0.136368	0.865288	-4.36168
ENSMUSG00000097009	-4.35879	0.546872	0.283875	0.546872	-4.35879
ENSMUSG00000117027	-4.35369	0.490907	0.322918	0.490907	-4.35369
ENSMUSG00000056771	-4.35099	1.26312	0.054561	1.26312	-4.35099
ENSMUSG00000043263	-4.35062	0.328837	0.468989	0.328837	-4.35062
ENSMUSG00000117824	-4.35062	0.328837	0.468989	0.328837	-4.35062
ENSMUSG00000015787	-4.34507	0.526987	0.297175	0.526987	-4.34507
ENSMUSG00000118790	-4.34226	0.693697	0.202443	0.693697	-4.34226
ENSMUSG00000034796	-4.33744	0.535573	0.291358	0.535573	-4.33744
ENSMUSG00000097098	-4.33303	0.358578	0.437948	0.358578	-4.33303
ENSMUSG00000107108	-4.3244	0.32565	0.472444	0.32565	-4.3244
ENSMUSG00000115406	-4.31863	0	1	0	-4.31863
ENSMUSG00000107427	-4.31798	0.950899	0.11197	0.950899	-4.31798
ENSMUSG00000108154	-4.31585	0.368814	0.427746	0.368814	-4.31585
ENSMUSG00000054580	-4.3125	0	1	0	-4.3125
ENSMUSG00000058567	-4.29902	0	1	0	-4.29902
ENSMUSG00000070576	-4.29305	0	1	0	-4.29305
ENSMUSG00000099398	-4.2866	0	1	0	-4.2866
ENSMUSG00000104965	-4.28265	0	1	0	-4.28265
ENSMUSG00000120460	-4.27686	0	1	0	-4.27686
ENSMUSG00000105358	-4.27148	0	1	0	-4.27148
ENSMUSG00000020651	-4.25401	0	1	0	-4.25401
ENSMUSG00000116655	-4.25401	0	1	0	-4.25401
ENSMUSG00000092438	-4.24688	0	1	0	-4.24688
ENSMUSG00000114622	-4.24666	0.958003	0.110153	0.958003	-4.24666
ENSMUSG00000063851	-4.2377	0	1	0	-4.2377
ENSMUSG00000102752	-4.2337	0	1	0	-4.2337
ENSMUSG00000030762	-4.23032	0	1	0	-4.23032
ENSMUSG00000085025	-4.22672	0	1	0	-4.22672
ENSMUSG00000069919	-4.22637	0.480116	0.331042	0.480116	-4.22637
ENSMUSG00000075307	-4.22056	0	1	0	-4.22056
ENSMUSG00000079339	-4.21567	0	1	0	-4.21567
ENSMUSG00000070368	-4.21404	3.0648	0.000861385	3.0648	-4.21404
ENSMUSG00000090582	-4.20363	0	1	0	-4.20363
ENSMUSG00000040372	-4.20176	0	1	0	-4.20176
ENSMUSG00000100465	-4.20118	0	1	0	-4.20118
ENSMUSG00000102673	-4.19891	0	1	0	-4.19891
ENSMUSG00000097714	-4.19525	0	1	0	-4.19525
ENSMUSG00000035783	-4.18188	0	1	0	-4.18188
ENSMUSG00000115062	-4.18188	0	1	0	-4.18188
ENSMUSG00000109600	-4.17641	0	1	0	-4.17641
ENSMUSG00000103525	-4.17196	0	1	0	-4.17196
ENSMUSG00000050520	-4.17118	43.9392	1.15026e-44	43.9392	-4.17118
ENSMUSG00000120977	-4.16525	0	1	0	-4.16525
ENSMUSG00000045733	-4.16035	0	1	0	-4.16035
ENSMUSG00000057000	-4.1549	0	1	0	-4.1549
ENSMUSG00000109561	-4.15073	0	1	0	-4.15073
ENSMUSG00000004707	-4.14935	0	1	0	-4.14935
ENSMUSG00000043857	-4.14769	0	1	0	-4.14769
ENSMUSG00000094613	-4.14335	8.86618	1.36088e-09	8.86618	-4.14335
ENSMUSG00000110636	-4.12989	0	1	0	-4.12989
ENSMUSG00000098131	-4.12988	0	1	0	-4.12988
ENSMUSG00000051242	-4.12601	0	1	0	-4.12601
ENSMUSG00000086228	-4.11986	0	1	0	-4.11986
ENSMUSG00000110724	-4.11931	1.26162	0.0547493	1.26162	-4.11931
ENSMUSG00000119132	-4.11254	0	1	0	-4.11254
ENSMUSG00000099162	-4.09841	31.8749	1.33386e-32	31.8749	-4.09841
ENSMUSG00000113875	-4.09484	0	1	0	-4.09484
ENSMUSG00000112193	-4.09422	0	1	0	-4.09422
ENSMUSG00000117704	-4.07863	0	1	0	-4.07863
ENSMUSG00000097424	-4.0778	0	1	0	-4.0778
ENSMUSG00000098758	-4.06941	0	1	0	-4.06941
ENSMUSG00000112501	-4.06792	0	1	0	-4.06792
ENSMUSG00000024598	-4.0661	0.32351	0.474778	0.32351	-4.0661
ENSMUSG00000027978	-4.04874	0	1	0	-4.04874
ENSMUSG00000078442	-4.04726	0	1	0	-4.04726
ENSMUSG00000039194	-4.04722	0	1	0	-4.04722
ENSMUSG00000120067	-4.04427	0	1	0	-4.04427
ENSMUSG00000032496	-4.04096	0	1	0	-4.04096
ENSMUSG00000086827	-4.03908	0	1	0	-4.03908
ENSMUSG00000022860	-4.02918	0	1	0	-4.02918
ENSMUSG00000033826	-4.02758	24.2327	5.85255e-25	24.2327	-4.02758
ENSMUSG00000043913	-4.02132	0.57019	0.269035	0.57019	-4.02132
ENSMUSG00000038745	-4.01956	0	1	0	-4.01956
ENSMUSG00000085369	-4.01745	0	1	0	-4.01745
ENSMUSG00000068227	-4.0132	0	1	0	-4.0132
ENSMUSG00000111417	-4.00971	0	1	0	-4.00971
ENSMUSG00000025491	-4.00729	0	1	0	-4.00729
ENSMUSG00000115329	-4.00725	0	1	0	-4.00725
ENSMUSG00000106732	-4.00078	0	1	0	-4.00078
ENSMUSG00000020887	-3.99929	0	1	0	-3.99929
ENSMUSG00000025333	-3.99428	0	1	0	-3.99428
ENSMUSG00000080993	-3.98414	0	1	0	-3.98414
ENSMUSG00000040260	-3.97803	0	1	0	-3.97803
ENSMUSG00002075180	-3.97626	0	1	0	-3.97626
ENSMUSG00000102212	-3.96608	0.721905	0.189712	0.721905	-3.96608
ENSMUSG00000117414	-3.96335	0	1	0	-3.96335
ENSMUSG00000107884	-3.95609	0	1	0	-3.95609
ENSMUSG00000097650	-3.94584	0	1	0	-3.94584
ENSMUSG00000008590	-3.93211	0	1	0	-3.93211
ENSMUSG00000085853	-3.92926	0.817384	0.152271	0.817384	-3.92926
ENSMUSG00000102539	-3.9287	0	1	0	-3.9287
ENSMUSG00000113738	-3.92031	0	1	0	-3.92031
ENSMUSG00000044303	-3.91877	0	1	0	-3.91877
ENSMUSG00000078868	-3.9182	0	1	0	-3.9182
ENSMUSG00000046782	-3.91536	0	1	0	-3.91536
ENSMUSG00000004359	-3.91104	5.79077	1.61895e-06	5.79077	-3.91104
ENSMUSG00000052133	-3.91033	0	1	0	-3.91033
ENSMUSG00000121251	-3.90844	0	1	0	-3.90844
ENSMUSG00000087159	-3.90776	0	1	0	-3.90776
ENSMUSG00000023885	-3.90755	0	1	0	-3.90755
ENSMUSG00000062209	-3.90755	0	1	0	-3.90755
ENSMUSG00000098211	-3.90411	0	1	0	-3.90411
ENSMUSG00000120120	-3.89697	0	1	0	-3.89697
ENSMUSG00000081494	-3.89654	0.85733	0.13889	0.85733	-3.89654
ENSMUSG00000007030	-3.89441	0	1	0	-3.89441
ENSMUSG00000112097	-3.89441	0	1	0	-3.89441
ENSMUSG00000040125	-3.8862	5.4197	3.8045e-06	5.4197	-3.8862
ENSMUSG00000097040	-3.88532	0	1	0	-3.88532
ENSMUSG00000073805	-3.88306	2.72594	0.00187958	2.72594	-3.88306
ENSMUSG00000105202	-3.87545	0	1	0	-3.87545
ENSMUSG00000052295	-3.87365	0.899755	0.125964	0.899755	-3.87365
ENSMUSG00000105679	-3.87303	0	1	0	-3.87303
ENSMUSG00000020793	-3.86286	0.937227	0.115551	0.937227	-3.86286
ENSMUSG00000054822	-3.86218	0.834889	0.146255	0.834889	-3.86218
ENSMUSG00000085862	-3.86159	0	1	0	-3.86159
ENSMUSG00000042195	-3.85612	0	1	0	-3.85612
ENSMUSG00000104324	-3.84723	0	1	0	-3.84723
ENSMUSG00000099686	-3.84663	0	1	0	-3.84663
ENSMUSG00000028946	-3.84495	0	1	0	-3.84495
ENSMUSG00000102302	-3.839	0	1	0	-3.839
ENSMUSG00000082129	-3.83768	0	1	0	-3.83768
ENSMUSG00000089776	-3.83181	0	1	0	-3.83181
ENSMUSG00000031085	-3.82972	0	1	0	-3.82972
ENSMUSG00000035811	-3.8281	0	1	0	-3.8281
ENSMUSG00000074281	-3.82761	0	1	0	-3.82761
ENSMUSG00002074885	-3.82691	0	1	0	-3.82691
ENSMUSG00000110529	-3.82128	0	1	0	-3.82128
ENSMUSG00000043461	-3.81984	0.540024	0.288387	0.540024	-3.81984
ENSMUSG00000106103	-3.81827	0	1	0	-3.81827
ENSMUSG00000098871	-3.81228	0	1	0	-3.81228
ENSMUSG00000073529	-3.80814	2.1522	0.0070437	2.1522	-3.80814
ENSMUSG00000046719	-3.79937	3.37798	0.000418817	3.37798	-3.79937
ENSMUSG00000054362	-3.79736	0	1	0	-3.79736
ENSMUSG00000121040	-3.79719	1.31416	0.0485105	1.31416	-3.79719
ENSMUSG00000041566	-3.78826	0.54121	0.287601	0.54121	-3.78826
ENSMUSG00000045928	-3.78257	1.27007	0.0536946	1.27007	-3.78257
ENSMUSG00000112871	-3.78212	0	1	0	-3.78212
ENSMUSG00000097612	-3.7743	0	1	0	-3.7743
ENSMUSG00000117718	-3.774	0	1	0	-3.774
ENSMUSG00000085451	-3.77388	0	1	0	-3.77388
ENSMUSG00000030897	-3.7723	0.550243	0.28168	0.550243	-3.7723
ENSMUSG00000085201	-3.76741	0	1	0	-3.76741
ENSMUSG00000051079	-3.75293	0	1	0	-3.75293
ENSMUSG00000051977	-3.75168	0.612506	0.244058	0.612506	-3.75168
ENSMUSG00000086363	-3.74848	1.57594	0.0265495	1.57594	-3.74848
ENSMUSG00000104292	-3.74673	0	1	0	-3.74673
ENSMUSG00000106061	-3.74368	0	1	0	-3.74368
ENSMUSG00000061048	-3.73948	0	1	0	-3.73948
ENSMUSG00000066072	-3.73661	0	1	0	-3.73661
ENSMUSG00000066438	-3.73521	0	1	0	-3.73521
ENSMUSG00000117429	-3.73521	0	1	0	-3.73521
ENSMUSG00000078920	-3.73166	0.550033	0.281817	0.550033	-3.73166
ENSMUSG00000103018	-3.72858	0	1	0	-3.72858
ENSMUSG00000104795	-3.72795	0	1	0	-3.72795
ENSMUSG00000040554	-3.72743	0	1	0	-3.72743
ENSMUSG00000026042	-3.72192	0.608704	0.246205	0.608704	-3.72192
ENSMUSG00000088984	-3.71769	0	1	0	-3.71769
ENSMUSG00000032036	-3.70504	8.8312	1.47502e-09	8.8312	-3.70504
ENSMUSG00000061039	-3.70241	0	1	0	-3.70241
ENSMUSG00000041617	-3.70071	1.77433	0.0168138	1.77433	-3.70071
ENSMUSG00000034063	-3.69047	0	1	0	-3.69047
ENSMUSG00000028859	-3.69031	0	1	0	-3.69031
ENSMUSG00000102879	-3.68482	0	1	0	-3.68482
ENSMUSG00000051590	-3.68181	1.90614	0.0124126	1.90614	-3.68181
ENSMUSG00000027217	-3.67717	0	1	0	-3.67717
ENSMUSG00000116491	-3.67686	0	1	0	-3.67686
ENSMUSG00000030703	-3.67328	0	1	0	-3.67328
ENSMUSG00000024620	-3.67119	0	1	0	-3.67119
ENSMUSG00000024810	-3.67119	0	1	0	-3.67119
ENSMUSG00000052496	-3.67119	0	1	0	-3.67119
ENSMUSG00000074968	-3.66601	0	1	0	-3.66601
ENSMUSG00000084201	-3.65948	0	1	0	-3.65948
ENSMUSG00000109291	-3.65048	0	1	0	-3.65048
ENSMUSG00000114536	-3.6449	0.655893	0.220855	0.655893	-3.6449
ENSMUSG00000116615	-3.64261	0	1	0	-3.64261
ENSMUSG00002076904	-3.64124	0	1	0	-3.64124
ENSMUSG00000098257	-3.64102	0.838284	0.145116	0.838284	-3.64102
ENSMUSG00000030474	-3.63593	0	1	0	-3.63593
ENSMUSG00000114617	-3.63593	0	1	0	-3.63593
ENSMUSG00000115339	-3.63369	0.687261	0.205465	0.687261	-3.63369
ENSMUSG00000051497	-3.63257	0	1	0	-3.63257
ENSMUSG00000021768	-3.62817	0	1	0	-3.62817
ENSMUSG00000034387	-3.62817	0	1	0	-3.62817
ENSMUSG00000024043	-3.62701	1.11698	0.0763876	1.11698	-3.62701
ENSMUSG00000019997	-3.62149	0	1	0	-3.62149
ENSMUSG00000108897	-3.61613	0	1	0	-3.61613
ENSMUSG00000045498	-3.61469	0	1	0	-3.61469
ENSMUSG00000109385	-3.61469	0	1	0	-3.61469
ENSMUSG00000026805	-3.60975	0.742529	0.180913	0.742529	-3.60975
ENSMUSG00000103593	-3.60498	0	1	0	-3.60498
ENSMUSG00000111839	-3.60354	0	1	0	-3.60354
ENSMUSG00000099423	-3.6032	0	1	0	-3.6032
ENSMUSG00000024379	-3.60245	0.659059	0.219251	0.659059	-3.60245
ENSMUSG00000111505	-3.60172	0	1	0	-3.60172
ENSMUSG00002076636	-3.59915	0	1	0	-3.59915
ENSMUSG00000105646	-3.59566	0	1	0	-3.59566
ENSMUSG00000097689	-3.59356	0.560301	0.275232	0.560301	-3.59356
ENSMUSG00000021700	-3.58942	6.1417	7.21603e-07	6.1417	-3.58942
ENSMUSG00000085051	-3.58865	0	1	0	-3.58865
ENSMUSG00000024135	-3.58516	25.5335	2.92748e-26	25.5335	-3.58516
ENSMUSG00000070690	-3.57923	0	1	0	-3.57923
ENSMUSG00000098534	-3.57497	7.01371	9.68934e-08	7.01371	-3.57497
ENSMUSG00000003418	-3.57467	0	1	0	-3.57467
ENSMUSG00000026770	-3.57467	0	1	0	-3.57467
ENSMUSG00000102401	-3.57467	0	1	0	-3.57467
ENSMUSG00000118028	-3.57467	0	1	0	-3.57467
ENSMUSG00000047884	-3.57016	0	1	0	-3.57016
ENSMUSG00000085755	-3.57016	0	1	0	-3.57016
ENSMUSG00000058057	-3.56984	0	1	0	-3.56984
ENSMUSG00000024125	-3.56558	0	1	0	-3.56558
ENSMUSG00000107411	-3.55761	0.243537	0.570773	0.243537	-3.55761
ENSMUSG00000047394	-3.55706	0	1	0	-3.55706
ENSMUSG00000090840	-3.55661	1.27811	0.0527101	1.27811	-3.55661
ENSMUSG00000082144	-3.55211	0	1	0	-3.55211
ENSMUSG00000052921	-3.54514	0	1	0	-3.54514
ENSMUSG00000100965	-3.54482	0	1	0	-3.54482
ENSMUSG00000104482	-3.54482	0	1	0	-3.54482
ENSMUSG00000102383	-3.54287	0	1	0	-3.54287
ENSMUSG00000059146	-3.53791	0.929776	0.11755	0.929776	-3.53791
ENSMUSG00000040061	-3.53749	0	1	0	-3.53749
ENSMUSG00000037145	-3.53606	0	1	0	-3.53606
ENSMUSG00000069041	-3.53503	0.902217	0.125252	0.902217	-3.53503
ENSMUSG00000071342	-3.53348	2.86567	0.00136249	2.86567	-3.53348
ENSMUSG00000110723	-3.531	0	1	0	-3.531
ENSMUSG00000103329	-3.53046	0	1	0	-3.53046
ENSMUSG00000039103	-3.52931	0	1	0	-3.52931
ENSMUSG00000047911	-3.52931	0	1	0	-3.52931
ENSMUSG00002076020	-3.52814	0	1	0	-3.52814
ENSMUSG00000104549	-3.52684	0	1	0	-3.52684
ENSMUSG00000110055	-3.52574	0	1	0	-3.52574
ENSMUSG00000058794	-3.52157	0	1	0	-3.52157
ENSMUSG00000078964	-3.52157	0	1	0	-3.52157
ENSMUSG00000106241	-3.52157	0	1	0	-3.52157
ENSMUSG00000120648	-3.52157	0	1	0	-3.52157
ENSMUSG00000111270	-3.51834	0	1	0	-3.51834
ENSMUSG00000020490	-3.5171	0	1	0	-3.5171
ENSMUSG00000031258	-3.5171	0	1	0	-3.5171
ENSMUSG00000060429	-3.5171	0	1	0	-3.5171
ENSMUSG00000069804	-3.5171	0	1	0	-3.5171
ENSMUSG00000107677	-3.5171	0	1	0	-3.5171
ENSMUSG00000112112	-3.5171	0	1	0	-3.5171
ENSMUSG00002076301	-3.51166	0	1	0	-3.51166
ENSMUSG00000036196	-3.50667	0.326683	0.471322	0.326683	-3.50667
ENSMUSG00000097740	-3.50472	0	1	0	-3.50472
ENSMUSG00000119838	-3.50436	0	1	0	-3.50436
ENSMUSG00000109485	-3.50011	0.781465	0.1654	0.781465	-3.50011
ENSMUSG00000020548	-3.49282	0	1	0	-3.49282
ENSMUSG00000086887	-3.49091	0	1	0	-3.49091
ENSMUSG00000104004	-3.47833	0	1	0	-3.47833
ENSMUSG00000108189	-3.47746	0	1	0	-3.47746
ENSMUSG00000104342	-3.47466	0	1	0	-3.47466
ENSMUSG00000119873	-3.4599	0.925144	0.118811	0.925144	-3.4599
ENSMUSG00000090263	-3.45788	0	1	0	-3.45788
ENSMUSG00000082396	-3.45586	0	1	0	-3.45586
ENSMUSG00000055926	-3.44894	0	1	0	-3.44894
ENSMUSG00000081270	-3.44894	0	1	0	-3.44894
ENSMUSG00000116957	-3.44354	0.728208	0.186979	0.728208	-3.44354
ENSMUSG00000027857	-3.44216	1.03938	0.0913308	1.03938	-3.44216
ENSMUSG00000087685	-3.44137	0.413718	0.385729	0.413718	-3.44137
ENSMUSG00000044583	-3.43577	0	1	0	-3.43577
ENSMUSG00000113788	-3.43577	0	1	0	-3.43577
ENSMUSG00000091794	-3.43486	0	1	0	-3.43486
ENSMUSG00000086129	-3.43442	0	1	0	-3.43442
ENSMUSG00000086719	-3.42746	0	1	0	-3.42746
ENSMUSG00000116626	-3.42556	0	1	0	-3.42556
ENSMUSG00000031380	-3.42471	0.610206	0.245354	0.610206	-3.42471
ENSMUSG00000110417	-3.42294	0	1	0	-3.42294
ENSMUSG00000103517	-3.4222	0	1	0	-3.4222
ENSMUSG00000094732	-3.41791	0	1	0	-3.41791
ENSMUSG00000097342	-3.40943	0.748836	0.178305	0.748836	-3.40943
ENSMUSG00000026828	-3.40701	0	1	0	-3.40701
ENSMUSG00000097519	-3.40701	0	1	0	-3.40701
ENSMUSG00000120079	-3.40701	0	1	0	-3.40701
ENSMUSG00000109498	-3.40691	0	1	0	-3.40691
ENSMUSG00000087616	-3.40673	0	1	0	-3.40673
ENSMUSG00000023829	-3.40646	0	1	0	-3.40646
ENSMUSG00000081941	-3.40646	0	1	0	-3.40646
ENSMUSG00000085383	-3.40646	0	1	0	-3.40646
ENSMUSG00000087312	-3.40646	0	1	0	-3.40646
ENSMUSG00000102630	-3.40646	0	1	0	-3.40646
ENSMUSG00000105328	-3.40646	0	1	0	-3.40646
ENSMUSG00000106115	-3.40646	0	1	0	-3.40646
ENSMUSG00000083672	-3.39961	1.70232	0.0198464	1.70232	-3.39961
ENSMUSG00000114087	-3.39769	0	1	0	-3.39769
ENSMUSG00000031373	-3.39558	3.46358	0.000343889	3.46358	-3.39558
ENSMUSG00000025726	-3.39158	0	1	0	-3.39158
ENSMUSG00000106386	-3.39158	0	1	0	-3.39158
ENSMUSG00000041301	-3.39078	1.91041	0.0122912	1.91041	-3.39078
ENSMUSG00000040181	-3.38134	34.4222	3.78274e-35	34.4222	-3.38134
ENSMUSG00000022097	-3.38063	0	1	0	-3.38063
ENSMUSG00000106025	-3.3721	0	1	0	-3.3721
ENSMUSG00000090659	-3.37201	0.75613	0.175335	0.75613	-3.37201
ENSMUSG00000065147	-3.37184	0	1	0	-3.37184
ENSMUSG00000106515	-3.36772	0	1	0	-3.36772
ENSMUSG00000110353	-3.36427	0	1	0	-3.36427
ENSMUSG00000085398	-3.36352	0	1	0	-3.36352
ENSMUSG00000105168	-3.35884	0	1	0	-3.35884
ENSMUSG00000113613	-3.35664	0	1	0	-3.35664
ENSMUSG00000030366	-3.35239	0	1	0	-3.35239
ENSMUSG00000108239	-3.35238	0	1	0	-3.35238
ENSMUSG00000075478	-3.35071	0.217125	0.606561	0.217125	-3.35071
ENSMUSG00000029092	-3.34759	0	1	0	-3.34759
ENSMUSG00000102762	-3.34324	0	1	0	-3.34324
ENSMUSG00000116030	-3.3428	2.91708	0.00121038	2.91708	-3.3428
ENSMUSG00000069310	-3.33471	0	1	0	-3.33471
ENSMUSG00000104696	-3.33241	0	1	0	-3.33241
ENSMUSG00000120562	-3.32568	2.0742	0.00842944	2.0742	-3.32568
ENSMUSG00000102305	-3.31933	0	1	0	-3.31933
ENSMUSG00000120085	-3.31825	0	1	0	-3.31825
ENSMUSG00000019929	-3.31121	0	1	0	-3.31121
ENSMUSG00000067615	-3.31121	0	1	0	-3.31121
ENSMUSG00000103080	-3.31121	0	1	0	-3.31121
ENSMUSG00000103138	-3.31121	0	1	0	-3.31121
ENSMUSG00000121384	-3.31055	0	1	0	-3.31055
ENSMUSG00000108791	-3.31018	1.13975	0.0724847	1.13975	-3.31018
ENSMUSG00000085232	-3.30764	0	1	0	-3.30764
ENSMUSG00000107812	-3.3055	0	1	0	-3.3055
ENSMUSG00000106379	-3.30415	0	1	0	-3.30415
ENSMUSG00000063447	-3.30197	0	1	0	-3.30197
ENSMUSG00000086749	-3.30143	0.615364	0.242458	0.615364	-3.30143
ENSMUSG00000035283	-3.29995	0	1	0	-3.29995
ENSMUSG00000078872	-3.29912	0	1	0	-3.29912
ENSMUSG00000050961	-3.29897	0.770864	0.169487	0.770864	-3.29897
ENSMUSG00000085206	-3.29633	0	1	0	-3.29633
ENSMUSG00000008129	-3.28903	0	1	0	-3.28903
ENSMUSG00000111364	-3.28903	0	1	0	-3.28903
ENSMUSG00000117239	-3.28903	0	1	0	-3.28903
ENSMUSG00000120594	-3.28903	0	1	0	-3.28903
ENSMUSG00000114768	-3.28764	0	1	0	-3.28764
ENSMUSG00000121006	-3.28757	0.372077	0.424545	0.372077	-3.28757
ENSMUSG00000039851	-3.28554	0	1	0	-3.28554
ENSMUSG00000047562	-3.28135	0	1	0	-3.28135
ENSMUSG00000087502	-3.27449	0	1	0	-3.27449
ENSMUSG00000042684	-3.27317	0	1	0	-3.27317
ENSMUSG00000099422	-3.27144	0	1	0	-3.27144
ENSMUSG00000120137	-3.26722	0	1	0	-3.26722
ENSMUSG00000045455	-3.26663	0	1	0	-3.26663
ENSMUSG00000022763	-3.2663	0.959395	0.109801	0.959395	-3.2663
ENSMUSG00000106508	-3.26116	0	1	0	-3.26116
ENSMUSG00000087217	-3.2599	0	1	0	-3.2599
ENSMUSG00000105404	-3.2599	0	1	0	-3.2599
ENSMUSG00000120045	-3.25791	0	1	0	-3.25791
ENSMUSG00000069792	-3.2575	0	1	0	-3.2575
ENSMUSG00000117072	-3.25642	0	1	0	-3.25642
ENSMUSG00000035528	-3.25409	0	1	0	-3.25409
ENSMUSG00000049539	-3.25409	0	1	0	-3.25409
ENSMUSG00000057457	-3.25409	0	1	0	-3.25409
ENSMUSG00000120189	-3.25197	0	1	0	-3.25197
ENSMUSG00000121016	-3.25105	0.761366	0.173235	0.761366	-3.25105
ENSMUSG00000055078	-3.24653	1.07312	0.0845041	1.07312	-3.24653
ENSMUSG00000107040	-3.23618	0.859262	0.138273	0.859262	-3.23618
ENSMUSG00000105541	-3.23431	0	1	0	-3.23431
ENSMUSG00000106915	-3.23359	0	1	0	-3.23359
ENSMUSG00000087024	-3.23131	1.03872	0.0914695	1.03872	-3.23131
ENSMUSG00000037974	-3.2306	0	1	0	-3.2306
ENSMUSG00000020395	-3.22967	1.28204	0.0522349	1.28204	-3.22967
ENSMUSG00000097146	-3.22778	0	1	0	-3.22778
ENSMUSG00002075338	-3.2244	0	1	0	-3.2244
ENSMUSG00000107600	-3.22431	0	1	0	-3.22431
ENSMUSG00000099937	-3.21937	0	1	0	-3.21937
ENSMUSG00000087389	-3.21361	0.638472	0.229894	0.638472	-3.21361
ENSMUSG00000042379	-3.20635	0	1	0	-3.20635
ENSMUSG00000051758	-3.20044	0	1	0	-3.20044
ENSMUSG00000116238	-3.20017	0	1	0	-3.20017
ENSMUSG00000094112	-3.19698	0.847329	0.142125	0.847329	-3.19698
ENSMUSG00000058046	-3.19616	0	1	0	-3.19616
ENSMUSG00000041445	-3.19559	0	1	0	-3.19559
ENSMUSG00000106320	-3.19111	0.649331	0.224217	0.649331	-3.19111
ENSMUSG00000089879	-3.18511	0	1	0	-3.18511
ENSMUSG00000108409	-3.18425	0	1	0	-3.18425
ENSMUSG00000120913	-3.18332	0	1	0	-3.18332
ENSMUSG00000054409	-3.17972	0	1	0	-3.17972
ENSMUSG00000018924	-3.17387	0.764343	0.172051	0.764343	-3.17387
ENSMUSG00000048215	-3.16103	0	1	0	-3.16103
ENSMUSG00000027895	-3.152	0	1	0	-3.152
ENSMUSG00000028009	-3.152	0	1	0	-3.152
ENSMUSG00000103163	-3.152	0	1	0	-3.152
ENSMUSG00000115040	-3.152	0	1	0	-3.152
ENSMUSG00000082190	-3.15047	0	1	0	-3.15047
ENSMUSG00000074737	-3.15039	0	1	0	-3.15039
ENSMUSG00000053110	-3.14588	0	1	0	-3.14588
ENSMUSG00000120403	-3.14588	0	1	0	-3.14588
ENSMUSG00000031138	-3.14435	0	1	0	-3.14435
ENSMUSG00000104945	-3.14435	0	1	0	-3.14435
ENSMUSG00000106832	-3.14435	0	1	0	-3.14435
ENSMUSG00000115750	-3.14435	0	1	0	-3.14435
ENSMUSG00000072972	-3.13954	1.09004	0.0812764	1.09004	-3.13954
ENSMUSG00000111343	-3.13179	1.04883	0.0893665	1.04883	-3.13179
ENSMUSG00000010044	-3.12921	0.477833	0.332788	0.477833	-3.12921
ENSMUSG00000041731	-3.12606	0	1	0	-3.12606
ENSMUSG00000001588	-3.1183	0	1	0	-3.1183
ENSMUSG00000118119	-3.10504	17.7244	1.88631e-18	17.7244	-3.10504
ENSMUSG00000085604	-3.10227	0.921518	0.119807	0.921518	-3.10227
ENSMUSG00000091378	-3.10207	0.420227	0.379991	0.420227	-3.10207
ENSMUSG00000103839	-3.10005	0.528917	0.295858	0.528917	-3.10005
ENSMUSG00000045053	-3.08704	1.66135	0.0218098	1.66135	-3.08704
ENSMUSG00000086761	-3.08646	0.627788	0.23562	0.627788	-3.08646
ENSMUSG00000111888	-3.07819	2.09936	0.00795492	2.09936	-3.07819
ENSMUSG00000106430	-3.07698	0	1	0	-3.07698
ENSMUSG00000089983	-3.0687	0	1	0	-3.0687
ENSMUSG00000114213	-3.0657	0.500144	0.316123	0.500144	-3.0657
ENSMUSG00002076161	-3.06108	2.06208	0.0086681	2.06208	-3.06108
ENSMUSG00000114963	-3.05962	0	1	0	-3.05962
ENSMUSG00000048498	-3.05697	0.446361	0.357799	0.446361	-3.05697
ENSMUSG00000093668	-3.0513	0	1	0	-3.0513
ENSMUSG00000025666	-3.04334	3.41246	0.000386848	3.41246	-3.04334
ENSMUSG00000029101	-3.02915	1.40154	0.03967	1.40154	-3.02915
ENSMUSG00000086845	-3.00148	0	1	0	-3.00148
ENSMUSG00000085596	-2.97336	0	1	0	-2.97336
ENSMUSG00000094446	-2.97329	0	1	0	-2.97329
ENSMUSG00000041992	-2.97037	7.00518	9.88153e-08	7.00518	-2.97037
ENSMUSG00000099207	-2.96995	0.848205	0.141839	0.848205	-2.96995
ENSMUSG00000114721	-2.96369	1.8579	0.0138707	1.8579	-2.96369
ENSMUSG00000021904	-2.95977	0	1	0	-2.95977
ENSMUSG00000103572	-2.95358	0	1	0	-2.95358
ENSMUSG00000121045	-2.94999	0	1	0	-2.94999
ENSMUSG00000114535	-2.9489	0.38351	0.413513	0.38351	-2.9489
ENSMUSG00000022836	-2.91389	0.761366	0.173235	0.761366	-2.91389
ENSMUSG00000043102	-2.91098	0	1	0	-2.91098
ENSMUSG00000111800	-2.90928	0	1	0	-2.90928
ENSMUSG00000095134	-2.90201	0.437165	0.365456	0.437165	-2.90201
ENSMUSG00000106574	-2.89815	0.777617	0.166872	0.777617	-2.89815
ENSMUSG00000118369	-2.87989	0.46472	0.342989	0.46472	-2.87989
ENSMUSG00000109031	-2.86916	0.700133	0.199465	0.700133	-2.86916
ENSMUSG00000098919	-2.86797	0	1	0	-2.86797
ENSMUSG00000116640	-2.86636	0	1	0	-2.86636
ENSMUSG00000092390	-2.86631	0.520736	0.301484	0.520736	-2.86631
ENSMUSG00000020609	-2.83662	1.73299	0.0184932	1.73299	-2.83662
ENSMUSG00000118184	-2.83185	1.25782	0.0552308	1.25782	-2.83185
ENSMUSG00000031554	-2.82908	1.30059	0.0500508	1.30059	-2.82908
ENSMUSG00000078905	-2.82429	0	1	0	-2.82429
ENSMUSG00000098068	-2.82159	0	1	0	-2.82159
ENSMUSG00000051844	-2.81951	0.601624	0.250251	0.601624	-2.81951
ENSMUSG00000090387	-2.81595	1.57265	0.0267518	1.57265	-2.81595
ENSMUSG00000027380	-2.8082	0.616772	0.241673	0.616772	-2.8082
ENSMUSG00000091275	-2.80495	0	1	0	-2.80495
ENSMUSG00000120567	-2.80252	0.577789	0.264369	0.577789	-2.80252
ENSMUSG00000084789	-2.79437	0.642684	0.227675	0.642684	-2.79437
ENSMUSG00000058022	-2.79416	0.344825	0.452038	0.344825	-2.79416
ENSMUSG00000022324	-2.7921	33.3427	4.54264e-34	33.3427	-2.7921
ENSMUSG00000115154	-2.79038	0	1	0	-2.79038
ENSMUSG00000111160	-2.79014	0	1	0	-2.79014
ENSMUSG00000081429	-2.78935	0	1	0	-2.78935
ENSMUSG00000107560	-2.78413	0	1	0	-2.78413
ENSMUSG00000108689	-2.77343	0	1	0	-2.77343
ENSMUSG00000047940	-2.76505	0.650305	0.223715	0.650305	-2.76505
ENSMUSG00000084497	-2.74929	0	1	0	-2.74929
ENSMUSG00000070025	-2.7425	0	1	0	-2.7425
ENSMUSG00000042289	-2.73813	0	1	0	-2.73813
ENSMUSG00000101621	-2.7314	0	1	0	-2.7314
ENSMUSG00000071181	-2.72796	0.683064	0.207461	0.683064	-2.72796
ENSMUSG00000079465	-2.72732	0.502967	0.314075	0.502967	-2.72732
ENSMUSG00000010825	-2.72546	0.380167	0.416709	0.380167	-2.72546
ENSMUSG00000119286	-2.72184	0	1	0	-2.72184
ENSMUSG00000047746	-2.71736	0.247424	0.565686	0.247424	-2.71736
ENSMUSG00000064010	-2.71592	2.49791	0.00317753	2.49791	-2.71592
ENSMUSG00000041378	-2.70445	0.443271	0.360354	0.443271	-2.70445
ENSMUSG00000047013	-2.69411	0.567787	0.270528	0.567787	-2.69411
ENSMUSG00000082494	-2.68363	0	1	0	-2.68363
ENSMUSG00000107352	-2.68051	0	1	0	-2.68051
ENSMUSG00000030523	-2.66512	1.39741	0.0400491	1.39741	-2.66512
ENSMUSG00000044702	-2.66271	0.806473	0.156144	0.806473	-2.66271
ENSMUSG00000023737	-2.65255	0.294791	0.507235	0.294791	-2.65255
ENSMUSG00000090891	-2.64279	0.300385	0.500744	0.300385	-2.64279
ENSMUSG00000025716	-2.63667	5.55896	2.76082e-06	5.55896	-2.63667
ENSMUSG00000104469	-2.63129	0	1	0	-2.63129
ENSMUSG00000105655	-2.61688	0	1	0	-2.61688
ENSMUSG00000108470	-2.60999	0.945717	0.113314	0.945717	-2.60999
ENSMUSG00000044447	-2.60436	1.70526	0.0197122	1.70526	-2.60436
ENSMUSG00000100303	-2.60127	0.333458	0.464026	0.333458	-2.60127
ENSMUSG00000026832	-2.59957	1.54757	0.0283422	1.54757	-2.59957
ENSMUSG00000052551	-2.58584	3.68347	0.000207267	3.68347	-2.58584
ENSMUSG00000075318	-2.58335	0	1	0	-2.58335
ENSMUSG00000096712	-2.57984	0	1	0	-2.57984
ENSMUSG00000026765	-2.56752	0	1	0	-2.56752
ENSMUSG00002075517	-2.5606	0	1	0	-2.5606
ENSMUSG00000104814	-2.55978	0	1	0	-2.55978
ENSMUSG00000028100	-2.55773	0.893707	0.12773	0.893707	-2.55773
ENSMUSG00000112474	-2.55429	0	1	0	-2.55429
ENSMUSG00000026405	-2.55175	0.203408	0.626026	0.203408	-2.55175
ENSMUSG00000032023	-2.55093	5.26359	5.45017e-06	5.26359	-2.55093
ENSMUSG00000104788	-2.54341	0	1	0	-2.54341
ENSMUSG00000029659	-2.53697	2.78173	0.001653	2.78173	-2.53697
ENSMUSG00000121069	-2.53096	0.446524	0.357665	0.446524	-2.53096
ENSMUSG00000086368	-2.52834	1.01636	0.0963036	1.01636	-2.52834
ENSMUSG00000034164	-2.5279	6.85316	1.40229e-07	6.85316	-2.5279
ENSMUSG00000101854	-2.5225	0	1	0	-2.5225
ENSMUSG00000080824	-2.51771	1.13018	0.0741009	1.13018	-2.51771
ENSMUSG00000111769	-2.5153	0.3778	0.418987	0.3778	-2.5153
ENSMUSG00000113573	-2.51116	0.906597	0.123995	0.906597	-2.51116
ENSMUSG00000112392	-2.51086	0	1	0	-2.51086
ENSMUSG00000092536	-2.51023	0	1	0	-2.51023
ENSMUSG00000104114	-2.50077	0.760956	0.173398	0.760956	-2.50077
ENSMUSG00000120524	-2.49404	0.445695	0.358348	0.445695	-2.49404
ENSMUSG00000108522	-2.48716	0	1	0	-2.48716
ENSMUSG00000083111	-2.4788	0	1	0	-2.4788
ENSMUSG00000028584	-2.47046	1.57123	0.0268392	1.57123	-2.47046
ENSMUSG00000034579	-2.46222	0	1	0	-2.46222
ENSMUSG00000113995	-2.46222	0	1	0	-2.46222
ENSMUSG00000026894	-2.46091	0	1	0	-2.46091
ENSMUSG00000029254	-2.45848	0	1	0	-2.45848
ENSMUSG00000020014	-2.45032	4.46909	3.39557e-05	4.46909	-2.45032
ENSMUSG00000118444	-2.44457	0	1	0	-2.44457
ENSMUSG00000111966	-2.44071	0.493811	0.320766	0.493811	-2.44071
ENSMUSG00000096157	-2.43507	0	1	0	-2.43507
ENSMUSG00000120607	-2.43111	2.98154	0.00104342	2.98154	-2.43111
ENSMUSG00000106885	-2.43067	0	1	0	-2.43067
ENSMUSG00000029919	-2.42464	7.20555	6.2294e-08	7.20555	-2.42464
ENSMUSG00000085007	-2.42226	2.08451	0.00823163	2.08451	-2.42226
ENSMUSG00000104514	-2.41968	0	1	0	-2.41968
ENSMUSG00000034959	-2.41955	0.769974	0.169835	0.769974	-2.41955
ENSMUSG00000078531	-2.41665	0	1	0	-2.41665
ENSMUSG00000101464	-2.41597	0	1	0	-2.41597
ENSMUSG00000087059	-2.41448	0	1	0	-2.41448
ENSMUSG00000114424	-2.40848	0	1	0	-2.40848
ENSMUSG00000114902	-2.40441	0.432575	0.369339	0.432575	-2.40441
ENSMUSG00000025189	-2.40237	5.7724	1.68887e-06	5.7724	-2.40237
ENSMUSG00000080198	-2.40169	0	1	0	-2.40169
ENSMUSG00000120186	-2.40161	0	1	0	-2.40161
ENSMUSG00000099876	-2.39844	0	1	0	-2.39844
ENSMUSG00000067121	-2.3979	0	1	0	-2.3979
ENSMUSG00000104625	-2.39635	0	1	0	-2.39635
ENSMUSG00000109812	-2.39383	1.40947	0.0389516	1.40947	-2.39383
ENSMUSG00002076960	-2.39341	0	1	0	-2.39341
ENSMUSG00000073079	-2.39138	1.95118	0.0111896	1.95118	-2.39138
ENSMUSG00000093628	-2.38204	0.397494	0.400411	0.397494	-2.38204
ENSMUSG00000115441	-2.37047	1.84927	0.0141491	1.84927	-2.37047
ENSMUSG00000117957	-2.36908	0	1	0	-2.36908
ENSMUSG00000071226	-2.36451	0.561733	0.274326	0.561733	-2.36451
ENSMUSG00000099389	-2.36402	0	1	0	-2.36402
ENSMUSG00000112139	-2.36391	3.56691	0.000271078	3.56691	-2.36391
ENSMUSG00000106224	-2.36165	1.32922	0.0468575	1.32922	-2.36165
ENSMUSG00000028635	-2.36129	1.41965	0.0380495	1.41965	-2.36129
ENSMUSG00000058159	-2.35804	3.95788	0.000110185	3.95788	-2.35804
ENSMUSG00000107990	-2.35689	0	1	0	-2.35689
ENSMUSG00000043099	-2.35507	1.45204	0.0353148	1.45204	-2.35507
ENSMUSG00000105867	-2.35301	0.338912	0.458234	0.338912	-2.35301
ENSMUSG00000030075	-2.35187	11.3794	4.17398e-12	11.3794	-2.35187
ENSMUSG00000014104	-2.34667	0.81647	0.152591	0.81647	-2.34667
ENSMUSG00000061702	-2.34659	0.615544	0.242357	0.615544	-2.34659
ENSMUSG00000086556	-2.34438	0	1	0	-2.34438
ENSMUSG00000084050	-2.34332	0.376354	0.420384	0.376354	-2.34332
ENSMUSG00000045942	-2.33038	0.744153	0.180238	0.744153	-2.33038
ENSMUSG00000030865	-2.32329	8.01007	9.77076e-09	8.01007	-2.32329
ENSMUSG00000114152	-2.32174	0	1	0	-2.32174
ENSMUSG00000024395	-2.32166	0.169616	0.676681	0.169616	-2.32166
ENSMUSG00000052430	-2.31882	1.26151	0.054763	1.26151	-2.31882
ENSMUSG00000071793	-2.31872	0	1	0	-2.31872
ENSMUSG00000054999	-2.31655	0.907375	0.123773	0.907375	-2.31655
ENSMUSG00000031220	-2.31391	0.717895	0.191472	0.717895	-2.31391
ENSMUSG00000115624	-2.30826	0.125568	0.748913	0.125568	-2.30826
ENSMUSG00000120437	-2.30354	0.641632	0.228228	0.641632	-2.30354
ENSMUSG00000072589	-2.30315	0	1	0	-2.30315
ENSMUSG00000026185	-2.30268	24.3709	4.25719e-25	24.3709	-2.30268
ENSMUSG00000102219	-2.30211	0	1	0	-2.30211
ENSMUSG00000111580	-2.29918	3.10273	0.000789352	3.10273	-2.29918
ENSMUSG00000026141	-2.29133	0.749434	0.17806	0.749434	-2.29133
ENSMUSG00000083287	-2.28893	0.513324	0.306673	0.513324	-2.28893
ENSMUSG00000107909	-2.28891	0.362718	0.433793	0.362718	-2.28891
ENSMUSG00000053957	-2.28573	0.922577	0.119515	0.922577	-2.28573
ENSMUSG00000027878	-2.28458	0.242991	0.571491	0.242991	-2.28458
ENSMUSG00000113355	-2.28071	0	1	0	-2.28071
ENSMUSG00000121224	-2.28069	0	1	0	-2.28069
ENSMUSG00000113368	-2.27566	0	1	0	-2.27566
ENSMUSG00000113570	-2.27527	0	1	0	-2.27527
ENSMUSG00000095128	-2.27401	0	1	0	-2.27401
ENSMUSG00000067276	-2.27374	0.425121	0.375733	0.425121	-2.27374
ENSMUSG00000113128	-2.27261	0.325757	0.472327	0.325757	-2.27261
ENSMUSG00000032889	-2.27092	0.54121	0.287601	0.54121	-2.27092
ENSMUSG00000053137	-2.27053	1.35479	0.0441785	1.35479	-2.27053
ENSMUSG00000028972	-2.2701	0	1	0	-2.2701
ENSMUSG00000082208	-2.26849	0	1	0	-2.26849
ENSMUSG00002074941	-2.26756	0	1	0	-2.26756
ENSMUSG00000105078	-2.26269	0.498645	0.317216	0.498645	-2.26269
ENSMUSG00000028028	-2.26176	0	1	0	-2.26176
ENSMUSG00000120884	-2.26129	0.394254	0.40341	0.394254	-2.26129
ENSMUSG00000108267	-2.26088	0.35503	0.44154	0.35503	-2.26088
ENSMUSG00000085804	-2.25831	0.3246	0.473587	0.3246	-2.25831
ENSMUSG00000120366	-2.25816	0	1	0	-2.25816
ENSMUSG00000028517	-2.25655	22.4265	3.74545e-23	22.4265	-2.25655
ENSMUSG00000042672	-2.25163	0.560634	0.275021	0.560634	-2.25163
ENSMUSG00000094447	-2.2513	45.3425	4.54426e-46	45.3425	-2.2513
ENSMUSG00000085735	-2.24923	0.670155	0.21372	0.670155	-2.24923
ENSMUSG00000035951	-2.24669	0	1	0	-2.24669
ENSMUSG00000075520	-2.24465	1.53621	0.0290932	1.53621	-2.24465
ENSMUSG00000120265	-2.24308	0	1	0	-2.24308
ENSMUSG00000081137	-2.24219	0.396846	0.401009	0.396846	-2.24219
ENSMUSG00000074071	-2.23333	0.174584	0.668985	0.174584	-2.23333
ENSMUSG00000082260	-2.23166	0	1	0	-2.23166
ENSMUSG00000028037	-2.23077	0.188342	0.648125	0.188342	-2.23077
ENSMUSG00000011632	-2.2291	0	1	0	-2.2291
ENSMUSG00000075586	-2.22648	0.624342	0.237497	0.624342	-2.22648
ENSMUSG00000092512	-2.2231	0	1	0	-2.2231
ENSMUSG00000083044	-2.22256	0	1	0	-2.22256
ENSMUSG00000030268	-2.21968	1.2401	0.057531	1.2401	-2.21968
ENSMUSG00000086624	-2.21826	0	1	0	-2.21826
ENSMUSG00000103445	-2.21788	0	1	0	-2.21788
ENSMUSG00000097832	-2.21599	0.459983	0.34675	0.459983	-2.21599
ENSMUSG00000121172	-2.21299	0	1	0	-2.21299
ENSMUSG00000087192	-2.21009	0.472979	0.336528	0.472979	-2.21009
ENSMUSG00000006235	-2.20288	0	1	0	-2.20288
ENSMUSG00000117858	-2.20231	0.35592	0.440636	0.35592	-2.20231
ENSMUSG00000108709	-2.20205	0	1	0	-2.20205
ENSMUSG00000116604	-2.20117	0	1	0	-2.20117
ENSMUSG00000104034	-2.20092	0	1	0	-2.20092
ENSMUSG00000094076	-2.19968	0	1	0	-2.19968
ENSMUSG00000084951	-2.1885	0	1	0	-2.1885
ENSMUSG00000091405	-2.18594	3.06449	0.000862003	3.06449	-2.18594
ENSMUSG00000085116	-2.18019	0	1	0	-2.18019
ENSMUSG00000111394	-2.17963	0.548364	0.282902	0.548364	-2.17963
ENSMUSG00000117896	-2.17038	0.335217	0.46215	0.335217	-2.17038
ENSMUSG00000099170	-2.16267	0	1	0	-2.16267
ENSMUSG00000109448	-2.16098	0	1	0	-2.16098
ENSMUSG00000032172	-2.15613	1.39852	0.0399467	1.39852	-2.15613
ENSMUSG00000113074	-2.15603	2.53861	0.00289327	2.53861	-2.15603
ENSMUSG00000088185	-2.15215	0	1	0	-2.15215
ENSMUSG00000110910	-2.15185	0.425953	0.375014	0.425953	-2.15185
ENSMUSG00000030068	-2.15039	0	1	0	-2.15039
ENSMUSG00000020878	-2.14807	1.44484	0.0359058	1.44484	-2.14807
ENSMUSG00000018474	-2.14278	7.03978	9.12478e-08	7.03978	-2.14278
ENSMUSG00000102891	-2.14127	0	1	0	-2.14127
ENSMUSG00000120149	-2.14087	0	1	0	-2.14087
ENSMUSG00000070574	-2.13985	0.361175	0.435337	0.361175	-2.13985
ENSMUSG00000108659	-2.13963	0.642105	0.227979	0.642105	-2.13963
ENSMUSG00002076293	-2.13946	0.638222	0.230027	0.638222	-2.13946
ENSMUSG00000079988	-2.13885	0	1	0	-2.13885
ENSMUSG00000106734	-2.13145	0.972727	0.106481	0.972727	-2.13145
ENSMUSG00000008461	-2.13068	2.2543	0.00556799	2.2543	-2.13068
ENSMUSG00000101834	-2.12208	0	1	0	-2.12208
ENSMUSG00000120435	-2.12084	0.291352	0.511268	0.291352	-2.12084
ENSMUSG00000110120	-2.12081	0.525434	0.29824	0.525434	-2.12081
ENSMUSG00000097120	-2.11961	0	1	0	-2.11961
ENSMUSG00000026692	-2.11567	4.5091	3.09669e-05	4.5091	-2.11567
ENSMUSG00000058626	-2.11443	0.241596	0.573329	0.241596	-2.11443
ENSMUSG00000086831	-2.11385	0	1	0	-2.11385
ENSMUSG00000033342	-2.11213	4.74651	1.79265e-05	4.74651	-2.11213
ENSMUSG00000071052	-2.11103	0	1	0	-2.11103
ENSMUSG00000061126	-2.10614	8.96293	1.08909e-09	8.96293	-2.10614
ENSMUSG00000082420	-2.10613	0	1	0	-2.10613
ENSMUSG00000064344	-2.10211	0.704979	0.197252	0.704979	-2.10211
ENSMUSG00000034209	-2.10161	0	1	0	-2.10161
ENSMUSG00000093424	-2.10152	0.350558	0.44611	0.350558	-2.10152
ENSMUSG00000110027	-2.10083	0.704306	0.197558	0.704306	-2.10083
ENSMUSG00000109224	-2.09936	0.487684	0.325324	0.487684	-2.09936
ENSMUSG00000031981	-2.09818	2.45712	0.00349042	2.45712	-2.09818
ENSMUSG00000075270	-2.09569	0.163705	0.685954	0.163705	-2.09569
ENSMUSG00000120835	-2.09497	1.19787	0.0634067	1.19787	-2.09497
ENSMUSG00000051726	-2.09429	4.27301	5.33317e-05	4.27301	-2.09429
ENSMUSG00000100071	-2.09124	0	1	0	-2.09124
ENSMUSG00000067224	-2.09057	0	1	0	-2.09057
ENSMUSG00000045761	-2.0901	2.92478	0.0011891	2.92478	-2.0901
ENSMUSG00000087270	-2.08897	0	1	0	-2.08897
ENSMUSG00000020990	-2.08895	11.6696	2.14017e-12	11.6696	-2.08895
ENSMUSG00000020000	-2.08634	0.336229	0.461075	0.336229	-2.08634
ENSMUSG00000120061	-2.08608	0	1	0	-2.08608
ENSMUSG00000025221	-2.08522	1.98537	0.0103425	1.98537	-2.08522
ENSMUSG00000068614	-2.08279	0.310811	0.488865	0.310811	-2.08279
ENSMUSG00000063388	-2.08243	0.353328	0.443274	0.353328	-2.08243
ENSMUSG00000004360	-2.07589	3.25381	0.000557431	3.25381	-2.07589
ENSMUSG00000062818	-2.07211	0.396122	0.401678	0.396122	-2.07211
ENSMUSG00000068855	-2.07137	0.448211	0.356278	0.448211	-2.07137
ENSMUSG00000117256	-2.0706	0.640453	0.228848	0.640453	-2.0706
ENSMUSG00000092741	-2.07033	1.55446	0.0278959	1.55446	-2.07033
ENSMUSG00000052102	-2.0688	24.3709	4.25719e-25	24.3709	-2.0688
ENSMUSG00000114835	-2.05929	0	1	0	-2.05929
ENSMUSG00000055159	-2.05869	0.382953	0.414045	0.382953	-2.05869
ENSMUSG00000118839	-2.05594	0.481418	0.330051	0.481418	-2.05594
ENSMUSG00000100783	-2.05589	0	1	0	-2.05589
ENSMUSG00000081418	-2.04859	0.495609	0.319441	0.495609	-2.04859
ENSMUSG00000048126	-2.04771	5.79907	1.58828e-06	5.79907	-2.04771
ENSMUSG00000086003	-2.04627	1.10705	0.0781544	1.10705	-2.04627
ENSMUSG00000098224	-2.04239	0	1	0	-2.04239
ENSMUSG00000019768	-2.04228	9.39139	4.06081e-10	9.39139	-2.04228
ENSMUSG00000087259	-2.04153	1.39468	0.0403012	1.39468	-2.04153
ENSMUSG00000032289	-2.03557	3.97314	0.00010638	3.97314	-2.03557
ENSMUSG00000107634	-2.03448	0.18768	0.649113	0.18768	-2.03448
ENSMUSG00000063458	-2.03407	0	1	0	-2.03407
ENSMUSG00000042759	-2.03329	0.490139	0.32349	0.490139	-2.03329
ENSMUSG00000024366	-2.03232	9.1605	6.91031e-10	9.1605	-2.03232
ENSMUSG00000050936	-2.01975	0.234237	0.583127	0.234237	-2.01975
ENSMUSG00000047842	-2.01452	4.16073	6.90674e-05	4.16073	-2.01452
ENSMUSG00000120011	-2.01052	0.379307	0.417536	0.379307	-2.01052
ENSMUSG00000113031	-2.00849	0.481589	0.329922	0.481589	-2.00849
ENSMUSG00000035200	-2.0024	0.808295	0.155491	0.808295	-2.0024
ENSMUSG00000108006	-1.99619	1.95402	0.0111169	1.95402	-1.99619
ENSMUSG00000019088	-1.99217	1.32048	0.0478098	1.32048	-1.99217
ENSMUSG00000087480	-1.99191	1.61158	0.0244579	1.61158	-1.99191
ENSMUSG00000120553	-1.99035	0.506325	0.311656	0.506325	-1.99035
ENSMUSG00000040613	-1.98756	19.4798	3.31256e-20	19.4798	-1.98756
ENSMUSG00000120197	-1.98146	0.608849	0.246122	0.608849	-1.98146
ENSMUSG00000057706	-1.98119	0.503037	0.314024	0.503037	-1.98119
ENSMUSG00000048445	-1.9802	2.09425	0.00804921	2.09425	-1.9802
ENSMUSG00000045062	-1.98009	0.138557	0.726846	0.138557	-1.98009
ENSMUSG00000109819	-1.97847	0.690317	0.204025	0.690317	-1.97847
ENSMUSG00000022304	-1.97773	1.29833	0.0503122	1.29833	-1.97773
ENSMUSG00000105584	-1.97706	0.138244	0.727372	0.138244	-1.97706
ENSMUSG00000062275	-1.97432	7.23623	5.80459e-08	7.23623	-1.97432
ENSMUSG00000098146	-1.97348	0	1	0	-1.97348
ENSMUSG00000052143	-1.96975	0.334897	0.46249	0.334897	-1.96975
ENSMUSG00000112581	-1.96942	0	1	0	-1.96942
ENSMUSG00000116478	-1.96646	0.301669	0.499265	0.301669	-1.96646
ENSMUSG00000107722	-1.96425	0.288418	0.514732	0.288418	-1.96425
ENSMUSG00000021806	-1.96088	0.181278	0.658752	0.181278	-1.96088
ENSMUSG00000024451	-1.95634	0	1	0	-1.95634
ENSMUSG00000086944	-1.95508	0	1	0	-1.95508
ENSMUSG00000120358	-1.953	0.42282	0.377729	0.42282	-1.953
ENSMUSG00000093483	-1.9457	0	1	0	-1.9457
ENSMUSG00000101859	-1.94553	0.458396	0.34802	0.458396	-1.94553
ENSMUSG00000092500	-1.94521	2.96573	0.00108212	2.96573	-1.94521
ENSMUSG00000109599	-1.94373	1.74615	0.0179412	1.74615	-1.94373
ENSMUSG00000119520	-1.94289	0	1	0	-1.94289
ENSMUSG00000024177	-1.93631	3.83024	0.000147828	3.83024	-1.93631
ENSMUSG00000103845	-1.93407	0.267482	0.540154	0.267482	-1.93407
ENSMUSG00000120671	-1.93042	0.854968	0.139647	0.854968	-1.93042
ENSMUSG00000097697	-1.926	0.286766	0.516694	0.286766	-1.926
ENSMUSG00000038496	-1.92521	0.184405	0.654026	0.184405	-1.92521
ENSMUSG00000097766	-1.92188	3.41136	0.000387831	3.41136	-1.92188
ENSMUSG00000118445	-1.92139	0.564597	0.272523	0.564597	-1.92139
ENSMUSG00000024905	-1.92085	0.143397	0.718792	0.143397	-1.92085
ENSMUSG00000074357	-1.91982	0.648507	0.224643	0.648507	-1.91982
ENSMUSG00000028179	-1.91965	0.935835	0.115922	0.935835	-1.91965
ENSMUSG00000073413	-1.91803	0	1	0	-1.91803
ENSMUSG00000083076	-1.91294	0	1	0	-1.91294
ENSMUSG00000102157	-1.91016	0	1	0	-1.91016
ENSMUSG00000120887	-1.90555	0.252692	0.558866	0.252692	-1.90555
ENSMUSG00000026979	-1.90342	19.352	4.44648e-20	19.352	-1.90342
ENSMUSG00000082253	-1.90259	0	1	0	-1.90259
ENSMUSG00000120963	-1.90256	5.05269	8.85747e-06	5.05269	-1.90256
ENSMUSG00000119948	-1.90193	0	1	0	-1.90193
ENSMUSG00000120749	-1.90048	0.540612	0.287997	0.540612	-1.90048
ENSMUSG00000038860	-1.89527	1.10796	0.0779897	1.10796	-1.89527
ENSMUSG00000107937	-1.89445	0	1	0	-1.89445
ENSMUSG00000085154	-1.89208	2.28991	0.00512965	2.28991	-1.89208
ENSMUSG00000085028	-1.88963	0	1	0	-1.88963
ENSMUSG00000029716	-1.88801	0	1	0	-1.88801
ENSMUSG00000089785	-1.88716	1.07753	0.0836504	1.07753	-1.88716
ENSMUSG00000120274	-1.88585	0.418449	0.381549	0.418449	-1.88585
ENSMUSG00000095217	-1.87787	0.540003	0.288401	0.540003	-1.87787
ENSMUSG00000112449	-1.8762	1.01936	0.0956409	1.01936	-1.8762
ENSMUSG00000092021	-1.8726	1.6208	0.023944	1.6208	-1.8726
ENSMUSG00000092397	-1.86993	0	1	0	-1.86993
ENSMUSG00000041831	-1.86906	5.53034	2.94893e-06	5.53034	-1.86906
ENSMUSG00000081491	-1.8665	0	1	0	-1.8665
ENSMUSG00000024430	-1.86463	0.359859	0.436657	0.359859	-1.86463
ENSMUSG00000086279	-1.86321	1.84223	0.0143803	1.84223	-1.86321
ENSMUSG00000007946	-1.86298	0.424747	0.376056	0.424747	-1.86298
ENSMUSG00000120584	-1.86259	2.56162	0.00274401	2.56162	-1.86259
ENSMUSG00000100215	-1.86127	0.845859	0.142607	0.845859	-1.86127
ENSMUSG00000086064	-1.86112	0.133467	0.735416	0.133467	-1.86112
ENSMUSG00000103567	-1.86016	1.09816	0.0797696	1.09816	-1.86016
ENSMUSG00000117731	-1.85793	8.36492	4.31596e-09	8.36492	-1.85793
ENSMUSG00000017830	-1.85655	0.354816	0.441757	0.354816	-1.85655
ENSMUSG00000089829	-1.85571	0.564477	0.272598	0.564477	-1.85571
ENSMUSG00000053181	-1.85465	0.385022	0.412076	0.385022	-1.85465
ENSMUSG00000085776	-1.85183	1.70138	0.0198892	1.70138	-1.85183
ENSMUSG00000112417	-1.85066	0.670457	0.213571	0.670457	-1.85066
ENSMUSG00000085430	-1.85053	0.58878	0.257762	0.58878	-1.85053
ENSMUSG00000076218	-1.85027	0.369824	0.426752	0.369824	-1.85027
ENSMUSG00000102224	-1.84552	0.699787	0.199624	0.699787	-1.84552
ENSMUSG00000073733	-1.84121	1.32592	0.0472153	1.32592	-1.84121
ENSMUSG00000085396	-1.83582	1.34413	0.0452761	1.34413	-1.83582
ENSMUSG00000074639	-1.83451	0.363343	0.433169	0.363343	-1.83451
ENSMUSG00000044052	-1.83406	0.376354	0.420384	0.376354	-1.83406
ENSMUSG00000020461	-1.83225	0.2573	0.552968	0.2573	-1.83225
ENSMUSG00000102533	-1.83142	0.527593	0.296761	0.527593	-1.83142
ENSMUSG00000060579	-1.83128	5.06775	8.55561e-06	5.06775	-1.83128
ENSMUSG00000039116	-1.82952	1.95656	0.0110521	1.95656	-1.82952
ENSMUSG00000064141	-1.81912	3.65624	0.000220679	3.65624	-1.81912
ENSMUSG00000044646	-1.81789	2.32806	0.00469828	2.32806	-1.81789
ENSMUSG00000026255	-1.81759	0.184083	0.654511	0.184083	-1.81759
ENSMUSG00000062353	-1.81746	0.934213	0.116356	0.934213	-1.81746
ENSMUSG00000112551	-1.81624	0	1	0	-1.81624
ENSMUSG00000120854	-1.81548	0.275373	0.530429	0.275373	-1.81548
ENSMUSG00000037437	-1.81243	1.24571	0.0567925	1.24571	-1.81243
ENSMUSG00000040723	-1.80863	0.360861	0.435652	0.360861	-1.80863
ENSMUSG00000106678	-1.80833	0	1	0	-1.80833
ENSMUSG00000020682	-1.80722	0	1	0	-1.80722
ENSMUSG00000020709	-1.8067	0	1	0	-1.8067
ENSMUSG00000056219	-1.80659	0	1	0	-1.80659
ENSMUSG00000050957	-1.80576	0.637479	0.23042	0.637479	-1.80576
ENSMUSG00000116116	-1.80562	0.730298	0.186081	0.730298	-1.80562
ENSMUSG00000108825	-1.80553	0	1	0	-1.80553
ENSMUSG00000085629	-1.80515	1.46	0.034674	1.46	-1.80515
ENSMUSG00000118718	-1.80474	0.191316	0.643701	0.191316	-1.80474
ENSMUSG00000116782	-1.80013	0	1	0	-1.80013
ENSMUSG00000087114	-1.79843	0	1	0	-1.79843
ENSMUSG00000107041	-1.79753	0	1	0	-1.79753
ENSMUSG00000060703	-1.79412	0.261241	0.547973	0.261241	-1.79412
ENSMUSG00000039376	-1.79107	0.173104	0.671269	0.173104	-1.79107
ENSMUSG00000015659	-1.79	0.757879	0.174631	0.757879	-1.79
ENSMUSG00000117085	-1.78962	0	1	0	-1.78962
ENSMUSG00000108823	-1.78415	0.206854	0.621077	0.206854	-1.78415
ENSMUSG00000112280	-1.78226	0.33276	0.464772	0.33276	-1.78226
ENSMUSG00002074928	-1.78213	0.283983	0.520016	0.283983	-1.78213
ENSMUSG00000106946	-1.78209	0.531936	0.293808	0.531936	-1.78209
ENSMUSG00000030882	-1.78088	0.182415	0.65703	0.182415	-1.78088
ENSMUSG00000107066	-1.78002	0.275373	0.530429	0.275373	-1.78002
ENSMUSG00000081895	-1.7785	0.655653	0.220977	0.655653	-1.7785
ENSMUSG00000097320	-1.77465	3.85118	0.000140871	3.85118	-1.77465
ENSMUSG00000113611	-1.77346	0	1	0	-1.77346
ENSMUSG00000106302	-1.76968	0	1	0	-1.76968
ENSMUSG00000043583	-1.76753	1.33538	0.0461974	1.33538	-1.76753
ENSMUSG00000111554	-1.76579	0.268417	0.538993	0.268417	-1.76579
ENSMUSG00000120855	-1.76497	0	1	0	-1.76497
ENSMUSG00000082609	-1.76222	0	1	0	-1.76222
ENSMUSG00000110767	-1.7601	0.627825	0.2356	0.627825	-1.7601
ENSMUSG00000110250	-1.75838	0.513359	0.306648	0.513359	-1.75838
ENSMUSG00000105135	-1.75462	0.369667	0.426907	0.369667	-1.75462
ENSMUSG00000085023	-1.74757	0.285196	0.518566	0.285196	-1.74757
ENSMUSG00000034855	-1.74711	0.557322	0.277126	0.557322	-1.74711
ENSMUSG00000020623	-1.74537	0.864708	0.13655	0.864708	-1.74537
ENSMUSG00000116121	-1.74291	0	1	0	-1.74291
ENSMUSG00000120142	-1.74159	0.371045	0.425555	0.371045	-1.74159
ENSMUSG00000106392	-1.73755	0.471204	0.337906	0.471204	-1.73755
ENSMUSG00000040489	-1.73514	0.438728	0.364143	0.438728	-1.73514
ENSMUSG00000027171	-1.73467	0.392705	0.404851	0.392705	-1.73467
ENSMUSG00000101156	-1.73113	0.334184	0.463251	0.334184	-1.73113
ENSMUSG00000042359	-1.72851	4.32835	4.69519e-05	4.32835	-1.72851
ENSMUSG00002076441	-1.72849	0	1	0	-1.72849
ENSMUSG00000120944	-1.72735	0.321234	0.477272	0.321234	-1.72735
ENSMUSG00000026834	-1.72533	7.14801	7.11202e-08	7.14801	-1.72533
ENSMUSG00000068674	-1.7235	0	1	0	-1.7235
ENSMUSG00000030761	-1.72329	0.316879	0.482082	0.316879	-1.72329
ENSMUSG00000087171	-1.72223	0.587468	0.258542	0.587468	-1.72223
ENSMUSG00000054745	-1.72111	0.380167	0.416709	0.380167	-1.72111
ENSMUSG00000020892	-1.72095	1.57378	0.0266823	1.57378	-1.72095
ENSMUSG00000106164	-1.72049	0.952145	0.111649	0.952145	-1.72049
ENSMUSG00000042246	-1.71814	2.27784	0.00527422	2.27784	-1.71814
ENSMUSG00000117994	-1.71737	0.117646	0.7627	0.117646	-1.71737
ENSMUSG00000118280	-1.71726	0.810674	0.154642	0.810674	-1.71726
ENSMUSG00000036853	-1.71594	2.12793	0.00744848	2.12793	-1.71594
ENSMUSG00000061755	-1.71195	9.77228	1.68936e-10	9.77228	-1.71195
ENSMUSG00000102634	-1.7077	0.395354	0.402389	0.395354	-1.7077
ENSMUSG00000083209	-1.70223	0.50123	0.315333	0.50123	-1.70223
ENSMUSG00000111253	-1.69924	0.74335	0.180572	0.74335	-1.69924
ENSMUSG00000096768	-1.69799	0.600371	0.250974	0.600371	-1.69799
ENSMUSG00000113137	-1.69697	0	1	0	-1.69697
ENSMUSG00000043088	-1.69494	9.55068	2.81399e-10	9.55068	-1.69494
ENSMUSG00000089714	-1.69312	0	1	0	-1.69312
ENSMUSG00000109647	-1.69158	0	1	0	-1.69158
ENSMUSG00000107853	-1.6891	0.335734	0.4616	0.335734	-1.6891
ENSMUSG00000082120	-1.6879	0	1	0	-1.6879
ENSMUSG00000040183	-1.68775	1.73149	0.0185573	1.73149	-1.68775
ENSMUSG00000004263	-1.68556	0.287763	0.51551	0.287763	-1.68556
ENSMUSG00000114277	-1.68479	0	1	0	-1.68479
ENSMUSG00000120380	-1.68472	0.334897	0.46249	0.334897	-1.68472
ENSMUSG00000081718	-1.68431	0.405573	0.393031	0.405573	-1.68431
ENSMUSG00000020181	-1.68177	1.35123	0.0445422	1.35123	-1.68177
ENSMUSG00000086926	-1.67926	0.388687	0.408614	0.388687	-1.67926
ENSMUSG00000034839	-1.67808	0.152556	0.703792	0.152556	-1.67808
ENSMUSG00000102287	-1.67585	0	1	0	-1.67585
ENSMUSG00000113681	-1.67578	0.275029	0.530849	0.275029	-1.67578
ENSMUSG00000034154	-1.67396	1.75795	0.0174602	1.75795	-1.67396
ENSMUSG00000054910	-1.67375	0	1	0	-1.67375
ENSMUSG00000029596	-1.67024	2.52362	0.00299492	2.52362	-1.67024
ENSMUSG00000090863	-1.66912	0	1	0	-1.66912
ENSMUSG00000107879	-1.66895	0.368466	0.428089	0.368466	-1.66895
ENSMUSG00000052273	-1.66886	0.305963	0.494352	0.305963	-1.66886
ENSMUSG00000120579	-1.66805	0.192461	0.642006	0.192461	-1.66805
ENSMUSG00000047632	-1.66771	1.35973	0.0436784	1.35973	-1.66771
ENSMUSG00000117792	-1.6675	0	1	0	-1.6675
ENSMUSG00000000673	-1.66728	0	1	0	-1.66728
ENSMUSG00000081800	-1.66608	0	1	0	-1.66608
ENSMUSG00000024552	-1.66594	2.14587	0.00714702	2.14587	-1.66594
ENSMUSG00000120758	-1.66507	0.495274	0.319687	0.495274	-1.66507
ENSMUSG00000042589	-1.66095	3.99508	0.00010114	3.99508	-1.66095
ENSMUSG00000121216	-1.66018	0.465627	0.342274	0.465627	-1.66018
ENSMUSG00000024960	-1.65993	2.62545	0.00236891	2.62545	-1.65993
ENSMUSG00000064427	-1.65987	0	1	0	-1.65987
ENSMUSG00000114569	-1.65744	0.560744	0.274951	0.560744	-1.65744
ENSMUSG00000080747	-1.65687	0	1	0	-1.65687
ENSMUSG00000086483	-1.65608	0.982747	0.104053	0.982747	-1.65608
ENSMUSG00000111941	-1.65486	0.817158	0.15235	0.817158	-1.65486
ENSMUSG00000034664	-1.65163	0.259497	0.550178	0.259497	-1.65163
ENSMUSG00000094338	-1.65074	0	1	0	-1.65074
ENSMUSG00000052557	-1.64999	2.90316	0.00124979	2.90316	-1.64999
ENSMUSG00000106252	-1.64719	0.369824	0.426752	0.369824	-1.64719
ENSMUSG00000085527	-1.64534	0.446673	0.357542	0.446673	-1.64534
ENSMUSG00000079000	-1.64212	0.689245	0.204529	0.689245	-1.64212
ENSMUSG00000083420	-1.64207	0	1	0	-1.64207
ENSMUSG00000117604	-1.64108	0	1	0	-1.64108
ENSMUSG00000121307	-1.63941	0	1	0	-1.63941
ENSMUSG00000024049	-1.63914	0.302127	0.498738	0.302127	-1.63914
ENSMUSG00000108183	-1.62981	0	1	0	-1.62981
ENSMUSG00000078897	-1.62472	0.519452	0.302377	0.519452	-1.62472
ENSMUSG00000089835	-1.62213	2.75969	0.00173903	2.75969	-1.62213
ENSMUSG00000104436	-1.61925	0	1	0	-1.61925
ENSMUSG00000118107	-1.61713	0	1	0	-1.61713
ENSMUSG00000096932	-1.61394	0.21449	0.610253	0.21449	-1.61394
ENSMUSG00000098482	-1.61299	0.402756	0.395589	0.402756	-1.61299
ENSMUSG00000037762	-1.61118	3.9113	0.000122658	3.9113	-1.61118
ENSMUSG00000090881	-1.61078	0	1	0	-1.61078
ENSMUSG00000085665	-1.60804	0.193958	0.639797	0.193958	-1.60804
ENSMUSG00000097073	-1.60694	0.356479	0.440069	0.356479	-1.60694
ENSMUSG00000109793	-1.605	0.25892	0.550909	0.25892	-1.605
ENSMUSG00000106202	-1.60403	0	1	0	-1.60403
ENSMUSG00000104846	-1.60312	0	1	0	-1.60312
ENSMUSG00000021596	-1.60123	6.20941	6.17428e-07	6.20941	-1.60123
ENSMUSG00000032988	-1.6006	0.482241	0.329427	0.482241	-1.6006
ENSMUSG00000020728	-1.60025	0.85733	0.13889	0.85733	-1.60025
ENSMUSG00000085326	-1.59904	0.496645	0.31868	0.496645	-1.59904
ENSMUSG00000048332	-1.59708	0.156588	0.697288	0.156588	-1.59708
ENSMUSG00000071517	-1.59634	0	1	0	-1.59634
ENSMUSG00000035963	-1.59572	0	1	0	-1.59572
ENSMUSG00000095105	-1.59434	0.661569	0.217987	0.661569	-1.59434
ENSMUSG00000118501	-1.59279	0.196743	0.635706	0.196743	-1.59279
ENSMUSG00000019894	-1.59044	0.340685	0.456368	0.340685	-1.59044
ENSMUSG00000082283	-1.58905	0	1	0	-1.58905
ENSMUSG00000118261	-1.58824	0	1	0	-1.58824
ENSMUSG00000047161	-1.58577	2.31126	0.0048836	2.31126	-1.58577
ENSMUSG00000108231	-1.58566	0.542412	0.286806	0.542412	-1.58566
ENSMUSG00000120138	-1.58341	0.917405	0.120947	0.917405	-1.58341
ENSMUSG00000003824	-1.58314	7.11763	7.62734e-08	7.11763	-1.58314
ENSMUSG00000109489	-1.58096	0	1	0	-1.58096
ENSMUSG00000027861	-1.58063	0.10476	0.78567	0.10476	-1.58063
ENSMUSG00000033420	-1.5783	1.31097	0.0488681	1.31097	-1.5783
ENSMUSG00000114369	-1.57546	0.312398	0.487082	0.312398	-1.57546
ENSMUSG00000097075	-1.57537	0	1	0	-1.57537
ENSMUSG00000118026	-1.57421	0.405234	0.393338	0.405234	-1.57421
ENSMUSG00000087543	-1.5704	0.320018	0.47861	0.320018	-1.5704
ENSMUSG00000064340	-1.56921	0	1	0	-1.56921
ENSMUSG00000115109	-1.56688	0.760929	0.173409	0.760929	-1.56688
ENSMUSG00000028763	-1.56675	0.0991549	0.795875	0.0991549	-1.56675
ENSMUSG00000120819	-1.56614	0	1	0	-1.56614
ENSMUSG00000031478	-1.56556	1.70772	0.0196013	1.70772	-1.56556
ENSMUSG00000090210	-1.56542	0	1	0	-1.56542
ENSMUSG00000022014	-1.56523	0.543491	0.286094	0.543491	-1.56523
ENSMUSG00002076660	-1.56383	0.203453	0.625961	0.203453	-1.56383
ENSMUSG00000040525	-1.56046	3.65548	0.000221067	3.65548	-1.56046
ENSMUSG00000107806	-1.55985	0.365246	0.431275	0.365246	-1.55985
ENSMUSG00000098274	-1.55953	0.425287	0.375589	0.425287	-1.55953
ENSMUSG00000101814	-1.55739	0.333257	0.46424	0.333257	-1.55739
ENSMUSG00000066537	-1.55524	0.530867	0.294532	0.530867	-1.55524
ENSMUSG00000114554	-1.5545	0	1	0	-1.5545
ENSMUSG00000073755	-1.55399	0.431454	0.370293	0.431454	-1.55399
ENSMUSG00000082768	-1.55318	0	1	0	-1.55318
ENSMUSG00000044033	-1.55227	0.334897	0.46249	0.334897	-1.55227
ENSMUSG00000096726	-1.55092	0	1	0	-1.55092
ENSMUSG00000074305	-1.55039	0.308361	0.491631	0.308361	-1.55039
ENSMUSG00000120586	-1.54931	0	1	0	-1.54931
ENSMUSG00000053226	-1.54775	2.58506	0.00259983	2.58506	-1.54775
ENSMUSG00000041782	-1.54714	4.53168	2.93983e-05	4.53168	-1.54714
ENSMUSG00000089680	-1.54706	0.251513	0.560386	0.251513	-1.54706
ENSMUSG00000030785	-1.54443	2.61848	0.00240722	2.61848	-1.54443
ENSMUSG00000040170	-1.54391	2.3312	0.00466449	2.3312	-1.54391
ENSMUSG00000117485	-1.54229	0.205589	0.62289	0.205589	-1.54229
ENSMUSG00000113527	-1.54133	0.512447	0.307293	0.512447	-1.54133
ENSMUSG00000022537	-1.54046	0.156588	0.697288	0.156588	-1.54046
ENSMUSG00000020635	-1.53967	4.77047	1.69641e-05	4.77047	-1.53967
ENSMUSG00000086140	-1.53956	0	1	0	-1.53956
ENSMUSG00000041695	-1.53744	0.265495	0.542631	0.265495	-1.53744
ENSMUSG00000081666	-1.53725	0	1	0	-1.53725
ENSMUSG00000108521	-1.53477	1.31432	0.0484936	1.31432	-1.53477
ENSMUSG00000102874	-1.53466	0	1	0	-1.53466
ENSMUSG00000041323	-1.53388	0.206073	0.622196	0.206073	-1.53388
ENSMUSG00000102766	-1.53202	0	1	0	-1.53202
ENSMUSG00000108604	-1.5315	0.925626	0.118679	0.925626	-1.5315
ENSMUSG00000070369	-1.53093	0.718899	0.19103	0.718899	-1.53093
ENSMUSG00000032401	-1.53021	0.273156	0.533143	0.273156	-1.53021
ENSMUSG00000110070	-1.52847	0.945717	0.113314	0.945717	-1.52847
ENSMUSG00000044017	-1.52785	1.51074	0.0308505	1.51074	-1.52785
ENSMUSG00000084314	-1.52626	0	1	0	-1.52626
ENSMUSG00000094568	-1.52536	0	1	0	-1.52536
ENSMUSG00000096722	-1.52474	0	1	0	-1.52474
ENSMUSG00000086762	-1.52277	2.04098	0.00909955	2.04098	-1.52277
ENSMUSG00000103761	-1.52263	0.127126	0.746232	0.127126	-1.52263
ENSMUSG00000084168	-1.52223	0.63805	0.230118	0.63805	-1.52223
ENSMUSG00000121118	-1.52174	0.167467	0.680037	0.167467	-1.52174
ENSMUSG00000063558	-1.52105	2.09425	0.00804921	2.09425	-1.52105
ENSMUSG00000120722	-1.52035	0	1	0	-1.52035
ENSMUSG00000022114	-1.52015	0.555125	0.278532	0.555125	-1.52015
ENSMUSG00000118264	-1.51727	0	1	0	-1.51727
ENSMUSG00000107747	-1.516	0.372681	0.423954	0.372681	-1.516
ENSMUSG00000080999	-1.51558	0	1	0	-1.51558
ENSMUSG00000099407	-1.51188	0.206415	0.621706	0.206415	-1.51188
ENSMUSG00000028427	-1.51174	0.543255	0.286249	0.543255	-1.51174
ENSMUSG00000087041	-1.51102	0.28844	0.514707	0.28844	-1.51102
ENSMUSG00000031732	-1.51078	0.634082	0.23223	0.634082	-1.51078
ENSMUSG00000120202	-1.5106	0.479223	0.331724	0.479223	-1.5106
ENSMUSG00000057058	-1.5076	4.10475	7.85689e-05	4.10475	-1.5076
ENSMUSG00000063021	-1.50595	0.232797	0.585064	0.232797	-1.50595
ENSMUSG00000042369	-1.5055	0.697712	0.20058	0.697712	-1.5055
ENSMUSG00000006717	-1.50449	10.5173	3.03906e-11	10.5173	-1.50449
ENSMUSG00000109420	-1.50375	0.457039	0.349109	0.457039	-1.50375
ENSMUSG00000031163	-1.50225	0	1	0	-1.50225
ENSMUSG00000120092	-1.50205	0.255674	0.555043	0.255674	-1.50205
ENSMUSG00000046456	-1.50114	0	1	0	-1.50114
ENSMUSG00000095766	-1.49817	0	1	0	-1.49817
ENSMUSG00000066116	-1.4977	0	1	0	-1.4977
ENSMUSG00000083823	-1.49725	0.290625	0.512124	0.290625	-1.49725
ENSMUSG00000038146	-1.49686	0.251162	0.560838	0.251162	-1.49686
ENSMUSG00000062210	-1.49653	2.81471	0.00153212	2.81471	-1.49653
ENSMUSG00000071478	-1.49202	0.287339	0.516013	0.287339	-1.49202
ENSMUSG00000037661	-1.49161	0.271859	0.534738	0.271859	-1.49161
ENSMUSG00000030255	-1.49091	2.85103	0.00140919	2.85103	-1.49091
ENSMUSG00000118099	-1.49069	0.162163	0.688394	0.162163	-1.49069
ENSMUSG00000072066	-1.49033	1.10862	0.0778712	1.10862	-1.49033
ENSMUSG00000097259	-1.48929	0.185126	0.652942	0.185126	-1.48929
ENSMUSG00000097613	-1.48892	0	1	0	-1.48892
ENSMUSG00000031765	-1.48834	2.4852	0.00327191	2.4852	-1.48834
ENSMUSG00000046585	-1.48791	0.152556	0.703792	0.152556	-1.48791
ENSMUSG00000107896	-1.4874	0.113074	0.770773	0.113074	-1.4874
ENSMUSG00000087032	-1.48505	0	1	0	-1.48505
ENSMUSG00000052387	-1.4838	2.30141	0.00499568	2.30141	-1.4838
ENSMUSG00000120847	-1.48327	3.42467	0.000376127	3.42467	-1.48327
ENSMUSG00000061132	-1.48306	0.091622	0.8098	0.091622	-1.48306
ENSMUSG00000053835	-1.48139	1.14871	0.0710045	1.14871	-1.48139
ENSMUSG00000110863	-1.48044	0.649782	0.223985	0.649782	-1.48044
ENSMUSG00000108025	-1.47986	0.321063	0.477459	0.321063	-1.47986
ENSMUSG00000087291	-1.47718	0.174064	0.669785	0.174064	-1.47718
ENSMUSG00000114742	-1.47398	0	1	0	-1.47398
ENSMUSG00000047129	-1.47388	0	1	0	-1.47388
ENSMUSG00000071350	-1.47288	0.894273	0.127564	0.894273	-1.47288
ENSMUSG00000030498	-1.46937	13.9991	1.00203e-14	13.9991	-1.46937
ENSMUSG00000075330	-1.46861	0	1	0	-1.46861
ENSMUSG00000104891	-1.46805	0	1	0	-1.46805
ENSMUSG00000083820	-1.46742	0.45928	0.347312	0.45928	-1.46742
ENSMUSG00000037824	-1.46574	10.5685	2.7007e-11	10.5685	-1.46574
ENSMUSG00000081467	-1.46482	0	1	0	-1.46482
ENSMUSG00000068120	-1.4639	0	1	0	-1.4639
ENSMUSG00000121495	-1.46382	0.328832	0.468995	0.328832	-1.46382
ENSMUSG00000120844	-1.46322	1.0338	0.0925126	1.0338	-1.46322
ENSMUSG00000054136	-1.46073	1.57594	0.0265495	1.57594	-1.46073
ENSMUSG00000081153	-1.45996	0	1	0	-1.45996
ENSMUSG00000020173	-1.45931	0.467776	0.340584	0.467776	-1.45931
ENSMUSG00000007035	-1.45583	0.516179	0.304664	0.516179	-1.45583
ENSMUSG00000113052	-1.45519	0	1	0	-1.45519
ENSMUSG00000120985	-1.45218	0.377309	0.419461	0.377309	-1.45218
ENSMUSG00000085260	-1.4511	1.08033	0.0831139	1.08033	-1.4511
ENSMUSG00000080817	-1.45028	0	1	0	-1.45028
ENSMUSG00000087252	-1.44963	0.282931	0.521277	0.282931	-1.44963
ENSMUSG00000120199	-1.44874	0	1	0	-1.44874
ENSMUSG00000023262	-1.44825	4.70114	1.99003e-05	4.70114	-1.44825
ENSMUSG00000097504	-1.44625	0.509419	0.309444	0.509419	-1.44625
ENSMUSG00000111577	-1.44605	0.269502	0.537648	0.269502	-1.44605
ENSMUSG00000006711	-1.44571	3.47784	0.000332782	3.47784	-1.44571
ENSMUSG00000053040	-1.44535	0.384082	0.412969	0.384082	-1.44535
ENSMUSG00000080021	-1.44418	0	1	0	-1.44418
ENSMUSG00000023826	-1.44395	1.91061	0.0122854	1.91061	-1.44395
ENSMUSG00000120790	-1.44373	0	1	0	-1.44373
ENSMUSG00000120826	-1.44369	0.526994	0.29717	0.526994	-1.44369
ENSMUSG00000054304	-1.44009	1.41965	0.0380495	1.41965	-1.44009
ENSMUSG00000029664	-1.43884	0.461586	0.345473	0.461586	-1.43884
ENSMUSG00000020814	-1.43831	2.23987	0.00575614	2.23987	-1.43831
ENSMUSG00000041828	-1.43795	0.196295	0.636363	0.196295	-1.43795
ENSMUSG00000054169	-1.43753	1.46674	0.0341394	1.46674	-1.43753
ENSMUSG00000060198	-1.43723	0	1	0	-1.43723
ENSMUSG00000083380	-1.43699	0.188479	0.64792	0.188479	-1.43699
ENSMUSG00000045102	-1.43511	0	1	0	-1.43511
ENSMUSG00000097184	-1.43385	7.08799	8.16607e-08	7.08799	-1.43385
ENSMUSG00000117275	-1.4332	0.24867	0.564066	0.24867	-1.4332
ENSMUSG00000121511	-1.43043	0	1	0	-1.43043
ENSMUSG00000117241	-1.42893	0	1	0	-1.42893
ENSMUSG00000117375	-1.42683	0	1	0	-1.42683
ENSMUSG00000064109	-1.42682	0.259992	0.549552	0.259992	-1.42682
ENSMUSG00000022657	-1.42401	0.891835	0.128282	0.891835	-1.42401
ENSMUSG00000104546	-1.42344	0.116086	0.765445	0.116086	-1.42344
ENSMUSG00000034732	-1.42261	0.271798	0.534813	0.271798	-1.42261
ENSMUSG00000064369	-1.41866	4.31164	4.87938e-05	4.31164	-1.41866
ENSMUSG00000120101	-1.4182	0.373684	0.422976	0.373684	-1.4182
ENSMUSG00000019989	-1.41721	0.250186	0.5621	0.250186	-1.41721
ENSMUSG00000048483	-1.41703	2.7702	0.00169744	2.7702	-1.41703
ENSMUSG00000050087	-1.41362	0.346064	0.45075	0.346064	-1.41362
ENSMUSG00000085213	-1.41295	0.900654	0.125703	0.900654	-1.41295
ENSMUSG00000082678	-1.41155	0.26432	0.544101	0.26432	-1.41155
ENSMUSG00000109314	-1.4112	0	1	0	-1.4112
ENSMUSG00000121082	-1.41013	1.95983	0.0109691	1.95983	-1.41013
ENSMUSG00000104136	-1.41012	0.12356	0.752385	0.12356	-1.41012
ENSMUSG00000105076	-1.40839	0.190472	0.644952	0.190472	-1.40839
ENSMUSG00000085838	-1.40821	5.2744	5.31624e-06	5.2744	-1.40821
ENSMUSG00000086838	-1.40664	0.952907	0.111453	0.952907	-1.40664
ENSMUSG00000025241	-1.40585	9.72106	1.90083e-10	9.72106	-1.40585
ENSMUSG00000086756	-1.40415	0.584012	0.260608	0.584012	-1.40415
ENSMUSG00000037254	-1.40308	0	1	0	-1.40308
ENSMUSG00000116114	-1.40244	2.28787	0.00515383	2.28787	-1.40244
ENSMUSG00000071640	-1.40116	0.356076	0.440478	0.356076	-1.40116
ENSMUSG00000043903	-1.39918	0.109917	0.776396	0.109917	-1.39918
ENSMUSG00000089997	-1.3989	0	1	0	-1.3989
ENSMUSG00000109108	-1.39733	1.06386	0.086326	1.06386	-1.39733
ENSMUSG00000066068	-1.39664	0.248577	0.564186	0.248577	-1.39664
ENSMUSG00000026729	-1.396	0.348158	0.448582	0.348158	-1.396
ENSMUSG00000107327	-1.39527	0	1	0	-1.39527
ENSMUSG00000120003	-1.39517	0.482795	0.329007	0.482795	-1.39517
ENSMUSG00000030031	-1.39316	0.726312	0.187797	0.726312	-1.39316
ENSMUSG00000106105	-1.39286	0	1	0	-1.39286
ENSMUSG00000065491	-1.39282	0	1	0	-1.39282
ENSMUSG00000097930	-1.39269	0.994878	0.101186	0.994878	-1.39269
ENSMUSG00000048484	-1.39232	0.421618	0.378775	0.421618	-1.39232
ENSMUSG00000087568	-1.38991	0.24208	0.572691	0.24208	-1.38991
ENSMUSG00000085391	-1.3898	0.751289	0.177301	0.751289	-1.3898
ENSMUSG00000064016	-1.38976	0.236431	0.580188	0.236431	-1.38976
ENSMUSG00000097166	-1.38681	0.766197	0.171318	0.766197	-1.38681
ENSMUSG00000120820	-1.38625	0	1	0	-1.38625
ENSMUSG00000091745	-1.38564	0	1	0	-1.38564
ENSMUSG00000117662	-1.38477	2.71212	0.00194035	2.71212	-1.38477
ENSMUSG00000006310	-1.38431	0.412662	0.386668	0.412662	-1.38431
ENSMUSG00000022211	-1.38223	3.9491	0.000112434	3.9491	-1.38223
ENSMUSG00000113263	-1.3815	0	1	0	-1.3815
ENSMUSG00000061972	-1.381	0.152852	0.703312	0.152852	-1.381
ENSMUSG00000110440	-1.38082	3.51914	0.000302593	3.51914	-1.38082
ENSMUSG00000105850	-1.38009	3.54011	0.000288331	3.54011	-1.38009
ENSMUSG00000074623	-1.37976	0.169874	0.676279	0.169874	-1.37976
ENSMUSG00000033508	-1.37946	0.0857731	0.82078	0.0857731	-1.37946
ENSMUSG00000045658	-1.37915	4.62351	2.37951e-05	4.62351	-1.37915
ENSMUSG00000043487	-1.37861	1.28829	0.0514883	1.28829	-1.37861
ENSMUSG00000022519	-1.37808	0.269263	0.537944	0.269263	-1.37808
ENSMUSG00000120996	-1.37795	1.07862	0.0834405	1.07862	-1.37795
ENSMUSG00000038768	-1.37613	0.162879	0.687261	0.162879	-1.37613
ENSMUSG00000106294	-1.37505	0.413065	0.386309	0.413065	-1.37505
ENSMUSG00000121021	-1.37364	0	1	0	-1.37364
ENSMUSG00000117614	-1.37319	0.190444	0.644995	0.190444	-1.37319
ENSMUSG00000097831	-1.37274	0	1	0	-1.37274
ENSMUSG00000105858	-1.37227	0.778608	0.166491	0.778608	-1.37227
ENSMUSG00000040724	-1.37161	2.66399	0.00216778	2.66399	-1.37161
ENSMUSG00000049625	-1.36986	0.312496	0.486972	0.312496	-1.36986
ENSMUSG00000073002	-1.36837	0.208449	0.618801	0.208449	-1.36837
ENSMUSG00000043168	-1.36577	0.154569	0.700537	0.154569	-1.36577
ENSMUSG00000082571	-1.36572	0	1	0	-1.36572
ENSMUSG00000048779	-1.36563	3.21692	0.000606845	3.21692	-1.36563
ENSMUSG00000107798	-1.36485	0.224946	0.595736	0.224946	-1.36485
ENSMUSG00000081227	-1.36458	0.287339	0.516013	0.287339	-1.36458
ENSMUSG00000063870	-1.36377	7.89893	1.26202e-08	7.89893	-1.36377
ENSMUSG00000003849	-1.36197	1.17102	0.0674503	1.17102	-1.36197
ENSMUSG00000121159	-1.36061	0.39899	0.399034	0.39899	-1.36061
ENSMUSG00000121111	-1.36005	1.06997	0.0851198	1.06997	-1.36005
ENSMUSG00000104623	-1.35953	0.236648	0.579898	0.236648	-1.35953
ENSMUSG00000087590	-1.35933	0.530108	0.295048	0.530108	-1.35933
ENSMUSG00000083832	-1.35823	0	1	0	-1.35823
ENSMUSG00000021795	-1.35772	3.36929	0.000427277	3.36929	-1.35772
ENSMUSG00000118636	-1.35748	0.161312	0.689745	0.161312	-1.35748
ENSMUSG00000102819	-1.35283	0	1	0	-1.35283
ENSMUSG00000113504	-1.35223	0.62177	0.238907	0.62177	-1.35223
ENSMUSG00000071713	-1.34983	1.36487	0.0431644	1.36487	-1.34983
ENSMUSG00000097150	-1.34923	0.542913	0.286475	0.542913	-1.34923
ENSMUSG00000039713	-1.34724	3.07267	0.000845916	3.07267	-1.34724
ENSMUSG00000066752	-1.34637	2.02658	0.00940633	2.02658	-1.34637
ENSMUSG00000032850	-1.34596	1.62723	0.0235924	1.62723	-1.34596
ENSMUSG00000091329	-1.34561	0.355603	0.440957	0.355603	-1.34561
ENSMUSG00000105960	-1.34504	0.85733	0.13889	0.85733	-1.34504
ENSMUSG00000053898	-1.34374	4.31556	4.83548e-05	4.31556	-1.34374
ENSMUSG00000084800	-1.34127	0.177418	0.664633	0.177418	-1.34127
ENSMUSG00000040528	-1.33995	0.709165	0.19536	0.709165	-1.33995
ENSMUSG00002075324	-1.33985	0	1	0	-1.33985
ENSMUSG00000042761	-1.33946	1.06053	0.0869903	1.06053	-1.33946
ENSMUSG00000068487	-1.33929	0	1	0	-1.33929
ENSMUSG00000091754	-1.33909	0	1	0	-1.33909
ENSMUSG00000084328	-1.33887	0	1	0	-1.33887
ENSMUSG00000108957	-1.33866	0.153361	0.702489	0.153361	-1.33866
ENSMUSG00000084235	-1.33847	0.504411	0.313033	0.504411	-1.33847
ENSMUSG00000096299	-1.33818	0.575427	0.265811	0.575427	-1.33818
ENSMUSG00000110588	-1.33722	3.21583	0.000608377	3.21583	-1.33722
ENSMUSG00000066108	-1.3364	0.228865	0.590385	0.228865	-1.3364
ENSMUSG00000019990	-1.33556	2.99116	0.00102057	2.99116	-1.33556
ENSMUSG00000085711	-1.33365	1.17264	0.0671985	1.17264	-1.33365
ENSMUSG00000074240	-1.33329	0.754196	0.176118	0.754196	-1.33329
ENSMUSG00000049387	-1.3325	0	1	0	-1.3325
ENSMUSG00000070305	-1.33085	0.547001	0.283792	0.547001	-1.33085
ENSMUSG00000085710	-1.32893	0	1	0	-1.32893
ENSMUSG00000058050	-1.3289	0	1	0	-1.3289
ENSMUSG00000073197	-1.3282	0.223074	0.59831	0.223074	-1.3282
ENSMUSG00000089827	-1.3274	0.464707	0.342999	0.464707	-1.3274
ENSMUSG00000097271	-1.32703	0.256447	0.554055	0.256447	-1.32703
ENSMUSG00000019971	-1.32658	3.28739	0.000515951	3.28739	-1.32658
ENSMUSG00000109810	-1.32559	0.140814	0.723079	0.140814	-1.32559
ENSMUSG00000070880	-1.32276	6.48219	3.29465e-07	6.48219	-1.32276
ENSMUSG00000108811	-1.32146	0.413977	0.385499	0.413977	-1.32146
ENSMUSG00000005131	-1.31971	4.46312	3.44251e-05	4.46312	-1.31971
ENSMUSG00000030246	-1.31949	6.58466	2.60221e-07	6.58466	-1.31949
ENSMUSG00000121064	-1.31895	0.168477	0.678458	0.168477	-1.31895
ENSMUSG00000026278	-1.31624	1.5473	0.0283593	1.5473	-1.31624
ENSMUSG00000086554	-1.31489	0	1	0	-1.31489
ENSMUSG00000087693	-1.31442	0.843016	0.143544	0.843016	-1.31442
ENSMUSG00000120808	-1.31315	0.604684	0.248494	0.604684	-1.31315
ENSMUSG00000083988	-1.3104	0.274975	0.530915	0.274975	-1.3104
ENSMUSG00000102697	-1.30994	0.662951	0.217294	0.662951	-1.30994
ENSMUSG00000081884	-1.30917	0.134272	0.734054	0.134272	-1.30917
ENSMUSG00000050503	-1.30874	2.11101	0.00774437	2.11101	-1.30874
ENSMUSG00000032985	-1.30747	0.368814	0.427746	0.368814	-1.30747
ENSMUSG00000118383	-1.30727	0.170671	0.675039	0.170671	-1.30727
ENSMUSG00000040969	-1.30706	0	1	0	-1.30706
ENSMUSG00000108484	-1.30697	0.702141	0.198545	0.702141	-1.30697
ENSMUSG00000031629	-1.30574	1.99403	0.0101383	1.99403	-1.30574
ENSMUSG00000038903	-1.30542	0.420837	0.379457	0.420837	-1.30542
ENSMUSG00000063109	-1.30408	0.23938	0.576263	0.23938	-1.30408
ENSMUSG00000059647	-1.30407	0.200078	0.630844	0.200078	-1.30407
ENSMUSG00000091985	-1.30288	3.45329	0.000352137	3.45329	-1.30288
ENSMUSG00000103827	-1.30268	0.161325	0.689724	0.161325	-1.30268
ENSMUSG00000108608	-1.30211	0.192502	0.641946	0.192502	-1.30211
ENSMUSG00000040147	-1.30175	3.89216	0.000128186	3.89216	-1.30175
ENSMUSG00000120877	-1.30104	0.305421	0.49497	0.305421	-1.30104
ENSMUSG00000009246	-1.29965	1.07896	0.0833753	1.07896	-1.29965
ENSMUSG00000037159	-1.29922	0.12672	0.74693	0.12672	-1.29922
ENSMUSG00000114693	-1.29849	1.12114	0.0756582	1.12114	-1.29849
ENSMUSG00000060771	-1.29798	2.46733	0.00340934	2.46733	-1.29798
ENSMUSG00000103398	-1.29787	0	1	0	-1.29787
ENSMUSG00000120172	-1.29588	0.241993	0.572805	0.241993	-1.29588
ENSMUSG00000061751	-1.29562	0.741667	0.181273	0.741667	-1.29562
ENSMUSG00000083364	-1.29409	0.223159	0.598192	0.223159	-1.29409
ENSMUSG00000081226	-1.29072	0	1	0	-1.29072
ENSMUSG00000032105	-1.28755	0.0765681	0.838363	0.0765681	-1.28755
ENSMUSG00000120727	-1.28655	0.227102	0.592786	0.227102	-1.28655
ENSMUSG00000100018	-1.28582	0	1	0	-1.28582
ENSMUSG00000086695	-1.28574	0.351558	0.445084	0.351558	-1.28574
ENSMUSG00000031107	-1.28502	4.08869	8.15288e-05	4.08869	-1.28502
ENSMUSG00000073607	-1.28414	0	1	0	-1.28414
ENSMUSG00000117642	-1.28335	0	1	0	-1.28335
ENSMUSG00000085975	-1.28147	0.482644	0.329121	0.482644	-1.28147
ENSMUSG00000036598	-1.2805	0.458536	0.347908	0.458536	-1.2805
ENSMUSG00000080907	-1.2798	0.31288	0.486542	0.31288	-1.2798
ENSMUSG00000097047	-1.27865	2.77641	0.00167335	2.77641	-1.27865
ENSMUSG00000087507	-1.27829	0.351677	0.444963	0.351677	-1.27829
ENSMUSG00000102808	-1.27809	0	1	0	-1.27809
ENSMUSG00000104339	-1.27779	0.246336	0.567106	0.246336	-1.27779
ENSMUSG00000070883	-1.27634	0.703923	0.197732	0.703923	-1.27634
ENSMUSG00000034681	-1.27612	5.34287	4.54081e-06	5.34287	-1.27612
ENSMUSG00000041625	-1.27543	15.8017	1.5787e-16	15.8017	-1.27543
ENSMUSG00000108353	-1.27538	2.49812	0.00317599	2.49812	-1.27538
ENSMUSG00000026158	-1.27317	2.30275	0.00498029	2.30275	-1.27317
ENSMUSG00000052783	-1.27232	1.59726	0.0252777	1.59726	-1.27232
ENSMUSG00000116903	-1.27225	0.815195	0.15304	0.815195	-1.27225
ENSMUSG00000078762	-1.2722	0.883915	0.130643	0.883915	-1.2722
ENSMUSG00000108702	-1.27215	0.73955	0.182159	0.73955	-1.27215
ENSMUSG00000070271	-1.27084	0.227672	0.592008	0.227672	-1.27084
ENSMUSG00000097310	-1.26894	0.61852	0.240702	0.61852	-1.26894
ENSMUSG00000112274	-1.26834	0.513814	0.306328	0.513814	-1.26834
ENSMUSG00000121211	-1.26822	0.107653	0.780453	0.107653	-1.26822
ENSMUSG00000093392	-1.26512	0.209911	0.616722	0.209911	-1.26512
ENSMUSG00000018168	-1.26247	2.3264	0.00471627	2.3264	-1.26247
ENSMUSG00000006218	-1.2623	0	1	0	-1.2623
ENSMUSG00000031762	-1.26092	2.68293	0.00207524	2.68293	-1.26092
ENSMUSG00000026443	-1.26089	2.00914	0.00979165	2.00914	-1.26089
ENSMUSG00000062007	-1.259	0.0735362	0.844236	0.0735362	-1.259
ENSMUSG00000026483	-1.25815	2.12011	0.00758377	2.12011	-1.25815
ENSMUSG00000040978	-1.258	3.41727	0.000382585	3.41727	-1.258
ENSMUSG00000083087	-1.25767	0	1	0	-1.25767
ENSMUSG00000089779	-1.25717	0.248083	0.564829	0.248083	-1.25717
ENSMUSG00000097308	-1.25689	0	1	0	-1.25689
ENSMUSG00000114860	-1.2567	0.820139	0.151308	0.820139	-1.2567
ENSMUSG00000018449	-1.25652	1.83817	0.0145155	1.83817	-1.25652
ENSMUSG00000109814	-1.2559	1.41868	0.0381349	1.41868	-1.2559
ENSMUSG00000037606	-1.2557	5.38807	4.09198e-06	5.38807	-1.2557
ENSMUSG00000048721	-1.25267	0.0964366	0.800872	0.0964366	-1.25267
ENSMUSG00000029153	-1.25255	4.37413	4.22547e-05	4.37413	-1.25255
ENSMUSG00000042942	-1.25254	0.138253	0.727356	0.138253	-1.25254
ENSMUSG00000055795	-1.25164	0.214106	0.610793	0.214106	-1.25164
ENSMUSG00000120486	-1.25134	0.210216	0.616288	0.210216	-1.25134
ENSMUSG00000102324	-1.25072	0.131779	0.738279	0.131779	-1.25072
ENSMUSG00000051037	-1.24981	2.22577	0.00594608	2.22577	-1.24981
ENSMUSG00000001558	-1.24931	0.103988	0.787068	0.103988	-1.24931
ENSMUSG00000028443	-1.249	5.46359	3.4388e-06	5.46359	-1.249
ENSMUSG00000110105	-1.24769	0.690708	0.203841	0.690708	-1.24769
ENSMUSG00000087571	-1.24764	0	1	0	-1.24764
ENSMUSG00000106928	-1.24638	0.102704	0.789397	0.102704	-1.24638
ENSMUSG00000015568	-1.2456	3.10062	0.000793204	3.10062	-1.2456
ENSMUSG00000030323	-1.24486	8.25677	5.53642e-09	8.25677	-1.24486
ENSMUSG00000032431	-1.24289	2.63594	0.00231237	2.63594	-1.24289
ENSMUSG00000081308	-1.23914	0	1	0	-1.23914
ENSMUSG00000087430	-1.23799	0	1	0	-1.23799
ENSMUSG00000040904	-1.23675	0.228824	0.59044	0.228824	-1.23675
ENSMUSG00000103560	-1.23634	7.79374	1.6079e-08	7.79374	-1.23634
ENSMUSG00000091144	-1.23631	0	1	0	-1.23631
ENSMUSG00000111897	-1.23568	0	1	0	-1.23568
ENSMUSG00000120080	-1.23515	0	1	0	-1.23515
ENSMUSG00000029432	-1.23483	2.32283	0.00475517	2.32283	-1.23483
ENSMUSG00000107317	-1.23384	3.39496	0.000402757	3.39496	-1.23384
ENSMUSG00000052426	-1.23276	1.4509	0.0354077	1.4509	-1.23276
ENSMUSG00000058064	-1.23246	0.952844	0.111469	0.952844	-1.23246
ENSMUSG00000093599	-1.23167	0.307011	0.493161	0.307011	-1.23167
ENSMUSG00000030717	-1.23107	3.91835	0.000120685	3.91835	-1.23107
ENSMUSG00000115730	-1.23107	0.315911	0.483158	0.315911	-1.23107
ENSMUSG00000115569	-1.23095	0.115024	0.767318	0.115024	-1.23095
ENSMUSG00000111759	-1.23041	0.203429	0.625995	0.203429	-1.23041
ENSMUSG00000103646	-1.23034	0	1	0	-1.23034
ENSMUSG00000097486	-1.22866	0.857721	0.138765	0.857721	-1.22866
ENSMUSG00000023979	-1.22807	0.210253	0.616236	0.210253	-1.22807
ENSMUSG00000006764	-1.22788	3.8923	0.000128143	3.8923	-1.22788
ENSMUSG00000121487	-1.22765	0.429953	0.371576	0.429953	-1.22765
ENSMUSG00000029923	-1.22567	2.10874	0.00778501	2.10874	-1.22567
ENSMUSG00000100228	-1.22524	0	1	0	-1.22524
ENSMUSG00000110010	-1.22512	0.210794	0.615469	0.210794	-1.22512
ENSMUSG00000041842	-1.22461	5.46365	3.43835e-06	5.46365	-1.22461
ENSMUSG00000116657	-1.22385	0.240026	0.575405	0.240026	-1.22385
ENSMUSG00000059970	-1.22365	2.53759	0.00290009	2.53759	-1.22365
ENSMUSG00000121125	-1.22353	0.275029	0.530849	0.275029	-1.22353
ENSMUSG00000021932	-1.22329	2.40902	0.00389926	2.40902	-1.22329
ENSMUSG00000086355	-1.22299	1.09674	0.0800305	1.09674	-1.22299
ENSMUSG00000121486	-1.22268	1.34137	0.0455647	1.34137	-1.22268
ENSMUSG00000094219	-1.2225	0	1	0	-1.2225
ENSMUSG00000081049	-1.22227	0.900214	0.12583	0.900214	-1.22227
ENSMUSG00000098164	-1.22216	0.183913	0.654768	0.183913	-1.22216
ENSMUSG00000110088	-1.22183	0	1	0	-1.22183
ENSMUSG00000020620	-1.22179	2.01698	0.0096165	2.01698	-1.22179
ENSMUSG00000110086	-1.22106	2.23709	0.00579303	2.23709	-1.22106
ENSMUSG00000018428	-1.22099	2.21778	0.00605655	2.21778	-1.22099
ENSMUSG00000081136	-1.21977	0	1	0	-1.21977
ENSMUSG00000029575	-1.21967	1.11617	0.0765301	1.11617	-1.21967
ENSMUSG00000112375	-1.21929	1.33127	0.0466374	1.33127	-1.21929
ENSMUSG00000045284	-1.21907	3.47348	0.000336141	3.47348	-1.21907
ENSMUSG00000033209	-1.21828	3.9086	0.000123425	3.9086	-1.21828
ENSMUSG00000087336	-1.21717	0.654664	0.221481	0.654664	-1.21717
ENSMUSG00000117768	-1.21706	0.193745	0.640111	0.193745	-1.21706
ENSMUSG00000002107	-1.21549	6.00072	9.98342e-07	6.00072	-1.21549
ENSMUSG00000026650	-1.21535	1.74099	0.0181555	1.74099	-1.21535
ENSMUSG00000021379	-1.21528	4.53015	2.9502e-05	4.53015	-1.21528
ENSMUSG00000120484	-1.21501	0.370972	0.425626	0.370972	-1.21501
ENSMUSG00000118245	-1.21465	0.161325	0.689724	0.161325	-1.21465
ENSMUSG00000105097	-1.2129	0.489504	0.323964	0.489504	-1.2129
ENSMUSG00000042655	-1.21283	5.08048	8.30837e-06	5.08048	-1.21283
ENSMUSG00000025779	-1.21278	4.15343	7.02377e-05	4.15343	-1.21278
ENSMUSG00000026627	-1.2127	5.44081	3.62398e-06	5.44081	-1.2127
ENSMUSG00000086712	-1.21156	2.63889	0.00229672	2.63889	-1.21156
ENSMUSG00000044288	-1.21154	0.44706	0.357224	0.44706	-1.21154
ENSMUSG00000099875	-1.2115	0.325248	0.472881	0.325248	-1.2115
ENSMUSG00000039628	-1.21139	2.03156	0.00929914	2.03156	-1.21139
ENSMUSG00000121141	-1.21132	1.53637	0.0290825	1.53637	-1.21132
ENSMUSG00000051113	-1.21004	1.3578	0.0438732	1.3578	-1.21004
ENSMUSG00000025429	-1.20991	5.97418	1.06126e-06	5.97418	-1.20991
ENSMUSG00000104252	-1.20918	0.147935	0.71132	0.147935	-1.20918
ENSMUSG00000116287	-1.20892	2.86322	0.0013702	2.86322	-1.20892
ENSMUSG00000097924	-1.20801	4.29246	5.09966e-05	4.29246	-1.20801
ENSMUSG00000120229	-1.20701	0.379521	0.41733	0.379521	-1.20701
ENSMUSG00000087575	-1.20684	1.46659	0.0341515	1.46659	-1.20684
ENSMUSG00000043484	-1.2064	0.623783	0.237803	0.623783	-1.2064
ENSMUSG00000120480	-1.20479	0.291489	0.511106	0.291489	-1.20479
ENSMUSG00000111133	-1.20439	2.95219	0.00111638	2.95219	-1.20439
ENSMUSG00000051000	-1.20436	1.35333	0.0443276	1.35333	-1.20436
ENSMUSG00000025856	-1.20421	4.28573	5.17924e-05	4.28573	-1.20421
ENSMUSG00000034780	-1.20316	0.977462	0.105327	0.977462	-1.20316
ENSMUSG00000025175	-1.20311	3.04865	0.000894035	3.04865	-1.20311
ENSMUSG00000101655	-1.20293	2.10282	0.00789183	2.10282	-1.20293
ENSMUSG00000108314	-1.20178	0.685533	0.206285	0.685533	-1.20178
ENSMUSG00000006005	-1.20151	8.35164	4.45002e-09	8.35164	-1.20151
ENSMUSG00000052085	-1.20046	1.69113	0.0203643	1.69113	-1.20046
ENSMUSG00000015879	-1.19973	0.0948949	0.803721	0.0948949	-1.19973
ENSMUSG00000033488	-1.1995	1.59369	0.0254866	1.59369	-1.1995
ENSMUSG00000109181	-1.19888	0	1	0	-1.19888
ENSMUSG00000041895	-1.19808	5.79077	1.61895e-06	5.79077	-1.19808
ENSMUSG00000034949	-1.19788	3.12702	0.000746421	3.12702	-1.19788
ENSMUSG00000047021	-1.1977	0.275029	0.530849	0.275029	-1.1977
ENSMUSG00000067872	-1.19723	0.0540291	0.883021	0.0540291	-1.19723
ENSMUSG00000112806	-1.19651	0.155627	0.698833	0.155627	-1.19651
ENSMUSG00000110830	-1.19604	2.1014	0.00791766	2.1014	-1.19604
ENSMUSG00000034243	-1.19514	7.53096	2.94469e-08	7.53096	-1.19514
ENSMUSG00000086846	-1.19507	0	1	0	-1.19507
ENSMUSG00000087411	-1.19505	1.911	0.0122743	1.911	-1.19505
ENSMUSG00000095869	-1.19288	0.312496	0.486972	0.312496	-1.19288
ENSMUSG00000073716	-1.19269	0	1	0	-1.19269
ENSMUSG00000030793	-1.19269	1.50907	0.0309694	1.50907	-1.19269
ENSMUSG00000025318	-1.19217	5.31392	4.85377e-06	5.31392	-1.19217
ENSMUSG00000039330	-1.19145	0.118381	0.761411	0.118381	-1.19145
ENSMUSG00000097456	-1.19119	0.151398	0.705671	0.151398	-1.19119
ENSMUSG00000087404	-1.19092	0.331514	0.466107	0.331514	-1.19092
ENSMUSG00000053675	-1.18993	0.819859	0.151405	0.819859	-1.18993
ENSMUSG00000120813	-1.18906	0	1	0	-1.18906
ENSMUSG00000047747	-1.18876	0.568338	0.270186	0.568338	-1.18876
ENSMUSG00000060467	-1.1886	0.319594	0.479078	0.319594	-1.1886
ENSMUSG00000094597	-1.18844	0	1	0	-1.18844
ENSMUSG00000055560	-1.18658	0.376354	0.420384	0.376354	-1.18658
ENSMUSG00000005397	-1.18657	0.0932552	0.806761	0.0932552	-1.18657
ENSMUSG00000066592	-1.18619	0	1	0	-1.18619
ENSMUSG00000090093	-1.18611	2.11447	0.00768303	2.11447	-1.18611
ENSMUSG00000108030	-1.1856	0.321531	0.476946	0.321531	-1.1856
ENSMUSG00000112163	-1.18496	0.177418	0.664633	0.177418	-1.18496
ENSMUSG00000087385	-1.18384	0.628201	0.235396	0.628201	-1.18384
ENSMUSG00000002769	-1.18336	1.17018	0.0675798	1.17018	-1.18336
ENSMUSG00000090254	-1.18242	0	1	0	-1.18242
ENSMUSG00000026083	-1.18125	8.07304	8.45196e-09	8.07304	-1.18125
ENSMUSG00000084829	-1.18111	0.599455	0.251504	0.599455	-1.18111
ENSMUSG00000086259	-1.18052	1.17386	0.0670098	1.17386	-1.18052
ENSMUSG00000096052	-1.18023	0.199037	0.632358	0.199037	-1.18023
ENSMUSG00000050640	-1.17992	3.38327	0.000413745	3.38327	-1.17992
ENSMUSG00000022799	-1.1795	0.286221	0.517344	0.286221	-1.1795
ENSMUSG00000119862	-1.17923	0	1	0	-1.17923
ENSMUSG00000026646	-1.17815	0.409051	0.389896	0.409051	-1.17815
ENSMUSG00000105345	-1.17761	0.210493	0.615896	0.210493	-1.17761
ENSMUSG00000021226	-1.17727	0.800014	0.158484	0.800014	-1.17727
ENSMUSG00000039217	-1.17713	1.03178	0.0929433	1.03178	-1.17713
ENSMUSG00000099825	-1.17628	0.414843	0.384731	0.414843	-1.17628
ENSMUSG00000044350	-1.17576	1.752	0.0177013	1.752	-1.17576
ENSMUSG00000092268	-1.1754	0.118381	0.761411	0.118381	-1.1754
ENSMUSG00000086290	-1.17526	0.288566	0.514558	0.288566	-1.17526
ENSMUSG00000033256	-1.17489	0.643648	0.227171	0.643648	-1.17489
ENSMUSG00000020262	-1.17414	3.51665	0.000304331	3.51665	-1.17414
ENSMUSG00000056486	-1.17387	6.53734	2.90173e-07	6.53734	-1.17387
ENSMUSG00000032892	-1.17373	1.38626	0.0410902	1.38626	-1.17373
ENSMUSG00000053965	-1.17283	2.4998	0.00316374	2.4998	-1.17283
ENSMUSG00000120019	-1.17282	1.3627	0.043381	1.3627	-1.17282
ENSMUSG00000108772	-1.17254	0.315911	0.483158	0.315911	-1.17254
ENSMUSG00000042050	-1.17149	0.762578	0.172752	0.762578	-1.17149
ENSMUSG00000015405	-1.17098	5.09716	7.99541e-06	5.09716	-1.17098
ENSMUSG00000108207	-1.17074	1.46586	0.0342093	1.46586	-1.17074
ENSMUSG00000120210	-1.17061	0.0988512	0.796432	0.0988512	-1.17061
ENSMUSG00000026544	-1.17051	3.13374	0.000734951	3.13374	-1.17051
ENSMUSG00000113606	-1.16978	0.203955	0.625237	0.203955	-1.16978
ENSMUSG00000054320	-1.16972	0.770742	0.169534	0.770742	-1.16972
ENSMUSG00000063412	-1.16955	0.652277	0.222701	0.652277	-1.16955
ENSMUSG00000086408	-1.16636	0.217008	0.606726	0.217008	-1.16636
ENSMUSG00000020673	-1.16563	0.331514	0.466107	0.331514	-1.16563
ENSMUSG00000031143	-1.16544	0.706035	0.196773	0.706035	-1.16544
ENSMUSG00000111303	-1.1651	0.725033	0.188351	0.725033	-1.1651
ENSMUSG00000085914	-1.16504	0.0879954	0.816591	0.0879954	-1.16504
ENSMUSG00000024170	-1.16492	2.10207	0.00790554	2.10207	-1.16492
ENSMUSG00000085787	-1.16443	0.287726	0.515554	0.287726	-1.16443
ENSMUSG00000116660	-1.16383	0	1	0	-1.16383
ENSMUSG00000025366	-1.16373	15.9058	1.24216e-16	15.9058	-1.16373
ENSMUSG00000118052	-1.16318	0.282931	0.521277	0.282931	-1.16318
ENSMUSG00000106583	-1.16292	1.05602	0.0878975	1.05602	-1.16292
ENSMUSG00000097383	-1.16284	2.23	0.0058885	2.23	-1.16284
ENSMUSG00000066487	-1.16154	0	1	0	-1.16154
ENSMUSG00002075207	-1.16126	0.24631	0.56714	0.24631	-1.16126
ENSMUSG00000034112	-1.16109	0	1	0	-1.16109
ENSMUSG00000064916	-1.16107	0.242254	0.572461	0.242254	-1.16107
ENSMUSG00000105950	-1.16078	0	1	0	-1.16078
ENSMUSG00000120184	-1.15996	0	1	0	-1.15996
ENSMUSG00000064317	-1.15987	0.551323	0.280981	0.551323	-1.15987
ENSMUSG00000040661	-1.15964	1.51655	0.0304407	1.51655	-1.15964
ENSMUSG00000116529	-1.15918	0	1	0	-1.15918
ENSMUSG00000093536	-1.15869	0.389259	0.408076	0.389259	-1.15869
ENSMUSG00000097402	-1.15864	0.34355	0.453367	0.34355	-1.15864
ENSMUSG00000037617	-1.15676	0.392499	0.405043	0.392499	-1.15676
ENSMUSG00000016239	-1.1562	1.2769	0.0528569	1.2769	-1.1562
ENSMUSG00000066362	-1.15558	0.512085	0.307549	0.512085	-1.15558
ENSMUSG00000014361	-1.15471	0	1	0	-1.15471
ENSMUSG00000085525	-1.15332	0	1	0	-1.15332
ENSMUSG00000044988	-1.15258	0.636436	0.230975	0.636436	-1.15258
ENSMUSG00000100763	-1.15179	0.774497	0.168075	0.774497	-1.15179
ENSMUSG00000116823	-1.15176	0.387338	0.409885	0.387338	-1.15176
ENSMUSG00000028689	-1.15125	0.450635	0.354295	0.450635	-1.15125
ENSMUSG00000093908	-1.15026	0.167423	0.680106	0.167423	-1.15026
ENSMUSG00000064337	-1.14844	6.21562	6.08666e-07	6.21562	-1.14844
ENSMUSG00000117405	-1.1476	0.169328	0.677131	0.169328	-1.1476
ENSMUSG00000034041	-1.14739	0	1	0	-1.14739
ENSMUSG00000018740	-1.14664	1.58081	0.0262537	1.58081	-1.14664
ENSMUSG00000091845	-1.14519	0.577789	0.264369	0.577789	-1.14519
ENSMUSG00000086544	-1.1439	2.81861	0.0015184	2.81861	-1.1439
ENSMUSG00000025193	-1.14356	5.38182	4.15129e-06	5.38182	-1.14356
ENSMUSG00000086382	-1.14205	1.04757	0.0896248	1.04757	-1.14205
ENSMUSG00000116164	-1.1417	0.511405	0.308031	0.511405	-1.1417
ENSMUSG00000093686	-1.14151	0	1	0	-1.14151
ENSMUSG00000066057	-1.14066	0.866909	0.13586	0.866909	-1.14066
ENSMUSG00000075031	-1.14059	0.316447	0.482562	0.316447	-1.14059
ENSMUSG00000108354	-1.14031	0.338824	0.458328	0.338824	-1.14031
ENSMUSG00000014599	-1.1398	6.13224	7.37495e-07	6.13224	-1.1398
ENSMUSG00000102478	-1.13937	0	1	0	-1.13937
ENSMUSG00000034424	-1.13869	6.27127	5.35462e-07	6.27127	-1.13869
ENSMUSG00000061099	-1.13804	0.974092	0.106147	0.974092	-1.13804
ENSMUSG00000104556	-1.13762	0.399433	0.398628	0.399433	-1.13762
ENSMUSG00000071506	-1.13659	0.175651	0.667343	0.175651	-1.13659
ENSMUSG00000027350	-1.13607	16.7067	1.96493e-17	16.7067	-1.13607
ENSMUSG00000020027	-1.13345	13.5762	2.65349e-14	13.5762	-1.13345
ENSMUSG00000019905	-1.13344	4.01432	9.67559e-05	4.01432	-1.13344
ENSMUSG00000085818	-1.13296	0.481218	0.330204	0.481218	-1.13296
ENSMUSG00000093672	-1.13296	0.133133	0.735982	0.133133	-1.13296
ENSMUSG00000043999	-1.13267	0.553944	0.27929	0.553944	-1.13267
ENSMUSG00000041062	-1.13144	0.276151	0.529479	0.276151	-1.13144
ENSMUSG00000044624	-1.13068	0.448677	0.355896	0.448677	-1.13068
ENSMUSG00000042496	-1.13061	1.84816	0.0141854	1.84816	-1.13061
ENSMUSG00000102416	-1.13042	0	1	0	-1.13042
ENSMUSG00000010660	-1.13027	0.125798	0.748517	0.125798	-1.13027
ENSMUSG00000015970	-1.1296	0.918584	0.120619	0.918584	-1.1296
ENSMUSG00000041075	-1.12939	1.00495	0.0988676	1.00495	-1.12939
ENSMUSG00000103085	-1.1288	0	1	0	-1.1288
ENSMUSG00000120233	-1.1288	0	1	0	-1.1288
ENSMUSG00000007033	-1.12835	0.173604	0.670496	0.173604	-1.12835
ENSMUSG00000000037	-1.12826	0.080112	0.831549	0.080112	-1.12826
ENSMUSG00000106190	-1.12666	0.161597	0.689292	0.161597	-1.12666
ENSMUSG00000120975	-1.12661	0.452972	0.352394	0.452972	-1.12661
ENSMUSG00000061533	-1.12637	0.320352	0.478242	0.320352	-1.12637
ENSMUSG00000119981	-1.12434	0.292301	0.510152	0.292301	-1.12434
ENSMUSG00000106230	-1.12395	0.21357	0.611547	0.21357	-1.12395
ENSMUSG00000028565	-1.12352	0.777476	0.166926	0.777476	-1.12352
ENSMUSG00000026748	-1.12279	0.630818	0.233982	0.630818	-1.12279
ENSMUSG00000027610	-1.12245	3.20104	0.000629441	3.20104	-1.12245
ENSMUSG00000039706	-1.11962	0.0996528	0.794963	0.0996528	-1.11962
ENSMUSG00000091613	-1.11934	0	1	0	-1.11934
ENSMUSG00000021453	-1.1181	6.73724	1.83132e-07	6.73724	-1.1181
ENSMUSG00000113660	-1.11801	0.199677	0.631427	0.199677	-1.11801
ENSMUSG00000109227	-1.11766	0.11239	0.771987	0.11239	-1.11766
ENSMUSG00000110556	-1.11747	0	1	0	-1.11747
ENSMUSG00000097093	-1.11724	1.22695	0.0592996	1.22695	-1.11724
ENSMUSG00000107362	-1.11577	0.18429	0.654199	0.18429	-1.11577
ENSMUSG00000086600	-1.11567	0.473132	0.336409	0.473132	-1.11567
ENSMUSG00000035778	-1.11402	0	1	0	-1.11402
ENSMUSG00000085303	-1.11376	0	1	0	-1.11376
ENSMUSG00000086029	-1.11235	1.48538	0.0327057	1.48538	-1.11235
ENSMUSG00000060438	-1.1123	0.530108	0.295048	0.530108	-1.1123
ENSMUSG00000086676	-1.11197	0	1	0	-1.11197
ENSMUSG00000074529	-1.11109	0.405303	0.393276	0.405303	-1.11109
ENSMUSG00000109739	-1.10949	0.254851	0.556095	0.254851	-1.10949
ENSMUSG00000098889	-1.10857	0.901674	0.125408	0.901674	-1.10857
ENSMUSG00000047591	-1.10849	1.25965	0.0549988	1.25965	-1.10849
ENSMUSG00000060675	-1.10753	4.01857	9.58152e-05	4.01857	-1.10753
ENSMUSG00000078695	-1.10668	3.70892	0.000195469	3.70892	-1.10668
ENSMUSG00000121054	-1.10636	0.921355	0.119852	0.921355	-1.10636
ENSMUSG00000004677	-1.10604	1.05886	0.087326	1.05886	-1.10604
ENSMUSG00000082693	-1.10478	0.234254	0.583104	0.234254	-1.10478
ENSMUSG00000029162	-1.10469	3.49224	0.00032193	3.49224	-1.10469
ENSMUSG00000046411	-1.10454	0	1	0	-1.10454
ENSMUSG00000044080	-1.10387	11.7275	1.87269e-12	11.7275	-1.10387
ENSMUSG00000082826	-1.10368	0.13306	0.736105	0.13306	-1.10368
ENSMUSG00000064140	-1.10307	0.123139	0.753115	0.123139	-1.10307
ENSMUSG00000120978	-1.10141	0.678129	0.209832	0.678129	-1.10141
ENSMUSG00000098761	-1.09963	0	1	0	-1.09963
ENSMUSG00000117231	-1.0996	1.61042	0.0245232	1.61042	-1.0996
ENSMUSG00000118256	-1.0996	0.712558	0.193839	0.712558	-1.0996
ENSMUSG00000097785	-1.09923	0.394479	0.403201	0.394479	-1.09923
ENSMUSG00000029104	-1.09883	2.56931	0.00269579	2.56931	-1.09883
ENSMUSG00000112789	-1.09782	0	1	0	-1.09782
ENSMUSG00000078161	-1.09679	1.76906	0.0170193	1.76906	-1.09679
ENSMUSG00000078716	-1.09656	1.23516	0.0581887	1.23516	-1.09656
ENSMUSG00000064339	-1.09591	8.50501	3.12604e-09	8.50501	-1.09591
ENSMUSG00000039496	-1.09499	0.161597	0.689292	0.161597	-1.09499
ENSMUSG00000116815	-1.09479	0.459217	0.347363	0.459217	-1.09479
ENSMUSG00000028591	-1.09475	0.0852247	0.821817	0.0852247	-1.09475
ENSMUSG00000031385	-1.09475	0.0671001	0.85684	0.0671001	-1.09475
ENSMUSG00000100860	-1.09451	0.50045	0.3159	0.50045	-1.09451
ENSMUSG00000081138	-1.09407	0	1	0	-1.09407
ENSMUSG00000097575	-1.09384	0.0988453	0.796443	0.0988453	-1.09384
ENSMUSG00000049336	-1.09359	6.89158	1.28356e-07	6.89158	-1.09359
ENSMUSG00000000881	-1.09293	2.87599	0.00133048	2.87599	-1.09293
ENSMUSG00000006378	-1.09292	2.95455	0.00111034	2.95455	-1.09292
ENSMUSG00000101651	-1.09279	1.00137	0.0996842	1.00137	-1.09279
ENSMUSG00000071669	-1.09096	1.19646	0.0636124	1.19646	-1.09096
ENSMUSG00000097375	-1.09037	0.118976	0.760368	0.118976	-1.09037
ENSMUSG00000118345	-1.09024	0.213154	0.612134	0.213154	-1.09024
ENSMUSG00000055296	-1.09022	5.02811	9.37334e-06	5.02811	-1.09022
ENSMUSG00000084755	-1.09002	0	1	0	-1.09002
ENSMUSG00002076054	-1.08978	0.298526	0.502891	0.298526	-1.08978
ENSMUSG00000060923	-1.08948	2.6392	0.00229508	2.6392	-1.08948
ENSMUSG00000032207	-1.08912	0	1	0	-1.08912
ENSMUSG00000120112	-1.0891	0.351473	0.445172	0.351473	-1.0891
ENSMUSG00000051638	-1.08881	0	1	0	-1.08881
ENSMUSG00000052566	-1.08831	11.2981	5.03432e-12	11.2981	-1.08831
ENSMUSG00000099843	-1.08816	1.38083	0.0416071	1.38083	-1.08816
ENSMUSG00000115190	-1.08774	0.172201	0.672665	0.172201	-1.08774
ENSMUSG00000117358	-1.08731	0.454475	0.351176	0.454475	-1.08731
ENSMUSG00000085414	-1.08727	0.363162	0.433349	0.363162	-1.08727
ENSMUSG00000063816	-1.08686	0.167664	0.679729	0.167664	-1.08686
ENSMUSG00000022759	-1.08656	0.0918092	0.809452	0.0918092	-1.08656
ENSMUSG00000046593	-1.08626	2.36354	0.00432976	2.36354	-1.08626
ENSMUSG00000113317	-1.0853	0.546927	0.28384	0.546927	-1.0853
ENSMUSG00000089371	-1.08449	0	1	0	-1.08449
ENSMUSG00000103539	-1.08436	0.095333	0.80291	0.095333	-1.08436
ENSMUSG00000060128	-1.08418	0	1	0	-1.08418
ENSMUSG00000120772	-1.08403	0	1	0	-1.08403
ENSMUSG00000069274	-1.0837	0	1	0	-1.0837
ENSMUSG00000036856	-1.08321	12.1514	7.0563e-13	12.1514	-1.08321
ENSMUSG00000090247	-1.08309	0.372681	0.423954	0.372681	-1.08309
ENSMUSG00000020389	-1.08243	0.982582	0.104092	0.982582	-1.08243
ENSMUSG00000000531	-1.08183	1.88084	0.013157	1.88084	-1.08183
ENSMUSG00000032875	-1.0816	6.56293	2.73571e-07	6.56293	-1.0816
ENSMUSG00000035834	-1.08125	2.4835	0.0032847	2.4835	-1.08125
ENSMUSG00000029869	-1.08072	2.86718	0.00135776	2.86718	-1.08072
ENSMUSG00000120043	-1.0799	1.56695	0.0271053	1.56695	-1.0799
ENSMUSG00000044164	-1.07883	3.04103	0.000909851	3.04103	-1.07883
ENSMUSG00000005267	-1.07876	1.93481	0.0116195	1.93481	-1.07876
ENSMUSG00000044145	-1.07845	0.522777	0.30007	0.522777	-1.07845
ENSMUSG00000096449	-1.07802	2.15814	0.006948	2.15814	-1.07802
ENSMUSG00000111241	-1.07792	0.106243	0.782991	0.106243	-1.07792
ENSMUSG00000119946	-1.07788	0.134516	0.733641	0.134516	-1.07788
ENSMUSG00000120633	-1.07753	0	1	0	-1.07753
ENSMUSG00000115811	-1.07752	0.293162	0.509141	0.293162	-1.07752
ENSMUSG00000101355	-1.07622	0	1	0	-1.07622
ENSMUSG00000053617	-1.07621	2.32499	0.00473158	2.32499	-1.07621
ENSMUSG00000108358	-1.07598	0.355085	0.441484	0.355085	-1.07598
ENSMUSG00000059834	-1.07558	4.23066	5.87951e-05	4.23066	-1.07558
ENSMUSG00000021194	-1.07415	4.24815	5.64747e-05	4.24815	-1.07415
ENSMUSG00000025257	-1.07316	0.333309	0.464185	0.333309	-1.07316
ENSMUSG00000052192	-1.07288	0.275029	0.530849	0.275029	-1.07288
ENSMUSG00000049576	-1.07067	0	1	0	-1.07067
ENSMUSG00000024892	-1.07021	4.22526	5.95309e-05	4.22526	-1.07021
ENSMUSG00000084869	-1.07009	0.195305	0.637815	0.195305	-1.07009
ENSMUSG00000114658	-1.06914	0.533706	0.292613	0.533706	-1.06914
ENSMUSG00000100744	-1.0691	0	1	0	-1.0691
ENSMUSG00000086315	-1.06874	0	1	0	-1.06874
ENSMUSG00000026388	-1.06866	0.891835	0.128282	0.891835	-1.06866
ENSMUSG00000096887	-1.06798	0.399307	0.398743	0.399307	-1.06798
ENSMUSG00000119993	-1.06789	0	1	0	-1.06789
ENSMUSG00000114575	-1.06753	0	1	0	-1.06753
ENSMUSG00000002808	-1.06707	2.04893	0.00893459	2.04893	-1.06707
ENSMUSG00000040860	-1.06671	2.49202	0.0032209	2.49202	-1.06671
ENSMUSG00000045378	-1.06661	0.89752	0.126613	0.89752	-1.06661
ENSMUSG00000116182	-1.06567	0.321339	0.477156	0.321339	-1.06567
ENSMUSG00000106331	-1.06528	0	1	0	-1.06528
ENSMUSG00000035759	-1.06496	1.92734	0.0118213	1.92734	-1.06496
ENSMUSG00000036298	-1.06386	4.21857	6.04543e-05	4.21857	-1.06386
ENSMUSG00000057110	-1.06367	0.562487	0.27385	0.562487	-1.06367
ENSMUSG00000024180	-1.06339	6.85091	1.40958e-07	6.85091	-1.06339
ENSMUSG00000084947	-1.06268	1.22695	0.0592996	1.22695	-1.06268
ENSMUSG00000030409	-1.06201	0.814209	0.153388	0.814209	-1.06201
ENSMUSG00000082806	-1.0614	0	1	0	-1.0614
ENSMUSG00000042678	-1.06044	0	1	0	-1.06044
ENSMUSG00000038473	-1.05991	0	1	0	-1.05991
ENSMUSG00000029480	-1.05967	1.55052	0.0281503	1.55052	-1.05967
ENSMUSG00000114593	-1.05963	0	1	0	-1.05963
ENSMUSG00000024376	-1.0593	2.42308	0.00377503	2.42308	-1.0593
ENSMUSG00000003279	-1.0587	4.06098	8.69003e-05	4.06098	-1.0587
ENSMUSG00000058488	-1.05819	4.0354	9.21723e-05	4.0354	-1.05819
ENSMUSG00000039959	-1.05814	1.25751	0.0552699	1.25751	-1.05814
ENSMUSG00000103092	-1.05699	0.152852	0.703312	0.152852	-1.05699
ENSMUSG00000036473	-1.05676	0.558345	0.276474	0.558345	-1.05676
ENSMUSG00000083767	-1.05637	0	1	0	-1.05637
ENSMUSG00000022853	-1.05609	5.9895	1.02448e-06	5.9895	-1.05609
ENSMUSG00000062470	-1.05607	1.11588	0.076581	1.11588	-1.05607
ENSMUSG00000119984	-1.0559	0.293556	0.508679	0.293556	-1.0559
ENSMUSG00000032507	-1.05575	3.7148	0.000192843	3.7148	-1.05575
ENSMUSG00000115771	-1.0543	0	1	0	-1.0543
ENSMUSG00000054708	-1.0536	3.30335	0.000497331	3.30335	-1.0536
ENSMUSG00000094344	-1.05357	0.40845	0.390436	0.40845	-1.05357
ENSMUSG00000121081	-1.05354	1.63934	0.0229435	1.63934	-1.05354
ENSMUSG00000086022	-1.0535	0.501156	0.315387	0.501156	-1.0535
ENSMUSG00000042660	-1.05342	4.66115	2.18197e-05	4.66115	-1.05342
ENSMUSG00000028957	-1.05231	0.405267	0.393308	0.405267	-1.05231
ENSMUSG00000090964	-1.05117	0.629627	0.234624	0.629627	-1.05117
ENSMUSG00000015980	-1.0511	1.20557	0.0622921	1.20557	-1.0511
ENSMUSG00000083469	-1.0505	0.394838	0.402867	0.394838	-1.0505
ENSMUSG00000114315	-1.04946	0.0973356	0.799216	0.0973356	-1.04946
ENSMUSG00000094843	-1.04936	0.269343	0.537845	0.269343	-1.04936
ENSMUSG00000022335	-1.04898	0.728729	0.186754	0.728729	-1.04898
ENSMUSG00000026312	-1.04767	4.95398	1.11178e-05	4.95398	-1.04767
ENSMUSG00000110569	-1.04762	0.245984	0.567566	0.245984	-1.04762
ENSMUSG00000021913	-1.04733	13.3213	4.77151e-14	13.3213	-1.04733
ENSMUSG00000024121	-1.04617	9.78875	1.62649e-10	9.78875	-1.04617
ENSMUSG00000044533	-1.04548	5.94629	1.13164e-06	5.94629	-1.04548
ENSMUSG00000032194	-1.04449	0.252961	0.55852	0.252961	-1.04449
ENSMUSG00000032611	-1.04434	0.158203	0.694699	0.158203	-1.04434
ENSMUSG00000052605	-1.04394	2.35113	0.00445518	2.35113	-1.04394
ENSMUSG00000027868	-1.04389	0.045616	0.900293	0.045616	-1.04389
ENSMUSG00000090394	-1.04348	0.228468	0.590924	0.228468	-1.04348
ENSMUSG00000046387	-1.04188	1.09061	0.0811692	1.09061	-1.04188
ENSMUSG00000009097	-1.04143	0.515935	0.304835	0.515935	-1.04143
ENSMUSG00000029123	-1.04008	2.63687	0.00230745	2.63687	-1.04008
ENSMUSG00000003872	-1.03968	1.02708	0.0939542	1.02708	-1.03968
ENSMUSG00000071748	-1.03955	0	1	0	-1.03955
ENSMUSG00000091237	-1.03818	0	1	0	-1.03818
ENSMUSG00000080972	-1.0381	0	1	0	-1.0381
ENSMUSG00000025909	-1.03731	3.20253	0.000627298	3.20253	-1.03731
ENSMUSG00000021947	-1.0373	2.84949	0.00141419	2.84949	-1.0373
ENSMUSG00000047965	-1.03712	0.337422	0.45981	0.337422	-1.03712
ENSMUSG00000115808	-1.03708	0	1	0	-1.03708
ENSMUSG00000068686	-1.03673	0.565359	0.272045	0.565359	-1.03673
ENSMUSG00000108854	-1.03669	0.210711	0.615587	0.210711	-1.03669
ENSMUSG00000034007	-1.03629	5.10132	7.91914e-06	5.10132	-1.03629
ENSMUSG00000110791	-1.0361	0.210346	0.616103	0.210346	-1.0361
ENSMUSG00000114217	-1.03552	0	1	0	-1.03552
ENSMUSG00002076450	-1.03459	0.79958	0.158643	0.79958	-1.03459
ENSMUSG00000044352	-1.03419	1.23983	0.0575665	1.23983	-1.03419
ENSMUSG00000096934	-1.0339	0.611689	0.244518	0.611689	-1.0339
ENSMUSG00000105894	-1.03352	0	1	0	-1.03352
ENSMUSG00000106139	-1.03347	4.58996	2.57064e-05	4.58996	-1.03347
ENSMUSG00000024208	-1.0333	14.178	6.6368e-15	14.178	-1.0333
ENSMUSG00000060063	-1.033	1.82746	0.0148778	1.82746	-1.033
ENSMUSG00000038696	-1.03247	8.94889	1.1249e-09	8.94889	-1.03247
ENSMUSG00000113488	-1.0324	0.258167	0.551866	0.258167	-1.0324
ENSMUSG00000053702	-1.03181	1.43392	0.0368196	1.43392	-1.03181
ENSMUSG00000120954	-1.03179	0.106209	0.783053	0.106209	-1.03179
ENSMUSG00000035944	-1.03118	2.30967	0.0049015	2.30967	-1.03118
ENSMUSG00000089653	-1.03109	0.307347	0.49278	0.307347	-1.03109
ENSMUSG00000108547	-1.03049	0.0762321	0.839011	0.0762321	-1.03049
ENSMUSG00000079962	-1.0303	0	1	0	-1.0303
ENSMUSG00000120425	-1.02976	0.554653	0.278835	0.554653	-1.02976
ENSMUSG00000058905	-1.02946	0.187254	0.64975	0.187254	-1.02946
ENSMUSG00000029049	-1.02941	1.35951	0.0437007	1.35951	-1.02941
ENSMUSG00000023341	-1.0285	0.0993581	0.795503	0.0993581	-1.0285
ENSMUSG00000081219	-1.0281	0.616874	0.241616	0.616874	-1.0281
ENSMUSG00000033083	-1.02672	2.05303	0.00885057	2.05303	-1.02672
ENSMUSG00000032020	-1.02662	1.5743	0.0266502	1.5743	-1.02662
ENSMUSG00000036053	-1.02477	1.4991	0.0316886	1.4991	-1.02477
ENSMUSG00000101595	-1.02433	0.11272	0.7714	0.11272	-1.02433
ENSMUSG00000106416	-1.02335	0.112959	0.770976	0.112959	-1.02335
ENSMUSG00000050974	-1.02335	0.445634	0.358398	0.445634	-1.02335
ENSMUSG00000101741	-1.0231	0	1	0	-1.0231
ENSMUSG00000041609	-1.02197	2.47955	0.00331476	2.47955	-1.02197
ENSMUSG00000107428	-1.02192	0	1	0	-1.02192
ENSMUSG00000119971	-1.02141	0	1	0	-1.02141
ENSMUSG00000037847	-1.02138	1.1812	0.0658867	1.1812	-1.02138
ENSMUSG00000108137	-1.02085	0	1	0	-1.02085
ENSMUSG00000044139	-1.02037	2.55224	0.00280387	2.55224	-1.02037
ENSMUSG00000043670	-1.01987	0.980218	0.10466	0.980218	-1.01987
ENSMUSG00000025316	-1.01844	8.4029	3.95455e-09	8.4029	-1.01844
ENSMUSG00000089803	-1.01754	0	1	0	-1.01754
ENSMUSG00000020941	-1.01721	0.717097	0.191824	0.717097	-1.01721
ENSMUSG00000030541	-1.01556	4.66115	2.18197e-05	4.66115	-1.01556
ENSMUSG00000035032	-1.01476	0.642244	0.227906	0.642244	-1.01476
ENSMUSG00000103393	-1.01459	0.0695687	0.851984	0.0695687	-1.01459
ENSMUSG00000026831	-1.01414	1.10126	0.0792031	1.10126	-1.01414
ENSMUSG00000054383	-1.01392	0.805131	0.156628	0.805131	-1.01392
ENSMUSG00000070336	-1.01371	0.880195	0.131767	0.880195	-1.01371
ENSMUSG00000052407	-1.01344	0.243027	0.571443	0.243027	-1.01344
ENSMUSG00000046683	-1.01295	0.0722033	0.846831	0.0722033	-1.01295
ENSMUSG00000092335	-1.01204	0.147738	0.711643	0.147738	-1.01204
ENSMUSG00000039221	-1.0113	6.10313	7.88632e-07	6.10313	-1.0113
ENSMUSG00000073758	-1.01052	1.74612	0.0179422	1.74612	-1.01052
ENSMUSG00000086502	-1.0098	1.48003	0.033111	1.48003	-1.0098
ENSMUSG00000000416	-1.00963	1.41302	0.0386348	1.41302	-1.00963
ENSMUSG00000085189	-1.00813	0.259452	0.550235	0.259452	-1.00813
ENSMUSG00000078607	-1.00812	2.75376	0.00176296	2.75376	-1.00812
ENSMUSG00000120966	-1.00797	0	1	0	-1.00797
ENSMUSG00000094777	-1.00667	0	1	0	-1.00667
ENSMUSG00000018861	-1.00662	3.97036	0.000107064	3.97036	-1.00662
ENSMUSG00000086119	-1.00656	0.220172	0.602321	0.220172	-1.00656
ENSMUSG00000016933	-1.00602	3.53009	0.000295058	3.53009	-1.00602
ENSMUSG00000105445	-1.00429	0.0736656	0.843984	0.0736656	-1.00429
ENSMUSG00000106568	-1.00413	0.248473	0.564322	0.248473	-1.00413
ENSMUSG00000040717	-1.00381	0.0564748	0.878062	0.0564748	-1.00381
ENSMUSG00000105471	-1.00348	0.536998	0.290403	0.536998	-1.00348
ENSMUSG00000085227	-1.00297	2.68161	0.00208158	2.68161	-1.00297
ENSMUSG00000097515	-1.00272	0.856333	0.139209	0.856333	-1.00272
ENSMUSG00000047022	-1.00256	2.86628	0.00136055	2.86628	-1.00256
ENSMUSG00000065492	-1.00248	0	1	0	-1.00248
ENSMUSG00000120100	-1.00173	0.556672	0.277541	0.556672	-1.00173
ENSMUSG00000086942	-1.00167	0.0716417	0.847927	0.0716417	-1.00167
ENSMUSG00000117869	-1.0009	1.17211	0.0672799	1.17211	-1.0009
ENSMUSG00000111446	-1.00061	0.203906	0.625307	0.203906	-1.00061
ENSMUSG00000095526	-1.00055	0	1	0	-1.00055
ENSMUSG00000037108	-0.999876	0.238091	0.577975	0.238091	-0.999876
ENSMUSG00000085085	-0.999374	1.225	0.0595666	1.225	-0.999374
ENSMUSG00000120765	-0.997302	0.176939	0.665367	0.176939	-0.997302
ENSMUSG00000097927	-0.99673	0.952991	0.111432	0.952991	-0.99673
ENSMUSG00000026649	-0.996585	2.62583	0.00236682	2.62583	-0.996585
ENSMUSG00000079511	-0.996378	0.427214	0.373927	0.427214	-0.996378
ENSMUSG00000078887	-0.996036	0	1	0	-0.996036
ENSMUSG00000027639	-0.995911	2.66614	0.00215705	2.66614	-0.995911
ENSMUSG00000015305	-0.995093	0.115024	0.767318	0.115024	-0.995093
ENSMUSG00000086417	-0.994896	0.176509	0.666026	0.176509	-0.994896
ENSMUSG00000085385	-0.994588	0.140674	0.723313	0.140674	-0.994588
ENSMUSG00000105504	-0.994576	0.574408	0.266436	0.574408	-0.994576
ENSMUSG00000030562	-0.994312	0.102618	0.789554	0.102618	-0.994312
ENSMUSG00000094942	-0.994135	0.689245	0.204529	0.689245	-0.994135
ENSMUSG00000104168	-0.99411	0.74077	0.181648	0.74077	-0.99411
ENSMUSG00000001228	-0.993534	0.18429	0.654199	0.18429	-0.993534
ENSMUSG00000113591	-0.992823	0	1	0	-0.992823
ENSMUSG00000025885	-0.992801	0.161206	0.689913	0.161206	-0.992801
ENSMUSG00000053208	-0.992778	0	1	0	-0.992778
ENSMUSG00000021866	-0.992077	2.36419	0.00432322	2.36419	-0.992077
ENSMUSG00000037843	-0.991898	8.44483	3.59059e-09	8.44483	-0.991898
ENSMUSG00000097997	-0.991882	0.193629	0.640281	0.193629	-0.991882
ENSMUSG00000093989	-0.991854	0.233564	0.584031	0.233564	-0.991854
ENSMUSG00000046070	-0.991762	9.39161	4.05877e-10	9.39161	-0.991762
ENSMUSG00000019933	-0.990724	2.2978	0.00503728	2.2978	-0.990724
ENSMUSG00000092384	-0.989601	0.438825	0.364062	0.438825	-0.989601
ENSMUSG00000092570	-0.98866	0.895401	0.127233	0.895401	-0.98866
ENSMUSG00000042797	-0.988425	1.55339	0.0279647	1.55339	-0.988425
ENSMUSG00000062906	-0.986846	0.693174	0.202687	0.693174	-0.986846
ENSMUSG00000110716	-0.986253	0.257174	0.553128	0.257174	-0.986253
ENSMUSG00000075553	-0.986205	0.0849245	0.822386	0.0849245	-0.986205
ENSMUSG00000052310	-0.985871	0.597772	0.25248	0.597772	-0.985871
ENSMUSG00000029217	-0.985787	5.97601	1.05679e-06	5.97601	-0.985787
ENSMUSG00000035085	-0.985241	0	1	0	-0.985241
ENSMUSG00000114319	-0.985183	0	1	0	-0.985183
ENSMUSG00000043556	-0.984346	0.152852	0.703312	0.152852	-0.984346
ENSMUSG00000099759	-0.98408	0.592984	0.255279	0.592984	-0.98408
ENSMUSG00000120628	-0.983498	0	1	0	-0.983498
ENSMUSG00000069136	-0.983414	0.405267	0.393308	0.405267	-0.983414
ENSMUSG00000026305	-0.983329	1.90715	0.0123837	1.90715	-0.983329
ENSMUSG00000024027	-0.982954	2.11521	0.00766989	2.11521	-0.982954
ENSMUSG00000028357	-0.982928	1.73204	0.0185335	1.73204	-0.982928
ENSMUSG00000074052	-0.981715	0.054443	0.88218	0.054443	-0.981715
ENSMUSG00000079146	-0.981674	0.21894	0.604032	0.21894	-0.981674
ENSMUSG00000043289	-0.981661	0.149304	0.709082	0.149304	-0.981661
ENSMUSG00000026870	-0.981621	1.61635	0.0241909	1.61635	-0.981621
ENSMUSG00000057541	-0.980922	1.4977	0.0317904	1.4977	-0.980922
ENSMUSG00000091818	-0.98082	0	1	0	-0.98082
ENSMUSG00000095930	-0.9807	2.14952	0.00708723	2.14952	-0.9807
ENSMUSG00000044072	-0.980458	2.79521	0.00160247	2.79521	-0.980458
ENSMUSG00000028457	-0.980055	0.527615	0.296746	0.527615	-0.980055
ENSMUSG00000117900	-0.979458	0.0925045	0.808157	0.0925045	-0.979458
ENSMUSG00000087698	-0.978015	0.665151	0.216197	0.665151	-0.978015
ENSMUSG00000083608	-0.977351	0	1	0	-0.977351
ENSMUSG00000037347	-0.977016	0.12747	0.745642	0.12747	-0.977016
ENSMUSG00000120277	-0.976956	0.294353	0.507746	0.294353	-0.976956
ENSMUSG00000097305	-0.976343	0.26218	0.54679	0.26218	-0.976343
ENSMUSG00000100211	-0.9744	0.112955	0.770984	0.112955	-0.9744
ENSMUSG00000040919	-0.974159	0.462541	0.344714	0.462541	-0.974159
ENSMUSG00000088139	-0.974107	0	1	0	-0.974107
ENSMUSG00000120861	-0.973177	0	1	0	-0.973177
ENSMUSG00000074178	-0.972969	0.840986	0.144216	0.840986	-0.972969
ENSMUSG00000071103	-0.972954	0.700133	0.199465	0.700133	-0.972954
ENSMUSG00000113861	-0.971893	0	1	0	-0.971893
ENSMUSG00000022490	-0.970878	7.13628	7.30661e-08	7.13628	-0.970878
ENSMUSG00000046168	-0.969669	0.116202	0.765241	0.116202	-0.969669
ENSMUSG00000113683	-0.96949	0.168253	0.678808	0.168253	-0.96949
ENSMUSG00000087681	-0.968701	0.130727	0.740071	0.130727	-0.968701
ENSMUSG00000104444	-0.968197	2.922	0.00119674	2.922	-0.968197
ENSMUSG00000020059	-0.968052	0.899232	0.126115	0.899232	-0.968052
ENSMUSG00000120734	-0.967855	0.700933	0.199098	0.700933	-0.967855
ENSMUSG00000041592	-0.966977	1.85813	0.0138635	1.85813	-0.966977
ENSMUSG00000021193	-0.9669	4.97856	1.05061e-05	4.97856	-0.9669
ENSMUSG00000117785	-0.966623	0	1	0	-0.966623
ENSMUSG00000090516	-0.965483	0.19401	0.639721	0.19401	-0.965483
ENSMUSG00000112925	-0.964781	0.139898	0.724605	0.139898	-0.964781
ENSMUSG00000067367	-0.964433	2.75158	0.00177183	2.75158	-0.964433
ENSMUSG00000106944	-0.96367	0.137129	0.729241	0.137129	-0.96367
ENSMUSG00000002257	-0.963664	0.625083	0.237092	0.625083	-0.963664
ENSMUSG00000095562	-0.963396	0.153986	0.701478	0.153986	-0.963396
ENSMUSG00000107019	-0.963314	0.0970258	0.799787	0.0970258	-0.963314
ENSMUSG00000114167	-0.962715	0	1	0	-0.962715
ENSMUSG00000066800	-0.962429	0.384564	0.412511	0.384564	-0.962429
ENSMUSG00000103270	-0.962377	0.719648	0.1907	0.719648	-0.962377
ENSMUSG00000038641	-0.962114	0.27056	0.536339	0.27056	-0.962114
ENSMUSG00000089679	-0.961592	0.148797	0.709909	0.148797	-0.961592
ENSMUSG00000033377	-0.961426	0.560459	0.275132	0.560459	-0.961426
ENSMUSG00000075595	-0.960937	6.6737	2.11981e-07	6.6737	-0.960937
ENSMUSG00000040985	-0.959986	0.820881	0.151049	0.820881	-0.959986
ENSMUSG00000109002	-0.959904	0.252253	0.559432	0.252253	-0.959904
ENSMUSG00000030393	-0.95986	0.885566	0.130147	0.885566	-0.95986
ENSMUSG00000067719	-0.959619	0.61477	0.242789	0.61477	-0.959619
ENSMUSG00000056492	-0.959513	1.18893	0.064725	1.18893	-0.959513
ENSMUSG00000072688	-0.959432	0.28058	0.524107	0.28058	-0.959432
ENSMUSG00000118249	-0.95842	0.227196	0.592658	0.227196	-0.95842
ENSMUSG00000117080	-0.958347	0.568199	0.270272	0.568199	-0.958347
ENSMUSG00000099760	-0.957999	0.471407	0.337748	0.471407	-0.957999
ENSMUSG00000027968	-0.957742	2.08562	0.00821071	2.08562	-0.957742
ENSMUSG00000059854	-0.956638	0.0413719	0.909134	0.0413719	-0.956638
ENSMUSG00000110229	-0.956465	0.393048	0.404531	0.393048	-0.956465
ENSMUSG00000063663	-0.95628	0.132475	0.737098	0.132475	-0.95628
ENSMUSG00000098076	-0.956055	0.110936	0.774577	0.110936	-0.956055
ENSMUSG00000046814	-0.955747	0.226578	0.593502	0.226578	-0.955747
ENSMUSG00000061410	-0.95502	1.24453	0.0569466	1.24453	-0.95502
ENSMUSG00000114282	-0.954853	0.155105	0.699672	0.155105	-0.954853
ENSMUSG00000001761	-0.954851	0.478909	0.331964	0.478909	-0.954851
ENSMUSG00000022026	-0.95459	0.951922	0.111707	0.951922	-0.95459
ENSMUSG00000115596	-0.954111	0	1	0	-0.954111
ENSMUSG00000086567	-0.954098	0.381427	0.415502	0.381427	-0.954098
ENSMUSG00000110303	-0.953398	0.195412	0.637659	0.195412	-0.953398
ENSMUSG00000029384	-0.952625	0.293923	0.508249	0.293923	-0.952625
ENSMUSG00000025480	-0.952247	0.325248	0.472881	0.325248	-0.952247
ENSMUSG00000043410	-0.952183	0.129417	0.742307	0.129417	-0.952183
ENSMUSG00000006289	-0.952167	6.24503	5.68815e-07	6.24503	-0.952167
ENSMUSG00000037386	-0.950676	3.01377	0.000968797	3.01377	-0.950676
ENSMUSG00000049950	-0.950442	2.33249	0.00465057	2.33249	-0.950442
ENSMUSG00000118292	-0.95032	0.154691	0.70034	0.154691	-0.95032
ENSMUSG00000073415	-0.950213	0.197778	0.634194	0.197778	-0.950213
ENSMUSG00000038167	-0.949117	0.222404	0.599233	0.222404	-0.949117
ENSMUSG00000032633	-0.948893	5.29693	5.04737e-06	5.29693	-0.948893
ENSMUSG00000098306	-0.948575	0	1	0	-0.948575
ENSMUSG00000032313	-0.947921	1.28546	0.0518248	1.28546	-0.947921
ENSMUSG00000085016	-0.947165	0.110587	0.775199	0.110587	-0.947165
ENSMUSG00000029471	-0.947017	2.18296	0.00656205	2.18296	-0.947017
ENSMUSG00000000440	-0.94687	1.84927	0.0141491	1.84927	-0.94687
ENSMUSG00000107455	-0.946135	0	1	0	-0.946135
ENSMUSG00000105641	-0.946039	0	1	0	-0.946039
ENSMUSG00000108436	-0.945861	0	1	0	-0.945861
ENSMUSG00000111547	-0.943471	0.290725	0.512006	0.290725	-0.943471
ENSMUSG00000002108	-0.941431	3.29124	0.0005114	3.29124	-0.941431
ENSMUSG00000030827	-0.941373	0.209668	0.617067	0.209668	-0.941373
ENSMUSG00000120783	-0.94085	0.0665131	0.857999	0.0665131	-0.94085
ENSMUSG00000096755	-0.940048	0.458613	0.347846	0.458613	-0.940048
ENSMUSG00000112006	-0.939448	0.0888054	0.815069	0.0888054	-0.939448
ENSMUSG00000071470	-0.939395	0.0560615	0.878898	0.0560615	-0.939395
ENSMUSG00000044197	-0.939283	1.4436	0.0360084	1.4436	-0.939283
ENSMUSG00000041852	-0.938232	1.20625	0.0621935	1.20625	-0.938232
ENSMUSG00000038010	-0.937663	1.07898	0.0833712	1.07898	-0.937663
ENSMUSG00000120686	-0.93741	0.99937	0.100145	0.99937	-0.93741
ENSMUSG00000078635	-0.936514	0	1	0	-0.936514
ENSMUSG00000087151	-0.936388	0.0871073	0.818263	0.0871073	-0.936388
ENSMUSG00000057715	-0.934981	0.352613	0.444004	0.352613	-0.934981
ENSMUSG00000025290	-0.934446	7.61242	2.44109e-08	7.61242	-0.934446
ENSMUSG00000046169	-0.934366	0.19712	0.635156	0.19712	-0.934366
ENSMUSG00000091383	-0.934253	0.150849	0.706564	0.150849	-0.934253
ENSMUSG00000027296	-0.934205	0.774364	0.168126	0.774364	-0.934205
ENSMUSG00000078864	-0.933889	0.590944	0.256482	0.590944	-0.933889
ENSMUSG00000024530	-0.932985	0.405729	0.39289	0.405729	-0.932985
ENSMUSG00000052698	-0.932966	3.16896	0.000677712	3.16896	-0.932966
ENSMUSG00000031517	-0.930914	1.7064	0.0196608	1.7064	-0.930914
ENSMUSG00000032065	-0.930199	0.110037	0.776181	0.110037	-0.930199
ENSMUSG00000031022	-0.929888	0	1	0	-0.929888
ENSMUSG00000059772	-0.929141	1.50917	0.0309623	1.50917	-0.929141
ENSMUSG00000035769	-0.928979	1.56877	0.0269914	1.56877	-0.928979
ENSMUSG00000011171	-0.928692	0.603503	0.249171	0.603503	-0.928692
ENSMUSG00000062866	-0.927142	0.941924	0.114308	0.941924	-0.927142
ENSMUSG00000047635	-0.926816	1.69177	0.0203345	1.69177	-0.926816
ENSMUSG00000004266	-0.926295	3.19263	0.000641755	3.19263	-0.926295
ENSMUSG00000036086	-0.926276	0.899801	0.12595	0.899801	-0.926276
ENSMUSG00000022272	-0.926241	1.87304	0.0133957	1.87304	-0.926241
ENSMUSG00000103375	-0.92615	0	1	0	-0.92615
ENSMUSG00000000876	-0.926123	5.1515	7.05509e-06	5.1515	-0.926123
ENSMUSG00000022323	-0.925993	2.96556	0.00108252	2.96556	-0.925993
ENSMUSG00000039563	-0.925355	0.251605	0.560267	0.251605	-0.925355
ENSMUSG00000111737	-0.924818	0.13306	0.736105	0.13306	-0.924818
ENSMUSG00000081559	-0.924772	0	1	0	-0.924772
ENSMUSG00000108506	-0.924462	0.153361	0.702489	0.153361	-0.924462
ENSMUSG00000120160	-0.92425	0.441155	0.362114	0.441155	-0.92425
ENSMUSG00000037737	-0.924101	0.478207	0.332501	0.478207	-0.924101
ENSMUSG00000036572	-0.923877	2.94632	0.00113157	2.94632	-0.923877
[truncated: 18,837 more rows]

## Sheet: Chd3+4Db_DEG_FldChg>2_p<0.05
GeneId	Symbol	Gene Name	diffExpr DKO vs. CONTROL
ENSMUSG00000109209	Gm45104	predicted gene 45104	-9.4504
ENSMUSG00000001493	Meox1	mesenchyme homeobox 1	-9.42458
ENSMUSG00000055235	Wdr86	WD repeat domain 86	-8.8208
ENSMUSG00000086708	Gm15577	predicted gene 15577	-8.06207
ENSMUSG00000029608	Rph3a	rabphilin 3A	-7.71758
ENSMUSG00000060183	Cxcl11	chemokine (C-X-C motif) ligand 11	-7.30266
ENSMUSG00000109262	Gm44744	predicted gene 44744	-6.98866
ENSMUSG00000030230	Plcz1	phospholipase C, zeta 1	-6.67535
ENSMUSG00000029847	Slc23a4	solute carrier family 23 member 4	-6.6706
ENSMUSG00000063260	Syt10	synaptotagmin X	-6.65932
ENSMUSG00000116965	Gm36742	predicted gene, 36742	-6.49435
ENSMUSG00000081225	Cyp2j12	cytochrome P450, family 2, subfamily j, polypeptide 12	-6.47209
ENSMUSG00000040046	Tph1	tryptophan hydroxylase 1	-6.4072
ENSMUSG00000037999	Arap2	ArfGAP with RhoGAP domain, ankyrin repeat and PH domain 2	-6.37159
ENSMUSG00000050818	Or2t48	olfactory receptor family 2 subfamily T member 48	-6.09255
ENSMUSG00000029868	Trpv6	transient receptor potential cation channel, subfamily V, member 6	-6.08767
ENSMUSG00000039714	Cplx3	complexin 3	-6.06102
ENSMUSG00000027386	Fbln7	fibulin 7	-5.98023
ENSMUSG00000057173	Rfx8	regulatory factor X 8	-5.95527
ENSMUSG00000026787	Gad2	glutamic acid decarboxylase 2	-5.91128
ENSMUSG00000118837	Rnu2-10	U2 small nuclear RNA 10	-5.86358
ENSMUSG00000114121	Gm47728	predicted gene, 47728	-5.81441
ENSMUSG00000027855	Sycp1	synaptonemal complex protein 1	-5.74581
ENSMUSG00000032057	Hoatz	HOATZ cilia and flagella associated protein	-5.64937
ENSMUSG00000084938	BB557941	expressed sequence BB557941	-5.42943
ENSMUSG00000046213	Cym	chymosin	-5.41427
ENSMUSG00000070683	Lactbl1	lactamase, beta-like 1	-5.40672
ENSMUSG00000076435	Acsf2	acyl-CoA synthetase family member 2	-5.36773
ENSMUSG00000087029	Gm14133	predicted gene 14133	-5.31929
ENSMUSG00000115164	Gm30159	predicted gene, 30159	-5.28442
ENSMUSG00000120667	ENSMUSG00000120667	novel transcript	-5.26317
ENSMUSG00000030054	Gp9	glycoprotein 9 (platelet)	-5.26269
ENSMUSG00000050944	Efcab5	EF-hand calcium binding domain 5	-5.20473
ENSMUSG00000086262	A930031H19Rik	RIKEN cDNA A930031H19 gene	-5.18673
ENSMUSG00000025432	Avil	advillin	-5.18127
ENSMUSG00000104273	A530064N14Rik	RIKEN cDNA A530064N14 gene	-5.13073
ENSMUSG00000116616	Gm49688	predicted gene, 49688	-4.98003
ENSMUSG00000119892	Gm23971	predicted gene, 23971	-4.96017
ENSMUSG00000103119	Gm37583	predicted gene, 37583	-4.95409
ENSMUSG00000066258	Trim12a	tripartite motif-containing 12A	-4.93714
ENSMUSG00000098072	Gm26995	predicted gene, 26995	-4.85628
ENSMUSG00000086447	Gm13522	predicted gene 13522	-4.64944
ENSMUSG00000066607	Insyn1	inhibitory synaptic factor 1	-4.60634
ENSMUSG00000120740	ENSMUSG00000120740	novel transcript	-4.60037
ENSMUSG00000074736	Syndig1	synapse differentiation inducing 1	-4.38695
ENSMUSG00000070368	Prok1	prokineticin 1	-4.21404
ENSMUSG00000050520	Cldn8	claudin 8	-4.17118
ENSMUSG00000094613	A630076J17Rik	RIKEN cDNA A630076J17 gene	-4.14335
ENSMUSG00000099162	Gm27168	predicted gene 27168	-4.09841
ENSMUSG00000033826	Dnah8	dynein, axonemal, heavy chain 8	-4.02758
ENSMUSG00000004359	Spic	Spi-C transcription factor (Spi-1/PU.1 related)	-3.91104
ENSMUSG00000040125	Gpr26	G protein-coupled receptor 26	-3.8862
ENSMUSG00000073805	Insyn2a	inhibitory synaptic factor 2A	-3.88306
ENSMUSG00000073529	F830208F22Rik	RIKEN cDNA F830208F22 gene	-3.80814
ENSMUSG00000046719	Nxph3	neurexophilin 3	-3.79937
ENSMUSG00000121040	ENSMUSG00000121040	novel transcript	-3.79719
ENSMUSG00000086363	A330102I10Rik	RIKEN cDNA A330102I10 gene	-3.74848
ENSMUSG00000032036	Kirrel3	kirre like nephrin family adhesion molecule 3	-3.70504
ENSMUSG00000041617	Ccdc74a	coiled-coil domain containing 74A	-3.70071
ENSMUSG00000051590	Map3k19	mitogen-activated protein kinase kinase kinase 19	-3.68181
ENSMUSG00000021700	Rab3c	RAB3C, member RAS oncogene family	-3.58942
ENSMUSG00000024135	Srbd1	S1 RNA binding domain 1	-3.58516
ENSMUSG00000098534	Gm27167	predicted gene 27167	-3.57497
ENSMUSG00000071342	Lsmem1	leucine-rich single-pass membrane protein 1	-3.53348
ENSMUSG00000083672	Kpna2-ps	Kpna2 retrotransposed pseudogene	-3.39961
ENSMUSG00000031373	Car5b	carbonic anhydrase 5b, mitochondrial	-3.39558
ENSMUSG00000041301	Cftr	cystic fibrosis transmembrane conductance regulator	-3.39078
ENSMUSG00000040181	Fmo1	flavin containing monooxygenase 1	-3.38134
ENSMUSG00000116030	Gm49500	predicted gene, 49500	-3.3428
ENSMUSG00000120562	ENSMUSG00000120562	novel transcript	-3.32568
ENSMUSG00000118119	Gm9937	predicted gene 9937	-3.10504
ENSMUSG00000045053	Kcng3	potassium voltage-gated channel, subfamily G, member 3	-3.08704
ENSMUSG00000111888	Gm46212	predicted gene, 46212	-3.07819
ENSMUSG00002076161	Rn7sk	RNA, 7SK, nuclear	-3.06108
ENSMUSG00000025666	Tmem47	transmembrane protein 47	-3.04334
ENSMUSG00000029101	Rgs12	regulator of G-protein signaling 12	-3.02915
ENSMUSG00000041992	Rapgef5	Rap guanine nucleotide exchange factor (GEF) 5	-2.97037
ENSMUSG00000114721	Gm47938	predicted gene, 47938	-2.96369
ENSMUSG00000020609	Apob	apolipoprotein B	-2.83662
ENSMUSG00000090387	Gm17056	predicted gene 17056	-2.81595
ENSMUSG00000022324	Matn2	matrilin 2	-2.7921
ENSMUSG00000064010	Dppa1	developmental pluripotency associated 1	-2.71592
ENSMUSG00000030523	Trpm1	transient receptor potential cation channel, subfamily M, member 1	-2.66512
ENSMUSG00000025716	Myo3a	myosin IIIA	-2.63667
ENSMUSG00000044447	Dock5	dedicator of cytokinesis 5	-2.60436
ENSMUSG00000026832	Cytip	cytohesin 1 interacting protein	-2.59957
ENSMUSG00000052551	Adarb2	adenosine deaminase, RNA-specific, B2	-2.58584
ENSMUSG00000032023	Jhy	junctional cadherin complex regulator	-2.55093
ENSMUSG00000029659	Medag	mesenteric estrogen dependent adipogenesis	-2.53697
ENSMUSG00000034164	Emid1	EMI domain containing 1	-2.5279
ENSMUSG00000028584	Lrrc38	leucine rich repeat containing 38	-2.47046
ENSMUSG00000020014	Cfap54	cilia and flagella associated protein 54	-2.45032
ENSMUSG00000120607	ENSMUSG00000120607	novel transcript	-2.43111
ENSMUSG00000029919	Hpgds	hematopoietic prostaglandin D synthase	-2.42464
ENSMUSG00000085007	Smim43	small integral membrane protein 43	-2.42226
ENSMUSG00000025189	Cnnm1	cyclin M1	-2.40237
ENSMUSG00000109812	Gm45640	predicted gene 45640	-2.39383
ENSMUSG00000073079	Srp54a	signal recognition particle 54A	-2.39138
ENSMUSG00000115441	Gm34759	predicted gene, 34759	-2.37047
ENSMUSG00000112139	Gm47431	predicted gene, 47431	-2.36391
ENSMUSG00000106224	Gm43823	predicted gene 43823	-2.36165
ENSMUSG00000028635	Edn2	endothelin 2	-2.36129
ENSMUSG00000058159	T2	brachyury 2	-2.35804
ENSMUSG00000043099	Hic1	hypermethylated in cancer 1	-2.35507
ENSMUSG00000030075	Cntn3	contactin 3	-2.35187
ENSMUSG00000030865	Chp2	calcineurin-like EF hand protein 2	-2.32329
ENSMUSG00000026185	Igfbp5	insulin-like growth factor binding protein 5	-2.30268
ENSMUSG00000111580	Gm19572	predicted gene, 19572	-2.29918
ENSMUSG00000053137	Mapk11	mitogen-activated protein kinase 11	-2.27053
ENSMUSG00000028517	Plpp3	phospholipid phosphatase 3	-2.25655
ENSMUSG00000094447	9430069I07Rik	RIKEN cDNA 9430069I07 gene	-2.2513
ENSMUSG00000075520	Malrd1	MAM and LDL receptor class A domain containing 1	-2.24465
ENSMUSG00000091405	H4c14	H4 clustered histone 14	-2.18594
ENSMUSG00000032172	Olfm2	olfactomedin 2	-2.15613
ENSMUSG00000113074	Gm3772	predicted gene 3772	-2.15603
ENSMUSG00000020878	Lrrc46	leucine rich repeat containing 46	-2.14807
ENSMUSG00000018474	Chd3	chromodomain helicase DNA binding protein 3	-2.14278
ENSMUSG00000008461	Fut1	fucosyltransferase 1	-2.13068
ENSMUSG00000026692	Fmo4	flavin containing monooxygenase 4	-2.11567
ENSMUSG00000033342	Plppr5	phospholipid phosphatase related 5	-2.11213
ENSMUSG00000061126	Cyp4f39	cytochrome P450, family 4, subfamily f, polypeptide 39	-2.10614
ENSMUSG00000031981	Capn9	calpain 9	-2.09818
ENSMUSG00000051726	Kcnf1	potassium voltage-gated channel, subfamily F, member 1	-2.09429
ENSMUSG00000045761	Togaram2	TOG array regulator of axonemal microtubules 2	-2.0901
ENSMUSG00000020990	Cdkl1	cyclin-dependent kinase-like 1 (CDC2-related kinase)	-2.08895
ENSMUSG00000025221	Kcnip2	Kv channel-interacting protein 2	-2.08522
ENSMUSG00000004360	9330159F19Rik	RIKEN cDNA 9330159F19 gene	-2.07589
ENSMUSG00000092741	Mir3074-1	microRNA 3074-1	-2.07033
ENSMUSG00000052102	Gnpda1	glucosamine-6-phosphate deaminase 1	-2.0688
ENSMUSG00000048126	Col6a3	collagen, type VI, alpha 3	-2.04771
ENSMUSG00000019768	Esr1	estrogen receptor 1 (alpha)	-2.04228
ENSMUSG00000087259	2610035D17Rik	RIKEN cDNA 2610035D17 gene	-2.04153
ENSMUSG00000032289	Thsd4	thrombospondin, type I, domain containing 4	-2.03557
ENSMUSG00000024366	Gfra3	glial cell line derived neurotrophic factor family receptor alpha 3	-2.03232
ENSMUSG00000047842	Diras2	DIRAS family, GTP-binding RAS-like 2	-2.01452
ENSMUSG00000108006	Gm44418	predicted gene, 44418	-1.99619
ENSMUSG00000019088	Dnase1l1	deoxyribonuclease 1-like 1	-1.99217
ENSMUSG00000087480	Gm15910	predicted gene 15910	-1.99191
ENSMUSG00000040613	Apobec1	apolipoprotein B mRNA editing enzyme, catalytic polypeptide 1	-1.98756
ENSMUSG00000048445	Ccdc57	coiled-coil domain containing 57	-1.9802
ENSMUSG00000062275	Fbxw24	F-box and WD-40 domain protein 24	-1.97432
ENSMUSG00000092500	Gm20400	predicted gene 20400	-1.94521
ENSMUSG00000109599	Gm31812	predicted gene, 31812	-1.94373
ENSMUSG00000024177	Nme4	NME/NM23 nucleoside diphosphate kinase 4	-1.93631
ENSMUSG00000097766	5730420D15Rik	RIKEN cDNA 5730420D15 gene	-1.92188
ENSMUSG00000026979	Psd4	pleckstrin and Sec7 domain containing 4	-1.90342
ENSMUSG00000120963	ENSMUSG00000120963	novel transcript, antisense to KO:Pard3and Pard3	-1.90256
ENSMUSG00000085154	C130046K22Rik	RIKEN cDNA C130046K22 gene	-1.89208
ENSMUSG00000092021	Gbp11	guanylate binding protein 11	-1.8726
ENSMUSG00000041831	Sytl3	synaptotagmin-like 3	-1.86906
ENSMUSG00000086279	Gm15634	predicted gene 15634	-1.86321
ENSMUSG00000120584	Gm26641	predicted gene, 26641	-1.86259
ENSMUSG00000117731	Gm50145	predicted gene, 50145	-1.85793
ENSMUSG00000085776	5430402O13Rik	RIKEN cDNA 5430402O13 gene	-1.85183
ENSMUSG00000073733	Cplane2	ciliogenesis and planar polarity effector 2	-1.84121
ENSMUSG00000085396	Firre	functional intergenic repeating RNA element	-1.83582
ENSMUSG00000060579	Fhit	fragile histidine triad gene	-1.83128
ENSMUSG00000039116	Adgrg6	adhesion G protein-coupled receptor G6	-1.82952
ENSMUSG00000064141	Zfp69	zinc finger protein 69	-1.81912
ENSMUSG00000044646	Zbtb7c	zinc finger and BTB domain containing 7C	-1.81789
ENSMUSG00000085629	Gm11697	predicted gene 11697	-1.80515
ENSMUSG00000097320	Tmem147os	transmembrane protein 147, opposite strand	-1.77465
ENSMUSG00000043583	4930470P17Rik	RIKEN cDNA 4930470P17 gene	-1.76753
ENSMUSG00000042359	Osbpl6	oxysterol binding protein-like 6	-1.72851
ENSMUSG00000026834	Acvr1c	activin A receptor, type IC	-1.72533
ENSMUSG00000020892	Aloxe3	arachidonate lipoxygenase 3	-1.72095
ENSMUSG00000042246	Tmc7	transmembrane channel-like gene family 7	-1.71814
ENSMUSG00000036853	Mcoln3	mucolipin 3	-1.71594
ENSMUSG00000061755	Bod1l	biorientation of chromosomes in cell division 1-like	-1.71195
ENSMUSG00000043088	Il17re	interleukin 17 receptor E	-1.69494
ENSMUSG00000040183	Ankrd6	ankyrin repeat domain 6	-1.68775
ENSMUSG00000020181	Nav3	neuron navigator 3	-1.68177
ENSMUSG00000034154	Ino80	INO80 complex subunit	-1.67396
ENSMUSG00000029596	Sdsl	serine dehydratase-like	-1.67024
ENSMUSG00000047632	Fgfbp3	fibroblast growth factor binding protein 3	-1.66771
ENSMUSG00000024552	Slc14a2	solute carrier family 14 (urea transporter), member 2	-1.66594
ENSMUSG00000042589	Cux2	cut-like homeobox 2	-1.66095
ENSMUSG00000024960	Plcb3	phospholipase C, beta 3	-1.65993
ENSMUSG00000052557	Gan	giant axonal neuropathy	-1.64999
ENSMUSG00000089835	Gm7097	predicted gene 7097	-1.62213
ENSMUSG00000037762	Slc16a9	solute carrier family 16 (monocarboxylic acid transporters), member 9	-1.61118
ENSMUSG00000021596	Mctp1	multiple C2 domains, transmembrane 1	-1.60123
ENSMUSG00000047161	Chst9	carbohydrate (N-acetylgalactosamine 4-0) sulfotransferase 9	-1.58577
ENSMUSG00000003824	Syce2	synaptonemal complex central element protein 2	-1.58314
ENSMUSG00000033420	Antxr1	anthrax toxin receptor 1	-1.5783
ENSMUSG00000031478	Nek3	NIMA (never in mitosis gene a)-related expressed kinase 3	-1.56556
ENSMUSG00000040525	Cblc	Casitas B-lineage lymphoma c	-1.56046
ENSMUSG00000053226	Dand5	DAN domain family member 5, BMP antagonist	-1.54775
ENSMUSG00000041782	Lad1	ladinin	-1.54714
ENSMUSG00000030785	Cox6a2	cytochrome c oxidase subunit 6A2	-1.54443
ENSMUSG00000040170	Fmo2	flavin containing monooxygenase 2	-1.54391
ENSMUSG00000020635	Fkbp1b	FK506 binding protein 1b	-1.53967
ENSMUSG00000108521	Gm44639	predicted gene 44639	-1.53477
ENSMUSG00000044017	Adgrd1	adhesion G protein-coupled receptor D1	-1.52785
ENSMUSG00000086762	Gm14546	predicted gene 14546	-1.52277
ENSMUSG00000063558	Aox1	aldehyde oxidase 1	-1.52105
ENSMUSG00000057058	Skap1	src family associated phosphoprotein 1	-1.5076
ENSMUSG00000006717	Acot13	acyl-CoA thioesterase 13	-1.50449
ENSMUSG00000062210	Tnfaip8	tumor necrosis factor, alpha-induced protein 8	-1.49653
ENSMUSG00000030255	Sspn	sarcospan	-1.49091
ENSMUSG00000031765	Mt1	metallothionein 1	-1.48834
ENSMUSG00000052387	Trpm3	transient receptor potential cation channel, subfamily M, member 3	-1.4838
ENSMUSG00000120847	ENSMUSG00000120847	novel transcript, antisense to KO:Ankrd24and Ankrd24	-1.48327
ENSMUSG00000030498	Gas2	growth arrest specific 2	-1.46937
ENSMUSG00000037824	Tspan14	tetraspanin 14	-1.46574
ENSMUSG00000054136	Adm2	adrenomedullin 2	-1.46073
ENSMUSG00000023262	Acy1	aminoacylase 1	-1.44825
ENSMUSG00000006711	D130043K22Rik	RIKEN cDNA D130043K22 gene	-1.44571
ENSMUSG00000023826	Prkn	parkin RBR E3 ubiquitin protein ligase	-1.44395
ENSMUSG00000054304	D130007C19Rik	RIKEN cDNA D130007C19 gene	-1.44009
ENSMUSG00000020814	Mxra7	matrix-remodelling associated 7	-1.43831
ENSMUSG00000054169	Ceacam10	CEA cell adhesion molecule 10	-1.43753
ENSMUSG00000097184	4632428C04Rik	RIKEN cDNA 4632428C04 gene	-1.43385
ENSMUSG00000064369	mt-Te	mitochondrially encoded tRNA glutamic acid	-1.41866
ENSMUSG00000048483	Zdhhc22	zinc finger, DHHC-type containing 22	-1.41703
ENSMUSG00000121082	ENSMUSG00000121082	novel transcript, antisense to Dennd6b	-1.41013
ENSMUSG00000085838	Chn1os1	chimerin 1, opposite strand 1	-1.40821
ENSMUSG00000025241	Fyco1	FYVE and coiled-coil domain containing 1	-1.40585
ENSMUSG00000116114	Gm35853	predicted gene, 35853	-1.40244
ENSMUSG00000117662	Gm4013	predicted gene 4013	-1.38477
ENSMUSG00000022211	Carmil3	capping protein regulator and myosin 1 linker 3	-1.38223
ENSMUSG00000110440	Gm45894	predicted gene 45894	-1.38082
ENSMUSG00000105850	Gm2861	predicted gene 2861	-1.38009
ENSMUSG00000045658	Pid1	phosphotyrosine interaction domain containing 1	-1.37915
ENSMUSG00000040724	Kcna2	potassium voltage-gated channel, shaker-related subfamily, member 2	-1.37161
ENSMUSG00000048779	P2ry6	pyrimidinergic receptor P2Y, G-protein coupled, 6	-1.36563
ENSMUSG00000063870	Chd4	chromodomain helicase DNA binding protein 4	-1.36377
ENSMUSG00000021795	Sftpd	surfactant associated protein D	-1.35772
ENSMUSG00000071713	Csf2rb	colony stimulating factor 2 receptor, beta, low-affinity (granulocyte-macrophage)	-1.34983
ENSMUSG00000039713	Plekhg5	pleckstrin homology domain containing, family G (with RhoGef domain) member 5	-1.34724
ENSMUSG00000066752	Gm10176	predicted gene 10176	-1.34637
ENSMUSG00000032850	Rnft2	ring finger protein, transmembrane 2	-1.34596
ENSMUSG00000053898	Ech1	enoyl coenzyme A hydratase 1, peroxisomal	-1.34374
ENSMUSG00000110588	Gm45774	predicted gene 45774	-1.33722
ENSMUSG00000019990	Pde7b	phosphodiesterase 7B	-1.33556
ENSMUSG00000019971	Cep290	centrosomal protein 290	-1.32658
ENSMUSG00000070880	Gad1	glutamate decarboxylase 1	-1.32276
ENSMUSG00000005131	4930550C14Rik	RIKEN cDNA 4930550C14 gene	-1.31971
ENSMUSG00000030246	Ldhb	lactate dehydrogenase B	-1.31949
ENSMUSG00000026278	Bok	BCL2-related ovarian killer	-1.31624
ENSMUSG00000050503	Fbxl22	F-box and leucine-rich repeat protein 22	-1.30874
ENSMUSG00000031629	Cenpu	centromere protein U	-1.30574
ENSMUSG00000091985	Gm17354	predicted gene, 17354	-1.30288
ENSMUSG00000040147	Maob	monoamine oxidase B	-1.30175
ENSMUSG00000060771	Tsga10	testis specific 10	-1.29798
ENSMUSG00000031107	Rbmx2	RNA binding motif protein, X-linked 2	-1.28502
ENSMUSG00000097047	1110020A21Rik	RIKEN cDNA 1110020A21 gene	-1.27865
ENSMUSG00000034681	Rnps1	RNA binding protein with serine rich domain 1	-1.27612
ENSMUSG00000041625	Ggact	gamma-glutamylamine cyclotransferase	-1.27543
ENSMUSG00000108353	Gm45205	predicted gene 45205	-1.27538
ENSMUSG00000026158	Ogfrl1	opioid growth factor receptor-like 1	-1.27317
ENSMUSG00000052783	Grk4	G protein-coupled receptor kinase 4	-1.27232
ENSMUSG00000018168	Ikzf3	IKAROS family zinc finger 3	-1.26247
ENSMUSG00000031762	Mt2	metallothionein 2	-1.26092
ENSMUSG00000026443	Lrrn2	leucine rich repeat protein 2, neuronal	-1.26089
ENSMUSG00000026483	Niban1	niban apoptosis regulator 1	-1.25815
ENSMUSG00000040978	Gm11992	predicted gene 11992	-1.258
ENSMUSG00000018449	Rpain	RPA interacting protein	-1.25652
ENSMUSG00000109814	Gm45847	predicted gene 45847	-1.2559
ENSMUSG00000037606	Osbpl5	oxysterol binding protein-like 5	-1.2557
ENSMUSG00000029153	Ociad2	OCIA domain containing 2	-1.25255
ENSMUSG00000051037	Zfp455	zinc finger protein 455	-1.24981
ENSMUSG00000028443	Nudt2	nudix (nucleoside diphosphate linked moiety X)-type motif 2	-1.249
ENSMUSG00000015568	Lpl	lipoprotein lipase	-1.2456
ENSMUSG00000030323	Ift122	intraflagellar transport 122	-1.24486
ENSMUSG00000032431	Crtap	cartilage associated protein	-1.24289
ENSMUSG00000103560	Gm38070	predicted gene, 38070	-1.23634
ENSMUSG00000029432	Nipsnap2	nipsnap homolog 2	-1.23483
ENSMUSG00000107317	Gm19719	predicted gene, 19719	-1.23384
ENSMUSG00000052426	Gm9877	predicted gene 9877	-1.23276
ENSMUSG00000030717	Nupr1	nuclear protein transcription regulator 1	-1.23107
ENSMUSG00000006764	Tph2	tryptophan hydroxylase 2	-1.22788
ENSMUSG00000029923	Rab19	RAB19, member RAS oncogene family	-1.22567
ENSMUSG00000041842	Fhdc1	FH2 domain containing 1	-1.22461
ENSMUSG00000059970	Hspa2	heat shock protein 2	-1.22365
ENSMUSG00000021932	Rnaseh2b	ribonuclease H2, subunit B	-1.22329
ENSMUSG00000121486	Zfp783	zinc finger protein 783	-1.22268
ENSMUSG00000020620	Abca8b	ATP-binding cassette, sub-family A (ABC1), member 8b	-1.22179
ENSMUSG00000110086	Smim32	small integral membrane protein 32	-1.22106
ENSMUSG00000018428	Akap1	A kinase (PRKA) anchor protein 1	-1.22099
ENSMUSG00000112375	Gm38560	predicted gene, 38560	-1.21929
ENSMUSG00000045284	Dcaf12l1	DDB1 and CUL4 associated factor 12-like 1	-1.21907
ENSMUSG00000033209	Ttc28	tetratricopeptide repeat domain 28	-1.21828
ENSMUSG00000002107	Celf2	CUGBP, Elav-like family member 2	-1.21549
ENSMUSG00000026650	Meig1	meiosis expressed gene 1	-1.21535
ENSMUSG00000021379	Id4	inhibitor of DNA binding 4	-1.21528
ENSMUSG00000042655	Shisal2b	shisa like 2B	-1.21283
ENSMUSG00000025779	Ly96	lymphocyte antigen 96	-1.21278
ENSMUSG00000026627	Pacc1	proton activated chloride channel 1	-1.2127
ENSMUSG00000086712	Mexis	macrophage expressed LXRa(NR1H3)-dependent amplifier of Abca1 transcription lncRNA	-1.21156
ENSMUSG00000039628	Hs3st6	heparan sulfate (glucosamine) 3-O-sulfotransferase 6	-1.21139
ENSMUSG00000121141	ENSMUSG00000121141	novel transcript	-1.21132
ENSMUSG00000051113	Garin5a	golgi associated RAB2 interactor 5A	-1.21004
ENSMUSG00000025429	Pstpip2	proline-serine-threonine phosphatase-interacting protein 2	-1.20991
ENSMUSG00000116287	Gm3924	predicted gene 3924	-1.20892
ENSMUSG00000097924	A730020E08Rik	RIKEN cDNA A730020E08 gene	-1.20801
ENSMUSG00000087575	Gm12976	predicted gene 12976	-1.20684
ENSMUSG00000111133	Gm5831	predicted gene 5831	-1.20439
ENSMUSG00000051000	Fhip1a	FHF complex subunit HOOK interacting protein 1A	-1.20436
ENSMUSG00000025856	Pdgfa	platelet derived growth factor, alpha	-1.20421
ENSMUSG00000025175	Fn3k	fructosamine 3 kinase	-1.20311
ENSMUSG00000101655	2310040G24Rik	RIKEN cDNA 2310040G24 gene	-1.20293
ENSMUSG00000006005	Tpr	translocated promoter region, nuclear basket protein	-1.20151
ENSMUSG00000052085	Dock8	dedicator of cytokinesis 8	-1.20046
ENSMUSG00000033488	Cryzl2	crystallin zeta like 2	-1.1995
ENSMUSG00000041895	Wipi1	WD repeat domain, phosphoinositide interacting 1	-1.19808
ENSMUSG00000034949	Zfr2	zinc finger RNA binding protein 2	-1.19788
ENSMUSG00000110830	Gm46218	predicted gene, 46218	-1.19604
ENSMUSG00000034243	Golgb1	golgi autoantigen, golgin subfamily b, macrogolgin 1	-1.19514
ENSMUSG00000087411	Gm16048	predicted gene 16048	-1.19505
ENSMUSG00000030793	Pycard	PYD and CARD domain containing	-1.19269
ENSMUSG00000025318	Jph3	junctophilin 3	-1.19217
ENSMUSG00000090093	Gm14399	predicted gene 14399	-1.18611
ENSMUSG00000026083	Eif5b	eukaryotic translation initiation factor 5B	-1.18125
ENSMUSG00000050640	Tmem150c	transmembrane protein 150C	-1.17992
ENSMUSG00000044350	Lacc1	laccase domain containing 1	-1.17576
ENSMUSG00000020262	Adarb1	adenosine deaminase, RNA-specific, B1	-1.17414
ENSMUSG00000056486	Chn1	chimerin 1	-1.17387
ENSMUSG00000032892	Rangrf	RAN guanine nucleotide release factor	-1.17373
ENSMUSG00000053965	Pde5a	phosphodiesterase 5A, cGMP-specific	-1.17283
ENSMUSG00000120019	ENSMUSG00000120019	novel transcript	-1.17282
ENSMUSG00000015405	Ace2	angiotensin I converting enzyme (peptidyl-dipeptidase A) 2	-1.17098
ENSMUSG00000108207	1810059H22Rik	RIKEN cDNA 1810059H22 gene	-1.17074
ENSMUSG00000026544	Dusp23	dual specificity phosphatase 23	-1.17051
ENSMUSG00000024170	Telo2	telomere maintenance 2	-1.16492
ENSMUSG00000025366	Esyt1	extended synaptotagmin-like protein 1	-1.16373
ENSMUSG00000097383	1500026H17Rik	RIKEN cDNA 1500026H17 gene	-1.16284
ENSMUSG00000040661	Rad54l2	RAD54 like 2 (S. cerevisiae)	-1.15964
ENSMUSG00000064337	mt-Rnr1	mitochondrially encoded 12S rRNA	-1.14844
ENSMUSG00000018740	Slc25a35	solute carrier family 25, member 35	-1.14664
ENSMUSG00000086544	Chn1os3	chimerin 1, opposite strand 3	-1.1439
ENSMUSG00000025193	Cutc	cutC copper transporter	-1.14356
ENSMUSG00000014599	Csf1	colony stimulating factor 1 (macrophage)	-1.1398
ENSMUSG00000034424	Gcsh	glycine cleavage system protein H (aminomethyl carrier)	-1.13869
ENSMUSG00000027350	Chgb	chromogranin B	-1.13607
ENSMUSG00000020027	Socs2	suppressor of cytokine signaling 2	-1.13345
ENSMUSG00000019905	Gprc6a	G protein-coupled receptor, family C, group 6, member A	-1.13344
ENSMUSG00000042496	Prdm10	PR domain containing 10	-1.13061
ENSMUSG00000027610	Gss	glutathione synthetase	-1.12245
ENSMUSG00000021453	Gadd45g	growth arrest and DNA-damage-inducible 45 gamma	-1.1181
ENSMUSG00000086029	Pax6os1	paired box 6 opposite strand 1	-1.11235
ENSMUSG00000060675	Plaat3	phospholipase A and acyltransferase 3	-1.10753
ENSMUSG00000078695	Cisd3	CDGSH iron sulfur domain 3	-1.10668
ENSMUSG00000029162	Khk	ketohexokinase	-1.10469
ENSMUSG00000044080	S100a1	S100 calcium binding protein A1	-1.10387
ENSMUSG00000117231	Gm41609	predicted gene, 41609	-1.0996
ENSMUSG00000029104	Htt	huntingtin	-1.09883
ENSMUSG00000078161	Erich3	glutamate rich 3	-1.09679
ENSMUSG00000064339	mt-Rnr2	mitochondrially encoded 16S rRNA	-1.09591
ENSMUSG00000049336	Tenm2	teneurin transmembrane protein 2	-1.09359
ENSMUSG00000000881	Dlg3	discs large MAGUK scaffold protein 3	-1.09293
ENSMUSG00000006378	Gcat	glycine C-acetyltransferase (2-amino-3-ketobutyrate-coenzyme A ligase)	-1.09292
ENSMUSG00000055296	Tmem245	transmembrane protein 245	-1.09022
ENSMUSG00000060923	Acyp2	acylphosphatase 2, muscle type	-1.08948
ENSMUSG00000052566	Hook2	hook microtubule tethering protein 2	-1.08831
ENSMUSG00000099843	Gm7160	predicted gene 7160	-1.08816
ENSMUSG00000046593	Tmem215	transmembrane protein 215	-1.08626
ENSMUSG00000036856	Wnt4	wingless-type MMTV integration site family, member 4	-1.08321
ENSMUSG00000000531	Tamalin	trafficking regulator and scaffold protein tamalin	-1.08183
ENSMUSG00000032875	Arhgef17	Rho guanine nucleotide exchange factor (GEF) 17	-1.0816
ENSMUSG00000035834	Polr3g	polymerase (RNA) III (DNA directed) polypeptide G	-1.08125
ENSMUSG00000029869	Ephb6	Eph receptor B6	-1.08072
ENSMUSG00000120043	ENSMUSG00000120043	novel transcript	-1.0799
ENSMUSG00000044164	Rnf182	ring finger protein 182	-1.07883
ENSMUSG00000005267	Zfp287	zinc finger protein 287	-1.07876
ENSMUSG00000096449	Gm4076	predicted gene 4076	-1.07802
ENSMUSG00000053617	Sh3pxd2a	SH3 and PX domains 2A	-1.07621
ENSMUSG00000059834	Sclt1	sodium channel and clathrin linker 1	-1.07558
ENSMUSG00000021194	Chga	chromogranin A	-1.07415
ENSMUSG00000024892	Pcx	pyruvate carboxylase	-1.07021
ENSMUSG00000002808	Epdr1	ependymin related protein 1 (zebrafish)	-1.06707
ENSMUSG00000040860	Crocc	ciliary rootlet coiled-coil, rootletin	-1.06671
ENSMUSG00000035759	Bbs10	Bardet-Biedl syndrome 10 (human)	-1.06496
ENSMUSG00000036298	Slc2a13	solute carrier family 2 (facilitated glucose transporter), member 13	-1.06386
ENSMUSG00000024180	Pgap6	post-glycosylphosphatidylinositol attachment to proteins 6	-1.06339
ENSMUSG00000029480	Dhx37	DEAH (Asp-Glu-Ala-His) box polypeptide 37	-1.05967
ENSMUSG00000024376	Epb41l4a	erythrocyte membrane protein band 4.1 like 4a	-1.0593
ENSMUSG00000003279	Dlgap1	DLG associated protein 1	-1.0587
ENSMUSG00000058488	Kl	klotho	-1.05819
ENSMUSG00000022853	Ehhadh	enoyl-Coenzyme A, hydratase/3-hydroxyacyl Coenzyme A dehydrogenase	-1.05609
ENSMUSG00000032507	Fbxl2	F-box and leucine-rich repeat protein 2	-1.05575
ENSMUSG00000054708	Ankrd24	ankyrin repeat domain 24	-1.0536
ENSMUSG00000121081	ENSMUSG00000121081	novel transcript, antisense to Myo5aand KO:Myo5a	-1.05354
ENSMUSG00000042660	Wdr55	WD repeat domain 55	-1.05342
ENSMUSG00000026312	Cdh7	cadherin 7, type 2	-1.04767
ENSMUSG00000021913	Ogdhl	oxoglutarate dehydrogenase-like	-1.04733
ENSMUSG00000024121	Atp6v0c	ATPase, H+ transporting, lysosomal V0 subunit C	-1.04617
ENSMUSG00000044533	Rps2	ribosomal protein S2	-1.04548
ENSMUSG00000052605	Isoc2b	isochorismatase domain containing 2b	-1.04394
ENSMUSG00000029123	Stk32b	serine/threonine kinase 32B	-1.04008
ENSMUSG00000025909	Sntg1	syntrophin, gamma 1	-1.03731
ENSMUSG00000021947	Cryl1	crystallin, lambda 1	-1.0373
ENSMUSG00000034007	Scaper	S phase cyclin A-associated protein in the ER	-1.03629
ENSMUSG00000106139	Gm30648	predicted gene, 30648	-1.03347
ENSMUSG00000024208	Uqcc2	ubiquinol-cytochrome c reductase complex assembly factor 2	-1.0333
ENSMUSG00000060063	Alox5ap	arachidonate 5-lipoxygenase activating protein	-1.033
ENSMUSG00000038696	Mapkap1	mitogen-activated protein kinase associated protein 1	-1.03247
ENSMUSG00000053702	Nebl	nebulette	-1.03181
ENSMUSG00000035944	Ttc38	tetratricopeptide repeat domain 38	-1.03118
ENSMUSG00000029049	Morn1	MORN repeat containing 1	-1.02941
ENSMUSG00000033083	Tbc1d4	TBC1 domain family, member 4	-1.02672
ENSMUSG00000032020	Ubash3b	ubiquitin associated and SH3 domain containing, B	-1.02662
ENSMUSG00000036053	Fmnl2	formin-like 2	-1.02477
ENSMUSG00000041609	Bicdl1	BICD family like cargo adaptor 1	-1.02197
ENSMUSG00000044139	Prss53	protease, serine 53	-1.02037
ENSMUSG00000025316	Banp	BTG3 associated nuclear protein	-1.01844
ENSMUSG00000030541	Idh2	isocitrate dehydrogenase 2 (NADP+), mitochondrial	-1.01556
ENSMUSG00000039221	Rpl22l1	ribosomal protein L22 like 1	-1.0113
ENSMUSG00000073758	Sh3d21	SH3 domain containing 21	-1.01052
ENSMUSG00000086502	B130055M24Rik	RIKEN cDNA B130055M24 gene	-1.0098
ENSMUSG00000000416	Cttnbp2	cortactin binding protein 2	-1.00963
ENSMUSG00000078607	1810010H24Rik	RIKEN cDNA 1810010H24 gene	-1.00812
ENSMUSG00000018861	Fdxr	ferredoxin reductase	-1.00662
ENSMUSG00000016933	Plcg1	phospholipase C, gamma 1	-1.00602
ENSMUSG00000085227	6330418K02Rik	RIKEN cDNA 6330418K02 gene	-1.00297
ENSMUSG00000047022	Mipol1	mirror-image polydactyly 1	-1.00256
ENSMUSG00000062859	Tcp11	t-complex protein 11	1.00751
ENSMUSG00000031527	Eri1	exoribonuclease 1	1.0082
ENSMUSG00000079057	Cyp4v3	cytochrome P450, family 4, subfamily v, polypeptide 3	1.00843
ENSMUSG00000037379	Spon2	spondin 2, extracellular matrix protein	1.00918
ENSMUSG00000040322	Slc25a24	solute carrier family 25 (mitochondrial carrier, phosphate carrier), member 24	1.01052
ENSMUSG00000024640	Psat1	phosphoserine aminotransferase 1	1.01076
ENSMUSG00000025321	Itgb8	integrin beta 8	1.01168
ENSMUSG00000058571	Gpc6	glypican 6	1.01573
ENSMUSG00000024228	Nudt12	nudix (nucleoside diphosphate linked moiety X)-type motif 12	1.01717
ENSMUSG00000068551	Zfp467	zinc finger protein 467	1.01842
ENSMUSG00000042808	Gpx2	glutathione peroxidase 2	1.02186
ENSMUSG00000020882	Cacnb1	calcium channel, voltage-dependent, beta 1 subunit	1.02299
ENSMUSG00000001025	S100a6	S100 calcium binding protein A6 (calcyclin)	1.02304
ENSMUSG00000099681	1700052K11Rik	RIKEN cDNA 1700052K11 gene	1.02504
ENSMUSG00000002227	Mov10	Mov10 RISC complex RNA helicase	1.02538
ENSMUSG00000004961	Syt5	synaptotagmin V	1.02728
ENSMUSG00000087579	Hectd2os	Hectd2, opposite strand	1.02965
ENSMUSG00000067215	Usp51	ubiquitin specific protease 51	1.03188
ENSMUSG00000041219	Arhgap11a	Rho GTPase activating protein 11A	1.0323
ENSMUSG00000038530	Rgs4	regulator of G-protein signaling 4	1.03354
ENSMUSG00000031837	Necab2	N-terminal EF-hand calcium binding protein 2	1.03531
ENSMUSG00000118559	A930007A09Rik	RIKEN cDNA A930007A09 gene	1.03689
ENSMUSG00000029126	Nsg1	neuron specific gene family member 1	1.03748
ENSMUSG00000025572	Tmc6	transmembrane channel-like gene family 6	1.03943
ENSMUSG00000054752	Fsd1l	fibronectin type III and SPRY domain containing 1-like	1.04163
ENSMUSG00000015202	Cnksr3	Cnksr family member 3	1.04265
ENSMUSG00000039735	Fnbp1l	formin binding protein 1-like	1.04277
ENSMUSG00000019916	P4ha1	procollagen-proline, 2-oxoglutarate 4-dioxygenase (proline 4-hydroxylase), alpha 1 polypeptide	1.04313
ENSMUSG00000033419	Snap91	synaptosomal-associated protein 91	1.04859
ENSMUSG00000041654	Slc39a11	solute carrier family 39 (metal ion transporter), member 11	1.05061
ENSMUSG00000062760	Shisal1	shisa like 1	1.05115
ENSMUSG00000027993	Trim2	tripartite motif-containing 2	1.0515
ENSMUSG00000037016	Frem2	Fras1 related extracellular matrix protein 2	1.05155
ENSMUSG00000085587	Gm14493	predicted gene 14493	1.05427
ENSMUSG00000036944	Tmem71	transmembrane protein 71	1.05577
ENSMUSG00000004347	Pde1c	phosphodiesterase 1C	1.05604
ENSMUSG00000022360	Atad2	ATPase family, AAA domain containing 2	1.0566
ENSMUSG00000038732	Mboat1	membrane bound O-acyltransferase domain containing 1	1.05969
ENSMUSG00000004317	Clcn5	chloride channel, voltage-sensitive 5	1.06054
ENSMUSG00000041762	Gpr155	G protein-coupled receptor 155	1.06174
ENSMUSG00000063160	Numbl	numb-like	1.06291
ENSMUSG00000031637	Lrp2bp	Lrp2 binding protein	1.06295
ENSMUSG00000028382	Ptbp3	polypyrimidine tract binding protein 3	1.06443
ENSMUSG00000053907	Mat2a	methionine adenosyltransferase II, alpha	1.06759
ENSMUSG00000003378	Grik5	glutamate receptor, ionotropic, kainate 5 (gamma 2)	1.0686
ENSMUSG00000091659	Gm17099	predicted gene 17099	1.06958
ENSMUSG00000087109	4930474H06Rik	RIKEN cDNA 4930474H06 gene	1.07043
ENSMUSG00000001901	Kcnh6	potassium voltage-gated channel, subfamily H (eag-related), member 6	1.07263
ENSMUSG00000072437	Nanos1	nanos C2HC-type zinc finger 1	1.07403
ENSMUSG00000025225	Nfkb2	nuclear factor of kappa light polypeptide gene enhancer in B cells 2, p49/p100	1.07404
ENSMUSG00000029875	Ccdc184	coiled-coil domain containing 184	1.07433
ENSMUSG00000054939	Zfp174	zinc finger protein 174	1.07502
ENSMUSG00000028134	Ptbp2	polypyrimidine tract binding protein 2	1.07801
ENSMUSG00000064225	Paqr9	progestin and adipoQ receptor family member IX	1.08242
ENSMUSG00000032852	Rspo4	R-spondin 4	1.08404
ENSMUSG00000020038	Cry1	cryptochrome 1 (photolyase-like)	1.08519
ENSMUSG00000032258	Lca5	Leber congenital amaurosis 5 (human)	1.08565
ENSMUSG00000060678	H4c3	H4 clustered histone 3	1.0876
ENSMUSG00000070427	Il18bp	interleukin 18 binding protein	1.09167
ENSMUSG00000042613	Pbxip1	pre B cell leukemia transcription factor interacting protein 1	1.0919
ENSMUSG00000109029	Gm44717	predicted gene 44717	1.09279
ENSMUSG00000055633	Zfp580	zinc finger protein 580	1.09356
ENSMUSG00000032091	Tmprss4	transmembrane protease, serine 4	1.09453
ENSMUSG00000034656	Cacna1a	calcium channel, voltage-dependent, P/Q type, alpha 1A subunit	1.09555
ENSMUSG00000019913	Sim1	single-minded family bHLH transcription factor 1	1.09831
ENSMUSG00000041216	Clvs1	clavesin 1	1.09993
ENSMUSG00000019923	Zwint	ZW10 interactor	1.10251
ENSMUSG00000039611	Pgap4	post-GPI attachment to proteins GalNAc transferase 4	1.10349
ENSMUSG00000020311	Erlec1	endoplasmic reticulum lectin 1	1.10459
ENSMUSG00000102748	Pcdhgb2	protocadherin gamma subfamily B, 2	1.10552
ENSMUSG00000081758	Gm11460	predicted gene 11460	1.10818
ENSMUSG00000023393	Slc17a9	solute carrier family 17, member 9	1.10913
ENSMUSG00000042286	Stab1	stabilin 1	1.11228
ENSMUSG00000035596	Mboat7	membrane bound O-acyltransferase domain containing 7	1.11278
ENSMUSG00000025262	Fam120c	family with sequence similarity 120, member C	1.11525
ENSMUSG00000069920	B3gnt9	UDP-GlcNAc:betaGal beta-1,3-N-acetylglucosaminyltransferase 9	1.11593
ENSMUSG00000111375	Btbd8	BTB (POZ) domain containing 8	1.11762
ENSMUSG00000031112	Stk26	serine/threonine kinase 26	1.11783
ENSMUSG00000112470	5330439M10Rik	RIKEN cDNA 5330439M10 gene	1.11827
ENSMUSG00000026335	Pam	peptidylglycine alpha-amidating monooxygenase	1.1184
ENSMUSG00000008035	Mid1ip1	Mid1 interacting protein 1 (gastrulation specific G12-like (zebrafish))	1.11864
ENSMUSG00000087479	Gm16835	predicted gene, 16835	1.12288
ENSMUSG00000045349	Sh2d5	SH2 domain containing 5	1.12337
ENSMUSG00000001988	Npas1	neuronal PAS domain protein 1	1.12757
ENSMUSG00000043535	Setx	senataxin	1.13127
ENSMUSG00000027249	F2	coagulation factor II	1.13143
ENSMUSG00000023266	Frs3	fibroblast growth factor receptor substrate 3	1.13556
ENSMUSG00000074671	Tspyl3	TSPY-like 3	1.13645
ENSMUSG00000043091	Tuba1c	tubulin, alpha 1C	1.13856
ENSMUSG00000107383	Gm4366	predicted gene 4366	1.1397
ENSMUSG00000034990	Otoa	otoancorin	1.14123
ENSMUSG00000025006	Sorbs1	sorbin and SH3 domain containing 1	1.14146
ENSMUSG00000023017	Asic1	acid-sensing (proton-gated) ion channel 1	1.14316
ENSMUSG00000052595	A1cf	APOBEC1 complementation factor	1.14558
ENSMUSG00000029016	Clcn6	chloride channel, voltage-sensitive 6	1.14632
ENSMUSG00000005973	Rcn1	reticulocalbin 1	1.14705
ENSMUSG00000035638	Muc20	mucin 20	1.14753
ENSMUSG00000017314	Mpp2	membrane protein, palmitoylated 2 (MAGUK p55 subfamily member 2)	1.14974
ENSMUSG00000063275	Hacd1	3-hydroxyacyl-CoA dehydratase 1	1.15002
ENSMUSG00000084910	C630043F03Rik	RIKEN cDNA C630043F03 gene	1.15572
ENSMUSG00000025192	Entpd7	ectonucleoside triphosphate diphosphohydrolase 7	1.15613
ENSMUSG00000038112	AW551984	expressed sequence AW551984	1.15677
ENSMUSG00000032014	Oaf	out at first homolog	1.15792
ENSMUSG00000035620	Ric8b	RIC8 guanine nucleotide exchange factor B	1.15901
ENSMUSG00000030107	Usp18	ubiquitin specific peptidase 18	1.16134
ENSMUSG00000036854	Hspb6	heat shock protein, alpha-crystallin-related, B6	1.16263
ENSMUSG00000028041	Adam15	a disintegrin and metallopeptidase domain 15 (metargidin)	1.16379
ENSMUSG00000052584	Serp2	stress-associated endoplasmic reticulum protein family member 2	1.16683
ENSMUSG00000055022	Cntn1	contactin 1	1.16865
ENSMUSG00000022604	Cep97	centrosomal protein 97	1.17091
ENSMUSG00000040563	Plppr2	phospholipid phosphatase related 2	1.1743
ENSMUSG00000109251	E230032D23Rik	RIKEN cDNA E230032D23 gene	1.17588
ENSMUSG00000050549	Fam241a	family with sequence similarity 241, member A	1.17775
ENSMUSG00000029094	Afap1	actin filament associated protein 1	1.17962
ENSMUSG00000022758	P2rx6	purinergic receptor P2X, ligand-gated ion channel, 6	1.18146
ENSMUSG00000069662	Marcks	myristoylated alanine rich protein kinase C substrate	1.18266
ENSMUSG00000029999	Tgfa	transforming growth factor alpha	1.18628
ENSMUSG00000042638	Gucy2c	guanylate cyclase 2c	1.18755
ENSMUSG00000037110	Ralgapa2	Ral GTPase activating protein, alpha subunit 2 (catalytic)	1.1902
ENSMUSG00000037428	Vgf	VGF nerve growth factor inducible	1.19249
ENSMUSG00000074794	Arrdc3	arrestin domain containing 3	1.19544
ENSMUSG00000070056	Mfhas1	malignant fibrous histiocytoma amplified sequence 1	1.20058
ENSMUSG00000069305	H4c18	H4 clustered histone 18	1.20407
ENSMUSG00000045730	Adrb2	adrenergic receptor, beta 2	1.20481
ENSMUSG00000039357	Fut11	fucosyltransferase 11	1.20615
ENSMUSG00000043388	Tmem130	transmembrane protein 130	1.20953
ENSMUSG00000022843	Clcn2	chloride channel, voltage-sensitive 2	1.21313
ENSMUSG00000070047	Fat1	FAT atypical cadherin 1	1.2141
ENSMUSG00000044927	H1f10	H1.10 linker histone	1.21473
ENSMUSG00000107736	Gm44148	predicted gene, 44148	1.21645
ENSMUSG00000006576	Slc4a3	solute carrier family 4 (anion exchanger), member 3	1.21696
ENSMUSG00000024462	Gabbr1	gamma-aminobutyric acid (GABA) B receptor, 1	1.21803
ENSMUSG00000042515	Pwwp3b	PWWP domain containing 3B	1.21986
ENSMUSG00000105987	AI506816	expressed sequence AI506816	1.22089
ENSMUSG00000049313	Sorl1	sortilin-related receptor, LDLR class A repeats-containing	1.22221
ENSMUSG00000057455	Rit2	Ras-like without CAAX 2	1.22674
ENSMUSG00000029860	Zyx	zyxin	1.22721
ENSMUSG00000012350	Ehf	ets homologous factor	1.22871
ENSMUSG00000023036	Pcdhgc4	protocadherin gamma subfamily C, 4	1.23036
ENSMUSG00000091971	Hspa1a	heat shock protein 1A	1.23055
ENSMUSG00000002012	Pnck	pregnancy upregulated non-ubiquitously expressed CaM kinase	1.23418
ENSMUSG00000086128	St8sia3os	ST8 alpha-N-acetyl-neuraminide alpha-2,8-sialyltransferase 3, opposite strand	1.23631
ENSMUSG00000054517	Trim65	tripartite motif-containing 65	1.23906
ENSMUSG00000037465	Klf10	Kruppel-like factor 10	1.23932
ENSMUSG00000006398	Cdc20	cell division cycle 20	1.23955
ENSMUSG00000003863	Ppfia3	protein tyrosine phosphatase, receptor type, f polypeptide (PTPRF), interacting protein (liprin), alpha 3	1.23977
ENSMUSG00000032577	Mapkapk3	mitogen-activated protein kinase-activated protein kinase 3	1.24227
ENSMUSG00000063919	Srrm4	serine/arginine repetitive matrix 4	1.24235
ENSMUSG00000114165	Gm47513	predicted gene, 47513	1.24435
ENSMUSG00000029033	Acap3	ArfGAP with coiled-coil, ankyrin repeat and PH domains 3	1.24572
ENSMUSG00000053560	Ier2	immediate early response 2	1.24986
ENSMUSG00000086360	Gm16214	predicted gene 16214	1.25052
ENSMUSG00000073411	H2-D1	histocompatibility 2, D region locus 1	1.25438
ENSMUSG00000097004	4731419I09Rik	RIKEN cDNA 4731419I09 gene	1.2576
ENSMUSG00000022636	Alcam	activated leukocyte cell adhesion molecule	1.26017
ENSMUSG00000025464	Paox	polyamine oxidase (exo-N4-amino)	1.26079
ENSMUSG00000000394	Gcg	glucagon	1.26116
ENSMUSG00000026311	Asb1	ankyrin repeat and SOCS box-containing 1	1.26155
ENSMUSG00000070858	Gm1673	predicted gene 1673	1.26225
ENSMUSG00000022475	Hdac7	histone deacetylase 7	1.26242
ENSMUSG00000032548	Slco2a1	solute carrier organic anion transporter family, member 2a1	1.26384
ENSMUSG00000023952	Gtpbp2	GTP binding protein 2	1.2642
ENSMUSG00000056812	St8sia3	ST8 alpha-N-acetyl-neuraminide alpha-2,8-sialyltransferase 3	1.26589
ENSMUSG00000090100	Ttbk2	tau tubulin kinase 2	1.26629
ENSMUSG00000052613	Pcdh15	protocadherin 15	1.27073
ENSMUSG00000090206	Tepp	testis, prostate and placenta expressed	1.27233
ENSMUSG00000092609	Gm20481	predicted gene 20481	1.27488
ENSMUSG00000024827	Gldc	glycine decarboxylase	1.27781
ENSMUSG00000025289	Prdx4	peroxiredoxin 4	1.28127
ENSMUSG00000053025	Sv2b	synaptic vesicle glycoprotein 2 b	1.28168
ENSMUSG00000020961	Ston2	stonin 2	1.28209
ENSMUSG00000024241	Sos1	SOS Ras/Rac guanine nucleotide exchange factor 1	1.28604
ENSMUSG00000031381	Piga	phosphatidylinositol glycan anchor biosynthesis, class A	1.28812
ENSMUSG00000051855	Mest	mesoderm specific transcript	1.28827
ENSMUSG00000047945	Marcksl1	MARCKS-like 1	1.2895
ENSMUSG00000029189	Sel1l3	sel-1 suppressor of lin-12-like 3 (C. elegans)	1.29102
ENSMUSG00000103332	Pcdhga2	protocadherin gamma subfamily A, 2	1.29292
ENSMUSG00000024070	Prkd3	protein kinase D3	1.29524
ENSMUSG00000043639	Rbm20	RNA binding motif protein 20	1.29575
ENSMUSG00000027522	Stx16	syntaxin 16	1.29592
ENSMUSG00000036890	Gtdc1	glycosyltransferase-like domain containing 1	1.29621
ENSMUSG00000033434	Gtpbp6	GTP binding protein 6 (putative)	1.29701
ENSMUSG00000020704	Asic2	acid-sensing (proton-gated) ion channel 2	1.29882
ENSMUSG00000109111	6530437J22Rik	RIKEN cDNA 6530437J22 gene	1.30054
ENSMUSG00000039000	Ube3c	ubiquitin protein ligase E3C	1.30056
ENSMUSG00000036098	Myrf	myelin regulatory factor	1.31307
ENSMUSG00000026094	Stk17b	serine/threonine kinase 17b (apoptosis-inducing)	1.31635
ENSMUSG00000042228	Lyn	LYN proto-oncogene, Src family tyrosine kinase	1.31715
ENSMUSG00000019942	Cdk1	cyclin-dependent kinase 1	1.31824
ENSMUSG00000008153	Clstn3	calsyntenin 3	1.32107
ENSMUSG00000090877	Hspa1b	heat shock protein 1B	1.32469
ENSMUSG00000022602	Arc	activity regulated cytoskeletal-associated protein	1.32762
ENSMUSG00000097083	D930019O06Rik	RIKEN cDNA D930019O06	1.3292
ENSMUSG00000099583	H3c4	H3 clustered histone 4	1.3307
ENSMUSG00000039607	Rbms3	RNA binding motif, single stranded interacting protein	1.33307
ENSMUSG00000037259	Dzank1	double zinc ribbon and ankyrin repeat domains 1	1.33705
ENSMUSG00000029757	Dync1i1	dynein cytoplasmic 1 intermediate chain 1	1.34175
ENSMUSG00000054477	Kcnn2	potassium intermediate/small conductance calcium-activated channel, subfamily N, member 2	1.34178
ENSMUSG00000031150	Ccdc120	coiled-coil domain containing 120	1.34318
ENSMUSG00000080715	Gm5406	predicted gene 5406	1.34605
ENSMUSG00000041180	Hectd2	HECT domain E3 ubiquitin protein ligase 2	1.3468
ENSMUSG00000019831	Wasf1	WASP family, member 1	1.34914
ENSMUSG00000032265	Tent5a	terminal nucleotidyltransferase 5A	1.35091
ENSMUSG00000030428	Ttyh1	tweety family member 1	1.35278
ENSMUSG00000016382	Pls3	plastin 3 (T-isoform)	1.36026
ENSMUSG00000085042	Abhd11os	abhydrolase domain containing 11, opposite strand	1.36052
ENSMUSG00000000078	Klf6	Kruppel-like factor 6	1.36147
ENSMUSG00000120443	ENSMUSG00000120443	novel transcript	1.3728
ENSMUSG00000022099	Dmtn	dematin actin binding protein	1.37545
ENSMUSG00000043067	Dpy19l1	dpy-19-like 1 (C. elegans)	1.37752
ENSMUSG00000061808	Ttr	transthyretin	1.38597
ENSMUSG00000063018	2010204K13Rik	RIKEN cDNA 2010204K13 gene	1.39353
ENSMUSG00000068735	Trp53i11	transformation related protein 53 inducible protein 11	1.39397
ENSMUSG00000039115	Itga9	integrin alpha 9	1.395
ENSMUSG00000039384	Dusp10	dual specificity phosphatase 10	1.39597
ENSMUSG00000079434	Neu2	neuraminidase 2	1.39846
ENSMUSG00000032220	Myo1e	myosin IE	1.39908
ENSMUSG00000074782	4833422C13Rik	RIKEN cDNA 4833422C13 gene	1.40316
ENSMUSG00000000214	Th	tyrosine hydroxylase	1.40371
ENSMUSG00000028780	Sema3c	sema domain, immunoglobulin domain (Ig), short basic domain, secreted, (semaphorin) 3C	1.40454
ENSMUSG00000017311	Pyy	peptide YY	1.40788
ENSMUSG00000038522	Mfsd4b1	major facilitator superfamily domain containing 4B1	1.4109
ENSMUSG00000027134	Lpcat4	lysophosphatidylcholine acyltransferase 4	1.41098
ENSMUSG00000104676	Gm42777	predicted gene 42777	1.41482
ENSMUSG00000039835	Nhsl1	NHS-like 1	1.42182
ENSMUSG00000020922	Lsm12	LSM12 homolog	1.42191
ENSMUSG00000036459	Wtip	WT1 interacting protein	1.42886
ENSMUSG00000031284	Pak3	p21 (RAC1) activated kinase 3	1.42955
ENSMUSG00000097330	Gm26672	predicted gene, 26672	1.44418
ENSMUSG00000018217	Pmp22	peripheral myelin protein 22	1.44674
ENSMUSG00000040964	Arhgef10l	Rho guanine nucleotide exchange factor (GEF) 10-like	1.45812
ENSMUSG00000086527	Gm15856	predicted gene 15856	1.45831
ENSMUSG00000041245	Wnk3	WNK lysine deficient protein kinase 3	1.45894
ENSMUSG00000022861	Dgkg	diacylglycerol kinase, gamma	1.45957
ENSMUSG00000022270	Retreg1	reticulophagy regulator 1	1.46126
ENSMUSG00000026121	Sema4c	sema domain, immunoglobulin domain (Ig), transmembrane domain (TM) and short cytoplasmic domain, (semaphorin) 4C	1.46771
ENSMUSG00000087366	Junos	jun proto-oncogene, opposite strand	1.46942
ENSMUSG00000039831	Arhgap29	Rho GTPase activating protein 29	1.4741
ENSMUSG00000120992	ENSMUSG00000120992	novel transcript	1.477
ENSMUSG00000078349	AW011738	expressed sequence AW011738	1.48253
ENSMUSG00000028832	Stmn1	stathmin 1	1.48439
ENSMUSG00000053062	Jam2	junction adhesion molecule 2	1.48552
ENSMUSG00000052684	Jun	jun proto-oncogene	1.48804
ENSMUSG00000044461	Shisa2	shisa family member 2	1.49175
ENSMUSG00000024766	Lipo3	lipase, member O3	1.49184
ENSMUSG00000067786	Nnat	neuronatin	1.4946
ENSMUSG00000026090	Cracdl	capping protein inhibiting regulator of actin like	1.49575
ENSMUSG00000054679	Srsf12	serine and arginine-rich splicing factor 12	1.50009
ENSMUSG00000028005	Gucy1b1	guanylate cyclase 1, soluble, beta 1	1.50054
ENSMUSG00000038132	Rbm24	RNA binding motif protein 24	1.50325
ENSMUSG00000091764	Zfp964	zinc finger protein 964	1.50658
ENSMUSG00000036334	Igsf10	immunoglobulin superfamily, member 10	1.50848
ENSMUSG00000039982	Dtx4	deltex 4, E3 ubiquitin ligase	1.50888
ENSMUSG00000007783	Cpt1c	carnitine palmitoyltransferase 1c	1.51004
ENSMUSG00000068923	Syt11	synaptotagmin XI	1.51005
ENSMUSG00000037887	Dusp8	dual specificity phosphatase 8	1.51458
ENSMUSG00000023224	Serping1	serine (or cysteine) peptidase inhibitor, clade G, member 1	1.51561
ENSMUSG00000009731	Kcnd1	potassium voltage-gated channel, Shal-related family, member 1	1.51636
ENSMUSG00000103009	Gm56350	predicted gene, 56350	1.51711
ENSMUSG00000001403	Ube2c	ubiquitin-conjugating enzyme E2C	1.5181
ENSMUSG00000025269	Apex2	apurinic/apyrimidinic endonuclease 2	1.51827
ENSMUSG00000017144	Rnd3	Rho family GTPase 3	1.52167
ENSMUSG00000030672	Mylpf	myosin light chain, phosphorylatable, fast skeletal muscle	1.52205
ENSMUSG00000022780	Meltf	melanotransferrin	1.52259
ENSMUSG00000028626	Col9a2	collagen, type IX, alpha 2	1.52838
ENSMUSG00000048537	Phldb1	pleckstrin homology like domain, family B, member 1	1.52962
ENSMUSG00000036198	Arhgap36	Rho GTPase activating protein 36	1.53213
ENSMUSG00000027339	Rassf2	Ras association (RalGDS/AF-6) domain family member 2	1.53276
ENSMUSG00000074743	Thbd	thrombomodulin	1.53297
ENSMUSG00000053113	Socs3	suppressor of cytokine signaling 3	1.53555
ENSMUSG00000085760	Gm14302	predicted gene 14302	1.53719
ENSMUSG00000002458	Rgs19	regulator of G-protein signaling 19	1.54683
ENSMUSG00000037541	Shank2	SH3 and multiple ankyrin repeat domains 2	1.55173
ENSMUSG00000024085	Man2a1	mannosidase 2, alpha 1	1.55282
ENSMUSG00000030137	Tuba8	tubulin, alpha 8	1.5635
ENSMUSG00000025582	Nptx1	neuronal pentraxin 1	1.56929
ENSMUSG00000001225	Slc26a3	solute carrier family 26, member 3	1.56936
ENSMUSG00002075463	Gm56190	predicted gene, 56190	1.57287
ENSMUSG00000029095	Ablim2	actin-binding LIM protein 2	1.5766
ENSMUSG00000035681	Kcnc2	potassium voltage gated channel, Shaw-related subfamily, member 2	1.57901
ENSMUSG00000024114	Prss41	protease, serine 41	1.58374
ENSMUSG00000037820	Tgm2	transglutaminase 2, C polypeptide	1.59278
ENSMUSG00000014592	Camta1	calmodulin binding transcription activator 1	1.5936
ENSMUSG00000002799	Jag2	jagged 2	1.59378
ENSMUSG00000025355	Mmp19	matrix metallopeptidase 19	1.59505
ENSMUSG00000044847	Lsm11	U7 snRNP-specific Sm-like protein LSM11	1.59682
ENSMUSG00000028494	Plin2	perilipin 2	1.59735
ENSMUSG00000023272	Creld2	cysteine-rich with EGF-like domains 2	1.60433
ENSMUSG00000044528	Tram1l1	translocation associated membrane protein 1-like 1	1.60538
ENSMUSG00000007021	Syngr3	synaptogyrin 3	1.60628
ENSMUSG00000074916	Chst14	carbohydrate sulfotransferase 14	1.60728
ENSMUSG00000022489	Pde1b	phosphodiesterase 1B, Ca2+-calmodulin dependent	1.60793
ENSMUSG00000015217	Hmgb3	high mobility group box 3	1.6104
ENSMUSG00000004035	Gstm7	glutathione S-transferase, mu 7	1.61878
ENSMUSG00000021613	Hapln1	hyaluronan and proteoglycan link protein 1	1.62351
ENSMUSG00000031328	Flna	filamin, alpha	1.62987
ENSMUSG00000073856	Iqck	IQ motif containing K	1.63155
ENSMUSG00000028541	B4galt2	UDP-Gal:betaGlcNAc beta 1,4- galactosyltransferase, polypeptide 2	1.63326
ENSMUSG00000038252	Ncapd2	non-SMC condensin I complex, subunit D2	1.63387
ENSMUSG00000002233	Rhoc	ras homolog family member C	1.6353
ENSMUSG00000053182	Cd200l1	CD200 molecule like 1	1.64284
ENSMUSG00000038418	Egr1	early growth response 1	1.65461
ENSMUSG00000000154	Slc22a18	solute carrier family 22 (organic cation transporter), member 18	1.65618
ENSMUSG00000103749	Pcdhgb5	protocadherin gamma subfamily B, 5	1.65803
ENSMUSG00000027324	Rpusd2	RNA pseudouridylate synthase domain containing 2	1.66581
ENSMUSG00000044807	Zfp354c	zinc finger protein 354C	1.6679
ENSMUSG00000086067	Gm16183	predicted gene 16183	1.67057
ENSMUSG00000050777	Tmem37	transmembrane protein 37	1.67497
ENSMUSG00000055782	Abcd2	ATP-binding cassette, sub-family D (ALD), member 2	1.67504
ENSMUSG00000030342	Cd9	CD9 antigen	1.68078
ENSMUSG00000026655	Fam107b	family with sequence similarity 107, member B	1.68136
ENSMUSG00000037474	Dtl	denticleless E3 ubiquitin protein ligase	1.68847
ENSMUSG00000041431	Ccnb1	cyclin B1	1.69145
ENSMUSG00000027469	Tpx2	TPX2, microtubule-associated	1.69204
ENSMUSG00000112627	4933412E12Rik	RIKEN cDNA 4933412E12 gene	1.69285
ENSMUSG00000100009	Gm7967	predicted gene 7967	1.69833
ENSMUSG00000028524	Sgip1	SH3-domain GRB2-like (endophilin) interacting protein 1	1.69996
ENSMUSG00000064246	Chil1	chitinase-like 1	1.70244
ENSMUSG00000038007	Acer2	alkaline ceramidase 2	1.70317
ENSMUSG00000022505	Emp2	epithelial membrane protein 2	1.70357
ENSMUSG00000033981	Gria2	glutamate receptor, ionotropic, AMPA2 (alpha 2)	1.70551
ENSMUSG00000047139	Cd24a	CD24a antigen	1.70568
ENSMUSG00000037544	Dlgap5	DLG associated protein 5	1.70588
ENSMUSG00000036699	Zcchc12	zinc finger, CCHC domain containing 12	1.70873
ENSMUSG00000031538	Plat	plasminogen activator, tissue	1.71502
ENSMUSG00000027330	Cdc25b	cell division cycle 25B	1.71835
ENSMUSG00000025375	Aatk	apoptosis-associated tyrosine kinase	1.72397
ENSMUSG00000025069	Gsto2	glutathione S-transferase omega 2	1.72434
ENSMUSG00000035277	Arx	aristaless related homeobox	1.72635
ENSMUSG00000027524	Edn3	endothelin 3	1.73292
ENSMUSG00000037106	Fer1l6	fer-1-like 6 (C. elegans)	1.74009
ENSMUSG00000071573	Rnls	renalase, FAD-dependent amine oxidase	1.75422
ENSMUSG00000025481	Urah	urate (5-hydroxyiso-) hydrolase	1.75498
ENSMUSG00000029223	Uchl1	ubiquitin carboxy-terminal hydrolase L1	1.75534
ENSMUSG00000025402	Nab2	Ngfi-A binding protein 2	1.76051
ENSMUSG00000024190	Dusp1	dual specificity phosphatase 1	1.76221
ENSMUSG00000046341	Gm11223	predicted gene 11223	1.76261
ENSMUSG00000027965	Olfm3	olfactomedin 3	1.76262
ENSMUSG00000079262	Slco1a6	solute carrier organic anion transporter family, member 1a6	1.76609
ENSMUSG00000004383	Large1	LARGE xylosyl- and glucuronyltransferase 1	1.77449
ENSMUSG00000040703	Cyp2s1	cytochrome P450, family 2, subfamily s, polypeptide 1	1.77471
ENSMUSG00000104234	5330439B14Rik	RIKEN cDNA 5330439B14 gene	1.78336
ENSMUSG00000089647	Gm2245	predicted gene 2245	1.78615
ENSMUSG00000092283	Gm20412	predicted gene 20412	1.79559
ENSMUSG00000087601	Uchl1os	ubiquitin carboxy-terminal hydrolase L1, opposite strand	1.79774
ENSMUSG00000044312	Neurog3	neurogenin 3	1.80683
ENSMUSG00000024063	Lbh	limb-bud and heart	1.80885
ENSMUSG00000070639	Lrrc8b	leucine rich repeat containing 8 family, member B	1.8109
ENSMUSG00000023905	Tnfrsf12a	tumor necrosis factor receptor superfamily, member 12a	1.81283
ENSMUSG00000001986	Gria3	glutamate receptor, ionotropic, AMPA3 (alpha 3)	1.81557
ENSMUSG00000086421	Gm14091	predicted gene 14091	1.81827
ENSMUSG00000027276	Jag1	jagged 1	1.81961
ENSMUSG00000029359	Tesc	tescalcin	1.8224
ENSMUSG00000049349	Gm5105	predicted gene 5105	1.82324
ENSMUSG00000064247	Plcxd1	phosphatidylinositol-specific phospholipase C, X domain containing 1	1.82416
ENSMUSG00000098557	Kctd12	potassium channel tetramerisation domain containing 12	1.82536
ENSMUSG00000031066	Usp11	ubiquitin specific peptidase 11	1.82606
ENSMUSG00000066026	Dhrs3	dehydrogenase/reductase (SDR family) member 3	1.8283
ENSMUSG00000039145	Camk1d	calcium/calmodulin-dependent protein kinase ID	1.85718
ENSMUSG00000005087	Cd44	CD44 antigen	1.85828
ENSMUSG00000027331	Knstrn	kinetochore-localized astrin/SPAG5 binding	1.85864
ENSMUSG00000042532	Golga7b	golgi autoantigen, golgin subfamily a, 7B	1.86203
ENSMUSG00000026921	Egfl7	EGF-like domain 7	1.86311
ENSMUSG00000044786	Zfp36	zinc finger protein 36	1.86852
ENSMUSG00000087341	0610040F04Rik	RIKEN cDNA 0610040F04 gene	1.87006
ENSMUSG00000019960	Dusp6	dual specificity phosphatase 6	1.87742
ENSMUSG00000120362	ENSMUSG00000120362	novel transcript	1.88202
ENSMUSG00000025089	Gfra1	glial cell line derived neurotrophic factor family receptor alpha 1	1.88413
ENSMUSG00000072966	Gprasp2	G protein-coupled receptor associated sorting protein 2	1.89581
ENSMUSG00000033287	Kctd17	potassium channel tetramerisation domain containing 17	1.89599
ENSMUSG00000121017	ENSMUSG00000121017	novel transcript	1.90354
ENSMUSG00000022208	Jph4	junctophilin 4	1.90437
ENSMUSG00000030306	Tmtc1	transmembrane and tetratricopeptide repeat containing 1	1.90544
ENSMUSG00000024873	Cnih2	cornichon family AMPA receptor auxiliary protein 2	1.90547
ENSMUSG00000102742	Pcdhga11	protocadherin gamma subfamily A, 11	1.92506
ENSMUSG00000070436	Serpinh1	serine (or cysteine) peptidase inhibitor, clade H, member 1	1.93046
ENSMUSG00000025268	Maged2	MAGE family member D2	1.93449
ENSMUSG00000121264	ENSMUSG00000121264	novel transcript, antisense to KO:Cd44and Cd44	1.93594
ENSMUSG00000086537	Gnasas1	GNAS antisense RNA 1	1.93785
ENSMUSG00000000126	Wnt9a	wingless-type MMTV integration site family, member 9A	1.93898
ENSMUSG00000034528	Hsd17b13	hydroxysteroid (17-beta) dehydrogenase 13	1.94245
ENSMUSG00000048776	Pthlh	parathyroid hormone-like peptide	1.947
ENSMUSG00000035403	Crb2	crumbs family member 2	1.94887
ENSMUSG00000092220	Gm20528	predicted gene 20528	1.95207
ENSMUSG00000020865	Abcc3	ATP-binding cassette, sub-family C (CFTR/MRP), member 3	1.95296
ENSMUSG00000020227	Irak3	interleukin-1 receptor-associated kinase 3	1.96183
ENSMUSG00000038347	Tcte2	t-complex-associated testis expressed 2	1.96913
ENSMUSG00000023906	Cldn6	claudin 6	1.97191
ENSMUSG00000109513	Gm44928	predicted gene 44928	1.97876
ENSMUSG00000001473	Tubb6	tubulin, beta 6 class V	1.98512
ENSMUSG00000047963	Stbd1	starch binding domain 1	1.99008
ENSMUSG00000057182	Scn3a	sodium channel, voltage-gated, type III, alpha	1.99158
ENSMUSG00000067547	Gm7666	predicted pseudogene 7666	1.99602
ENSMUSG00000064125	Prr36	proline rich 36	2.00616
ENSMUSG00000001670	Tat	tyrosine aminotransferase	2.00947
ENSMUSG00000047181	Samd14	sterile alpha motif domain containing 14	2.02177
ENSMUSG00000047502	Mroh7	maestro heat-like repeat family member 7	2.02749
ENSMUSG00000023232	Serinc2	serine incorporator 2	2.03104
ENSMUSG00000054200	Ffar4	free fatty acid receptor 4	2.03956
ENSMUSG00000039208	Metrnl	meteorin, glial cell differentiation regulator-like	2.04468
ENSMUSG00000026669	Mcm10	minichromosome maintenance 10 replication initiation factor	2.05616
ENSMUSG00000044349	Snhg11	small nucleolar RNA host gene 11	2.06056
ENSMUSG00000041889	Shisa4	shisa family member 4	2.06397
ENSMUSG00000018339	Gpx3	glutathione peroxidase 3	2.06935
ENSMUSG00000006356	Crip2	cysteine rich protein 2	2.07254
ENSMUSG00000086748	Gm13261	predicted gene 13261	2.07601
ENSMUSG00000029314	Gpat3	glycerol-3-phosphate acyltransferase 3	2.07954
ENSMUSG00000056752	Dnah9	dynein, axonemal, heavy chain 9	2.08126
ENSMUSG00000038387	Rras	related RAS viral (r-ras) oncogene	2.08281
ENSMUSG00000006784	Odad4	outer dynein arm complex subunit 4	2.08754
ENSMUSG00000047631	Apof	apolipoprotein F	2.08764
ENSMUSG00000049235	Gm7324	predicted gene 7324	2.09399
ENSMUSG00000090024	Gm16350	predicted gene 16350	2.09929
ENSMUSG00000042371	Slc5a10	solute carrier family 5 (sodium/glucose cotransporter), member 10	2.09956
ENSMUSG00000052724	Gm9888	predicted gene 9888	2.09999
ENSMUSG00000063838	Cdc42ep5	CDC42 effector protein (Rho GTPase binding) 5	2.10234
ENSMUSG00000026622	Nek2	NIMA (never in mitosis gene a)-related expressed kinase 2	2.10461
ENSMUSG00000037706	Cd81	CD81 antigen	2.10575
ENSMUSG00000027699	Ect2	ect2 oncogene	2.10731
ENSMUSG00000062591	Tubb4a	tubulin, beta 4A class IVA	2.10743
ENSMUSG00000018849	Wwc1	WW, C2 and coiled-coil domain containing 1	2.11034
ENSMUSG00000104063	Pcdhgb7	protocadherin gamma subfamily B, 7	2.11403
ENSMUSG00000029669	Tspan12	tetraspanin 12	2.12138
ENSMUSG00000063975	Slco1a5	solute carrier organic anion transporter family, member 1a5	2.12174
ENSMUSG00000029135	Fosl2	fos-like antigen 2	2.12232
ENSMUSG00000047261	Gap43	growth associated protein 43	2.12381
ENSMUSG00000028072	Ntrk1	neurotrophic tyrosine kinase, receptor, type 1	2.12819
ENSMUSG00000055301	Adh7	alcohol dehydrogenase 7 (class IV), mu or sigma polypeptide	2.12948
ENSMUSG00000097789	Ctxnd1	cortexin domain containing 1	2.13097
ENSMUSG00000049916	2610318N02Rik	RIKEN cDNA 2610318N02 gene	2.13277
ENSMUSG00000085795	Zfp703	zinc finger protein 703	2.1358
ENSMUSG00000097974	Gm10605	predicted gene 10605	2.1372
ENSMUSG00000024736	Tmem132a	transmembrane protein 132A	2.1389
ENSMUSG00000059277	R74862	expressed sequence R74862	2.1395
ENSMUSG00000027765	P2ry1	purinergic receptor P2Y, G-protein coupled 1	2.14438
ENSMUSG00000006800	Sulf2	sulfatase 2	2.14572
ENSMUSG00000037509	Arhgef4	Rho guanine nucleotide exchange factor (GEF) 4	2.14606
ENSMUSG00000085731	Gm16229	predicted gene 16229	2.14881
ENSMUSG00000102564	Gm37035	predicted gene, 37035	2.15599
ENSMUSG00000002274	Metrn	meteorin, glial cell differentiation regulator	2.16173
ENSMUSG00000024986	Hhex	hematopoietically expressed homeobox	2.16234
ENSMUSG00000056679	Gpr173	G-protein coupled receptor 173	2.16495
ENSMUSG00000029563	Foxp2	forkhead box P2	2.1657
ENSMUSG00000117042	2700054A10Rik	RIKEN cDNA 2700054A10 gene	2.17334
ENSMUSG00000024665	Fads2	fatty acid desaturase 2	2.17708
ENSMUSG00000113211	4921525O09Rik	RIKEN cDNA 4921525O09 gene	2.17743
ENSMUSG00000046215	Rprml	reprimo-like	2.18039
ENSMUSG00000056895	H2bc27	H2B clustered histone 27	2.18547
ENSMUSG00000029195	Klb	klotho beta	2.18752
ENSMUSG00000038295	Atg9b	autophagy related 9B	2.19884
ENSMUSG00000087556	Gm15764	predicted gene 15764	2.21318
ENSMUSG00000022548	Apod	apolipoprotein D	2.21323
ENSMUSG00000045103	Dmd	dystrophin, muscular dystrophy	2.2142
ENSMUSG00000067377	Tspan6	tetraspanin 6	2.21454
ENSMUSG00000098284	A330093E20Rik	RIKEN cDNA A330093E20 gene	2.23243
ENSMUSG00000030605	Mfge8	milk fat globule EGF and factor V/VIII domain containing	2.24242
ENSMUSG00000075033	Nxpe3	neurexophilin and PC-esterase domain family, member 3	2.24725
ENSMUSG00000005583	Mef2c	myocyte enhancer factor 2C	2.249
ENSMUSG00000031387	Renbp	renin binding protein	2.2545
ENSMUSG00000035095	Fam167a	family with sequence similarity 167, member A	2.25596
ENSMUSG00000034472	Rasd2	RASD family, member 2	2.25718
ENSMUSG00000057143	Trim12c	tripartite motif-containing 12C	2.25956
ENSMUSG00000079679	Vwde	von Willebrand factor D and EGF domains	2.2632
ENSMUSG00000039960	Rhou	ras homolog family member U	2.26772
ENSMUSG00000002885	Adgre5	adhesion G protein-coupled receptor E5	2.27451
ENSMUSG00000024737	Slc15a3	solute carrier family 15, member 3	2.29113
ENSMUSG00000019987	Arg1	arginase, liver	2.29193
ENSMUSG00000036095	Dgkb	diacylglycerol kinase, beta	2.32646
ENSMUSG00000004631	Sgce	sarcoglycan, epsilon	2.33146
ENSMUSG00000075592	Nynrin	NYN domain and retroviral integrase containing	2.33391
ENSMUSG00000004366	Sst	somatostatin	2.33597
ENSMUSG00000021259	Cyp46a1	cytochrome P450, family 46, subfamily a, polypeptide 1	2.33957
ENSMUSG00000052852	Reep1	receptor accessory protein 1	2.3471
ENSMUSG00000045136	Tubb2b	tubulin, beta 2B class IIB	2.34858
ENSMUSG00000000120	Ngfr	nerve growth factor receptor (TNFR superfamily, member 16)	2.35228
ENSMUSG00000040016	Ptger3	prostaglandin E receptor 3 (subtype EP3)	2.35656
ENSMUSG00000114547	Gm3226	predicted gene 3226	2.36024
ENSMUSG00000028307	Aldob	aldolase B, fructose-bisphosphate	2.36091
ENSMUSG00000027848	Olfml3	olfactomedin-like 3	2.36976
ENSMUSG00000021620	Acot12	acyl-CoA thioesterase 12	2.37016
ENSMUSG00000018906	P4ha2	procollagen-proline, 2-oxoglutarate 4-dioxygenase (proline 4-hydroxylase), alpha II polypeptide	2.37328
ENSMUSG00000031224	Magee2	MAGE family member E2	2.37414
ENSMUSG00000064263	Platr26	pluripotency associated transcript 26	2.37689
ENSMUSG00000096257	Ccer2	coiled-coil glutamate-rich protein 2	2.38164
ENSMUSG00000058420	Syt17	synaptotagmin XVII	2.38455
ENSMUSG00000074457	S100a16	S100 calcium binding protein A16	2.38851
ENSMUSG00000023827	Agpat4	1-acylglycerol-3-phosphate O-acyltransferase 4 (lysophosphatidic acid acyltransferase, delta)	2.3898
ENSMUSG00000026825	Dnm1	dynamin 1	2.39252
ENSMUSG00000031919	Tmed6	transmembrane p24 trafficking protein 6	2.39299
ENSMUSG00000052912	Smarca5-ps	SWI/SNF related, matrix associated, actin depenent ragulator of chromatin, subfamily a, member 5, pseudogene	2.3937
ENSMUSG00000020684	Rasl10b	RAS-like, family 10, member B	2.39407
ENSMUSG00000109341	Gm30873	predicted gene, 30873	2.39528
ENSMUSG00000104002	Gm38336	predicted gene, 38336	2.40123
ENSMUSG00000046997	Spsb4	splA/ryanodine receptor domain and SOCS box containing 4	2.40504
ENSMUSG00000045009	Prrt3	proline-rich transmembrane protein 3	2.40984
ENSMUSG00000046733	Gprc5a	G protein-coupled receptor, family C, group 5, member A	2.41198
ENSMUSG00000026579	F5	coagulation factor V	2.42414
ENSMUSG00000004151	Etv1	ets variant 1	2.43029
ENSMUSG00000061576	Dpp6	dipeptidylpeptidase 6	2.43234
ENSMUSG00000026890	Lhx6	LIM homeobox protein 6	2.43352
ENSMUSG00000017165	Gast	gastrin	2.43451
ENSMUSG00000102840	Gm38037	predicted gene, 38037	2.43683
ENSMUSG00000031391	L1cam	L1 cell adhesion molecule	2.43937
ENSMUSG00000022176	Rem2	rad and gem related GTP binding protein 2	2.44307
ENSMUSG00000032609	Klhdc8b	kelch domain containing 8B	2.44845
ENSMUSG00000051111	Sv2c	synaptic vesicle glycoprotein 2c	2.45486
ENSMUSG00000120261	ENSMUSG00000120261	novel transcript	2.4587
ENSMUSG00000094500	Smim18	small integral membrane protein 18	2.46341
ENSMUSG00000062661	Ncs1	neuronal calcium sensor 1	2.46645
ENSMUSG00000038738	Shank1	SH3 and multiple ankyrin repeat domains 1	2.46896
ENSMUSG00000000753	Serpinf1	serine (or cysteine) peptidase inhibitor, clade F, member 1	2.47353
ENSMUSG00000026683	Nuf2	NUF2, NDC80 kinetochore complex component	2.47361
ENSMUSG00000096606	Tpbgl	trophoblast glycoprotein-like	2.47707
ENSMUSG00000035540	Gc	vitamin D binding protein	2.49231
ENSMUSG00000017466	Timp2	tissue inhibitor of metalloproteinase 2	2.49923
ENSMUSG00000015709	Arnt2	aryl hydrocarbon receptor nuclear translocator 2	2.5075
ENSMUSG00000117975	Itprip	inositol 1,4,5-triphosphate receptor interacting protein	2.51127
ENSMUSG00000024990	Rbp4	retinol binding protein 4, plasma	2.51383
ENSMUSG00000021749	Fam3d	FAM3 metabolism regulating signaling molecule D	2.51386
ENSMUSG00000121513	PTPRG	protein tyrosine phosphatase, receptor type, G	2.51691
ENSMUSG00000070337	Gpr179	G protein-coupled receptor 179	2.52234
ENSMUSG00000032261	Sh3bgrl2	SH3 domain binding glutamic acid-rich protein like 2	2.52285
ENSMUSG00000031574	Star	steroidogenic acute regulatory protein	2.52835
ENSMUSG00000029830	Svopl	SV2 related protein homolog (rat)-like	2.53249
ENSMUSG00000066553	Gm6969	predicted pseudogene 6969	2.53856
ENSMUSG00000046204	Pnma2	paraneoplastic antigen MA2	2.54278
ENSMUSG00000026989	Dapl1	death associated protein-like 1	2.54721
ENSMUSG00000024386	Proc	protein C	2.55089
ENSMUSG00000060591	Ifitm2	interferon induced transmembrane protein 2	2.56322
ENSMUSG00000041324	Inhba	inhibin beta-A	2.56579
ENSMUSG00000030946	Lhpp	phospholysine phosphohistidine inorganic pyrophosphate phosphatase	2.56837
ENSMUSG00000020723	Cacng4	calcium channel, voltage-dependent, gamma subunit 4	2.57032
ENSMUSG00000061740	Cyp2d22	cytochrome P450, family 2, subfamily d, polypeptide 22	2.5722
ENSMUSG00000037161	Mgarp	mitochondria localized glutamic acid rich protein	2.57378
ENSMUSG00000039109	F13a1	coagulation factor XIII, A1 subunit	2.57913
ENSMUSG00000037904	Ankrd9	ankyrin repeat domain 9	2.59389
ENSMUSG00000085081	Rptoros	regulatory associated protein of MTOR, complex 1, opposite strand	2.63523
ENSMUSG00000058126	Tpm3-rs7	tropomyosin 3, related sequence 7	2.64145
ENSMUSG00000056917	Sipa1	signal-induced proliferation associated gene 1	2.64363
ENSMUSG00000022577	Ly6h	lymphocyte antigen 6 complex, locus H	2.64826
ENSMUSG00000108657	Gm35611	predicted gene, 35611	2.65257
ENSMUSG00000078776	9530053A07Rik	RIKEN cDNA 9530053A07 gene	2.65453
ENSMUSG00000044674	Fzd1	frizzled class receptor 1	2.65532
ENSMUSG00000059401	Mamld1	mastermind-like domain containing 1	2.6608
ENSMUSG00000040339	Fam102b	family with sequence similarity 102, member B	2.67075
ENSMUSG00000036782	Klhl13	kelch-like 13	2.67502
ENSMUSG00000029516	Cit	citron	2.68044
ENSMUSG00000053214	Gm9899	predicted gene 9899	2.68234
ENSMUSG00000010086	Rnf112	ring finger protein 112	2.68384
ENSMUSG00000034957	Cebpa	CCAAT/enhancer binding protein (C/EBP), alpha	2.68415
ENSMUSG00000021032	Ngb	neuroglobin	2.69561
ENSMUSG00000063087	Gm10125	predicted gene 10125	2.69911
ENSMUSG00000031451	Gas6	growth arrest specific 6	2.70868
ENSMUSG00000072941	Sod3	superoxide dismutase 3, extracellular	2.71128
ENSMUSG00000015533	Itga2	integrin alpha 2	2.71299
ENSMUSG00000000567	Sox9	SRY (sex determining region Y)-box 9	2.72822
ENSMUSG00000021250	Fos	FBJ osteosarcoma oncogene	2.7283
ENSMUSG00000022357	Klhl38	kelch-like 38	2.73299
ENSMUSG00000080242	Atp6v0c-ps2	ATPase, H+ transporting, lysosomal V0 subunit C, pseudogene 2	2.73534
ENSMUSG00000035864	Syt1	synaptotagmin I	2.74166
ENSMUSG00000029093	Sorcs2	sortilin-related VPS10 domain containing receptor 2	2.75499
ENSMUSG00000089874	9230117E06Rik	RIKEN cDNA 9230117E06 gene	2.7615
ENSMUSG00000020592	Sdc1	syndecan 1	2.76991
ENSMUSG00000049265	Kcnk3	potassium channel, subfamily K, member 3	2.77376
ENSMUSG00000038457	Tmem255b	transmembrane protein 255B	2.77818
ENSMUSG00000051136	Ghsr	growth hormone secretagogue receptor	2.78225
ENSMUSG00000085541	Gm16010	predicted gene 16010	2.78307
ENSMUSG00000021373	Cap2	CAP, adenylate cyclase-associated protein, 2 (yeast)	2.79313
ENSMUSG00000094504	Foxl3	forkhead box L3	2.79696
ENSMUSG00000045763	Basp1	brain abundant, membrane attached signal protein 1	2.80404
ENSMUSG00000024197	Plin3	perilipin 3	2.80484
ENSMUSG00000047643	Gm5454	predicted gene 5454	2.81832
ENSMUSG00000096403	Rnps1-ps	RNA binding protein with serine rich domain 1, pseudogene	2.84735
ENSMUSG00000008090	Fgfrl1	fibroblast growth factor receptor-like 1	2.84841
ENSMUSG00000054162	Spock3	sparc/osteonectin, cwcv and kazal-like domains proteoglycan 3	2.84954
ENSMUSG00000000632	Sez6	seizure related gene 6	2.85545
ENSMUSG00000035506	Slc12a8	solute carrier family 12 (potassium/chloride transporters), member 8	2.85985
ENSMUSG00000030934	Oat	ornithine aminotransferase	2.86701
ENSMUSG00000006435	Neurl1a	neuralized E3 ubiquitin protein ligase 1A	2.87289
ENSMUSG00000042751	Nmnat2	nicotinamide nucleotide adenylyltransferase 2	2.91631
ENSMUSG00000010066	Cacna2d2	calcium channel, voltage-dependent, alpha 2/delta subunit 2	2.92417
ENSMUSG00000074607	Tox2	TOX high mobility group box family member 2	2.9291
ENSMUSG00000094445	1700015G11Rik	RIKEN cDNA 1700015G11 gene	2.94143
ENSMUSG00000026628	Atf3	activating transcription factor 3	2.94979
ENSMUSG00000082791	Gm4875	predicted gene 4875	2.95027
ENSMUSG00000044816	D630023F18Rik	RIKEN cDNA D630023F18 gene	2.96452
ENSMUSG00000016494	Cd34	CD34 antigen	2.97659
ENSMUSG00000105140	Gm43127	predicted gene 43127	2.9888
ENSMUSG00000022610	Mapk12	mitogen-activated protein kinase 12	2.99203
ENSMUSG00000003934	Efnb3	ephrin B3	2.99343
ENSMUSG00000050272	Dscam	DS cell adhesion molecule	2.99992
ENSMUSG00000078439	Smim24	small integral membrane protein 24	3.01726
ENSMUSG00000022658	Tagln3	transgelin 3	3.02807
ENSMUSG00000029361	Nos1	nitric oxide synthase 1, neuronal	3.06404
ENSMUSG00000049866	Arl4c	ADP-ribosylation factor-like 4C	3.07082
ENSMUSG00000048699	Krt90	keratin 90	3.07417
ENSMUSG00000053111	Fank1	fibronectin type 3 and ankyrin repeat domains 1	3.07504
ENSMUSG00000079436	Kcnj13	potassium inwardly-rectifying channel, subfamily J, member 13	3.085
ENSMUSG00000041548	Hspb8	heat shock protein 8	3.12015
ENSMUSG00000045991	Onecut2	one cut domain, family member 2	3.13522
ENSMUSG00000032076	Cadm1	cell adhesion molecule 1	3.13806
ENSMUSG00000038155	Gstp2	glutathione S-transferase, pi 2	3.13834
ENSMUSG00000072944	Nup62cl	nucleoporin 62 C-terminal like	3.1478
ENSMUSG00000025468	Caly	calcyon neuron-specific vesicular protein	3.15451
ENSMUSG00000026417	Pigr	polymeric immunoglobulin receptor	3.1742
ENSMUSG00000112143	Gm35721	predicted gene, 35721	3.175
ENSMUSG00000030226	Lmo3	LIM domain only 3	3.1933
ENSMUSG00000012017	Scarf2	scavenger receptor class F, member 2	3.19603
ENSMUSG00000031530	Dusp4	dual specificity phosphatase 4	3.20682
ENSMUSG00000021136	Smoc1	SPARC related modular calcium binding 1	3.22136
ENSMUSG00000038552	Fndc4	fibronectin type III domain containing 4	3.22831
ENSMUSG00000035105	Egln3	egl-9 family hypoxia-inducible factor 3	3.23404
ENSMUSG00000038390	Gpr162	G protein-coupled receptor 162	3.23668
ENSMUSG00000024008	Cpne5	copine V	3.24075
ENSMUSG00000003153	Slc2a3	solute carrier family 2 (facilitated glucose transporter), member 3	3.25452
ENSMUSG00000025272	Tro	trophinin	3.26029
ENSMUSG00000045275	Lca5l	Leber congenital amaurosis 5-like	3.29505
ENSMUSG00000031270	4930513O06Rik	RIKEN cDNA 4930513O06 gene	3.31678
ENSMUSG00000019194	Scn1b	sodium channel, voltage-gated, type I, beta	3.32046
ENSMUSG00000044037	Als2cl	ALS2 C-terminal like	3.32298
ENSMUSG00000036760	Kcnk9	potassium channel, subfamily K, member 9	3.32852
ENSMUSG00000027661	Slc2a10	solute carrier family 2 (facilitated glucose transporter), member 10	3.3341
ENSMUSG00000024349	Sting1	stimulator of interferon response cGAMP interactor 1	3.34608
ENSMUSG00000004951	Hspb1	heat shock protein 1	3.35392
ENSMUSG00000030623	Prss23os	protease, serine 23, opposite strand	3.3664
ENSMUSG00000035686	Thrsp	thyroid hormone responsive	3.36712
ENSMUSG00000038192	Cer1	cerberus 1, DAN family BMP antagonist	3.36757
ENSMUSG00000024084	Qpct	glutaminyl-peptide cyclotransferase (glutaminyl cyclase)	3.37072
ENSMUSG00000021127	Zfp36l1	zinc finger protein 36, C3H type-like 1	3.37161
ENSMUSG00000062980	Cped1	cadherin-like and PC-esterase domain containing 1	3.37443
ENSMUSG00000032649	Colgalt2	collagen beta(1-O)galactosyltransferase 2	3.37615
ENSMUSG00000035964	Tmem59l	transmembrane protein 59-like	3.38035
ENSMUSG00000068196	Col8a1	collagen, type VIII, alpha 1	3.40122
ENSMUSG00000063229	Ldha	lactate dehydrogenase A	3.42006
ENSMUSG00000031970	Dbndd1	dysbindin (dystrobrevin binding protein 1) domain containing 1	3.4225
ENSMUSG00000021062	Rab15	RAB15, member RAS oncogene family	3.42331
ENSMUSG00000031271	Serpina7	serine (or cysteine) peptidase inhibitor, clade A (alpha-1 antiproteinase, antitrypsin), member 7	3.43552
ENSMUSG00000031563	Wwc2	WW, C2 and coiled-coil domain containing 2	3.43824
ENSMUSG00000055148	Klf2	Kruppel-like factor 2 (lung)	3.45807
ENSMUSG00000022435	Upk3a	uroplakin 3A	3.4906
ENSMUSG00000104524	Gm37333	predicted gene, 37333	3.49831
ENSMUSG00000020926	Adam11	a disintegrin and metallopeptidase domain 11	3.50742
ENSMUSG00000032198	Dock6	dedicator of cytokinesis 6	3.51402
ENSMUSG00000032033	Barx2	BarH-like homeobox 2	3.5163
ENSMUSG00000029134	Plb1	phospholipase B1	3.53339
ENSMUSG00000022469	Rapgef3	Rap guanine nucleotide exchange factor (GEF) 3	3.53736
ENSMUSG00000039405	Prss23	protease, serine 23	3.55199
ENSMUSG00000025352	Gdf11	growth differentiation factor 11	3.57375
ENSMUSG00000110790	Gm47079	predicted gene, 47079	3.59063
ENSMUSG00000104503	Gm37738	predicted gene, 37738	3.59448
ENSMUSG00000011589	Fsd1	fibronectin type 3 and SPRY domain-containing protein	3.60434
ENSMUSG00000049555	Tmie	transmembrane inner ear	3.61383
ENSMUSG00000037636	Slc25a43	solute carrier family 25, member 43	3.62137
ENSMUSG00000034981	Parm1	prostate androgen-regulated mucin-like protein 1	3.64361
ENSMUSG00000110386	Gm42031	predicted gene, 42031	3.64672
ENSMUSG00000055653	Gpc3	glypican 3	3.64865
ENSMUSG00000029322	Plac8	placenta-specific 8	3.67271
ENSMUSG00000069805	Fbp1	fructose bisphosphatase 1	3.69409
ENSMUSG00000003032	Klf4	Kruppel-like factor 4 (gut)	3.73598
ENSMUSG00000048992	Prss32	protease, serine 32	3.74099
ENSMUSG00000053647	Gper1	G protein-coupled estrogen receptor 1	3.74398
ENSMUSG00000002603	Tgfb1	transforming growth factor, beta 1	3.75744
ENSMUSG00000094910	D430019H16Rik	RIKEN cDNA D430019H16 gene	3.76589
ENSMUSG00000026249	Serpine2	serine (or cysteine) peptidase inhibitor, clade E, member 2	3.77113
ENSMUSG00000036006	Ripor2	RHO family interacting cell polarization regulator 2	3.78395
ENSMUSG00000111528	Gm39460	predicted gene, 39460	3.79824
ENSMUSG00000028356	Ambp	alpha 1 microglobulin/bikunin precursor	3.85367
ENSMUSG00000031880	Rrad	Ras-related associated with diabetes	3.85377
ENSMUSG00000091172	Gm17120	predicted gene 17120	3.86552
ENSMUSG00000004558	Ndrg2	N-myc downstream regulated gene 2	3.87423
ENSMUSG00000025329	Padi1	peptidyl arginine deiminase, type I	3.87681
ENSMUSG00000040488	Ltbp4	latent transforming growth factor beta binding protein 4	3.87754
ENSMUSG00000042401	Crtac1	cartilage acidic protein 1	3.87975
ENSMUSG00000047182	Irs3	insulin receptor substrate 3	3.87979
ENSMUSG00000036814	Slc6a20a	solute carrier family 6 (neurotransmitter transporter), member 20A	3.91165
ENSMUSG00000003526	Prodh	proline dehydrogenase	3.91459
ENSMUSG00000025551	Fgf14	fibroblast growth factor 14	3.95882
ENSMUSG00000013367	Iglon5	IgLON family member 5	3.98042
ENSMUSG00000107078	Gm36840	predicted gene, 36840	4.00005
ENSMUSG00000067642	Adgrf3	adhesion G protein-coupled receptor F3	4.00716
ENSMUSG00000016349	Eef1a2	eukaryotic translation elongation factor 1 alpha 2	4.00921
ENSMUSG00000033220	Rac2	Rac family small GTPase 2	4.0161
ENSMUSG00000031302	Nlgn3	neuroligin 3	4.02238
ENSMUSG00000073530	Pappa2	pappalysin 2	4.03974
ENSMUSG00000018774	Cd68	CD68 antigen	4.04078
ENSMUSG00000085918	Gm13032	predicted gene 13032	4.05285
ENSMUSG00000019539	Rcn3	reticulocalbin 3, EF-hand calcium binding domain	4.05757
ENSMUSG00000100182	1810006J02Rik	RIKEN cDNA 1810006J02 gene	4.05937
ENSMUSG00000030669	Calca	calcitonin/calcitonin-related polypeptide, alpha	4.09312
ENSMUSG00000040747	Cd53	CD53 antigen	4.10155
ENSMUSG00000021456	Fbp2	fructose bisphosphatase 2	4.102
ENSMUSG00000032523	Hhatl	hedgehog acyltransferase-like	4.13232
ENSMUSG00000020155	Kcnmb1	potassium large conductance calcium-activated channel, subfamily M, beta member 1	4.17277
ENSMUSG00000031384	Asb9	ankyrin repeat and SOCS box-containing 9	4.17418
ENSMUSG00000031170	Slc38a5	solute carrier family 38, member 5	4.18119
ENSMUSG00000109947	Gm45669	predicted gene 45669	4.18153
ENSMUSG00000045034	Ankrd34b	ankyrin repeat domain 34B	4.18628
ENSMUSG00000042474	Fcmr	Fc fragment of IgM receptor	4.18858
ENSMUSG00000025964	Adam23	a disintegrin and metallopeptidase domain 23	4.24846
ENSMUSG00000114893	Gm48684	predicted gene, 48684	4.25549
ENSMUSG00000055555	Ct55	cancer/testis antigen 55	4.26689
ENSMUSG00000024502	Jakmip2	janus kinase and microtubule interacting protein 2	4.30579
ENSMUSG00000026288	Inpp5d	inositol polyphosphate-5-phosphatase D	4.3132
ENSMUSG00000046818	Ddit4l	DNA-damage-inducible transcript 4-like	4.35315
ENSMUSG00000053297	AI854703	expressed sequence AI854703	4.35395
ENSMUSG00000020123	Avpr1a	arginine vasopressin receptor 1A	4.35448
ENSMUSG00000078252	Krtap17-1	keratin associated protein 17-1	4.37363
ENSMUSG00000018451	6330403K07Rik	RIKEN cDNA 6330403K07 gene	4.39277
ENSMUSG00000086272	BC039966	cDNA sequence BC039966	4.39988
ENSMUSG00000026580	Selp	selectin, platelet	4.43239
ENSMUSG00000056856	Jakmip3	janus kinase and microtubule interacting protein 3	4.43555
ENSMUSG00000103114	Gm32200	predicted gene, 32200	4.44506
ENSMUSG00000030638	Sh3gl3	SH3-domain GRB2-like 3	4.4524
ENSMUSG00000026114	Cnga3	cyclic nucleotide gated channel alpha 3	4.45905
ENSMUSG00000079445	B3gnt7	UDP-GlcNAc:betaGal beta-1,3-N-acetylglucosaminyltransferase 7	4.46012
ENSMUSG00000063239	Grm4	glutamate receptor, metabotropic 4	4.46352
ENSMUSG00000054013	Tmem179	transmembrane protein 179	4.47032
ENSMUSG00000045534	Kcna5	potassium voltage-gated channel, shaker-related subfamily, member 5	4.48437
ENSMUSG00000087639	Gm15512	predicted gene 15512	4.52089
ENSMUSG00000005672	Kit	KIT proto-oncogene receptor tyrosine kinase	4.53105
ENSMUSG00000036036	Zfp57	zinc finger protein 57	4.54791
ENSMUSG00000087303	Lipo2	lipase, member O2	4.55381
ENSMUSG00000031613	Hpgd	hydroxyprostaglandin dehydrogenase 15 (NAD)	4.55651
ENSMUSG00000108042	B130021K23Rik	RIKEN cDNA B130021K23 gene	4.56246
ENSMUSG00000026639	Lamb3	laminin, beta 3	4.57768
ENSMUSG00000074489	Bglap3	bone gamma-carboxyglutamate protein 3	4.58626
ENSMUSG00000104507	A430027H14Rik	RIKEN cDNA A430027H14 gene	4.59978
ENSMUSG00000112711	Gm32552	predicted gene, 32552	4.62236
ENSMUSG00000020101	Vsir	V-set immunoregulatory receptor	4.63174
ENSMUSG00000028937	Acot7	acyl-CoA thioesterase 7	4.6352
ENSMUSG00000047821	Trim16	tripartite motif-containing 16	4.64325
ENSMUSG00000005686	Ampd3	adenosine monophosphate deaminase 3	4.64928
ENSMUSG00000003410	Elavl3	ELAV like RNA binding protein 3	4.68474
ENSMUSG00000037405	Icam1	intercellular adhesion molecule 1	4.68607
ENSMUSG00000028480	Glipr2	GLI pathogenesis-related 2	4.69554
ENSMUSG00000063506	Arhgap22	Rho GTPase activating protein 22	4.70173
ENSMUSG00000061414	Cracr2a	calcium release activated channel regulator 2A	4.71509
ENSMUSG00000051811	Cox6b2	cytochrome c oxidase subunit 6B2	4.71633
ENSMUSG00000086526	Gm12762	predicted gene 12762	4.71633
ENSMUSG00000038233	Gask1a	golgi associated kinase 1A	4.72954
ENSMUSG00000040380	Cbln3	cerebellin 3 precursor protein	4.74533
ENSMUSG00000055003	Lrtm2	leucine-rich repeats and transmembrane domains 2	4.78594
ENSMUSG00000032174	Icam5	intercellular adhesion molecule 5, telencephalin	4.78687
ENSMUSG00000091192	Sardhos	sarcosine dehydrogenase, opposite strand	4.84281
ENSMUSG00000037362	Ccn3	cellular communication network factor 3	4.86044
ENSMUSG00000068762	Gstm6	glutathione S-transferase, mu 6	4.86281
ENSMUSG00000078922	Tgtp1	T cell specific GTPase 1	4.86524
ENSMUSG00000058589	Anks1b	ankyrin repeat and sterile alpha motif domain containing 1B	4.90422
ENSMUSG00000028435	Aqp3	aquaporin 3	4.91515
ENSMUSG00000061728	Btnl7-ps	butyrophilin-like 7, pseudogene	4.919
ENSMUSG00000023078	Cxcl13	chemokine (C-X-C motif) ligand 13	4.92108
ENSMUSG00000031409	Tceal6	transcription elongation factor A (SII)-like 6	4.92201
ENSMUSG00000085779	Atcayos	ataxia, cerebellar, Cayman type, opposite strand	4.93645
ENSMUSG00000086814	Gm15677	predicted gene 15677	4.94433
ENSMUSG00000022871	Fetub	fetuin beta	4.99423
ENSMUSG00000054134	Umodl1	uromodulin-like 1	4.99659
ENSMUSG00000101445	Gm28932	predicted gene 28932	5.01889
ENSMUSG00000049871	Nlrc3	NLR family, CARD domain containing 3	5.05251
ENSMUSG00000044244	Il20rb	interleukin 20 receptor beta	5.0783
ENSMUSG00000039838	Slc45a1	solute carrier family 45, member 1	5.08369
ENSMUSG00000023828	Slc22a3	solute carrier family 22 (organic cation transporter), member 3	5.08918
ENSMUSG00000026564	Dusp27	dual specificity phosphatase 27 (putative)	5.10114
ENSMUSG00000029348	Asphd2	aspartate beta-hydroxylase domain containing 2	5.12232
ENSMUSG00000073405	H2-T-ps	histocompatibility 2, T region locus, pseudogene	5.13972
ENSMUSG00000001604	Tcea3	transcription elongation factor A (SII), 3	5.14916
ENSMUSG00000044330	Gm9790	predicted gene 9790	5.19176
ENSMUSG00000038180	Spag4	sperm associated antigen 4	5.22274
ENSMUSG00000001131	Timp1	tissue inhibitor of metalloproteinase 1	5.23161
ENSMUSG00000032554	Trf	transferrin	5.24395
ENSMUSG00000024771	Lipk	lipase, family member K	5.25045
ENSMUSG00000016346	Kcnq2	potassium voltage-gated channel, subfamily Q, member 2	5.28059
ENSMUSG00000020388	Pdlim4	PDZ and LIM domain 4	5.296
ENSMUSG00000028785	Hpca	hippocalcin	5.30667
ENSMUSG00000079491	H2-T10	histocompatibility 2, T region locus 10	5.33715
ENSMUSG00000024664	Fads3	fatty acid desaturase 3	5.34515
ENSMUSG00000043822	Adamtsl5	ADAMTS-like 5	5.35645
ENSMUSG00000049130	C5ar1	complement component 5a receptor 1	5.41195
ENSMUSG00000109446	Gm9195	predicted gene 9195	5.43692
ENSMUSG00000057948	Unc13d	unc-13 homolog D	5.45225
ENSMUSG00000115231	4930402D18Rik	RIKEN cDNA 4930402D18 gene	5.46793
ENSMUSG00000090019	Gimap1	GTPase, IMAP family member 1	5.47754
ENSMUSG00000098037	Gm7765	predicted gene 7765	5.48465
ENSMUSG00000116829	Gm49704	predicted gene, 49704	5.49434
ENSMUSG00000056973	Ces1d	carboxylesterase 1D	5.50544
ENSMUSG00000095510	Rhox3f	reproductive homeobox 3F	5.51411
ENSMUSG00000038412	Higd1a	HIG1 domain family, member 1A	5.51855
ENSMUSG00000040856	Dlk1	delta like non-canonical Notch ligand 1	5.53229
ENSMUSG00000056481	Cd248	CD248 antigen, endosialin	5.54758
ENSMUSG00000057751	Megf6	multiple EGF-like-domains 6	5.551
ENSMUSG00000106717	Gm42798	predicted gene 42798	5.55297
ENSMUSG00000110652	Gm33023	predicted gene, 33023	5.56733
ENSMUSG00000032035	Ets1	E26 avian leukemia oncogene 1, 5' domain	5.56942
ENSMUSG00000117356	Gm46633	predicted gene, 46633	5.57278
ENSMUSG00000023328	Ache	acetylcholinesterase	5.57965
ENSMUSG00000008193	Spib	Spi-B transcription factor (Spi-1/PU.1 related)	5.58949
ENSMUSG00000092604	Gm20508	predicted gene 20508	5.6077
ENSMUSG00000085881	Gm15912	predicted gene 15912	5.6371
ENSMUSG00000020836	Coro6	coronin 6	5.66991
ENSMUSG00000073565	Prr16	proline rich 16	5.68603
ENSMUSG00000025270	Alas2	aminolevulinic acid synthase 2, erythroid	5.6869
ENSMUSG00000076617	Ighm	immunoglobulin heavy constant mu	5.68819
ENSMUSG00000095620	Csta2	cystatin A family member 2	5.69232
ENSMUSG00000106441	Gm42921	predicted gene 42921	5.69924
ENSMUSG00000029718	Pcolce	procollagen C-endopeptidase enhancer protein	5.70151
ENSMUSG00000022229	Atp12a	ATPase, H+/K+ transporting, nongastric, alpha polypeptide	5.70956
ENSMUSG00000105466	Gm42998	predicted gene 42998	5.71141
ENSMUSG00000071178	Serpina1b	serine (or cysteine) preptidase inhibitor, clade A, member 1B	5.71537
ENSMUSG00000008575	Nfib	nuclear factor I/B	5.71654
ENSMUSG00000116308	Gm49482	predicted gene, 49482	5.72469
ENSMUSG00000020303	Stc2	stanniocalcin 2	5.72957
ENSMUSG00000049420	Tmem200a	transmembrane protein 200A	5.73752
ENSMUSG00000115983	Gm5476	predicted gene 5476	5.76444
ENSMUSG00000064115	Cadm2	cell adhesion molecule 2	5.76882
ENSMUSG00000089789	Rdh1	retinol dehydrogenase 1 (all trans)	5.76931
ENSMUSG00000024134	Six2	sine oculis-related homeobox 2	5.78129
ENSMUSG00000028782	Adgrb2	adhesion G protein-coupled receptor B2	5.78337
ENSMUSG00000036151	Tm6sf2	transmembrane 6 superfamily member 2	5.78829
ENSMUSG00000022416	Cacna1i	calcium channel, voltage-dependent, alpha 1I subunit	5.8033
ENSMUSG00000066189	Cacng3	calcium channel, voltage-dependent, gamma subunit 3	5.81712
ENSMUSG00000045667	Smtnl2	smoothelin-like 2	5.819
ENSMUSG00000054932	Afp	alpha fetoprotein	5.8241
ENSMUSG00000028943	Espn	espin	5.82526
ENSMUSG00000032500	Dclk3	doublecortin-like kinase 3	5.85529
ENSMUSG00000030834	Abcc6	ATP-binding cassette, sub-family C (CFTR/MRP), member 6	5.86362
ENSMUSG00000070867	Trabd2b	TraB domain containing 2B	5.87539
ENSMUSG00000087406	E130215H24Rik	RIKEN cDNA E130215H24 gene	5.90049
ENSMUSG00000089960	Ugt1a1	UDP glucuronosyltransferase 1 family, polypeptide A1	5.90134
ENSMUSG00000027570	Col9a3	collagen, type IX, alpha 3	5.90817
ENSMUSG00000067028	Cntnap5b	contactin associated protein-like 5B	5.92358
ENSMUSG00000042807	Hecw2	HECT, C2 and WW domain containing E3 ubiquitin protein ligase 2	5.94407
ENSMUSG00000006205	Htra1	HtrA serine peptidase 1	5.95653
ENSMUSG00000097636	Mirt1	myocardial infarction associated transcript 1	5.97459
ENSMUSG00000025608	Podxl	podocalyxin-like	5.97907
ENSMUSG00000040649	Rimklb	ribosomal modification protein rimK-like family member B	6.00916
ENSMUSG00000111228	Gm48789	predicted gene, 48789	6.0096
ENSMUSG00000091957	Rps2-ps10	ribosomal protein S2, pseudogene 10	6.04463
ENSMUSG00000019906	Lin7a	lin-7 homolog A, crumbs cell polarity complex component	6.05231
ENSMUSG00000039253	Fn3krp	fructosamine 3 kinase related protein	6.05355
ENSMUSG00000048108	Tmem72	transmembrane protein 72	6.07616
ENSMUSG00000024866	Acy3	aspartoacylase (aminoacylase) 3	6.09391
ENSMUSG00000043773	1700048O20Rik	RIKEN cDNA 1700048O20 gene	6.09742
ENSMUSG00000044534	Ackr2	atypical chemokine receptor 2	6.10345
ENSMUSG00000059361	Nrsn2	neurensin 2	6.10658
ENSMUSG00000047641	Krt87	keratin 87	6.10663
ENSMUSG00000106554	Gm33474	predicted gene, 33474	6.11055
ENSMUSG00000027863	Cd2	CD2 antigen	6.13086
ENSMUSG00000063234	Gpr84	G protein-coupled receptor 84	6.13415
ENSMUSG00000022221	Ripk3	receptor-interacting serine-threonine kinase 3	6.13573
ENSMUSG00000112458	Gm40773	predicted gene, 40773	6.14831
ENSMUSG00000015599	Ttbk1	tau tubulin kinase 1	6.15253
ENSMUSG00000079342	Lipo1	lipase, member O1	6.16924
ENSMUSG00000059481	Plg	plasminogen	6.17559
ENSMUSG00000013584	Aldh1a2	aldehyde dehydrogenase family 1, subfamily A2	6.18148
ENSMUSG00000036109	Mbnl3	muscleblind like splicing factor 3	6.1991
ENSMUSG00000092042	Gm17163	predicted gene 17163	6.20628
ENSMUSG00000053930	Shisa6	shisa family member 6	6.21349
ENSMUSG00000004038	Gstm3	glutathione S-transferase, mu 3	6.24432
ENSMUSG00000042804	Gpr153	G protein-coupled receptor 153	6.24801
ENSMUSG00000037568	Vash2	vasohibin 2	6.30476
ENSMUSG00000106223	2400006E01Rik	RIKEN cDNA 2400006E01 gene	6.31286
ENSMUSG00000032845	Alpk2	alpha-kinase 2	6.314
ENSMUSG00000027221	Chst1	carbohydrate sulfotransferase 1	6.32248
ENSMUSG00000038147	Cd84	CD84 antigen	6.32634
ENSMUSG00000064272	Gpbar1	G protein-coupled bile acid receptor 1	6.34918
ENSMUSG00000032492	Pth1r	parathyroid hormone 1 receptor	6.35698
ENSMUSG00000031635	Anxa10	annexin A10	6.35944
ENSMUSG00000020589	Cyria	CYFIP related Rac1 interactor A	6.36372
ENSMUSG00000117818	Gm50105	predicted gene, 50105	6.36687
ENSMUSG00000092365	BC023719	cDNA sequence BC023719	6.37633
ENSMUSG00000043789	Vwce	von Willebrand factor C and EGF domains	6.4
ENSMUSG00000024883	Rin1	Ras and Rab interactor 1	6.40244
ENSMUSG00000038349	Plcl1	phospholipase C-like 1	6.40659
ENSMUSG00000079584	Tm9sf5	transmembrane 9 superfamily member 5	6.42572
ENSMUSG00000036103	Colec12	collectin sub-family member 12	6.42588
ENSMUSG00000020044	Timp3	tissue inhibitor of metalloproteinase 3	6.42593
ENSMUSG00000079344	Lipo4	lipase, member O4	6.43583
ENSMUSG00000052911	Lamb2	laminin, beta 2	6.4491
ENSMUSG00000047180	Neurl3	neuralized E3 ubiquitin protein ligase 3	6.45001
ENSMUSG00000044071	Tafa2	TAFA chemokine like family member 2	6.46667
ENSMUSG00000005611	Irag1	inositol 1,4,5-triphosphate receptor associated 1	6.46974
ENSMUSG00000057729	Prtn3	proteinase 3	6.48688
ENSMUSG00000058147	Xlr3c	X-linked lymphocyte-regulated 3C	6.48923
ENSMUSG00000095180	Rhox5	reproductive homeobox 5	6.50767
ENSMUSG00000079235	Ccdc13	coiled-coil domain containing 13	6.50891
ENSMUSG00000117728	Gm34299	predicted gene, 34299	6.51359
ENSMUSG00000042581	Thsd7b	thrombospondin, type I, domain containing 7B	6.52845
ENSMUSG00000040808	S100g	S100 calcium binding protein G	6.53172
ENSMUSG00000061462	Obscn	obscurin, cytoskeletal calmodulin and titin-interacting RhoGEF	6.54433
ENSMUSG00000022044	Stmn4	stathmin-like 4	6.56941
ENSMUSG00000078815	Cacng6	calcium channel, voltage-dependent, gamma subunit 6	6.57144
ENSMUSG00000034958	Atcay	ataxia, cerebellar, Cayman type	6.57819
[truncated: 131 more rows]
