# Supplementary material for: CHD3 and CHD4 coordinate gene expression programs to maintain β-cell function and identity in vivo
Source: Research Square preprint supplement (doi:10.21203/rs.3.rs-7880472/v1), 2025-11-07
Supplement: Supplementary file 2 [file cf33e43ab41b73ba8a1d4133.xlsx]

## Sheet: shCHD3 vs. Control
baseMean	log2FoldChange	lfcSE	stat	pvalue	padj	ensembl_gene_id	negLog10Padj	color
10955.7	1.98645	0.180992	10.9753	5.02349e-28	1.78289e-23	ENSG00000157601	22.7489	up
15056.9	2.01416	0.188201	10.7021	9.94581e-27	1.76493e-22	ENSG00000187608	21.7533	up
6178.56	1.89816	0.185494	10.233	1.4111e-24	1.66938e-20	ENSG00000111331	19.7774	up
977.04	2.09434	0.207629	10.0869	6.31352e-24	5.60183e-20	ENSG00000078081	19.2517	up
1759.53	1.3803	0.14888	9.27125	1.8397e-20	1.30586e-16	ENSG00000181381	15.8841	up
16946.8	1.26711	0.143907	8.80505	1.3079e-18	7.73645e-15	ENSG00000115415	14.1115	up
1630.86	1.56804	0.186387	8.41282	4.0028e-17	2.02948e-13	ENSG00000130303	12.6926	up
7387.91	1.81389	0.225357	8.04896	8.34975e-16	3.35778e-12	ENSG00000119917	11.4739	up
997.888	1.98497	0.246685	8.04657	8.51483e-16	3.35778e-12	ENSG00000183486	11.4739	up
6763.52	1.67662	0.213739	7.84424	4.3558e-15	1.54592e-11	ENSG00000134321	10.8108	up
486.757	1.74544	0.23152	7.53904	4.73458e-14	1.52759e-10	ENSG00000185885	9.81599	up
831.538	2.06633	0.274945	7.51542	5.67275e-14	1.67776e-10	ENSG00000137959	9.77527	up
5511.39	1.67919	0.238183	7.04999	1.78928e-12	4.88488e-09	ENSG00000089127	8.31115	up
2.29672	28.4095	4.16131	6.82706	8.66717e-12	2.19719e-08	ENSG00000221845	7.65813	up
2480.99	1.38768	0.203622	6.81498	9.42737e-12	2.23058e-08	ENSG00000137628	7.65158	up
1214.9	-0.851464	0.131322	-6.4838	8.94407e-11	1.98396e-07	ENSG00000116032	6.70247	unchanged
5.00599	17.8907	2.77719	6.44199	1.17919e-10	2.46179e-07	ENSG00000235295	6.60875	up
3324.38	1.06815	0.166315	6.42248	1.34072e-10	2.64353e-07	ENSG00000055332	6.57782	up
3287.42	1.55942	0.248297	6.28046	3.37563e-10	6.3055e-07	ENSG00000134326	6.20028	up
1.58643	26.4402	4.30909	6.13593	8.46644e-10	1.50241e-06	ENSG00000226985	5.82321	up
491.82	1.87388	0.311452	6.0166	1.78118e-09	3.01028e-06	ENSG00000169248	5.52139	up
1.65652	25.653	4.31684	5.94254	2.80642e-09	4.52739e-06	ENSG00000248547	5.34415	up
2174.85	1.03924	0.17646	5.88937	3.87665e-09	5.98201e-06	ENSG00000184979	5.22315	up
2949.74	0.834877	0.142092	5.87561	4.21298e-09	6.23012e-06	ENSG00000163644	5.2055	unchanged
3486.95	0.778086	0.134144	5.80037	6.61672e-09	9.39335e-06	ENSG00000163840	5.02718	unchanged
3577.07	1.04306	0.180138	5.79033	7.02469e-09	9.58897e-06	ENSG00000115267	5.01823	up
4007.79	0.893535	0.154955	5.76643	8.09687e-09	1.06432e-05	ENSG00000173193	4.97293	unchanged
2100.63	-1.13728	0.197799	-5.74968	8.94126e-09	1.11271e-05	ENSG00000175868	4.95362	down
3.90956	-19.1437	3.33116	-5.74685	9.09205e-09	1.11271e-05	ENSG00000140090	4.95362	down
4.73187	21.7757	3.81906	5.70185	1.18512e-08	1.40204e-05	ENSG00000092345	4.85324	up
3.17013	-21.2575	3.75253	-5.66485	1.47157e-08	1.68476e-05	ENSG00000081248	4.77346	down
14290.2	0.48908	0.0866809	5.6423	1.67794e-08	1.86099e-05	ENSG00000104635	4.73026	unchanged
5855.88	1.07411	0.190618	5.63488	1.7518e-08	1.88404e-05	ENSG00000156587	4.72491	up
15277.7	0.697879	0.124066	5.62508	1.85421e-08	1.93552e-05	ENSG00000160710	4.7132	unchanged
603.004	1.31148	0.234707	5.58774	2.30042e-08	2.33269e-05	ENSG00000134716	4.63214	up
431.425	1.4838	0.269181	5.51228	3.54208e-08	3.49199e-05	ENSG00000130589	4.45693	up
833.4	0.618255	0.112478	5.49668	3.87011e-08	3.71227e-05	ENSG00000166912	4.43036	unchanged
9.60961	23.502	4.28235	5.4881	4.0628e-08	3.79455e-05	ENSG00000183638	4.42084	up
11475.7	-0.473595	0.0878695	-5.38976	7.05529e-08	6.42049e-05	ENSG00000145642	4.19243	unchanged
1.27974	23.23	4.35638	5.3324	9.69225e-08	8.59969e-05	ENSG00000259092	4.06552	up
8.61064	-22.809	4.3013	-5.30282	1.14027e-07	9.87056e-05	ENSG00000274588	4.00566	down
3.493	-18.7491	3.551	-5.27994	1.29225e-07	0.000109198	ENSG00000029559	3.96179	down
411.02	1.89481	0.365398	5.18559	2.15327e-07	0.000177725	ENSG00000137496	3.75025	up
1.37505	22.29	4.30384	5.17909	2.22975e-07	0.000179855	ENSG00000272995	3.74508	up
3.01676	21.9027	4.303	5.0901	3.57883e-07	0.000282258	ENSG00000280362	3.54935	up
1.71927	21.8343	4.31181	5.06384	4.10888e-07	0.000308963	ENSG00000122121	3.51009	up
2.16401	19.3892	3.83138	5.06064	4.17858e-07	0.000308963	ENSG00000175518	3.51009	up
1082.8	2.65865	0.525211	5.06207	4.14734e-07	0.000308963	ENSG00000111335	3.51009	up
12357.7	-0.398548	0.0788561	-5.05412	4.32386e-07	0.000312011	ENSG00000176840	3.50583	unchanged
1.9726	21.7511	4.30631	5.05097	4.39564e-07	0.000312011	ENSG00000235012	3.50583	up
1962.65	-0.525577	0.104516	-5.02869	4.93852e-07	0.00033805	ENSG00000198467	3.47102	unchanged
5196.85	0.737054	0.146586	5.02813	4.95297e-07	0.00033805	ENSG00000124201	3.47102	unchanged
16465.4	-0.585707	0.117016	-5.00537	5.57542e-07	0.000373353	ENSG00000147604	3.42788	unchanged
2.99923	17.0613	3.42398	4.98289	6.26425e-07	0.000411712	ENSG00000168748	3.38541	up
4.47025	-16.5781	3.33755	-4.96715	6.79433e-07	0.000438432	ENSG00000163518	3.3581	down
19049.5	-0.378517	0.0766471	-4.93845	7.87477e-07	0.000499077	ENSG00000142173	3.30183	unchanged
1.88787	21.2209	4.30758	4.92641	8.37522e-07	0.000521482	ENSG00000118194	3.28276	up
4169.48	0.441494	0.0898449	4.91395	8.92574e-07	0.000546179	ENSG00000213853	3.26267	unchanged
4288.02	0.507883	0.103611	4.90181	9.49598e-07	0.000571223	ENSG00000155629	3.24319	unchanged
16043.4	1.68134	0.343609	4.89319	9.92167e-07	0.000586884	ENSG00000126709	3.23145	up
7635.71	-0.382493	0.0784646	-4.87473	1.0896e-06	0.00063395	ENSG00000141759	3.19795	unchanged
1.83474	-20.9152	4.30179	-4.86197	1.16225e-06	0.00065475	ENSG00000162888	3.18392	down
2252.34	0.815695	0.167728	4.86321	1.15497e-06	0.00065475	ENSG00000173821	3.18392	unchanged
3241.03	1.72778	0.356477	4.84682	1.25459e-06	0.000695727	ENSG00000165949	3.15756	up
19097.1	-0.63193	0.130889	-4.82797	1.3793e-06	0.00075312	ENSG00000164587	3.12314	unchanged
0.87401	20.7886	4.30938	4.82405	1.40675e-06	0.000756467	ENSG00000173626	3.12121	up
4466.81	-0.609605	0.126574	-4.8162	1.46317e-06	0.000775065	ENSG00000228474	3.11066	unchanged
3651.82	0.53726	0.112136	4.79113	1.65841e-06	0.000842518	ENSG00000184678	3.07442	unchanged
3.10628	20.6606	4.31105	4.79249	1.64728e-06	0.000842518	ENSG00000168079	3.07442	up
1.31472	20.6532	4.31107	4.79073	1.66172e-06	0.000842518	ENSG00000110665	3.07442	up
1.64962	20.5109	4.30377	4.76579	1.88112e-06	0.00094032	ENSG00000286691	3.02672	up
2.81098	18.8023	3.94766	4.76289	1.90837e-06	0.000940696	ENSG00000171931	3.02655	up
895.118	1.05715	0.222935	4.74195	2.11676e-06	0.00102912	ENSG00000135899	2.98753	up
1.79749	20.5786	4.35863	4.72135	2.34288e-06	0.00112366	ENSG00000273771	2.94936	up
58311.9	0.563118	0.119483	4.71293	2.44177e-06	0.00114027	ENSG00000108679	2.94299	unchanged
1.39267	20.3163	4.31045	4.71326	2.43789e-06	0.00114027	ENSG00000182156	2.94299	up
1.61133	20.2352	4.30896	4.69608	2.652e-06	0.0011959	ENSG00000261449	2.92231	up
1.35551	-20.2028	4.30275	-4.69531	2.66197e-06	0.0011959	ENSG00000261714	2.92231	down
6720.56	-0.662565	0.141016	-4.6985	2.62078e-06	0.0011959	ENSG00000100097	2.92231	unchanged
0.941413	20.226	4.31677	4.68545	2.79341e-06	0.00123926	ENSG00000223718	2.90684	up
14512.6	-0.400459	0.0856312	-4.67656	2.9173e-06	0.00127825	ENSG00000105701	2.89339	unchanged
137.744	1.9925	0.42729	4.66311	3.11473e-06	0.00134811	ENSG00000132530	2.87027	up
2725.76	0.827597	0.177935	4.65112	3.30135e-06	0.00139485	ENSG00000059378	2.85547	unchanged
2614.78	1.88601	0.405708	4.64868	3.34063e-06	0.00139485	ENSG00000135114	2.85547	up
0.749607	20.1241	4.32786	4.64988	3.32124e-06	0.00139485	ENSG00000274798	2.85547	up
1.01856	20.0121	4.31795	4.63462	3.5759e-06	0.00145876	ENSG00000243574	2.83602	up
2.01124	-15.9434	3.43839	-4.63688	3.53709e-06	0.00145876	ENSG00000225751	2.83602	down
1.04868	19.9283	4.31405	4.6194	3.84846e-06	0.00150199	ENSG00000188408	2.82333	up
0.656833	19.9907	4.32646	4.62057	3.82687e-06	0.00150199	ENSG00000237263	2.82333	up
0.767559	19.9855	4.32033	4.62592	3.72942e-06	0.00150199	ENSG00000287274	2.82333	up
1464.68	-0.678106	0.1468	-4.61926	3.85115e-06	0.00150199	ENSG00000105664	2.82333	unchanged
1421.39	-0.495307	0.107318	-4.61533	3.92474e-06	0.00151405	ENSG00000148187	2.81986	unchanged
0.853348	19.9135	4.31964	4.61	4.02664e-06	0.00153666	ENSG00000270077	2.81342	up
134.363	1.89203	0.410619	4.60777	4.07019e-06	0.00153676	ENSG00000271503	2.81339	up
2.55643	19.9947	4.35146	4.59494	4.32871e-06	0.00160032	ENSG00000172752	2.79579	up
1.72347	19.7722	4.30283	4.59516	4.32423e-06	0.00160032	ENSG00000269535	2.79579	up
22005.5	-0.482852	0.105161	-4.59154	4.3998e-06	0.00160983	ENSG00000126432	2.79322	unchanged
23444.3	-0.534281	0.116564	-4.58358	4.57083e-06	0.00165534	ENSG00000117472	2.78111	unchanged
0.770744	19.791	4.32092	4.58027	4.64383e-06	0.00166479	ENSG00000224333	2.77864	up
1.21637	19.7814	4.32156	4.57737	4.7085e-06	0.00166885	ENSG00000285908	2.77758	up
0.697642	19.7334	4.31276	4.57557	4.7492e-06	0.00166885	ENSG00000264408	2.77758	up
2.39666	19.9014	4.35152	4.57344	4.79792e-06	0.00166944	ENSG00000117322	2.77743	up
885.994	1.08959	0.238615	4.56629	4.96433e-06	0.00171057	ENSG00000206337	2.76686	up
2.23101	19.856	4.35163	4.56289	5.04551e-06	0.00172183	ENSG00000134571	2.76401	up
11193.6	-0.575858	0.12644	-4.5544	5.25343e-06	0.00177571	ENSG00000109475	2.75063	unchanged
2.80693	19.5867	4.30392	4.5509	5.3417e-06	0.00178242	ENSG00000163673	2.74899	up
3824.8	0.729643	0.160443	4.54768	5.42396e-06	0.00178242	ENSG00000002549	2.74899	unchanged
119.56	1.60753	0.353363	4.54923	5.38424e-06	0.00178242	ENSG00000131203	2.74899	up
1.15104	-19.5954	4.31208	-4.5443	5.51187e-06	0.0017947	ENSG00000183396	2.74601	down
0.924916	19.6285	4.32152	4.54204	5.57122e-06	0.00179753	ENSG00000267626	2.74532	up
0.988232	19.9374	4.39624	4.5351	5.75749e-06	0.00184089	ENSG00000257035	2.73497	up
4757.92	0.867995	0.191884	4.52355	6.08121e-06	0.00188894	ENSG00000188313	2.72378	unchanged
0.923943	-19.4682	4.30506	-4.52218	6.12065e-06	0.00188894	ENSG00000289358	2.72378	down
0.685751	19.5671	4.32219	4.52712	5.97918e-06	0.00188894	ENSG00000254936	2.72378	up
8990.16	0.632445	0.139759	4.52525	6.03241e-06	0.00188894	ENSG00000149131	2.72378	unchanged
6255.59	-0.374225	0.0828926	-4.51458	6.34438e-06	0.00194111	ENSG00000104522	2.71195	unchanged
0.828104	-19.4374	4.30934	-4.51054	6.46641e-06	0.00196153	ENSG00000248360	2.7074	down
0.737359	19.501	4.33036	4.50332	6.69e-06	0.00201216	ENSG00000257137	2.69634	up
2425.46	0.798787	0.177811	4.49234	7.04452e-06	0.00210099	ENSG00000101347	2.67758	unchanged
2.82309	19.3151	4.30349	4.48824	7.18148e-06	0.00212398	ENSG00000180871	2.67285	up
729.453	1.42505	0.317709	4.48541	7.27741e-06	0.00213457	ENSG00000108771	2.67069	up
0.822515	-19.2958	4.31228	-4.47461	7.65519e-06	0.0021464	ENSG00000233845	2.66829	down
1.68421	19.2841	4.30759	4.47677	7.57818e-06	0.0021464	ENSG00000254211	2.66829	up
1.31426	19.68	4.39131	4.48159	7.40889e-06	0.0021464	ENSG00000207577	2.66829	up
3507.02	-0.564811	0.126071	-4.48011	7.46036e-06	0.0021464	ENSG00000050165	2.66829	unchanged
0.682678	19.3644	4.32526	4.47703	7.56869e-06	0.0021464	ENSG00000250133	2.66829	up
1109.08	-0.891351	0.199234	-4.4739	7.68063e-06	0.0021464	ENSG00000170004	2.66829	unchanged
0.600074	19.3399	4.32728	4.46931	7.84727e-06	0.00215897	ENSG00000184357	2.66575	up
0.83685	19.3435	4.3277	4.46969	7.83337e-06	0.00215897	ENSG00000236739	2.66575	up
0.50962	19.3473	4.3338	4.46429	8.03364e-06	0.00219324	ENSG00000272703	2.65891	up
0.512009	19.3336	4.33451	4.46039	8.18109e-06	0.00221645	ENSG00000231990	2.65434	up
3686.75	0.693059	0.155667	4.45219	8.50002e-06	0.00224063	ENSG00000138642	2.64963	unchanged
2.49219	17.0367	3.8251	4.45392	8.4315e-06	0.00224063	ENSG00000273183	2.64963	up
0.591427	19.2818	4.33143	4.45161	8.52288e-06	0.00224063	ENSG00000288964	2.64963	up
9169.98	-0.64759	0.145409	-4.45359	8.44479e-06	0.00224063	ENSG00000229117	2.64963	unchanged
252.445	1.02579	0.230544	4.44944	8.60949e-06	0.00224676	ENSG00000167280	2.64844	up
2.03922	-18.5047	4.16986	-4.43774	9.0908e-06	0.00235505	ENSG00000161180	2.628	down
2335.88	0.515927	0.116377	4.43322	9.28348e-06	0.00238754	ENSG00000169871	2.62205	unchanged
13057.3	-0.579613	0.130869	-4.42894	9.46978e-06	0.00241793	ENSG00000011465	2.61656	unchanged
0.741566	19.1188	4.3213	4.42433	9.67429e-06	0.0024525	ENSG00000220154	2.61039	up
3138.5	0.438545	0.0992271	4.41961	9.88782e-06	0.00248886	ENSG00000139687	2.604	unchanged
2335.03	-0.592389	0.134139	-4.41625	1.00429e-05	0.00251008	ENSG00000224877	2.60031	unchanged
0.761301	19.0705	4.32337	4.41101	1.02889e-05	0.00253586	ENSG00000101890	2.59587	up
75583.2	-0.607065	0.137604	-4.41167	1.02575e-05	0.00253586	ENSG00000137673	2.59587	unchanged
1.9353	-16.7615	3.80952	-4.3999	1.083e-05	0.0026508	ENSG00000286355	2.57662	down
0.765282	19.016	4.32382	4.39797	1.09269e-05	0.00265621	ENSG00000187416	2.57574	up
1.0722	18.9063	4.31305	4.3835	1.16786e-05	0.00281963	ENSG00000228634	2.54981	up
18889.6	-0.483903	0.110481	-4.37997	1.18695e-05	0.00282726	ENSG00000122406	2.54863	unchanged
13865.1	0.487684	0.111327	4.38065	1.18324e-05	0.00282726	ENSG00000145321	2.54863	unchanged
1888.45	0.554929	0.126764	4.37765	1.19965e-05	0.00283845	ENSG00000165959	2.54692	unchanged
0.427812	18.9612	4.33758	4.37138	1.23464e-05	0.00290189	ENSG00000175267	2.53732	up
1.73376	-18.7862	4.30117	-4.3677	1.25561e-05	0.00293177	ENSG00000229220	2.53287	down
20762.5	-0.53868	0.123494	-4.36199	1.28882e-05	0.00298964	ENSG00000120708	2.52438	unchanged
0.493676	18.8813	4.33221	4.35834	1.31051e-05	0.0030202	ENSG00000204776	2.51996	up
2507.85	0.773517	0.177693	4.35312	1.34215e-05	0.00305426	ENSG00000138035	2.51509	unchanged
0.429405	18.8794	4.33843	4.35166	1.3511e-05	0.00305426	ENSG00000237930	2.51509	up
0.429405	18.8794	4.33843	4.35166	1.3511e-05	0.00305426	ENSG00000273091	2.51509	up
3654.15	0.507174	0.116779	4.34301	1.40543e-05	0.00313712	ENSG00000105939	2.50347	unchanged
4915.44	-0.467808	0.107706	-4.34336	1.40317e-05	0.00313712	ENSG00000099795	2.50347	unchanged
0.809294	18.7068	4.3194	4.33087	1.48522e-05	0.0032945	ENSG00000200872	2.48221	up
1.17284	18.7226	4.32598	4.32796	1.505e-05	0.00331763	ENSG00000196344	2.47917	up
94761	-0.546797	0.126482	-4.32312	1.53838e-05	0.00332846	ENSG00000156508	2.47776	unchanged
39.9516	1.98573	0.459364	4.32278	1.54076e-05	0.00332846	ENSG00000260339	2.47776	up
1.23419	18.633	4.31137	4.32183	1.54743e-05	0.00332846	ENSG00000260161	2.47776	up
4.31591	13.6782	3.16466	4.32215	1.54517e-05	0.00332846	ENSG00000132874	2.47776	up
1487.29	0.414997	0.0960991	4.31842	1.57148e-05	0.00335985	ENSG00000153989	2.47368	unchanged
460.99	-1.17244	0.271657	-4.3159	1.58955e-05	0.00337813	ENSG00000163520	2.47132	down
0.470272	18.7026	4.33628	4.31306	1.6101e-05	0.00340143	ENSG00000288976	2.46834	up
6328.35	-0.455	0.105549	-4.31078	1.62676e-05	0.0034163	ENSG00000100867	2.46644	unchanged
1.72207	-17.659	4.10205	-4.30492	1.67046e-05	0.00348744	ENSG00000273007	2.45749	down
0.478775	18.6307	4.33304	4.29969	1.71041e-05	0.00348874	ENSG00000228739	2.45733	up
2373.18	-0.464129	0.107932	-4.30022	1.70632e-05	0.00348874	ENSG00000177469	2.45733	unchanged
1.27053	16.6864	3.8795	4.30116	1.69905e-05	0.00348874	ENSG00000278383	2.45733	up
1.03899	18.5552	4.31365	4.3015	1.69643e-05	0.00348874	ENSG00000268717	2.45733	up
2.3398	18.4626	4.30473	4.28891	1.79553e-05	0.0036003	ENSG00000281162	2.44366	up
1175.42	-0.604471	0.140904	-4.28995	1.78712e-05	0.0036003	ENSG00000152348	2.44366	unchanged
1.34021	18.517	4.3157	4.29062	1.78173e-05	0.0036003	ENSG00000286126	2.44366	up
526.107	0.762326	0.178037	4.28183	1.85361e-05	0.00369587	ENSG00000101868	2.43228	unchanged
2.33815	18.0609	4.2245	4.27528	1.90895e-05	0.00372181	ENSG00000286482	2.42925	up
1469.07	0.570267	0.133435	4.27375	1.92213e-05	0.00372181	ENSG00000180182	2.42925	unchanged
219.578	-1.30879	0.305869	-4.27892	1.87805e-05	0.00372181	ENSG00000110680	2.42925	down
2.59098	18.395	4.30504	4.27289	1.92954e-05	0.00372181	ENSG00000231256	2.42925	up
2216.08	0.694045	0.162396	4.27379	1.92177e-05	0.00372181	ENSG00000128335	2.42925	unchanged
0.907435	18.4424	4.31592	4.27312	1.92757e-05	0.00372181	ENSG00000226501	2.42925	up
0.686724	18.4593	4.32209	4.27093	1.94661e-05	0.00373445	ENSG00000248150	2.42777	up
0.783786	18.441	4.3211	4.26765	1.97539e-05	0.00376928	ENSG00000271597	2.42374	up
896.861	-0.748114	0.175362	-4.26612	1.98901e-05	0.00377498	ENSG00000116711	2.42309	unchanged
395.607	0.976158	0.229136	4.26016	2.04278e-05	0.0038564	ENSG00000111801	2.41382	unchanged
3526.1	-0.44705	0.105006	-4.2574	2.06822e-05	0.00388377	ENSG00000174917	2.41075	unchanged
5761.62	0.402573	0.094745	4.24902	2.14708e-05	0.00401064	ENSG00000119125	2.39679	unchanged
0.506547	18.431	4.34514	4.24176	2.2177e-05	0.00405713	ENSG00000237685	2.39178	up
0.506547	18.431	4.34514	4.24176	2.2177e-05	0.00405713	ENSG00000240385	2.39178	up
0.506547	18.431	4.34514	4.24176	2.2177e-05	0.00405713	ENSG00000279286	2.39178	up
0.711445	18.3818	4.33041	4.24481	2.18782e-05	0.00405713	ENSG00000264739	2.39178	up
15990.3	-0.580314	0.137083	-4.23331	2.30272e-05	0.00416969	ENSG00000164405	2.3799	unchanged
1.61391	18.2427	4.30915	4.23348	2.30101e-05	0.00416969	ENSG00000272395	2.3799	up
0.718462	18.1922	4.32192	4.20929	2.5618e-05	0.00456888	ENSG00000272784	2.34019	up
0.718462	18.1922	4.32192	4.20929	2.5618e-05	0.00456888	ENSG00000221836	2.34019	up
3025.96	0.449994	0.10689	4.20987	2.55512e-05	0.00456888	ENSG00000138613	2.34019	unchanged
854.86	-0.690101	0.164065	-4.20626	2.5963e-05	0.00460726	ENSG00000163331	2.33656	unchanged
5724.97	-0.295903	0.0703977	-4.2033	2.63052e-05	0.00464477	ENSG00000167588	2.33304	unchanged
11360.6	-0.586973	0.13971	-4.20136	2.65317e-05	0.00466157	ENSG00000177954	2.33147	unchanged
0.929092	18.1254	4.31606	4.19953	2.67464e-05	0.00467614	ENSG00000258670	2.33011	up
0.988571	18.0887	4.31519	4.19185	2.76687e-05	0.00478181	ENSG00000253300	2.32041	up
0.990563	18.089	4.31555	4.19159	2.77009e-05	0.00478181	ENSG00000177938	2.32041	up
0.585169	18.2	4.3425	4.19115	2.7755e-05	0.00478181	ENSG00000286788	2.32041	up
4681.74	-0.57657	0.137642	-4.18892	2.80282e-05	0.00478245	ENSG00000145425	2.32035	unchanged
2.20044	18.0464	4.30714	4.18988	2.79101e-05	0.00478245	ENSG00000284196	2.32035	up
1.23646	18.0452	4.3113	4.18555	2.84476e-05	0.00483078	ENSG00000249621	2.31598	up
1.53132	18.0215	4.3084	4.18287	2.87852e-05	0.00486484	ENSG00000263120	2.31293	up
0.830943	18.0929	4.32772	4.1807	2.90616e-05	0.00488828	ENSG00000223730	2.31084	up
1.07601	18.1075	4.33724	4.17488	2.98141e-05	0.00499119	ENSG00000289526	2.3018	up
1.76254	17.9798	4.30858	4.17302	3.00585e-05	0.00500849	ENSG00000288021	2.30029	up
0.461769	18.1285	4.34738	4.16999	3.04611e-05	0.00505185	ENSG00000290484	2.29655	up
1.28397	17.9508	4.31096	4.164	3.12715e-05	0.00511961	ENSG00000164411	2.29076	up
1.89152	17.9698	4.31486	4.16462	3.11873e-05	0.00511961	ENSG00000261435	2.29076	up
1.43656	17.902	4.30121	4.16208	3.15367e-05	0.00511961	ENSG00000273381	2.29076	up
949.794	-0.972041	0.233569	-4.16168	3.1591e-05	0.00511961	ENSG00000064300	2.29076	unchanged
3.39308	-13.9142	3.34188	-4.1636	3.13272e-05	0.00511961	ENSG00000006788	2.29076	down
19772.2	-0.553665	0.133268	-4.15452	3.25969e-05	0.00525863	ENSG00000122026	2.27913	unchanged
1.16137	17.976	4.33043	4.15108	3.30906e-05	0.00529026	ENSG00000273597	2.27652	up
2.14442	17.8879	4.30922	4.15108	3.30911e-05	0.00529026	ENSG00000233471	2.27652	up
1.19043	17.8434	4.30395	4.14581	3.38611e-05	0.00536501	ENSG00000243797	2.27043	up
1.4555	17.8848	4.3135	4.14625	3.37964e-05	0.00536501	ENSG00000259335	2.27043	up
0.742673	17.8857	4.3204	4.13984	3.47549e-05	0.00548216	ENSG00000288737	2.26105	up
0.989069	17.8496	4.31497	4.13667	3.52381e-05	0.00553378	ENSG00000216360	2.25698	up
1.88168	-16.6385	4.02672	-4.13202	3.59596e-05	0.00562221	ENSG00000213731	2.25009	down
0.823809	17.8161	4.31998	4.12413	3.72146e-05	0.0057929	ENSG00000286338	2.2371	up
6715.22	-0.425994	0.103336	-4.12241	3.74926e-05	0.0058107	ENSG00000130733	2.23577	unchanged
604.646	1.03224	0.250556	4.11979	3.79221e-05	0.00585171	ENSG00000120217	2.23272	up
3053.84	0.486674	0.118184	4.11792	3.82301e-05	0.0058737	ENSG00000116698	2.23109	unchanged
0.573151	17.88	4.34456	4.11549	3.8636e-05	0.00588511	ENSG00000204455	2.23025	up
1.37162	17.746	4.31119	4.11625	3.85081e-05	0.00588511	ENSG00000229696	2.23025	up
0.939053	17.7536	4.3163	4.11314	3.9031e-05	0.00589468	ENSG00000231892	2.22954	up
3672.81	-0.504908	0.122732	-4.11392	3.89002e-05	0.00589468	ENSG00000198074	2.22954	unchanged
1.04239	17.7381	4.31486	4.11093	3.94066e-05	0.00592619	ENSG00000164822	2.22722	up
14261.1	-0.530709	0.12913	-4.10989	3.95852e-05	0.00592793	ENSG00000168653	2.2271	unchanged
3633.02	0.359046	0.0874086	4.10768	3.99661e-05	0.00595982	ENSG00000160131	2.22477	unchanged
998.394	0.646217	0.157584	4.10078	4.11768e-05	0.00611467	ENSG00000213079	2.21363	unchanged
1.59541	-17.6336	4.30392	-4.09711	4.18345e-05	0.00618645	ENSG00000235397	2.20856	down
1.21462	17.6565	4.31196	4.09477	4.22579e-05	0.00622314	ENSG00000288547	2.20599	up
7484.17	-0.435753	0.106459	-4.09316	4.25532e-05	0.00624073	ENSG00000131981	2.20476	unchanged
0.659545	17.6823	4.32314	4.09014	4.31109e-05	0.0062451	ENSG00000218631	2.20446	up
1.32779	-17.6303	4.31039	-4.09018	4.31041e-05	0.0062451	ENSG00000147223	2.20446	down
0.790875	-17.621	4.30752	-4.09074	4.29997e-05	0.0062451	ENSG00000284664	2.20446	down
9735.22	0.600486	0.146951	4.08632	4.38274e-05	0.00632309	ENSG00000138496	2.19907	unchanged
54065.2	-0.561358	0.137412	-4.08521	4.40368e-05	0.00632757	ENSG00000092841	2.19876	unchanged
1.12689	17.6121	4.31315	4.08335	4.43903e-05	0.00635265	ENSG00000239696	2.19705	up
2.44053	-17.5513	4.30441	-4.07752	4.55185e-05	0.00646199	ENSG00000287244	2.18963	down
0.537685	17.6545	4.32954	4.0777	4.54841e-05	0.00646199	ENSG00000237520	2.18963	up
1.38457	-17.3855	4.26623	-4.07515	4.59847e-05	0.00650217	ENSG00000234661	2.18694	down
0.848917	17.7097	4.34915	4.072	4.66103e-05	0.00656448	ENSG00000286305	2.1828	up
1.08387	17.5584	4.31355	4.07052	4.69086e-05	0.00658037	ENSG00000212237	2.18175	up
9480.33	-0.487988	0.120098	-4.06324	4.83953e-05	0.00658083	ENSG00000117450	2.18172	unchanged
1.20697	-17.5296	4.31173	-4.06557	4.79153e-05	0.00658083	ENSG00000169006	2.18172	down
1932.22	-0.506068	0.124441	-4.06672	4.76789e-05	0.00658083	ENSG00000150540	2.18172	unchanged
1.71047	-17.4908	4.30267	-4.0651	4.80115e-05	0.00658083	ENSG00000286017	2.18172	down
2.02539	17.7048	4.35383	4.0665	4.77254e-05	0.00658083	ENSG00000287597	2.18172	up
1.07235	17.5578	4.31587	4.06819	4.738e-05	0.00658083	ENSG00000286985	2.18172	up
1.78121	-17.4921	4.30403	-4.06412	4.82147e-05	0.00658083	ENSG00000230778	2.18172	down
0.882612	17.5478	4.31729	4.06455	4.81253e-05	0.00658083	ENSG00000184571	2.18172	up
1.047	17.5067	4.31441	4.05772	4.95549e-05	0.00663681	ENSG00000287055	2.17804	up
0.890059	17.5311	4.31999	4.05814	4.94651e-05	0.00663681	ENSG00000226661	2.17804	up
2.62556	-17.6588	4.35145	-4.05814	4.94656e-05	0.00663681	ENSG00000228510	2.17804	down
2233.83	-0.555317	0.136834	-4.05833	4.94246e-05	0.00663681	ENSG00000134809	2.17804	unchanged
5312.63	0.423465	0.104408	4.05585	4.99513e-05	0.00664281	ENSG00000164040	2.17765	unchanged
1.03014	17.4561	4.30404	4.05575	4.99741e-05	0.00664281	ENSG00000255286	2.17765	up
1.4591	17.4789	4.31216	4.05341	5.04765e-05	0.0066597	ENSG00000249436	2.17655	up
233.707	-1.22137	0.301271	-4.05404	5.03416e-05	0.0066597	ENSG00000105509	2.17655	down
0.515942	17.5345	4.33018	4.04937	5.13568e-05	0.00670111	ENSG00000225233	2.17385	up
0.515942	17.5345	4.33018	4.04937	5.13568e-05	0.00670111	ENSG00000279746	2.17385	up
0.515942	17.5345	4.33018	4.04937	5.13568e-05	0.00670111	ENSG00000268355	2.17385	up
1.13027	17.4676	4.31459	4.04849	5.15487e-05	0.00670151	ENSG00000285800	2.17383	up
111326	-0.443946	0.109749	-4.04511	5.22979e-05	0.0067741	ENSG00000108821	2.16915	unchanged
1.27473	17.4553	4.31634	4.044	5.25467e-05	0.00678159	ENSG00000130377	2.16867	up
1.38179	17.513	4.33323	4.04156	5.30968e-05	0.00682775	ENSG00000267065	2.16572	up
5185.42	-0.487169	0.120715	-4.03569	5.4442e-05	0.00697545	ENSG00000198755	2.15643	unchanged
0.988073	17.4217	4.31839	4.0343	5.47658e-05	0.00699171	ENSG00000179342	2.15542	up
0.586791	17.4794	4.34249	4.0252	5.69274e-05	0.00724162	ENSG00000121377	2.14016	up
4440	-0.4733	0.117626	-4.02377	5.72747e-05	0.00725978	ENSG00000138175	2.13908	unchanged
0.96082	-17.356	4.31477	-4.02246	5.75931e-05	0.00727415	ENSG00000267592	2.13822	down
1.70836	17.3252	4.31535	4.01479	5.94983e-05	0.00733697	ENSG00000203737	2.13448	up
6345.68	-0.46562	0.115905	-4.01727	5.88763e-05	0.00733697	ENSG00000126088	2.13448	unchanged
1.09145	17.341	4.32033	4.01382	5.97443e-05	0.00733697	ENSG00000229742	2.13448	up
0.762922	17.3542	4.32327	4.01415	5.96603e-05	0.00733697	ENSG00000271820	2.13448	up
1.93257	17.3883	4.32925	4.01647	5.90772e-05	0.00733697	ENSG00000279029	2.13448	up
0.762922	17.3542	4.32327	4.01415	5.96603e-05	0.00733697	ENSG00000258954	2.13448	up
71.2644	3.12444	0.777372	4.01923	5.83891e-05	0.00733697	ENSG00000133392	2.13448	up
1.17783	17.3367	4.31734	4.01559	5.92973e-05	0.00733697	ENSG00000264116	2.13448	up
1000.93	-0.652968	0.16278	-4.01135	6.03726e-05	0.00738857	ENSG00000083457	2.13144	unchanged
1.60093	17.472	4.35771	4.00945	6.08593e-05	0.00742254	ENSG00000261795	2.12945	up
1.6385	17.2821	4.31593	4.00426	6.22118e-05	0.0075615	ENSG00000225988	2.12139	up
1.00932	17.2916	4.32084	4.0019	6.28367e-05	0.00756257	ENSG00000285810	2.12133	up
4456.63	-0.567092	0.141709	-4.00181	6.28599e-05	0.00756257	ENSG00000188243	2.12133	unchanged
1.2156	17.2714	4.31481	4.00282	6.25919e-05	0.00756257	ENSG00000226158	2.12133	up
1.06083	17.2849	4.32174	3.99951	6.34726e-05	0.00758487	ENSG00000224430	2.12005	up
1.09395	17.2829	4.32073	4	6.33429e-05	0.00758487	ENSG00000285684	2.12005	up
0.974955	17.2576	4.31706	3.99752	6.40092e-05	0.00762333	ENSG00000255553	2.11786	up
5606.74	-0.588516	0.147394	-3.99281	6.52941e-05	0.00775034	ENSG00000213741	2.11068	unchanged
4248.34	-0.438249	0.110028	-3.98307	6.80315e-05	0.00802162	ENSG00000231013	2.09574	unchanged
6213.6	-0.500045	0.125533	-3.98339	6.79383e-05	0.00802162	ENSG00000145592	2.09574	unchanged
17.6607	4.95815	1.24613	3.97883	6.92547e-05	0.00812331	ENSG00000165197	2.09027	up
1.81035	17.2374	4.33287	3.97829	6.94139e-05	0.00812331	ENSG00000152910	2.09027	up
0.819546	-17.1769	4.31828	-3.97772	6.95806e-05	0.00812331	ENSG00000287410	2.09027	down
0.905443	17.1804	4.32225	3.97488	7.04138e-05	0.00819363	ENSG00000100122	2.08652	up
3680.53	-0.592306	0.14905	-3.97388	7.07115e-05	0.00820138	ENSG00000171858	2.08611	unchanged
2037.77	0.542798	0.136624	3.97293	7.09932e-05	0.00820723	ENSG00000234127	2.0858	unchanged
0.806562	17.1425	4.31867	3.9694	7.20539e-05	0.00827594	ENSG00000272203	2.08218	up
0.806562	17.1425	4.31867	3.9694	7.20539e-05	0.00827594	ENSG00000260239	2.08218	up
0.772204	17.1495	4.32233	3.96767	7.258e-05	0.00830948	ENSG00000213244	2.08043	up
6975.47	-0.620008	0.156344	-3.96566	7.31945e-05	0.00835289	ENSG00000134825	2.07816	unchanged
2857.48	0.377071	0.095189	3.96128	7.4548e-05	0.00848007	ENSG00000163428	2.0716	unchanged
1455.56	-0.499365	0.126091	-3.96035	7.48396e-05	0.00848604	ENSG00000137094	2.07129	unchanged
2.13368	-17.0371	4.30566	-3.9569	7.59282e-05	0.00855481	ENSG00000235683	2.06779	down
374.94	-1.04851	0.264967	-3.95715	7.5849e-05	0.00855481	ENSG00000188487	2.06779	down
0.757022	-17.1081	4.32751	-3.95334	7.70674e-05	0.0086557	ENSG00000247774	2.0627	down
0.792681	-17.0987	4.32761	-3.95106	7.78051e-05	0.00870729	ENSG00000253119	2.06012	down
2.22923	-17.0064	4.30497	-3.95041	7.80174e-05	0.00870729	ENSG00000285887	2.06012	down
3999.21	-0.44458	0.11262	-3.9476	7.8939e-05	0.00875508	ENSG00000078098	2.05774	unchanged
1.3207	17.2087	4.35887	3.94798	7.88138e-05	0.00875508	ENSG00000279537	2.05774	up
0.892566	17.1469	4.34915	3.94258	8.06112e-05	0.00891269	ENSG00000259592	2.04999	up
1901.1	-0.575155	0.146044	-3.93824	8.2081e-05	0.009019	ENSG00000172339	2.04484	unchanged
0.875868	-17.0043	4.31742	-3.93854	8.19804e-05	0.009019	ENSG00000228815	2.04484	down
1.78186	-16.9674	4.30979	-3.93695	8.25244e-05	0.00903974	ENSG00000143105	2.04384	down
0.888136	17.2282	4.37772	3.93543	8.30471e-05	0.00906468	ENSG00000239670	2.04265	up
3295.06	0.601325	0.152822	3.93481	8.3263e-05	0.00906468	ENSG00000137200	2.04265	unchanged
2262.21	0.819589	0.20836	3.93352	8.37112e-05	0.00908561	ENSG00000138646	2.04165	unchanged
1837.83	-0.484109	0.123123	-3.93193	8.42665e-05	0.00911799	ENSG00000170310	2.0401	unchanged
1.33191	16.9988	4.32483	3.93052	8.47615e-05	0.00914368	ENSG00000151838	2.03888	up
3035.21	0.414501	0.105545	3.92724	8.59248e-05	0.00924108	ENSG00000061987	2.03428	unchanged
4636.89	-0.52465	0.133687	-3.92447	8.69204e-05	0.00925678	ENSG00000169429	2.03354	unchanged
11628.7	-0.626661	0.159702	-3.92394	8.71141e-05	0.00925678	ENSG00000197061	2.03354	unchanged
1.64131	-16.907	4.30819	-3.92438	8.6953e-05	0.00925678	ENSG00000106302	2.03354	down
8314.8	-0.465867	0.118723	-3.92399	8.70938e-05	0.00925678	ENSG00000165775	2.03354	unchanged
2049.75	-0.430573	0.109765	-3.92269	8.75662e-05	0.00927705	ENSG00000135617	2.03259	unchanged
6146.36	0.484879	0.123866	3.91455	9.05732e-05	0.00939922	ENSG00000069702	2.02691	unchanged
6132.7	-0.499124	0.127492	-3.91495	9.04224e-05	0.00939922	ENSG00000188846	2.02691	unchanged
1.0986	16.9471	4.32634	3.91719	8.95873e-05	0.00939922	ENSG00000244791	2.02691	up
0.564651	16.9469	4.32791	3.91572	9.01342e-05	0.00939922	ENSG00000286944	2.02691	up
0.562599	16.9537	4.32861	3.91666	8.97858e-05	0.00939922	ENSG00000270259	2.02691	up
0.564651	16.9469	4.32791	3.91572	9.01342e-05	0.00939922	ENSG00000214875	2.02691	up
1958.23	-0.658561	0.168073	-3.91831	8.91703e-05	0.00939922	ENSG00000133110	2.02691	unchanged
0.657995	17.001	4.34514	3.91264	9.12913e-05	0.00944612	ENSG00000201728	2.02475	up
0.635041	16.9419	4.3311	3.91167	9.16591e-05	0.00945661	ENSG00000105679	2.02426	up
0.510593	16.941	4.3335	3.9093	9.2563e-05	0.00952218	ENSG00000224683	2.02126	up
1416.45	0.614774	0.157318	3.90783	9.31278e-05	0.0095526	ENSG00000121060	2.01988	unchanged
0.712938	-16.8723	4.32163	-3.90414	9.45594e-05	0.00967149	ENSG00000255317	2.01451	down
12041	-0.376082	0.096402	-3.90119	9.57206e-05	0.00976213	ENSG00000137818	2.01046	unchanged
4474.29	-0.481417	0.123715	-3.89133	9.96961e-05	0.0101384	ENSG00000100300	1.99403	unchanged
0.5734	-16.8231	4.32615	-3.8887	0.000100781	0.0101617	ENSG00000233936	1.99303	down
13936.8	-0.437875	0.112597	-3.88886	0.000100717	0.0101617	ENSG00000142541	1.99303	unchanged
0.467809	16.8515	4.33345	3.8887	0.000100784	0.0101617	ENSG00000228677	1.99303	up
0.564289	16.8264	4.32977	3.88622	0.000101818	0.010208	ENSG00000243568	1.99106	up
0.646785	16.8132	4.32607	3.88648	0.00010171	0.010208	ENSG00000236838	1.99106	up
68345.4	-0.330275	0.0850459	-3.88349	0.000102966	0.010294	ENSG00000102265	1.98742	unchanged
2005.61	-0.523626	0.13522	-3.8724	0.000107767	0.0106837	ENSG00000244187	1.97128	unchanged
0.564748	16.81	4.34036	3.87296	0.000107522	0.0106837	ENSG00000287159	1.97128	up
2780.44	-0.429494	0.110881	-3.87345	0.000107305	0.0106837	ENSG00000015475	1.97128	unchanged
714.865	0.570493	0.14735	3.87169	0.000108084	0.0106852	ENSG00000121210	1.97122	unchanged
15179.2	-0.563605	0.145687	-3.86862	0.000109455	0.0107108	ENSG00000135940	1.97018	unchanged
9199.44	-0.529852	0.136969	-3.8684	0.00010955	0.0107108	ENSG00000090266	1.97018	unchanged
72.5391	-2.66121	0.687655	-3.86998	0.000108844	0.0107108	ENSG00000106331	1.97018	down
316.235	0.829767	0.214484	3.86867	0.000109429	0.0107108	ENSG00000167981	1.97018	unchanged
13592.4	-0.56009	0.144847	-3.86678	0.000110281	0.010728	ENSG00000071082	1.96948	unchanged
0.482711	16.7531	4.33372	3.86575	0.000110746	0.010728	ENSG00000243687	1.96948	up
0.482711	16.7531	4.33372	3.86575	0.000110746	0.010728	ENSG00000064835	1.96948	up
20196.6	-0.290404	0.0751303	-3.86534	0.000110934	0.010728	ENSG00000168003	1.96948	unchanged
4488.75	-0.591014	0.153285	-3.85566	0.000115417	0.0111312	ENSG00000183011	1.95346	unchanged
7431.14	-0.567631	0.147255	-3.85475	0.000115849	0.0111425	ENSG00000125691	1.95302	unchanged
4476.8	-0.516954	0.134157	-3.85334	0.000116517	0.0111765	ENSG00000102048	1.95169	unchanged
2.17385	-16.2697	4.2239	-3.85181	0.000117247	0.0112162	ENSG00000249012	1.95016	down
1.72327	-16.5868	4.30836	-3.84992	0.000118157	0.0112728	ENSG00000229794	1.94797	down
1.38431	-16.6199	4.3179	-3.84906	0.000118572	0.0112821	ENSG00000238117	1.94761	down
2.05411	-14.412	3.74674	-3.84655	0.000119793	0.0113679	ENSG00000232002	1.94432	down
0.758557	16.6523	4.33013	3.84568	0.000120218	0.0113778	ENSG00000258521	1.94394	up
1518.49	0.412082	0.10721	3.84368	0.000121204	0.0114406	ENSG00000138032	1.94155	unchanged
1138.37	-0.553816	0.144221	-3.84006	0.000123003	0.0115796	ENSG00000161281	1.93631	unchanged
1.90976	-16.5327	4.30666	-3.83887	0.000123603	0.0116053	ENSG00000286741	1.93535	down
0.757422	-16.4745	4.29586	-3.83496	0.000125582	0.01176	ENSG00000165837	1.92959	down
2.21815	-16.4949	4.30471	-3.83183	0.000127194	0.0118796	ENSG00000253490	1.9252	down
0.493732	16.6337	4.35383	3.82047	0.000133196	0.0123531	ENSG00000242696	1.90822	up
1.39524	-16.4637	4.30958	-3.82027	0.000133308	0.0123531	ENSG00000271993	1.90822	down
0.730511	16.5439	4.33009	3.82068	0.000133086	0.0123531	ENSG00000253965	1.90822	up
1.13131	-16.5137	4.32613	-3.8172	0.000134977	0.0124752	ENSG00000288162	1.90395	down
1.24385	16.5474	4.33631	3.81601	0.000135629	0.0125028	ENSG00000289168	1.90299	up
0.644178	16.4792	4.32457	3.8106	0.000138631	0.0127248	ENSG00000261588	1.89535	up
1.27776	16.5932	4.35474	3.81038	0.000138753	0.0127248	ENSG00000279678	1.89535	up
1.83414	-16.4088	4.30748	-3.80939	0.000139312	0.0127431	ENSG00000269220	1.89473	down
10430.1	-0.319861	0.0840648	-3.80493	0.000141841	0.0129411	ENSG00000142534	1.88803	unchanged
29031.5	-0.566505	0.148943	-3.8035	0.000142666	0.012983	ENSG00000124172	1.88663	unchanged
5528.77	-0.320785	0.0843982	-3.80085	0.000144202	0.0130558	ENSG00000123416	1.8842	unchanged
1191.77	-0.484034	0.127338	-3.80117	0.000144017	0.0130558	ENSG00000196465	1.8842	unchanged
0.812319	16.4318	4.32905	3.79571	0.000147219	0.0132951	ENSG00000232455	1.87631	up
1289.93	-0.563578	0.148565	-3.79349	0.000148547	0.0133809	ENSG00000156482	1.87351	unchanged
0.814238	16.4422	4.34066	3.78795	0.000151893	0.0136476	ENSG00000221977	1.86494	up
5902.22	-0.590823	0.15625	-3.78126	0.000156035	0.0139845	ENSG00000112306	1.85435	unchanged
0.736086	-16.3255	4.32397	-3.77558	0.000159635	0.014271	ENSG00000263443	1.84554	down
0.550577	-16.3307	4.32842	-3.77291	0.000161356	0.0143281	ENSG00000248356	1.84381	down
1.63923	-16.255	4.30857	-3.77271	0.000161484	0.0143281	ENSG00000106328	1.84381	down
0.550577	-16.3307	4.32842	-3.77291	0.000161356	0.0143281	ENSG00000258630	1.84381	down
0.640462	-16.3296	4.33075	-3.77062	0.000162845	0.01441	ENSG00000274678	1.84134	down
1005.37	0.9852	0.261323	3.77004	0.000163219	0.01441	ENSG00000154930	1.84134	unchanged
17.4838	-5.43197	1.44204	-3.76686	0.000165311	0.0145585	ENSG00000185811	1.83688	down
1240.41	0.609231	0.161962	3.76156	0.000168856	0.0146884	ENSG00000136381	1.83302	unchanged
1050.66	0.997806	0.265199	3.76248	0.000168239	0.0146884	ENSG00000172183	1.83302	unchanged
0.536104	16.3484	4.34458	3.76294	0.000167928	0.0146884	ENSG00000230176	1.83302	up
2217.15	-0.418632	0.111287	-3.76174	0.000168732	0.0146884	ENSG00000105281	1.83302	unchanged
0.758603	-16.2609	4.32203	-3.76232	0.000168346	0.0146884	ENSG00000100429	1.83302	down
5508.61	-0.430134	0.114541	-3.75528	0.000173146	0.0149623	ENSG00000141753	1.825	unchanged
1.54309	-15.7565	4.19601	-3.7551	0.00017327	0.0149623	ENSG00000268278	1.825	down
4405.16	-0.351799	0.0936856	-3.7551	0.000173269	0.0149623	ENSG00000170889	1.825	unchanged
4706.56	0.689629	0.183857	3.75091	0.000176196	0.015178	ENSG00000125107	1.81878	unchanged
2013.32	-0.455939	0.121708	-3.74618	0.000179549	0.0154295	ENSG00000134013	1.81165	unchanged
4021.32	-0.398286	0.106498	-3.73984	0.000184136	0.0157854	ENSG00000184990	1.80174	unchanged
1275.94	0.520582	0.139226	3.7391	0.000184679	0.0157938	ENSG00000131791	1.80151	unchanged
0.553989	-16.1721	4.32766	-3.73693	0.000186284	0.0158191	ENSG00000277948	1.80082	down
0.486778	16.3398	4.37257	3.73689	0.000186311	0.0158191	ENSG00000255109	1.80082	up
0.486778	16.3398	4.37257	3.73689	0.000186311	0.0158191	ENSG00000259051	1.80082	up
0.556377	-16.1704	4.32814	-3.73611	0.000186889	0.0158303	ENSG00000226229	1.80051	down
1.88873	-16.0785	4.31064	-3.72995	0.000191518	0.0161453	ENSG00000162761	1.79195	down
0.530414	16.2102	4.34566	3.7302	0.000191328	0.0161453	ENSG00000236478	1.79195	up
1490.79	-0.453649	0.121704	-3.72747	0.000193411	0.0162278	ENSG00000087842	1.78974	unchanged
1.25054	-16.0723	4.31148	-3.7278	0.000193156	0.0162278	ENSG00000036565	1.78974	down
674.936	-0.635672	0.170575	-3.72664	0.000194046	0.0162427	ENSG00000223941	1.78934	unchanged
11522.4	-0.383619	0.102988	-3.72489	0.000195398	0.0162813	ENSG00000104341	1.78831	unchanged
70.4563	1.42395	0.382284	3.72486	0.000195426	0.0162813	ENSG00000107201	1.78831	up
850.369	0.967024	0.259808	3.72208	0.000197591	0.0164232	ENSG00000026950	1.78454	unchanged
7378.96	-0.466832	0.125523	-3.71909	0.000199943	0.0165798	ENSG00000129235	1.78042	unchanged
1.09495	-16.0211	4.31254	-3.71499	0.00020321	0.0168115	ENSG00000220773	1.77439	down
7318.29	-0.507777	0.136735	-3.71359	0.000204342	0.0168658	ENSG00000138326	1.77299	unchanged
0.726936	-16.1159	4.34087	-3.7126	0.000205139	0.0168686	ENSG00000174429	1.77292	down
0.572796	16.1309	4.34518	3.71237	0.000205326	0.0168686	ENSG00000234788	1.77292	up
1.52283	-16.0156	4.3157	-3.711	0.000206443	0.0168822	ENSG00000229808	1.77257	down
0.757116	-16.1083	4.34041	-3.71125	0.000206241	0.0168822	ENSG00000169777	1.77257	down
1.06688	-15.9942	4.31375	-3.70774	0.000209118	0.0170616	ENSG00000243398	1.76798	down
5643.69	-0.484398	0.130871	-3.70134	0.000214461	0.0174175	ENSG00000166741	1.75901	unchanged
23240.9	-0.353496	0.0954959	-3.70169	0.000214166	0.0174175	ENSG00000140988	1.75901	unchanged
3192.94	0.815584	0.22042	3.70014	0.000215478	0.0174203	ENSG00000068079	1.75894	unchanged
8191.44	-0.568109	0.153533	-3.70025	0.000215391	0.0174203	ENSG00000100234	1.75894	unchanged
0.721585	-15.9967	4.32464	-3.69895	0.00021649	0.0174624	ENSG00000251292	1.7579	down
0.490193	16.0769	4.34735	3.69809	0.000217225	0.0174767	ENSG00000227088	1.75754	up
1.48676	-15.9566	4.31541	-3.69759	0.000217652	0.0174767	ENSG00000234835	1.75754	down
0.775237	16.1758	4.37781	3.69495	0.000219928	0.0176196	ENSG00000258823	1.75401	up
25609	-0.386083	0.104561	-3.69242	0.000222134	0.0177562	ENSG00000106366	1.75065	unchanged
1.27419	-15.9177	4.31167	-3.69178	0.000222691	0.0177607	ENSG00000276272	1.75054	down
54881.1	-0.405676	0.109954	-3.6895	0.000224694	0.0178518	ENSG00000074800	1.74832	unchanged
1.01282	-15.9189	4.31483	-3.68934	0.000224838	0.0178518	ENSG00000243986	1.74832	down
193507	-0.404609	0.109722	-3.68758	0.000226397	0.0179354	ENSG00000118785	1.74629	unchanged
22023.3	-0.424776	0.115218	-3.68672	0.000227159	0.0179553	ENSG00000213719	1.74581	unchanged
1707.48	-0.536373	0.14551	-3.68616	0.000227661	0.0179553	ENSG00000239672	1.74581	unchanged
15.2044	3.94081	1.06969	3.68407	0.000229539	0.0180634	ENSG00000258730	1.7432	up
0.951121	-15.8527	4.3056	-3.68187	0.000231525	0.0180993	ENSG00000271811	1.74234	down
121.627	1.44921	0.393566	3.68226	0.000231172	0.0180993	ENSG00000263956	1.74234	up
769.682	0.645536	0.17531	3.68225	0.000231187	0.0180993	ENSG00000176542	1.74234	unchanged
1660.19	0.489251	0.133023	3.67795	0.000235114	0.0183394	ENSG00000172071	1.73662	unchanged
1.22332	-15.8507	4.31339	-3.67475	0.000238079	0.01853	ENSG00000290882	1.73212	down
1.43463	-15.975	4.3496	-3.67275	0.000239952	0.0186349	ENSG00000184302	1.72967	down
1.53691	-15.9757	4.3564	-3.66718	0.000245242	0.0189515	ENSG00000250673	1.72236	down
1.11183	-15.8247	4.3157	-3.66677	0.000245631	0.0189515	ENSG00000070808	1.72236	down
1746.31	-0.451851	0.123203	-3.66755	0.00024489	0.0189515	ENSG00000101335	1.72236	unchanged
3437.66	-0.620516	0.169312	-3.66493	0.000247408	0.0190472	ENSG00000099994	1.72017	unchanged
1.25584	-15.9621	4.35703	-3.66354	0.000248755	0.0190725	ENSG00000229385	1.71959	down
9.21991	-6.03696	1.64788	-3.66348	0.000248811	0.0190725	ENSG00000287544	1.71959	down
1.20204	-15.7951	4.31469	-3.66078	0.000251451	0.0192013	ENSG00000283683	1.71667	down
0.945659	-15.7946	4.31469	-3.66065	0.000251573	0.0192013	ENSG00000196131	1.71667	down
1.06697	-15.7706	4.31324	-3.65632	0.000255859	0.0194032	ENSG00000273449	1.71213	down
52.397	-1.71628	0.469345	-3.65676	0.000255423	0.0194032	ENSG00000286705	1.71213	down
1.06697	-15.7706	4.31324	-3.65632	0.000255859	0.0194032	ENSG00000217026	1.71213	down
16690	-0.33681	0.0921444	-3.65524	0.000256942	0.0194185	ENSG00000166557	1.71178	unchanged
5569.29	-0.367794	0.100627	-3.65503	0.000257155	0.0194185	ENSG00000198356	1.71178	unchanged
2.14632	-15.3241	4.19333	-3.6544	0.000257781	0.0194244	ENSG00000279778	1.71165	down
627.313	1.22975	0.336708	3.65228	0.000259927	0.0195446	ENSG00000140853	1.70897	up
3297.37	0.363747	0.0996303	3.65097	0.000261251	0.0195613	ENSG00000165943	1.7086	unchanged
1571.02	0.458922	0.125687	3.65131	0.000260908	0.0195613	ENSG00000132623	1.7086	unchanged
1.51771	-15.7425	4.31355	-3.64955	0.0002627	0.0196284	ENSG00000234174	1.70711	down
18097.1	-0.353111	0.0967964	-3.64797	0.00026432	0.019708	ENSG00000143774	1.70536	unchanged
6139.57	-0.510471	0.140039	-3.64521	0.000267169	0.019837	ENSG00000183648	1.70252	unchanged
199.782	-0.913611	0.250612	-3.64552	0.000266847	0.019837	ENSG00000275183	1.70252	unchanged
0.954881	-15.7178	4.31601	-3.64175	0.000270789	0.0200638	ENSG00000273584	1.69759	down
13.9168	-5.74472	1.57786	-3.64084	0.000271753	0.0200933	ENSG00000280381	1.69695	down
0.869933	-15.6579	4.30774	-3.63482	0.00027817	0.020525	ENSG00000256079	1.68772	down
544.01	-0.634874	0.174713	-3.6338	0.000279277	0.0205639	ENSG00000111341	1.68689	unchanged
6524.26	0.393767	0.108378	3.63326	0.000279858	0.020564	ENSG00000140105	1.68689	unchanged
23816.9	-0.531562	0.146421	-3.63038	0.00028301	0.0207099	ENSG00000155368	1.68382	unchanged
0.819614	-15.6837	4.31981	-3.63065	0.000282708	0.0207099	ENSG00000213659	1.68382	down
1.51349	-15.1016	4.16244	-3.62808	0.00028554	0.0207666	ENSG00000251676	1.68263	down
0.492458	-15.7184	4.33226	-3.62821	0.000285394	0.0207666	ENSG00000236607	1.68263	down
0.492458	-15.7184	4.33226	-3.62821	0.000285394	0.0207666	ENSG00000258450	1.68263	down
5899.81	-0.4433	0.122431	-3.62081	0.000293688	0.0213155	ENSG00000136235	1.6713	unchanged
1.12489	-15.6292	4.31739	-3.62005	0.000294541	0.0213338	ENSG00000176857	1.67093	down
0.737026	-15.5957	4.31981	-3.61029	0.000305859	0.0221084	ENSG00000232903	1.65544	down
6083.88	-0.466731	0.129324	-3.609	0.000307382	0.0221734	ENSG00000221983	1.65417	unchanged
2162.82	-0.443149	0.122938	-3.60464	0.000312588	0.0225032	ENSG00000138639	1.64776	unchanged
2.45397	-15.5968	4.33396	-3.59874	0.000319762	0.022973	ENSG00000235440	1.63878	down
4153.81	0.397993	0.11062	3.59784	0.000320868	0.0230059	ENSG00000054983	1.63816	unchanged
1.40918	-15.5686	4.32835	-3.59689	0.000322039	0.0230433	ENSG00000235140	1.63746	down
1135.36	0.549972	0.153041	3.59361	0.000326122	0.0232885	ENSG00000102921	1.63286	unchanged
0.738604	-15.5213	4.32116	-3.59194	0.000328225	0.0233634	ENSG00000217527	1.63146	down
7462.68	-0.549211	0.15291	-3.59173	0.000328488	0.0233634	ENSG00000182117	1.63146	unchanged
0.96063	-15.5026	4.31858	-3.58975	0.000330998	0.023448	ENSG00000270377	1.62989	down
0.483282	-15.6994	4.37333	-3.58981	0.000330914	0.023448	ENSG00000260796	1.62989	down
674.007	0.679694	0.189431	3.58808	0.000333124	0.0235516	ENSG00000174652	1.62798	unchanged
0.770425	-15.4944	4.31996	-3.58669	0.000334905	0.0236304	ENSG00000253431	1.62653	down
0.738687	-15.4784	4.32065	-3.58242	0.000340426	0.0239724	ENSG00000260382	1.62029	down
1013.82	-0.567391	0.158576	-3.57805	0.000346174	0.0243288	ENSG00000142227	1.61388	unchanged
4681.03	-0.344261	0.0962496	-3.57676	0.000347885	0.0243542	ENSG00000197982	1.61343	unchanged
9939.66	-0.497481	0.139088	-3.57674	0.000347908	0.0243542	ENSG00000156411	1.61343	unchanged
4546.36	0.384305	0.10749	3.57528	0.000349857	0.0243944	ENSG00000196141	1.61271	unchanged
663.305	-1.04388	0.291971	-3.57528	0.000349854	0.0243944	ENSG00000262406	1.61271	down
3017.52	0.411285	0.115065	3.57437	0.000351077	0.0244315	ENSG00000187164	1.61205	unchanged
0.709244	-15.426	4.32041	-3.57049	0.000356309	0.0246859	ENSG00000226324	1.60755	down
6954.66	-0.361405	0.101227	-3.57024	0.000356649	0.0246859	ENSG00000175416	1.60755	unchanged
0.725412	-15.4255	4.32071	-3.57012	0.000356819	0.0246859	ENSG00000274751	1.60755	down
0.555433	-15.4661	4.33677	-3.56626	0.000362116	0.0250036	ENSG00000251880	1.602	down
8190.7	-0.407317	0.114235	-3.56562	0.000362998	0.0250159	ENSG00000141429	1.60178	unchanged
1.09553	-15.3915	4.31865	-3.56395	0.000365319	0.025127	ENSG00000257657	1.59986	down
0.884461	-15.4034	4.32297	-3.56314	0.000366445	0.0251557	ENSG00000286782	1.59936	down
11516.8	-0.539155	0.151519	-3.55833	0.000373217	0.0255711	ENSG00000118181	1.59225	unchanged
1.33081	-15.4879	4.35459	-3.55668	0.000375569	0.0256827	ENSG00000236977	1.59036	down
1346.29	0.857473	0.241159	3.55563	0.000377073	0.0257359	ENSG00000133106	1.58946	unchanged
210.758	-1.07381	0.30221	-3.55321	0.000380564	0.0259099	ENSG00000123892	1.58653	down
1.74603	-15.5171	4.36788	-3.55255	0.00038151	0.0259099	ENSG00000166682	1.58653	down
0.783507	-15.347	4.32025	-3.55235	0.000381812	0.0259099	ENSG00000268992	1.58653	down
3609.81	0.699711	0.197282	3.54675	0.000390017	0.0264162	ENSG00000221963	1.57813	unchanged
2738.55	-0.520118	0.146776	-3.54361	0.000394689	0.026585	ENSG00000117318	1.57536	unchanged
0.656888	-15.39	4.34307	-3.54356	0.000394756	0.026585	ENSG00000213215	1.57536	down
0.656888	-15.39	4.34307	-3.54356	0.000394756	0.026585	ENSG00000229206	1.57536	down
0.510006	-15.3939	4.34584	-3.54221	0.00039679	0.0266714	ENSG00000227215	1.57395	down
2083.88	0.487589	0.137706	3.54078	0.000398939	0.0267651	ENSG00000084676	1.57243	unchanged
12.2915	5.96508	1.68515	3.5398	0.000400427	0.0268142	ENSG00000111262	1.57163	up
8196.96	-0.477732	0.134991	-3.539	0.00040165	0.0268455	ENSG00000156467	1.57113	unchanged
2503.11	0.615651	0.17405	3.5372	0.000404391	0.0269779	ENSG00000140464	1.56899	unchanged
646.442	0.581806	0.164593	3.5348	0.000408079	0.0271729	ENSG00000125355	1.56586	unchanged
8676.47	-0.546609	0.154817	-3.53069	0.000414482	0.0275475	ENSG00000162244	1.55992	unchanged
0.886793	-15.2516	4.32267	-3.52828	0.000418271	0.0277342	ENSG00000186105	1.55698	down
0.656639	-15.2542	4.32387	-3.52791	0.000418853	0.0277342	ENSG00000251203	1.55698	down
0.686183	-15.2646	4.32932	-3.52587	0.000422094	0.0278967	ENSG00000231782	1.55445	down
122.73	-0.969969	0.275194	-3.52468	0.000424001	0.0279707	ENSG00000166578	1.5533	unchanged
42273.4	-0.390642	0.110849	-3.52409	0.000424944	0.0279808	ENSG00000196262	1.55314	unchanged
6225.96	-0.514168	0.145927	-3.52345	0.000425963	0.0279961	ENSG00000142676	1.5529	unchanged
0.635796	-15.2286	4.32549	-3.52067	0.000430452	0.0281347	ENSG00000234553	1.55076	down
0.635796	-15.2286	4.32549	-3.52067	0.000430452	0.0281347	ENSG00000256166	1.55076	down
1.09339	-15.2167	4.3212	-3.52141	0.000429254	0.0281347	ENSG00000214043	1.55076	down
791.312	0.788086	0.223879	3.52015	0.000431303	0.0281386	ENSG00000177409	1.5507	unchanged
0.698831	-15.215	4.32449	-3.51834	0.000434249	0.0281754	ENSG00000065371	1.55013	down
1547.94	-0.460542	0.130894	-3.51845	0.000434077	0.0281754	ENSG00000196104	1.55013	unchanged
1952.35	0.415142	0.117963	3.51925	0.000432773	0.0281754	ENSG00000179941	1.55013	unchanged
5646.18	-0.383107	0.108921	-3.51728	0.000435995	0.0282371	ENSG00000159199	1.54918	unchanged
0.40666	15.4936	4.40736	3.51539	0.000439101	0.0283864	ENSG00000225739	1.54689	up
0.806347	-15.2122	4.3291	-3.51395	0.0004415	0.0284881	ENSG00000260190	1.54534	down
0.693712	-15.1899	4.32331	-3.51348	0.000442279	0.0284881	ENSG00000255693	1.54534	down
4131.7	-0.274057	0.0781462	-3.50698	0.00045323	0.0291406	ENSG00000171223	1.5355	unchanged
1081.25	0.969076	0.276635	3.50309	0.000459902	0.0293909	ENSG00000117228	1.53179	unchanged
2.21732	15.0656	4.30105	3.50278	0.000460437	0.0293909	ENSG00000289788	1.53179	up
0.719225	-15.153	4.32466	-3.50385	0.000458577	0.0293909	ENSG00000233646	1.53179	down
217.602	-0.841596	0.240246	-3.50305	0.000459956	0.0293909	ENSG00000087884	1.53179	unchanged
13.3385	6.77728	1.93629	3.50014	0.000465008	0.0295234	ENSG00000184845	1.52983	up
0.51458	-15.2316	4.35105	-3.50068	0.00046408	0.0295234	ENSG00000206848	1.52983	down
1.21312	-15.1426	4.32579	-3.50054	0.000464318	0.0295234	ENSG00000176970	1.52983	down
15306.4	-0.406932	0.1163	-3.49899	0.000467026	0.0295986	ENSG00000108298	1.52873	unchanged
8475.15	-0.488711	0.139901	-3.49327	0.000477145	0.0301149	ENSG00000214253	1.52122	unchanged
0.655691	-15.1085	4.32541	-3.49295	0.000477718	0.0301149	ENSG00000233924	1.52122	down
0.655691	-15.1085	4.32541	-3.49295	0.000477718	0.0301149	ENSG00000259258	1.52122	down
1.03217	-15.2123	4.36175	-3.48767	0.000487247	0.03052	ENSG00000201003	1.51541	down
0.581564	-15.09	4.32747	-3.48701	0.000488445	0.03052	ENSG00000213587	1.51541	down
890.604	-0.586497	0.168174	-3.48744	0.000487674	0.03052	ENSG00000164687	1.51541	unchanged
0.581564	-15.09	4.32747	-3.48701	0.000488445	0.03052	ENSG00000285971	1.51541	down
1717.85	-0.351155	0.100695	-3.48731	0.0004879	0.03052	ENSG00000158792	1.51541	unchanged
0.606328	-15.0796	4.32767	-3.48445	0.000493142	0.030562	ENSG00000200959	1.51482	down
668.377	1.03181	0.296132	3.4843	0.000493421	0.030562	ENSG00000010030	1.51482	up
24953.8	-0.501236	0.143826	-3.48501	0.000492116	0.030562	ENSG00000112695	1.51482	unchanged
1.05773	-15.1211	4.33847	-3.48534	0.000491507	0.030562	ENSG00000121075	1.51482	down
1.03335	15.3008	4.38925	3.48597	0.000490347	0.030562	ENSG00000275401	1.51482	up
17494.7	-0.490768	0.140931	-3.48232	0.000497081	0.0307104	ENSG00000143947	1.51271	unchanged
1327.98	0.810285	0.232702	3.48207	0.000497549	0.0307104	ENSG00000185507	1.51271	unchanged
236.85	-1.09006	0.313151	-3.48096	0.000499624	0.030785	ENSG00000158578	1.51166	down
124.109	-1.49651	0.429995	-3.48029	0.000500878	0.0308087	ENSG00000130592	1.51133	down
0.637093	-15.0506	4.32606	-3.47906	0.000503185	0.0308437	ENSG00000286994	1.51083	down
0.637093	-15.0506	4.32606	-3.47906	0.000503185	0.0308437	ENSG00000275467	1.51083	down
689.035	0.705565	0.202853	3.47821	0.000504765	0.0308873	ENSG00000128908	1.51022	unchanged
0.724215	-15.0588	4.3301	-3.4777	0.000505733	0.0308932	ENSG00000228995	1.51014	down
672.319	-0.755528	0.217403	-3.47524	0.000510388	0.031124	ENSG00000111186	1.5069	unchanged
0.603916	-15.0333	4.32766	-3.47378	0.000513181	0.0311872	ENSG00000241231	1.50602	down
0.603916	-15.0333	4.32766	-3.47378	0.000513181	0.0311872	ENSG00000279463	1.50602	down
1.31395	15.2383	4.38873	3.47214	0.000516328	0.0312628	ENSG00000288860	1.50497	up
1.01954	-15.1477	4.36316	-3.47173	0.000517109	0.0312628	ENSG00000136918	1.50497	down
4558.28	-0.533139	0.153539	-3.47233	0.000515963	0.0312628	ENSG00000150779	1.50497	unchanged
0.522338	-15.0337	4.33119	-3.47103	0.000518461	0.0312628	ENSG00000280190	1.50497	down
0.564892	-15.0478	4.33548	-3.47084	0.00051883	0.0312628	ENSG00000231412	1.50497	down
17999.3	-0.362093	0.104388	-3.46874	0.000522903	0.0314133	ENSG00000116288	1.50289	unchanged
4102.54	-0.460402	0.132733	-3.46864	0.000523098	0.0314133	ENSG00000091640	1.50289	unchanged
0.57459	-15.0005	4.32853	-3.4655	0.000529254	0.0317293	ENSG00000215973	1.49854	down
17755.2	-0.552647	0.159556	-3.46365	0.000532898	0.03185	ENSG00000231500	1.49689	unchanged
973.428	-0.53474	0.15439	-3.46357	0.000533063	0.03185	ENSG00000109083	1.49689	unchanged
2169.7	0.415238	0.119958	3.46154	0.000537094	0.032037	ENSG00000157500	1.49435	unchanged
248.89	-0.801573	0.231662	-3.4601	0.000539979	0.032155	ENSG00000198542	1.49275	unchanged
1212.87	0.638099	0.184607	3.45654	0.000547167	0.0325285	ENSG00000124120	1.48774	unchanged
359.18	0.995112	0.287969	3.45562	0.000549027	0.0325337	ENSG00000147459	1.48767	unchanged
688.526	0.554271	0.160398	3.45559	0.000549088	0.0325337	ENSG00000099810	1.48767	unchanged
1955.32	0.377277	0.109195	3.45508	0.000550121	0.0325406	ENSG00000149532	1.48757	unchanged
5775.63	-0.380171	0.110127	-3.45211	0.00055622	0.0328466	ENSG00000089009	1.48351	unchanged
0.513617	-14.9492	4.33118	-3.45153	0.000557417	0.0328626	ENSG00000290611	1.4833	down
0.493988	-14.9447	4.33158	-3.45016	0.000560246	0.0328656	ENSG00000252622	1.48326	down
0.493988	-14.9447	4.33158	-3.45016	0.000560246	0.0328656	ENSG00000141371	1.48326	down
271.964	-1.02517	0.297106	-3.45051	0.000559527	0.0328656	ENSG00000197766	1.48326	down
10358.4	0.334157	0.0969368	3.44717	0.000566496	0.0331227	ENSG00000112308	1.47987	unchanged
0.677507	-14.9671	4.34171	-3.44727	0.000566282	0.0331227	ENSG00000232828	1.47987	down
301970	0.302962	0.0879166	3.44601	0.000568923	0.0332099	ENSG00000118271	1.47873	unchanged
1675.85	-0.472016	0.137096	-3.44295	0.000575402	0.0332392	ENSG00000254685	1.47835	unchanged
0.658597	-15.002	4.35638	-3.44368	0.000573852	0.0332392	ENSG00000243313	1.47835	down
17169.4	-0.493839	0.143434	-3.44298	0.00057534	0.0332392	ENSG00000079689	1.47835	unchanged
0.554961	-14.9005	4.32818	-3.44268	0.00057598	0.0332392	ENSG00000285231	1.47835	down
1051.35	0.489901	0.142297	3.44281	0.000575706	0.0332392	ENSG00000006831	1.47835	unchanged
0.549322	-14.9047	4.32651	-3.44496	0.000571136	0.0332392	ENSG00000256571	1.47835	down
0.554961	-14.9005	4.32818	-3.44268	0.00057598	0.0332392	ENSG00000288605	1.47835	down
1796.61	0.431766	0.125549	3.43902	0.00058382	0.0336369	ENSG00000104419	1.47318	unchanged
1.43235	-14.9713	4.35609	-3.43686	0.000588497	0.0337421	ENSG00000234796	1.47183	down
3518.79	-0.525507	0.152902	-3.43689	0.000588424	0.0337421	ENSG00000120509	1.47183	unchanged
0.758855	-14.8824	4.32962	-3.43735	0.000587434	0.0337421	ENSG00000250267	1.47183	down
2008.42	0.479078	0.139454	3.43539	0.000591709	0.0338715	ENSG00000143493	1.47017	unchanged
0.811337	-14.9068	4.34056	-3.4343	0.000594088	0.0339529	ENSG00000220695	1.46912	down
365.708	0.719283	0.209595	3.43178	0.000599645	0.0342154	ENSG00000123191	1.46578	unchanged
917.257	-0.527001	0.153625	-3.43044	0.000602607	0.0343293	ENSG00000117594	1.46434	unchanged
579.46	-0.559215	0.163047	-3.42977	0.000604085	0.0343583	ENSG00000106538	1.46397	unchanged
0.80326	-14.884	4.34131	-3.42847	0.000607	0.0344138	ENSG00000231666	1.46327	down
8430.9	-0.462664	0.134944	-3.42857	0.00060677	0.0344138	ENSG00000143977	1.46327	unchanged
9480.9	-0.477462	0.13932	-3.42709	0.000610087	0.0345096	ENSG00000173915	1.46206	unchanged
7556.87	-0.532925	0.155521	-3.42671	0.000610948	0.0345096	ENSG00000131469	1.46206	unchanged
1663.38	-0.54878	0.160162	-3.42641	0.000611608	0.0345096	ENSG00000241837	1.46206	unchanged
0.572929	-14.8123	4.32756	-3.42279	0.00061983	0.034918	ENSG00000135898	1.45695	down
4152.4	0.298687	0.0872817	3.42211	0.000621373	0.0349495	ENSG00000124226	1.45656	unchanged
4007.73	0.341011	0.099678	3.42113	0.000623626	0.0350208	ENSG00000180957	1.45567	unchanged
1.31296	-14.8659	4.34783	-3.41916	0.000628141	0.0352185	ENSG00000285955	1.45323	down
0.599802	-14.8105	4.33297	-3.41809	0.000630616	0.0353016	ENSG00000171936	1.45221	down
398.642	-0.91834	0.268704	-3.41766	0.000631624	0.0353023	ENSG00000137868	1.4522	unchanged
2095.12	-0.777735	0.227694	-3.4157	0.000636182	0.0353345	ENSG00000163220	1.4518	unchanged
5444.88	-0.294762	0.0862905	-3.41592	0.000635665	0.0353345	ENSG00000173113	1.4518	unchanged
0.500245	-14.8685	4.35224	-3.4163	0.000634785	0.0353345	ENSG00000199568	1.4518	down
0.737839	-14.9061	4.3626	-3.41679	0.000633641	0.0353345	ENSG00000241067	1.4518	down
6956.89	-0.445438	0.130477	-3.41392	0.000640351	0.0355104	ENSG00000169976	1.44964	unchanged
0.524279	-14.7843	4.33487	-3.41056	0.000648299	0.0357835	ENSG00000231817	1.44632	down
0.524279	-14.7843	4.33487	-3.41056	0.000648299	0.0357835	ENSG00000213876	1.44632	down
0.524279	-14.7843	4.33487	-3.41056	0.000648299	0.0357835	ENSG00000290058	1.44632	down
3636.24	-0.361741	0.106269	-3.40402	0.000664023	0.0362249	ENSG00000172428	1.44099	unchanged
7844.07	-0.498465	0.146514	-3.40216	0.000668544	0.0362249	ENSG00000138495	1.44099	unchanged
0.827618	-14.825	4.35174	-3.40669	0.000657562	0.0362249	ENSG00000288969	1.44099	down
0.434594	-14.7644	4.33946	-3.40236	0.000668058	0.0362249	ENSG00000240423	1.44099	down
0.434594	-14.7644	4.33946	-3.40236	0.000668058	0.0362249	ENSG00000287775	1.44099	down
0.559952	-14.7477	4.3331	-3.40349	0.000665318	0.0362249	ENSG00000202392	1.44099	down
0.517198	-14.7585	4.33534	-3.40423	0.000663517	0.0362249	ENSG00000236627	1.44099	down
4597.46	0.781707	0.229739	3.40258	0.000667529	0.0362249	ENSG00000168394	1.44099	unchanged
0.517198	-14.7585	4.33534	-3.40423	0.000663517	0.0362249	ENSG00000229543	1.44099	down
13145.1	-0.308091	0.0905391	-3.40285	0.000666864	0.0362249	ENSG00000089157	1.44099	unchanged
0.565896	-14.7544	4.33231	-3.40566	0.000660044	0.0362249	ENSG00000237646	1.44099	down
0.565896	-14.7544	4.33231	-3.40566	0.000660044	0.0362249	ENSG00000180509	1.44099	down
1.07947	-14.7541	4.33779	-3.4013	0.00067066	0.0362841	ENSG00000074771	1.44028	down
40.2174	-1.94703	0.572533	-3.40072	0.000672083	0.0362966	ENSG00000181291	1.44013	down
991.615	0.437627	0.1287	3.40037	0.000672936	0.0362966	ENSG00000160208	1.44013	unchanged
0.93257	-14.8296	4.3631	-3.39888	0.000676625	0.0364402	ENSG00000251414	1.43842	down
0.433001	-14.7406	4.33825	-3.39781	0.000679265	0.0365269	ENSG00000251001	1.43739	down
0.491434	-14.781	4.35351	-3.39518	0.000685829	0.0367963	ENSG00000256609	1.4342	down
6611.42	-0.481915	0.141949	-3.39498	0.000686346	0.0367963	ENSG00000184983	1.4342	unchanged
880.518	-0.634087	0.186798	-3.3945	0.000687536	0.0368044	ENSG00000248144	1.4341	unchanged
0.41041	-14.7179	4.34004	-3.39118	0.00069592	0.037163	ENSG00000233747	1.42989	down
0.514121	-14.6962	4.3349	-3.3902	0.000698423	0.037163	ENSG00000279107	1.42989	down
0.418926	-14.8487	4.37966	-3.39037	0.000697989	0.037163	ENSG00000238447	1.42989	down
0.514121	-14.6962	4.3349	-3.3902	0.000698423	0.037163	ENSG00000243370	1.42989	down
0.432543	-14.7042	4.33889	-3.38893	0.000701657	0.0371679	ENSG00000221216	1.42983	down
0.432543	-14.7042	4.33889	-3.38893	0.000701657	0.0371679	ENSG00000254810	1.42983	down
2272.63	-0.471102	0.139001	-3.38919	0.000700998	0.0371679	ENSG00000225663	1.42983	unchanged
0.564942	-14.7097	4.34418	-3.38608	0.000708991	0.0374446	ENSG00000287791	1.42661	down
1260.37	-0.424992	0.125499	-3.3864	0.000708149	0.0374446	ENSG00000100028	1.42661	unchanged
4798.44	-0.509715	0.150706	-3.38218	0.000719143	0.0379244	ENSG00000167772	1.42108	unchanged
2.07186	-14.7537	4.36412	-3.38069	0.000723046	0.0380736	ENSG00000172940	1.41938	down
17920.7	-0.501813	0.14846	-3.38014	0.000724497	0.0380935	ENSG00000129562	1.41915	unchanged
0.752244	-14.6546	4.34056	-3.37619	0.00073496	0.0385865	ENSG00000180818	1.41356	down
6684.36	-0.47802	0.141662	-3.37436	0.000739869	0.0387868	ENSG00000125995	1.41132	unchanged
6607.96	-0.411279	0.121951	-3.37249	0.000744928	0.0389945	ENSG00000114942	1.409	unchanged
261.691	1.69848	0.504094	3.36937	0.000753408	0.0393803	ENSG00000134569	1.40472	up
2081.77	-0.406649	0.120773	-3.36706	0.000759735	0.0394207	ENSG00000128581	1.40428	unchanged
1.05909	-14.6727	4.35759	-3.36716	0.000759475	0.0394207	ENSG00000253111	1.40428	down
4561.32	-0.437388	0.129895	-3.36723	0.000759264	0.0394207	ENSG00000149806	1.40428	unchanged
0.757818	-14.6241	4.34138	-3.36853	0.000755693	0.0394207	ENSG00000259151	1.40428	down
12055	-0.512964	0.152336	-3.36731	0.00075904	0.0394207	ENSG00000125743	1.40428	unchanged
2226.23	0.461254	0.137166	3.36273	0.000771749	0.0399856	ENSG00000111371	1.3981	unchanged
2845.43	-0.295379	0.0878701	-3.36155	0.000775068	0.040099	ENSG00000100142	1.39687	unchanged
0.492625	-14.6048	4.34665	-3.36001	0.000779401	0.0402645	ENSG00000271021	1.39508	down
1466.34	1.384	0.4121	3.35841	0.000783918	0.040439	ENSG00000137965	1.3932	up
14.9942	3.09571	0.921914	3.35792	0.000785311	0.040452	ENSG00000278989	1.39306	up
4510.74	-0.510408	0.152172	-3.35416	0.000796068	0.0409468	ENSG00000179271	1.38778	unchanged
972.022	-0.480946	0.143417	-3.35349	0.000798001	0.0409867	ENSG00000114767	1.38736	unchanged
48580.5	-0.32327	0.0964293	-3.3524	0.000801146	0.0410888	ENSG00000111669	1.38628	unchanged
8554.79	-0.396651	0.118334	-3.35197	0.000802386	0.041093	ENSG00000103363	1.38623	unchanged
15507.1	-0.480258	0.143389	-3.34934	0.000810039	0.0414252	ENSG00000135046	1.38274	unchanged
4827.07	-0.410503	0.122657	-3.34675	0.000817644	0.0414788	ENSG00000063660	1.38217	unchanged
0.48281	-14.5475	4.34629	-3.34712	0.000816572	0.0414788	ENSG00000160683	1.38217	down
9909.07	1.37512	0.4109	3.3466	0.000818099	0.0414788	ENSG00000185745	1.38217	up
0.48281	-14.5475	4.34629	-3.34712	0.000816572	0.0414788	ENSG00000266079	1.38217	down
10444.9	0.326258	0.097442	3.34823	0.000813307	0.0414788	ENSG00000074695	1.38217	unchanged
0.48281	-14.5475	4.34629	-3.34712	0.000816572	0.0414788	ENSG00000235914	1.38217	down
3215.34	0.437997	0.130942	3.34498	0.000822878	0.0416616	ENSG00000153561	1.38026	unchanged
700.245	-0.672121	0.201095	-3.34231	0.000830856	0.0420056	ENSG00000183150	1.37669	unchanged
1387.26	0.967804	0.289932	3.33803	0.000843732	0.0425958	ENSG00000182179	1.37063	unchanged
16587.7	-0.405302	0.121452	-3.33714	0.000846464	0.0426731	ENSG00000103260	1.36985	unchanged
1120.53	0.441107	0.132226	3.336	0.000849931	0.0427871	ENSG00000066855	1.36869	unchanged
5230.18	-0.418134	0.125398	-3.33446	0.00085465	0.0429637	ENSG00000125968	1.3669	unchanged
100.87	1.48408	0.445175	3.3337	0.000856995	0.0430207	ENSG00000069122	1.36632	up
224.148	-1.33615	0.401009	-3.33197	0.000862342	0.043228	ENSG00000134955	1.36424	down
16425.9	-0.398292	0.119558	-3.33138	0.000864161	0.043258	ENSG00000140264	1.36393	unchanged
389.897	0.946618	0.284198	3.33084	0.00086584	0.043281	ENSG00000168404	1.3637	unchanged
0.492417	-14.5559	4.37185	-3.32946	0.000870151	0.0434354	ENSG00000182814	1.36216	down
332.656	-0.814775	0.244755	-3.32894	0.000871759	0.0434545	ENSG00000222041	1.36197	unchanged
0.610436	-14.549	4.37327	-3.3268	0.000878485	0.0437284	ENSG00000223324	1.35924	down
124.707	-1.57763	0.474393	-3.32557	0.000882393	0.0438	ENSG00000182870	1.35853	down
289.479	-0.717471	0.215728	-3.32581	0.00088162	0.0438	ENSG00000229833	1.35853	unchanged
0.506821	-14.4433	4.34505	-3.32407	0.000887138	0.043974	ENSG00000271709	1.3568	down
5035.43	-0.452672	0.136339	-3.3202	0.000899534	0.0445263	ENSG00000188186	1.35138	unchanged
6406.25	-0.487779	0.146937	-3.31964	0.000901346	0.0445538	ENSG00000111639	1.35111	unchanged
7067.23	-0.505879	0.15251	-3.31702	0.000909818	0.0449101	ENSG00000144713	1.34766	unchanged
1013.51	0.396268	0.119519	3.31553	0.000914695	0.0450881	ENSG00000109118	1.34594	unchanged
0.432416	-14.4096	4.34903	-3.3133	0.000922034	0.0452397	ENSG00000236928	1.34448	down
0.432416	-14.4096	4.34903	-3.3133	0.000922034	0.0452397	ENSG00000233760	1.34448	down
0.432416	-14.4096	4.34903	-3.3133	0.000922034	0.0452397	ENSG00000226447	1.34448	down
486.033	0.502251	0.151598	3.31304	0.00092287	0.0452397	ENSG00000107443	1.34448	unchanged
17950.4	-0.451429	0.136318	-3.3116	0.000927645	0.0453485	ENSG00000169567	1.34344	unchanged
0.4761	-14.3916	4.3454	-3.31192	0.000926581	0.0453485	ENSG00000277425	1.34344	down
6130.84	-0.34875	0.105352	-3.31032	0.000931909	0.0454943	ENSG00000163041	1.34204	unchanged
0.410493	-14.3949	4.34969	-3.30941	0.000934912	0.0455783	ENSG00000207142	1.34124	down
2225.44	0.419808	0.126914	3.30782	0.000940236	0.0457749	ENSG00000198894	1.33937	unchanged
111.567	1.19987	0.363017	3.30528	0.000948826	0.0461299	ENSG00000144893	1.33602	up
9.95735	4.14664	1.255	3.30411	0.000952782	0.0462588	ENSG00000261889	1.33481	up
31728.1	-0.444562	0.134566	-3.30367	0.000954275	0.046268	ENSG00000166562	1.33472	unchanged
2706.95	-0.357768	0.108347	-3.30204	0.000959842	0.0464111	ENSG00000143314	1.33338	unchanged
4571.26	-0.361337	0.109422	-3.30224	0.000959146	0.0464111	ENSG00000100284	1.33338	unchanged
0.661531	-14.485	4.38765	-3.30132	0.000962324	0.0464678	ENSG00000259336	1.33285	down
35536	-0.416243	0.126114	-3.30053	0.000965031	0.0464721	ENSG00000117410	1.33281	unchanged
1930.02	-0.409227	0.123974	-3.3009	0.000963744	0.0464721	ENSG00000033011	1.33281	unchanged
0.784061	-14.374	4.35911	-3.29747	0.000975588	0.0469168	ENSG00000276704	1.32867	down
3551.43	-0.41142	0.124841	-3.29555	0.000982291	0.0471752	ENSG00000090013	1.32629	unchanged
1632.44	-0.446643	0.135617	-3.29341	0.000989796	0.0474714	ENSG00000161544	1.32357	unchanged
284.794	-0.665325	0.202051	-3.29286	0.000991755	0.0475012	ENSG00000272288	1.3233	unchanged
1237.13	-0.468576	0.142322	-3.29236	0.000993519	0.0475216	ENSG00000167291	1.32311	unchanged
5837.95	-0.46401	0.140953	-3.29194	0.000994971	0.0475269	ENSG00000150787	1.32306	unchanged
8.98867	-5.77998	1.75662	-3.29041	0.00100043	0.0476592	ENSG00000114248	1.32185	down
801.889	-0.617001	0.187495	-3.29075	0.000999193	0.0476592	ENSG00000137507	1.32185	unchanged
4631.85	0.355045	0.107938	3.28935	0.00100419	0.0477742	ENSG00000123240	1.32081	unchanged
2981.49	0.568771	0.173004	3.28762	0.00101039	0.0480048	ENSG00000067066	1.31872	unchanged
6657.67	-0.425353	0.129449	-3.28588	0.00101665	0.0482378	ENSG00000136942	1.31661	unchanged
3365.99	-0.397332	0.120939	-3.28539	0.00101841	0.048257	ENSG00000156256	1.31644	unchanged
889.24	-0.457512	0.139298	-3.28442	0.00102193	0.0483592	ENSG00000105771	1.31552	unchanged
2.75459	-13.1711	4.0132	-3.28194	0.00103094	0.0487206	ENSG00000274536	1.31229	down
728.344	-0.753516	0.230009	-3.27602	0.0010528	0.0496874	ENSG00000198829	1.30375	unchanged
159.627	-0.802924	0.24517	-3.27497	0.00105673	0.0498068	ENSG00000124140	1.30271	unchanged
2360.97	-0.442026	0.135011	-3.27401	0.00106033	0.0498083	ENSG00000163882	1.3027	unchanged
0.484698	-14.229	4.34628	-3.27384	0.00106097	0.0498083	ENSG00000267079	1.3027	down
1922.67	-0.444167	0.135665	-3.27399	0.00106041	0.0498083	ENSG00000130332	1.3027	unchanged
44369.6	-0.259368	0.0792544	-3.2726	0.00106564	0.0499613	ENSG00000100316	1.30137	unchanged
1.69161	-14.1883	4.33627	-3.272	0.00106791	0.0500014	ENSG00000142319	1.30102	unchanged
5034	-0.507251	0.15507	-3.2711	0.00107131	0.0500945	ENSG00000178449	1.30021	unchanged
10067.8	-0.528221	0.161514	-3.27043	0.00107386	0.0501476	ENSG00000164825	1.29975	unchanged
1512.67	0.534663	0.163539	3.26933	0.00107803	0.0502763	ENSG00000181045	1.29864	unchanged
10664.5	0.305407	0.0934727	3.26734	0.00108564	0.0505647	ENSG00000185559	1.29615	unchanged
333.663	-1.09231	0.334393	-3.26655	0.00108868	0.0506402	ENSG00000128591	1.2955	unchanged
821.327	-0.60284	0.184632	-3.2651	0.00109427	0.0508335	ENSG00000213694	1.29385	unchanged
1783.6	0.717465	0.219775	3.26454	0.00109641	0.0508664	ENSG00000106785	1.29357	unchanged
3816.01	-0.394147	0.120767	-3.26369	0.00109973	0.0509538	ENSG00000167515	1.29282	unchanged
240.636	1.04846	0.32137	3.26248	0.00110443	0.0511029	ENSG00000138376	1.29155	unchanged
1063.59	0.555406	0.170259	3.26212	0.00110583	0.0511029	ENSG00000174197	1.29155	unchanged
1454.67	0.464241	0.14241	3.25988	0.0011146	0.0513742	ENSG00000164190	1.28925	unchanged
198.178	-1.49844	0.459626	-3.26013	0.00111362	0.0513742	ENSG00000185567	1.28925	unchanged
7429.17	-0.417894	0.128269	-3.25795	0.00112218	0.0516569	ENSG00000111775	1.28687	unchanged
627.078	0.574016	0.176412	3.25385	0.00113854	0.0522903	ENSG00000109610	1.28158	unchanged
2360.97	0.38772	0.119161	3.25376	0.00113889	0.0522903	ENSG00000135250	1.28158	unchanged
1164.03	0.513044	0.157704	3.25321	0.00114109	0.0523236	ENSG00000047188	1.2813	unchanged
1108.11	-0.497236	0.152869	-3.25269	0.00114319	0.0523522	ENSG00000180257	1.28106	unchanged
1.08083	-14.2151	4.3713	-3.25191	0.00114634	0.0523615	ENSG00000187144	1.28099	unchanged
913.013	-0.610913	0.187858	-3.252	0.00114597	0.0523615	ENSG00000184635	1.28099	unchanged
11350.4	-0.378174	0.116442	-3.24775	0.00116322	0.0530643	ENSG00000006327	1.2752	unchanged
10148	-0.384192	0.118395	-3.24502	0.00117444	0.0532358	ENSG00000112175	1.2738	unchanged
2821.46	-0.31106	0.0958688	-3.24464	0.00117598	0.0532358	ENSG00000126768	1.2738	unchanged
7408.59	-0.480262	0.147951	-3.2461	0.00116999	0.0532358	ENSG00000104368	1.2738	unchanged
1241.37	-0.589499	0.181646	-3.24532	0.00117317	0.0532358	ENSG00000173530	1.2738	unchanged
13.468	-5.44443	1.67769	-3.2452	0.00117368	0.0532358	ENSG00000267934	1.2738	unchanged
14599	-0.309911	0.0955074	-3.24489	0.00117497	0.0532358	ENSG00000142156	1.2738	unchanged
3182.11	-0.48033	0.148081	-3.2437	0.00117987	0.0532887	ENSG00000106367	1.27336	unchanged
5702.47	-0.382005	0.117771	-3.24363	0.00118016	0.0532887	ENSG00000122884	1.27336	unchanged
0.899404	-14.2053	4.38359	-3.24057	0.0011929	0.0536594	ENSG00000274356	1.27035	unchanged
0.821378	-14.1808	4.37584	-3.2407	0.00119236	0.0536594	ENSG00000239701	1.27035	unchanged
1.18142	-14.1176	4.35635	-3.24069	0.00119242	0.0536594	ENSG00000261559	1.27035	unchanged
5965.81	-0.482511	0.148998	-3.23837	0.00120217	0.0540078	ENSG00000173660	1.26754	unchanged
144.41	0.992824	0.306693	3.23719	0.00120714	0.0541628	ENSG00000232160	1.2663	unchanged
53.357	-2.62104	0.809902	-3.23625	0.00121112	0.0542725	ENSG00000166813	1.26542	unchanged
48277.3	-0.483631	0.149483	-3.23536	0.0012149	0.0543731	ENSG00000150991	1.26462	unchanged
3407.39	-0.409673	0.126702	-3.23336	0.00122345	0.0546869	ENSG00000119471	1.26212	unchanged
669.814	-0.57501	0.177958	-3.23115	0.00123293	0.0550414	ENSG00000176920	1.25931	unchanged
21281.3	-0.339191	0.105022	-3.22971	0.00123915	0.055118	ENSG00000163453	1.25871	unchanged
32.8904	-2.17509	0.67347	-3.22968	0.0012393	0.055118	ENSG00000203930	1.25871	unchanged
216.679	-0.71018	0.219877	-3.22989	0.00123836	0.055118	ENSG00000259781	1.25871	unchanged
1442.86	0.422342	0.130788	3.22921	0.00124133	0.0551392	ENSG00000140854	1.25854	unchanged
48.2849	1.99019	0.616392	3.22877	0.00124326	0.0551555	ENSG00000196242	1.25841	unchanged
343.059	0.855951	0.265135	3.22836	0.00124504	0.0551657	ENSG00000162924	1.25833	unchanged
15640	-0.460582	0.142831	-3.22467	0.00126116	0.0558103	ENSG00000138085	1.25329	unchanged
0.903567	14.1498	4.39028	3.22297	0.00126867	0.0560727	ENSG00000290421	1.25125	unchanged
1700.37	-0.436601	0.135553	-3.2209	0.0012779	0.0564106	ENSG00000126458	1.24864	unchanged
10790.1	-0.437359	0.136108	-3.21333	0.00131205	0.0578458	ENSG00000143575	1.23773	unchanged
18.3049	5.90175	1.83714	3.21247	0.00131599	0.0579478	ENSG00000290727	1.23696	unchanged
6843.32	-0.265037	0.0825459	-3.21078	0.00132375	0.0582169	ENSG00000141349	1.23495	unchanged
27577.7	0.260017	0.0810124	3.2096	0.0013292	0.0583846	ENSG00000108946	1.2337	unchanged
18539.7	-0.510588	0.159227	-3.20666	0.00134285	0.058911	ENSG00000127184	1.2298	unchanged
3452.4	0.353088	0.110147	3.2056	0.00134781	0.0590559	ENSG00000149218	1.22874	unchanged
1277	-0.397791	0.124149	-3.20415	0.00135463	0.0592813	ENSG00000171311	1.22708	unchanged
0.965067	-13.9644	4.36308	-3.20059	0.00137146	0.0599441	ENSG00000274124	1.22225	unchanged
4296.92	-0.360044	0.112548	-3.19903	0.00137892	0.0601961	ENSG00000233927	1.22043	unchanged
160.481	1.0931	0.341745	3.19859	0.00138101	0.0602129	ENSG00000198945	1.22031	unchanged
7850.82	-0.318664	0.0996975	-3.19631	0.00139196	0.060616	ENSG00000114115	1.21741	unchanged
2203.95	-0.354837	0.111064	-3.19489	0.00139883	0.0608406	ENSG00000128626	1.21581	unchanged
4814.5	-0.391726	0.12278	-3.19047	0.00142041	0.0617035	ENSG00000129255	1.20969	unchanged
1833.5	-0.375971	0.117882	-3.18938	0.00142576	0.0618603	ENSG00000198768	1.20859	unchanged
156.831	1.18173	0.37109	3.18448	0.00145013	0.0628406	ENSG00000128510	1.20176	unchanged
3023.28	-0.446514	0.140358	-3.18125	0.00146643	0.0633718	ENSG00000116962	1.1981	unchanged
3964.13	0.300429	0.0944452	3.18099	0.00146774	0.0633718	ENSG00000198478	1.1981	unchanged
2585.17	-0.430072	0.135191	-3.18123	0.00146651	0.0633718	ENSG00000127540	1.1981	unchanged
8521.4	-0.384706	0.120954	-3.1806	0.00146973	0.0633804	ENSG00000083845	1.19804	unchanged
10.16	6.41083	2.01723	3.17804	0.00148275	0.0638645	ENSG00000138395	1.19474	unchanged
0.489217	-13.9785	4.40152	-3.17584	0.00149404	0.0642727	ENSG00000215049	1.19197	unchanged
1136.36	0.549567	0.173119	3.17451	0.00150092	0.0644904	ENSG00000170500	1.1905	unchanged
424.699	0.715181	0.225643	3.16952	0.00152692	0.0649783	ENSG00000162636	1.18723	unchanged
58558.1	-0.243651	0.0768416	-3.17082	0.0015201	0.0649783	ENSG00000124762	1.18723	unchanged
4010.42	0.408367	0.12877	3.17129	0.00151765	0.0649783	ENSG00000148175	1.18723	unchanged
1.73149	13.938	4.39563	3.17088	0.00151975	0.0649783	ENSG00000255299	1.18723	unchanged
1026.46	-0.491985	0.155124	-3.17155	0.00151627	0.0649783	ENSG00000182050	1.18723	unchanged
10940.6	-0.307132	0.0968863	-3.17003	0.00152426	0.0649783	ENSG00000183978	1.18723	unchanged
89.0645	1.18944	0.375187	3.17026	0.00152303	0.0649783	ENSG00000279253	1.18723	unchanged
541.565	-0.54471	0.171857	-3.16955	0.00152677	0.0649783	ENSG00000177096	1.18723	unchanged
2353.94	-0.384657	0.121416	-3.16809	0.00153441	0.065219	ENSG00000164654	1.18563	unchanged
4142.36	0.500656	0.158161	3.16548	0.00154825	0.0657285	ENSG00000079385	1.18225	unchanged
23765.8	-0.388902	0.122913	-3.16403	0.00155599	0.0659782	ENSG00000197956	1.1806	unchanged
4335.31	0.401287	0.126855	3.16334	0.00155968	0.0660556	ENSG00000172292	1.18009	unchanged
171997	-0.361109	0.114225	-3.16139	0.00157019	0.0663424	ENSG00000115414	1.17821	unchanged
2317.48	-0.408938	0.129343	-3.16166	0.00156872	0.0663424	ENSG00000107872	1.17821	unchanged
8.80272	-6.30895	1.99603	-3.16076	0.00157359	0.0664072	ENSG00000197472	1.17778	unchanged
2758.13	0.498413	0.157863	3.15726	0.00159261	0.0671298	ENSG00000165219	1.17308	unchanged
2.65707	-13.0235	4.12613	-3.15634	0.00159763	0.0672616	ENSG00000235049	1.17223	unchanged
2602.28	0.31061	0.0985049	3.15324	0.00161468	0.0678987	ENSG00000125952	1.16814	unchanged
699.737	-0.596057	0.189095	-3.15216	0.00162069	0.0680708	ENSG00000144935	1.16704	unchanged
3319.76	-0.342243	0.108638	-3.15031	0.00163098	0.0684222	ENSG00000086504	1.1648	unchanged
16675.9	-0.345238	0.109769	-3.14513	0.00166012	0.0695624	ENSG00000137154	1.15763	unchanged
1001.66	0.509271	0.161975	3.14414	0.00166577	0.0697168	ENSG00000144712	1.15666	unchanged
4351.25	0.365976	0.11648	3.14197	0.00167815	0.0701521	ENSG00000141232	1.15396	unchanged
0.416567	-13.8419	4.40736	-3.14064	0.0016858	0.0702876	ENSG00000225080	1.15312	unchanged
573.155	-0.533798	0.169982	-3.14032	0.00168764	0.0702876	ENSG00000115350	1.15312	unchanged
2225.66	-0.432244	0.137629	-3.14066	0.00168568	0.0702876	ENSG00000186468	1.15312	unchanged
1632.96	-0.56796	0.180877	-3.14003	0.00168931	0.0702876	ENSG00000140092	1.15312	unchanged
406.229	-0.595127	0.189634	-3.1383	0.00169933	0.0706216	ENSG00000211450	1.15106	unchanged
0.401622	-13.7334	4.3799	-3.13555	0.00171533	0.0711199	ENSG00000241490	1.14801	unchanged
0.401622	-13.7334	4.3799	-3.13555	0.00171533	0.0711199	ENSG00000251788	1.14801	unchanged
2749.37	-0.398519	0.127177	-3.13358	0.00172691	0.0715165	ENSG00000187051	1.14559	unchanged
43.8026	-3.3486	1.06915	-3.13202	0.00173609	0.0718131	ENSG00000140470	1.1438	unchanged
503.6	-0.61497	0.196385	-3.13145	0.00173946	0.0718208	ENSG00000161970	1.14375	unchanged
605.878	0.598326	0.191079	3.1313	0.00174033	0.0718208	ENSG00000196967	1.14375	unchanged
914.492	-0.786205	0.251176	-3.13009	0.00174751	0.0720336	ENSG00000163736	1.14246	unchanged
6456.27	1.02019	0.326112	3.12835	0.00175793	0.0722953	ENSG00000160932	1.14089	unchanged
0.676396	-13.662	4.36692	-3.12852	0.00175691	0.0722953	ENSG00000290166	1.14089	unchanged
3644.13	-0.443807	0.141918	-3.1272	0.00176479	0.0724375	ENSG00000084072	1.14004	unchanged
10591.5	-0.46395	0.148365	-3.12709	0.00176547	0.0724375	ENSG00000189043	1.14004	unchanged
1122.26	0.455702	0.145854	3.12436	0.0017819	0.0730178	ENSG00000138231	1.13657	unchanged
3209.9	-0.405594	0.129829	-3.12406	0.00178373	0.0730178	ENSG00000137210	1.13657	unchanged
118.56	-1.19106	0.381316	-3.12355	0.00178684	0.0730594	ENSG00000226791	1.13632	unchanged
2615.85	-0.356705	0.114211	-3.12322	0.00178886	0.0730594	ENSG00000176014	1.13632	unchanged
1996.73	-0.526395	0.168581	-3.1225	0.00179323	0.0730728	ENSG00000171202	1.13624	unchanged
1222.8	-0.518118	0.165931	-3.12249	0.00179331	0.0730728	ENSG00000129824	1.13624	unchanged
2402.54	-0.349374	0.112008	-3.11918	0.00181355	0.0738127	ENSG00000129968	1.13187	unchanged
9.05485	-4.91841	1.57778	-3.11729	0.00182522	0.0742025	ENSG00000239218	1.12958	unchanged
2469.62	0.396657	0.127343	3.11486	0.00184032	0.0747309	ENSG00000163898	1.1265	unchanged
2525.34	-0.385809	0.123884	-3.11429	0.00184388	0.0747898	ENSG00000113638	1.12616	unchanged
909.676	0.864403	0.277698	3.11274	0.00185356	0.0750202	ENSG00000145703	1.12482	unchanged
1.1452	-13.6432	4.38308	-3.11271	0.00185379	0.0750202	ENSG00000276842	1.12482	unchanged
14630.8	-0.480802	0.154539	-3.11119	0.00186333	0.0753206	ENSG00000131174	1.12309	unchanged
10.5456	5.63515	1.8116	3.11058	0.00186718	0.0753816	ENSG00000235770	1.12273	unchanged
2449.3	-0.297354	0.0956034	-3.11028	0.00186909	0.0753816	ENSG00000204308	1.12273	unchanged
1.13155	-13.5743	4.36495	-3.10984	0.00187187	0.075408	ENSG00000253197	1.12258	unchanged
41.4705	-2.77288	0.89194	-3.10882	0.00187838	0.0755847	ENSG00000198237	1.12157	unchanged
0.804686	-13.5698	4.36572	-3.10827	0.00188186	0.075639	ENSG00000243290	1.12125	unchanged
220.136	1.01036	0.325119	3.10767	0.0018857	0.0757072	ENSG00000173597	1.12086	unchanged
6.01949	-6.24017	2.00856	-3.10678	0.00189136	0.0758487	ENSG00000288997	1.12005	unchanged
6389.76	-0.300268	0.0966629	-3.10634	0.00189417	0.0758758	ENSG00000149257	1.1199	unchanged
2839.48	0.279984	0.0901614	3.10536	0.00190045	0.0760417	ENSG00000116977	1.11895	unchanged
1409.4	-0.366067	0.117979	-3.10281	0.00191693	0.0766145	ENSG00000182492	1.11569	unchanged
2619.27	-0.388468	0.125221	-3.10225	0.00192053	0.076672	ENSG00000142552	1.11536	unchanged
454.199	-0.520982	0.168008	-3.10094	0.00192905	0.0769258	ENSG00000118520	1.11393	unchanged
5188.8	0.314314	0.101437	3.09863	0.00194419	0.0774426	ENSG00000132640	1.11102	unchanged
1674.34	-0.54019	0.174374	-3.09788	0.00194908	0.0775117	ENSG00000169020	1.11063	unchanged
9.4094	5.25993	1.69801	3.0977	0.0019503	0.0775117	ENSG00000174171	1.11063	unchanged
9484.78	-0.420654	0.135815	-3.09725	0.00195326	0.0775427	ENSG00000163682	1.11046	unchanged
33.5249	-3.67224	1.18663	-3.09468	0.00197028	0.0781309	ENSG00000177098	1.10718	unchanged
1230.38	0.549118	0.177482	3.09394	0.00197516	0.0782372	ENSG00000176463	1.10659	unchanged
2551.7	0.377301	0.121978	3.0932	0.00198013	0.0783465	ENSG00000135679	1.10598	unchanged
137.8	-0.937249	0.303087	-3.09235	0.0019858	0.0784835	ENSG00000112137	1.10522	unchanged
7432.53	-0.38704	0.125193	-3.09155	0.00199115	0.0786073	ENSG00000134291	1.10454	unchanged
704.417	0.860923	0.278513	3.09114	0.00199387	0.078627	ENSG00000196684	1.10443	unchanged
14457.9	-0.296	0.0957807	-3.0904	0.0019989	0.0787378	ENSG00000165272	1.10382	unchanged
3823.98	-0.404154	0.130794	-3.09002	0.00200145	0.0787512	ENSG00000168268	1.10374	unchanged
410.155	0.644698	0.208783	3.08788	0.00201588	0.0789099	ENSG00000156966	1.10287	unchanged
1267.89	-0.601655	0.19478	-3.0889	0.00200902	0.0789099	ENSG00000144810	1.10287	unchanged
115.169	-1.18669	0.384278	-3.08811	0.00201432	0.0789099	ENSG00000189320	1.10287	unchanged
16661.8	-0.247178	0.0800301	-3.08856	0.00201126	0.0789099	ENSG00000149273	1.10287	unchanged
9763.89	-0.439076	0.142198	-3.08778	0.0020166	0.0789099	ENSG00000198258	1.10287	unchanged
3770.67	0.398874	0.129217	3.08685	0.00202287	0.0789811	ENSG00000197971	1.10248	unchanged
451.363	0.655995	0.2125	3.08704	0.00202163	0.0789811	ENSG00000130856	1.10248	unchanged
1374.96	-0.37443	0.121319	-3.08632	0.00202651	0.0790361	ENSG00000174807	1.10217	unchanged
4540.08	-0.305138	0.0988911	-3.0856	0.00203144	0.0791414	ENSG00000106400	1.1016	unchanged
9351.58	-0.373652	0.121157	-3.08403	0.00204219	0.0794729	ENSG00000133112	1.09978	unchanged
9302.68	-0.275149	0.0892339	-3.08345	0.00204613	0.0795331	ENSG00000158864	1.09945	unchanged
41.5056	-2.28833	0.742278	-3.08285	0.00205026	0.0795331	ENSG00000287985	1.09945	unchanged
1942.92	0.381205	0.123655	3.08282	0.00205046	0.0795331	ENSG00000176105	1.09945	unchanged
1726.86	0.577649	0.187527	3.08034	0.00206763	0.0801115	ENSG00000105270	1.09631	unchanged
9073.15	-0.476924	0.155249	-3.07199	0.00212635	0.0822968	ENSG00000196139	1.08462	unchanged
68.6701	-1.3901	0.452588	-3.07145	0.00213023	0.0823574	ENSG00000179715	1.0843	unchanged
32713.8	0.545762	0.177786	3.06978	0.00214219	0.0826011	ENSG00000234745	1.08301	unchanged
1875.04	-0.557879	0.181734	-3.06976	0.00214234	0.0826011	ENSG00000109846	1.08301	unchanged
34260	-0.415174	0.135254	-3.06959	0.00214352	0.0826011	ENSG00000211459	1.08301	unchanged
1.15316	-13.5165	4.40736	-3.0668	0.00216364	0.083286	ENSG00000260021	1.07943	unchanged
311.317	-0.814274	0.265599	-3.0658	0.00217088	0.0834691	ENSG00000149571	1.07847	unchanged
27515.7	-0.424831	0.138585	-3.0655	0.0021731	0.0834691	ENSG00000140319	1.07847	unchanged
206.954	-0.845895	0.276127	-3.06343	0.00218815	0.0838106	ENSG00000138400	1.0767	unchanged
2193.99	0.275547	0.089951	3.0633	0.00218907	0.0838106	ENSG00000138385	1.0767	unchanged
161.346	-1.01482	0.331224	-3.06386	0.00218503	0.0838106	ENSG00000090924	1.0767	unchanged
1935.98	0.799768	0.261222	3.06164	0.00220125	0.084186	ENSG00000240065	1.07476	unchanged
783.143	0.498109	0.162738	3.06081	0.0022074	0.0842044	ENSG00000130775	1.07467	unchanged
2464.12	-0.322091	0.105221	-3.06109	0.00220536	0.0842044	ENSG00000160752	1.07467	unchanged
1324.45	0.545929	0.178372	3.06061	0.00220885	0.0842044	ENSG00000164284	1.07467	unchanged
2314.73	-0.468566	0.153113	-3.06026	0.00221148	0.0842143	ENSG00000167272	1.07461	unchanged
5294.66	-0.244192	0.0798434	-3.05838	0.00222533	0.084651	ENSG00000147123	1.07237	unchanged
1089.88	-0.476311	0.155849	-3.05624	0.00224133	0.085168	ENSG00000183696	1.06972	unchanged
1207.44	0.41208	0.134863	3.05554	0.00224657	0.0851848	ENSG00000119862	1.06964	unchanged
473.803	0.747572	0.24466	3.05556	0.0022464	0.0851848	ENSG00000146918	1.06964	unchanged
18464.4	-0.399608	0.130796	-3.0552	0.00224911	0.0851903	ENSG00000008018	1.06961	unchanged
0.666606	-13.4144	4.39227	-3.0541	0.00225739	0.0854128	ENSG00000231108	1.06848	unchanged
16316.3	0.330026	0.108076	3.05366	0.00226072	0.0854474	ENSG00000124783	1.0683	unchanged
10299.8	-0.446423	0.14623	-3.05289	0.0022665	0.0855749	ENSG00000164919	1.06765	unchanged
4594.34	-0.47746	0.156569	-3.04953	0.00229201	0.0864461	ENSG00000185608	1.06325	unchanged
1788.16	-0.480144	0.157493	-3.04867	0.00229855	0.0866008	ENSG00000269893	1.06248	unchanged
46.4426	1.45689	0.47801	3.04783	0.00230501	0.086752	ENSG00000141497	1.06172	unchanged
86908.8	-0.505197	0.165797	-3.04709	0.00231068	0.0868734	ENSG00000124107	1.06111	unchanged
875.52	-0.435385	0.143006	-3.04453	0.00233046	0.0875241	ENSG00000179761	1.05787	unchanged
0.616749	-13.3165	4.37436	-3.0442	0.00233297	0.0875258	ENSG00000289986	1.05786	unchanged
0.488745	-13.3975	4.40274	-3.043	0.00234233	0.0876193	ENSG00000244619	1.0574	unchanged
6874.51	-0.315933	0.103833	-3.0427	0.00234465	0.0876193	ENSG00000197756	1.0574	unchanged
5642.45	-0.401835	0.132034	-3.04341	0.00233915	0.0876193	ENSG00000138772	1.0574	unchanged
1810.74	-0.5012	0.164727	-3.04261	0.00234534	0.0876193	ENSG00000183036	1.0574	unchanged
0.735844	-13.284	4.36696	-3.04193	0.00235064	0.0877251	ENSG00000237737	1.05688	unchanged
1956.12	-0.477302	0.157008	-3.03999	0.00236584	0.0881998	ENSG00000169740	1.05453	unchanged
2133.97	-0.453411	0.1492	-3.03895	0.00237402	0.0883191	ENSG00000167700	1.05395	unchanged
1.07372	-13.3374	4.3888	-3.03897	0.0023739	0.0883191	ENSG00000290660	1.05395	unchanged
4588.28	0.303853	0.10001	3.03824	0.00237961	0.0884343	ENSG00000168743	1.05338	unchanged
21.4102	1.95611	0.644793	3.03369	0.00241579	0.0894976	ENSG00000285646	1.04819	unchanged
2039.69	-0.400561	0.132037	-3.0337	0.00241576	0.0894976	ENSG00000188010	1.04819	unchanged
9565.56	-0.466654	0.15381	-3.03397	0.00241361	0.0894976	ENSG00000110700	1.04819	unchanged
322.246	0.967647	0.319052	3.03288	0.00242232	0.0895526	ENSG00000079335	1.04792	unchanged
3346.63	-0.322039	0.106179	-3.03298	0.00242154	0.0895526	ENSG00000057663	1.04792	unchanged
1696.26	-0.308628	0.101798	-3.03177	0.00243127	0.0896967	ENSG00000067221	1.04722	unchanged
1.41051	-13.3217	4.39368	-3.03202	0.00242925	0.0896967	ENSG00000161405	1.04722	unchanged
40.2442	2.18269	0.720764	3.02831	0.00245928	0.0906357	ENSG00000051341	1.0427	unchanged
17483.7	-0.302061	0.0997933	-3.02686	0.00247106	0.0909756	ENSG00000106153	1.04107	unchanged
1149.33	-0.484571	0.160143	-3.02588	0.00247915	0.0911786	ENSG00000168569	1.04011	unchanged
1167.01	-0.49432	0.163412	-3.02498	0.00248646	0.0913528	ENSG00000100410	1.03928	unchanged
1.15474	-13.2753	4.38914	-3.02457	0.00248986	0.0913833	ENSG00000274105	1.03913	unchanged
41.1388	-2.47289	0.817929	-3.02335	0.0024999	0.0916569	ENSG00000164047	1.03783	unchanged
1582.91	-0.362995	0.12009	-3.02269	0.00250538	0.091763	ENSG00000116157	1.03733	unchanged
8906.57	-0.339698	0.112409	-3.02198	0.00251125	0.0918831	ENSG00000165916	1.03676	unchanged
1525.26	0.702234	0.232402	3.02163	0.00251415	0.0918946	ENSG00000076555	1.03671	unchanged
3072.97	0.318421	0.105402	3.021	0.00251939	0.0919913	ENSG00000100485	1.03625	unchanged
1426.79	0.668781	0.221461	3.01986	0.00252895	0.0921509	ENSG00000198734	1.0355	unchanged
7872.94	1.33759	0.442927	3.01989	0.00252868	0.0921509	ENSG00000119922	1.0355	unchanged
4830.37	-0.356904	0.118309	-3.01671	0.00255535	0.0930175	ENSG00000000003	1.03144	unchanged
1481.11	-0.397815	0.131959	-3.01468	0.00257249	0.0935454	ENSG00000053372	1.02898	unchanged
4119.36	0.364294	0.120858	3.01422	0.00257638	0.0935908	ENSG00000102699	1.02877	unchanged
2250.36	-0.489684	0.162647	-3.01071	0.00260638	0.0945839	ENSG00000198918	1.02418	unchanged
0.580671	-13.1634	4.37324	-3.00999	0.00261256	0.0946318	ENSG00000225401	1.02396	unchanged
1275.55	-0.364704	0.121167	-3.00994	0.00261303	0.0946318	ENSG00000182518	1.02396	unchanged
1746.6	-0.329631	0.109575	-3.00826	0.00262748	0.0950578	ENSG00000153002	1.02201	unchanged
138.017	-1.05647	0.35129	-3.0074	0.00263494	0.0950929	ENSG00000196205	1.02185	unchanged
834.672	0.553838	0.184169	3.00722	0.00263648	0.0950929	ENSG00000166405	1.02185	unchanged
3388.02	0.387215	0.128757	3.00733	0.00263552	0.0950929	ENSG00000170581	1.02185	unchanged
4675.45	0.298547	0.0993098	3.00622	0.00264515	0.0953088	ENSG00000151893	1.02087	unchanged
724.895	0.545329	0.181449	3.00541	0.00265226	0.095468	ENSG00000106346	1.02014	unchanged
2507.62	-0.38545	0.128296	-3.00438	0.00266127	0.0956951	ENSG00000187634	1.01911	unchanged
114.167	-1.23156	0.40998	-3.00396	0.00266492	0.0957293	ENSG00000139540	1.01896	unchanged
478.784	0.548626	0.182753	3.00201	0.002682	0.0962457	ENSG00000166169	1.01662	unchanged
485.48	0.722205	0.240738	2.99997	0.0027001	0.0967974	ENSG00000070371	1.01414	unchanged
1075.84	0.631561	0.210605	2.99879	0.00271054	0.0970735	ENSG00000156030	1.0129	unchanged
6925.16	-0.458924	0.153111	-2.99733	0.00272354	0.0974405	ENSG00000127922	1.01126	unchanged
129.04	1.86087	0.62134	2.99494	0.00274499	0.0981093	ENSG00000100626	1.00829	unchanged
275.292	-0.675496	0.225631	-2.99382	0.00275511	0.098372	ENSG00000162643	1.00713	unchanged
7146.45	-0.402176	0.134352	-2.99345	0.00275845	0.0983921	ENSG00000136930	1.00704	unchanged
1040.6	-0.477677	0.15961	-2.99277	0.0027646	0.0985125	ENSG00000139233	1.00651	unchanged
10121.5	-0.400063	0.13378	-2.99044	0.00278571	0.0988677	ENSG00000115233	1.00495	unchanged
4178.93	-0.40288	0.13471	-2.99073	0.00278311	0.0988677	ENSG00000130508	1.00495	unchanged
8039.99	-0.46159	0.154346	-2.99063	0.00278402	0.0988677	ENSG00000182899	1.00495	unchanged
2936.14	0.422061	0.141116	2.99088	0.00278179	0.0988677	ENSG00000113742	1.00495	unchanged
5401.26	-0.444729	0.148765	-2.98947	0.00279458	0.0988857	ENSG00000164934	1.00487	unchanged
1585.76	-0.421643	0.141023	-2.9899	0.00279072	0.0988857	ENSG00000172366	1.00487	unchanged
185983	-0.229875	0.0768936	-2.98952	0.00279418	0.0988857	ENSG00000087086	1.00487	unchanged
33701.5	-0.354158	0.118538	-2.98771	0.00281078	0.0993599	ENSG00000118680	1.00279	unchanged
3320.47	-0.396851	0.132846	-2.98731	0.00281445	0.0993905	ENSG00000151632	1.00266	unchanged
4149.89	-0.385917	0.12929	-2.98489	0.00283678	0.0999803	ENSG00000114023	1.00009	unchanged
15.1875	-3.43627	1.15111	-2.98519	0.00283407	0.0999803	ENSG00000171595	1.00009	unchanged
26923.9	-0.270848	0.0907633	-2.98412	0.00284399	0.100135	ENSG00000174748	0.999415	unchanged
2365.42	0.535737	0.179686	2.98151	0.0028683	0.100592	ENSG00000155363	0.997437	unchanged
3742.6	-0.393624	0.131989	-2.98224	0.00286149	0.100592	ENSG00000118246	0.997437	unchanged
808.797	0.571678	0.191703	2.9821	0.00286281	0.100592	ENSG00000118322	0.997437	unchanged
3780.29	0.374702	0.125665	2.98176	0.002866	0.100592	ENSG00000149658	0.997437	unchanged
351.709	-0.902797	0.303202	-2.97754	0.00290571	0.101803	ENSG00000169469	0.992239	unchanged
3468.66	0.492341	0.165451	2.97575	0.00292269	0.102297	ENSG00000134250	0.990136	unchanged
2469.19	0.272587	0.0916473	2.9743	0.00293656	0.102681	ENSG00000135968	0.988509	unchanged
11432.3	-0.253327	0.0852088	-2.97301	0.00294894	0.103013	ENSG00000160213	0.987109	unchanged
193.722	-0.757263	0.254795	-2.97205	0.0029582	0.103235	ENSG00000217442	0.986175	unchanged
871.711	0.463411	0.155945	2.97163	0.00296225	0.103274	ENSG00000284024	0.986007	unchanged
1514.66	0.329506	0.110948	2.9699	0.00297897	0.103755	ENSG00000101193	0.98399	unchanged
4.83121	5.39509	1.81729	2.96876	0.00299007	0.10404	ENSG00000228016	0.982801	unchanged
2678.73	0.548827	0.184955	2.96736	0.00300372	0.104412	ENSG00000196116	0.981248	unchanged
8742.68	-0.388603	0.131084	-2.96453	0.00303144	0.105273	ENSG00000161638	0.977683	unchanged
966.001	0.462713	0.156186	2.96258	0.00305075	0.10584	ENSG00000164181	0.975351	unchanged
114.69	0.987774	0.333467	2.96213	0.00305517	0.10589	ENSG00000272654	0.975147	unchanged
627.801	-0.626839	0.211752	-2.96025	0.00307394	0.106436	ENSG00000204711	0.97291	unchanged
3550.15	-0.472996	0.159829	-2.95938	0.00308261	0.106632	ENSG00000198242	0.972111	unchanged
119.395	0.869296	0.293818	2.95862	0.0030902	0.106791	ENSG00000188266	0.971466	unchanged
9904.14	-0.380777	0.128788	-2.95663	0.0031102	0.107378	ENSG00000143198	0.969086	unchanged
1911.34	-0.419532	0.141926	-2.95599	0.00311664	0.107396	ENSG00000136682	0.969012	unchanged
243.028	0.837553	0.283342	2.95598	0.00311679	0.107396	ENSG00000267002	0.969012	unchanged
70124.6	-0.409386	0.138515	-2.95554	0.00312126	0.107446	ENSG00000205542	0.96881	unchanged
3087.38	-0.421363	0.142583	-2.95521	0.0031246	0.107457	ENSG00000137038	0.968767	unchanged
1331.83	-0.336772	0.114017	-2.95371	0.00313981	0.107777	ENSG00000172663	0.967473	unchanged
4.28545	-6.03482	2.04315	-2.95369	0.00314	0.107777	ENSG00000161860	0.967473	unchanged
815.11	-0.533688	0.180792	-2.95194	0.00315782	0.108089	ENSG00000175324	0.966217	unchanged
13671.4	-0.458139	0.155194	-2.95204	0.00315682	0.108089	ENSG00000050130	0.966217	unchanged
2862.38	-0.264824	0.0897129	-2.9519	0.00315823	0.108089	ENSG00000277972	0.966217	unchanged
18.6473	2.79257	0.946206	2.95133	0.00316404	0.108184	ENSG00000162398	0.965838	unchanged
16926.1	-0.277733	0.0941473	-2.94998	0.00317793	0.108554	ENSG00000163468	0.964353	unchanged
552.634	0.727479	0.246813	2.94749	0.00320366	0.109014	ENSG00000178966	0.962519	unchanged
210.886	-0.770265	0.261289	-2.94794	0.00319898	0.109014	ENSG00000070985	0.962519	unchanged
22.7789	-2.17729	0.738634	-2.94773	0.0032012	0.109014	ENSG00000235100	0.962519	unchanged
3683.02	-0.466462	0.158247	-2.94769	0.00320159	0.109014	ENSG00000167863	0.962519	unchanged
8.51127	5.51993	1.87336	2.94654	0.00321347	0.109242	ENSG00000236098	0.961608	unchanged
5883.89	0.310305	0.105337	2.94582	0.00322096	0.109392	ENSG00000149177	0.961012	unchanged
1.36546	-12.8329	4.36256	-2.9416	0.00326526	0.110696	ENSG00000286324	0.955869	unchanged
1109.4	0.651435	0.221459	2.94157	0.00326557	0.110696	ENSG00000157625	0.955869	unchanged
20.7958	3.33336	1.13342	2.94097	0.00327183	0.110802	ENSG00000291208	0.955452	unchanged
1532.86	0.320485	0.109017	2.93976	0.00328466	0.11113	ENSG00000081019	0.954167	unchanged
1746.26	-0.438275	0.149113	-2.93922	0.00329043	0.11122	ENSG00000131495	0.953819	unchanged
3896.9	0.386948	0.131729	2.93746	0.0033091	0.111744	ENSG00000132912	0.951775	unchanged
2299.18	-0.459959	0.15678	-2.9338	0.00334844	0.112669	ENSG00000171421	0.948195	unchanged
29662.4	-0.425632	0.145076	-2.93386	0.00334774	0.112669	ENSG00000113732	0.948195	unchanged
6048.45	-0.287128	0.0978713	-2.93373	0.00334919	0.112669	ENSG00000141552	0.948195	unchanged
6251.56	-0.339604	0.115755	-2.93381	0.00334824	0.112669	ENSG00000100348	0.948195	unchanged
3321.57	-0.354611	0.121009	-2.93046	0.00338464	0.113646	ENSG00000146282	0.944445	unchanged
14384.2	0.33425	0.114055	2.93062	0.00338291	0.113646	ENSG00000102804	0.944445	unchanged
1130.82	-0.355746	0.121442	-2.92935	0.00339673	0.113945	ENSG00000156170	0.943306	unchanged
2763.41	-0.421531	0.144011	-2.92708	0.00342159	0.11467	ENSG00000242485	0.94055	unchanged
1412.6	-0.41486	0.141777	-2.92615	0.00343187	0.114906	ENSG00000119650	0.939656	unchanged
3709.87	0.37916	0.129606	2.92547	0.00343934	0.115048	ENSG00000082438	0.939122	unchanged
2990.61	-0.482866	0.16509	-2.92487	0.00344599	0.115161	ENSG00000105171	0.938693	unchanged
6265.98	-0.454401	0.155452	-2.92309	0.00346581	0.115606	ENSG00000196683	0.937019	unchanged
12.9902	-4.25581	1.45581	-2.92334	0.00346301	0.115606	ENSG00000278384	0.937019	unchanged
1275.17	0.621209	0.212628	2.92158	0.00348264	0.116058	ENSG00000104517	0.935323	unchanged
5.3198	-5.5342	1.89458	-2.92107	0.00348831	0.116138	ENSG00000257108	0.935024	unchanged
2771.1	-0.377514	0.129279	-2.92016	0.00349856	0.116371	ENSG00000103024	0.934157	unchanged
4408.68	-0.400682	0.137253	-2.9193	0.00350818	0.116472	ENSG00000134375	0.933777	unchanged
5500.07	-0.387658	0.132781	-2.91953	0.00350556	0.116472	ENSG00000008988	0.933777	unchanged
542.555	-0.490174	0.167955	-2.91849	0.0035173	0.116666	ENSG00000133315	0.933056	unchanged
713.524	-0.573159	0.196451	-2.91757	0.0035277	0.116902	ENSG00000164418	0.93218	unchanged
2312.01	-0.327934	0.112424	-2.91695	0.00353473	0.117025	ENSG00000183617	0.93172	unchanged
6644.24	-0.34048	0.116762	-2.91603	0.00354519	0.117172	ENSG00000142892	0.931175	unchanged
24.0023	3.92556	1.34623	2.91598	0.00354577	0.117172	ENSG00000223723	0.931175	unchanged
416.988	0.626019	0.214781	2.91469	0.0035604	0.117546	ENSG00000166402	0.929792	unchanged
3272.97	-0.4296	0.147439	-2.91374	0.00357125	0.117795	ENSG00000124733	0.928874	unchanged
745.659	0.436403	0.149797	2.91331	0.00357624	0.11785	ENSG00000166783	0.92867	unchanged
81.1121	-1.50881	0.518033	-2.91257	0.00358474	0.11802	ENSG00000121898	0.928043	unchanged
108.665	1.07657	0.369684	2.91213	0.00358977	0.118076	ENSG00000102349	0.927837	unchanged
713.3	-0.475701	0.163396	-2.91134	0.00359884	0.118208	ENSG00000153086	0.927354	unchanged
14577.7	0.550669	0.189155	2.9112	0.00360043	0.118208	ENSG00000142089	0.927354	unchanged
231.459	0.896534	0.308006	2.91077	0.00360543	0.118263	ENSG00000075213	0.927152	unchanged
2609.84	0.300897	0.103411	2.90971	0.00361762	0.118426	ENSG00000154822	0.926554	unchanged
1753.82	0.312359	0.107344	2.90989	0.00361552	0.118426	ENSG00000109911	0.926554	unchanged
13713.5	-0.337747	0.116085	-2.90947	0.00362041	0.118426	ENSG00000101182	0.926554	unchanged
1297.15	0.374456	0.128865	2.90581	0.00366298	0.119708	ENSG00000163602	0.921876	unchanged
835.091	-0.849771	0.292557	-2.90463	0.00367684	0.119987	ENSG00000196754	0.920867	unchanged
27592.3	-0.403867	0.139053	-2.9044	0.00367957	0.119987	ENSG00000198843	0.920867	unchanged
8365.16	-0.270539	0.0931537	-2.90422	0.00368165	0.119987	ENSG00000120725	0.920867	unchanged
986.737	-0.399913	0.137754	-2.90309	0.003695	0.120269	ENSG00000233276	0.919847	unchanged
826.925	0.688496	0.237184	2.9028	0.00369847	0.120269	ENSG00000144802	0.919847	unchanged
65.4606	-2.2419	0.772368	-2.90263	0.00370048	0.120269	ENSG00000204161	0.919847	unchanged
163.739	0.938396	0.323479	2.90095	0.00372037	0.120805	ENSG00000189350	0.917915	unchanged
41300.9	-0.266158	0.091765	-2.90043	0.00372647	0.120892	ENSG00000167552	0.917602	unchanged
340.086	-0.613378	0.211564	-2.89926	0.0037405	0.121236	ENSG00000196544	0.916367	unchanged
1809.33	0.374287	0.129187	2.89725	0.00376453	0.121733	ENSG00000113360	0.914591	unchanged
9799.94	-0.238661	0.082379	-2.89712	0.00376611	0.121733	ENSG00000147403	0.914591	unchanged
1915.58	-0.424371	0.146467	-2.89738	0.00376296	0.121733	ENSG00000102309	0.914591	unchanged
2375.45	-0.330248	0.114077	-2.89496	0.00379203	0.122459	ENSG00000179085	0.912008	unchanged
17887.9	-0.311968	0.107822	-2.89335	0.00381158	0.122979	ENSG00000100804	0.91017	unchanged
11327.1	0.235979	0.0815881	2.89232	0.00382413	0.123272	ENSG00000078018	0.909136	unchanged
3132.53	-0.472869	0.163612	-2.89018	0.00385026	0.124001	ENSG00000272047	0.906574	unchanged
2827.05	0.330289	0.114363	2.88808	0.00387602	0.124718	ENSG00000143157	0.904071	unchanged
19560	-0.352834	0.122193	-2.8875	0.00388316	0.124835	ENSG00000144746	0.903665	unchanged
24772.1	-0.423276	0.146616	-2.88696	0.00388984	0.124936	ENSG00000142168	0.903312	unchanged
1843.28	0.436522	0.151246	2.88617	0.00389966	0.125138	ENSG00000167037	0.90261	unchanged
6436.84	0.242049	0.0839549	2.88308	0.00393806	0.126142	ENSG00000159592	0.899139	unchanged
772.306	-0.491074	0.170327	-2.88313	0.00393746	0.126142	ENSG00000172602	0.899139	unchanged
12762.8	-0.410165	0.142319	-2.88201	0.00395146	0.126457	ENSG00000185088	0.898056	unchanged
1484.8	-0.556936	0.193506	-2.87813	0.00400042	0.127794	ENSG00000151093	0.89349	unchanged
763.124	0.510641	0.177416	2.87821	0.00399942	0.127794	ENSG00000130021	0.89349	unchanged
393.502	0.58477	0.20329	2.87653	0.0040207	0.128326	ENSG00000085276	0.891685	unchanged
916.48	0.734789	0.255677	2.8739	0.00405438	0.129169	ENSG00000204642	0.888842	unchanged
2148.5	-0.46938	0.163317	-2.87405	0.00405242	0.129169	ENSG00000165716	0.888842	unchanged
2591.2	0.427665	0.1489	2.87216	0.00407679	0.129766	ENSG00000188157	0.886838	unchanged
8241.92	-0.297751	0.103737	-2.87026	0.0041014	0.129967	ENSG00000163479	0.886167	unchanged
671.682	-0.613586	0.213766	-2.87036	0.00409999	0.129967	ENSG00000123689	0.886167	unchanged
8.99558	4.61539	1.60756	2.87105	0.00409105	0.129967	ENSG00000241218	0.886167	unchanged
63.2392	2.29653	0.799989	2.8707	0.00409564	0.129967	ENSG00000290588	0.886167	unchanged
1957.2	-0.364723	0.127046	-2.8708	0.00409433	0.129967	ENSG00000133641	0.886167	unchanged
1231.33	0.404523	0.140951	2.86995	0.00410533	0.129975	ENSG00000115421	0.886139	unchanged
2433.29	0.420338	0.146552	2.86819	0.00412823	0.130327	ENSG00000134324	0.884964	unchanged
1673.27	-0.439516	0.15322	-2.86853	0.00412381	0.130327	ENSG00000196290	0.884964	unchanged
15960.9	-0.41767	0.145601	-2.8686	0.00412294	0.130327	ENSG00000165629	0.884964	unchanged
2171.39	0.362072	0.126247	2.86797	0.00413114	0.130327	ENSG00000119638	0.884964	unchanged
0.588035	-12.5438	4.3746	-2.86742	0.00413834	0.130413	ENSG00000237329	0.88468	unchanged
1371.03	-0.430277	0.150076	-2.86706	0.00414298	0.130413	ENSG00000102317	0.88468	unchanged
1634.29	-0.356232	0.124268	-2.86664	0.00414854	0.130413	ENSG00000100263	0.88468	unchanged
95.4192	-1.21898	0.425219	-2.8667	0.00414774	0.130413	ENSG00000100146	0.88468	unchanged
2229.43	-0.302042	0.105453	-2.86424	0.00418017	0.131291	ENSG00000148450	0.881766	unchanged
2410.27	0.436176	0.152302	2.86389	0.00418472	0.131317	ENSG00000166471	0.881678	unchanged
3797.9	-0.298932	0.104398	-2.8634	0.00419122	0.131405	ENSG00000180992	0.881388	unchanged
4586.01	0.251609	0.087927	2.86156	0.00421558	0.132052	ENSG00000153113	0.879254	unchanged
1169.07	0.490079	0.171289	2.86113	0.00422137	0.132117	ENSG00000170085	0.879041	unchanged
595.981	-0.61155	0.213773	-2.86075	0.00422643	0.132159	ENSG00000278318	0.878904	unchanged
7100.05	-0.441613	0.15444	-2.85945	0.00424375	0.132584	ENSG00000168028	0.87751	unchanged
9.22631	-4.74327	1.65918	-2.8588	0.00425246	0.132599	ENSG00000280310	0.877459	unchanged
25248.2	-0.238908	0.0835615	-2.85907	0.0042488	0.132599	ENSG00000161011	0.877459	unchanged
17.9611	3.80726	1.33187	2.85858	0.00425546	0.132599	ENSG00000106327	0.877459	unchanged
1647.86	0.438062	0.153264	2.85822	0.00426019	0.13263	ENSG00000165443	0.877357	unchanged
1545.21	0.284556	0.0995987	2.85703	0.00427625	0.133013	ENSG00000108179	0.876105	unchanged
9700.13	-0.328524	0.115024	-2.85613	0.00428845	0.133276	ENSG00000117448	0.875248	unchanged
264.908	-0.724371	0.253653	-2.85576	0.00429337	0.133312	ENSG00000149380	0.875129	unchanged
380.708	0.694518	0.243269	2.85494	0.00430451	0.133541	ENSG00000170775	0.874384	unchanged
830.753	-0.542652	0.190255	-2.85224	0.00434127	0.134564	ENSG00000162755	0.87107	unchanged
708.262	-0.560282	0.196555	-2.85051	0.00436485	0.135177	ENSG00000152147	0.869097	unchanged
14162.9	0.373435	0.131095	2.84857	0.00439162	0.135888	ENSG00000145632	0.86682	unchanged
482.885	0.488661	0.171638	2.84704	0.00441277	0.136423	ENSG00000235711	0.865112	unchanged
2879.48	-0.39177	0.137622	-2.8467	0.00441744	0.136448	ENSG00000111906	0.865032	unchanged
6456.07	-0.242276	0.0852008	-2.84359	0.00446087	0.13767	ENSG00000004059	0.86116	unchanged
1552.36	0.408579	0.1437	2.84327	0.00446529	0.137687	ENSG00000135966	0.861107	unchanged
2816.2	0.361846	0.127295	2.84257	0.00447521	0.137873	ENSG00000150768	0.860521	unchanged
23.9499	3.13009	1.10126	2.84229	0.00447913	0.137874	ENSG00000220008	0.860517	unchanged
4339.43	-0.325895	0.114703	-2.84121	0.00449434	0.138222	ENSG00000159674	0.859422	unchanged
1643.07	0.429972	0.151373	2.84048	0.0045045	0.138415	ENSG00000153814	0.858817	unchanged
585.491	-0.589609	0.207621	-2.83984	0.00451366	0.138503	ENSG00000233834	0.858542	unchanged
927.693	-0.422209	0.148679	-2.83973	0.00451516	0.138503	ENSG00000157045	0.858542	unchanged
6871.29	0.315566	0.111138	2.8394	0.00451981	0.138526	ENSG00000106723	0.85847	unchanged
0.687412	-12.4613	4.39079	-2.83805	0.00453906	0.138996	ENSG00000289953	0.856999	unchanged
2936.37	0.261505	0.0921676	2.83727	0.00455006	0.139204	ENSG00000111596	0.856349	unchanged
454.683	-0.639382	0.225371	-2.83702	0.00455371	0.139204	ENSG00000167562	0.856349	unchanged
3086.44	-0.366551	0.129273	-2.83548	0.00457565	0.139634	ENSG00000065621	0.855009	unchanged
7672.9	-0.235242	0.0829614	-2.83556	0.00457453	0.139634	ENSG00000168209	0.855009	unchanged
20159.3	-0.336965	0.118938	-2.83311	0.00460974	0.140554	ENSG00000163466	0.852158	unchanged
293.094	-0.800948	0.282801	-2.8322	0.00462295	0.140835	ENSG00000182575	0.851288	unchanged
1850.04	0.410656	0.145019	2.83173	0.00462966	0.140919	ENSG00000173575	0.851032	unchanged
1923.57	-0.371438	0.131193	-2.83125	0.00463671	0.141013	ENSG00000117308	0.850742	unchanged
3829.13	0.272514	0.0962842	2.83031	0.00465025	0.141303	ENSG00000146278	0.849848	unchanged
1.06999	-12.4204	4.39046	-2.82896	0.00466999	0.141782	ENSG00000233756	0.84838	unchanged
3400.59	-0.384558	0.135988	-2.82788	0.00468572	0.142095	ENSG00000163444	0.847422	unchanged
1285.62	0.52465	0.185539	2.8277	0.00468831	0.142095	ENSG00000075539	0.847422	unchanged
5151.11	0.262444	0.0928496	2.82655	0.00470521	0.142485	ENSG00000067082	0.84623	unchanged
23343.1	0.479663	0.169817	2.82459	0.00473411	0.142873	ENSG00000204592	0.845051	unchanged
1078.87	-0.328558	0.116309	-2.82488	0.00472983	0.142873	ENSG00000122644	0.845051	unchanged
584.96	0.466727	0.165196	2.82528	0.00472391	0.142873	ENSG00000130962	0.845051	unchanged
5208.99	-0.30356	0.107466	-2.82469	0.00473259	0.142873	ENSG00000103415	0.845051	unchanged
175.624	0.956053	0.338693	2.82277	0.00476107	0.143383	ENSG00000164045	0.843502	unchanged
44.6757	-1.60657	0.569175	-2.82263	0.00476314	0.143383	ENSG00000072041	0.843502	unchanged
924.721	-0.511586	0.181215	-2.82309	0.00475635	0.143383	ENSG00000210196	0.843502	unchanged
3855.23	-0.265987	0.0943215	-2.82	0.00480237	0.144441	ENSG00000105401	0.840308	unchanged
650.055	0.665821	0.236244	2.81836	0.00482696	0.145058	ENSG00000176092	0.838458	unchanged
418.762	0.518729	0.184085	2.81788	0.00483415	0.145151	ENSG00000132970	0.838179	unchanged
1.222	-12.3631	4.38862	-2.81707	0.00484636	0.145272	ENSG00000289430	0.837818	unchanged
1499.05	0.397915	0.14125	2.8171	0.00484592	0.145272	ENSG00000055483	0.837818	unchanged
1225.08	0.500496	0.1778	2.81494	0.00487871	0.145878	ENSG00000085982	0.836009	unchanged
964.769	0.530934	0.188614	2.81492	0.00487892	0.145878	ENSG00000137198	0.836009	unchanged
3069.38	0.467824	0.166168	2.81538	0.00487203	0.145878	ENSG00000171724	0.836009	unchanged
153.624	0.718576	0.255356	2.81402	0.00489265	0.146115	ENSG00000284691	0.835304	unchanged
182.871	-0.812184	0.288637	-2.81386	0.00489508	0.146115	ENSG00000123561	0.835304	unchanged
3444.84	-0.456652	0.162339	-2.81296	0.00490875	0.146401	ENSG00000146007	0.834457	unchanged
824.8	-0.469243	0.166876	-2.81193	0.00492452	0.146747	ENSG00000147813	0.83343	unchanged
3665.44	0.335637	0.119374	2.81164	0.00492891	0.146755	ENSG00000110048	0.833407	unchanged
4754.24	-0.219244	0.0780054	-2.81063	0.00494448	0.147095	ENSG00000132254	0.832401	unchanged
4057.22	0.497324	0.176987	2.80995	0.00495487	0.147281	ENSG00000204264	0.831854	unchanged
5439.55	-0.376755	0.134103	-2.80944	0.00496272	0.147391	ENSG00000087302	0.83153	unchanged
6228.68	0.234468	0.0834825	2.80859	0.00497592	0.14753	ENSG00000198663	0.83112	unchanged
1429.42	-0.449092	0.159886	-2.80883	0.00497223	0.14753	ENSG00000137821	0.83112	unchanged
2093.66	-0.274695	0.0978144	-2.80833	0.00497988	0.14753	ENSG00000007541	0.83112	unchanged
3377.37	-0.326095	0.116155	-2.80741	0.00499423	0.14772	ENSG00000213281	0.830561	unchanged
3560.83	0.289208	0.103017	2.80738	0.00499462	0.14772	ENSG00000250056	0.830561	unchanged
2523.86	0.305859	0.109007	2.80586	0.00501826	0.148102	ENSG00000272886	0.829438	unchanged
3944.83	-0.367381	0.130936	-2.80581	0.00501906	0.148102	ENSG00000139168	0.829438	unchanged
23078.5	-0.26293	0.0937114	-2.80574	0.00502007	0.148102	ENSG00000167658	0.829438	unchanged
4500.31	0.293724	0.104702	2.80534	0.00502633	0.148164	ENSG00000173258	0.829257	unchanged
1320.58	0.526124	0.18757	2.80494	0.00503255	0.148224	ENSG00000150938	0.829081	unchanged
5083.82	-0.450127	0.160505	-2.80444	0.00504035	0.148331	ENSG00000132432	0.828769	unchanged
1352.55	0.489055	0.174411	2.80404	0.00504673	0.148378	ENSG00000117707	0.828629	unchanged
833.776	-0.437936	0.156193	-2.80381	0.00505033	0.148378	ENSG00000161920	0.828629	unchanged
2758.27	-0.306787	0.10943	-2.8035	0.00505505	0.148394	ENSG00000114383	0.828583	unchanged
514.103	-0.430124	0.153496	-2.80218	0.00507585	0.148882	ENSG00000179965	0.827159	unchanged
4993.49	-0.423544	0.151254	-2.80022	0.00510678	0.149665	ENSG00000214194	0.824879	unchanged
4184.81	0.250105	0.0893505	2.79915	0.00512376	0.150039	ENSG00000136986	0.823796	unchanged
206.921	-0.723539	0.258523	-2.79874	0.00513019	0.150103	ENSG00000173621	0.823609	unchanged
7.47538	4.91169	1.75621	2.79676	0.00516174	0.150654	ENSG00000169313	0.822019	unchanged
10703.1	-0.400676	0.143251	-2.79701	0.00515773	0.150654	ENSG00000198034	0.822019	unchanged
96.481	-1.0606	0.379215	-2.79684	0.0051605	0.150654	ENSG00000149506	0.822019	unchanged
454.116	-0.603162	0.215701	-2.79628	0.0051694	0.150682	ENSG00000164764	0.821938	unchanged
6070.37	-0.237153	0.0848133	-2.79617	0.0051712	0.150682	ENSG00000167964	0.821938	unchanged
1435.85	-0.454941	0.16277	-2.79499	0.0051901	0.151109	ENSG00000172785	0.82071	unchanged
399.746	0.532808	0.190694	2.79405	0.00520522	0.15123	ENSG00000180611	0.820362	unchanged
2884.01	-0.339043	0.12133	-2.79439	0.00519985	0.15123	ENSG00000177556	0.820362	unchanged
420.591	-0.554521	0.198473	-2.79394	0.00520703	0.15123	ENSG00000168071	0.820362	unchanged
2218.58	-0.419959	0.150327	-2.79363	0.00521195	0.151249	ENSG00000123384	0.820308	unchanged
142.096	-1.0202	0.365359	-2.79233	0.00523304	0.151737	ENSG00000107736	0.818909	unchanged
229.935	0.865956	0.310218	2.79144	0.0052474	0.151905	ENSG00000142677	0.818428	unchanged
0.894031	-12.252	4.38889	-2.79159	0.00524498	0.151905	ENSG00000225683	0.818428	unchanged
569.482	0.53266	0.190855	2.79091	0.00525594	0.152028	ENSG00000277161	0.818076	unchanged
76379.4	0.251762	0.0902845	2.78854	0.00529464	0.153023	ENSG00000139644	0.815244	unchanged
1984.91	-0.437233	0.156815	-2.78821	0.00530004	0.153054	ENSG00000176261	0.815155	unchanged
1316.16	0.42169	0.151276	2.78756	0.00531072	0.153238	ENSG00000148468	0.814634	unchanged
666.042	-0.490725	0.176066	-2.78716	0.00531721	0.153301	ENSG00000184924	0.814456	unchanged
152.498	-1.00703	0.361409	-2.78639	0.00532989	0.153417	ENSG00000178623	0.814127	unchanged
14.8007	-4.49454	1.61292	-2.78658	0.00532674	0.153417	ENSG00000233191	0.814127	unchanged
2342.5	-0.30678	0.110118	-2.78593	0.0053375	0.153512	ENSG00000176101	0.813859	unchanged
761.104	-0.449202	0.161295	-2.78497	0.00535328	0.153841	ENSG00000102805	0.812929	unchanged
16.1919	-2.69611	0.968257	-2.78449	0.00536115	0.153942	ENSG00000225342	0.812642	unchanged
3134.55	0.315745	0.113442	2.78332	0.00538063	0.154127	ENSG00000163162	0.81212	unchanged
1974.46	-0.404835	0.145437	-2.78358	0.00537631	0.154127	ENSG00000115226	0.81212	unchanged
4331.39	-0.368069	0.132223	-2.78369	0.0053744	0.154127	ENSG00000144840	0.81212	unchanged
3726.46	0.26981	0.0969653	2.78254	0.00539349	0.154371	ENSG00000175216	0.811433	unchanged
2887.17	0.318313	0.114416	2.78207	0.00540138	0.154473	ENSG00000112983	0.811149	unchanged
1237.72	0.361857	0.130114	2.78107	0.00541793	0.154572	ENSG00000243943	0.810869	unchanged
120.87	-1.87559	0.67436	-2.78129	0.00541425	0.154572	ENSG00000088726	0.810869	unchanged
12222.6	-0.253102	0.0910065	-2.78114	0.00541687	0.154572	ENSG00000182809	0.810869	unchanged
2748.84	-0.341271	0.122756	-2.78007	0.00543479	0.154804	ENSG00000162976	0.810217	unchanged
2185.58	-0.425427	0.153018	-2.78024	0.00543185	0.154804	ENSG00000165195	0.810217	unchanged
2681.2	-0.37023	0.133192	-2.77968	0.00544123	0.154863	ENSG00000262919	0.810051	unchanged
2397.53	0.292695	0.105311	2.77934	0.0054469	0.154901	ENSG00000151689	0.809947	unchanged
137.516	-0.76847	0.276569	-2.77858	0.00545968	0.15514	ENSG00000285873	0.809277	unchanged
801.259	0.337484	0.121505	2.77753	0.00547733	0.155517	ENSG00000185049	0.808223	unchanged
3489.63	0.286287	0.103093	2.77699	0.00548652	0.155653	ENSG00000113658	0.807842	unchanged
2000.22	0.370678	0.133525	2.77609	0.0055017	0.155959	ENSG00000110925	0.806989	unchanged
6360.89	-0.390144	0.140612	-2.7746	0.00552688	0.156462	ENSG00000163541	0.805591	unchanged
124.526	-1.17289	0.422737	-2.77452	0.00552826	0.156462	ENSG00000109205	0.805591	unchanged
260.235	-0.817248	0.294655	-2.77358	0.00554434	0.156792	ENSG00000183578	0.804676	unchanged
8828.21	0.302081	0.108942	2.77286	0.00555652	0.156829	ENSG00000196188	0.804575	unchanged
261.315	0.744039	0.268326	2.77289	0.00555602	0.156829	ENSG00000143603	0.804575	unchanged
40744.4	0.430306	0.155192	2.77273	0.00555888	0.156829	ENSG00000204525	0.804575	unchanged
519.653	-0.472576	0.170512	-2.77151	0.00557977	0.157043	ENSG00000117862	0.80398	unchanged
781.822	0.374643	0.135173	2.77157	0.00557862	0.157043	ENSG00000146587	0.80398	unchanged
4338.23	-0.253351	0.0913961	-2.77201	0.00557109	0.157043	ENSG00000133878	0.80398	unchanged
317.47	0.705079	0.254498	2.77047	0.0055975	0.157418	ENSG00000153093	0.802947	unchanged
586.822	-0.606054	0.218857	-2.76918	0.00561972	0.157917	ENSG00000256087	0.80157	unchanged
623.025	-0.404988	0.146289	-2.76841	0.00563314	0.158105	ENSG00000173171	0.801055	unchanged
2131.81	0.411735	0.148733	2.76828	0.0056353	0.158105	ENSG00000091157	0.801055	unchanged
39.1388	2.56998	0.928814	2.76695	0.0056583	0.158625	ENSG00000132000	0.799629	unchanged
1951.42	-0.451405	0.16319	-2.76612	0.00567275	0.158904	ENSG00000170801	0.798865	unchanged
3170.94	0.354668	0.128243	2.76559	0.00568201	0.159038	ENSG00000136144	0.798499	unchanged
2849.67	-0.364376	0.131804	-2.76452	0.00570061	0.159433	ENSG00000110871	0.797422	unchanged
12579.8	0.348484	0.126083	2.76393	0.00571093	0.159596	ENSG00000164054	0.796978	unchanged
2895.13	-0.452133	0.163681	-2.76227	0.00574005	0.160283	ENSG00000172922	0.795112	unchanged
11.6886	-2.88767	1.04566	-2.76158	0.00575225	0.160498	ENSG00000246334	0.794531	unchanged
5645.43	-0.411383	0.148998	-2.761	0.0057625	0.160657	ENSG00000114391	0.7941	unchanged
4246.79	-0.326722	0.118359	-2.76043	0.00577261	0.1608	ENSG00000136819	0.793713	unchanged
11089.9	-0.226856	0.0821883	-2.76019	0.00577669	0.1608	ENSG00000023191	0.793713	unchanged
1536.83	0.463953	0.168191	2.7585	0.0058068	0.161385	ENSG00000101298	0.792136	unchanged
1611.6	-0.266467	0.0965959	-2.75858	0.00580533	0.161385	ENSG00000101473	0.792136	unchanged
1143.21	0.530807	0.192469	2.75788	0.00581772	0.161562	ENSG00000010292	0.79166	unchanged
211.359	0.713115	0.258874	2.75468	0.00587493	0.163023	ENSG00000145416	0.78775	unchanged
71.1791	-2.25596	0.819086	-2.75424	0.0058828	0.163083	ENSG00000009765	0.787592	unchanged
2376.43	-0.359429	0.130527	-2.75369	0.00589282	0.163083	ENSG00000112667	0.787592	unchanged
1263.07	-0.326944	0.118718	-2.75395	0.00588799	0.163083	ENSG00000181649	0.787592	unchanged
7.11265	4.6987	1.70642	2.75354	0.00589544	0.163083	ENSG00000267251	0.787592	unchanged
21780.9	-0.399786	0.145246	-2.75247	0.00591475	0.163235	ENSG00000014641	0.787187	unchanged
1072.8	0.561099	0.203842	2.75262	0.00591199	0.163235	ENSG00000147255	0.787187	unchanged
1694.62	-0.343849	0.124908	-2.75282	0.00590848	0.163235	ENSG00000106991	0.787187	unchanged
4889.75	-0.347281	0.126197	-2.75189	0.00592525	0.163366	ENSG00000177600	0.786839	unchanged
589.585	-0.449473	0.163344	-2.7517	0.00592869	0.163366	ENSG00000104998	0.786839	unchanged
10.3092	-4.20032	1.52672	-2.7512	0.00593774	0.163488	ENSG00000233942	0.786513	unchanged
1556.77	-0.484622	0.176166	-2.75094	0.00594249	0.163492	ENSG00000138686	0.786503	unchanged
5101.27	-0.300708	0.109412	-2.7484	0.00598871	0.164636	ENSG00000140374	0.783475	unchanged
9.052	3.16102	1.15039	2.74778	0.00600004	0.164666	ENSG00000290689	0.783395	unchanged
90.518	0.956089	0.347967	2.74764	0.0060026	0.164666	ENSG00000183647	0.783395	unchanged
300.984	0.550548	0.200376	2.74758	0.00600372	0.164666	ENSG00000124440	0.783395	unchanged
67.6078	1.15639	0.421015	2.74668	0.0060202	0.164895	ENSG00000198626	0.782794	unchanged
7617.42	-0.222748	0.0810989	-2.74662	0.00602134	0.164895	ENSG00000168701	0.782794	unchanged
2155.5	0.428911	0.156225	2.74546	0.00604254	0.165342	ENSG00000137075	0.781618	unchanged
13182.7	-0.20932	0.0762487	-2.74522	0.00604698	0.165342	ENSG00000167468	0.781618	unchanged
195.501	-0.903818	0.32929	-2.74475	0.0060557	0.165453	ENSG00000101194	0.781326	unchanged
153.267	-1.0146	0.36985	-2.74328	0.0060828	0.165937	ENSG00000138778	0.780056	unchanged
264.225	0.707346	0.25783	2.74346	0.00607956	0.165937	ENSG00000274828	0.780056	unchanged
54.6771	1.2738	0.464636	2.7415	0.00611602	0.166651	ENSG00000070759	0.778192	unchanged
3322.74	0.305529	0.111472	2.74087	0.00612774	0.166651	ENSG00000152332	0.778192	unchanged
3806.27	-0.303477	0.110719	-2.74097	0.00612585	0.166651	ENSG00000184500	0.778192	unchanged
1863.37	0.356444	0.130045	2.74093	0.00612663	0.166651	ENSG00000141456	0.778192	unchanged
217.714	0.842314	0.307408	2.74005	0.00614295	0.166809	ENSG00000107815	0.77778	unchanged
6216.22	-0.399709	0.145865	-2.74026	0.00613907	0.166809	ENSG00000119705	0.77778	unchanged
2126.63	0.467359	0.17077	2.73677	0.00620457	0.167585	ENSG00000040933	0.775766	unchanged
10687.5	-0.256257	0.0935903	-2.73807	0.00618005	0.167585	ENSG00000095981	0.775766	unchanged
2993.87	0.461552	0.168631	2.73706	0.00619913	0.167585	ENSG00000064393	0.775766	unchanged
1437.58	-0.297739	0.108792	-2.73677	0.00620451	0.167585	ENSG00000148090	0.775766	unchanged
91322.1	-0.250126	0.0913646	-2.73767	0.00618754	0.167585	ENSG00000148180	0.775766	unchanged
1656.37	-0.392469	0.143351	-2.73782	0.00618487	0.167585	ENSG00000173156	0.775766	unchanged
3832.94	0.490543	0.179229	2.73696	0.00620093	0.167585	ENSG00000154856	0.775766	unchanged
19.7172	3.66509	1.3395	2.73617	0.00621585	0.167762	ENSG00000286681	0.775307	unchanged
2404.73	0.333336	0.121962	2.73311	0.00627401	0.169203	ENSG00000158435	0.771592	unchanged
5465.16	0.296714	0.108647	2.731	0.0063142	0.170053	ENSG00000106771	0.769415	unchanged
789.077	0.696908	0.255189	2.73095	0.00631513	0.170053	ENSG00000006210	0.769415	unchanged
1.15167e+06	-0.417096	0.152786	-2.72994	0.00633453	0.170446	ENSG00000210082	0.768412	unchanged
185.725	0.776511	0.284472	2.72966	0.00634001	0.170465	ENSG00000228878	0.768366	unchanged
6017.51	0.345723	0.126685	2.72899	0.00635291	0.170682	ENSG00000057294	0.767812	unchanged
837.645	-0.401632	0.147255	-2.72747	0.00638219	0.171339	ENSG00000074276	0.766143	unchanged
7656.62	-0.382148	0.140261	-2.72454	0.00643911	0.172476	ENSG00000181061	0.763272	unchanged
1079.18	-0.392306	0.143988	-2.72457	0.00643845	0.172476	ENSG00000163597	0.763272	unchanged
1535.15	0.313463	0.115037	2.72488	0.00643248	0.172476	ENSG00000141452	0.763272	unchanged
24.3045	-2.2638	0.831113	-2.72382	0.00645313	0.172721	ENSG00000140451	0.762655	unchanged
1115.59	-0.436357	0.160226	-2.72339	0.00646151	0.172815	ENSG00000101132	0.762419	unchanged
7182.18	0.278931	0.102436	2.72299	0.00646937	0.172895	ENSG00000189060	0.762218	unchanged
4018.13	-0.392513	0.144172	-2.72254	0.00647826	0.173002	ENSG00000042493	0.761948	unchanged
10813.9	-0.397928	0.146208	-2.72165	0.00649559	0.173335	ENSG00000164032	0.761115	unchanged
8206.76	-0.381622	0.140351	-2.71906	0.00654679	0.174569	ENSG00000124207	0.758032	unchanged
11395	-0.361876	0.133128	-2.71825	0.00656279	0.174865	ENSG00000105372	0.757297	unchanged
14415.5	-0.355852	0.130961	-2.71725	0.00658276	0.175265	ENSG00000127324	0.756304	unchanged
1289.26	0.4684	0.172467	2.71588	0.00661001	0.175859	ENSG00000133943	0.754835	unchanged
14155.1	0.446388	0.164378	2.71562	0.00661508	0.175862	ENSG00000019582	0.754828	unchanged
188685	-0.313423	0.115507	-2.71346	0.00665854	0.176877	ENSG00000171951	0.752328	unchanged
3620.81	0.5316	0.195929	2.71322	0.00666324	0.176877	ENSG00000110057	0.752328	unchanged
10118.6	-0.362268	0.133537	-2.71286	0.00667054	0.176939	ENSG00000135390	0.752177	unchanged
383.051	-0.471261	0.173888	-2.71014	0.00672548	0.178263	ENSG00000132205	0.748939	unchanged
910.156	0.510468	0.188382	2.70974	0.00673352	0.178343	ENSG00000145103	0.748744	unchanged
1927.53	-0.385409	0.142278	-2.70885	0.0067516	0.178688	ENSG00000175581	0.747904	unchanged
9588.92	-0.36783	0.135842	-2.70779	0.00677332	0.17913	ENSG00000116791	0.746832	unchanged
1492.61	-0.416341	0.153791	-2.70718	0.00678569	0.179323	ENSG00000181038	0.746364	unchanged
10985.7	-0.390273	0.144213	-2.70622	0.00680542	0.179711	ENSG00000065154	0.745426	unchanged
13.707	-2.43206	0.899141	-2.70487	0.00683318	0.180176	ENSG00000215162	0.744304	unchanged
279.664	-0.673766	0.249088	-2.70493	0.00683194	0.180176	ENSG00000101162	0.744304	unchanged
500.459	1.09632	0.405547	2.70332	0.00686501	0.180642	ENSG00000168062	0.743182	unchanged
10.2353	-6.11212	2.26101	-2.70327	0.00686613	0.180642	ENSG00000213693	0.743182	unchanged
4146.13	-0.269619	0.0997217	-2.70371	0.00685694	0.180642	ENSG00000134882	0.743182	unchanged
191.108	-0.704025	0.260608	-2.70147	0.0069033	0.181485	ENSG00000273297	0.741159	unchanged
2948.12	0.388063	0.143685	2.70079	0.00691753	0.18159	ENSG00000143776	0.740907	unchanged
51.7555	1.60533	0.594353	2.70097	0.00691385	0.18159	ENSG00000224687	0.740907	unchanged
1036.13	0.399765	0.148035	2.70048	0.00692397	0.181625	ENSG00000156504	0.740824	unchanged
6893.92	-0.377667	0.139957	-2.69845	0.00696638	0.182602	ENSG00000075239	0.738493	unchanged
1936.07	-0.307725	0.114064	-2.69782	0.0069796	0.182814	ENSG00000175061	0.737991	unchanged
2838.22	-0.332403	0.123234	-2.69734	0.00698951	0.182938	ENSG00000051523	0.737695	unchanged
1922.41	0.347717	0.128923	2.69709	0.00699485	0.182944	ENSG00000173065	0.737683	unchanged
4051.54	-0.307699	0.114134	-2.69596	0.0070187	0.183297	ENSG00000188976	0.736844	unchanged
2863.3	-0.292611	0.108528	-2.69618	0.00701394	0.183297	ENSG00000128872	0.736844	unchanged
6973.31	-0.384742	0.142873	-2.69291	0.00708319	0.184845	ENSG00000077380	0.733192	unchanged
4245.93	-0.445254	0.165539	-2.68972	0.00715126	0.186485	ENSG00000120533	0.729357	unchanged
365.099	-0.572099	0.212783	-2.68865	0.00717425	0.186809	ENSG00000151917	0.728601	unchanged
3040.4	-0.403093	0.149917	-2.68878	0.0071714	0.186809	ENSG00000182093	0.728601	unchanged
65.0093	1.7731	0.659631	2.68802	0.00718763	0.187021	ENSG00000133328	0.728111	unchanged
812.54	0.471157	0.175362	2.68677	0.00721459	0.187585	ENSG00000166959	0.726802	unchanged
441.344	0.533557	0.198618	2.68634	0.00722392	0.18769	ENSG00000147862	0.72656	unchanged
482.735	-0.397398	0.148041	-2.68438	0.00726635	0.188654	ENSG00000101084	0.724334	unchanged
573.512	-0.519148	0.193555	-2.68217	0.00731458	0.189767	ENSG00000196466	0.721779	unchanged
80.6642	-0.999554	0.372776	-2.68138	0.00733197	0.19008	ENSG00000225177	0.721065	unchanged
66.2359	-3.94954	1.47373	-2.67996	0.00736304	0.190545	ENSG00000000938	0.720003	unchanged
10269.4	-0.275601	0.102843	-2.67983	0.00736602	0.190545	ENSG00000111229	0.720003	unchanged
1400.75	0.367525	0.137144	2.67986	0.00736538	0.190545	ENSG00000170921	0.720003	unchanged
942.359	0.480131	0.179191	2.67944	0.00737463	0.190629	ENSG00000100731	0.719812	unchanged
518.896	-0.540583	0.201834	-2.67836	0.00739845	0.190886	ENSG00000115318	0.719227	unchanged
1050.4	0.479253	0.178942	2.67825	0.00740071	0.190886	ENSG00000112343	0.719227	unchanged
471.269	-0.549019	0.204986	-2.67832	0.00739918	0.190886	ENSG00000156172	0.719227	unchanged
7680.3	-0.348506	0.130166	-2.6774	0.00741959	0.191234	ENSG00000139329	0.718436	unchanged
11.7634	3.04436	1.13741	2.67657	0.0074379	0.191428	ENSG00000248485	0.717996	unchanged
994.173	0.831434	0.31063	2.67661	0.00743716	0.191428	ENSG00000066468	0.717996	unchanged
2045.32	-0.449251	0.16791	-2.67555	0.00746065	0.191789	ENSG00000037241	0.717176	unchanged
4735.19	0.303295	0.113362	2.67546	0.00746275	0.191789	ENSG00000099968	0.717176	unchanged
2405.09	0.35908	0.134268	2.67435	0.00748749	0.192286	ENSG00000204209	0.716053	unchanged
7800.47	-0.205026	0.0766784	-2.67384	0.00749885	0.192438	ENSG00000053371	0.71571	unchanged
8514.24	-0.393841	0.14738	-2.67228	0.00753379	0.193195	ENSG00000165502	0.714004	unchanged
2164.41	0.483187	0.180901	2.671	0.00756249	0.193791	ENSG00000115760	0.712667	unchanged
7.15924	-5.78287	2.16529	-2.67071	0.00756911	0.193821	ENSG00000248483	0.7126	unchanged
4.78456	5.76353	2.15858	2.67006	0.00758376	0.193933	ENSG00000248019	0.712348	unchanged
8.68832	-5.15378	1.93023	-2.67003	0.00758443	0.193933	ENSG00000285541	0.712348	unchanged
1314.85	-0.543756	0.203684	-2.6696	0.00759409	0.19404	ENSG00000196611	0.712108	unchanged
144.053	0.87216	0.32684	2.66846	0.00761992	0.194158	ENSG00000169598	0.711846	unchanged
11006.6	0.221685	0.0830754	2.66848	0.00761952	0.194158	ENSG00000118985	0.711846	unchanged
307.655	-0.610237	0.22864	-2.66898	0.00760819	0.194158	ENSG00000180921	0.711846	unchanged
14.7205	4.1869	1.56905	2.66843	0.00762056	0.194158	ENSG00000124256	0.711846	unchanged
1639.41	-0.319229	0.119694	-2.66704	0.00765218	0.194684	ENSG00000142627	0.710671	unchanged
6.4977	-5.71014	2.14092	-2.66714	0.00765001	0.194684	ENSG00000266952	0.710671	unchanged
7734.19	-0.218386	0.0819061	-2.6663	0.00766918	0.194976	ENSG00000188229	0.710018	unchanged
1161.78	-0.492991	0.185075	-2.66373	0.00772787	0.196328	ENSG00000198805	0.707018	unchanged
65.0368	1.17117	0.439984	2.66186	0.00777113	0.197286	ENSG00000255690	0.704905	unchanged
4292.97	-0.321124	0.120687	-2.6608	0.00779559	0.197765	ENSG00000155366	0.703851	unchanged
2780.33	-0.33333	0.125364	-2.6589	0.00783966	0.198741	ENSG00000114491	0.701712	unchanged
1172.62	0.385758	0.145164	2.65739	0.00787481	0.19949	ENSG00000079102	0.70008	unchanged
1855.32	0.301455	0.113468	2.65673	0.00789015	0.199735	ENSG00000021300	0.699545	unchanged
1149.65	-0.515984	0.194289	-2.65575	0.00791322	0.200177	ENSG00000164978	0.698586	unchanged
157.974	-1.1364	0.427982	-2.65526	0.00792483	0.200328	ENSG00000104371	0.698259	unchanged
1640.49	0.481506	0.181374	2.65477	0.00793632	0.200333	ENSG00000007062	0.698248	unchanged
8.25389	-5.40862	2.03727	-2.65484	0.0079346	0.200333	ENSG00000186417	0.698248	unchanged
105.127	-0.889412	0.33517	-2.65361	0.00796356	0.200592	ENSG00000163923	0.697685	unchanged
7.95745	-4.26458	1.60705	-2.65368	0.00796205	0.200592	ENSG00000218189	0.697685	unchanged
80.2601	-1.07782	0.40615	-2.65375	0.00796022	0.200592	ENSG00000130755	0.697685	unchanged
104.976	-0.964278	0.363429	-2.65328	0.00797148	0.20065	ENSG00000183775	0.697562	unchanged
326.094	0.680964	0.256785	2.65188	0.00800444	0.201336	ENSG00000198920	0.696078	unchanged
10.7295	3.6362	1.37187	2.65055	0.00803598	0.201986	ENSG00000164188	0.694678	unchanged
2107.26	0.376141	0.141949	2.64984	0.00805298	0.202139	ENSG00000121940	0.694349	unchanged
80.7635	-1.22504	0.462342	-2.64963	0.00805796	0.202139	ENSG00000118004	0.694349	unchanged
3417.16	-0.277104	0.104612	-2.64887	0.00807624	0.202139	ENSG00000173540	0.694349	unchanged
5651.5	-0.276054	0.104188	-2.64956	0.00805962	0.202139	ENSG00000119333	0.694349	unchanged
1112.78	0.441265	0.166585	2.64889	0.00807561	0.202139	ENSG00000136848	0.694349	unchanged
6082.77	0.214084	0.0808109	2.64919	0.00806839	0.202139	ENSG00000182107	0.694349	unchanged
44.4083	-2.53744	0.95813	-2.64833	0.00808913	0.202177	ENSG00000226258	0.694268	unchanged
6.29168	4.74471	1.79147	2.6485	0.00808502	0.202177	ENSG00000235281	0.694268	unchanged
766.539	0.414056	0.156495	2.6458	0.0081497	0.203548	ENSG00000143748	0.691334	unchanged
594.391	-0.458696	0.173387	-2.6455	0.00815694	0.203585	ENSG00000271147	0.691254	unchanged
44.1577	-1.2019	0.45442	-2.6449	0.00817147	0.203616	ENSG00000013297	0.691189	unchanged
3364.78	0.386808	0.146269	2.6445	0.00818112	0.203616	ENSG00000132356	0.691189	unchanged
1218.12	-1.38643	0.524218	-2.64475	0.00817509	0.203616	ENSG00000149968	0.691189	unchanged
318.163	0.639594	0.241853	2.64456	0.00817981	0.203616	ENSG00000181827	0.691189	unchanged
523.041	-0.519354	0.196673	-2.6407	0.00827357	0.205772	ENSG00000154734	0.686613	unchanged
6347.75	-0.401851	0.15227	-2.63908	0.00831324	0.206614	ENSG00000171863	0.68484	unchanged
795.878	-0.489004	0.185373	-2.63794	0.00834111	0.207017	ENSG00000163909	0.683994	unchanged
9792.05	-0.332348	0.125982	-2.63806	0.00833829	0.207017	ENSG00000148834	0.683994	unchanged
942.37	-0.367164	0.139253	-2.63668	0.00837225	0.207645	ENSG00000126460	0.682679	unchanged
31630.5	-0.21765	0.0826043	-2.63485	0.00841741	0.208197	ENSG00000163902	0.681525	unchanged
11.6444	2.76695	1.04989	2.63546	0.00840222	0.208197	ENSG00000160808	0.681525	unchanged
5813.58	-0.371723	0.141093	-2.63459	0.00842386	0.208197	ENSG00000120675	0.681525	unchanged
4330.43	-0.355631	0.134982	-2.63465	0.0084225	0.208197	ENSG00000242372	0.681525	unchanged
12884.5	-0.398547	0.151247	-2.63507	0.00841201	0.208197	ENSG00000131100	0.681525	unchanged
99.4447	1.19493	0.453745	2.63348	0.00845141	0.208733	ENSG00000127311	0.680409	unchanged
10.49	-2.57549	0.978187	-2.63292	0.00846549	0.208935	ENSG00000167525	0.679989	unchanged
523.42	-0.465858	0.176977	-2.6323	0.00848088	0.20917	ENSG00000257084	0.679502	unchanged
4972.02	-0.242069	0.0919793	-2.63178	0.00849385	0.209344	ENSG00000051620	0.67914	unchanged
661.706	0.452123	0.171816	2.63144	0.00850236	0.209408	ENSG00000179627	0.679007	unchanged
1381.92	-0.676208	0.257083	-2.63031	0.00853083	0.209828	ENSG00000136999	0.678137	unchanged
572.048	-0.41707	0.158564	-2.63029	0.00853122	0.209828	ENSG00000197696	0.678137	unchanged
3356.18	0.643966	0.244901	2.62949	0.00855134	0.210177	ENSG00000178685	0.677415	unchanged
12035.6	-0.393731	0.149774	-2.62884	0.00856757	0.21043	ENSG00000067064	0.676892	unchanged
2267.22	0.297934	0.11335	2.62845	0.00857747	0.210528	ENSG00000169446	0.676691	unchanged
3463	-0.395892	0.150632	-2.62821	0.00858343	0.210528	ENSG00000121022	0.676689	unchanged
5077.41	-0.310741	0.118265	-2.6275	0.00860141	0.210824	ENSG00000123159	0.67608	unchanged
1150.56	0.448388	0.170735	2.62623	0.00863365	0.211322	ENSG00000156804	0.675055	unchanged
1932.13	-0.340379	0.129597	-2.62644	0.00862824	0.211322	ENSG00000182154	0.675055	unchanged
3487.84	0.288563	0.109908	2.6255	0.00865209	0.211482	ENSG00000174738	0.674727	unchanged
1589.59	-0.252384	0.0961266	-2.62553	0.0086513	0.211482	ENSG00000169093	0.674727	unchanged
8.39891	4.17949	1.59251	2.62447	0.0086784	0.211979	ENSG00000144820	0.673708	unchanged
3761.12	0.306668	0.116887	2.62363	0.00869971	0.212353	ENSG00000165322	0.672941	unchanged
1378.45	0.285613	0.108873	2.62335	0.00870686	0.212382	ENSG00000187079	0.672883	unchanged
9337.59	0.257381	0.0982185	2.62049	0.00878037	0.214028	ENSG00000183508	0.66953	unchanged
3117.32	0.321958	0.122909	2.61948	0.00880634	0.214513	ENSG00000166170	0.668546	unchanged
2382.5	-0.357533	0.136624	-2.61691	0.00887302	0.215989	ENSG00000163832	0.665568	unchanged
2680.46	0.297366	0.113729	2.61468	0.00893103	0.217252	ENSG00000110435	0.663035	unchanged
5335.31	-0.355983	0.136258	-2.61257	0.00898632	0.218447	ENSG00000101843	0.660653	unchanged
9.20128	5.41286	2.07245	2.61181	0.00900632	0.218784	ENSG00000256008	0.659985	unchanged
1451.5	-0.262168	0.100403	-2.61116	0.00902358	0.219053	ENSG00000108064	0.65945	unchanged
3684.52	0.311822	0.119485	2.60972	0.00906163	0.219826	ENSG00000131844	0.65792	unchanged
193.7	-0.74609	0.285921	-2.60943	0.00906944	0.219866	ENSG00000249592	0.657842	unchanged
16.8079	2.64246	1.01277	2.60915	0.00907673	0.219892	ENSG00000146374	0.65779	unchanged
4.55796	-5.40118	2.07081	-2.60824	0.00910087	0.220176	ENSG00000256234	0.657229	unchanged
2439.58	0.265162	0.101661	2.60829	0.00909958	0.220176	ENSG00000083642	0.657229	unchanged
3672.89	0.405413	0.155482	2.60746	0.00912163	0.220209	ENSG00000149527	0.657165	unchanged
1381.74	-0.428747	0.164458	-2.60703	0.00913323	0.220209	ENSG00000171551	0.657165	unchanged
2840.48	0.305925	0.117334	2.6073	0.00912598	0.220209	ENSG00000204120	0.657165	unchanged
15.4919	2.0357	0.780836	2.60708	0.00913175	0.220209	ENSG00000259248	0.657165	unchanged
349.271	0.597866	0.229275	2.60764	0.0091168	0.220209	ENSG00000205744	0.657165	unchanged
86.5439	-1.28058	0.491397	-2.606	0.00916064	0.22072	ENSG00000158008	0.656159	unchanged
442.043	0.501244	0.192447	2.60458	0.00919863	0.221485	ENSG00000184384	0.654656	unchanged
486.367	-0.493794	0.189642	-2.60381	0.00921931	0.221832	ENSG00000069482	0.653976	unchanged
1064.91	0.513284	0.197217	2.60264	0.0092509	0.222442	ENSG00000187720	0.652784	unchanged
3085.67	0.370211	0.142268	2.60222	0.00926235	0.222566	ENSG00000170315	0.652541	unchanged
764.312	-0.401789	0.154504	-2.60052	0.00930836	0.22352	ENSG00000153363	0.650683	unchanged
3265.13	0.269542	0.103671	2.59998	0.00932282	0.223716	ENSG00000062650	0.650303	unchanged
24.9748	3.09163	1.18945	2.5992	0.00934411	0.223773	ENSG00000284713	0.650192	unchanged
1762.26	0.315651	0.12143	2.59944	0.00933759	0.223773	ENSG00000136153	0.650192	unchanged
10679	-0.370598	0.142572	-2.59937	0.00933955	0.223773	ENSG00000171928	0.650192	unchanged
25079.2	-0.249824	0.09613	-2.59881	0.00935478	0.223878	ENSG00000123989	0.649989	unchanged
1668.64	-0.363853	0.140054	-2.59795	0.00937815	0.224286	ENSG00000205758	0.649199	unchanged
942.915	-0.433919	0.167051	-2.59753	0.00938975	0.224412	ENSG00000104228	0.648954	unchanged
1658.28	-0.334463	0.128794	-2.59689	0.00940712	0.224525	ENSG00000214063	0.648736	unchanged
2909.23	-0.258984	0.0997237	-2.59702	0.00940376	0.224525	ENSG00000125835	0.648736	unchanged
924.016	-0.388867	0.14984	-2.59522	0.00945316	0.225472	ENSG00000197620	0.646908	unchanged
16.4698	-2.43396	0.938348	-2.59388	0.00948996	0.225894	ENSG00000237250	0.646095	unchanged
3501.81	-0.361582	0.139378	-2.59426	0.00947939	0.225894	ENSG00000146476	0.646095	unchanged
1640.76	-0.395602	0.152507	-2.59399	0.00948685	0.225894	ENSG00000141378	0.646095	unchanged
129.42	1.07097	0.412932	2.59358	0.00949818	0.225938	ENSG00000127329	0.64601	unchanged
1519.49	-0.404542	0.156032	-2.59268	0.00952304	0.226345	ENSG00000114270	0.64523	unchanged
2665.84	0.362659	0.1399	2.59227	0.00953439	0.226345	ENSG00000140403	0.64523	unchanged
2578.66	0.399547	0.154118	2.59248	0.00952865	0.226345	ENSG00000099953	0.64523	unchanged
712.965	0.53404	0.206037	2.59197	0.00954294	0.226396	ENSG00000204406	0.645131	unchanged
130.344	-0.755141	0.291451	-2.59097	0.00957053	0.226899	ENSG00000135722	0.644168	unchanged
802.873	-0.409578	0.158121	-2.59028	0.00958986	0.227205	ENSG00000109113	0.643581	unchanged
122.721	-0.920048	0.355284	-2.58961	0.0096084	0.227493	ENSG00000291156	0.643032	unchanged
10064.4	-0.313323	0.121014	-2.58914	0.00962164	0.227654	ENSG00000082153	0.642724	unchanged
2554.52	-0.294024	0.113596	-2.58833	0.00964426	0.227734	ENSG00000173545	0.642572	unchanged
13.34	2.9591	1.14311	2.58864	0.0096357	0.227734	ENSG00000261220	0.642572	unchanged
8883.96	-0.37244	0.143883	-2.5885	0.00963953	0.227734	ENSG00000132963	0.642572	unchanged
31.6369	-2.60548	1.00672	-2.58808	0.00965126	0.227748	ENSG00000164220	0.642546	unchanged
1554.4	-0.430316	0.166331	-2.58711	0.00967838	0.228236	ENSG00000070501	0.641616	unchanged
5.19015	-4.34318	1.67948	-2.58603	0.00970889	0.228804	ENSG00000224509	0.640537	unchanged
242.82	0.535313	0.207029	2.58569	0.00971846	0.228877	ENSG00000291214	0.640398	unchanged
513.512	-0.454867	0.175948	-2.58524	0.00973119	0.229025	ENSG00000148841	0.640117	unchanged
7.33729	-6.24055	2.41684	-2.58211	0.00981978	0.230846	ENSG00000128482	0.636678	unchanged
30.0099	-1.82923	0.708441	-2.58205	0.00982156	0.230846	ENSG00000261411	0.636678	unchanged
2541.46	-0.323299	0.125257	-2.58108	0.00984912	0.23127	ENSG00000164932	0.63588	unchanged
3886.98	-0.438208	0.169785	-2.58096	0.00985267	0.23127	ENSG00000129518	0.63588	unchanged
10647.4	-0.219977	0.085244	-2.58056	0.00986415	0.231387	ENSG00000159069	0.635661	unchanged
1606.55	-0.453876	0.175938	-2.57975	0.00988705	0.231771	ENSG00000175701	0.634941	unchanged
619.66	-0.523392	0.202925	-2.57924	0.00990173	0.231962	ENSG00000147889	0.634583	unchanged
81723.6	-0.355474	0.137845	-2.5788	0.00991432	0.232104	ENSG00000116209	0.634318	unchanged
212.603	-0.854473	0.331457	-2.57793	0.00993947	0.232539	ENSG00000215386	0.633504	unchanged
2035.92	-0.350692	0.136078	-2.57713	0.00996251	0.232924	ENSG00000177707	0.632785	unchanged
5349.44	0.246465	0.0957023	2.57533	0.0100146	0.233988	ENSG00000198952	0.630807	unchanged
2007.69	-0.37705	0.146477	-2.57412	0.0100496	0.234652	ENSG00000123415	0.629576	unchanged
9.89803	4.86146	1.88919	2.5733	0.0100734	0.235052	ENSG00000075340	0.628836	unchanged
8709.93	-0.185575	0.072131	-2.57275	0.0100895	0.235274	ENSG00000065978	0.628426	unchanged
1055.92	0.444462	0.172856	2.57128	0.0101323	0.236116	ENSG00000081818	0.626875	unchanged
5566.3	-0.430163	0.167313	-2.571	0.0101405	0.236152	ENSG00000182004	0.626808	unchanged
606.245	-0.370228	0.144064	-2.56988	0.0101733	0.236634	ENSG00000106266	0.625923	unchanged
1777	0.407656	0.158631	2.56984	0.0101745	0.236634	ENSG00000152223	0.625923	unchanged
4848.52	0.308756	0.120204	2.5686	0.010211	0.237328	ENSG00000166454	0.62465	unchanged
58.2659	-1.80958	0.704709	-2.56784	0.0102336	0.237696	ENSG00000164283	0.623979	unchanged
6.04066	-5.68093	2.21263	-2.5675	0.0102434	0.237769	ENSG00000176040	0.623845	unchanged
56317.7	-0.219545	0.08555	-2.56628	0.0102797	0.238315	ENSG00000135404	0.622849	unchanged
741.061	0.439665	0.171341	2.56603	0.0102871	0.238315	ENSG00000136108	0.622849	unchanged
619.764	0.54639	0.212926	2.5661	0.010285	0.238315	ENSG00000100034	0.622849	unchanged
64.6295	1.23423	0.481132	2.56527	0.0103096	0.238681	ENSG00000277511	0.622182	unchanged
5750.39	-0.375225	0.146286	-2.56502	0.0103171	0.238698	ENSG00000179933	0.622151	unchanged
5246.9	-0.401563	0.156586	-2.56448	0.010333	0.238912	ENSG00000172172	0.621762	unchanged
1408.14	-0.31143	0.121535	-2.56247	0.0103931	0.239989	ENSG00000124302	0.619809	unchanged
948.457	-0.360973	0.140859	-2.56265	0.0103876	0.239989	ENSG00000213753	0.619809	unchanged
901.102	-0.522595	0.203991	-2.56185	0.0104115	0.240063	ENSG00000114200	0.619674	unchanged
5.70871	4.79311	1.87107	2.56169	0.0104165	0.240063	ENSG00000196787	0.619674	unchanged
1591.2	0.377749	0.147461	2.56168	0.0104167	0.240063	ENSG00000130254	0.619674	unchanged
1117.29	0.386126	0.150751	2.56134	0.0104268	0.240141	ENSG00000125633	0.619534	unchanged
694.575	0.461772	0.180317	2.56089	0.0104405	0.240301	ENSG00000145990	0.619244	unchanged
1478.86	-0.338774	0.132322	-2.56022	0.0104607	0.24061	ENSG00000090971	0.618686	unchanged
1019.23	0.388388	0.151791	2.5587	0.0105065	0.241507	ENSG00000166398	0.61707	unchanged
35.6559	2.15277	0.841452	2.5584	0.0105154	0.241556	ENSG00000215246	0.616983	unchanged
1751.4	0.444423	0.173746	2.55788	0.0105312	0.24176	ENSG00000198740	0.616615	unchanged
6.70269	-4.98422	1.94909	-2.5572	0.010552	0.242081	ENSG00000188037	0.616039	unchanged
3068.74	-0.367179	0.143656	-2.55595	0.0105897	0.24254	ENSG00000102390	0.615216	unchanged
22.6434	-1.5787	0.617605	-2.55616	0.0105834	0.24254	ENSG00000183549	0.615216	unchanged
276.917	0.689749	0.269869	2.55586	0.0105925	0.24254	ENSG00000197608	0.615216	unchanged
2696.72	-0.322896	0.126352	-2.55553	0.0106026	0.242615	ENSG00000160688	0.615083	unchanged
1084.88	-0.424244	0.166028	-2.55526	0.0106108	0.242646	ENSG00000130768	0.615027	unchanged
1399.23	0.39906	0.156206	2.55471	0.0106276	0.242874	ENSG00000170949	0.614618	unchanged
6448.56	-0.389882	0.152679	-2.55361	0.0106614	0.243381	ENSG00000243147	0.613713	unchanged
1521.48	0.293107	0.114789	2.55344	0.0106665	0.243381	ENSG00000177425	0.613713	unchanged
1654.6	-0.30578	0.119758	-2.55331	0.0106703	0.243381	ENSG00000012061	0.613713	unchanged
1845.34	-0.338151	0.132457	-2.55292	0.0106825	0.243502	ENSG00000197345	0.613497	unchanged
147.979	0.759693	0.297611	2.55264	0.0106909	0.243538	ENSG00000259877	0.613434	unchanged
12824	-0.360835	0.141416	-2.55159	0.0107234	0.24412	ENSG00000161057	0.612396	unchanged
6.87755	3.47337	1.36155	2.55104	0.0107401	0.244344	ENSG00000225492	0.611999	unchanged
167.693	-0.986404	0.386912	-2.54943	0.01079	0.245321	ENSG00000187699	0.610265	unchanged
1478.84	0.443594	0.174041	2.54879	0.0108098	0.245614	ENSG00000140382	0.609747	unchanged
289.141	0.816243	0.320419	2.54742	0.0108522	0.246328	ENSG00000112984	0.608487	unchanged
2374.55	0.271784	0.106706	2.54703	0.0108645	0.246328	ENSG00000164808	0.608487	unchanged
1320.35	0.370087	0.145314	2.5468	0.0108715	0.246328	ENSG00000128923	0.608487	unchanged
1332.37	0.514782	0.202107	2.54708	0.0108629	0.246328	ENSG00000186260	0.608487	unchanged
1450.34	-0.418618	0.164379	-2.54666	0.0108759	0.246328	ENSG00000075336	0.608487	unchanged
60.8989	-1.45209	0.57033	-2.54606	0.0108947	0.246596	ENSG00000223518	0.608013	unchanged
2521.49	-0.311907	0.122555	-2.54504	0.0109264	0.247157	ENSG00000139324	0.607028	unchanged
11305	-0.275561	0.108374	-2.54268	0.0110007	0.247988	ENSG00000152700	0.605569	unchanged
7368.81	-0.34302	0.134889	-2.54298	0.0109911	0.247988	ENSG00000106803	0.605569	unchanged
706.397	0.531283	0.208898	2.54327	0.0109821	0.247988	ENSG00000036672	0.605569	unchanged
5711.17	-0.379264	0.149107	-2.54357	0.0109727	0.247988	ENSG00000100744	0.605569	unchanged
1498.14	-0.288312	0.113392	-2.54261	0.0110029	0.247988	ENSG00000011028	0.605569	unchanged
677.598	-0.452645	0.178029	-2.54254	0.0110051	0.247988	ENSG00000142207	0.605569	unchanged
36.4888	-1.82568	0.718212	-2.54198	0.0110228	0.248204	ENSG00000157680	0.605192	unchanged
8069.53	-0.383372	0.150828	-2.54179	0.0110286	0.248204	ENSG00000100387	0.605192	unchanged
9456.58	0.269868	0.106183	2.54154	0.0110366	0.248226	ENSG00000092010	0.605153	unchanged
732.792	0.448246	0.17646	2.54021	0.0110787	0.248856	ENSG00000042980	0.604052	unchanged
67242.8	-0.191477	0.0753719	-2.54043	0.0110717	0.248856	ENSG00000067225	0.604052	unchanged
6137.34	0.356789	0.140548	2.53856	0.0111309	0.249872	ENSG00000112773	0.602282	unchanged
349.616	-0.556065	0.219087	-2.5381	0.0111455	0.250041	ENSG00000170955	0.60199	unchanged
1883.92	-0.322613	0.12715	-2.53727	0.011172	0.250227	ENSG00000075426	0.601665	unchanged
10.4037	-4.48979	1.7696	-2.53718	0.011175	0.250227	ENSG00000288076	0.601665	unchanged
80.0377	1.5701	0.618797	2.53734	0.0111698	0.250227	ENSG00000172349	0.601665	unchanged
115.878	0.765416	0.301728	2.53677	0.011188	0.250361	ENSG00000056291	0.601433	unchanged
15.0909	4.53979	1.78984	2.53642	0.0111993	0.250456	ENSG00000149596	0.601269	unchanged
1826.18	0.330134	0.130183	2.53592	0.0112153	0.250657	ENSG00000196865	0.60092	unchanged
3565.18	-0.23879	0.0941767	-2.53556	0.0112268	0.250741	ENSG00000175756	0.600775	unchanged
742.942	0.642549	0.25345	2.53521	0.0112381	0.250741	ENSG00000072121	0.600775	unchanged
26.2328	2.17148	0.856553	2.53514	0.0112403	0.250741	ENSG00000167419	0.600775	unchanged
6298.93	-0.202753	0.0800321	-2.53339	0.0112964	0.251836	ENSG00000172809	0.598883	unchanged
11.9447	3.97269	1.56896	2.53205	0.0113399	0.252645	ENSG00000226609	0.597489	unchanged
757.077	0.413811	0.163486	2.53117	0.0113681	0.253116	ENSG00000105866	0.596681	unchanged
920.77	-0.414792	0.163938	-2.53018	0.0114005	0.253676	ENSG00000104524	0.59572	unchanged
878	-0.347918	0.137556	-2.52929	0.0114295	0.254163	ENSG00000099203	0.594888	unchanged
2483.24	0.329378	0.130287	2.5281	0.0114682	0.254227	ENSG00000198301	0.594778	unchanged
3096.94	0.348066	0.137653	2.52857	0.0114527	0.254227	ENSG00000137166	0.594778	unchanged
111549	-0.324821	0.128474	-2.5283	0.0114616	0.254227	ENSG00000109971	0.594778	unchanged
271.129	0.940417	0.371876	2.52885	0.0114438	0.254227	ENSG00000110395	0.594778	unchanged
5.96722	-4.08846	1.61698	-2.52845	0.0114568	0.254227	ENSG00000291074	0.594778	unchanged
1581.46	0.347442	0.137457	2.52764	0.0114832	0.254402	ENSG00000133789	0.59448	unchanged
1004.2	0.364502	0.144349	2.52514	0.0115651	0.255358	ENSG00000181982	0.592851	unchanged
956.355	0.554152	0.219466	2.52501	0.0115696	0.255358	ENSG00000182132	0.592851	unchanged
101.669	1.0304	0.408046	2.52521	0.0115629	0.255358	ENSG00000280002	0.592851	unchanged
4277.73	0.276703	0.109575	2.52524	0.0115618	0.255358	ENSG00000089818	0.592851	unchanged
1093.74	-0.3203	0.126847	-2.52508	0.0115672	0.255358	ENSG00000140931	0.592851	unchanged
2355.7	-0.263717	0.104422	-2.5255	0.0115534	0.255358	ENSG00000176170	0.592851	unchanged
1095.89	0.388769	0.154038	2.52385	0.0116078	0.256043	ENSG00000135069	0.591687	unchanged
6.32057	-4.06384	1.61188	-2.52118	0.0116963	0.257835	ENSG00000137251	0.588657	unchanged
78.5263	-1.1417	0.453006	-2.52028	0.0117261	0.25833	ENSG00000172548	0.587824	unchanged
2745.98	-0.295835	0.117393	-2.52004	0.0117343	0.258351	ENSG00000171307	0.587789	unchanged
863.422	0.326688	0.129691	2.51898	0.0117695	0.258704	ENSG00000048342	0.587198	unchanged
1986.64	-0.420075	0.166769	-2.5189	0.0117722	0.258704	ENSG00000113083	0.587198	unchanged
1804.27	0.388576	0.154249	2.51915	0.0117638	0.258704	ENSG00000130803	0.587198	unchanged
1888.87	0.334866	0.132953	2.51868	0.0117795	0.258705	ENSG00000164715	0.587195	unchanged
13.3426	3.03477	1.20511	2.51824	0.0117942	0.258826	ENSG00000250208	0.586992	unchanged
1448.68	0.322681	0.128146	2.51808	0.0117996	0.258826	ENSG00000072415	0.586992	unchanged
1480.53	-0.389599	0.154766	-2.51734	0.0118243	0.259207	ENSG00000153822	0.586353	unchanged
3155.6	0.293613	0.116679	2.51641	0.0118557	0.259575	ENSG00000104067	0.585737	unchanged
802.522	-0.406016	0.161344	-2.51647	0.0118538	0.259575	ENSG00000176155	0.585737	unchanged
189.542	-0.871821	0.346642	-2.51505	0.0119016	0.260419	ENSG00000126878	0.584327	unchanged
721.197	-0.473705	0.188369	-2.51478	0.0119107	0.260458	ENSG00000113734	0.584262	unchanged
37.4236	1.66673	0.66315	2.51336	0.0119587	0.261232	ENSG00000108381	0.582974	unchanged
2403.82	0.319361	0.127069	2.5133	0.0119608	0.261232	ENSG00000130703	0.582974	unchanged
1055.69	-0.352386	0.14024	-2.51275	0.0119795	0.261479	ENSG00000214113	0.582562	unchanged
4824.84	0.44995	0.179163	2.51141	0.0120251	0.262152	ENSG00000143376	0.581446	unchanged
3150.68	-0.29986	0.119389	-2.51162	0.0120179	0.262152	ENSG00000164117	0.581446	unchanged
3664.01	-0.337317	0.134335	-2.511	0.0120389	0.262165	ENSG00000108010	0.581425	unchanged
19875.8	0.194934	0.0776335	2.51095	0.0120405	0.262165	ENSG00000185896	0.581425	unchanged
1936.54	-0.368608	0.146821	-2.5106	0.0120526	0.262268	ENSG00000176209	0.581255	unchanged
153.494	-0.808419	0.322136	-2.50956	0.0120881	0.262879	ENSG00000136160	0.580244	unchanged
750.461	0.51221	0.20416	2.50887	0.0121117	0.263232	ENSG00000185252	0.579661	unchanged
1415.73	-0.285118	0.113677	-2.50813	0.0121372	0.263623	ENSG00000240342	0.579016	unchanged
3073.65	-0.238617	0.0951624	-2.50748	0.0121597	0.26395	ENSG00000141698	0.578478	unchanged
179.58	-0.552124	0.220343	-2.50574	0.0122195	0.265087	ENSG00000110200	0.576612	unchanged
3301.59	-0.35787	0.142922	-2.50395	0.0122814	0.266268	ENSG00000096092	0.574681	unchanged
662.032	-0.344926	0.137855	-2.50209	0.0123464	0.267512	ENSG00000160606	0.572657	unchanged
9745.85	-0.343191	0.137195	-2.50149	0.0123673	0.267607	ENSG00000181163	0.572502	unchanged
1571.31	0.326873	0.130673	2.50146	0.0123684	0.267607	ENSG00000184349	0.572502	unchanged
1088.02	0.435429	0.17408	2.50131	0.0123734	0.267607	ENSG00000183778	0.572502	unchanged
869.431	0.483805	0.193619	2.49875	0.0124632	0.269021	ENSG00000157216	0.570214	unchanged
13515.8	0.379573	0.151915	2.49858	0.0124691	0.269021	ENSG00000106261	0.570214	unchanged
697.685	0.370062	0.148108	2.4986	0.0124686	0.269021	ENSG00000157657	0.570214	unchanged
24.7465	-3.57237	1.4296	-2.49887	0.0124591	0.269021	ENSG00000100368	0.570214	unchanged
1391.04	0.290334	0.116214	2.49827	0.01248	0.269093	ENSG00000082146	0.570098	unchanged
36298.2	-0.349992	0.140177	-2.49679	0.0125324	0.270059	ENSG00000165678	0.568541	unchanged
1551.28	-0.39488	0.158217	-2.49582	0.0125667	0.270634	ENSG00000160862	0.567617	unchanged
14275.8	-0.229712	0.0920581	-2.49529	0.0125853	0.27087	ENSG00000169223	0.567238	unchanged
5016.7	-0.319006	0.127876	-2.49465	0.0126083	0.2712	ENSG00000149100	0.56671	unchanged
573.633	0.497511	0.19948	2.49404	0.0126299	0.271263	ENSG00000127249	0.56661	unchanged
1060.57	-0.262809	0.105376	-2.494	0.0126313	0.271263	ENSG00000196976	0.56661	unchanged
1615.29	0.32112	0.128761	2.49392	0.0126341	0.271263	ENSG00000157557	0.56661	unchanged
7020.82	0.259083	0.103934	2.49277	0.012675	0.271977	ENSG00000143799	0.565468	unchanged
3920.63	-0.335311	0.134553	-2.49204	0.0127012	0.272209	ENSG00000174132	0.565097	unchanged
685.35	-0.465877	0.186939	-2.49214	0.0126978	0.272209	ENSG00000111678	0.565097	unchanged
7367.21	-0.381808	0.153228	-2.49177	0.0127109	0.272253	ENSG00000196531	0.565027	unchanged
50.7497	2.39362	0.961156	2.49035	0.0127616	0.272638	ENSG00000122223	0.564413	unchanged
3665.76	-0.254099	0.10204	-2.49019	0.0127673	0.272638	ENSG00000146540	0.564413	unchanged
3225.75	-0.40067	0.160878	-2.49051	0.0127559	0.272638	ENSG00000090263	0.564413	unchanged
5.96651	-4.87451	1.95713	-2.49064	0.0127513	0.272638	ENSG00000261502	0.564413	unchanged
2004.7	-0.319318	0.128202	-2.49075	0.0127475	0.272638	ENSG00000105676	0.564413	unchanged
13.5955	4.82786	1.93915	2.48968	0.0127858	0.272705	ENSG00000185760	0.564307	unchanged
737.617	0.471803	0.189492	2.48982	0.0127806	0.272705	ENSG00000179981	0.564307	unchanged
320.806	-0.573451	0.230416	-2.48876	0.0128189	0.273246	ENSG00000088766	0.563446	unchanged
1354.32	0.313079	0.125866	2.48741	0.0128677	0.274089	ENSG00000143514	0.562109	unchanged
1386.55	0.385034	0.154817	2.48703	0.0128816	0.274089	ENSG00000183134	0.562109	unchanged
2544.33	0.354256	0.14244	2.48706	0.0128804	0.274089	ENSG00000103994	0.562109	unchanged
373.426	0.774747	0.311597	2.48637	0.0129052	0.274098	ENSG00000168016	0.562094	unchanged
11156.3	0.202912	0.0816015	2.48662	0.0128962	0.274098	ENSG00000107372	0.562094	unchanged
80.9038	1.67117	0.672117	2.48642	0.0129034	0.274098	ENSG00000111452	0.562094	unchanged
729.01	-0.372886	0.150017	-2.48562	0.0129325	0.274515	ENSG00000197780	0.561434	unchanged
4736.95	0.269905	0.108601	2.48529	0.0129447	0.274609	ENSG00000114062	0.561285	unchanged
46.9003	-1.39077	0.55975	-2.48463	0.0129688	0.274955	ENSG00000114113	0.560738	unchanged
16513.3	-0.227918	0.0917505	-2.4841	0.0129879	0.275195	ENSG00000010256	0.560359	unchanged
688.947	0.541916	0.218342	2.48196	0.0130661	0.276194	ENSG00000171004	0.558787	unchanged
1058.22	-0.326486	0.131533	-2.48216	0.0130589	0.276194	ENSG00000147804	0.558787	unchanged
19.8068	-1.94074	0.781817	-2.48234	0.0130522	0.276194	ENSG00000254290	0.558787	unchanged
16.4654	-1.91214	0.770403	-2.48201	0.0130645	0.276194	ENSG00000258788	0.558787	unchanged
190.756	0.65286	0.263083	2.48157	0.0130805	0.276219	ENSG00000188959	0.558747	unchanged
5.99396	4.51575	1.81976	2.48151	0.0130829	0.276219	ENSG00000258702	0.558747	unchanged
1240.37	0.483454	0.19484	2.48128	0.0130911	0.276228	ENSG00000148702	0.558733	unchanged
3830.73	0.283594	0.114312	2.48089	0.0131056	0.276313	ENSG00000038274	0.558599	unchanged
1950.83	0.328608	0.132463	2.48075	0.0131107	0.276313	ENSG00000161542	0.558599	unchanged
5683.81	-0.232078	0.0935603	-2.48052	0.0131192	0.276328	ENSG00000143321	0.558574	unchanged
175.006	-0.76896	0.310042	-2.48018	0.0131317	0.276429	ENSG00000135074	0.558417	unchanged
967.497	-0.383029	0.154549	-2.47836	0.0131986	0.277672	ENSG00000150756	0.556468	unchanged
7529.27	0.277557	0.112036	2.4774	0.0132345	0.278134	ENSG00000072803	0.555745	unchanged
587.492	-0.450051	0.181666	-2.47735	0.0132363	0.278134	ENSG00000108590	0.555745	unchanged
4932.15	-0.34674	0.140034	-2.47612	0.013282	0.27893	ENSG00000170860	0.554505	unchanged
937.646	-0.319656	0.129111	-2.47583	0.0132929	0.278993	ENSG00000242779	0.554407	unchanged
3943.28	-0.330609	0.13363	-2.47406	0.0133588	0.280111	ENSG00000170899	0.552669	unchanged
7817.6	-0.208751	0.0843789	-2.47397	0.0133619	0.280111	ENSG00000160014	0.552669	unchanged
1160.42	0.345384	0.139629	2.47358	0.0133768	0.280257	ENSG00000126216	0.552443	unchanged
18495.5	-0.268862	0.108715	-2.47308	0.0133953	0.28048	ENSG00000123131	0.552098	unchanged
6627.09	0.338937	0.137107	2.47207	0.0134333	0.281109	ENSG00000240694	0.551125	unchanged
274.242	0.804668	0.325565	2.4716	0.0134509	0.281304	ENSG00000121903	0.550825	unchanged
707.21	0.371456	0.150302	2.4714	0.0134584	0.281304	ENSG00000272391	0.550825	unchanged
1565.94	0.262784	0.106367	2.47055	0.0134907	0.281812	ENSG00000166526	0.55004	unchanged
21.7899	-2.29975	0.931052	-2.47005	0.0135093	0.282034	ENSG00000176697	0.549698	unchanged
1118.18	-0.342111	0.138545	-2.46932	0.013537	0.28228	ENSG00000139546	0.54932	unchanged
1094.76	-0.328002	0.13283	-2.46933	0.0135365	0.28228	ENSG00000100211	0.54932	unchanged
1214.99	-0.501169	0.203002	-2.46879	0.0135572	0.282369	ENSG00000237767	0.549182	unchanged
168.192	-0.685114	0.277498	-2.4689	0.0135528	0.282369	ENSG00000237476	0.549182	unchanged
858.807	0.528575	0.214177	2.46793	0.0135895	0.282878	ENSG00000196422	0.548401	unchanged
997.014	0.365987	0.14832	2.46755	0.0136039	0.283011	ENSG00000103540	0.548196	unchanged
6070.8	-0.277199	0.112373	-2.46677	0.0136338	0.2833	ENSG00000115758	0.547753	unchanged
1300.52	-0.379377	0.153785	-2.46693	0.0136277	0.2833	ENSG00000273611	0.547753	unchanged
287.425	-0.60308	0.244503	-2.46656	0.0136418	0.283301	ENSG00000163209	0.547751	unchanged
420.166	0.4109	0.166649	2.46566	0.0136761	0.283847	ENSG00000162714	0.546915	unchanged
854.833	0.332119	0.134712	2.4654	0.013686	0.283887	ENSG00000077514	0.546855	unchanged
1927.26	0.42849	0.173831	2.46498	0.013702	0.284052	ENSG00000196233	0.546602	unchanged
446.111	0.639467	0.259547	2.46378	0.0137482	0.284844	ENSG00000179097	0.545393	unchanged
1586	-0.380783	0.154571	-2.46348	0.0137596	0.284913	ENSG00000172465	0.545288	unchanged
77.8147	1.47503	0.598877	2.463	0.013778	0.284963	ENSG00000149295	0.545212	unchanged
2618.54	-0.35329	0.143428	-2.46319	0.0137706	0.284963	ENSG00000227877	0.545212	unchanged
538.548	0.526015	0.213636	2.4622	0.013809	0.285436	ENSG00000157106	0.544491	unchanged
2572.67	-0.336335	0.136683	-2.4607	0.0138666	0.286294	ENSG00000170619	0.543188	unchanged
6019.06	0.17352	0.0705143	2.46078	0.0138635	0.286294	ENSG00000205937	0.543188	unchanged
3912.4	-0.314305	0.127766	-2.46002	0.0138931	0.286674	ENSG00000181019	0.542612	unchanged
1478.24	-0.38958	0.158396	-2.45953	0.0139119	0.286896	ENSG00000135698	0.542275	unchanged
1266.93	0.327684	0.133253	2.45911	0.0139284	0.287069	ENSG00000151498	0.542014	unchanged
4049.04	-0.276027	0.112268	-2.45864	0.0139464	0.287272	ENSG00000071859	0.541706	unchanged
6613.09	-0.39316	0.159933	-2.45828	0.0139605	0.287397	ENSG00000114520	0.541518	unchanged
5091.58	-0.275793	0.112203	-2.45798	0.0139719	0.287466	ENSG00000188643	0.541414	unchanged
2164.34	-0.311247	0.126644	-2.45766	0.0139844	0.287556	ENSG00000114107	0.541278	unchanged
14095	-0.233283	0.0949309	-2.4574	0.0139949	0.287604	ENSG00000167642	0.541205	unchanged
43.5475	-1.87121	0.761631	-2.45684	0.0140164	0.287879	ENSG00000236740	0.54079	unchanged
2690.14	-0.279837	0.113926	-2.45631	0.0140371	0.288138	ENSG00000166575	0.5404	unchanged
320.956	-0.607905	0.24754	-2.45578	0.0140577	0.288395	ENSG00000236213	0.540012	unchanged
8170.71	-0.330556	0.134634	-2.45522	0.0140799	0.288684	ENSG00000120265	0.539578	unchanged
358.137	0.796738	0.32475	2.45339	0.0141516	0.289874	ENSG00000204267	0.537791	unchanged
19.8003	2.81774	1.14854	2.45332	0.0141543	0.289874	ENSG00000254231	0.537791	unchanged
2840.29	-0.3658	0.149165	-2.45231	0.0141941	0.290521	ENSG00000107625	0.536823	unchanged
762.205	0.552306	0.225308	2.45133	0.0142328	0.291146	ENSG00000117036	0.53589	unchanged
2670.53	0.26742	0.109111	2.4509	0.0142498	0.291201	ENSG00000085449	0.535807	unchanged
3218.37	-0.250888	0.102368	-2.45085	0.014252	0.291201	ENSG00000184076	0.535807	unchanged
1607.67	0.481905	0.196674	2.45028	0.0142746	0.291496	ENSG00000198853	0.535368	unchanged
2746.37	0.251186	0.102524	2.45002	0.0142847	0.291534	ENSG00000178974	0.535311	unchanged
7502.9	-0.307794	0.125675	-2.44912	0.0143206	0.2921	ENSG00000116685	0.534469	unchanged
19487.4	0.33823	0.138115	2.44891	0.014329	0.292103	ENSG00000070087	0.534464	unchanged
4.45562	5.76617	2.35657	2.44684	0.0144113	0.293612	ENSG00000258754	0.532226	unchanged
692.202	0.633388	0.258911	2.44636	0.0144308	0.293841	ENSG00000105559	0.531888	unchanged
6015.69	-0.374263	0.153003	-2.44612	0.0144405	0.293869	ENSG00000143106	0.531847	unchanged
22.7435	-2.52263	1.03143	-2.44575	0.0144553	0.294002	ENSG00000250069	0.53165	unchanged
2655.38	-0.342489	0.140052	-2.44545	0.0144673	0.294065	ENSG00000186310	0.531557	unchanged
3.91706	-4.72127	1.93079	-2.44526	0.014475	0.294065	ENSG00000254139	0.531557	unchanged
494.513	0.444643	0.181926	2.44409	0.0145217	0.294676	ENSG00000131697	0.530655	unchanged
17.64	-2.82978	1.15775	-2.4442	0.0145172	0.294676	ENSG00000111701	0.530655	unchanged
119829	-0.320559	0.131179	-2.44366	0.0145389	0.294858	ENSG00000182718	0.530387	unchanged
1760.26	0.279397	0.114347	2.44341	0.0145492	0.294886	ENSG00000129657	0.530345	unchanged
10073	0.315734	0.129229	2.44322	0.014557	0.294886	ENSG00000204103	0.530345	unchanged
41.7567	-2.45017	1.00299	-2.44287	0.0145709	0.295	ENSG00000258227	0.530178	unchanged
130.127	0.777442	0.318386	2.44182	0.0146133	0.295091	ENSG00000228175	0.530044	unchanged
5036.25	-0.353566	0.14478	-2.44209	0.0146025	0.295091	ENSG00000109184	0.530044	unchanged
3485.57	-0.339064	0.138843	-2.44207	0.0146033	0.295091	ENSG00000120697	0.530044	unchanged
2543.72	-0.317461	0.129991	-2.44218	0.014599	0.295091	ENSG00000091947	0.530044	unchanged
2879.8	-0.294312	0.120534	-2.44173	0.014617	0.295091	ENSG00000122490	0.530044	unchanged
13161.3	-0.269056	0.11023	-2.44086	0.0146524	0.295474	ENSG00000116171	0.529481	unchanged
538.699	-0.453694	0.185875	-2.44085	0.0146525	0.295474	ENSG00000174177	0.529481	unchanged
1394.19	-0.356693	0.146161	-2.44041	0.0146706	0.295544	ENSG00000162576	0.529378	unchanged
981.938	-0.37919	0.155383	-2.44036	0.0146727	0.295544	ENSG00000148950	0.529378	unchanged
622.857	0.441863	0.181098	2.43991	0.0146907	0.295739	ENSG00000087903	0.529091	unchanged
14211.4	-0.318288	0.130498	-2.43903	0.0147269	0.2963	ENSG00000116459	0.528268	unchanged
822.671	0.363486	0.149072	2.43833	0.0147553	0.296438	ENSG00000162923	0.528067	unchanged
9397.32	-0.26666	0.109353	-2.43853	0.0147471	0.296438	ENSG00000254999	0.528067	unchanged
1521.03	-0.25844	0.106004	-2.43802	0.0147678	0.296438	ENSG00000160326	0.528067	unchanged
1457.6	0.375379	0.15397	2.438	0.014769	0.296438	ENSG00000187764	0.528067	unchanged
2955.34	0.265148	0.108764	2.43783	0.0147755	0.296438	ENSG00000166164	0.528067	unchanged
166.532	0.85277	0.349959	2.43677	0.014819	0.296984	ENSG00000168778	0.527267	unchanged
1122.56	0.386534	0.158626	2.43676	0.0148195	0.296984	ENSG00000196712	0.527267	unchanged
1227.76	0.313354	0.128626	2.43617	0.0148438	0.297067	ENSG00000121989	0.527146	unchanged
8321.85	-0.243373	0.099905	-2.43605	0.0148487	0.297067	ENSG00000166441	0.527146	unchanged
12605.5	0.211764	0.0869235	2.43621	0.014842	0.297067	ENSG00000133639	0.527146	unchanged
494.239	0.486849	0.200138	2.43256	0.0149925	0.299646	ENSG00000116205	0.523392	unchanged
2179.97	-0.262501	0.107917	-2.43244	0.0149976	0.299646	ENSG00000174744	0.523392	unchanged
437.536	0.405025	0.166519	2.43231	0.015003	0.299646	ENSG00000103343	0.523392	unchanged
9457.59	-0.212986	0.0876502	-2.42995	0.0151008	0.30143	ENSG00000124299	0.520814	unchanged
2877.52	-0.279852	0.115182	-2.42964	0.0151137	0.301518	ENSG00000246705	0.520687	unchanged
488.195	0.543954	0.224133	2.42692	0.0152274	0.303617	ENSG00000130813	0.517675	unchanged
3563.47	-0.295027	0.121591	-2.42639	0.0152497	0.30389	ENSG00000174307	0.517283	unchanged
34.3958	-2.18454	0.900403	-2.42618	0.0152588	0.303901	ENSG00000174343	0.517268	unchanged
3559.72	-0.307999	0.127051	-2.42421	0.0153416	0.305377	ENSG00000136247	0.515163	unchanged
528.945	-0.485301	0.200235	-2.42366	0.0153652	0.305383	ENSG00000243709	0.515155	unchanged
1269.43	-0.370931	0.15305	-2.4236	0.0153677	0.305383	ENSG00000053108	0.515155	unchanged
2238.25	-0.243753	0.100558	-2.424	0.0153507	0.305383	ENSG00000125753	0.515155	unchanged
17219.9	-0.296979	0.122581	-2.42273	0.0154044	0.305773	ENSG00000123562	0.514601	unchanged
625.527	0.39548	0.163245	2.42261	0.0154094	0.305773	ENSG00000019995	0.514601	unchanged
1642.88	-0.387961	0.160148	-2.42252	0.0154131	0.305773	ENSG00000108384	0.514601	unchanged
18836.4	-0.297523	0.12285	-2.42183	0.0154425	0.305972	ENSG00000184432	0.514319	unchanged
1071.24	-0.361383	0.149224	-2.42175	0.015446	0.305972	ENSG00000156831	0.514319	unchanged
2094.44	-0.321721	0.132851	-2.42168	0.015449	0.305972	ENSG00000105518	0.514319	unchanged
299.193	0.746854	0.308432	2.42146	0.0154585	0.305989	ENSG00000198963	0.514295	unchanged
7755.4	0.223213	0.0921987	2.421	0.0154779	0.306203	ENSG00000139163	0.513991	unchanged
1861	0.25199	0.104115	2.42031	0.0155072	0.306611	ENSG00000012963	0.513412	unchanged
4543.29	-0.384568	0.158918	-2.41992	0.015524	0.306772	ENSG00000213619	0.513184	unchanged
3255.01	0.208982	0.0863761	2.41944	0.0155444	0.306833	ENSG00000075413	0.513099	unchanged
2508.4	-0.36763	0.151936	-2.41964	0.015536	0.306833	ENSG00000108641	0.513099	unchanged
3996.42	-0.21287	0.0880088	-2.41874	0.0155744	0.306914	ENSG00000114745	0.512983	unchanged
481.799	0.541488	0.223866	2.4188	0.0155716	0.306914	ENSG00000177125	0.512983	unchanged
4866.57	0.232507	0.0961251	2.4188	0.0155719	0.306914	ENSG00000197586	0.512983	unchanged
3066.05	-0.27715	0.114597	-2.41847	0.0155858	0.306967	ENSG00000197457	0.512909	unchanged
18976.9	0.342381	0.141607	2.41783	0.0156132	0.307338	ENSG00000135677	0.512384	unchanged
3222.09	-0.238573	0.0987198	-2.41667	0.0156632	0.30815	ENSG00000123144	0.511238	unchanged
3027.63	-0.30668	0.126939	-2.41595	0.015694	0.308415	ENSG00000204262	0.510865	unchanged
136.365	-0.989382	0.409501	-2.41607	0.0156891	0.308415	ENSG00000168060	0.510865	unchanged
1780.78	-0.384995	0.159389	-2.41544	0.0157161	0.308507	ENSG00000143256	0.510735	unchanged
1075.12	0.396648	0.16421	2.41548	0.0157143	0.308507	ENSG00000079819	0.510735	unchanged
2598.02	-0.333932	0.138274	-2.415	0.0157354	0.308544	ENSG00000164038	0.510683	unchanged
2286.12	0.389767	0.161392	2.41503	0.0157338	0.308544	ENSG00000108389	0.510683	unchanged
786.433	-0.408221	0.169088	-2.41426	0.0157674	0.30883	ENSG00000135632	0.510281	unchanged
3020.22	-0.325802	0.134943	-2.41437	0.0157626	0.30883	ENSG00000127328	0.510281	unchanged
1321.88	0.483893	0.200549	2.41285	0.0158285	0.309857	ENSG00000196821	0.508839	unchanged
3116.17	0.232938	0.096576	2.41196	0.0158669	0.310095	ENSG00000169504	0.508505	unchanged
10569.8	-0.313125	0.129808	-2.41221	0.0158563	0.310095	ENSG00000120756	0.508505	unchanged
1521.36	-0.398896	0.165382	-2.41197	0.0158667	0.310095	ENSG00000166171	0.508505	unchanged
22.9725	2.40733	0.998295	2.41144	0.0158897	0.31037	ENSG00000119915	0.50812	unchanged
1346.97	-0.307879	0.127687	-2.4112	0.0159003	0.310406	ENSG00000106245	0.50807	unchanged
1728.57	0.335894	0.139326	2.41085	0.0159154	0.31053	ENSG00000182197	0.507896	unchanged
4758.6	-0.280228	0.116286	-2.40983	0.0159602	0.311061	ENSG00000127445	0.507154	unchanged
2863.56	-0.233391	0.0968478	-2.40988	0.0159579	0.311061	ENSG00000130312	0.507154	unchanged
1230.61	0.337522	0.140161	2.4081	0.0160357	0.312362	ENSG00000254087	0.505341	unchanged
243.453	1.05027	0.436241	2.40755	0.0160602	0.312666	ENSG00000189057	0.504919	unchanged
10.5322	4.07173	1.6919	2.4066	0.0161019	0.313308	ENSG00000246731	0.504028	unchanged
15.6223	-2.28908	0.951301	-2.40627	0.0161166	0.313421	ENSG00000231528	0.503872	unchanged
23.4352	2.63395	1.09475	2.40598	0.0161292	0.313463	ENSG00000145242	0.503813	unchanged
8037.48	-0.241638	0.100439	-2.40582	0.0161364	0.313463	ENSG00000174851	0.503813	unchanged
10960.9	-0.365895	0.152147	-2.40488	0.0161776	0.314092	ENSG00000156261	0.502944	unchanged
1038.73	-0.283075	0.11772	-2.40465	0.0161879	0.31412	ENSG00000011105	0.502904	unchanged
8.5489	-4.48024	1.86431	-2.40316	0.0162539	0.315227	ENSG00000227911	0.501376	unchanged
80.3742	1.03416	0.430374	2.40293	0.0162643	0.315257	ENSG00000227268	0.501335	unchanged
823.704	0.32152	0.133819	2.40264	0.016277	0.315331	ENSG00000072201	0.501233	unchanged
8014.72	-0.325499	0.135501	-2.40219	0.0162972	0.315378	ENSG00000104408	0.501168	unchanged
367.713	0.481028	0.20023	2.40238	0.0162889	0.315378	ENSG00000166439	0.501168	unchanged
37.6396	-1.50449	0.626406	-2.40178	0.0163156	0.315562	ENSG00000178776	0.500916	unchanged
44.6263	1.57927	0.657793	2.40086	0.0163566	0.316183	ENSG00000170482	0.500062	unchanged
2200.65	-0.257872	0.107489	-2.39906	0.016437	0.317565	ENSG00000054148	0.498167	unchanged
792.613	-0.347438	0.144851	-2.3986	0.0164581	0.317628	ENSG00000051596	0.498082	unchanged
1265.37	-0.376081	0.156792	-2.39859	0.0164582	0.317628	ENSG00000141526	0.498082	unchanged
3.80896	-5.04236	2.10328	-2.39738	0.016513	0.317629	ENSG00000249307	0.49808	unchanged
3477.96	0.272609	0.113684	2.39796	0.0164866	0.317629	ENSG00000198932	0.49808	unchanged
4732.4	0.249794	0.104223	2.39673	0.0165419	0.317629	ENSG00000047249	0.49808	unchanged
1286.86	0.294565	0.122837	2.39801	0.0164843	0.317629	ENSG00000104365	0.49808	unchanged
5394.14	-0.254222	0.106072	-2.39668	0.0165443	0.317629	ENSG00000166033	0.49808	unchanged
11368.5	-0.339419	0.141632	-2.39649	0.016553	0.317629	ENSG00000166226	0.49808	unchanged
3304.38	0.294872	0.122988	2.39756	0.0165046	0.317629	ENSG00000141027	0.49808	unchanged
3622.47	-0.288086	0.120197	-2.39678	0.01654	0.317629	ENSG00000101773	0.49808	unchanged
776.666	0.394862	0.164719	2.39718	0.016522	0.317629	ENSG00000149346	0.49808	unchanged
3582.11	-0.232986	0.0971671	-2.39778	0.0164946	0.317629	ENSG00000170906	0.49808	unchanged
1656.65	-0.273135	0.113977	-2.39641	0.0165567	0.317629	ENSG00000189306	0.49808	unchanged
443.682	-0.488068	0.203725	-2.39572	0.0165879	0.317935	ENSG00000224568	0.497662	unchanged
969.446	-0.39639	0.165462	-2.39566	0.0165906	0.317935	ENSG00000130023	0.497662	unchanged
708.154	0.501646	0.209515	2.39431	0.0166515	0.318309	ENSG00000187554	0.497151	unchanged
30.1676	-2.88417	1.20463	-2.39424	0.0166549	0.318309	ENSG00000142661	0.497151	unchanged
1111.64	0.395366	0.165132	2.39425	0.0166544	0.318309	ENSG00000164307	0.497151	unchanged
151.641	-0.631242	0.263601	-2.39469	0.0166344	0.318309	ENSG00000289339	0.497151	unchanged
3.5703	-4.37037	1.82487	-2.3949	0.016625	0.318309	ENSG00000222915	0.497151	unchanged
87.1274	1.10881	0.463327	2.39315	0.0167044	0.318742	ENSG00000109667	0.496561	unchanged
987.022	0.610625	0.255156	2.39315	0.0167045	0.318742	ENSG00000132256	0.496561	unchanged
3919.61	0.213479	0.0892036	2.39317	0.0167036	0.318742	ENSG00000139726	0.496561	unchanged
1410.05	-0.292772	0.12241	-2.39174	0.0167688	0.319023	ENSG00000130762	0.496178	unchanged
34500.9	-0.282976	0.118328	-2.39145	0.0167822	0.319023	ENSG00000115310	0.496178	unchanged
3018.73	-0.389677	0.162942	-2.39151	0.0167792	0.319023	ENSG00000134330	0.496178	unchanged
2239.96	0.297314	0.124307	2.39177	0.0167674	0.319023	ENSG00000037474	0.496178	unchanged
2289.55	0.342259	0.14309	2.39191	0.0167611	0.319023	ENSG00000013374	0.496178	unchanged
19028	-0.381356	0.159462	-2.39151	0.0167791	0.319023	ENSG00000136888	0.496178	unchanged
3921.05	-0.293142	0.122523	-2.39254	0.0167322	0.319023	ENSG00000167085	0.496178	unchanged
584.768	0.563701	0.235781	2.39079	0.0168124	0.319426	ENSG00000100483	0.49563	unchanged
2650.72	0.365345	0.152913	2.38923	0.0168836	0.320607	ENSG00000114374	0.494027	unchanged
4296.9	0.230507	0.0964963	2.38877	0.0169051	0.320844	ENSG00000085563	0.493706	unchanged
5368.28	-0.318488	0.133361	-2.38816	0.0169329	0.321085	ENSG00000054116	0.49338	unchanged
1783.6	0.298437	0.124969	2.3881	0.0169359	0.321085	ENSG00000105879	0.49338	unchanged
10162.9	-0.349024	0.146193	-2.38742	0.0169673	0.321509	ENSG00000168032	0.492806	unchanged
123.409	0.890384	0.373058	2.38672	0.0169996	0.321777	ENSG00000255931	0.492445	unchanged
5785	-0.211127	0.0884549	-2.38684	0.0169941	0.321777	ENSG00000103502	0.492445	unchanged
23.4755	-1.83029	0.767073	-2.38607	0.0170295	0.322057	ENSG00000143494	0.492068	unchanged
1498.27	0.343617	0.144013	2.38601	0.0170325	0.322057	ENSG00000125398	0.492068	unchanged
783.894	0.400984	0.168109	2.38526	0.017067	0.322538	ENSG00000144228	0.49142	unchanged
17882.3	-0.398277	0.167018	-2.38463	0.0170962	0.322918	ENSG00000125356	0.490908	unchanged
8742.38	-0.358084	0.150251	-2.38324	0.0171609	0.323915	ENSG00000134248	0.489569	unchanged
10388.3	0.20667	0.086723	2.38311	0.0171673	0.323915	ENSG00000111540	0.489569	unchanged
4959.98	-0.337289	0.141573	-2.38243	0.0171988	0.324337	ENSG00000185721	0.489004	unchanged
1082.36	0.422321	0.177282	2.38219	0.0172099	0.324375	ENSG00000147124	0.488953	unchanged
2272.64	-0.266258	0.111819	-2.38115	0.0172589	0.325124	ENSG00000141985	0.487951	unchanged
6055.63	-0.274428	0.115278	-2.38058	0.0172856	0.325455	ENSG00000128524	0.487509	unchanged
2297.76	0.285518	0.11997	2.3799	0.0173173	0.325878	ENSG00000163681	0.486944	unchanged
2183.95	-0.29984	0.126001	-2.37967	0.0173283	0.325914	ENSG00000116809	0.486898	unchanged
2339.3	0.202275	0.0850166	2.37924	0.0173483	0.325944	ENSG00000147548	0.486857	unchanged
2052.23	0.309475	0.130072	2.37927	0.0173472	0.325944	ENSG00000130844	0.486857	unchanged
5.25255	-5.06689	2.13007	-2.37874	0.0173718	0.32605	ENSG00000213057	0.486716	unchanged
1587.15	0.375715	0.157948	2.37873	0.0173723	0.32605	ENSG00000197594	0.486716	unchanged
16377.9	-0.230077	0.0967597	-2.37782	0.0174152	0.326584	ENSG00000169100	0.486005	unchanged
7203.39	-0.294302	0.123774	-2.37774	0.0174192	0.326584	ENSG00000166295	0.486005	unchanged
71229.7	-0.351948	0.148055	-2.37715	0.017447	0.32688	ENSG00000143933	0.485612	unchanged
3457.24	-0.288892	0.121536	-2.37702	0.0174534	0.32688	ENSG00000136270	0.485612	unchanged
6.46833	3.64113	1.53286	2.37538	0.0175308	0.328158	ENSG00000167524	0.483918	unchanged
290.507	-0.546843	0.230253	-2.37496	0.0175508	0.328359	ENSG00000230387	0.483652	unchanged
4.39468	5.54473	2.33516	2.37446	0.0175747	0.328632	ENSG00000139767	0.48329	unchanged
1614.66	0.316704	0.133415	2.37384	0.0176044	0.329014	ENSG00000114861	0.482786	unchanged
1854.16	0.282672	0.119106	2.37328	0.0176307	0.329332	ENSG00000152642	0.482366	unchanged
14043.9	-0.293884	0.123865	-2.37263	0.0176622	0.329573	ENSG00000014824	0.482048	unchanged
10376.2	-0.212766	0.0896742	-2.37265	0.0176609	0.329573	ENSG00000099341	0.482048	unchanged
3070.13	0.371992	0.156801	2.37239	0.0176736	0.329613	ENSG00000060709	0.481995	unchanged
133.141	-0.858063	0.361784	-2.37176	0.0177037	0.329828	ENSG00000120659	0.481712	unchanged
6174.37	-0.229239	0.0966512	-2.37182	0.0177008	0.329828	ENSG00000121073	0.481712	unchanged
7.10549	-2.8033	1.1821	-2.37146	0.017718	0.32992	ENSG00000279799	0.481591	unchanged
186.592	-0.64492	0.272051	-2.37058	0.0177601	0.330532	ENSG00000205791	0.480786	unchanged
611.362	0.415186	0.17518	2.37005	0.0177857	0.330834	ENSG00000151576	0.480389	unchanged
280.432	0.727899	0.30721	2.36938	0.0178177	0.331191	ENSG00000128604	0.479921	unchanged
404.599	0.458674	0.193594	2.36926	0.0178235	0.331191	ENSG00000186073	0.479921	unchanged
2939.41	-0.287025	0.121183	-2.36852	0.0178594	0.33151	ENSG00000018510	0.479503	unchanged
859.099	0.31859	0.134501	2.36868	0.0178516	0.33151	ENSG00000135457	0.479503	unchanged
2490.98	0.420145	0.17748	2.36728	0.0179194	0.331937	ENSG00000198589	0.478944	unchanged
471.392	-0.414524	0.175106	-2.36727	0.0179198	0.331937	ENSG00000166529	0.478944	unchanged
167.546	-0.63874	0.269818	-2.3673	0.0179184	0.331937	ENSG00000186010	0.478944	unchanged
103.927	-1.03293	0.436267	-2.36765	0.0179013	0.331937	ENSG00000290915	0.478944	unchanged
2577.9	-0.25973	0.109735	-2.36689	0.0179382	0.332104	ENSG00000115649	0.478726	unchanged
1054.82	0.360308	0.152253	2.36651	0.0179568	0.332166	ENSG00000066032	0.478645	unchanged
573.495	-0.627199	0.265039	-2.36644	0.0179602	0.332166	ENSG00000137760	0.478645	unchanged
372.262	0.836377	0.353628	2.36513	0.0180236	0.333164	ENSG00000257743	0.477342	unchanged
34.4653	-2.29267	0.969932	-2.36374	0.0180914	0.333903	ENSG00000211452	0.47638	unchanged
5195.4	0.261117	0.11046	2.3639	0.0180835	0.333903	ENSG00000155016	0.47638	unchanged
641.256	0.445784	0.188593	2.36373	0.0180918	0.333903	ENSG00000165312	0.47638	unchanged
434.995	0.493609	0.208881	2.36311	0.0181221	0.334289	ENSG00000119547	0.475877	unchanged
3543.22	0.356131	0.150743	2.36251	0.0181519	0.334664	ENSG00000130338	0.475391	unchanged
1422.18	-0.316814	0.134138	-2.36185	0.018184	0.334822	ENSG00000152082	0.475186	unchanged
373.33	-0.547583	0.231855	-2.36175	0.0181888	0.334822	ENSG00000150722	0.475186	unchanged
1867.9	0.399252	0.169032	2.36199	0.018177	0.334822	ENSG00000165806	0.475186	unchanged
18341.4	0.204736	0.0867291	2.36063	0.0182437	0.335659	ENSG00000131238	0.474101	unchanged
418.496	-0.449133	0.190367	-2.3593	0.0183093	0.336693	ENSG00000115841	0.472766	unchanged
3585.44	-0.285401	0.12101	-2.35849	0.0183494	0.337229	ENSG00000114416	0.472075	unchanged
13242.3	-0.36437	0.154504	-2.35833	0.0183575	0.337229	ENSG00000136810	0.472075	unchanged
851.874	-0.3832	0.162506	-2.35807	0.0183703	0.337289	ENSG00000161677	0.471998	unchanged
86.548	1.0234	0.43414	2.35731	0.0184078	0.337804	ENSG00000260838	0.471336	unchanged
8206.75	-0.371089	0.157519	-2.35584	0.0184807	0.338121	ENSG00000138777	0.470928	unchanged
1379.99	0.393192	0.166897	2.3559	0.018478	0.338121	ENSG00000130396	0.470928	unchanged
3.05887	-7.06456	2.99852	-2.35602	0.0184721	0.338121	ENSG00000254842	0.470928	unchanged
4056.65	-0.243795	0.103446	-2.35672	0.018437	0.338121	ENSG00000125445	0.470928	unchanged
1729.58	0.333744	0.14163	2.35644	0.0184508	0.338121	ENSG00000141385	0.470928	unchanged
269.753	-0.638414	0.270995	-2.35581	0.0184823	0.338121	ENSG00000256229	0.470928	unchanged
30.0239	2.63611	1.11946	2.3548	0.0185329	0.338524	ENSG00000183091	0.470411	unchanged
1197.74	-0.397933	0.168979	-2.35493	0.0185262	0.338524	ENSG00000079257	0.470411	unchanged
3800.66	-0.344115	0.146131	-2.35485	0.0185303	0.338524	ENSG00000072849	0.470411	unchanged
2909.22	-0.287219	0.12208	-2.35272	0.0186368	0.340246	ENSG00000144895	0.468207	unchanged
2476.29	-0.259436	0.110301	-2.35207	0.0186692	0.340487	ENSG00000144136	0.467899	unchanged
2193.66	-0.309936	0.131764	-2.35221	0.0186622	0.340487	ENSG00000164068	0.467899	unchanged
1264.47	-0.281598	0.119754	-2.35148	0.018699	0.34064	ENSG00000172456	0.467704	unchanged
7.95666	5.0875	2.16367	2.35133	0.0187064	0.34064	ENSG00000233436	0.467704	unchanged
1148.64	-0.301316	0.128142	-2.35143	0.0187016	0.34064	ENSG00000008710	0.467704	unchanged
10458.9	0.288312	0.122666	2.35039	0.0187538	0.341154	ENSG00000157978	0.467049	unchanged
1678.96	0.40526	0.172414	2.3505	0.0187483	0.341154	ENSG00000179051	0.467049	unchanged
1078.12	-0.469203	0.19971	-2.34943	0.0188023	0.341861	ENSG00000170044	0.46615	unchanged
134.255	1.05784	0.450316	2.34911	0.0188185	0.34198	ENSG00000129514	0.465999	unchanged
1014.26	0.329763	0.140394	2.34885	0.0188317	0.342046	ENSG00000121104	0.465916	unchanged
233.079	-0.629382	0.26801	-2.34835	0.0188569	0.342327	ENSG00000112559	0.465559	unchanged
1214.77	-0.47498	0.202334	-2.3475	0.0188998	0.34293	ENSG00000143387	0.464794	unchanged
3946.91	-0.279008	0.118894	-2.3467	0.0189406	0.342936	ENSG00000117143	0.464786	unchanged
828.467	-0.379538	0.161765	-2.34623	0.0189644	0.342936	ENSG00000154079	0.464786	unchanged
199.905	0.679734	0.289656	2.3467	0.0189407	0.342936	ENSG00000112406	0.464786	unchanged
2179.55	-0.309889	0.132063	-2.34652	0.0189497	0.342936	ENSG00000104671	0.464786	unchanged
118.608	-0.768837	0.327575	-2.34706	0.0189225	0.342936	ENSG00000099869	0.464786	unchanged
23959.2	-0.3044	0.129744	-2.34616	0.0189677	0.342936	ENSG00000074696	0.464786	unchanged
27.7168	1.82249	0.776719	2.34639	0.0189562	0.342936	ENSG00000130518	0.464786	unchanged
82.4111	-1.74657	0.744977	-2.34445	0.0190549	0.344337	ENSG00000147041	0.463016	unchanged
688.672	-0.343746	0.146658	-2.34387	0.0190848	0.344701	ENSG00000106305	0.462558	unchanged
21.5459	-2.60802	1.11281	-2.34363	0.0190973	0.344752	ENSG00000166450	0.462493	unchanged
5050.55	-0.359146	0.153311	-2.34259	0.0191502	0.345355	ENSG00000113643	0.461734	unchanged
1496.38	-0.379392	0.161952	-2.34263	0.0191485	0.345355	ENSG00000125775	0.461734	unchanged
4473.41	0.363948	0.155407	2.3419	0.0191856	0.345683	ENSG00000122126	0.461322	unchanged
50.4384	-1.74063	0.743266	-2.34186	0.0191878	0.345683	ENSG00000196932	0.461322	unchanged
6789.31	0.279339	0.119302	2.34145	0.0192092	0.345718	ENSG00000185002	0.461278	unchanged
5.88246	5.31605	2.27031	2.34156	0.0192035	0.345718	ENSG00000173714	0.461278	unchanged
365.43	-0.521123	0.22263	-2.34075	0.0192449	0.346183	ENSG00000139278	0.460694	unchanged
242.915	-0.677883	0.289747	-2.33957	0.0193059	0.347083	ENSG00000160949	0.459567	unchanged
2238.59	0.592457	0.253251	2.33941	0.0193144	0.347083	ENSG00000132109	0.459567	unchanged
2485.41	0.376869	0.161156	2.33853	0.0193596	0.347719	ENSG00000124151	0.458772	unchanged
3068.84	-0.263515	0.11271	-2.33798	0.0193882	0.348055	ENSG00000108039	0.458352	unchanged
4.44903	3.91724	1.67574	2.33762	0.0194072	0.34822	ENSG00000252965	0.458146	unchanged
840.341	-0.390519	0.167122	-2.33672	0.0194536	0.348525	ENSG00000143224	0.457766	unchanged
485.422	-0.404045	0.172911	-2.33673	0.0194535	0.348525	ENSG00000070950	0.457766	unchanged
1583.29	-0.332351	0.142207	-2.33709	0.0194346	0.348525	ENSG00000100938	0.457766	unchanged
544.01	-0.496833	0.21266	-2.33628	0.0194768	0.348764	ENSG00000104863	0.457468	unchanged
1634.64	0.365944	0.156682	2.33559	0.0195129	0.349234	ENSG00000162949	0.456883	unchanged
3749.83	0.222077	0.0951294	2.33447	0.0195712	0.350101	ENSG00000109436	0.455806	unchanged
696.492	-0.547507	0.234583	-2.33396	0.0195978	0.350257	ENSG00000148344	0.455614	unchanged
12748	-0.312795	0.134021	-2.33393	0.0195996	0.350257	ENSG00000100422	0.455614	unchanged
159.535	-0.764769	0.327741	-2.33345	0.0196244	0.350347	ENSG00000102755	0.455502	unchanged
243.957	-0.57222	0.245209	-2.3336	0.0196165	0.350347	ENSG00000177374	0.455502	unchanged
319.502	-0.54949	0.23563	-2.332	0.0197005	0.350616	ENSG00000189171	0.455168	unchanged
650.336	0.468301	0.200877	2.33129	0.0197383	0.350616	ENSG00000171385	0.455168	unchanged
278.237	0.772754	0.331304	2.33246	0.0196763	0.350616	ENSG00000114859	0.455168	unchanged
1193.95	0.345841	0.148277	2.33239	0.01968	0.350616	ENSG00000175104	0.455168	unchanged
20317.2	0.285892	0.122604	2.33183	0.0197099	0.350616	ENSG00000165507	0.455168	unchanged
2762.93	0.319032	0.136801	2.33208	0.0196965	0.350616	ENSG00000139697	0.455168	unchanged
6.96759	4.35977	1.8701	2.3313	0.0197375	0.350616	ENSG00000233273	0.455168	unchanged
26.5451	1.35562	0.581187	2.3325	0.0196746	0.350616	ENSG00000291272	0.455168	unchanged
184.373	0.652736	0.279985	2.33132	0.0197364	0.350616	ENSG00000179859	0.455168	unchanged
706.805	0.359716	0.154271	2.33171	0.0197158	0.350616	ENSG00000196236	0.455168	unchanged
2103.53	-0.358467	0.15396	-2.32831	0.0198958	0.352579	ENSG00000081870	0.452744	unchanged
[truncated: 36,476 more rows]

## Sheet: shCHD4 vs. Control
baseMean	log2FoldChange	lfcSE	stat	pvalue	padj	ensembl_gene_id	negLog10Padj	color
3.90956	-40.6335	3.33121	-12.1978	3.19215e-34	1.1093e-29	ENSG00000140090	28.9549	down
4.47025	-30.7394	3.3376	-9.21005	3.25976e-20	5.664e-16	ENSG00000163518	15.2469	down
1.06189	38.6572	4.3153	8.95817	3.30102e-19	1.9119e-15	ENSG00000290794	14.7185	up
0.875868	-38.7523	4.31753	-8.97558	2.81873e-19	1.9119e-15	ENSG00000228815	14.7185	down
1.32779	-38.7656	4.3105	-8.99331	2.39894e-19	1.9119e-15	ENSG00000147223	14.7185	down
0.857783	38.8277	4.31758	8.99294	2.40706e-19	1.9119e-15	ENSG00000165606	14.7185	up
2.04313	38.4414	4.3054	8.92866	4.31209e-19	2.14071e-15	ENSG00000285534	14.6694	up
1.78121	-38.2691	4.30413	-8.89124	6.04285e-19	2.62494e-15	ENSG00000230778	14.5809	down
0.906481	38.1188	4.31641	8.83113	1.03619e-18	3.60086e-15	ENSG00000243347	14.4436	up
0.981232	38.1529	4.31535	8.84122	9.46823e-19	3.60086e-15	ENSG00000265046	14.4436	up
0.819546	-38.0223	4.31838	-8.80476	1.31135e-18	4.11405e-15	ENSG00000287410	14.3857	down
1214.9	-1.15937	0.13181	-8.79578	1.42064e-18	4.11405e-15	ENSG00000116032	14.3857	down
0.931911	37.6207	4.31578	8.717	2.85675e-18	7.63652e-15	ENSG00000237614	14.1171	up
0.8167	37.5055	4.32287	8.67606	4.09704e-18	1.01697e-14	ENSG00000245719	13.9927	up
0.86626	37.3567	4.31967	8.64804	5.23929e-18	1.2138e-14	ENSG00000281100	13.9159	up
0.5734	-37.3506	4.32625	-8.63349	5.9509e-18	1.2925e-14	ENSG00000233936	13.8886	down
1.43463	-37.2994	4.3497	-8.57515	9.89566e-18	2.02285e-14	ENSG00000184302	13.694	down
2.14632	-35.9214	4.19343	-8.56613	1.07024e-17	2.06622e-14	ENSG00000279778	13.6848	down
1.63397	36.638	4.32858	8.46419	2.57933e-17	4.71759e-14	ENSG00000224172	13.3263	up
1.35972	36.3966	4.31005	8.44459	3.05121e-17	5.30162e-14	ENSG00000225649	13.2756	up
1.2262	36.3409	4.31075	8.43031	3.44746e-17	5.70488e-14	ENSG00000180316	13.2438	up
0.736086	-36.0758	4.32408	-8.343	7.24278e-17	1.14406e-13	ENSG00000263443	12.9416	down
1.38844	35.8756	4.31207	8.3198	8.81146e-17	1.33133e-13	ENSG00000260455	12.8757	up
0.544321	35.6239	4.3288	8.22951	1.87977e-16	2.72182e-13	ENSG00000248456	12.5651	up
1.07914	35.6398	4.3383	8.21515	2.11904e-16	2.94555e-13	ENSG00000171060	12.5308	up
0.556377	-35.5165	4.32824	-8.20576	2.29137e-16	3.06259e-13	ENSG00000226229	12.5139	down
1.20515	35.344	4.3207	8.18017	2.83445e-16	3.64815e-13	ENSG00000205424	12.4379	up
0.721585	-35.3049	4.32475	-8.16346	3.25549e-16	4.04042e-13	ENSG00000251292	12.3936	down
0.737026	-35.075	4.31991	-8.11936	4.68639e-16	5.61575e-13	ENSG00000232903	12.2506	down
0.800609	34.6193	4.32944	7.99625	1.28267e-15	1.48581e-12	ENSG00000182000	11.828	up
0.809085	34.4957	4.34111	7.9463	1.92171e-15	2.13855e-12	ENSG00000282304	11.6699	up
0.886793	-34.3369	4.32277	-7.94327	1.96926e-15	2.13855e-12	ENSG00000186105	11.6699	down
0.535844	34.3286	4.32741	7.93284	2.14192e-15	2.25557e-12	ENSG00000250081	11.6467	up
0.734663	34.3568	4.34063	7.91517	2.46925e-15	2.52379e-12	ENSG00000156886	11.5979	up
0.572929	-32.583	4.32766	-7.52899	5.11326e-14	5.07688e-11	ENSG00000135898	10.2944	down
2.04762	-28.2491	3.75719	-7.51868	5.53334e-14	5.34136e-11	ENSG00000225179	10.2723	down
0.484698	-32.4001	4.34639	-7.45448	9.02228e-14	8.47388e-11	ENSG00000267079	10.0719	down
2.03922	-30.9117	4.16995	-7.41296	1.2351e-13	1.1295e-10	ENSG00000161180	9.94711	down
3.58606	-19.6371	2.6641	-7.371	1.69354e-13	1.50903e-10	ENSG00000280062	9.8213	down
646.442	1.17606	0.163073	7.21188	5.51826e-13	4.79413e-10	ENSG00000125355	9.31929	up
5.00599	19.8156	2.75508	7.1924	6.36633e-13	5.39601e-10	ENSG00000235295	9.26793	up
1.71047	-30.3309	4.30278	-7.04915	1.8001e-12	1.48941e-09	ENSG00000286017	8.82699	down
2.22923	-29.8267	4.30508	-6.92827	4.2603e-12	3.44302e-09	ENSG00000285887	8.46306	down
1.90976	-29.7159	4.30677	-6.89982	5.20674e-12	4.11226e-09	ENSG00000286741	8.38592	down
2.17385	-28.8967	4.224	-6.84109	7.8595e-12	6.06946e-09	ENSG00000249012	8.21685	down
1.14908	29.267	4.31266	6.7863	1.15043e-11	8.69099e-09	ENSG00000181908	8.06093	up
1.25054	-29.2123	4.31158	-6.77531	1.24141e-11	9.17881e-09	ENSG00000036565	8.03721	down
1.46705	29.1512	4.30944	6.76451	1.33759e-11	9.68388e-09	ENSG00000105549	8.01395	up
1.51771	-29.1048	4.31365	-6.74712	1.50806e-11	1.06952e-08	ENSG00000234174	7.97081	down
1.6371	28.9717	4.30894	6.72363	1.77255e-11	1.23196e-08	ENSG00000006059	7.9094	up
1.06384	28.9248	4.31576	6.70212	2.05412e-11	1.39966e-08	ENSG00000272033	7.85398	up
1.28641	28.9337	4.33099	6.68063	2.37915e-11	1.58996e-08	ENSG00000154342	7.79861	up
0.852568	28.7671	4.31696	6.66373	2.66963e-11	1.75042e-08	ENSG00000223754	7.75686	up
1.47183	28.8072	4.32689	6.65773	2.78097e-11	1.78966e-08	ENSG00000288393	7.74723	up
1.22332	-28.6557	4.3135	-6.64327	3.06804e-11	1.9385e-08	ENSG00000290882	7.71253	down
1.52283	-28.5794	4.31581	-6.62204	3.54281e-11	2.1985e-08	ENSG00000229808	7.65787	down
0.770425	-28.5123	4.32007	-6.59995	4.11284e-11	2.50746e-08	ENSG00000253431	7.60077	down
1.09339	-28.4726	4.32131	-6.58889	4.43122e-11	2.60999e-08	ENSG00000214043	7.58336	down
0.725412	-28.4714	4.32082	-6.58935	4.41768e-11	2.60999e-08	ENSG00000274751	7.58336	down
6328.35	-0.694155	0.1056	-6.57342	4.9172e-11	2.84796e-08	ENSG00000100867	7.54547	unchanged
3.80367	-21.5376	3.28184	-6.56267	5.28526e-11	3.01095e-08	ENSG00000271579	7.5213	down
0.768979	28.3233	4.31955	6.55701	5.48971e-11	3.07698e-08	ENSG00000261003	7.51188	up
0.981153	28.2455	4.32189	6.53545	6.34168e-11	3.44343e-08	ENSG00000223621	7.46301	up
0.954881	-28.2087	4.31612	-6.53567	6.33233e-11	3.44343e-08	ENSG00000273584	7.46301	down
0.98983	28.1194	4.32811	6.49693	8.19781e-11	4.3828e-08	ENSG00000286379	7.35825	up
1.06218	28.082	4.3271	6.48979	8.59546e-11	4.52577e-08	ENSG00000281103	7.34431	up
0.59446	27.9846	4.32565	6.46946	9.83509e-11	5.10118e-08	ENSG00000154646	7.29233	up
0.884461	-27.9261	4.32308	-6.45978	1.04857e-10	5.29914e-08	ENSG00000286782	7.27579	down
5349.99	0.813454	0.125936	6.45926	1.05217e-10	5.29914e-08	ENSG00000130643	7.27579	unchanged
0.758855	-27.9515	4.32973	-6.45572	1.07704e-10	5.34687e-08	ENSG00000250267	7.2719	down
0.742019	27.8502	4.33064	6.43098	1.26787e-10	6.20561e-08	ENSG00000262543	7.20722	up
4131.7	-0.502286	0.0782772	-6.41676	1.39204e-10	6.71871e-08	ENSG00000171223	7.17271	unchanged
0.606328	-27.7004	4.32778	-6.4006	1.54766e-10	7.36748e-08	ENSG00000200959	7.13268	down
0.493988	-27.6638	4.33169	-6.38639	1.69848e-10	7.86985e-08	ENSG00000252622	7.10403	down
0.493988	-27.6638	4.33169	-6.38639	1.69848e-10	7.86985e-08	ENSG00000141371	7.10403	down
0.900682	27.5342	4.31741	6.37747	1.80039e-10	8.23229e-08	ENSG00000254401	7.08448	up
0.757818	-27.5989	4.34148	-6.35701	2.05716e-10	9.28418e-08	ENSG00000259151	7.03226	down
0.513617	-27.5236	4.33128	-6.35462	2.08945e-10	9.30905e-08	ENSG00000290611	7.03109	down
0.654286	27.4972	4.33134	6.34841	2.17546e-10	9.55119e-08	ENSG00000248968	7.01994	up
1.2367	27.4014	4.31738	6.34677	2.19877e-10	9.55119e-08	ENSG00000233420	7.01994	up
0.825094	27.5111	4.34112	6.33733	2.33785e-10	9.91353e-08	ENSG00000235700	7.00377	up
0.65484	27.4151	4.32603	6.33724	2.33924e-10	9.91353e-08	ENSG00000287488	7.00377	up
2.46229	27.2623	4.30588	6.33142	2.42908e-10	1.01702e-07	ENSG00000280109	6.99267	up
0.599802	-27.3778	4.33307	-6.31832	2.64419e-10	1.09391e-07	ENSG00000171936	6.96102	down
1106.21	1.21319	0.192153	6.31367	2.72496e-10	1.11406e-07	ENSG00000124780	6.95309	up
0.576811	27.2928	4.33368	6.29784	3.01829e-10	1.21963e-07	ENSG00000270149	6.91377	up
0.982447	27.0698	4.31498	6.27345	3.53135e-10	1.41055e-07	ENSG00000279187	6.85061	up
0.655394	27.0331	4.32358	6.25248	4.03994e-10	1.55991e-07	ENSG00000229727	6.8069	up
0.655394	27.0331	4.32358	6.25248	4.03994e-10	1.55991e-07	ENSG00000234504	6.8069	up
0.655394	27.0331	4.32358	6.25248	4.03994e-10	1.55991e-07	ENSG00000179219	6.8069	up
0.577283	27.0841	4.34491	6.23353	4.5605e-10	1.74156e-07	ENSG00000251138	6.75906	up
0.603916	-26.8845	4.32776	-6.21211	5.22777e-10	1.93266e-07	ENSG00000241231	6.71384	down
2100.63	-1.22868	0.197783	-6.21227	5.22254e-10	1.93266e-07	ENSG00000175868	6.71384	down
0.603916	-26.8845	4.32776	-6.21211	5.22777e-10	1.93266e-07	ENSG00000279463	6.71384	down
0.514121	-26.8859	4.33501	-6.20203	5.57387e-10	1.95654e-07	ENSG00000279107	6.70851	down
0.524279	-26.8942	4.33498	-6.20399	5.5051e-10	1.95654e-07	ENSG00000231817	6.70851	down
0.514121	-26.8859	4.33501	-6.20203	5.57387e-10	1.95654e-07	ENSG00000243370	6.70851	down
0.524279	-26.8942	4.33498	-6.20399	5.5051e-10	1.95654e-07	ENSG00000213876	6.70851	down
0.524279	-26.8942	4.33498	-6.20399	5.5051e-10	1.95654e-07	ENSG00000290058	6.70851	down
5528.77	-0.52371	0.0844693	-6.2	5.64638e-10	1.96217e-07	ENSG00000123416	6.70726	unchanged
0.490576	26.8856	4.34616	6.18605	6.16917e-10	2.10181e-07	ENSG00000287581	6.67741	up
0.490576	26.8856	4.34616	6.18605	6.16917e-10	2.10181e-07	ENSG00000275046	6.67741	up
0.517198	-26.7636	4.33544	-6.1732	6.69204e-10	2.23611e-07	ENSG00000236627	6.65051	down
0.517198	-26.7636	4.33544	-6.1732	6.69204e-10	2.23611e-07	ENSG00000229543	6.65051	down
1.31426	26.5207	4.30281	6.16356	7.11259e-10	2.35399e-07	ENSG00000207577	6.62819	up
0.954401	26.4851	4.31661	6.13561	8.48309e-10	2.78109e-07	ENSG00000230316	6.55578	up
8365.16	-0.57111	0.0932271	-6.12601	9.0112e-10	2.92662e-07	ENSG00000120725	6.53363	unchanged
0.736972	26.4525	4.32162	6.12097	9.30073e-10	2.99268e-07	ENSG00000141096	6.52394	up
0.693712	-26.4062	4.32342	-6.10772	1.01062e-09	3.22204e-07	ENSG00000255693	6.49187	down
3.01207	-23.3517	3.83263	-6.09285	1.10918e-09	3.50411e-07	ENSG00000162598	6.45542	down
0.783507	-26.2383	4.32035	-6.07318	1.25404e-09	3.92605e-07	ENSG00000268992	6.40604	down
0.616267	26.2112	4.33217	6.05037	1.44515e-09	4.48397e-07	ENSG00000188280	6.34834	up
1.11183	-26.0906	4.3158	-6.04537	1.49069e-09	4.58433e-07	ENSG00000070808	6.33872	down
1547.94	-0.789574	0.131325	-6.01236	1.82841e-09	5.5736e-07	ENSG00000196104	6.25386	unchanged
0.987111	25.9801	4.32754	6.00343	1.93186e-09	5.83775e-07	ENSG00000260664	6.23375	up
0.964065	-25.785	4.30933	-5.98353	2.18359e-09	6.54154e-07	ENSG00000225173	6.18432	down
4.73187	22.659	3.81462	5.94006	2.84923e-09	8.3995e-07	ENSG00000092345	6.07575	up
1.14949	25.701	4.32684	5.93989	2.85212e-09	8.3995e-07	ENSG00000164270	6.07575	up
2.21756	25.76	4.35173	5.91948	3.22953e-09	9.43105e-07	ENSG00000166159	6.02544	up
0.902343	25.5464	4.31724	5.91731	3.27254e-09	9.47702e-07	ENSG00000273013	6.02333	up
0.432543	-25.5799	4.339	-5.89534	3.73913e-09	1.06358e-06	ENSG00000221216	5.97323	down
0.432543	-25.5799	4.339	-5.89534	3.73913e-09	1.06358e-06	ENSG00000254810	5.97323	down
0.657999	25.4872	4.32409	5.89422	3.76451e-09	1.06358e-06	ENSG00000240925	5.97323	up
4.31591	17.8628	3.03163	5.89213	3.81258e-09	1.06848e-06	ENSG00000132874	5.97124	up
0.510006	-25.5253	4.34595	-5.87337	4.27029e-09	1.17966e-06	ENSG00000227215	5.92824	down
9.60961	25.0196	4.26004	5.8731	4.27721e-09	1.17966e-06	ENSG00000183638	5.92824	up
5508.61	-0.672644	0.114624	-5.86825	4.40417e-09	1.20511e-06	ENSG00000141753	5.91897	unchanged
0.736418	25.341	4.32454	5.85981	4.63408e-09	1.24836e-06	ENSG00000290918	5.90366	up
0.736418	25.341	4.32454	5.85981	4.63408e-09	1.24836e-06	ENSG00000279757	5.90366	up
0.411603	25.3973	4.34049	5.85125	4.87904e-09	1.29429e-06	ENSG00000267402	5.88797	up
0.411603	25.3973	4.34049	5.85125	4.87904e-09	1.29429e-06	ENSG00000269799	5.88797	up
0.522338	-25.3274	4.33129	-5.84754	4.98882e-09	1.31338e-06	ENSG00000280190	5.88161	down
0.434594	-25.3288	4.33957	-5.83672	5.32393e-09	1.38069e-06	ENSG00000240423	5.85991	down
0.434594	-25.3288	4.33957	-5.83672	5.32393e-09	1.38069e-06	ENSG00000287775	5.85991	down
0.441748	25.3628	4.34771	5.83361	5.42406e-09	1.39623e-06	ENSG00000202490	5.85504	up
0.573816	25.2115	4.32687	5.82672	5.65257e-09	1.44436e-06	ENSG00000283175	5.84033	up
0.491684	25.1497	4.33179	5.80584	6.40424e-09	1.62448e-06	ENSG00000283588	5.78929	up
4169.48	0.520294	0.0897582	5.79662	6.76653e-09	1.70394e-06	ENSG00000213853	5.76855	unchanged
0.432416	-25.0529	4.34913	-5.76044	8.38967e-09	2.06773e-06	ENSG00000236928	5.68451	down
0.432416	-25.0529	4.34913	-5.76044	8.38967e-09	2.06773e-06	ENSG00000233760	5.68451	down
0.432416	-25.0529	4.34913	-5.76044	8.38967e-09	2.06773e-06	ENSG00000226447	5.68451	down
1.84261	-22.1116	3.84065	-5.75727	8.54857e-09	2.09205e-06	ENSG00000287423	5.67943	down
0.426388	24.9735	4.34847	5.74306	9.29833e-09	2.25962e-06	ENSG00000222588	5.64596	up
0.80326	-24.8121	4.34141	-5.7152	1.09575e-08	2.63488e-06	ENSG00000231666	5.57924	down
0.741547	24.7163	4.32509	5.71463	1.09941e-08	2.63488e-06	ENSG00000251075	5.57924	up
0.998015	24.7712	4.33885	5.70916	1.13537e-08	2.69174e-06	ENSG00000178645	5.56997	up
833.4	0.640855	0.11226	5.70867	1.13863e-08	2.69174e-06	ENSG00000166912	5.56997	unchanged
0.741481	24.3094	4.32133	5.62545	1.85023e-08	4.34441e-06	ENSG00000232077	5.36207	up
2.99923	18.9023	3.38885	5.57781	2.43571e-08	5.68076e-06	ENSG00000168748	5.24559	up
5709.2	0.735794	0.13246	5.55483	2.77881e-08	6.43775e-06	ENSG00000095932	5.19127	unchanged
1.79749	23.8338	4.30391	5.5377	3.06461e-08	7.02898e-06	ENSG00000273771	5.15311	up
6715.22	-0.572321	0.10336	-5.53714	3.07446e-08	7.02898e-06	ENSG00000130733	5.15311	unchanged
11632.4	0.573935	0.104887	5.47196	4.45096e-08	1.01095e-05	ENSG00000123836	4.99527	unchanged
16690	-0.50404	0.0921609	-5.46912	4.52267e-08	1.02057e-05	ENSG00000166557	4.99116	unchanged
1746.6	-0.5994	0.109894	-5.45436	4.91491e-08	1.10192e-05	ENSG00000153002	4.95785	unchanged
7502.9	-0.682038	0.125758	-5.42343	5.84675e-08	1.30244e-05	ENSG00000116685	4.88524	unchanged
2.45423	23.5333	4.35162	5.40795	6.37501e-08	1.41107e-05	ENSG00000184055	4.85045	up
5.19435	-17.3409	3.22798	-5.37205	7.7845e-08	1.71215e-05	ENSG00000164694	4.76646	down
1.68552	-23.3423	4.35434	-5.36069	8.29034e-08	1.81194e-05	ENSG00000254592	4.74186	down
2.00063	-18.6354	3.47927	-5.35613	8.50228e-08	1.84664e-05	ENSG00000251356	4.73362	down
1962.65	-0.554435	0.104455	-5.30791	1.10888e-07	2.39346e-05	ENSG00000198467	4.62097	unchanged
14806.7	-0.511429	0.0964427	-5.30293	1.13956e-07	2.44449e-05	ENSG00000131143	4.61181	unchanged
1036.2	-0.643664	0.121565	-5.2948	1.19144e-07	2.53049e-05	ENSG00000188760	4.59679	unchanged
2049.69	-0.710892	0.134273	-5.29438	1.19421e-07	2.53049e-05	ENSG00000141873	4.59679	unchanged
1.58643	22.9784	4.35471	5.27668	1.31544e-07	2.77048e-05	ENSG00000226985	4.55745	up
1.96679	-22.9546	4.35548	-5.27029	1.36209e-07	2.85144e-05	ENSG00000259198	4.54494	down
12357.7	-0.412321	0.0788339	-5.23025	1.69279e-07	3.52253e-05	ENSG00000176840	4.45314	unchanged
1.60093	22.4882	4.30321	5.2259	1.73312e-07	3.58497e-05	ENSG00000261795	4.44551	up
10664.5	0.486974	0.0934188	5.21281	1.86006e-07	3.82479e-05	ENSG00000185559	4.41739	unchanged
5724.97	-0.366186	0.0703824	-5.2028	1.96305e-07	4.01281e-05	ENSG00000167588	4.39655	unchanged
5643.69	-0.681017	0.130926	-5.20153	1.97658e-07	4.01685e-05	ENSG00000166741	4.39611	unchanged
68345.4	-0.441916	0.0850469	-5.19614	2.03465e-07	4.11082e-05	ENSG00000102265	4.38607	unchanged
1.65652	22.5951	4.35405	5.18945	2.10913e-07	4.23666e-05	ENSG00000248547	4.37298	up
19344.7	-0.542229	0.104832	-5.17239	2.31123e-07	4.61595e-05	ENSG00000162552	4.33574	unchanged
2.62556	-22.4647	4.35156	-5.16245	2.43741e-07	4.84013e-05	ENSG00000228510	4.31514	down
20196.6	-0.386519	0.0751301	-5.14467	2.67997e-07	5.29157e-05	ENSG00000168003	4.27642	unchanged
3.50671	-18.0418	3.51345	-5.13506	2.82054e-07	5.53766e-05	ENSG00000123901	4.25667	down
2.49219	19.2934	3.7603	5.13083	2.88475e-07	5.6319e-05	ENSG00000273183	4.24935	up
1611.6	-0.490426	0.0968352	-5.06454	4.09378e-07	7.94766e-05	ENSG00000101473	4.09976	unchanged
11522.4	-0.520614	0.103008	-5.05413	4.32357e-07	8.34712e-05	ENSG00000104341	4.07846	unchanged
23175.6	0.444132	0.088234	5.03357	4.81422e-07	9.24304e-05	ENSG00000138207	4.03418	unchanged
2.02539	21.6085	4.3047	5.01975	5.17378e-07	9.87879e-05	ENSG00000287597	4.0053	up
1.25544	-21.8098	4.36146	-5.00058	5.71595e-07	0.000108544	ENSG00000230946	3.9644	down
8742.68	-0.654039	0.131134	-4.98758	6.114e-07	0.000115472	ENSG00000161638	3.93752	unchanged
374.94	-1.31027	0.265643	-4.93245	8.12047e-07	0.000152537	ENSG00000188487	3.81662	down
1.31395	21.2048	4.31222	4.91739	8.77054e-07	0.000163863	ENSG00000288860	3.78552	up
1838.59	-0.506033	0.103174	-4.90466	9.35891e-07	0.000173921	ENSG00000197562	3.75965	unchanged
2410.27	0.744927	0.152074	4.89845	9.65948e-07	0.000177607	ENSG00000166471	3.75054	unchanged
2.25816	-18.0087	3.67575	-4.89934	9.61608e-07	0.000177607	ENSG00000237484	3.75054	down
1958.23	-0.820508	0.168099	-4.8811	1.05496e-06	0.000192952	ENSG00000133110	3.71455	unchanged
10687.5	-0.456707	0.0936171	-4.87845	1.06921e-06	0.000194534	ENSG00000095981	3.711	unchanged
801.889	-0.915486	0.187895	-4.87232	1.10295e-06	0.000199628	ENSG00000137507	3.69978	unchanged
1469.07	0.647747	0.133261	4.86074	1.16948e-06	0.000210573	ENSG00000180182	3.6766	unchanged
1070.21	0.630779	0.129886	4.85641	1.19536e-06	0.000214123	ENSG00000108947	3.66934	unchanged
486.367	-0.923352	0.19071	-4.84167	1.28756e-06	0.000229456	ENSG00000069482	3.6393	unchanged
2551.7	0.588806	0.121783	4.83489	1.33222e-06	0.000236204	ENSG00000135679	3.62671	unchanged
5011.06	-0.485662	0.100488	-4.83304	1.34461e-06	0.00023719	ENSG00000184164	3.6249	unchanged
1.89615	-19.1918	3.97625	-4.82659	1.38888e-06	0.000243762	ENSG00000215841	3.61303	down
1740.87	-0.610737	0.127666	-4.78386	1.71957e-06	0.000300285	ENSG00000159618	3.52247	unchanged
2.29672	20.313	4.25299	4.77617	1.78664e-06	0.000310438	ENSG00000221845	3.50802	up
3367.66	0.595068	0.125129	4.75563	1.97827e-06	0.000342024	ENSG00000164938	3.46594	unchanged
1.08477	-20.7747	4.37206	-4.75169	2.0172e-06	0.000346517	ENSG00000245870	3.46027	down
2355.7	-0.496754	0.104602	-4.74901	2.04414e-06	0.000346517	ENSG00000176170	3.46027	unchanged
5188.8	0.481398	0.101327	4.75095	2.02468e-06	0.000346517	ENSG00000132640	3.46027	unchanged
19049.5	-0.363904	0.0766253	-4.74913	2.0429e-06	0.000346517	ENSG00000142173	3.46027	unchanged
20762.5	-0.586225	0.12349	-4.74715	2.06298e-06	0.000348013	ENSG00000120708	3.4584	unchanged
1.27053	18.1833	3.83858	4.73698	2.16928e-06	0.000364177	ENSG00000278383	3.43869	up
2013.32	-0.57507	0.121767	-4.7227	2.32729e-06	0.000388824	ENSG00000134013	3.41025	unchanged
523.041	-0.931979	0.197749	-4.71293	2.44184e-06	0.000406012	ENSG00000154734	3.39146	unchanged
1.20103	-20.3254	4.31364	-4.71189	2.45425e-06	0.000406131	ENSG00000205899	3.39133	down
1.9238	-20.3398	4.32041	-4.70785	2.50343e-06	0.000412306	ENSG00000285716	3.38478	down
4819.26	-0.69334	0.147464	-4.70175	2.57944e-06	0.000422822	ENSG00000164176	3.37384	unchanged
0.616891	-20.2262	4.31287	-4.68972	2.73575e-06	0.000446338	ENSG00000251361	3.35034	down
1.02479	-20.215	4.31388	-4.68605	2.78529e-06	0.000452297	ENSG00000253593	3.34458	down
4466.81	-0.592502	0.126536	-4.68248	2.83421e-06	0.0004581	ENSG00000228474	3.33904	unchanged
1.58668	-20.2333	4.32607	-4.67707	2.91002e-06	0.000468176	ENSG00000254704	3.32959	down
2464.12	-0.491395	0.105321	-4.66568	3.07594e-06	0.00049259	ENSG00000160752	3.30751	unchanged
0.925027	-20.3329	4.37169	-4.65103	3.30278e-06	0.00052649	ENSG00000285999	3.27861	down
0.919565	-20.2855	4.37206	-4.63981	3.48737e-06	0.000553377	ENSG00000280182	3.25698	down
1.35965	-19.499	4.22114	-4.61935	3.84937e-06	0.000608043	ENSG00000101251	3.21607	down
1.27974	20.2498	4.38832	4.61448	3.94086e-06	0.000619678	ENSG00000259092	3.20783	up
2.16401	17.8267	3.86474	4.61264	3.97586e-06	0.00062098	ENSG00000175518	3.20692	up
0.924916	19.9037	4.31548	4.61217	3.98488e-06	0.00062098	ENSG00000267626	3.20692	up
3806.27	-0.508711	0.110842	-4.58951	4.44286e-06	0.000686195	ENSG00000184500	3.16355	unchanged
0.83685	19.8145	4.31714	4.58973	4.43813e-06	0.000686195	ENSG00000236739	3.16355	up
1.93257	19.7216	4.30294	4.5833	4.57697e-06	0.00070378	ENSG00000279029	3.15256	up
5646.18	-0.498011	0.108941	-4.57138	4.84527e-06	0.000741753	ENSG00000159199	3.12974	unchanged
1518.49	0.487533	0.107016	4.55569	5.2214e-06	0.000795828	ENSG00000138032	3.09918	unchanged
0.767559	19.676	4.32354	4.5509	5.34182e-06	0.000810627	ENSG00000287274	3.09118	up
2706.95	-0.492786	0.108401	-4.54594	5.46896e-06	0.000826313	ENSG00000143314	3.08286	unchanged
19.8068	-4.09678	0.901482	-4.54449	5.5068e-06	0.000828427	ENSG00000254290	3.08175	down
0.888136	19.4018	4.27506	4.53837	5.66895e-06	0.000849145	ENSG00000239670	3.07102	up
2402.54	-0.507195	0.112087	-4.52501	6.03928e-06	0.000900734	ENSG00000129968	3.0454	unchanged
222.23	1.38006	0.305354	4.51955	6.19726e-06	0.000920346	ENSG00000089169	3.03605	up
41300.9	-0.414549	0.09177	-4.51726	6.26442e-06	0.000926361	ENSG00000167552	3.03322	unchanged
1.14035	-19.4929	4.32701	-4.50494	6.63907e-06	0.000973478	ENSG00000224409	3.01167	down
0.686474	-19.5094	4.33011	-4.50551	6.62123e-06	0.000973478	ENSG00000213121	3.01167	down
4747.48	-0.383693	0.0852453	-4.50104	6.76218e-06	0.000987364	ENSG00000128228	3.00552	unchanged
1.03028	-19.3884	4.31406	-4.49423	6.98209e-06	0.00101521	ENSG00000171989	2.99345	down
0.988232	19.7241	4.39531	4.48752	7.20564e-06	0.00104335	ENSG00000257035	2.98157	up
7432.53	-0.561198	0.12523	-4.48134	7.41768e-06	0.00106959	ENSG00000134291	2.97078	unchanged
1.12497	-19.1612	4.27679	-4.48027	7.4549e-06	0.00107052	ENSG00000232934	2.97041	down
0.591427	19.3571	4.32683	4.47374	7.68638e-06	0.00109471	ENSG00000288964	2.9607	up
0.870501	-19.3603	4.32691	-4.47439	7.66307e-06	0.00109471	ENSG00000226450	2.9607	down
0.644574	-19.3605	4.33187	-4.46931	7.84732e-06	0.00110406	ENSG00000287415	2.95701	down
0.644574	-19.3605	4.33187	-4.46931	7.84732e-06	0.00110406	ENSG00000289530	2.95701	down
0.644574	-19.3605	4.33187	-4.46931	7.84732e-06	0.00110406	ENSG00000232437	2.95701	down
326.706	-0.868783	0.194505	-4.46664	7.94579e-06	0.0011134	ENSG00000249746	2.95335	unchanged
6843.32	-0.368149	0.0825536	-4.45952	8.21442e-06	0.00114642	ENSG00000141349	2.94065	unchanged
0.510343	-19.3158	4.33405	-4.45676	8.32068e-06	0.001152	ENSG00000253039	2.93855	down
1.07601	19.2274	4.3138	4.45717	8.30473e-06	0.001152	ENSG00000289526	2.93855	up
1.13538	-19.0102	4.27369	-4.4482	8.65916e-06	0.0011941	ENSG00000289941	2.92296	down
0.853347	-19.5185	4.38955	-4.44658	8.72468e-06	0.00119838	ENSG00000233990	2.9214	down
1400.75	0.607694	0.136792	4.44247	8.89324e-06	0.00121673	ENSG00000170921	2.91481	unchanged
0.50962	19.2221	4.33375	4.43545	9.18806e-06	0.00125213	ENSG00000272703	2.90235	up
977.04	0.92954	0.209847	4.42961	9.44019e-06	0.00128147	ENSG00000078081	2.89229	unchanged
0.761301	19.1076	4.32051	4.42254	9.75474e-06	0.00131902	ENSG00000101890	2.87975	up
2.82309	19.0292	4.30449	4.42079	9.83412e-06	0.00132459	ENSG00000180871	2.87792	up
0.875998	-19.067	4.31799	-4.41571	1.00681e-05	0.00135087	ENSG00000287789	2.86939	down
4251	-0.556345	0.126111	-4.41153	1.02641e-05	0.00137188	ENSG00000122585	2.86268	unchanged
1639.41	-0.529692	0.120133	-4.40922	1.03742e-05	0.00138128	ENSG00000142627	2.85972	unchanged
0.848917	19.03	4.31855	4.40657	1.0502e-05	0.00139296	ENSG00000286305	2.85606	up
1.89152	18.9634	4.30621	4.40373	1.06403e-05	0.00140594	ENSG00000261435	2.85203	up
0.685751	19.0546	4.33006	4.40054	1.07983e-05	0.00142141	ENSG00000254936	2.84728	up
1.34021	18.932	4.30978	4.39279	1.11906e-05	0.00146197	ENSG00000286126	2.83506	up
1.5096	-18.9311	4.30901	-4.39337	1.11607e-05	0.00146197	ENSG00000230051	2.83506	down
295.457	-1.70026	0.38771	-4.3854	1.15774e-05	0.00150684	ENSG00000178752	2.82193	down
10162.9	-0.638946	0.146238	-4.36922	1.24688e-05	0.00161681	ENSG00000168032	2.79134	unchanged
1.04868	18.8926	4.32794	4.36528	1.26962e-05	0.00164017	ENSG00000188408	2.78511	up
4152.4	0.379701	0.0871917	4.35479	1.33195e-05	0.00171432	ENSG00000124226	2.76591	unchanged
0.504326	-18.8459	4.33042	-4.35199	1.34909e-05	0.00172997	ENSG00000235777	2.76196	down
17.5754	5.13412	1.18186	4.34409	1.39855e-05	0.00178681	ENSG00000015592	2.74792	up
1.30264	-16.724	3.85352	-4.33991	1.42539e-05	0.00181442	ENSG00000261210	2.74126	down
15874.1	0.474405	0.109391	4.33677	1.44589e-05	0.00183379	ENSG00000074370	2.73665	unchanged
0.585169	18.7472	4.32533	4.33427	1.46243e-05	0.00184803	ENSG00000286788	2.73329	up
0.676106	-18.9209	4.37282	-4.32694	1.51199e-05	0.00190373	ENSG00000229086	2.72039	down
0.749607	18.8532	4.3591	4.32503	1.52514e-05	0.00191279	ENSG00000274798	2.71833	up
2.59098	18.6122	4.3041	4.3243	1.53019e-05	0.00191279	ENSG00000231256	2.71833	up
2.18743	-18.6133	4.30522	-4.32342	1.53626e-05	0.0019135	ENSG00000286289	2.71817	down
6255.59	-0.358073	0.082855	-4.32168	1.54849e-05	0.00192184	ENSG00000104522	2.71628	unchanged
4675.45	0.428598	0.0992141	4.31993	1.56079e-05	0.00193021	ENSG00000151893	2.71439	unchanged
91322.1	-0.39442	0.0913678	-4.31684	1.58278e-05	0.00195047	ENSG00000148180	2.70986	unchanged
2.27019	-18.5703	4.30491	-4.31375	1.60509e-05	0.00197097	ENSG00000188822	2.70532	down
4629.41	-0.433231	0.100721	-4.30129	1.69808e-05	0.00207781	ENSG00000016864	2.68239	unchanged
1.68421	18.4931	4.3134	4.28735	1.80816e-05	0.00219704	ENSG00000254211	2.65816	up
1.17877	-18.4875	4.31166	-4.28778	1.80465e-05	0.00219704	ENSG00000288533	2.65816	down
1026.46	-0.664859	0.155321	-4.28054	1.86437e-05	0.00225744	ENSG00000182050	2.64638	unchanged
896.861	-0.750021	0.175302	-4.27846	1.8819e-05	0.0022695	ENSG00000116711	2.64407	unchanged
0.470272	18.5494	4.33698	4.27704	1.89392e-05	0.0022695	ENSG00000288976	2.64407	up
0.473826	-18.5338	4.33277	-4.27757	1.88941e-05	0.0022695	ENSG00000253184	2.64407	down
0.461769	18.5108	4.33314	4.27193	1.93792e-05	0.00231425	ENSG00000290484	2.63559	up
0.427812	18.5314	4.34714	4.26289	2.01798e-05	0.0024016	ENSG00000175267	2.6195	up
2376.43	-0.556095	0.130634	-4.25689	2.07288e-05	0.00245853	ENSG00000112667	2.60933	unchanged
3633.02	0.371622	0.0873474	4.25453	2.09492e-05	0.00247621	ENSG00000160131	2.60621	unchanged
2.80693	18.3426	4.31344	4.25244	2.11458e-05	0.00248919	ENSG00000163673	2.60394	up
1.6392	-18.3161	4.30781	-4.25184	2.12022e-05	0.00248919	ENSG00000280214	2.60394	down
740.155	-0.577631	0.136016	-4.24678	2.1686e-05	0.00253741	ENSG00000131459	2.59561	unchanged
1.0722	18.3458	4.3209	4.24584	2.1778e-05	0.00253963	ENSG00000228634	2.59523	up
0.783786	18.3201	4.32102	4.23977	2.23749e-05	0.0026005	ENSG00000271597	2.58494	up
21281.3	-0.445094	0.105025	-4.238	2.25522e-05	0.00261237	ENSG00000163453	2.58297	unchanged
2.3398	18.2455	4.30611	4.23713	2.26394e-05	0.00261376	ENSG00000281162	2.58273	up
315.816	1.66466	0.393092	4.23479	2.28762e-05	0.00263059	ENSG00000203396	2.57995	up
878	-0.583796	0.137895	-4.23362	2.29958e-05	0.00263059	ENSG00000099203	2.57995	unchanged
1.61391	18.2395	4.30842	4.23346	2.30123e-05	0.00263059	ENSG00000272395	2.57995	up
6070.37	-0.358638	0.0848228	-4.22809	2.35687e-05	0.00268537	ENSG00000167964	2.571	unchanged
1.70836	18.2076	4.3073	4.22715	2.36669e-05	0.00268774	ENSG00000203737	2.57061	up
1746.31	-0.520112	0.123195	-4.22184	2.42313e-05	0.00274288	ENSG00000101335	2.56179	unchanged
1.47636	-18.1709	4.30937	-4.2166	2.48018e-05	0.00279834	ENSG00000185105	2.5531	down
6975.47	-0.658728	0.156331	-4.21367	2.51258e-05	0.0028166	ENSG00000134825	2.55027	unchanged
2272.63	-0.585906	0.139037	-4.21403	2.50851e-05	0.0028166	ENSG00000225663	2.55027	unchanged
1.39373	-18.1535	4.3099	-4.21205	2.53061e-05	0.00282769	ENSG00000279164	2.54857	down
1.37757	-18.1524	4.31303	-4.20874	2.56799e-05	0.00286026	ENSG00000207119	2.54359	down
383.091	-0.686318	0.163138	-4.20698	2.58806e-05	0.00287341	ENSG00000285865	2.5416	unchanged
1.46203	-18.1045	4.31074	-4.19986	2.67085e-05	0.00295256	ENSG00000163394	2.5298	down
1.76254	18.0875	4.30717	4.19939	2.67634e-05	0.00295256	ENSG00000288021	2.5298	up
1.54466	-18.0668	4.31042	-4.19142	2.77212e-05	0.00304854	ENSG00000284616	2.51591	down
1.19043	17.9922	4.29678	4.18736	2.82222e-05	0.00309385	ENSG00000243797	2.5095	up
0.586791	18.0795	4.32474	4.18048	2.90895e-05	0.0031789	ENSG00000121377	2.49772	up
1.01306	-18.0761	4.32698	-4.17753	2.94693e-05	0.00321031	ENSG00000181074	2.49345	down
1.15696	-18.0043	4.31318	-4.17426	2.98954e-05	0.00324655	ENSG00000231907	2.48858	down
1.24525	-17.9888	4.31128	-4.17249	3.01284e-05	0.00325074	ENSG00000225569	2.48802	down
1.04126	-18.0066	4.31622	-4.17184	3.02146e-05	0.00325074	ENSG00000229613	2.48802	down
1.33191	17.9859	4.30992	4.17314	3.00428e-05	0.00325074	ENSG00000151838	2.48802	up
254.723	-1.23663	0.296663	-4.16847	3.06648e-05	0.00328899	ENSG00000141434	2.48294	down
1.07063	-17.9742	4.31332	-4.16714	3.08451e-05	0.00329815	ENSG00000187682	2.48173	down
1633.84	-0.530118	0.127255	-4.1658	3.10263e-05	0.00330735	ENSG00000137101	2.48052	unchanged
252.445	0.959211	0.230496	4.16151	3.16149e-05	0.00335979	ENSG00000167280	2.47369	unchanged
0.988571	17.9575	4.31715	4.15957	3.1884e-05	0.00337806	ENSG00000253300	2.47133	up
1.0689	-17.9392	4.31396	-4.1584	3.20482e-05	0.00338513	ENSG00000236511	2.47042	down
6083.88	-0.537675	0.129323	-4.1576	3.21609e-05	0.00338674	ENSG00000221983	2.47022	unchanged
75583.2	-0.571891	0.137602	-4.15613	3.23679e-05	0.00339824	ENSG00000137673	2.46875	unchanged
2112.85	0.436061	0.104957	4.15466	3.25771e-05	0.00339966	ENSG00000174953	2.46856	unchanged
0.686724	17.9901	4.32966	4.15507	3.25181e-05	0.00339966	ENSG00000248150	2.46856	up
4838.55	-0.430774	0.103825	-4.14902	3.33898e-05	0.00347404	ENSG00000109861	2.45917	unchanged
0.854961	-17.9267	4.32247	-4.14733	3.36374e-05	0.00348935	ENSG00000261318	2.45726	down
1.06083	17.8778	4.31281	4.14528	3.39398e-05	0.00351025	ENSG00000224430	2.45466	up
1.4591	17.8407	4.30907	4.14027	3.46897e-05	0.00357716	ENSG00000249436	2.44646	up
1.09145	17.8463	4.31221	4.13855	3.49507e-05	0.00359341	ENSG00000229742	2.44449	up
188685	-0.477878	0.115508	-4.1372	3.51569e-05	0.0035981	ENSG00000171951	2.44393	unchanged
0.478775	17.9851	4.34748	4.1369	3.52034e-05	0.0035981	ENSG00000228739	2.44393	up
1.24385	17.8332	4.3118	4.1359	3.53559e-05	0.00360308	ENSG00000289168	2.44333	up
0.815323	-17.9458	4.34087	-4.13414	3.56284e-05	0.0036062	ENSG00000248300	2.44295	down
1.3279	-17.8576	4.31925	-4.13443	3.55844e-05	0.0036062	ENSG00000270098	2.44295	down
14.9942	3.77663	0.913621	4.13369	3.56978e-05	0.0036062	ENSG00000278989	2.44295	up
1381.74	-0.680418	0.164679	-4.13179	3.59946e-05	0.00362102	ENSG00000171551	2.44117	unchanged
0.823809	17.8423	4.31987	4.1303	3.62296e-05	0.00362102	ENSG00000286338	2.44117	up
2.21732	17.7013	4.28457	4.13141	3.60537e-05	0.00362102	ENSG00000289788	2.44117	up
14290.2	0.358047	0.0866921	4.1301	3.62613e-05	0.00362102	ENSG00000104635	2.44117	unchanged
1.33613	-17.7964	4.31203	-4.12715	3.67292e-05	0.00365724	ENSG00000136535	2.43685	down
1.23646	17.7769	4.31445	4.12033	3.78335e-05	0.00375643	ENSG00000249621	2.42522	up
497.577	-0.953518	0.231554	-4.11791	3.82324e-05	0.00377447	ENSG00000117399	2.42314	unchanged
1.3207	17.8833	4.34265	4.11805	3.82088e-05	0.00377447	ENSG00000279537	2.42314	up
1.21637	17.9723	4.36537	4.11702	3.83798e-05	0.00377829	ENSG00000285908	2.4227	up
14.3528	6.1259	1.48957	4.11253	3.91355e-05	0.0038418	ENSG00000283646	2.41547	up
1.35935	-17.6744	4.30244	-4.10799	3.99123e-05	0.00390702	ENSG00000267640	2.40815	down
0.988073	17.7131	4.31476	4.10522	4.03929e-05	0.00393191	ENSG00000179342	2.4054	up
1.00932	17.7099	4.31353	4.10567	4.0315e-05	0.00393191	ENSG00000285810	2.4054	up
0.907435	17.7505	4.32778	4.10152	4.10439e-05	0.00398413	ENSG00000226501	2.39967	up
1.17832	-17.7332	4.32578	-4.09943	4.14174e-05	0.00400918	ENSG00000279841	2.39694	down
1.03335	17.8526	4.35638	4.09803	4.16682e-05	0.00402226	ENSG00000275401	2.39553	up
1.07235	17.662	4.31357	4.09451	4.23069e-05	0.00405826	ENSG00000286985	2.39166	up
248.89	-0.949541	0.231932	-4.09404	4.23915e-05	0.00405826	ENSG00000198542	2.39166	unchanged
1.53132	17.6537	4.31183	4.09424	4.2355e-05	0.00405826	ENSG00000263120	2.39166	up
5312.63	0.427183	0.104373	4.09286	4.26087e-05	0.00406784	ENSG00000164040	2.39064	unchanged
0.869292	-17.6257	4.31787	-4.08204	4.46425e-05	0.00418543	ENSG00000242551	2.37826	down
0.80297	-17.6288	4.31866	-4.082	4.46501e-05	0.00418543	ENSG00000224895	2.37826	down
19097.1	-0.534659	0.13087	-4.08542	4.39963e-05	0.00418543	ENSG00000164587	2.37826	unchanged
0.989069	17.6294	4.31819	4.08259	4.45368e-05	0.00418543	ENSG00000216360	2.37826	up
1.2156	17.5962	4.31151	4.0812	4.48039e-05	0.00418543	ENSG00000226158	2.37826	up
3297.37	0.406294	0.0995508	4.08127	4.47903e-05	0.00418543	ENSG00000165943	2.37826	unchanged
1.03899	17.66	4.32635	4.08196	4.46567e-05	0.00418543	ENSG00000268717	2.37826	up
0.905443	17.6151	4.31599	4.08137	4.47717e-05	0.00418543	ENSG00000100122	2.37826	up
4798.44	-0.61487	0.150754	-4.07862	4.53029e-05	0.0042207	ENSG00000167772	2.37462	unchanged
3507.02	-0.513229	0.126004	-4.07313	4.6386e-05	0.00431005	ENSG00000050165	2.36552	unchanged
95.3082	-1.56626	0.385042	-4.06776	4.74677e-05	0.0043988	ENSG00000271270	2.35667	down
492.51	-1.14522	0.281859	-4.06311	4.84225e-05	0.00447535	ENSG00000137976	2.34917	down
0.890059	17.5219	4.3146	4.06108	4.8847e-05	0.00450261	ENSG00000226661	2.34654	up
0.939053	17.5267	4.31817	4.05883	4.93187e-05	0.00453406	ENSG00000231892	2.34351	up
7635.71	-0.317688	0.0784007	-4.0521	5.07594e-05	0.00465419	ENSG00000141759	2.33216	unchanged
0.814238	17.4964	4.31878	4.05123	5.09484e-05	0.00465923	ENSG00000221977	2.33169	up
518.109	-0.661518	0.163359	-4.04948	5.13313e-05	0.00468192	ENSG00000137331	2.32958	unchanged
2857.48	0.384002	0.0951173	4.03714	5.41072e-05	0.00486335	ENSG00000163428	2.31306	unchanged
0.762922	17.4373	4.32011	4.0363	5.43e-05	0.00486335	ENSG00000271820	2.31306	up
219.578	-1.23254	0.305233	-4.03803	5.39021e-05	0.00486335	ENSG00000110680	2.31306	down
12222.6	-0.367448	0.0910119	-4.03736	5.40557e-05	0.00486335	ENSG00000182809	2.31306	unchanged
0.762922	17.4373	4.32011	4.0363	5.43e-05	0.00486335	ENSG00000258954	2.31306	up
2.81098	15.9951	3.96041	4.03876	5.37351e-05	0.00486335	ENSG00000171931	2.31306	up
3554.23	0.380531	0.0942335	4.03817	5.3869e-05	0.00486335	ENSG00000105696	2.31306	unchanged
0.809294	17.5186	4.34182	4.03484	5.46391e-05	0.00488114	ENSG00000200872	2.31148	up
0.786662	-17.4188	4.31939	-4.03269	5.5142e-05	0.00489263	ENSG00000217653	2.31046	down
3960.96	0.46225	0.114631	4.03249	5.51901e-05	0.00489263	ENSG00000172889	2.31046	unchanged
0.786662	-17.4188	4.31939	-4.03269	5.5142e-05	0.00489263	ENSG00000286130	2.31046	down
63.7563	-2.53894	0.630739	-4.02535	5.6891e-05	0.00501811	ENSG00000064692	2.29946	down
2619.27	-0.50414	0.125242	-4.02533	5.68943e-05	0.00501811	ENSG00000142552	2.29946	unchanged
0.94218	-17.3643	4.31755	-4.02181	5.77535e-05	0.00508099	ENSG00000249917	2.29405	down
1.71927	17.5071	4.35495	4.02005	5.81868e-05	0.00510408	ENSG00000122121	2.29208	up
4450.84	-0.417029	0.10375	-4.01955	5.83097e-05	0.00510408	ENSG00000167740	2.29208	unchanged
2655.63	0.45359	0.112962	4.01543	5.93376e-05	0.00518101	ENSG00000163623	2.28559	unchanged
1.16137	17.4293	4.34509	4.01126	6.03954e-05	0.00526015	ENSG00000273597	2.279	up
0.775237	17.3105	4.31659	4.01023	6.06602e-05	0.00527001	ENSG00000258823	2.27819	up
1.17083	-17.2136	4.29558	-4.00728	6.14216e-05	0.00532285	ENSG00000226318	2.27386	down
0.659545	17.3269	4.33076	4.00089	6.31041e-05	0.00544871	ENSG00000218631	2.26371	up
486.033	0.604326	0.15106	4.00058	6.31875e-05	0.00544871	ENSG00000107443	2.26371	unchanged
1.08387	17.2561	4.3159	3.99826	6.381e-05	0.00547522	ENSG00000212237	2.2616	up
1.03014	17.2394	4.31149	3.99847	6.37522e-05	0.00547522	ENSG00000255286	2.2616	up
688.526	0.639888	0.160133	3.99597	6.44302e-05	0.00551481	ENSG00000099810	2.25847	unchanged
3974.79	-0.527349	0.132108	-3.9918	6.55742e-05	0.00559894	ENSG00000196950	2.25189	unchanged
2884.01	-0.484048	0.121375	-3.98805	6.66187e-05	0.00567418	ENSG00000177556	2.2461	unchanged
1013.51	0.474885	0.119222	3.98319	6.79971e-05	0.00577743	ENSG00000109118	2.23827	unchanged
23444.3	-0.463714	0.116551	-3.97864	6.93115e-05	0.00586306	ENSG00000117472	2.23188	unchanged
1.37505	17.3419	4.35888	3.97853	6.93424e-05	0.00586306	ENSG00000272995	2.23188	up
0.758557	17.1792	4.31909	3.97751	6.9642e-05	0.0058741	ENSG00000258521	2.23106	up
0.731958	-17.1814	4.32101	-3.97626	7.00072e-05	0.0058906	ENSG00000227683	2.22984	down
600.231	-0.676353	0.170253	-3.97263	7.10832e-05	0.00595514	ENSG00000166997	2.22511	unchanged
14512.6	-0.340052	0.085601	-3.97252	7.11169e-05	0.00595514	ENSG00000105701	2.22511	unchanged
0.78515	-17.1521	4.32156	-3.96895	7.21892e-05	0.00603041	ENSG00000186766	2.21965	down
1005.37	1.03601	0.261253	3.96555	7.32281e-05	0.00610252	ENSG00000154930	2.21449	up
12.3856	-6.99739	1.7661	-3.96206	7.43067e-05	0.00617759	ENSG00000172061	2.20918	down
160.481	1.34818	0.340533	3.95904	7.52512e-05	0.00624118	ENSG00000198945	2.20473	up
111.567	1.43068	0.361484	3.95779	7.56463e-05	0.00625675	ENSG00000144893	2.20365	up
2821.46	-0.379341	0.0958584	-3.95731	7.5799e-05	0.00625675	ENSG00000126768	2.20365	unchanged
1.24842	-17.21	4.35059	-3.95577	7.62871e-05	0.00627833	ENSG00000172482	2.20216	down
0.657995	17.1284	4.33043	3.95535	7.64218e-05	0.00627833	ENSG00000201728	2.20216	up
0.892566	17.1823	4.34594	3.95363	7.69734e-05	0.00630873	ENSG00000259592	2.20006	up
0.812319	17.0695	4.31812	3.95298	7.71839e-05	0.0063111	ENSG00000232455	2.19989	up
1.67474	-16.4983	4.17498	-3.95172	7.75926e-05	0.0063148	ENSG00000239801	2.19964	down
0.730511	17.0755	4.32042	3.95227	7.74137e-05	0.0063148	ENSG00000253965	2.19964	up
949.794	-0.921231	0.233425	-3.94658	7.92756e-05	0.0064367	ENSG00000064300	2.19134	unchanged
2936.17	0.371759	0.0942183	3.94572	7.95598e-05	0.00644471	ENSG00000168824	2.1908	unchanged
0.772204	17.0595	4.3246	3.94476	7.98793e-05	0.00645554	ENSG00000213244	2.19007	up
5294.66	-0.314825	0.079833	-3.94355	8.02841e-05	0.00647321	ENSG00000147123	2.18888	unchanged
337.909	-0.7919	0.201053	-3.93877	8.19013e-05	0.00658831	ENSG00000120327	2.18123	unchanged
917.257	-0.604939	0.153635	-3.93751	8.23331e-05	0.00660775	ENSG00000117594	2.17995	unchanged
0.787833	-17.1581	4.35867	-3.93655	8.26613e-05	0.00661881	ENSG00000277255	2.17922	down
1001.66	0.636122	0.161656	3.93505	8.31806e-05	0.00664508	ENSG00000144712	2.1775	unchanged
1.72347	17.0357	4.33064	3.93375	8.36307e-05	0.00666571	ENSG00000269535	2.17615	up
0.649909	-16.9957	4.32429	-3.9303	8.48411e-05	0.00674671	ENSG00000225413	2.17091	down
0.92326	-17.0476	4.33867	-3.92922	8.52207e-05	0.00676143	ENSG00000173250	2.16996	down
0.807526	-16.9691	4.32395	-3.92445	8.69277e-05	0.00686552	ENSG00000285554	2.16333	down
0.787897	-16.9721	4.32471	-3.92445	8.69279e-05	0.00686552	ENSG00000286068	2.16333	down
254.909	-1.11001	0.282954	-3.92293	8.74768e-05	0.00689321	ENSG00000164326	2.16158	down
2576.75	-0.540985	0.138152	-3.91586	9.00824e-05	0.00708247	ENSG00000186889	2.14981	unchanged
0.742673	16.9816	4.34089	3.91201	9.15299e-05	0.00718003	ENSG00000288737	2.14387	up
0.863981	-17.0477	4.35917	-3.91077	9.20011e-05	0.00719213	ENSG00000245748	2.14314	down
1296.94	0.613299	0.156833	3.91052	9.2098e-05	0.00719213	ENSG00000127561	2.14314	unchanged
16.5458	-5.81012	1.48748	-3.90602	9.38275e-05	0.0073092	ENSG00000102445	2.13613	down
1.12456	-17.0172	4.35721	-3.90553	9.40178e-05	0.0073092	ENSG00000259407	2.13613	down
1.28397	16.8923	4.32583	3.90498	9.42329e-05	0.00730957	ENSG00000164411	2.13611	up
0.806562	16.8659	4.32344	3.90104	9.57805e-05	0.00736387	ENSG00000272203	2.13289	up
0.806562	16.8659	4.32344	3.90104	9.57805e-05	0.00736387	ENSG00000260239	2.13289	up
0.990563	16.9255	4.33854	3.9012	9.57152e-05	0.00736387	ENSG00000177938	2.13289	up
0.5657	-16.911	4.33382	-3.9021	9.53636e-05	0.00736387	ENSG00000259166	2.13289	down
0.830943	16.9739	4.35316	3.89922	9.6505e-05	0.00740319	ENSG00000223730	2.13058	up
0.56786	-16.8556	4.3289	-3.89374	9.87092e-05	0.00752246	ENSG00000289206	2.12364	down
0.56786	-16.8556	4.3289	-3.89374	9.87092e-05	0.00752246	ENSG00000268940	2.12364	down
0.56786	-16.8556	4.3289	-3.89374	9.87092e-05	0.00752246	ENSG00000259474	2.12364	down
0.445518	-16.8814	4.33668	-3.8927	9.91334e-05	0.00753826	ENSG00000227292	2.12273	down
0.961408	-16.9557	4.35721	-3.8914	9.96678e-05	0.0075529	ENSG00000253539	2.12189	down
0.646785	16.8333	4.32602	3.89117	9.97606e-05	0.0075529	ENSG00000236838	2.12189	up
0.510593	16.8436	4.33344	3.8869	0.000101533	0.00767038	ENSG00000224683	2.11518	up
452.085	0.888778	0.228855	3.88359	0.000102926	0.00775876	ENSG00000260912	2.11021	unchanged
0.530414	16.7914	4.32833	3.87941	0.000104708	0.007859	ENSG00000236478	2.10463	up
1138.37	-0.559243	0.144145	-3.87973	0.000104572	0.007859	ENSG00000161281	2.10463	unchanged
193507	-0.425528	0.109724	-3.87816	0.000105248	0.00788249	ENSG00000118785	2.10334	unchanged
5702.47	-0.456244	0.117773	-3.87392	0.0001071	0.00800394	ENSG00000122884	2.0967	unchanged
0.487972	-16.7811	4.33268	-3.87315	0.000107437	0.00801189	ENSG00000270930	2.09627	down
0.468343	-16.7815	4.33393	-3.87211	0.000107899	0.00802912	ENSG00000264932	2.09533	down
0.550979	-16.7472	4.33476	-3.86347	0.00011179	0.00830088	ENSG00000261126	2.08088	down
1514.66	0.426922	0.110728	3.85559	0.00011545	0.00855438	ENSG00000101193	2.06781	unchanged
1065.89	-0.563423	0.146207	-3.8536	0.000116392	0.0086058	ENSG00000015532	2.06521	unchanged
4488.75	-0.590227	0.153252	-3.85136	0.000117464	0.00866663	ENSG00000183011	2.06215	unchanged
0.956268	-16.7776	4.35807	-3.84979	0.000118218	0.00870383	ENSG00000255115	2.06029	down
2849.67	-0.507403	0.13187	-3.84775	0.00011921	0.00875827	ENSG00000110871	2.05758	unchanged
649.936	-0.671854	0.174756	-3.84452	0.000120788	0.00884956	ENSG00000180596	2.05308	unchanged
2862.38	-0.344867	0.0897117	-3.84417	0.000120962	0.00884956	ENSG00000277972	2.05308	unchanged
0.710756	-16.6212	4.33185	-3.83698	0.000124558	0.00909352	ENSG00000289912	2.04127	down
3636.24	-0.406623	0.106245	-3.82722	0.000129598	0.0094018	ENSG00000172428	2.02679	unchanged
0.486778	16.6467	4.35071	3.82621	0.000130133	0.0094018	ENSG00000255109	2.02679	up
1521.36	-0.633651	0.16557	-3.82708	0.000129673	0.0094018	ENSG00000166171	2.02679	unchanged
0.486778	16.6467	4.35071	3.82621	0.000130133	0.0094018	ENSG00000259051	2.02679	up
4159.78	-0.565534	0.147773	-3.82705	0.000129691	0.0094018	ENSG00000169710	2.02679	unchanged
18277.8	-0.377976	0.0988205	-3.82488	0.000130838	0.00941353	ENSG00000197043	2.02625	unchanged
1.7895	-16.666	4.35717	-3.82495	0.000130798	0.00941353	ENSG00000272908	2.02625	down
96.1803	-1.55876	0.407892	-3.82151	0.000132639	0.00952344	ENSG00000175471	2.02121	down
0.473837	-16.6101	4.34818	-3.82001	0.000133444	0.0095615	ENSG00000262663	2.01947	down
3321.57	-0.462201	0.121035	-3.81873	0.000134141	0.00959161	ENSG00000146282	2.01811	unchanged
3797.9	-0.397956	0.104421	-3.81106	0.000138375	0.00985383	ENSG00000180992	2.0064	unchanged
22005.5	-0.400712	0.105143	-3.81111	0.000138344	0.00985383	ENSG00000126432	2.0064	unchanged
131.38	-1.83737	0.482248	-3.81001	0.00013896	0.00985508	ENSG00000006128	2.00634	down
2879.8	-0.459522	0.120604	-3.81018	0.000138863	0.00985508	ENSG00000122490	2.00634	unchanged
1.92893	-16.5979	4.35729	-3.80922	0.000139406	0.00986663	ENSG00000107447	2.00583	down
19.3474	-6.14506	1.6137	-3.80806	0.000140063	0.00989293	ENSG00000148948	2.00468	down
661.822	-0.979208	0.257249	-3.80645	0.000140974	0.00993706	ENSG00000171557	2.00274	unchanged
1.04239	16.5007	4.33846	3.80337	0.000142744	0.0100415	ENSG00000164822	1.9982	up
0.882612	16.4552	4.33973	3.79175	0.000149587	0.0105016	ENSG00000184571	1.97874	up
54881.1	-0.416835	0.109952	-3.79106	0.000150004	0.0105097	ENSG00000074800	1.97841	unchanged
94761	-0.479058	0.126479	-3.78765	0.000152078	0.0106335	ENSG00000156508	1.97332	unchanged
3068.84	-0.426645	0.112792	-3.78256	0.000155221	0.0108315	ENSG00000108039	1.96531	unchanged
0.553726	-16.423	4.34609	-3.77879	0.000157589	0.0109747	ENSG00000183695	1.95961	down
8662.17	-0.381743	0.101101	-3.77585	0.000159465	0.0110831	ENSG00000136830	1.95534	unchanged
2805.48	-0.398967	0.10573	-3.77346	0.000160999	0.0111674	ENSG00000110711	1.95205	unchanged
2674.37	0.501452	0.133097	3.76757	0.000164843	0.0114112	ENSG00000198815	1.94267	unchanged
1063.59	0.640589	0.170056	3.76693	0.000165268	0.011418	ENSG00000174197	1.94241	unchanged
1.43656	16.4108	4.35936	3.76449	0.000166889	0.0115071	ENSG00000273381	1.93903	up
18836.4	-0.462314	0.122861	-3.76291	0.000167949	0.0115572	ENSG00000184432	1.93715	unchanged
311.317	-1.00022	0.266054	-3.75945	0.000170289	0.0116951	ENSG00000149571	1.932	down
10430.1	-0.315611	0.0840419	-3.7554	0.000173064	0.0118622	ENSG00000142534	1.92583	unchanged
772.306	-0.640462	0.170598	-3.75421	0.000173887	0.0118952	ENSG00000172602	1.92463	unchanged
2373.18	-0.404322	0.107807	-3.75043	0.000176528	0.0120521	ENSG00000177469	1.91894	unchanged
5342.82	-0.347037	0.092563	-3.7492	0.000177401	0.012088	ENSG00000110811	1.91765	unchanged
4440	-0.440391	0.117561	-3.74607	0.000179629	0.012192	ENSG00000138175	1.91393	unchanged
3437.66	-0.634218	0.169282	-3.74653	0.000179299	0.012192	ENSG00000099994	1.91393	unchanged
0.425377	-16.3943	4.3771	-3.74547	0.000180057	0.0121972	ENSG00000230831	1.91374	down
1700.37	-0.507016	0.135615	-3.73864	0.000185017	0.0125088	ENSG00000126458	1.90278	unchanged
0.845272	-16.2936	4.36282	-3.73465	0.000187976	0.0126842	ENSG00000259103	1.89674	down
0.467809	16.235	4.34783	3.73404	0.000188431	0.0126902	ENSG00000228677	1.89653	up
0.564748	16.2868	4.36909	3.72773	0.000193211	0.012987	ENSG00000287159	1.88649	up
1.39869	-16.2419	4.36466	-3.72122	0.000198261	0.0132606	ENSG00000230104	1.87744	down
1.61133	16.2046	4.35485	3.72105	0.000198397	0.0132606	ENSG00000261449	1.87744	up
0.405453	-16.3085	4.38281	-3.72101	0.000198427	0.0132606	ENSG00000202081	1.87744	down
0.494884	-16.2677	4.37305	-3.71999	0.000199234	0.013289	ENSG00000253497	1.87651	down
716.771	0.577201	0.155206	3.71894	0.000200061	0.0133186	ENSG00000204524	1.87554	unchanged
11473.3	-0.36351	0.0977618	-3.71832	0.000200551	0.0133257	ENSG00000111481	1.87531	unchanged
0.422335	-16.2846	4.38156	-3.71663	0.000201901	0.0133898	ENSG00000248399	1.87323	down
0.493732	16.252	4.37398	3.71561	0.000202717	0.0133933	ENSG00000242696	1.87311	up
0.903567	16.2031	4.36083	3.7156	0.000202725	0.0133933	ENSG00000290421	1.87311	up
7798.16	0.57025	0.153536	3.71412	0.00020391	0.013446	ENSG00000168243	1.87141	unchanged
1908.01	0.492294	0.132575	3.71333	0.000204553	0.0134629	ENSG00000167191	1.87086	unchanged
236.85	-1.16186	0.313676	-3.704	0.000212225	0.0139415	ENSG00000158578	1.85569	down
1512.67	0.604617	0.163397	3.70029	0.000215352	0.0141202	ENSG00000181045	1.85016	unchanged
1.17783	16.1419	4.36784	3.69562	0.00021935	0.0143553	ENSG00000264116	1.84299	up
29031.5	-0.550177	0.148936	-3.69406	0.000220704	0.0144167	ENSG00000124172	1.84113	unchanged
10955.7	0.669319	0.181247	3.69285	0.000221756	0.0144582	ENSG00000157601	1.83989	unchanged
0.697642	16.0929	4.36321	3.68832	0.000225742	0.0146906	ENSG00000264408	1.83296	up
0.719005	-16.1	4.36634	-3.68731	0.000226637	0.0147212	ENSG00000243103	1.83206	down
1270.59	0.576846	0.156651	3.68237	0.000231075	0.0149815	ENSG00000187122	1.82444	unchanged
24.0329	-5.23742	1.42394	-3.67812	0.000234957	0.0152049	ENSG00000142583	1.81802	down
11742.9	-0.408118	0.111089	-3.6738	0.000238966	0.0154069	ENSG00000177697	1.81229	unchanged
832.108	-0.687005	0.186991	-3.67399	0.000238793	0.0154069	ENSG00000188321	1.81229	unchanged
4915.44	-0.395085	0.107632	-3.67069	0.000241893	0.0155667	ENSG00000099795	1.8078	unchanged
0.40666	16.037	4.37741	3.66358	0.000248715	0.0159761	ENSG00000225739	1.79653	up
1237.86	-0.454031	0.123949	-3.66306	0.00024922	0.015979	ENSG00000179029	1.79645	unchanged
8241.92	-0.379816	0.103737	-3.66133	0.000250907	0.0160576	ENSG00000163479	1.79432	unchanged
63.0641	-2.12216	0.579712	-3.66071	0.000251514	0.0160668	ENSG00000118997	1.79407	down
273.308	-1.2096	0.330568	-3.65915	0.000253053	0.0161355	ENSG00000134042	1.79222	down
0.953847	-16.0144	4.37768	-3.6582	0.000253993	0.0161658	ENSG00000115705	1.7914	down
25443.1	-0.387065	0.105991	-3.65185	0.00026036	0.0165407	ENSG00000198959	1.78145	unchanged
8990.16	0.509658	0.139788	3.64594	0.000266413	0.0168944	ENSG00000149131	1.77226	unchanged
3025.96	0.389556	0.106865	3.6453	0.000267082	0.0169059	ENSG00000138613	1.77196	unchanged
1289.93	-0.540957	0.148421	-3.64474	0.000267659	0.0169117	ENSG00000156482	1.77181	unchanged
1240.41	0.589462	0.161909	3.64071	0.000271892	0.0171479	ENSG00000136381	1.76579	unchanged
3158.2	-0.584762	0.160741	-3.63791	0.000274863	0.0173039	ENSG00000100314	1.76186	unchanged
769.682	0.637072	0.175204	3.63616	0.00027673	0.0173643	ENSG00000176542	1.76034	unchanged
14.8007	-6.09862	1.67747	-3.63561	0.000277322	0.0173643	ENSG00000233191	1.76034	down
1.27776	15.9164	4.37741	3.63602	0.000276882	0.0173643	ENSG00000279678	1.76034	up
16.8631	-5.87946	1.61965	-3.63009	0.000283325	0.0177084	ENSG00000168955	1.75182	down
2.33815	15.3843	4.24196	3.62669	0.000287076	0.0178934	ENSG00000286482	1.74731	up
0.803227	-15.9226	4.39064	-3.62648	0.000287316	0.0178934	ENSG00000240991	1.74731	down
3665.76	-0.369272	0.102067	-3.61792	0.000296978	0.0184621	ENSG00000146540	1.73372	unchanged
6130.84	-0.380918	0.105339	-3.61612	0.000299056	0.018558	ENSG00000163041	1.73147	unchanged
15640	-0.515897	0.142828	-3.61203	0.000303815	0.0188197	ENSG00000138085	1.72539	unchanged
3746.95	-0.342721	0.094939	-3.60991	0.000306305	0.0189402	ENSG00000130037	1.72261	unchanged
0.5192	-15.8673	4.39638	-3.60917	0.000307174	0.0189602	ENSG00000201346	1.72216	down
261.691	1.81155	0.503869	3.59527	0.000324051	0.0199665	ENSG00000134569	1.6997	up
528.945	-0.721996	0.200981	-3.59236	0.000327701	0.0201556	ENSG00000243709	1.6956	unchanged
147.979	1.06162	0.295649	3.5908	0.000329664	0.0202406	ENSG00000259877	1.69378	up
2839.77	0.384651	0.107212	3.58775	0.000333548	0.0204429	ENSG00000166265	1.68946	unchanged
1004.46	-0.737737	0.205656	-3.58723	0.000334209	0.0204474	ENSG00000185973	1.68936	unchanged
18.8482	3.12616	0.871694	3.5863	0.000335398	0.0204841	ENSG00000267541	1.68858	up
0.396664	-15.6992	4.38375	-3.58124	0.000341973	0.0208489	ENSG00000269970	1.68092	down
4045.64	-0.454197	0.127153	-3.57206	0.000354186	0.0215557	ENSG00000134697	1.66644	unchanged
0.641792	-15.6947	4.39461	-3.57135	0.000355153	0.0215768	ENSG00000261816	1.66601	down
781.438	0.576454	0.161481	3.5698	0.00035725	0.0216663	ENSG00000165246	1.66422	unchanged
674.007	0.675691	0.189319	3.56907	0.000358254	0.0216894	ENSG00000174652	1.66375	unchanged
0.721921	-15.6047	4.37278	-3.5686	0.000358893	0.0216903	ENSG00000231252	1.66374	down
1573.07	-0.561665	0.157505	-3.56601	0.000362464	0.021868	ENSG00000105974	1.66019	unchanged
3944.83	-0.466743	0.130954	-3.56417	0.000365011	0.0219835	ENSG00000139168	1.6579	unchanged
4889.75	-0.449735	0.12621	-3.56338	0.000366104	0.0220112	ENSG00000177600	1.65736	unchanged
12.7763	6.3861	1.79245	3.56277	0.000366967	0.022025	ENSG00000122733	1.65708	up
9169.98	-0.517448	0.145364	-3.55967	0.000371324	0.0222481	ENSG00000229117	1.65271	unchanged
2839.48	0.320534	0.0900657	3.55889	0.000372429	0.0222499	ENSG00000116977	1.65267	unchanged
14729.6	-0.308883	0.0867957	-3.55874	0.000372636	0.0222499	ENSG00000120742	1.65267	unchanged
2407.44	0.440874	0.124158	3.5509	0.000383911	0.0228447	ENSG00000163235	1.64121	unchanged
0.87401	15.5259	4.3723	3.55098	0.000383805	0.0228447	ENSG00000173626	1.64121	up
73.8573	-1.74557	0.491985	-3.54802	0.000388138	0.0230567	ENSG00000184160	1.6372	down
4328	0.419539	0.118298	3.54646	0.00039045	0.0230758	ENSG00000174516	1.63684	unchanged
1625.81	-0.42544	0.119942	-3.54704	0.000389583	0.0230758	ENSG00000134285	1.63684	unchanged
3138.5	0.351992	0.0992462	3.54665	0.000390163	0.0230758	ENSG00000139687	1.63684	unchanged
3416.17	0.533202	0.15039	3.54547	0.000391918	0.0231232	ENSG00000148730	1.63595	unchanged
0.402126	-15.6214	4.40746	-3.54431	0.000393643	0.0231856	ENSG00000265033	1.63478	down
1324.45	0.631163	0.178221	3.54147	0.000397904	0.0233969	ENSG00000164284	1.63084	unchanged
34.234	4.4713	1.26369	3.53828	0.000402741	0.0236413	ENSG00000178429	1.62633	up
7138.49	-0.346694	0.0981502	-3.53229	0.000411985	0.0241431	ENSG00000172893	1.61721	unchanged
0.829561	-15.4401	4.37246	-3.53122	0.000413651	0.0242	ENSG00000239731	1.61619	down
8190.7	-0.403276	0.114222	-3.53063	0.000414575	0.0242133	ENSG00000141429	1.61595	unchanged
1888.45	0.447372	0.126844	3.52695	0.00042037	0.0245105	ENSG00000165959	1.61065	unchanged
1314.85	-0.71867	0.203838	-3.5257	0.000422366	0.0245857	ENSG00000196611	1.60932	unchanged
24.0557	2.52152	0.715489	3.52419	0.000424772	0.0246431	ENSG00000253106	1.6083	up
0.745569	-15.4134	4.37314	-3.52457	0.000424175	0.0246431	ENSG00000264254	1.6083	down
1.07194	-15.3859	4.37181	-3.51935	0.000432602	0.0250556	ENSG00000146809	1.6011	down
1892.49	-0.402998	0.114704	-3.51338	0.000442439	0.0255827	ENSG00000204950	1.59205	unchanged
6070.8	-0.394562	0.112396	-3.51046	0.000447337	0.025823	ENSG00000115758	1.58799	unchanged
8521.4	-0.424455	0.120946	-3.50946	0.000449018	0.025877	ENSG00000083845	1.58709	unchanged
15277.7	0.435359	0.124087	3.50849	0.000450654	0.0259283	ENSG00000160710	1.58623	unchanged
441.344	0.694542	0.19804	3.50707	0.000453064	0.0260238	ENSG00000147862	1.58463	unchanged
3324.38	0.583529	0.166491	3.50486	0.000456845	0.0261977	ENSG00000055332	1.58174	unchanged
2284.21	0.49476	0.141194	3.50412	0.000458117	0.0262274	ENSG00000130741	1.58125	unchanged
1117.29	0.527004	0.15046	3.50262	0.000460715	0.0263327	ENSG00000125633	1.5795	unchanged
0.644507	-15.3923	4.39565	-3.50172	0.000462264	0.0263779	ENSG00000250260	1.57876	down
22023.3	-0.403268	0.115209	-3.50031	0.000464718	0.0264311	ENSG00000213719	1.57788	unchanged
5606.74	-0.515748	0.147342	-3.50034	0.000464657	0.0264311	ENSG00000213741	1.57788	unchanged
3215.34	0.457619	0.130895	3.49607	0.000472158	0.0267667	ENSG00000153561	1.57241	unchanged
3964.13	0.330018	0.0943917	3.49626	0.000471837	0.0267667	ENSG00000198478	1.57241	unchanged
0.879023	-15.3405	4.38875	-3.49542	0.000473314	0.0267885	ENSG00000181856	1.57205	down
86908.8	-0.579179	0.165819	-3.49284	0.000477919	0.0270051	ENSG00000124107	1.56855	unchanged
17887.9	-0.376535	0.107822	-3.4922	0.000479064	0.0270259	ENSG00000100804	1.56822	unchanged
62.4969	2.88396	0.827027	3.48714	0.000488224	0.027498	ENSG00000230204	1.5607	up
808.797	0.667232	0.191438	3.48536	0.000491467	0.0276359	ENSG00000118322	1.55853	unchanged
1487.29	0.334458	0.0961061	3.48009	0.000501249	0.0281404	ENSG00000153989	1.55067	unchanged
3651.82	0.390174	0.112158	3.4788	0.000503668	0.0281851	ENSG00000184678	1.54998	unchanged
37.6396	-2.23687	0.642935	-3.47914	0.000503016	0.0281851	ENSG00000178776	1.54998	down
1837.83	-0.427426	0.122964	-3.47603	0.000508905	0.0284324	ENSG00000170310	1.54619	unchanged
735.046	-0.567129	0.163255	-3.47388	0.000512987	0.0286144	ENSG00000131732	1.54341	unchanged
1907.34	-0.801432	0.230766	-3.47292	0.000514832	0.0286305	ENSG00000171564	1.54317	unchanged
3364.78	0.507643	0.146184	3.47262	0.0005154	0.0286305	ENSG00000132356	1.54317	unchanged
2040.17	0.564253	0.162495	3.47244	0.000515745	0.0286305	ENSG00000057704	1.54317	unchanged
777.59	0.67985	0.19596	3.46933	0.000521758	0.028918	ENSG00000063601	1.53883	unchanged
1072.8	0.706229	0.20359	3.46888	0.000522629	0.0289202	ENSG00000147255	1.5388	unchanged
7.50052	-5.79393	1.671	-3.46734	0.000525645	0.0290408	ENSG00000287951	1.53699	down
7182.18	0.354454	0.102383	3.46205	0.000536071	0.0295699	ENSG00000189060	1.52915	unchanged
261.029	-1.28411	0.371355	-3.45789	0.000544419	0.0299827	ENSG00000181773	1.52313	down
1.35788	-15.0214	4.34693	-3.45563	0.000549012	0.0301878	ENSG00000225726	1.52017	down
233.707	-1.03454	0.299541	-3.45374	0.000552875	0.0303522	ENSG00000105509	1.51781	down
915.167	-0.602054	0.174376	-3.45262	0.00055518	0.0304307	ENSG00000271824	1.51669	unchanged
760.161	-0.529859	0.153505	-3.45174	0.00055699	0.0304818	ENSG00000165948	1.51596	unchanged
14261.1	-0.445505	0.129105	-3.45071	0.00055911	0.0305038	ENSG00000168653	1.51565	unchanged
3680.53	-0.51406	0.148973	-3.45069	0.000559148	0.0305038	ENSG00000171858	1.51565	unchanged
6607.96	-0.420582	0.121931	-3.44933	0.000561971	0.03053	ENSG00000114942	1.51527	unchanged
9199.44	-0.472327	0.136938	-3.44919	0.000562263	0.03053	ENSG00000090266	1.51527	unchanged
1387.05	-0.49242	0.142745	-3.44964	0.000561334	0.03053	ENSG00000183010	1.51527	unchanged
333.663	-1.15311	0.334369	-3.44862	0.000563462	0.0305474	ENSG00000128591	1.51503	down
42273.4	-0.381765	0.110846	-3.44412	0.000572929	0.0310123	ENSG00000196262	1.50847	unchanged
10067.8	-0.556198	0.161581	-3.44223	0.000576944	0.031181	ENSG00000164825	1.50611	unchanged
1315.22	0.505275	0.146866	3.44037	0.000580916	0.0313469	ENSG00000172575	1.50381	unchanged
1328.83	0.442729	0.128773	3.43806	0.000585893	0.0315665	ENSG00000156273	1.50077	unchanged
12055	-0.523368	0.152327	-3.43581	0.000590781	0.0317805	ENSG00000125743	1.49784	unchanged
210.758	-1.03673	0.301818	-3.43494	0.00059268	0.0318334	ENSG00000123892	1.49712	down
4561.32	-0.445935	0.12987	-3.43369	0.000595414	0.0319309	ENSG00000149806	1.49579	unchanged
2314.73	-0.52563	0.153113	-3.43295	0.00059705	0.0319693	ENSG00000167272	1.49527	unchanged
1148	0.531557	0.154875	3.43217	0.000598781	0.0320127	ENSG00000165821	1.49468	unchanged
627.801	-0.727669	0.212056	-3.4315	0.000600257	0.0320423	ENSG00000204711	1.49428	unchanged
6277.02	-0.368326	0.107403	-3.42939	0.000604929	0.0322421	ENSG00000197859	1.49158	unchanged
11.8925	3.45108	1.0067	3.42811	0.000607796	0.0322959	ENSG00000163884	1.49085	up
333.057	0.783339	0.228489	3.42834	0.000607275	0.0322959	ENSG00000139200	1.49085	unchanged
8314.8	-0.406153	0.118685	-3.42212	0.000621356	0.0329401	ENSG00000165775	1.48228	unchanged
7057.78	0.336597	0.0983652	3.42192	0.000621815	0.0329401	ENSG00000111674	1.48228	unchanged
3729.88	-0.364238	0.106502	-3.42	0.000626206	0.0331222	ENSG00000186716	1.47988	unchanged
3053.84	0.40398	0.118186	3.41817	0.000630428	0.0332948	ENSG00000116698	1.47762	unchanged
2106.19	-0.421031	0.123273	-3.41542	0.000636832	0.033582	ENSG00000175906	1.47389	unchanged
1.04425	-14.9896	4.39041	-3.41418	0.000639753	0.0336183	ENSG00000287092	1.47342	down
18495.5	-0.371205	0.108718	-3.41439	0.000639239	0.0336183	ENSG00000123131	1.47342	unchanged
595.406	-0.625263	0.183152	-3.41389	0.000640423	0.0336183	ENSG00000186665	1.47342	unchanged
112.271	1.18109	0.346239	3.4112	0.000646784	0.033901	ENSG00000164619	1.46979	up
1906.23	-0.593127	0.173941	-3.40994	0.000649778	0.0340067	ENSG00000118849	1.46844	unchanged
890.604	-0.572138	0.167861	-3.40839	0.000653465	0.0341482	ENSG00000164687	1.46663	unchanged
15.2044	3.65356	1.07237	3.40698	0.000656849	0.0342735	ENSG00000258730	1.46504	up
0.863286	-15.0052	4.40746	-3.4045	0.000662853	0.034535	ENSG00000253064	1.46174	down
5965.81	-0.506993	0.148987	-3.40292	0.000666692	0.0346829	ENSG00000173660	1.45988	unchanged
2585.17	-0.459169	0.13515	-3.39746	0.000680138	0.0353295	ENSG00000127540	1.45186	unchanged
3764.58	-0.4078	0.120082	-3.39601	0.000683749	0.0354641	ENSG00000028203	1.45021	unchanged
1616.34	0.471506	0.138897	3.39463	0.000687202	0.0355901	ENSG00000182836	1.44867	unchanged
1955.32	0.369581	0.109122	3.38686	0.000706968	0.0365593	ENSG00000149532	1.437	unchanged
1205.01	0.47934	0.141704	3.3827	0.000717782	0.0370634	ENSG00000198646	1.43106	unchanged
12.4052	-4.62503	1.36759	-3.38189	0.000719899	0.0371175	ENSG00000231672	1.43042	down
12041	-0.32564	0.0963751	-3.37889	0.000727804	0.0374695	ENSG00000137818	1.42632	unchanged
65.0368	1.47694	0.437218	3.37804	0.000730041	0.0375291	ENSG00000255690	1.42563	up
772.029	-0.449146	0.133251	-3.37067	0.000749849	0.0384904	ENSG00000104731	1.41465	unchanged
2382.5	-0.459912	0.13665	-3.36562	0.000763717	0.0391444	ENSG00000163832	1.40733	unchanged
172.821	1.32945	0.395097	3.36488	0.00076576	0.0391913	ENSG00000165731	1.40681	up
0.90225	-14.7728	4.39262	-3.36309	0.000770766	0.0393895	ENSG00000223838	1.40462	down
1785.41	0.588778	0.175136	3.36184	0.00077424	0.0394706	ENSG00000108924	1.40373	unchanged
276.917	0.904492	0.269057	3.36171	0.000774623	0.0394706	ENSG00000197608	1.40373	unchanged
2936.14	0.473184	0.141037	3.35504	0.000793536	0.0403026	ENSG00000113742	1.39467	unchanged
6213.6	-0.420977	0.12548	-3.35494	0.00079381	0.0403026	ENSG00000145592	1.39467	unchanged
444.445	0.840884	0.250656	3.35473	0.000794431	0.0403026	ENSG00000112144	1.39467	unchanged
2252.34	0.562616	0.167853	3.35184	0.000802763	0.0406659	ENSG00000173821	1.39077	unchanged
1545.21	0.333049	0.0994323	3.34951	0.000809549	0.0408905	ENSG00000108179	1.38838	unchanged
4334.69	-0.474802	0.141742	-3.34975	0.000808841	0.0408905	ENSG00000133104	1.38838	unchanged
10.16	6.74103	2.01383	3.34737	0.000815816	0.0411472	ENSG00000138395	1.38566	up
1696.26	-0.340457	0.101732	-3.34659	0.000818109	0.0412031	ENSG00000067221	1.38507	unchanged
6225.96	-0.488178	0.145898	-3.34601	0.00081982	0.0412295	ENSG00000142676	1.38479	unchanged
320.83	-0.770255	0.230502	-3.34165	0.000832826	0.041823	ENSG00000230838	1.37858	unchanged
1707.48	-0.485308	0.145372	-3.33838	0.000842671	0.0422564	ENSG00000239672	1.37411	unchanged
6146.36	0.413407	0.12387	3.33744	0.000845539	0.0423391	ENSG00000069702	1.37326	unchanged
3346.99	-0.270613	0.0811195	-3.33598	0.000850007	0.0425016	ENSG00000049449	1.3716	unchanged
48277.3	-0.498356	0.149481	-3.3339	0.000856363	0.0427579	ENSG00000150991	1.36898	unchanged
877.162	-0.492636	0.147794	-3.33326	0.000858362	0.0427962	ENSG00000131153	1.36859	unchanged
2759.11	-0.28626	0.0859038	-3.33234	0.000861204	0.0428764	ENSG00000167645	1.36778	unchanged
6644.24	-0.388503	0.116754	-3.32752	0.000876228	0.0435619	ENSG00000142892	1.36089	unchanged
363.401	0.670321	0.201557	3.32571	0.000881925	0.0437825	ENSG00000114790	1.3587	unchanged
69.0458	2.03187	0.61174	3.32145	0.000895495	0.0443928	ENSG00000232229	1.35269	up
4248.34	-0.364903	0.109939	-3.31914	0.000902966	0.0446994	ENSG00000231013	1.3497	unchanged
17920.7	-0.492576	0.148452	-3.31808	0.000906396	0.0448054	ENSG00000129562	1.34867	unchanged
193.722	-0.844535	0.254582	-3.31734	0.000908785	0.0448597	ENSG00000217442	1.34814	unchanged
460.99	-0.897585	0.27073	-3.31542	0.000915055	0.0451051	ENSG00000163520	1.34577	unchanged
3906.01	0.348444	0.105134	3.31428	0.000918806	0.0452258	ENSG00000174080	1.34461	unchanged
1025.91	-0.453064	0.136772	-3.31256	0.000924467	0.0454401	ENSG00000149972	1.34256	unchanged
53.4516	3.2178	0.972152	3.30997	0.000933045	0.0457969	ENSG00000124467	1.33916	up
9939.66	-0.460145	0.139064	-3.30887	0.000936746	0.0458491	ENSG00000156411	1.33867	unchanged
13424.7	-0.352559	0.106549	-3.30891	0.000936614	0.0458491	ENSG00000140297	1.33867	unchanged
54065.2	-0.4544	0.137406	-3.307	0.000943013	0.0460909	ENSG00000092841	1.33638	unchanged
1454.67	0.470502	0.142323	3.30588	0.000946791	0.0462106	ENSG00000164190	1.33526	unchanged
25079.2	-0.317452	0.0961288	-3.30236	0.000958741	0.0467282	ENSG00000123989	1.33042	unchanged
137.516	-0.91463	0.276996	-3.30196	0.000960122	0.04673	ENSG00000285873	1.3304	unchanged
4483.86	0.358005	0.108508	3.29934	0.000969133	0.0471026	ENSG00000072832	1.32696	unchanged
0.575885	-14.4916	4.39423	-3.29786	0.00097423	0.0472842	ENSG00000258850	1.32528	down
12.5688	-4.79895	1.45575	-3.29655	0.000978794	0.0473723	ENSG00000203446	1.32448	down
1867.73	-0.532655	0.161598	-3.29617	0.000980135	0.0473723	ENSG00000122641	1.32448	unchanged
1812.47	0.620459	0.188218	3.2965	0.000978979	0.0473723	ENSG00000106780	1.32448	unchanged
14095	-0.312857	0.0949299	-3.29567	0.000981879	0.0473907	ENSG00000167642	1.32431	unchanged
2157.82	0.501706	0.152298	3.29424	0.000986884	0.0475662	ENSG00000172493	1.3227	unchanged
19.4058	-2.73568	0.830648	-3.29343	0.000989732	0.0476374	ENSG00000255507	1.32205	down
30.888	3.11537	0.947026	3.28964	0.00100316	0.0482167	ENSG00000158296	1.3168	up
2185.58	-0.503151	0.15304	-3.2877	0.0010101	0.0484833	ENSG00000165195	1.31441	unchanged
13145.1	-0.297395	0.0905241	-3.28526	0.00101889	0.0488381	ENSG00000089157	1.31124	unchanged
8.85986	6.10865	1.85968	3.28478	0.00102061	0.0488531	ENSG00000185985	1.31111	up
15120.8	-0.462433	0.140956	-3.28069	0.00103552	0.0494983	ENSG00000135047	1.30541	unchanged
1159.71	-0.518801	0.158253	-3.27831	0.00104432	0.0498504	ENSG00000173207	1.30233	unchanged
1888.87	0.434129	0.132787	3.26935	0.00107793	0.0513139	ENSG00000164715	1.28977	unchanged
7013.24	-0.2707	0.082797	-3.26944	0.00107762	0.0513139	ENSG00000149932	1.28977	unchanged
3400.59	-0.444115	0.135991	-3.26577	0.00109168	0.0518974	ENSG00000163444	1.28485	unchanged
4051.54	-0.372602	0.114128	-3.26478	0.00109547	0.0519356	ENSG00000188976	1.28454	unchanged
1893.72	-0.462223	0.141567	-3.26504	0.00109448	0.0519356	ENSG00000121361	1.28454	unchanged
2617.7	-0.441145	0.135171	-3.26359	0.00110009	0.0520186	ENSG00000160360	1.28384	unchanged
434.995	0.679635	0.208249	3.26356	0.00110022	0.0520186	ENSG00000119547	1.28384	unchanged
13.3089	-3.31541	1.01612	-3.26282	0.00110309	0.0520449	ENSG00000285906	1.28362	unchanged
2449.3	-0.311774	0.0955585	-3.26265	0.00110377	0.0520449	ENSG00000204308	1.28362	unchanged
544.01	-0.568198	0.174201	-3.26175	0.00110728	0.0521398	ENSG00000111341	1.28283	unchanged
9700.13	-0.374735	0.115019	-3.25802	0.00112193	0.052758	ENSG00000117448	1.27771	unchanged
4824.84	0.583193	0.17911	3.25606	0.00112968	0.0530293	ENSG00000143376	1.27548	unchanged
14599	-0.310884	0.0954864	-3.2558	0.00113075	0.0530293	ENSG00000142156	1.27548	unchanged
113.621	2.0318	0.624323	3.25441	0.0011363	0.0532175	ENSG00000157890	1.27395	unchanged
1.15278	-14.2816	4.39155	-3.25205	0.00114574	0.0535877	ENSG00000127472	1.27093	unchanged
25609	-0.339922	0.104548	-3.25133	0.00114866	0.053652	ENSG00000106366	1.27041	unchanged
3742.6	-0.428572	0.13197	-3.24749	0.0011643	0.054209	ENSG00000118246	1.26593	unchanged
13057.3	-0.424863	0.130828	-3.24749	0.00116427	0.054209	ENSG00000011465	1.26593	unchanged
874.889	-0.53928	0.166073	-3.24725	0.00116527	0.054209	ENSG00000092020	1.26593	unchanged
6720.56	-0.457213	0.140928	-3.24431	0.00117734	0.0546974	ENSG00000100097	1.26203	unchanged
34.6928	2.58707	0.797517	3.24391	0.00117902	0.0547025	ENSG00000131042	1.26199	unchanged
955.292	0.664644	0.204919	3.24345	0.00118091	0.0547171	ENSG00000087085	1.26188	unchanged
125.399	1.10876	0.34208	3.24124	0.0011901	0.0550255	ENSG00000100433	1.25944	unchanged
1.73537	-14.2215	4.38787	-3.24109	0.00119073	0.0550255	ENSG00000237387	1.25944	unchanged
15990.3	-0.444111	0.137056	-3.24037	0.00119373	0.0550908	ENSG00000164405	1.25892	unchanged
63.849	2.04443	0.631786	3.23595	0.00121237	0.0558027	ENSG00000027644	1.25335	unchanged
2999.44	0.391123	0.120855	3.23631	0.00121086	0.0558027	ENSG00000072364	1.25335	unchanged
422.662	-0.53599	0.165696	-3.23479	0.00121732	0.0559566	ENSG00000204498	1.25215	unchanged
23816.9	-0.473485	0.14641	-3.23397	0.00122081	0.0560428	ENSG00000155368	1.25148	unchanged
11.578	5.49562	1.70032	3.2321	0.00122884	0.0563369	ENSG00000181085	1.24921	unchanged
729.01	-0.485046	0.150119	-3.23108	0.00123325	0.0564647	ENSG00000197780	1.24822	unchanged
47323.4	0.341438	0.105808	3.22697	0.00125107	0.0569803	ENSG00000135744	1.24428	unchanged
1540.92	-0.438103	0.13573	-3.22776	0.00124764	0.0569803	ENSG00000121542	1.24428	unchanged
330.956	-0.76094	0.235801	-3.22704	0.00125079	0.0569803	ENSG00000118777	1.24428	unchanged
1411.94	0.398661	0.123521	3.22748	0.00124884	0.0569803	ENSG00000171160	1.24428	unchanged
316.235	0.692403	0.214695	3.22506	0.00125947	0.0572878	ENSG00000167981	1.24194	unchanged
16425.9	-0.385368	0.119546	-3.22358	0.00126597	0.0574607	ENSG00000140264	1.24063	unchanged
13936.8	-0.362874	0.112573	-3.22345	0.00126658	0.0574607	ENSG00000142541	1.24063	unchanged
2088.05	0.496955	0.154214	3.22251	0.00127074	0.0575744	ENSG00000173826	1.23977	unchanged
5902.22	-0.503102	0.156203	-3.22083	0.0012782	0.0577615	ENSG00000112306	1.23836	unchanged
1217.32	-0.412788	0.12816	-3.22087	0.001278	0.0577615	ENSG00000139737	1.23836	unchanged
5.70871	5.9485	1.84733	3.22006	0.00128165	0.0577671	ENSG00000196787	1.23832	unchanged
6684.36	-0.456105	0.141635	-3.22029	0.00128061	0.0577671	ENSG00000125995	1.23832	unchanged
18939.4	-0.31786	0.0987404	-3.21915	0.00128573	0.0578761	ENSG00000163499	1.2375	unchanged
674.936	-0.546956	0.169983	-3.21771	0.00129216	0.0580905	ENSG00000223941	1.23589	unchanged
4499.92	-0.308344	0.0958638	-3.21648	0.00129771	0.0582647	ENSG00000167775	1.23459	unchanged
4540.08	-0.317835	0.0988508	-3.2153	0.00130309	0.0584307	ENSG00000106400	1.23336	unchanged
991.615	0.413426	0.128628	3.21413	0.0013084	0.058593	ENSG00000160208	1.23215	unchanged
15.059	-3.1131	0.96887	-3.21313	0.00131298	0.0587227	ENSG00000228055	1.23119	unchanged
4858.77	-0.325773	0.101409	-3.21248	0.00131597	0.0587803	ENSG00000166794	1.23077	unchanged
3477.96	0.364736	0.113572	3.2115	0.00132046	0.0589054	ENSG00000198932	1.22984	unchanged
700.245	-0.644561	0.200778	-3.21032	0.00132589	0.0589498	ENSG00000183150	1.22952	unchanged
97.83	-2.09936	0.65397	-3.21017	0.00132654	0.0589498	ENSG00000137812	1.22952	unchanged
3526.1	-0.336732	0.104875	-3.21079	0.0013237	0.0589498	ENSG00000174917	1.22952	unchanged
1143.21	0.617171	0.19233	3.20892	0.00133236	0.0591328	ENSG00000010292	1.22817	unchanged
1439.81	-0.365768	0.114052	-3.20702	0.00134118	0.059448	ENSG00000059691	1.22586	unchanged
317.47	0.813913	0.2539	3.20565	0.00134757	0.0596554	ENSG00000153093	1.22435	unchanged
1901.1	-0.467114	0.145853	-3.20263	0.00136179	0.060208	ENSG00000172339	1.22035	unchanged
1269.43	-0.490216	0.153158	-3.20073	0.00137081	0.06053	ENSG00000053108	1.21803	unchanged
8079.68	0.294524	0.0920931	3.19812	0.00138329	0.0610032	ENSG00000198794	1.21465	unchanged
2437	-0.395472	0.123764	-3.19538	0.00139647	0.0615067	ENSG00000100196	1.21108	unchanged
7378.96	-0.400818	0.125486	-3.19411	0.0014026	0.061655	ENSG00000129235	1.21003	unchanged
1.28723	-14.0708	4.40544	-3.19395	0.00140339	0.061655	ENSG00000225731	1.21003	unchanged
790.588	0.774793	0.242953	3.18907	0.00142733	0.0626278	ENSG00000112659	1.20323	unchanged
1246.7	-0.58455	0.183377	-3.18769	0.00143416	0.0628481	ENSG00000100292	1.20171	unchanged
1614.84	-0.367955	0.115472	-3.18654	0.00143988	0.063019	ENSG00000137767	1.20053	unchanged
1481.31	-0.374494	0.117582	-3.18496	0.00144774	0.0632039	ENSG00000100711	1.19926	unchanged
10940.6	-0.308546	0.0968677	-3.18523	0.0014464	0.0632039	ENSG00000183978	1.19926	unchanged
148.506	1.16343	0.365364	3.18431	0.00145097	0.0632656	ENSG00000124713	1.19883	unchanged
1919.75	-2.47945	0.778777	-3.18378	0.00145367	0.063304	ENSG00000006016	1.19857	unchanged
4758.3	-0.311728	0.0979232	-3.18339	0.00145562	0.0633095	ENSG00000165646	1.19853	unchanged
5629.65	0.515235	0.161945	3.18153	0.00146497	0.0636045	ENSG00000155849	1.19651	unchanged
7484.17	-0.338509	0.106405	-3.18132	0.00146606	0.0636045	ENSG00000131981	1.19651	unchanged
1952.35	0.375061	0.117931	3.18034	0.00147103	0.0637402	ENSG00000179941	1.19559	unchanged
31630.5	-0.262627	0.082602	-3.17942	0.00147568	0.0638598	ENSG00000163902	1.19477	unchanged
1490.79	-0.386201	0.121482	-3.17907	0.00147746	0.0638598	ENSG00000087842	1.19477	unchanged
1.73149	13.9695	4.39598	3.1778	0.001484	0.0640625	ENSG00000255299	1.1934	unchanged
3116.17	0.306389	0.0964765	3.17579	0.00149428	0.0642671	ENSG00000169504	1.19201	unchanged
7850.82	-0.316576	0.099679	-3.17595	0.00149346	0.0642671	ENSG00000114115	1.19201	unchanged
699.302	0.723611	0.227844	3.17591	0.0014937	0.0642671	ENSG00000123453	1.19201	unchanged
245.372	0.888114	0.279729	3.1749	0.00149886	0.0643843	ENSG00000124507	1.19122	unchanged
34.3958	-2.92471	0.921394	-3.17423	0.00150237	0.0644523	ENSG00000174343	1.19076	unchanged
28.6476	-1.79589	0.565869	-3.17368	0.0015052	0.0644523	ENSG00000231651	1.19076	unchanged
10118.6	-0.423774	0.133534	-3.17352	0.00150601	0.0644523	ENSG00000135390	1.19076	unchanged
8512.65	-0.473826	0.149328	-3.17305	0.00150848	0.0644788	ENSG00000189266	1.19058	unchanged
19772.2	-0.422602	0.133246	-3.1716	0.00151603	0.064722	ENSG00000122026	1.18895	unchanged
1248.47	0.393159	0.124031	3.16985	0.0015252	0.0650332	ENSG00000108439	1.18686	unchanged
5.81884	6.16072	1.94499	3.16749	0.00153761	0.0654823	ENSG00000172000	1.18388	unchanged
244.902	0.727658	0.23001	3.1636	0.00155832	0.0662019	ENSG00000226564	1.17913	unchanged
6178.56	0.588219	0.185917	3.16388	0.00155681	0.0662019	ENSG00000111331	1.17913	unchanged
1.64962	13.8183	4.37098	3.16137	0.0015703	0.0666295	ENSG00000286691	1.17633	unchanged
7947.32	-0.268211	0.0849011	-3.15909	0.0015826	0.0670695	ENSG00000171303	1.17348	unchanged
3265.13	0.32709	0.103584	3.15772	0.0015901	0.0673053	ENSG00000062650	1.17195	unchanged
290.507	-0.729609	0.231143	-3.15652	0.00159662	0.0674988	ENSG00000230387	1.1707	unchanged
23240.9	-0.301109	0.0954817	-3.15358	0.0016128	0.067967	ENSG00000140988	1.1677	unchanged
3855.23	-0.297378	0.0943026	-3.15345	0.00161355	0.067967	ENSG00000105401	1.1677	unchanged
3938.2	-0.355574	0.112757	-3.15344	0.00161356	0.067967	ENSG00000105193	1.1677	unchanged
37.4236	2.07583	0.659001	3.14997	0.00163287	0.0686973	ENSG00000108381	1.16306	unchanged
1069.19	-0.515678	0.16378	-3.1486	0.00164052	0.0689355	ENSG00000079150	1.16156	unchanged
172.024	0.860836	0.273524	3.1472	0.00164843	0.0691008	ENSG00000163462	1.16052	unchanged
2171.39	0.397074	0.126159	3.14741	0.00164723	0.0691008	ENSG00000119638	1.16052	unchanged
2327.68	0.370041	0.117734	3.14303	0.00167207	0.0700074	ENSG00000005007	1.15486	unchanged
114.69	1.04517	0.332645	3.14199	0.00167803	0.0701721	ENSG00000272654	1.15384	unchanged
2143.98	0.693201	0.220735	3.14041	0.0016871	0.0702979	ENSG00000204291	1.15306	unchanged
175.8	0.911176	0.290083	3.14109	0.00168322	0.0702979	ENSG00000089091	1.15306	unchanged
948.457	-0.442444	0.140878	-3.14062	0.00168591	0.0702979	ENSG00000213753	1.15306	unchanged
730.096	-0.500454	0.159456	-3.13851	0.00169809	0.0706712	ENSG00000148123	1.15076	unchanged
750.461	0.639687	0.203879	3.13758	0.00170349	0.0708109	ENSG00000185252	1.1499	unchanged
3117.32	0.38511	0.122826	3.13541	0.00171613	0.0712511	ENSG00000166170	1.14721	unchanged
80.3742	1.34198	0.428163	3.13428	0.00172276	0.0714413	ENSG00000227268	1.14605	unchanged
385.005	0.704856	0.224981	3.13296	0.00173054	0.0714529	ENSG00000146592	1.14598	unchanged
7146.45	-0.42084	0.134341	-3.13263	0.00173246	0.0714529	ENSG00000136930	1.14598	unchanged
935.923	-0.568153	0.181329	-3.13328	0.00172867	0.0714529	ENSG00000137831	1.14598	unchanged
15306.4	-0.364255	0.116283	-3.13249	0.00173333	0.0714529	ENSG00000108298	1.14598	unchanged
3218.37	-0.320701	0.102368	-3.13281	0.00173143	0.0714529	ENSG00000184076	1.14598	unchanged
603.004	0.737605	0.235559	3.1313	0.00174035	0.0715801	ENSG00000134716	1.14521	unchanged
7.21537	6.82564	2.17983	3.13127	0.00174053	0.0715801	ENSG00000286717	1.14521	unchanged
271.774	-0.990299	0.31634	-3.13049	0.00174514	0.0716003	ENSG00000132854	1.14509	unchanged
642.649	-0.677217	0.21632	-3.13063	0.00174433	0.0716003	ENSG00000006606	1.14509	unchanged
1692.9	0.37898	0.121101	3.12947	0.00175124	0.0717656	ENSG00000198900	1.14408	unchanged
4681.03	-0.300902	0.096182	-3.12847	0.0017572	0.0718191	ENSG00000197982	1.14376	unchanged
2169.7	0.375213	0.119929	3.12863	0.00175621	0.0718191	ENSG00000157500	1.14376	unchanged
4021.32	-0.332871	0.106409	-3.12821	0.00175874	0.0718191	ENSG00000184990	1.14376	unchanged
288.463	0.91425	0.292384	3.12688	0.00176672	0.07206	ENSG00000112812	1.14231	unchanged
1746.26	-0.465948	0.149061	-3.12588	0.00177272	0.0722203	ENSG00000131495	1.14134	unchanged
1746.82	0.707313	0.226326	3.12519	0.00177689	0.0723053	ENSG00000090382	1.14083	unchanged
808.938	-0.956637	0.306421	-3.12197	0.00179645	0.0728454	ENSG00000107404	1.1376	unchanged
920.77	-0.512	0.163991	-3.12212	0.00179555	0.0728454	ENSG00000104524	1.1376	unchanged
521.554	-0.672536	0.215412	-3.1221	0.00179567	0.0728454	ENSG00000288778	1.1376	unchanged
6627.09	0.427393	0.13706	3.11829	0.00181901	0.0736743	ENSG00000240694	1.13268	unchanged
3999.21	-0.350653	0.112473	-3.11766	0.0018229	0.0737459	ENSG00000078098	1.13226	unchanged
2000.3	0.347772	0.111584	3.11668	0.00182902	0.0738216	ENSG00000103723	1.13182	unchanged
482.735	-0.461594	0.148089	-3.11701	0.00182698	0.0738216	ENSG00000101084	1.13182	unchanged
19.1014	-3.80269	1.22053	-3.11562	0.0018356	0.0740011	ENSG00000275385	1.13076	unchanged
4558.28	-0.478101	0.153488	-3.1149	0.00184006	0.0740948	ENSG00000150779	1.13021	unchanged
1255.77	-0.455696	0.146322	-3.11434	0.00184354	0.0741492	ENSG00000205659	1.12989	unchanged
6956.89	-0.405772	0.130445	-3.11068	0.00186655	0.074988	ENSG00000169976	1.12501	unchanged
5195.4	0.343331	0.110397	3.10998	0.00187103	0.075081	ENSG00000155016	1.12447	unchanged
376.925	0.652102	0.209726	3.10931	0.00187525	0.0751635	ENSG00000173083	1.12399	unchanged
2381.26	0.440152	0.141801	3.10401	0.00190919	0.0764357	ENSG00000117676	1.1167	unchanged
2763.41	-0.446618	0.143978	-3.10199	0.00192227	0.0766945	ENSG00000242485	1.11524	unchanged
222.668	-0.970943	0.312972	-3.10233	0.00192005	0.0766945	ENSG00000017483	1.11524	unchanged
619.66	-0.629636	0.202965	-3.10219	0.00192098	0.0766945	ENSG00000147889	1.11524	unchanged
27592.3	-0.431241	0.13905	-3.10134	0.00192647	0.0767738	ENSG00000198843	1.11479	unchanged
1241.83	-0.505162	0.163047	-3.09825	0.00194664	0.0774889	ENSG00000197798	1.11076	unchanged
21121.5	-0.339194	0.109561	-3.09593	0.001962	0.0780107	ENSG00000131236	1.10785	unchanged
863.422	0.400302	0.129383	3.09393	0.00197521	0.0784464	ENSG00000048342	1.10543	unchanged
5569.29	-0.311011	0.100566	-3.09261	0.00198406	0.0787079	ENSG00000198356	1.10398	unchanged
6790.56	-0.356929	0.115473	-3.09101	0.00199475	0.0790416	ENSG00000197006	1.10214	unchanged
5.51105	-6.4098	2.07393	-3.09066	0.00199713	0.0790458	ENSG00000124721	1.10212	unchanged
4351.25	0.35972	0.116453	3.08896	0.00200862	0.0794101	ENSG00000141232	1.10012	unchanged
458.638	0.876671	0.283972	3.08718	0.00202067	0.0794501	ENSG00000111846	1.09991	unchanged
3518.79	-0.471834	0.15284	-3.08712	0.00202106	0.0794501	ENSG00000120509	1.09991	unchanged
982.617	-0.393618	0.127491	-3.08741	0.00201907	0.0794501	ENSG00000171843	1.09991	unchanged
2758.13	0.487387	0.15783	3.08805	0.00201473	0.0794501	ENSG00000165219	1.09991	unchanged
7672.9	-0.256085	0.0829516	-3.08716	0.00202077	0.0794501	ENSG00000168209	1.09991	unchanged
7408.59	-0.456539	0.147935	-3.08607	0.0020282	0.0796408	ENSG00000104368	1.09886	unchanged
5750.39	-0.451154	0.14629	-3.08397	0.00204257	0.0801142	ENSG00000179933	1.09629	unchanged
1875.45	-0.333938	0.108322	-3.08284	0.00205039	0.0803303	ENSG00000171450	1.09512	unchanged
1.00297	-13.5195	4.38955	-3.07993	0.00207051	0.0810273	ENSG00000202360	1.09137	unchanged
15179.2	-0.448578	0.145663	-3.07957	0.00207301	0.0810338	ENSG00000135940	1.09133	unchanged
52183.1	-0.534712	0.173746	-3.07754	0.00208716	0.0814954	ENSG00000110651	1.08887	unchanged
4827.07	-0.37711	0.12262	-3.07543	0.002102	0.0819265	ENSG00000063660	1.08658	unchanged
823.892	0.477171	0.155163	3.0753	0.00210292	0.0819265	ENSG00000178904	1.08658	unchanged
1856.66	-0.360006	0.117114	-3.07399	0.00211214	0.0821937	ENSG00000141562	1.08516	unchanged
2609.84	0.317399	0.103338	3.07146	0.00213014	0.0828014	ENSG00000154822	1.08196	unchanged
910.003	-0.660872	0.215324	-3.06919	0.00214639	0.08334	ENSG00000204160	1.07915	unchanged
2233.83	-0.41934	0.136648	-3.06877	0.00214945	0.0833442	ENSG00000134809	1.07912	unchanged
1408.14	-0.37291	0.121528	-3.06851	0.0021513	0.0833442	ENSG00000124302	1.07912	unchanged
65.3317	-1.50442	0.490398	-3.06775	0.00215679	0.0833711	ENSG00000060718	1.07898	unchanged
6139.57	-0.429465	0.139982	-3.068	0.00215496	0.0833711	ENSG00000183648	1.07898	unchanged
1187.48	-0.471765	0.153896	-3.06548	0.00217319	0.0838425	ENSG00000143479	1.07654	unchanged
216.679	-0.672216	0.219292	-3.0654	0.00217381	0.0838425	ENSG00000259781	1.07654	unchanged
111326	-0.33637	0.109744	-3.06505	0.00217636	0.0838477	ENSG00000108821	1.07651	unchanged
6.66538	-5.84288	1.90686	-3.06414	0.002183	0.0840105	ENSG00000113722	1.07567	unchanged
1486.64	-0.39015	0.127382	-3.06283	0.00219257	0.0842852	ENSG00000164294	1.07425	unchanged
45.6154	-1.60084	0.522783	-3.06214	0.00219759	0.0843849	ENSG00000248187	1.07374	unchanged
18889.6	-0.337946	0.110453	-3.05965	0.00221597	0.0848647	ENSG00000122406	1.07127	unchanged
15507.1	-0.438725	0.14338	-3.05988	0.00221423	0.0848647	ENSG00000135046	1.07127	unchanged
76.7926	1.31323	0.429274	3.0592	0.0022193	0.0848647	ENSG00000167103	1.07127	unchanged
49.5013	-1.46297	0.47823	-3.05912	0.00221985	0.0848647	ENSG00000182612	1.07127	unchanged
11360.6	-0.426557	0.139667	-3.0541	0.00225737	0.0859488	ENSG00000177954	1.06576	unchanged
393.502	0.620177	0.203029	3.05462	0.00225343	0.0859488	ENSG00000085276	1.06576	unchanged
3129.75	0.346998	0.113587	3.05491	0.00225129	0.0859488	ENSG00000177459	1.06576	unchanged
2825.82	0.291081	0.0953112	3.054	0.0022581	0.0859488	ENSG00000197183	1.06576	unchanged
519.653	-0.520305	0.170425	-3.05299	0.00226573	0.0861449	ENSG00000117862	1.06477	unchanged
135402	-0.228247	0.0747862	-3.05199	0.00227328	0.0863375	ENSG00000100604	1.0638	unchanged
2805.49	-0.427273	0.140039	-3.0511	0.00228007	0.0865008	ENSG00000198522	1.06298	unchanged
622.857	0.550929	0.18064	3.04988	0.00228934	0.0867579	ENSG00000087903	1.06169	unchanged
2495.23	0.595381	0.195288	3.04873	0.00229808	0.0869941	ENSG00000143515	1.06051	unchanged
121.627	1.20045	0.39435	3.04411	0.00233367	0.0882453	ENSG00000263956	1.05431	unchanged
909.676	0.845034	0.277701	3.04297	0.00234259	0.0884863	ENSG00000145703	1.05312	unchanged
1343.07	-0.450044	0.147939	-3.0421	0.00234933	0.0886444	ENSG00000130529	1.05235	unchanged
2081.77	-0.366864	0.120651	-3.0407	0.00236028	0.0887611	ENSG00000128581	1.05178	unchanged
940.128	-0.475323	0.156336	-3.0404	0.00236264	0.0887611	ENSG00000122952	1.05178	unchanged
4102.54	-0.403416	0.132675	-3.04063	0.00236082	0.0887611	ENSG00000091640	1.05178	unchanged
242.882	0.937068	0.308134	3.04111	0.00235709	0.0887611	ENSG00000159212	1.05178	unchanged
365.708	0.637218	0.209611	3.04	0.00236577	0.0887829	ENSG00000123191	1.05167	unchanged
78.9845	2.33695	0.768885	3.03939	0.00237055	0.0888661	ENSG00000162631	1.05126	unchanged
5367.38	-0.44345	0.145956	-3.03823	0.0023797	0.0890023	ENSG00000143222	1.0506	unchanged
75.0237	2.38096	0.783657	3.03828	0.00237937	0.0890023	ENSG00000159784	1.0506	unchanged
359.18	0.875524	0.288195	3.03796	0.00238186	0.0890023	ENSG00000147459	1.0506	unchanged
4.96632	6.58983	2.1699	3.03693	0.00239001	0.0892108	ENSG00000258742	1.04958	unchanged
2949.43	0.456229	0.150291	3.03564	0.00240026	0.0894974	ENSG00000125875	1.04819	unchanged
4295.37	-0.474058	0.156292	-3.03316	0.00242004	0.0901382	ENSG00000103978	1.04509	unchanged
3829.13	0.291582	0.0962313	3.03002	0.00244541	0.0909854	ENSG00000146278	1.04103	unchanged
21.171	-2.17982	0.719571	-3.02933	0.00245097	0.0910948	ENSG00000288779	1.04051	unchanged
1755.98	-0.432373	0.142752	-3.02884	0.00245496	0.0911455	ENSG00000137168	1.04026	unchanged
289.322	-0.744126	0.245873	-3.02647	0.00247427	0.0917645	ENSG00000116014	1.03733	unchanged
2427.05	-0.379792	0.125531	-3.02547	0.00248244	0.0919695	ENSG00000132821	1.03636	unchanged
78.5263	-1.37495	0.454766	-3.02343	0.0024993	0.0924955	ENSG00000172548	1.03388	unchanged
1312.01	0.383672	0.12701	3.0208	0.00252107	0.0931648	ENSG00000137941	1.03075	unchanged
1809.33	0.389955	0.129099	3.0206	0.00252275	0.0931648	ENSG00000113360	1.03075	unchanged
650.26	-0.583645	0.193312	-3.01919	0.00253453	0.0934217	ENSG00000223797	1.02955	unchanged
9.61614	-6.92067	2.29228	-3.01912	0.00253508	0.0934217	ENSG00000168546	1.02955	unchanged
11628.7	-0.481898	0.159665	-3.01818	0.00254294	0.093612	ENSG00000197061	1.02867	unchanged
33.6574	-2.81558	0.933268	-3.0169	0.00255371	0.0939091	ENSG00000254510	1.02729	unchanged
5208.99	-0.324121	0.107448	-3.01653	0.00255686	0.0939253	ENSG00000103415	1.02722	unchanged
48.1076	1.3715	0.454801	3.01561	0.00256466	0.0940131	ENSG00000288752	1.02681	unchanged
17787.6	0.242472	0.0804018	3.01575	0.00256346	0.0940131	ENSG00000139641	1.02681	unchanged
4156.63	0.315482	0.104653	3.01454	0.00257368	0.0942446	ENSG00000162819	1.02574	unchanged
166.467	1.5627	0.519107	3.01037	0.00260932	0.0954488	ENSG00000157087	1.02023	unchanged
1141.39	0.447199	0.148648	3.00843	0.00262598	0.0959575	ENSG00000137815	1.01792	unchanged
1412.6	-0.426221	0.141692	-3.00808	0.00262902	0.0959673	ENSG00000119650	1.01788	unchanged
7067.23	-0.458157	0.152481	-3.00469	0.00265853	0.096943	ENSG00000144713	1.01348	unchanged
2162.82	-0.368842	0.122787	-3.00391	0.00266531	0.0970838	ENSG00000138639	1.01285	unchanged
342.812	0.709962	0.23637	3.00361	0.00266798	0.0970838	ENSG00000006062	1.01285	unchanged
592.314	-0.443009	0.147661	-3.00017	0.00269831	0.0980106	ENSG00000110063	1.00873	unchanged
7556.87	-0.466429	0.155489	-2.99976	0.00270191	0.0980106	ENSG00000131469	1.00873	unchanged
2615.85	-0.342489	0.114162	-3.00003	0.00269957	0.0980106	ENSG00000176014	1.00873	unchanged
1097.17	-0.421488	0.140537	-2.99912	0.00270761	0.098115	ENSG00000005001	1.00826	unchanged
54.4434	1.47245	0.491164	2.99788	0.00271862	0.0984107	ENSG00000277782	1.00696	unchanged
14.7205	4.69059	1.5648	2.99757	0.00272144	0.0984107	ENSG00000124256	1.00696	unchanged
1142.17	0.448982	0.149798	2.99725	0.00272428	0.0984112	ENSG00000154124	1.00696	unchanged
2433.29	0.438944	0.146491	2.99638	0.00273209	0.0985906	ENSG00000134324	1.00616	unchanged
125.766	-0.882145	0.294468	-2.99573	0.00273788	0.0986448	ENSG00000286308	1.00593	unchanged
900.362	-0.787886	0.263016	-2.99558	0.00273927	0.0986448	ENSG00000176387	1.00593	unchanged
95.1238	1.09748	0.366423	2.99512	0.00274339	0.0986911	ENSG00000179240	1.00572	unchanged
65.6837	-1.29225	0.43184	-2.99244	0.00276759	0.0994586	ENSG00000153885	1.00236	unchanged
6611.42	-0.424583	0.141913	-2.99186	0.00277284	0.0995443	ENSG00000184983	1.00198	unchanged
312.286	-0.649192	0.217036	-2.99117	0.00277909	0.0996657	ENSG00000215217	1.00145	unchanged
1316.73	0.494929	0.165494	2.99061	0.00278421	0.0997465	ENSG00000172007	1.0011	unchanged
1544.33	0.457169	0.153106	2.98596	0.00282692	0.101153	ENSG00000148229	0.995022	unchanged
1773.51	0.403537	0.135156	2.9857	0.00282929	0.101153	ENSG00000119906	0.995022	unchanged
6132.7	-0.380272	0.127426	-2.98426	0.00284266	0.101527	ENSG00000188846	0.99342	unchanged
2003.37	-0.377459	0.126503	-2.9838	0.00284693	0.101575	ENSG00000140259	0.993215	unchanged
3035.21	0.314871	0.105555	2.98301	0.00285427	0.101719	ENSG00000061987	0.992596	unchanged
289.479	-0.641265	0.214992	-2.98274	0.00285684	0.101719	ENSG00000229833	0.992596	unchanged
88.99	-1.42474	0.477933	-2.98105	0.00287265	0.102178	ENSG00000156466	0.990645	unchanged
8191.44	-0.457449	0.15349	-2.98032	0.00287949	0.102271	ENSG00000100234	0.990247	unchanged
2845.43	-0.261545	0.0877625	-2.98014	0.00288117	0.102271	ENSG00000100142	0.990247	unchanged
611.507	0.806751	0.270965	2.97733	0.00290769	0.103107	ENSG00000174951	0.98671	unchanged
48.2849	1.83502	0.616589	2.97609	0.00291948	0.10342	ENSG00000196242	0.985397	unchanged
5335.31	-0.405308	0.136251	-2.97472	0.00293254	0.103777	ENSG00000101843	0.9839	unchanged
4474.29	-0.36768	0.123627	-2.97411	0.00293837	0.103877	ENSG00000100300	0.983479	unchanged
3910.85	0.307777	0.1035	2.97369	0.00294245	0.103916	ENSG00000099622	0.983318	unchanged
791.068	0.534953	0.179983	2.97224	0.00295636	0.104301	ENSG00000196459	0.981712	unchanged
41.2689	-1.72731	0.58163	-2.96977	0.00298019	0.105035	ENSG00000125740	0.978666	unchanged
1320.58	0.556504	0.187492	2.96814	0.00299607	0.105275	ENSG00000150938	0.977677	unchanged
10703.1	-0.425185	0.143242	-2.96831	0.00299444	0.105275	ENSG00000198034	0.977677	unchanged
4330.43	-0.400691	0.134979	-2.96854	0.00299217	0.105275	ENSG00000242372	0.977677	unchanged
14.4968	2.9088	0.980992	2.96516	0.00302527	0.106193	ENSG00000247903	0.973904	unchanged
260.235	-0.873085	0.2946	-2.96363	0.00304038	0.106616	ENSG00000183578	0.972179	unchanged
25.6501	-4.12055	1.39061	-2.96313	0.00304524	0.106679	ENSG00000280287	0.971922	unchanged
2164.41	0.53548	0.180827	2.96128	0.00306362	0.107214	ENSG00000115760	0.969746	unchanged
287.425	-0.72644	0.245413	-2.96007	0.00307568	0.107432	ENSG00000163209	0.968865	unchanged
776.666	0.48676	0.164444	2.96004	0.00307603	0.107432	ENSG00000149346	0.968865	unchanged
13592.4	-0.428485	0.144817	-2.95881	0.00308831	0.107435	ENSG00000071082	0.968855	unchanged
45.2041	-1.61206	0.545042	-2.95768	0.00309966	0.107435	ENSG00000178631	0.968855	unchanged
2339.3	0.251108	0.0848794	2.95841	0.00309226	0.107435	ENSG00000147548	0.968855	unchanged
1995.48	0.317637	0.107363	2.95854	0.00309103	0.107435	ENSG00000170873	0.968855	unchanged
3087.38	-0.421573	0.142541	-2.95756	0.00310084	0.107435	ENSG00000137038	0.968855	unchanged
1577.01	-0.411565	0.13914	-2.95793	0.00309711	0.107435	ENSG00000174547	0.968855	unchanged
3086.44	-0.382388	0.129221	-2.95918	0.00308454	0.107435	ENSG00000065621	0.968855	unchanged
67242.8	-0.222921	0.0753702	-2.95769	0.00309957	0.107435	ENSG00000067225	0.968855	unchanged
198.642	0.70618	0.23896	2.95522	0.00312444	0.108145	ENSG00000204071	0.965994	unchanged
44964.9	-0.216821	0.0733797	-2.95478	0.00312896	0.108194	ENSG00000172270	0.965798	unchanged
5408.12	-0.382001	0.129334	-2.95361	0.00314083	0.108282	ENSG00000010270	0.965445	unchanged
1111.85	-0.474651	0.160719	-2.9533	0.00314398	0.108282	ENSG00000157399	0.965445	unchanged
56986.1	-0.417797	0.141455	-2.95356	0.00314127	0.108282	ENSG00000165092	0.965445	unchanged
459.873	0.668674	0.226392	2.95362	0.00314074	0.108282	ENSG00000165029	0.965445	unchanged
4977.51	-0.418143	0.141682	-2.95128	0.00316464	0.108787	ENSG00000139874	0.963423	unchanged
4706.56	0.542661	0.183875	2.95125	0.00316491	0.108787	ENSG00000125107	0.963423	unchanged
1136.36	0.510479	0.173055	2.94981	0.00317967	0.109079	ENSG00000170500	0.962259	unchanged
91.6459	1.86979	0.633852	2.94988	0.00317897	0.109079	ENSG00000214207	0.962259	unchanged
8554.79	-0.348923	0.118303	-2.9494	0.00318387	0.109115	ENSG00000103363	0.962116	unchanged
2138.69	-0.398394	0.135114	-2.94857	0.00319248	0.109303	ENSG00000156958	0.96137	unchanged
3363.48	-0.467817	0.158789	-2.94616	0.00321745	0.110002	ENSG00000038002	0.958599	unchanged
5185.42	-0.355365	0.120627	-2.94599	0.00321925	0.110002	ENSG00000198755	0.958599	unchanged
25.491	-3.98258	1.35206	-2.94556	0.00322371	0.110046	ENSG00000215853	0.958425	unchanged
4007.79	0.45609	0.155091	2.94078	0.00327382	0.111647	ENSG00000173193	0.952152	unchanged
206.29	1.06826	0.36334	2.94013	0.00328078	0.111775	ENSG00000155666	0.951656	unchanged
1392.74	-0.547717	0.186343	-2.93929	0.00328968	0.111968	ENSG00000109762	0.950905	unchanged
742.942	0.743896	0.25323	2.93762	0.00330737	0.11246	ENSG00000072121	0.949001	unchanged
53.3643	1.61638	0.550385	2.93681	0.00331603	0.112644	ENSG00000180210	0.94829	unchanged
624.767	0.450943	0.15358	2.9362	0.00332263	0.112706	ENSG00000113319	0.948054	unchanged
53.6268	1.51731	0.516789	2.93604	0.00332432	0.112706	ENSG00000277639	0.948054	unchanged
2696.72	-0.370679	0.126337	-2.93404	0.00334581	0.113126	ENSG00000160688	0.946436	unchanged
584.96	0.484284	0.16504	2.93433	0.00334267	0.113126	ENSG00000130962	0.946436	unchanged
48580.5	-0.282905	0.0964238	-2.93398	0.00334649	0.113126	ENSG00000111669	0.946436	unchanged
985.751	-0.52812	0.18013	-2.93189	0.00336911	0.11378	ENSG00000089123	0.943933	unchanged
1689.27	0.361392	0.123277	2.93153	0.00337292	0.113798	ENSG00000181754	0.943864	unchanged
5761.62	0.277752	0.0947663	2.93091	0.0033797	0.113917	ENSG00000119125	0.943413	unchanged
238.259	0.882622	0.301251	2.92986	0.00339117	0.114192	ENSG00000144550	0.942363	unchanged
1582.91	-0.351298	0.119961	-2.92843	0.00340683	0.114609	ENSG00000116157	0.940782	unchanged
8676.47	-0.45264	0.154783	-2.92434	0.00345183	0.115948	ENSG00000162244	0.935737	unchanged
19.4436	4.50969	1.54219	2.92421	0.00345331	0.115948	ENSG00000166148	0.935737	unchanged
1406.64	-0.366181	0.125306	-2.92229	0.00347471	0.116554	ENSG00000137692	0.933474	unchanged
2740.81	-0.531056	0.181794	-2.92119	0.00348695	0.116851	ENSG00000162692	0.932366	unchanged
4500.31	0.305621	0.104655	2.92026	0.00349735	0.116974	ENSG00000173258	0.931909	unchanged
102.337	-1.22553	0.419642	-2.92043	0.00349554	0.116974	ENSG00000159251	0.931909	unchanged
513.54	0.601182	0.205944	2.91916	0.00350977	0.117277	ENSG00000155465	0.930787	unchanged
1655.21	-0.388156	0.132989	-2.91871	0.00351482	0.117333	ENSG00000147364	0.93058	unchanged
4814.5	-0.357985	0.122735	-2.91673	0.00353726	0.117969	ENSG00000129255	0.928233	unchanged
9480.33	-0.350014	0.120049	-2.91559	0.00355014	0.118205	ENSG00000117450	0.927363	unchanged
1993.33	0.339131	0.116344	2.91491	0.00355796	0.118205	ENSG00000142765	0.927363	unchanged
2180.27	0.292186	0.100234	2.91504	0.00355644	0.118205	ENSG00000115504	0.927363	unchanged
3747.87	-0.32122	0.110194	-2.91503	0.00355659	0.118205	ENSG00000125912	0.927363	unchanged
209.253	0.951849	0.326627	2.91417	0.0035663	0.118369	ENSG00000115687	0.926761	unchanged
144.41	0.893846	0.306789	2.91355	0.00357341	0.118492	ENSG00000232160	0.926311	unchanged
13.3426	3.49367	1.19963	2.91228	0.00358799	0.118749	ENSG00000250208	0.925371	unchanged
514.103	-0.446482	0.153298	-2.91252	0.00358529	0.118749	ENSG00000179965	0.925371	unchanged
1144.55	0.465246	0.159839	2.91072	0.003606	0.119231	ENSG00000120071	0.92361	unchanged
4.22907	5.688	1.95609	2.90784	0.00363938	0.120221	ENSG00000273004	0.92002	unchanged
11193.6	-0.367368	0.126382	-2.90682	0.00365125	0.120498	ENSG00000109475	0.919019	unchanged
6345.68	-0.336435	0.115832	-2.90452	0.0036782	0.121272	ENSG00000126088	0.916238	unchanged
662.28	0.83586	0.287863	2.90367	0.00368817	0.121371	ENSG00000204219	0.915885	unchanged
173.012	-0.98314	0.338571	-2.90379	0.00368676	0.121371	ENSG00000239474	0.915885	unchanged
7612.69	-0.26023	0.0896659	-2.90222	0.00370523	0.121558	ENSG00000159352	0.915217	unchanged
9397.32	-0.317295	0.109348	-2.90171	0.00371135	0.121558	ENSG00000254999	0.915217	unchanged
8.65766	-4.74898	1.63612	-2.90258	0.003701	0.121558	ENSG00000169064	0.915217	unchanged
6837.71	0.326463	0.112493	2.90209	0.00370686	0.121558	ENSG00000166900	0.915217	unchanged
3191.18	-0.587039	0.202301	-2.90181	0.00371016	0.121558	ENSG00000276168	0.915217	unchanged
104.835	1.54601	0.533165	2.89967	0.0037355	0.122234	ENSG00000219159	0.912808	unchanged
12.4605	3.8165	1.31656	2.89885	0.00374534	0.122325	ENSG00000280347	0.912483	unchanged
8.10351	4.7017	1.62182	2.89902	0.0037433	0.122325	ENSG00000213420	0.912483	unchanged
67.4843	-2.6334	0.908626	-2.89822	0.00375283	0.122455	ENSG00000187955	0.912023	unchanged
16932.8	-0.284393	0.0981947	-2.89622	0.0037769	0.122664	ENSG00000155660	0.911281	unchanged
4467.15	-0.373762	0.129004	-2.89729	0.00376401	0.122664	ENSG00000205133	0.911281	unchanged
2155.5	0.452298	0.156161	2.89636	0.00377517	0.122664	ENSG00000137075	0.911281	unchanged
111549	-0.372135	0.128474	-2.89659	0.00377239	0.122664	ENSG00000109971	0.911281	unchanged
605.878	0.553211	0.190999	2.8964	0.00377465	0.122664	ENSG00000196967	0.911281	unchanged
1078.07	0.525533	0.181536	2.89492	0.00379252	0.123057	ENSG00000102218	0.909895	unchanged
1571.31	0.377778	0.130524	2.89432	0.00379976	0.123177	ENSG00000184349	0.909471	unchanged
10232.7	0.316483	0.109386	2.89327	0.00381255	0.123476	ENSG00000165476	0.908417	unchanged
840.341	-0.483459	0.167186	-2.89174	0.0038312	0.123849	ENSG00000143224	0.907107	unchanged
4405.16	-0.270628	0.0935816	-2.89189	0.00382933	0.123849	ENSG00000170889	0.907107	unchanged
1728.23	-0.314265	0.108713	-2.89077	0.00384301	0.124116	ENSG00000167118	0.906174	unchanged
17999.3	-0.301545	0.104367	-2.88926	0.0038615	0.124294	ENSG00000116288	0.905551	unchanged
18464.4	-0.377941	0.130785	-2.88978	0.00385509	0.124294	ENSG00000008018	0.905551	unchanged
3747.74	-0.291357	0.100845	-2.88915	0.00386283	0.124294	ENSG00000168002	0.905551	unchanged
7817.6	-0.24376	0.0843601	-2.88952	0.00385831	0.124294	ENSG00000160014	0.905551	unchanged
129.212	-1.89993	0.657726	-2.88864	0.0038691	0.12438	ENSG00000188483	0.905249	unchanged
17.4838	-3.96038	1.37126	-2.88813	0.00387539	0.124467	ENSG00000185811	0.904945	unchanged
1212.87	0.533151	0.184636	2.88758	0.00388216	0.12457	ENSG00000124120	0.904588	unchanged
3769.23	0.415876	0.144042	2.88718	0.00388717	0.124615	ENSG00000171766	0.904429	unchanged
1923.57	-0.378579	0.131167	-2.88623	0.00389885	0.124748	ENSG00000117308	0.903965	unchanged
1484.8	-0.558384	0.193448	-2.88648	0.00389582	0.124748	ENSG00000151093	0.903965	unchanged
594.391	-0.500062	0.173291	-2.88568	0.00390568	0.124748	ENSG00000271147	0.903965	unchanged
510.468	0.444774	0.154122	2.88586	0.0039034	0.124748	ENSG00000148225	0.903965	unchanged
1986.64	-0.481086	0.166756	-2.88496	0.00391461	0.124919	ENSG00000113083	0.903372	unchanged
274.046	-0.714883	0.247856	-2.88426	0.00392332	0.125082	ENSG00000171163	0.902806	unchanged
2110.52	0.384992	0.133496	2.88392	0.00392753	0.125101	ENSG00000182541	0.902738	unchanged
1352.55	0.502655	0.174317	2.88356	0.00393205	0.125131	ENSG00000117707	0.902636	unchanged
6361.82	0.262192	0.0909705	2.88217	0.00394952	0.125457	ENSG00000081760	0.901505	unchanged
1065.12	0.377573	0.130998	2.88227	0.00394816	0.125457	ENSG00000267100	0.901505	unchanged
904.432	-0.678613	0.235518	-2.88136	0.00395958	0.125661	ENSG00000112303	0.900798	unchanged
1274.53	0.417918	0.145082	2.88056	0.00396972	0.125868	ENSG00000113649	0.900084	unchanged
1378.45	0.312959	0.108696	2.87923	0.00398654	0.126286	ENSG00000187079	0.898644	unchanged
1402.4	0.351337	0.122072	2.87813	0.00400045	0.126606	ENSG00000119707	0.897546	unchanged
4156.1	-0.252509	0.087742	-2.87785	0.00400391	0.126606	ENSG00000169738	0.897546	unchanged
6954.66	-0.291083	0.10118	-2.8769	0.00401602	0.126873	ENSG00000175416	0.89663	unchanged
740.047	-0.492653	0.171284	-2.87623	0.00402459	0.127029	ENSG00000196867	0.896098	unchanged
688.947	0.626941	0.218121	2.87428	0.00404956	0.127701	ENSG00000171004	0.893807	unchanged
77.7872	-1.31805	0.458653	-2.87373	0.00405652	0.127802	ENSG00000091137	0.893462	unchanged
53949.8	-0.306217	0.106567	-2.87345	0.00406013	0.127802	ENSG00000136960	0.893462	unchanged
1007.43	-0.690188	0.240347	-2.87163	0.00408359	0.128424	ENSG00000139973	0.891353	unchanged
815.11	-0.518607	0.180632	-2.87107	0.0040908	0.128535	ENSG00000175324	0.89098	unchanged
1481.39	0.435727	0.151823	2.86996	0.00410522	0.128871	ENSG00000100350	0.889843	unchanged
199.905	0.828746	0.288905	2.86858	0.00412322	0.12932	ENSG00000112406	0.888336	unchanged
8037.48	-0.28801	0.100428	-2.86783	0.00413299	0.129509	ENSG00000174851	0.8877	unchanged
6861.07	-0.384513	0.134095	-2.86747	0.00413772	0.12954	ENSG00000105854	0.887595	unchanged
1657.6	0.352384	0.122913	2.86693	0.0041447	0.129642	ENSG00000139083	0.887254	unchanged
713.3	-0.467032	0.163069	-2.86401	0.00418315	0.130727	ENSG00000153086	0.883635	unchanged
1730.26	0.397104	0.138704	2.86296	0.00419699	0.131042	ENSG00000168297	0.88259	unchanged
44369.6	-0.226717	0.0792469	-2.8609	0.00422443	0.13178	ENSG00000100316	0.88015	unchanged
2993.87	0.481947	0.168582	2.85883	0.00425209	0.132499	ENSG00000064393	0.877787	unchanged
579.46	-0.464826	0.162622	-2.85832	0.00425891	0.132499	ENSG00000106538	0.877787	unchanged
859.099	0.383672	0.134224	2.85844	0.00425724	0.132499	ENSG00000135457	0.877787	unchanged
2128.51	-0.351018	0.12284	-2.85752	0.00426961	0.132713	ENSG00000131435	0.877087	unchanged
29662.4	-0.414253	0.14507	-2.85553	0.00429644	0.133428	ENSG00000113732	0.874754	unchanged
907.105	-0.799442	0.280156	-2.85356	0.00432322	0.13402	ENSG00000177614	0.872831	unchanged
650.336	0.571498	0.200258	2.85381	0.0043199	0.13402	ENSG00000171385	0.872831	unchanged
639.985	0.525572	0.184204	2.85321	0.00432807	0.134051	ENSG00000230487	0.872731	unchanged
4.82017	-5.01598	1.76126	-2.84795	0.0044002	0.136163	ENSG00000256464	0.86594	unchanged
1197.91	0.35632	0.125173	2.84662	0.00441859	0.136611	ENSG00000120896	0.864515	unchanged
1377.36	-0.316518	0.111234	-2.84551	0.00443405	0.136845	ENSG00000160959	0.863771	unchanged
1726.86	0.533473	0.187476	2.84555	0.00443343	0.136845	ENSG00000105270	0.863771	unchanged
236.435	-0.821863	0.288899	-2.84481	0.00444383	0.137025	ENSG00000178796	0.863199	unchanged
1861	0.295733	0.103979	2.84415	0.00445297	0.137186	ENSG00000012963	0.862692	unchanged
959.551	0.404049	0.142262	2.84017	0.00450899	0.138671	ENSG00000115526	0.858016	unchanged
1922.67	-0.38492	0.135528	-2.84016	0.00450916	0.138671	ENSG00000130332	0.858016	unchanged
2342.5	-0.312533	0.110056	-2.83976	0.00451478	0.138721	ENSG00000176101	0.857858	unchanged
108.665	1.04881	0.369445	2.83888	0.00452726	0.138981	ENSG00000102349	0.857044	unchanged
1247.21	0.676845	0.238507	2.83785	0.00454192	0.139308	ENSG00000166257	0.856023	unchanged
2738.55	-0.415794	0.146651	-2.83527	0.00457866	0.139941	ENSG00000117318	0.854054	unchanged
2193.99	0.254922	0.0898908	2.8359	0.00456961	0.139941	ENSG00000138385	0.854054	unchanged
557.135	0.561339	0.197947	2.83581	0.00457099	0.139941	ENSG00000236609	0.854054	unchanged
1332.37	0.572735	0.201999	2.83533	0.00457782	0.139941	ENSG00000186260	0.854054	unchanged
102.771	-0.937695	0.330876	-2.83398	0.0045972	0.140384	ENSG00000230533	0.852682	unchanged
2292.99	0.356617	0.125989	2.83053	0.00464703	0.141657	ENSG00000058091	0.848762	unchanged
18.7386	-2.00699	0.70905	-2.83054	0.00464696	0.141657	ENSG00000131668	0.848762	unchanged
1245.37	0.314277	0.111063	2.82972	0.00465891	0.141895	ENSG00000174943	0.848034	unchanged
119.395	0.830562	0.293625	2.82865	0.00467452	0.142245	ENSG00000188266	0.846962	unchanged
2172.37	0.268704	0.0951089	2.82523	0.00472471	0.143647	ENSG00000012983	0.842704	unchanged
2780.33	-0.353912	0.125333	-2.82378	0.00474605	0.143918	ENSG00000114491	0.841885	unchanged
17755.2	-0.450535	0.159539	-2.82397	0.00474323	0.143918	ENSG00000231500	0.841885	unchanged
7065.85	-0.285741	0.101171	-2.82433	0.00473799	0.143918	ENSG00000105669	0.841885	unchanged
27.6834	3.44714	1.22169	2.82162	0.00477817	0.144766	ENSG00000203688	0.839334	unchanged
4200.28	-0.249494	0.0884506	-2.82072	0.00479158	0.145046	ENSG00000176340	0.838496	unchanged
34260	-0.381361	0.135247	-2.81973	0.00480635	0.145366	ENSG00000211459	0.837538	unchanged
1205.74	-0.425931	0.151168	-2.8176	0.00483838	0.146135	ENSG00000176399	0.835247	unchanged
1810.74	-0.463791	0.164612	-2.81748	0.00484018	0.146135	ENSG00000183036	0.835247	unchanged
5623.72	-0.313465	0.111273	-2.81707	0.00484644	0.146197	ENSG00000185627	0.835063	unchanged
999.637	-0.543676	0.193019	-2.81669	0.00485208	0.14624	ENSG00000138386	0.834934	unchanged
5601.52	-0.289902	0.102947	-2.81602	0.00486223	0.146419	ENSG00000100994	0.834403	unchanged
2206.26	-0.383918	0.136368	-2.8153	0.00487318	0.146569	ENSG00000178537	0.833958	unchanged
1538.46	-0.380908	0.135307	-2.81514	0.00487565	0.146569	ENSG00000181751	0.833958	unchanged
2049.75	-0.308258	0.109541	-2.8141	0.00489145	0.146917	ENSG00000135617	0.832928	unchanged
1220.11	-0.353134	0.125538	-2.81297	0.00490868	0.147307	ENSG00000165819	0.831777	unchanged
170.665	1.58226	0.562964	2.81058	0.00494524	0.148276	ENSG00000132932	0.828928	unchanged
14275.8	-0.258574	0.092051	-2.80903	0.00496912	0.148689	ENSG00000169223	0.82772	unchanged
10.443	3.94237	1.40355	2.80885	0.00497186	0.148689	ENSG00000260555	0.82772	unchanged
199.952	0.897138	0.319363	2.80915	0.00496723	0.148689	ENSG00000103154	0.82772	unchanged
5.79694	-4.70506	1.67621	-2.80697	0.00500096	0.149175	ENSG00000271868	0.826305	unchanged
3154.38	0.32866	0.117078	2.80718	0.00499768	0.149175	ENSG00000175567	0.826305	unchanged
672.319	-0.609064	0.216978	-2.80703	0.00500007	0.149175	ENSG00000111186	0.826305	unchanged
5774.44	-0.484663	0.172696	-2.80646	0.00500897	0.149285	ENSG00000080822	0.825983	unchanged
114.702	1.31201	0.467725	2.80508	0.00503046	0.149797	ENSG00000228232	0.824496	unchanged
1352.81	0.39218	0.139893	2.80343	0.00505622	0.150435	ENSG00000139517	0.82265	unchanged
9.20128	5.78782	2.06589	2.80162	0.00508475	0.151155	ENSG00000256008	0.820578	unchanged
5.76788	6.08407	2.17186	2.80131	0.00508954	0.151168	ENSG00000132185	0.82054	unchanged
78.0906	-1.50494	0.537447	-2.80016	0.00510773	0.151273	ENSG00000248810	0.82024	unchanged
14.4847	-4.9097	1.75347	-2.79999	0.00511047	0.151273	ENSG00000197558	0.82024	unchanged
2184.49	-0.477768	0.170619	-2.8002	0.00510712	0.151273	ENSG00000198535	0.82024	unchanged
1833.5	-0.329703	0.117723	-2.80066	0.00509974	0.151273	ENSG00000198768	0.82024	unchanged
13515.8	0.42494	0.151901	2.79749	0.00515017	0.152318	ENSG00000106261	0.817249	unchanged
71.2352	1.03196	0.368949	2.79703	0.0051574	0.152402	ENSG00000235560	0.817009	unchanged
2543.72	-0.363148	0.129962	-2.79426	0.0052018	0.153583	ENSG00000091947	0.813655	unchanged
3565.18	-0.262815	0.0941411	-2.79171	0.00524296	0.154526	ENSG00000175756	0.810998	unchanged
5844.6	0.308213	0.110424	2.79119	0.00525152	0.154526	ENSG00000145198	0.810998	unchanged
4353.02	-0.390209	0.139782	-2.79156	0.00524549	0.154526	ENSG00000167325	0.810998	unchanged
1636	0.350353	0.125511	2.79141	0.00524783	0.154526	ENSG00000122257	0.810998	unchanged
1942.92	0.344962	0.123621	2.79049	0.00526287	0.154729	ENSG00000176105	0.810427	unchanged
3017.52	0.321063	0.115076	2.79002	0.00527044	0.154821	ENSG00000187164	0.81017	unchanged
15.2558	-3.66418	1.31356	-2.78952	0.0052787	0.154932	ENSG00000173391	0.809858	unchanged
19536.2	-0.319683	0.114686	-2.78746	0.00531226	0.155786	ENSG00000182534	0.807471	unchanged
2148.41	0.278002	0.0997788	2.78618	0.00533331	0.156272	ENSG00000074603	0.80612	unchanged
1365.15	-0.366955	0.131725	-2.78577	0.00534005	0.156337	ENSG00000114279	0.805938	unchanged
4020.49	0.429	0.154014	2.78546	0.00534517	0.156355	ENSG00000140718	0.805887	unchanged
5.06989	-4.92702	1.76927	-2.78478	0.00535636	0.156551	ENSG00000286848	0.805345	unchanged
4292.97	-0.335991	0.120679	-2.78418	0.0053664	0.156712	ENSG00000155366	0.804897	unchanged
531.757	-0.973983	0.349924	-2.78341	0.00537906	0.15695	ENSG00000249992	0.804238	unchanged
12035.6	-0.416584	0.149767	-2.78154	0.00541012	0.157592	ENSG00000067064	0.802466	unchanged
39.9516	1.29423	0.46529	2.78156	0.0054099	0.157592	ENSG00000260339	0.802466	unchanged
6391.67	-0.244557	0.0880216	-2.77838	0.00546308	0.159001	ENSG00000137509	0.798599	unchanged
268.804	0.705399	0.254105	2.77601	0.005503	0.159512	ENSG00000116544	0.797207	unchanged
3644.13	-0.393853	0.141857	-2.77641	0.00549626	0.159512	ENSG00000084072	0.797207	unchanged
3195	0.367053	0.132215	2.77619	0.00550005	0.159512	ENSG00000152939	0.797207	unchanged
7318.29	-0.379453	0.136678	-2.77626	0.00549889	0.159512	ENSG00000138326	0.797207	unchanged
552.815	0.568811	0.204905	2.77598	0.00550358	0.159512	ENSG00000198182	0.797207	unchanged
13278.5	-0.220824	0.079561	-2.77553	0.00551113	0.159598	ENSG00000167778	0.796973	unchanged
4681.74	-0.381596	0.137522	-2.77481	0.00552337	0.159686	ENSG00000145425	0.796733	unchanged
4510.74	-0.422099	0.152103	-2.77508	0.00551884	0.159686	ENSG00000179271	0.796733	unchanged
1759.53	0.415686	0.149827	2.77444	0.00552961	0.159704	ENSG00000181381	0.796685	unchanged
2005.61	-0.374505	0.134994	-2.77423	0.00553318	0.159704	ENSG00000244187	0.796685	unchanged
5.34007	-5.27555	1.90221	-2.77339	0.00554759	0.159987	ENSG00000228862	0.795915	unchanged
24953.8	-0.398728	0.143812	-2.77256	0.00556167	0.160127	ENSG00000112695	0.795534	unchanged
17.5506	2.97953	1.07458	2.77273	0.00555882	0.160127	ENSG00000225647	0.795534	unchanged
3255.01	0.23919	0.0862949	2.77178	0.00557504	0.160379	ENSG00000075413	0.794851	unchanged
5462.65	-0.338945	0.122362	-2.77001	0.00560545	0.160694	ENSG00000055118	0.794	unchanged
6153.17	0.390488	0.140964	2.77013	0.00560338	0.160694	ENSG00000003989	0.794	unchanged
8906.57	-0.311317	0.112385	-2.77009	0.00560411	0.160694	ENSG00000165916	0.794	unchanged
4288.02	0.287353	0.103745	2.7698	0.0056091	0.160694	ENSG00000155629	0.794	unchanged
33701.5	-0.328341	0.118533	-2.77004	0.0056049	0.160694	ENSG00000118680	0.794	unchanged
9904.14	-0.356535	0.128769	-2.7688	0.00562634	0.161055	ENSG00000143198	0.793025	unchanged
8.68289	4.69961	1.69812	2.76753	0.00564832	0.161551	ENSG00000176510	0.791689	unchanged
1939.82	-0.263623	0.0952728	-2.76703	0.00565691	0.161664	ENSG00000109016	0.791387	unchanged
1690.95	0.462017	0.167001	2.76655	0.0056652	0.161768	ENSG00000075035	0.791108	unchanged
1554.4	-0.459905	0.166304	-2.76545	0.0056844	0.162183	ENSG00000070501	0.789996	unchanged
1001.02	-0.463813	0.167771	-2.76455	0.00570005	0.162496	ENSG00000115425	0.789157	unchanged
7617.42	-0.224031	0.0810686	-2.76348	0.00571887	0.162899	ENSG00000168701	0.788083	unchanged
6456.07	-0.235288	0.085165	-2.76272	0.00573211	0.163103	ENSG00000004059	0.787538	unchanged
6406.25	-0.405796	0.146893	-2.76254	0.00573543	0.163103	ENSG00000111639	0.787538	unchanged
21.4102	1.78411	0.646011	2.76174	0.00574944	0.163148	ENSG00000285646	0.787419	unchanged
1850.04	0.400325	0.144959	2.76165	0.00575108	0.163148	ENSG00000173575	0.787419	unchanged
3551.43	-0.344609	0.124765	-2.76207	0.0057437	0.163148	ENSG00000090013	0.787419	unchanged
782.438	0.549644	0.199066	2.76111	0.00576047	0.163281	ENSG00000147724	0.787065	unchanged
3538.79	0.359105	0.130157	2.75902	0.0057975	0.164196	ENSG00000198420	0.784637	unchanged
3782.59	-0.31693	0.114965	-2.75675	0.00583793	0.165207	ENSG00000109339	0.781972	unchanged
349.616	-0.603591	0.219008	-2.75602	0.00585096	0.165441	ENSG00000170955	0.781357	unchanged
5359.31	-0.393302	0.142734	-2.75548	0.00586052	0.165442	ENSG00000116212	0.781354	unchanged
15.4919	2.14364	0.777887	2.75573	0.00585619	0.165442	ENSG00000259248	0.781354	unchanged
2225.44	0.349597	0.126894	2.75503	0.00586876	0.16554	ENSG00000198894	0.781097	unchanged
1996.73	-0.463957	0.168456	-2.75418	0.00588394	0.165834	ENSG00000171202	0.780328	unchanged
4408.68	-0.377604	0.137216	-2.75189	0.00592517	0.166733	ENSG00000134375	0.777979	unchanged
10864.3	0.296773	0.107844	2.75188	0.00592544	0.166733	ENSG00000010322	0.777979	unchanged
1663.38	-0.440173	0.159972	-2.75157	0.00593098	0.166754	ENSG00000241837	0.777924	unchanged
11.3035	4.36951	1.59081	2.74672	0.0060194	0.169103	ENSG00000276085	0.771849	unchanged
112.534	1.05957	0.385833	2.74617	0.00602951	0.16925	ENSG00000141540	0.771471	unchanged
37.646	2.45886	0.895734	2.74508	0.00604965	0.169678	ENSG00000181215	0.770374	unchanged
4.61644	6.2415	2.27525	2.74321	0.00608422	0.170474	ENSG00000232907	0.768343	unchanged
9763.89	-0.389984	0.142173	-2.74301	0.00608782	0.170474	ENSG00000198258	0.768343	unchanged
18097.1	-0.26529	0.0967739	-2.74134	0.006119	0.170934	ENSG00000143774	0.767173	unchanged
3476.88	-0.403596	0.14722	-2.74146	0.00611671	0.170934	ENSG00000258289	0.767173	unchanged
308.22	0.889873	0.324611	2.74135	0.0061187	0.170934	ENSG00000171940	0.767173	unchanged
1296.37	-0.442369	0.161405	-2.74074	0.00613014	0.171107	ENSG00000163002	0.766732	unchanged
17483.7	-0.273408	0.0997784	-2.74015	0.00614117	0.171278	ENSG00000106153	0.766299	unchanged
3023.28	-0.384293	0.140268	-2.73972	0.00614923	0.171365	ENSG00000116962	0.766079	unchanged
1277	-0.339541	0.123948	-2.73938	0.00615544	0.1714	ENSG00000171311	0.765988	unchanged
3582.11	-0.265992	0.0971276	-2.73858	0.00617048	0.171682	ENSG00000170906	0.765276	unchanged
1713.75	-0.354241	0.129384	-2.7379	0.00618323	0.171899	ENSG00000139410	0.764728	unchanged
1674.34	-0.47689	0.174234	-2.73706	0.00619913	0.17193	ENSG00000169020	0.764648	unchanged
1161.78	-0.506474	0.185015	-2.73747	0.00619128	0.17193	ENSG00000198805	0.764648	unchanged
806.457	0.394065	0.143974	2.73705	0.0061992	0.17193	ENSG00000178502	0.764648	unchanged
521.249	0.4722	0.172594	2.73589	0.00622113	0.172401	ENSG00000291149	0.763461	unchanged
18077.6	-0.365847	0.133743	-2.73546	0.00622939	0.172492	ENSG00000168374	0.763231	unchanged
10569.8	-0.35489	0.129804	-2.73406	0.00625593	0.172965	ENSG00000120756	0.762041	unchanged
7462.68	-0.417925	0.152861	-2.73403	0.00625644	0.172965	ENSG00000182117	0.762041	unchanged
4339.43	-0.313406	0.114649	-2.73361	0.00626443	0.173049	ENSG00000159674	0.761832	unchanged
7483.13	-0.3718	0.136065	-2.73252	0.00628521	0.173485	ENSG00000143727	0.760739	unchanged
1241.94	0.503571	0.184318	2.73208	0.00629362	0.173502	ENSG00000131023	0.760695	unchanged
745.659	0.408938	0.149687	2.73196	0.00629583	0.173502	ENSG00000166783	0.760695	unchanged
5444.88	-0.235496	0.0862113	-2.73162	0.00630243	0.173546	ENSG00000173113	0.760584	unchanged
2444.93	0.315107	0.115393	2.73073	0.00631941	0.173876	ENSG00000178567	0.75976	unchanged
1701.84	0.33029	0.120989	2.72993	0.00633487	0.174164	ENSG00000132846	0.759042	unchanged
489.138	0.597077	0.218866	2.72804	0.00637114	0.175022	ENSG00000118707	0.756906	unchanged
1911.34	-0.38683	0.141816	-2.7277	0.00637784	0.175068	ENSG00000136682	0.756793	unchanged
322.246	0.870376	0.319122	2.72741	0.00638342	0.175083	ENSG00000079335	0.756756	unchanged
7944.32	-0.302633	0.110979	-2.72695	0.00639232	0.175189	ENSG00000120129	0.756493	unchanged
433.073	-0.634129	0.232684	-2.72527	0.0064248	0.17594	ENSG00000237880	0.754635	unchanged
16496.6	-0.206007	0.0756159	-2.72439	0.00644208	0.176275	ENSG00000088986	0.75381	unchanged
10026.3	-0.254199	0.0933469	-2.72316	0.00646606	0.176792	ENSG00000013306	0.752538	unchanged
28758.7	-0.293195	0.107711	-2.72205	0.00648777	0.177199	ENSG00000102144	0.751538	unchanged
13.9168	-3.92278	1.4412	-2.72188	0.00649118	0.177199	ENSG00000280381	0.751538	unchanged
2526.9	-0.40239	0.147893	-2.72082	0.0065121	0.177631	ENSG00000147400	0.750481	unchanged
44706.7	-0.222453	0.0817918	-2.71975	0.00653309	0.178064	ENSG00000166598	0.749424	unchanged
191.403	1.28139	0.471192	2.71946	0.00653891	0.178083	ENSG00000137491	0.749378	unchanged
54.012	-2.74642	1.0104	-2.71814	0.00656505	0.178655	ENSG00000125319	0.747986	unchanged
1951.42	-0.443126	0.163084	-2.71716	0.00658447	0.178903	ENSG00000170801	0.747383	unchanged
900.083	-0.505592	0.186057	-2.71741	0.0065796	0.178903	ENSG00000106080	0.747383	unchanged
153.494	-0.874735	0.322054	-2.71612	0.00660527	0.179328	ENSG00000136160	0.746352	unchanged
280.432	0.832923	0.306788	2.71498	0.00662802	0.179805	ENSG00000128604	0.745198	unchanged
4959.98	-0.384298	0.141563	-2.71467	0.00663424	0.179833	ENSG00000185721	0.74513	unchanged
987.784	0.488846	0.180103	2.71426	0.00664234	0.179913	ENSG00000079156	0.744938	unchanged
2501.14	-0.359011	0.132296	-2.7137	0.00665366	0.180079	ENSG00000039319	0.744537	unchanged
12520.3	0.230119	0.0848446	2.71225	0.00668288	0.180729	ENSG00000089737	0.742972	unchanged
8475.15	-0.379274	0.13986	-2.71182	0.00669151	0.180822	ENSG00000214253	0.74275	unchanged
1287.82	0.37083	0.136829	2.71018	0.00672476	0.181579	ENSG00000154328	0.740935	unchanged
9.89185	-4.11194	1.51799	-2.7088	0.00675263	0.181966	ENSG00000236497	0.74001	unchanged
1197.74	-0.457732	0.168986	-2.7087	0.00675479	0.181966	ENSG00000079257	0.74001	unchanged
2148.5	-0.442085	0.163187	-2.70907	0.00674712	0.181966	ENSG00000165716	0.74001	unchanged
2203.37	0.507106	0.18728	2.70774	0.00677434	0.182351	ENSG00000111696	0.739092	unchanged
84.2806	-1.07837	0.398514	-2.70597	0.00681047	0.182616	ENSG00000174899	0.738461	unchanged
5.70382	-4.66594	1.72368	-2.70696	0.00679023	0.182616	ENSG00000271781	0.738461	unchanged
1504.06	-0.452914	0.167357	-2.70627	0.00680439	0.182616	ENSG00000130150	0.738461	unchanged
76379.4	0.24431	0.0902825	2.70606	0.00680864	0.182616	ENSG00000139644	0.738461	unchanged
2701.1	0.437282	0.161572	2.70642	0.0068014	0.182616	ENSG00000172379	0.738461	unchanged
234.694	0.589228	0.217789	2.7055	0.00682014	0.182734	ENSG00000214575	0.73818	unchanged
2609.28	0.399208	0.147569	2.70522	0.00682585	0.182747	ENSG00000120008	0.73815	unchanged
591.133	0.518667	0.191937	2.70228	0.00688665	0.184233	ENSG00000183655	0.734634	unchanged
2244.58	0.46145	0.170796	2.70176	0.00689741	0.184378	ENSG00000073464	0.73429	unchanged
285.982	-0.79357	0.293807	-2.70099	0.00691338	0.184663	ENSG00000003096	0.733619	unchanged
406.724	-0.567845	0.210271	-2.70053	0.00692288	0.184775	ENSG00000167637	0.733357	unchanged
2403.82	0.342909	0.126999	2.70009	0.00693211	0.184879	ENSG00000130703	0.733112	unchanged
2375.45	-0.307621	0.113954	-2.69952	0.00694388	0.185051	ENSG00000179085	0.732708	unchanged
131.441	-0.971476	0.359943	-2.69897	0.00695547	0.185218	ENSG00000134668	0.732317	unchanged
1076.15	0.455644	0.168923	2.69735	0.00698942	0.185442	ENSG00000164080	0.731791	unchanged
967.497	-0.41668	0.154489	-2.69715	0.00699354	0.185442	ENSG00000150756	0.731791	unchanged
16316.3	0.291469	0.10807	2.69704	0.00699597	0.185442	ENSG00000124783	0.731791	unchanged
390.993	-0.600462	0.222604	-2.69745	0.00698738	0.185442	ENSG00000110169	0.731791	unchanged
5185.61	-0.355652	0.131834	-2.69772	0.00698156	0.185442	ENSG00000070404	0.731791	unchanged
1704.12	0.411991	0.152771	2.69678	0.00700125	0.185442	ENSG00000159873	0.731791	unchanged
1.15167e+06	-0.412215	0.152786	-2.698	0.00697584	0.185442	ENSG00000210082	0.731791	unchanged
179.042	-0.975058	0.36171	-2.69569	0.00702423	0.185909	ENSG00000093009	0.730699	unchanged
2372.41	0.308981	0.114657	2.69484	0.00704228	0.186245	ENSG00000116141	0.729915	unchanged
2229.43	-0.283728	0.105352	-2.69314	0.00707835	0.187057	ENSG00000148450	0.728027	unchanged
955.039	-0.493005	0.183235	-2.69056	0.00713318	0.188077	ENSG00000133048	0.725665	unchanged
1043.35	-0.4357	0.161911	-2.69099	0.00712401	0.188077	ENSG00000173114	0.725665	unchanged
832.325	-0.48369	0.179768	-2.69063	0.00713162	0.188077	ENSG00000119929	0.725665	unchanged
802.873	-0.425111	0.158035	-2.68998	0.00714569	0.188264	ENSG00000109113	0.725233	unchanged
5510.21	-0.308162	0.114578	-2.68953	0.00715525	0.188373	ENSG00000115221	0.724982	unchanged
15.8155	-3.5499	1.32017	-2.68897	0.00716723	0.188545	ENSG00000276476	0.724584	unchanged
7.54564	4.79258	1.78305	2.68786	0.0071911	0.18903	ENSG00000287709	0.723469	unchanged
814.692	-0.401501	0.149405	-2.68733	0.00720249	0.189186	ENSG00000163291	0.72311	unchanged
1083.34	-0.379716	0.141336	-2.68662	0.00721801	0.189451	ENSG00000253710	0.722503	unchanged
80.6642	-0.999491	0.3721	-2.68608	0.00722963	0.189613	ENSG00000225177	0.722133	unchanged
834.672	0.494375	0.184131	2.68492	0.00725482	0.19013	ENSG00000166405	0.72095	unchanged
10199.3	0.26416	0.098403	2.68447	0.00726448	0.19024	ENSG00000084652	0.720699	unchanged
3023.36	0.239101	0.0890905	2.6838	0.00727906	0.190478	ENSG00000237172	0.720156	unchanged
798.151	-0.495882	0.184836	-2.68282	0.00730032	0.190707	ENSG00000175048	0.719634	unchanged
4780.61	0.291505	0.108663	2.68264	0.00730427	0.190707	ENSG00000175662	0.719634	unchanged
9795.47	-0.211521	0.0788477	-2.68266	0.00730396	0.190707	ENSG00000142507	0.719634	unchanged
1167.01	-0.43759	0.163234	-2.68076	0.00734559	0.191641	ENSG00000100410	0.717511	unchanged
222.636	1.0204	0.380732	2.6801	0.00736008	0.191848	ENSG00000151640	0.717043	unchanged
1596.45	0.313975	0.117159	2.67989	0.00736453	0.191848	ENSG00000134453	0.717043	unchanged
56.3514	2.70284	1.00947	2.67748	0.00741775	0.193089	ENSG00000164076	0.714242	unchanged
4010.42	0.344671	0.128784	2.67636	0.00744278	0.193596	ENSG00000148175	0.713104	unchanged
705.088	0.625286	0.233805	2.67439	0.00748646	0.194586	ENSG00000197121	0.710888	unchanged
3800.66	-0.390739	0.146119	-2.67411	0.00749268	0.194602	ENSG00000072849	0.710852	unchanged
27423.6	-0.263817	0.0986961	-2.67302	0.00751709	0.195091	ENSG00000134333	0.709763	unchanged
1562.32	-0.377238	0.141151	-2.6726	0.00752668	0.195194	ENSG00000070269	0.709534	unchanged
3670.07	-0.338368	0.126622	-2.67228	0.00753387	0.195234	ENSG00000171530	0.709443	unchanged
1915.58	-0.390818	0.146363	-2.67019	0.00758079	0.196012	ENSG00000102309	0.707718	unchanged
1300.79	0.336137	0.125862	2.67069	0.00756965	0.196012	ENSG00000175893	0.707718	unchanged
6251.56	-0.309025	0.115721	-2.67043	0.0075755	0.196012	ENSG00000100348	0.707718	unchanged
13.5955	5.16529	1.9348	2.66968	0.00759228	0.196163	ENSG00000185760	0.707383	unchanged
1429.33	0.308905	0.115739	2.66899	0.00760801	0.196424	ENSG00000164929	0.706806	unchanged
576.006	0.485262	0.181836	2.66868	0.00761489	0.196455	ENSG00000174206	0.706737	unchanged
568.417	-0.514753	0.193009	-2.667	0.00765321	0.196714	ENSG00000186132	0.706166	unchanged
1162	0.383581	0.143822	2.66705	0.007652	0.196714	ENSG00000048991	0.706166	unchanged
795.891	-0.462087	0.173204	-2.66788	0.00763321	0.196714	ENSG00000152620	0.706166	unchanged
1281.6	0.405995	0.152195	2.6676	0.00763952	0.196714	ENSG00000186188	0.706166	unchanged
5775.63	-0.293591	0.110062	-2.66749	0.00764191	0.196714	ENSG00000089009	0.706166	unchanged
3537.62	0.285904	0.107218	2.66657	0.00766287	0.196816	ENSG00000161813	0.705939	unchanged
5034	-0.413241	0.15501	-2.66589	0.00767843	0.19707	ENSG00000178449	0.705379	unchanged
71.2644	2.08287	0.781504	2.66521	0.0076941	0.197327	ENSG00000133392	0.704814	unchanged
2485.41	0.429193	0.161088	2.66434	0.00771407	0.197693	ENSG00000124151	0.704009	unchanged
576.147	0.407049	0.152799	2.66395	0.00772281	0.197771	ENSG00000137764	0.703837	unchanged
997.014	0.394577	0.14816	2.66318	0.00774053	0.198079	ENSG00000103540	0.703162	unchanged
3823.98	-0.34803	0.130728	-2.66224	0.00776216	0.198486	ENSG00000168268	0.70227	unchanged
1575.25	0.470258	0.176694	2.66142	0.00778124	0.198558	ENSG00000091409	0.702113	unchanged
7.83288	4.9476	1.85904	2.66138	0.00778211	0.198558	ENSG00000062096	0.702113	unchanged
269.753	-0.72185	0.271191	-2.66177	0.007773	0.198558	ENSG00000256229	0.702113	unchanged
100.87	1.18653	0.446065	2.65999	0.00781427	0.199232	ENSG00000069122	0.70064	unchanged
17219.9	-0.326016	0.122576	-2.65969	0.00782117	0.199262	ENSG00000123562	0.700575	unchanged
4830.37	-0.314507	0.118271	-2.65919	0.00783279	0.19927	ENSG00000000003	0.700557	unchanged
16465.4	-0.311024	0.116962	-2.65919	0.00783296	0.19927	ENSG00000147604	0.700557	unchanged
6048.45	-0.260091	0.0978276	-2.65866	0.00784518	0.199435	ENSG00000141552	0.700198	unchanged
35536	-0.335178	0.126104	-2.65795	0.00786167	0.199708	ENSG00000117410	0.699604	unchanged
8019.05	0.402201	0.151361	2.65723	0.00787849	0.199989	ENSG00000132718	0.698993	unchanged
1148.64	-0.340129	0.128062	-2.65598	0.0079079	0.200589	ENSG00000008710	0.697692	unchanged
193.828	-0.78376	0.295215	-2.65488	0.00793365	0.201096	ENSG00000151012	0.696597	unchanged
1571.02	0.333721	0.125729	2.65429	0.0079476	0.201302	ENSG00000132623	0.696151	unchanged
409.576	-0.561759	0.211721	-2.65331	0.00797078	0.201743	ENSG00000113396	0.695203	unchanged
2157.18	0.345239	0.130162	2.65238	0.00799259	0.202147	ENSG00000181192	0.694332	unchanged
9.95735	3.35538	1.26539	2.65166	0.00800971	0.202433	ENSG00000261889	0.693718	unchanged
1015.96	0.614413	0.231776	2.6509	0.00802788	0.202643	ENSG00000108669	0.693268	unchanged
1237.13	-0.376682	0.1421	-2.65082	0.00802968	0.202643	ENSG00000167291	0.693268	unchanged
5532.05	-0.328602	0.124025	-2.64948	0.0080615	0.203181	ENSG00000172594	0.692116	unchanged
5035.43	-0.36102	0.136266	-2.64938	0.00806384	0.203181	ENSG00000188186	0.692116	unchanged
33.5249	-3.08762	1.1655	-2.64919	0.00806855	0.203181	ENSG00000177098	0.692116	unchanged
1380.03	0.483202	0.182416	2.64891	0.00807527	0.203203	ENSG00000169375	0.692069	unchanged
2906.13	0.272435	0.102949	2.64631	0.00813748	0.20462	ENSG00000135778	0.689051	unchanged
3318.52	-0.331734	0.125414	-2.64511	0.00816655	0.205055	ENSG00000122882	0.68813	unchanged
9447.64	0.261416	0.098827	2.64519	0.00816445	0.205055	ENSG00000071537	0.68813	unchanged
3468.66	0.437461	0.165467	2.6438	0.00819817	0.2057	ENSG00000134250	0.686766	unchanged
1462.75	-0.321861	0.121787	-2.64282	0.00822192	0.205999	ENSG00000149483	0.686136	unchanged
10985.7	-0.381097	0.144199	-2.64286	0.00822095	0.205999	ENSG00000065154	0.686136	unchanged
4244.06	0.307604	0.116411	2.64239	0.00823239	0.206112	ENSG00000067704	0.685896	unchanged
20159.3	-0.314083	0.118929	-2.64094	0.00826773	0.206551	ENSG00000163466	0.684974	unchanged
1040.6	-0.42104	0.159413	-2.64119	0.00826159	0.206551	ENSG00000139233	0.684974	unchanged
573.512	-0.510704	0.193363	-2.64118	0.00826188	0.206551	ENSG00000196466	0.684974	unchanged
397.8	-1.10329	0.418089	-2.63888	0.00831811	0.206636	ENSG00000127418	0.684794	unchanged
3392.97	0.334842	0.126832	2.64005	0.00828943	0.206636	ENSG00000119048	0.684794	unchanged
803.599	-0.421942	0.159814	-2.64021	0.0082855	0.206636	ENSG00000165868	0.684794	unchanged
7429.17	-0.338466	0.128228	-2.63958	0.008301	0.206636	ENSG00000111775	0.684794	unchanged
1442.86	0.34513	0.130781	2.63898	0.0083156	0.206636	ENSG00000140854	0.684794	unchanged
632.218	0.537013	0.203401	2.64017	0.00828647	0.206636	ENSG00000108510	0.684794	unchanged
1558.02	-0.460849	0.174587	-2.63966	0.00829895	0.206636	ENSG00000167920	0.684794	unchanged
2217.15	-0.293151	0.11109	-2.63885	0.00831871	0.206636	ENSG00000105281	0.684794	unchanged
714.798	-0.485792	0.184156	-2.63793	0.00834134	0.206702	ENSG00000152049	0.684654	unchanged
23.4352	2.87991	1.09199	2.63729	0.00835708	0.206702	ENSG00000145242	0.684654	unchanged
1416.6	-0.390205	0.147932	-2.63773	0.00834638	0.206702	ENSG00000250317	0.684654	unchanged
1649.8	0.345147	0.130866	2.63741	0.00835424	0.206702	ENSG00000130830	0.684654	unchanged
16037.8	-0.263387	0.0998261	-2.63846	0.00832832	0.206702	ENSG00000134910	0.684654	unchanged
1813	-0.316357	0.119933	-2.63778	0.00834497	0.206702	ENSG00000064961	0.684654	unchanged
40.2174	-1.48666	0.563867	-2.63655	0.00837547	0.206904	ENSG00000181291	0.68423	unchanged
398.792	0.632108	0.239755	2.63648	0.00837715	0.206904	ENSG00000223573	0.68423	unchanged
76.5905	-1.38989	0.527279	-2.63596	0.00839001	0.207075	ENSG00000138316	0.683873	unchanged
124.707	-1.24123	0.471485	-2.6326	0.0084733	0.208982	ENSG00000182870	0.679891	unchanged
2225.66	-0.361826	0.137511	-2.63125	0.00850719	0.209669	ENSG00000186468	0.678466	unchanged
2908.9	-0.368105	0.139933	-2.63058	0.00852384	0.209931	ENSG00000181610	0.677924	unchanged
10790.1	-0.357786	0.136078	-2.62926	0.00855697	0.210494	ENSG00000143575	0.67676	unchanged
2618.54	-0.376969	0.143378	-2.62919	0.00855884	0.210494	ENSG00000227877	0.67676	unchanged
317.006	0.754123	0.286951	2.62806	0.00858737	0.210897	ENSG00000155980	0.675929	unchanged
7565.85	-0.246668	0.0938533	-2.62823	0.00858304	0.210897	ENSG00000126267	0.675929	unchanged
647.209	-0.397395	0.151231	-2.62774	0.00859552	0.210948	ENSG00000099385	0.675824	unchanged
1240.37	0.511627	0.194785	2.62662	0.00862379	0.211493	ENSG00000148702	0.674705	unchanged
3290.35	0.336965	0.128379	2.62476	0.00867101	0.212351	ENSG00000076356	0.672946	unchanged
2272.64	-0.293431	0.111788	-2.62488	0.00866789	0.212351	ENSG00000141985	0.672946	unchanged
169.414	-0.816231	0.311132	-2.62342	0.00870509	0.212587	ENSG00000196581	0.672464	unchanged
1230.94	0.449239	0.171233	2.62356	0.0087016	0.212587	ENSG00000014919	0.672464	unchanged
4697.7	0.271992	0.103675	2.62352	0.00870257	0.212587	ENSG00000126218	0.672464	unchanged
538.699	-0.487338	0.185752	-2.62359	0.00870088	0.212587	ENSG00000174177	0.672464	unchanged
18.5621	3.52364	1.3433	2.62312	0.00871287	0.212627	ENSG00000250508	0.672382	unchanged
2404.73	0.31974	0.121924	2.62245	0.00873011	0.212898	ENSG00000158435	0.671828	unchanged
3115.03	0.363732	0.138743	2.62163	0.00875102	0.213109	ENSG00000204569	0.671398	unchanged
1642.88	-0.419757	0.160109	-2.6217	0.00874919	0.213109	ENSG00000108384	0.671398	unchanged
249.769	-0.74607	0.284642	-2.62109	0.00876504	0.213301	ENSG00000290043	0.671007	unchanged
132.186	0.792153	0.302304	2.62038	0.00878314	0.213592	ENSG00000146083	0.670415	unchanged
2574.17	-0.250631	0.0956617	-2.61997	0.00879373	0.213686	ENSG00000144747	0.670223	unchanged
17169.4	-0.375697	0.143409	-2.61975	0.00879932	0.213686	ENSG00000079689	0.670223	unchanged
1927.53	-0.372388	0.142187	-2.61901	0.0088186	0.213755	ENSG00000175581	0.670084	unchanged
1306.44	0.372359	0.142191	2.61873	0.00882568	0.213755	ENSG00000148429	0.670084	unchanged
32.0379	-1.42536	0.544303	-2.61869	0.00882674	0.213755	ENSG00000124116	0.670084	unchanged
790.239	-0.377896	0.144295	-2.61892	0.00882089	0.213755	ENSG00000187994	0.670084	unchanged
10358.4	0.253777	0.0969388	2.61791	0.00884712	0.214099	ENSG00000112308	0.669385	unchanged
1677.6	-0.293373	0.112085	-2.61741	0.00886	0.214113	ENSG00000176022	0.669358	unchanged
1286.96	0.387678	0.148103	2.61762	0.0088545	0.214113	ENSG00000173276	0.669358	unchanged
4043.98	0.212804	0.0813178	2.61694	0.00887218	0.214258	ENSG00000116747	0.669063	unchanged
79.9224	1.20293	0.459763	2.61642	0.00888559	0.214433	ENSG00000175344	0.668709	unchanged
8322.69	-0.314342	0.120196	-2.61525	0.00891612	0.21502	ENSG00000196230	0.667521	unchanged
11.7634	2.97313	1.13788	2.61286	0.00897869	0.215705	ENSG00000248485	0.66614	unchanged
496.334	-0.502251	0.192213	-2.61299	0.00897551	0.215705	ENSG00000249464	0.66614	unchanged
14155.1	0.429488	0.164377	2.61283	0.0089796	0.215705	ENSG00000019582	0.66614	unchanged
3567.33	-0.28966	0.110864	-2.61275	0.00898175	0.215705	ENSG00000079950	0.66614	unchanged
2917.11	0.341285	0.130596	2.61328	0.0089677	0.215705	ENSG00000103942	0.66614	unchanged
1332.09	-0.326306	0.124835	-2.61389	0.00895169	0.215705	ENSG00000167397	0.66614	unchanged
670.52	-0.515538	0.197437	-2.61115	0.00902381	0.216565	ENSG00000164296	0.664411	unchanged
2253.68	-0.260916	0.0999662	-2.61004	0.00905308	0.217118	ENSG00000162873	0.663305	unchanged
706.397	0.544587	0.208747	2.60883	0.00908516	0.217737	ENSG00000036672	0.662068	unchanged
835.585	-0.431183	0.165374	-2.60732	0.00912544	0.218551	ENSG00000198937	0.660447	unchanged
813.289	0.467875	0.17951	2.60639	0.00915011	0.218991	ENSG00000145819	0.659573	unchanged
609.068	0.580019	0.222682	2.60469	0.00919569	0.219475	ENSG00000011021	0.658615	unchanged
2793.95	-0.275401	0.105771	-2.60376	0.00922085	0.219475	ENSG00000169241	0.658615	unchanged
9302.68	-0.232342	0.0892018	-2.60468	0.00919599	0.219475	ENSG00000158864	0.658615	unchanged
671.682	-0.556105	0.213528	-2.60436	0.00920461	0.219475	ENSG00000123689	0.658615	unchanged
2035.92	-0.354156	0.13601	-2.60389	0.00921719	0.219475	ENSG00000177707	0.658615	unchanged
3.52866	-5.39106	2.06999	-2.60438	0.00920393	0.219475	ENSG00000272537	0.658615	unchanged
9073.15	-0.404201	0.155219	-2.60406	0.00921262	0.219475	ENSG00000196139	0.658615	unchanged
2218.58	-0.391358	0.150242	-2.60486	0.00919123	0.219475	ENSG00000123384	0.658615	unchanged
320.806	-0.599457	0.230263	-2.60336	0.00923157	0.21958	ENSG00000088766	0.658407	unchanged
139.431	1.82049	0.69959	2.60222	0.00926215	0.219886	ENSG00000234287	0.657803	unchanged
2179.83	-0.448044	0.17218	-2.60218	0.00926341	0.219886	ENSG00000238227	0.657803	unchanged
1585.76	-0.366612	0.140865	-2.60258	0.00925264	0.219886	ENSG00000172366	0.657803	unchanged
3682.89	-0.501674	0.192812	-2.60189	0.00927127	0.219922	ENSG00000163536	0.657731	unchanged
3073.12	0.22995	0.0883919	2.60148	0.00928234	0.220023	ENSG00000186197	0.657531	unchanged
634.787	0.550053	0.211456	2.60126	0.0092882	0.220023	ENSG00000135119	0.657531	unchanged
4331.39	-0.343696	0.132177	-2.60027	0.00931517	0.220062	ENSG00000144840	0.657455	unchanged
529.306	-0.612085	0.235378	-2.60043	0.00931061	0.220062	ENSG00000196549	0.657455	unchanged
969.422	-0.476414	0.183182	-2.60077	0.00930161	0.220062	ENSG00000146147	0.657455	unchanged
583.579	0.392916	0.151087	2.6006	0.00930606	0.220062	ENSG00000198440	0.657455	unchanged
162.869	1.0268	0.394949	2.59984	0.00932682	0.220188	ENSG00000186479	0.657207	unchanged
78.3907	1.08983	0.41929	2.59923	0.00934328	0.220381	ENSG00000129159	0.656825	unchanged
1303.8	0.384358	0.147883	2.59907	0.00934771	0.220381	ENSG00000290292	0.656825	unchanged
352.626	-0.531867	0.204671	-2.59864	0.0093594	0.220508	ENSG00000143061	0.656577	unchanged
2336.33	-0.466793	0.179667	-2.59811	0.00937397	0.220701	ENSG00000047457	0.656196	unchanged
34.5311	2.62693	1.01125	2.59771	0.00938477	0.220806	ENSG00000215068	0.655989	unchanged
3463	-0.390943	0.150593	-2.59603	0.0094309	0.221631	ENSG00000121022	0.654369	unchanged
4296.92	-0.291972	0.112472	-2.59596	0.0094326	0.221631	ENSG00000233927	0.654369	unchanged
42.0659	-1.98091	0.763367	-2.59496	0.00946022	0.22213	ENSG00000214212	0.653393	unchanged
1814.99	0.350155	0.13498	2.59412	0.00948327	0.222371	ENSG00000174151	0.652923	unchanged
1933.37	0.286585	0.110468	2.59427	0.00947925	0.222371	ENSG00000169925	0.652923	unchanged
1502.68	-0.454971	0.175429	-2.59347	0.00950131	0.222414	ENSG00000198157	0.652839	unchanged
35.9077	-2.3993	0.925171	-2.59336	0.00950431	0.222414	ENSG00000151490	0.652839	unchanged
1640.76	-0.395347	0.152433	-2.59357	0.0094985	0.222414	ENSG00000141378	0.652839	unchanged
2250.36	-0.421088	0.16254	-2.59068	0.00957865	0.223401	ENSG00000198918	0.650914	unchanged
5104.58	0.332793	0.128424	2.59137	0.0095595	0.223401	ENSG00000166908	0.650914	unchanged
615.811	-0.34299	0.132391	-2.59073	0.00957735	0.223401	ENSG00000103145	0.650914	unchanged
1656.65	-0.295207	0.113947	-2.59074	0.00957698	0.223401	ENSG00000189306	0.650914	unchanged
4594.34	-0.405599	0.15651	-2.59151	0.00955546	0.223401	ENSG00000185608	0.650914	unchanged
261.315	0.69433	0.26816	2.58924	0.00961883	0.224038	ENSG00000143603	0.649679	unchanged
5230.18	-0.324541	0.125332	-2.58946	0.00961276	0.224038	ENSG00000125968	0.649679	unchanged
2106.7	-0.375164	0.144909	-2.58896	0.00962668	0.22407	ENSG00000167779	0.649616	unchanged
803.947	-0.324793	0.125467	-2.58866	0.0096349	0.224111	ENSG00000053501	0.649536	unchanged
8642.33	-0.250169	0.0966678	-2.58792	0.00965566	0.224142	ENSG00000116857	0.649476	unchanged
17.1689	3.32328	1.2846	2.58702	0.00968096	0.224142	ENSG00000174130	0.649476	unchanged
9114.09	-0.244328	0.0944215	-2.58763	0.00966381	0.224142	ENSG00000197858	0.649476	unchanged
2019.2	-0.373397	0.144336	-2.58701	0.00968139	0.224142	ENSG00000062038	0.649476	unchanged
15.8456	-4.35554	1.68307	-2.58785	0.00965773	0.224142	ENSG00000064195	0.649476	unchanged
195.501	-0.850608	0.328752	-2.58739	0.00967073	0.224142	ENSG00000101194	0.649476	unchanged
2700.82	-0.307766	0.118951	-2.58734	0.00967214	0.224142	ENSG00000090372	0.649476	unchanged
592.457	0.598004	0.231215	2.58635	0.00969987	0.224421	ENSG00000154743	0.648937	unchanged
6.52642	-6.34046	2.45235	-2.58546	0.00972484	0.224849	ENSG00000082126	0.648109	unchanged
21413.6	-0.192704	0.0745752	-2.58402	0.00976569	0.225049	ENSG00000120306	0.647722	unchanged
1565.94	0.27464	0.106248	2.58489	0.00974091	0.225049	ENSG00000166526	0.647722	unchanged
217.602	-0.616668	0.238614	-2.58438	0.00975555	0.225049	ENSG00000087884	0.647722	unchanged
4573.35	0.26914	0.104134	2.58457	0.00975004	0.225049	ENSG00000165650	0.647722	unchanged
2004.7	-0.331119	0.128142	-2.58401	0.00976589	0.225049	ENSG00000105676	0.647722	unchanged
3816.01	-0.311508	0.120676	-2.58136	0.0098412	0.226635	ENSG00000167515	0.644674	unchanged
3843.25	-0.354522	0.13745	-2.57927	0.00990081	0.227856	ENSG00000180776	0.642339	unchanged
1481.91	0.279588	0.108438	2.57831	0.00992838	0.227887	ENSG00000011523	0.64228	unchanged
9480.9	-0.359126	0.139279	-2.57846	0.00992428	0.227887	ENSG00000173915	0.64228	unchanged
65.529	-1.40429	0.54461	-2.57853	0.00992204	0.227887	ENSG00000256870	0.64228	unchanged
63.7466	-1.53425	0.594904	-2.57898	0.00990929	0.227887	ENSG00000258793	0.64228	unchanged
23.9499	2.84364	1.10305	2.57799	0.00993779	0.227953	ENSG00000220008	0.642155	unchanged
111.269	-1.01469	0.393638	-2.57773	0.00994531	0.227975	ENSG00000078295	0.642114	unchanged
450.059	-0.540515	0.209727	-2.57723	0.00995966	0.228003	ENSG00000145335	0.64206	unchanged
502.399	0.627447	0.243457	2.57724	0.00995939	0.228003	ENSG00000100285	0.64206	unchanged
625.039	-0.403506	0.156657	-2.57573	0.0100029	0.228841	ENSG00000183137	0.640466	unchanged
25.0553	-1.94858	0.75671	-2.57507	0.0100219	0.229125	ENSG00000249207	0.639928	unchanged
6.79905	-5.28611	2.05365	-2.57401	0.0100528	0.229681	ENSG00000224751	0.638876	unchanged
3518.13	0.299885	0.116544	2.57314	0.0100779	0.230104	ENSG00000103479	0.638075	unchanged
1286.69	-0.485169	0.188622	-2.57217	0.0101064	0.230602	ENSG00000145287	0.637137	unchanged
117.394	0.892712	0.347414	2.56959	0.0101818	0.232061	ENSG00000178233	0.634397	unchanged
2007.69	-0.376237	0.146423	-2.56953	0.0101837	0.232061	ENSG00000123415	0.634397	unchanged
2245.13	0.375486	0.146244	2.56753	0.0102425	0.233047	ENSG00000121440	0.632557	unchanged
5708.89	-0.379807	0.147942	-2.56726	0.0102506	0.233047	ENSG00000163938	0.632557	unchanged
1232.81	0.349761	0.136257	2.56693	0.0102605	0.233047	ENSG00000146842	0.632557	unchanged
3289.54	-0.291837	0.113657	-2.5677	0.0102376	0.233047	ENSG00000183751	0.632557	unchanged
15.0909	4.59232	1.7889	2.56712	0.0102548	0.233047	ENSG00000149596	0.632557	unchanged
4151.73	0.323633	0.126124	2.56598	0.0102884	0.233223	ENSG00000143344	0.632228	unchanged
1149.33	-0.410409	0.159937	-2.56607	0.0102857	0.233223	ENSG00000168569	0.632228	unchanged
3072.97	0.270439	0.105379	2.56636	0.0102772	0.233223	ENSG00000100485	0.632228	unchanged
11.2101	-4.09265	1.59514	-2.5657	0.0102967	0.233261	ENSG00000171431	0.632158	unchanged
19.5004	3.00328	1.17075	2.56525	0.01031	0.233409	ENSG00000288719	0.631882	unchanged
1681.76	-0.293557	0.114519	-2.56339	0.0103656	0.234516	ENSG00000052749	0.629828	unchanged
159.535	-0.84009	0.3278	-2.56281	0.0103829	0.234754	ENSG00000102755	0.629388	unchanged
44.0781	1.97628	0.771645	2.56113	0.0104332	0.235689	ENSG00000128683	0.627661	unchanged
875.52	0.361203	0.141041	2.56098	0.0104378	0.235689	ENSG00000179761	0.627661	unchanged
6695.43	-0.276488	0.107973	-2.56071	0.0104459	0.235718	ENSG00000162517	0.627606	unchanged
1632.96	-0.462523	0.180716	-2.55939	0.0104855	0.236459	ENSG00000140092	0.626244	unchanged
3709.87	0.331654	0.129596	2.55914	0.010493	0.236474	ENSG00000082438	0.626217	unchanged
1866.28	0.400564	0.156624	2.55748	0.0105433	0.237454	ENSG00000099308	0.624421	unchanged
142.023	-0.731099	0.286112	-2.55529	0.0106101	0.238802	ENSG00000279483	0.621962	unchanged
3252.24	0.253211	0.0991038	2.55501	0.0106185	0.238837	ENSG00000147642	0.621898	unchanged
115.696	-1.18231	0.462815	-2.55461	0.0106306	0.238954	ENSG00000123500	0.621686	unchanged
3210.19	0.390691	0.15297	2.55404	0.0106481	0.239039	ENSG00000111110	0.621531	unchanged
1780.45	-0.318512	0.124699	-2.55424	0.0106419	0.239039	ENSG00000168591	0.621531	unchanged
14.074	-4.67335	1.82996	-2.5538	0.0106555	0.23905	ENSG00000138829	0.621511	unchanged
370.888	0.604546	0.236777	2.55323	0.0106728	0.23913	ENSG00000128917	0.621366	unchanged
18809.1	-0.366107	0.143387	-2.55328	0.0106713	0.23913	ENSG00000170540	0.621366	unchanged
1340.35	0.308489	0.120842	2.55282	0.0106856	0.239263	ENSG00000164329	0.621125	unchanged
8.20936	-3.02438	1.18533	-2.55151	0.0107257	0.239696	ENSG00000251359	0.620339	unchanged
7251.96	-0.392782	0.153917	-2.5519	0.0107136	0.239696	ENSG00000102181	0.620339	unchanged
321.265	0.733432	0.287428	2.5517	0.0107197	0.239696	ENSG00000223959	0.620339	unchanged
7405.85	0.299707	0.11749	2.5509	0.0107445	0.239963	ENSG00000146433	0.619857	unchanged
81.2248	0.943378	0.369919	2.55023	0.0107651	0.240134	ENSG00000287966	0.619547	unchanged
293.094	-0.719204	0.282018	-2.5502	0.010766	0.240134	ENSG00000182575	0.619547	unchanged
7571.4	-0.338779	0.132869	-2.54972	0.010781	0.240315	ENSG00000138722	0.619219	unchanged
1569.02	-0.488981	0.191807	-2.54933	0.0107929	0.240425	ENSG00000143156	0.61902	unchanged
710.831	-0.393618	0.154444	-2.54861	0.0108153	0.240733	ENSG00000114735	0.618464	unchanged
806.382	-0.338709	0.132908	-2.54844	0.0108206	0.240733	ENSG00000100417	0.618464	unchanged
44.9381	1.40722	0.552333	2.54778	0.0108411	0.241037	ENSG00000267064	0.617917	unchanged
3946.91	-0.30278	0.118871	-2.54713	0.0108612	0.241274	ENSG00000117143	0.61749	unchanged
9.052	2.93694	1.1531	2.54699	0.0108657	0.241274	ENSG00000290689	0.61749	unchanged
608.984	0.480118	0.18854	2.5465	0.0108809	0.241304	ENSG00000187098	0.617436	unchanged
261.893	-0.937389	0.368105	-2.54652	0.0108802	0.241304	ENSG00000070601	0.617436	unchanged
601.016	0.600491	0.235897	2.54557	0.01091	0.241794	ENSG00000118058	0.616554	unchanged
2136.82	0.492464	0.193479	2.54531	0.0109182	0.241822	ENSG00000174306	0.616505	unchanged
30.1676	-3.08084	1.21085	-2.54437	0.0109474	0.242038	ENSG00000142661	0.616116	unchanged
1932.22	-0.315623	0.12405	-2.54433	0.0109489	0.242038	ENSG00000150540	0.616116	unchanged
4.30551	-5.85832	2.30232	-2.54453	0.0109424	0.242038	ENSG00000233110	0.616116	unchanged
2039.69	-0.335487	0.131894	-2.5436	0.0109716	0.242079	ENSG00000188010	0.616043	unchanged
1781.99	-0.393877	0.154841	-2.54375	0.0109668	0.242079	ENSG00000187049	0.616043	unchanged
514.792	0.400028	0.157256	2.54381	0.0109651	0.242079	ENSG00000275023	0.616043	unchanged
2856.12	-0.411776	0.161959	-2.54246	0.0110074	0.242407	ENSG00000139192	0.615455	unchanged
2811.93	0.279784	0.110035	2.54268	0.0110006	0.242407	ENSG00000108395	0.615455	unchanged
4904.67	-0.230058	0.0904835	-2.54254	0.0110051	0.242407	ENSG00000126457	0.615455	unchanged
1364.58	0.400574	0.157596	2.54178	0.0110289	0.242726	ENSG00000100105	0.614884	unchanged
18.3049	4.71378	1.8548	2.5414	0.011041	0.242839	ENSG00000290727	0.614682	unchanged
1530.1	-0.330216	0.129978	-2.54055	0.0110679	0.243278	ENSG00000155254	0.613898	unchanged
4018.13	-0.365956	0.144144	-2.53882	0.0111226	0.244071	ENSG00000042493	0.612484	unchanged
37.5913	-1.27034	0.500307	-2.53911	0.0111133	0.244071	ENSG00000260071	0.612484	unchanged
2052.16	-0.258428	0.101794	-2.53874	0.0111251	0.244071	ENSG00000133265	0.612484	unchanged
5707.75	0.408697	0.161039	2.53787	0.0111528	0.244525	ENSG00000241973	0.611677	unchanged
220.001	0.811021	0.319626	2.53741	0.0111676	0.244695	ENSG00000176641	0.611374	unchanged
30.2139	2.58875	1.02043	2.53691	0.0111837	0.244739	ENSG00000196338	0.611297	unchanged
641.256	0.478022	0.188425	2.53693	0.0111829	0.244739	ENSG00000165312	0.611297	unchanged
853.502	-0.305764	0.120577	-2.53584	0.0112177	0.245072	ENSG00000159445	0.610707	unchanged
196.508	0.649868	0.25628	2.53577	0.0112201	0.245072	ENSG00000214870	0.610707	unchanged
1339.54	-0.349866	0.13797	-2.53582	0.0112183	0.245072	ENSG00000102547	0.610707	unchanged
4543.29	-0.402882	0.158897	-2.53549	0.0112289	0.24511	ENSG00000213619	0.610639	unchanged
254.237	0.527825	0.208306	2.53389	0.0112805	0.245549	ENSG00000113231	0.609863	unchanged
707.21	0.3804	0.150105	2.53423	0.0112694	0.245549	ENSG00000272391	0.609863	unchanged
9488.38	0.325516	0.12845	2.53418	0.0112712	0.245549	ENSG00000156298	0.609863	unchanged
3193.8	-0.303816	0.119907	-2.53377	0.0112843	0.245549	ENSG00000165813	0.609863	unchanged
7431.14	-0.372944	0.147185	-2.53384	0.0112819	0.245549	ENSG00000125691	0.609863	unchanged
27577.7	0.205131	0.0810097	2.53218	0.0113357	0.246512	ENSG00000108946	0.608162	unchanged
2729.27	0.350142	0.138307	2.53163	0.0113535	0.24659	ENSG00000156650	0.608024	unchanged
1634.29	-0.31425	0.12412	-2.53183	0.011347	0.24659	ENSG00000100263	0.608024	unchanged
3209.9	-0.328358	0.129727	-2.53115	0.0113689	0.246771	ENSG00000137210	0.607705	unchanged
17.7359	-3.90929	1.54488	-2.53049	0.0113904	0.246996	ENSG00000138653	0.60731	unchanged
495.412	-0.379435	0.149951	-2.53039	0.0113935	0.246996	ENSG00000133983	0.60731	unchanged
4288.04	0.328017	0.129673	2.52957	0.0114204	0.247425	ENSG00000169905	0.606557	unchanged
6915.79	-0.297919	0.117788	-2.52929	0.0114294	0.247467	ENSG00000130724	0.606483	unchanged
672.081	0.663118	0.262207	2.52899	0.0114391	0.247522	ENSG00000101605	0.606386	unchanged
81723.6	-0.348444	0.137843	-2.52784	0.0114766	0.247716	ENSG00000116209	0.606045	unchanged
122.61	-0.738077	0.291962	-2.52799	0.0114717	0.247716	ENSG00000258072	0.606045	unchanged
112.055	-1.03948	0.411148	-2.52823	0.011464	0.247716	ENSG00000133101	0.606045	unchanged
170.379	-0.715596	0.283043	-2.52823	0.011464	0.247716	ENSG00000136122	0.606045	unchanged
231.448	0.657483	0.260311	2.52576	0.0115449	0.249037	ENSG00000173209	0.603736	unchanged
35.6559	2.12496	0.841712	2.52457	0.0115839	0.249536	ENSG00000215246	0.602868	unchanged
17.6607	3.19757	1.26673	2.52427	0.011594	0.249536	ENSG00000165197	0.602868	unchanged
204.556	-0.62071	0.245917	-2.52406	0.0116008	0.249536	ENSG00000203780	0.602868	unchanged
4184.57	0.304862	0.120787	2.52396	0.011604	0.249536	ENSG00000080371	0.602868	unchanged
535.437	0.516184	0.204498	2.52415	0.011598	0.249536	ENSG00000138834	0.602868	unchanged
613.714	-0.594811	0.235735	-2.52322	0.0116287	0.249912	ENSG00000138134	0.602213	unchanged
1264.22	0.351232	0.139214	2.52297	0.0116367	0.249931	ENSG00000164151	0.602181	unchanged
647.799	0.419521	0.166319	2.52239	0.011656	0.250189	ENSG00000090905	0.601731	unchanged
2008.42	0.351731	0.139492	2.52152	0.0116849	0.250656	ENSG00000143493	0.600922	unchanged
6.04263	-4.41433	1.7517	-2.52002	0.0117347	0.251393	ENSG00000254467	0.599646	unchanged
48.9548	2.2905	0.90899	2.51983	0.011741	0.251393	ENSG00000132975	0.599646	unchanged
1256.1	0.354561	0.140707	2.51986	0.0117402	0.251393	ENSG00000171634	0.599646	unchanged
21780.9	-0.365871	0.145237	-2.51913	0.0117646	0.251434	ENSG00000014641	0.599576	unchanged
8430.9	-0.339832	0.134895	-2.51923	0.0117611	0.251434	ENSG00000143977	0.599576	unchanged
8514.24	-0.37125	0.147361	-2.51933	0.0117577	0.251434	ENSG00000165502	0.599576	unchanged
13.0296	3.92549	1.55847	2.51881	0.0117753	0.251478	ENSG00000188257	0.599499	unchanged
3832.94	0.451529	0.179275	2.51863	0.0117811	0.251478	ENSG00000154856	0.599499	unchanged
175.006	-0.778779	0.309447	-2.51668	0.0118468	0.252568	ENSG00000135074	0.597621	unchanged
6173.63	-0.328089	0.130357	-2.51685	0.0118409	0.252568	ENSG00000132581	0.597621	unchanged
1647.86	0.38555	0.153225	2.51623	0.0118619	0.252582	ENSG00000165443	0.597597	unchanged
1181.54	-0.318486	0.126563	-2.51642	0.0118555	0.252582	ENSG00000141971	0.597597	unchanged
2613.4	-0.261722	0.104044	-2.51549	0.0118868	0.252663	ENSG00000162910	0.597459	unchanged
40.9668	-1.85144	0.736179	-2.51493	0.0119055	0.252663	ENSG00000214376	0.597459	unchanged
5665.29	-0.304581	0.121105	-2.51501	0.0119028	0.252663	ENSG00000265354	0.597459	unchanged
181.048	-0.737519	0.293197	-2.51544	0.0118885	0.252663	ENSG00000065675	0.597459	unchanged
2125.72	-0.349468	0.138963	-2.51482	0.0119093	0.252663	ENSG00000111361	0.597459	unchanged
1107.12	0.357283	0.142045	2.51527	0.011894	0.252663	ENSG00000176994	0.597459	unchanged
27515.7	-0.348402	0.138574	-2.51419	0.0119306	0.25296	ENSG00000140319	0.596948	unchanged
1133.2	-0.390885	0.155524	-2.51334	0.0119593	0.253161	ENSG00000074582	0.596603	unchanged
2755.76	-0.390604	0.155427	-2.51311	0.0119673	0.253161	ENSG00000173221	0.596603	unchanged
5848.62	-0.329109	0.13096	-2.51305	0.0119693	0.253161	ENSG00000104381	0.596603	unchanged
835.387	0.377417	0.150148	2.51363	0.0119497	0.253161	ENSG00000137502	0.596603	unchanged
770.519	-0.370887	0.147604	-2.51271	0.0119808	0.253251	ENSG00000185022	0.596449	unchanged
7851.8	2.39881	0.954833	2.51228	0.0119954	0.253406	ENSG00000172016	0.596183	unchanged
353.026	0.61428	0.244547	2.51191	0.0120078	0.253514	ENSG00000158555	0.595998	unchanged
8200.96	-0.22882	0.091161	-2.51006	0.012071	0.254055	ENSG00000128564	0.595072	unchanged
1694.62	-0.313184	0.124771	-2.51007	0.0120708	0.254055	ENSG00000106991	0.595072	unchanged
7368.81	-0.33854	0.134867	-2.51018	0.0120671	0.254055	ENSG00000106803	0.595072	unchanged
1581.46	0.344865	0.137403	2.50988	0.0120773	0.254055	ENSG00000133789	0.595072	unchanged
5039.2	-0.317535	0.126501	-2.51014	0.0120682	0.254055	ENSG00000111711	0.595072	unchanged
1632.44	-0.339835	0.13537	-2.51041	0.0120592	0.254055	ENSG00000161544	0.595072	unchanged
1587.15	0.395889	0.157773	2.50923	0.0120996	0.254216	ENSG00000197594	0.594796	unchanged
1178.61	0.516636	0.205885	2.50935	0.0120955	0.254216	ENSG00000137142	0.594796	unchanged
6925.16	-0.384053	0.15307	-2.509	0.0121073	0.254223	ENSG00000127922	0.594785	unchanged
621.497	-0.851601	0.339525	-2.50821	0.0121344	0.254638	ENSG00000102239	0.594076	unchanged
6520.37	-0.381161	0.151984	-2.5079	0.0121451	0.254709	ENSG00000144827	0.593955	unchanged
20.3631	-1.88053	0.750005	-2.50736	0.0121638	0.254794	ENSG00000154263	0.593811	unchanged
517.587	0.71708	0.285985	2.5074	0.0121622	0.254794	ENSG00000169169	0.593811	unchanged
3735.79	0.23229	0.0926558	2.50702	0.0121754	0.254883	ENSG00000112701	0.593659	unchanged
792.613	-0.362764	0.144762	-2.50595	0.0122124	0.255427	ENSG00000051596	0.592734	unchanged
2315.88	-0.2758	0.110063	-2.50584	0.012216	0.255427	ENSG00000126756	0.592734	unchanged
15797.9	-0.261206	0.104258	-2.50538	0.0122319	0.255605	ENSG00000163527	0.592431	unchanged
1500.91	-0.300355	0.119926	-2.5045	0.0122623	0.256087	ENSG00000125652	0.591612	unchanged
2563.45	-0.2757	0.110104	-2.504	0.0122797	0.256295	ENSG00000109519	0.591259	unchanged
365.099	-0.531717	0.212416	-2.50319	0.0123081	0.256651	ENSG00000151917	0.590658	unchanged
5151.11	0.232385	0.0928395	2.50309	0.0123115	0.256651	ENSG00000067082	0.590658	unchanged
5196.85	0.367087	0.14668	2.50264	0.012327	0.25682	ENSG00000124201	0.590372	unchanged
127.204	1.40501	0.561651	2.50156	0.0123646	0.257295	ENSG00000154358	0.589568	unchanged
2577.9	-0.274403	0.109686	-2.50171	0.0123593	0.257295	ENSG00000115649	0.589568	unchanged
7.70042	4.68977	1.87612	2.49971	0.0124295	0.258336	ENSG00000288046	0.587815	unchanged
994.173	0.776846	0.310762	2.49981	0.012426	0.258336	ENSG00000066468	0.587815	unchanged
3456.8	-0.311201	0.124524	-2.49912	0.0124504	0.258615	ENSG00000076242	0.587346	unchanged
507.314	-0.379516	0.151913	-2.49824	0.0124811	0.258789	ENSG00000129596	0.587054	unchanged
5367.31	-0.265221	0.10616	-2.49832	0.0124782	0.258789	ENSG00000119977	0.587054	unchanged
5785	-0.220919	0.088423	-2.49843	0.0124744	0.258789	ENSG00000103502	0.587054	unchanged
503.6	-0.48909	0.195799	-2.49792	0.0124926	0.258873	ENSG00000161970	0.586913	unchanged
9565.56	-0.383996	0.153782	-2.49701	0.0125244	0.259378	ENSG00000110700	0.586067	unchanged
201.023	-0.649682	0.26021	-2.49676	0.0125334	0.259409	ENSG00000224081	0.586016	unchanged
7033.77	-0.348822	0.139751	-2.49602	0.0125595	0.259794	ENSG00000144867	0.585371	unchanged
82.2064	-4.09279	1.64077	-2.49443	0.012616	0.259927	ENSG00000115956	0.585149	unchanged
8247.32	-0.316464	0.126872	-2.49437	0.0126183	0.259927	ENSG00000113161	0.585149	unchanged
1055.92	0.431042	0.172737	2.49536	0.012583	0.259927	ENSG00000081818	0.585149	unchanged
57.6812	1.19547	0.479188	2.49478	0.0126035	0.259927	ENSG00000091128	0.585149	unchanged
12605.5	0.216825	0.0869092	2.49485	0.0126011	0.259927	ENSG00000133639	0.585149	unchanged
7.33729	-6.02126	2.41372	-2.4946	0.01261	0.259927	ENSG00000128482	0.585149	unchanged
2491.32	-0.287798	0.115326	-2.49551	0.0125775	0.259927	ENSG00000131462	0.585149	unchanged
10831.1	-0.253401	0.101606	-2.49396	0.0126327	0.260071	ENSG00000186480	0.584908	unchanged
5984.11	-0.303294	0.12166	-2.49296	0.0126683	0.260649	ENSG00000163636	0.583945	unchanged
2919.14	0.310677	0.124687	2.49165	0.0127151	0.261456	ENSG00000188994	0.582601	unchanged
1075.84	0.524569	0.210632	2.49046	0.0127578	0.262181	ENSG00000156030	0.581399	unchanged
12923.1	-0.296002	0.118877	-2.49	0.0127744	0.262366	ENSG00000144381	0.581093	unchanged
39.156	-1.93133	0.77571	-2.48976	0.0127829	0.262385	ENSG00000236841	0.58106	unchanged
3692.28	-0.461996	0.185588	-2.48937	0.0127971	0.262523	ENSG00000158042	0.580833	unchanged
2299.18	-0.389972	0.156674	-2.48907	0.0128079	0.262589	ENSG00000171421	0.580724	unchanged
1921.72	0.248857	0.100001	2.48855	0.0128264	0.262813	ENSG00000178498	0.580352	unchanged
6015.69	-0.380599	0.152987	-2.48779	0.0128541	0.263224	ENSG00000143106	0.579675	unchanged
619.051	0.820122	0.32972	2.48733	0.0128705	0.263405	ENSG00000100678	0.579376	unchanged
2786.45	0.291604	0.117251	2.48699	0.0128828	0.263502	ENSG00000162852	0.579217	unchanged
2097.53	-0.369869	0.148736	-2.48675	0.0128917	0.263512	ENSG00000166147	0.5792	unchanged
3366.24	-0.311271	0.125181	-2.48656	0.0128984	0.263512	ENSG00000054611	0.5792	unchanged
2469.19	0.227752	0.0916269	2.48565	0.0129315	0.263652	ENSG00000135968	0.578969	unchanged
17950.4	-0.338731	0.136296	-2.48526	0.0129457	0.263652	ENSG00000169567	0.578969	unchanged
192.119	0.918217	0.369427	2.48552	0.0129362	0.263652	ENSG00000077279	0.578969	unchanged
1033.12	-0.313043	0.125967	-2.48513	0.0129505	0.263652	ENSG00000157110	0.578969	unchanged
3255.99	-0.332354	0.133738	-2.48512	0.0129508	0.263652	ENSG00000184281	0.578969	unchanged
3319.76	-0.269745	0.108534	-2.48534	0.0129427	0.263652	ENSG00000086504	0.578969	unchanged
1118.18	-0.343979	0.138443	-2.48463	0.0129687	0.263862	ENSG00000139546	0.578623	unchanged
3920.63	-0.334082	0.134511	-2.48368	0.0130033	0.264412	ENSG00000174132	0.57772	unchanged
874.963	0.460162	0.185293	2.48344	0.0130121	0.264435	ENSG00000116731	0.577681	unchanged
8.51127	4.70291	1.89431	2.48265	0.0130409	0.264661	ENSG00000236098	0.57731	unchanged
420.166	0.413117	0.166402	2.48264	0.0130412	0.264661	ENSG00000162714	0.57731	unchanged
583.153	0.38954	0.156916	2.48247	0.0130473	0.264661	ENSG00000156232	0.57731	unchanged
3867.88	0.346425	0.139558	2.4823	0.0130537	0.264661	ENSG00000101266	0.57731	unchanged
1275.94	0.345872	0.139348	2.48208	0.0130617	0.264669	ENSG00000131791	0.577297	unchanged
3147.37	-0.358671	0.144544	-2.48139	0.013087	0.265026	ENSG00000197713	0.576711	unchanged
184.373	0.693512	0.279515	2.48112	0.0130969	0.265073	ENSG00000179859	0.576634	unchanged
3683.02	-0.392391	0.158179	-2.48069	0.013113	0.265245	ENSG00000167863	0.576354	unchanged
538.548	0.529444	0.213472	2.48016	0.0131324	0.265482	ENSG00000157106	0.575964	unchanged
3170.94	0.317956	0.128217	2.47982	0.013145	0.265499	ENSG00000136144	0.575936	unchanged
1478.84	0.431419	0.173979	2.47972	0.0131485	0.265499	ENSG00000140382	0.575936	unchanged
19.9287	-3.30493	1.33362	-2.47817	0.0132057	0.266224	ENSG00000228192	0.574752	unchanged
319.814	-0.64542	0.260501	-2.47762	0.0132263	0.266224	ENSG00000163032	0.574752	unchanged
240.636	0.798182	0.322116	2.47793	0.0132146	0.266224	ENSG00000138376	0.574752	unchanged
2762.93	0.338793	0.136748	2.47751	0.0132304	0.266224	ENSG00000139697	0.574752	unchanged
4038.31	-0.352295	0.142143	-2.47846	0.0131951	0.266224	ENSG00000108826	0.574752	unchanged
55.43	1.29035	0.520793	2.47767	0.0132245	0.266224	ENSG00000008441	0.574752	unchanged
4.01558	5.40101	2.18033	2.47715	0.0132438	0.266339	ENSG00000104901	0.574565	unchanged
621.395	-0.465174	0.187861	-2.47616	0.0132802	0.266764	ENSG00000165269	0.573873	unchanged
15.6518	2.07124	0.836444	2.47625	0.0132772	0.266764	ENSG00000188375	0.573873	unchanged
2847.67	0.300559	0.121413	2.4755	0.0133049	0.266951	ENSG00000153395	0.573569	unchanged
571.32	-0.549013	0.221766	-2.47564	0.0132996	0.266951	ENSG00000248008	0.573569	unchanged
598.544	0.41085	0.165985	2.47523	0.0133151	0.267002	ENSG00000173302	0.573486	unchanged
625.767	-0.590213	0.238518	-2.4745	0.0133423	0.267268	ENSG00000043514	0.573052	unchanged
498.198	-0.500558	0.20229	-2.47446	0.0133438	0.267268	ENSG00000126749	0.573052	unchanged
2453.52	-0.310405	0.125455	-2.47423	0.0133522	0.267283	ENSG00000116863	0.573028	unchanged
1075.12	0.405949	0.164122	2.47346	0.0133813	0.267711	ENSG00000079819	0.572335	unchanged
62.5655	1.1167	0.451588	2.47283	0.0134047	0.26787	ENSG00000164867	0.572075	unchanged
895.906	-0.529322	0.214052	-2.47286	0.0134036	0.26787	ENSG00000176624	0.572075	unchanged
17786.7	0.262267	0.106085	2.47223	0.0134272	0.268011	ENSG00000145920	0.571847	unchanged
6017.51	0.313185	0.126674	2.47238	0.0134217	0.268011	ENSG00000057294	0.571847	unchanged
4972.02	-0.227242	0.0919387	-2.47167	0.0134482	0.268277	ENSG00000051620	0.571416	unchanged
10269.4	-0.253994	0.102822	-2.47022	0.013503	0.269062	ENSG00000111229	0.570148	unchanged
5191.16	0.315344	0.127658	2.47023	0.0135027	0.269062	ENSG00000104870	0.570148	unchanged
854.86	-0.402842	0.163222	-2.46806	0.0135848	0.270201	ENSG00000163331	0.568313	unchanged
5050.55	-0.378351	0.153295	-2.46813	0.0135822	0.270201	ENSG00000113643	0.568313	unchanged
14162.9	0.3235	0.131089	2.46779	0.0135949	0.270201	ENSG00000145632	0.568313	unchanged
761.104	-0.39736	0.161016	-2.46784	0.0135932	0.270201	ENSG00000102805	0.568313	unchanged
3770.67	0.318872	0.129219	2.46768	0.0135991	0.270201	ENSG00000197971	0.568313	unchanged
16.321	3.53605	1.43341	2.46688	0.0136297	0.270346	ENSG00000115616	0.568081	unchanged
19.2648	2.77401	1.1244	2.4671	0.0136213	0.270346	ENSG00000106128	0.568081	unchanged
2877.52	-0.284008	0.115127	-2.46691	0.0136284	0.270346	ENSG00000246705	0.568081	unchanged
419.158	-0.437349	0.177336	-2.46621	0.0136551	0.270696	ENSG00000114473	0.567519	unchanged
701.171	-0.385299	0.156281	-2.46543	0.0136848	0.27101	ENSG00000119782	0.567015	unchanged
220.077	0.532965	0.216187	2.4653	0.01369	0.27101	ENSG00000163749	0.567015	unchanged
790.338	0.368006	0.149282	2.46518	0.0136944	0.27101	ENSG00000121297	0.567015	unchanged
138.934	0.917236	0.372182	2.46448	0.0137212	0.271387	ENSG00000235961	0.566411	unchanged
4.46484	5.8371	2.36876	2.4642	0.013732	0.271445	ENSG00000260792	0.566318	unchanged
972.098	-0.442113	0.179448	-2.46374	0.0137496	0.271639	ENSG00000071655	0.566009	unchanged
3.4345	5.63536	2.28753	2.46351	0.0137584	0.271658	ENSG00000290554	0.565978	unchanged
1254.62	-0.383619	0.155735	-2.46328	0.0137673	0.27168	ENSG00000104299	0.565942	unchanged
208.818	-0.635684	0.25817	-2.46227	0.013806	0.272134	ENSG00000184227	0.565217	unchanged
238.59	-0.624656	0.253691	-2.46227	0.013806	0.272134	ENSG00000104983	0.565217	unchanged
30.0239	2.75077	1.11831	2.45975	0.0139034	0.273898	ENSG00000183091	0.562412	unchanged
6.37744	-4.74147	1.92783	-2.45949	0.0139136	0.273943	ENSG00000229335	0.562339	unchanged
1674.4	0.375118	0.15257	2.45865	0.0139459	0.274191	ENSG00000154767	0.561947	unchanged
3457.24	-0.298716	0.121501	-2.45855	0.0139498	0.274191	ENSG00000136270	0.561947	unchanged
1131.66	0.37667	0.153184	2.45893	0.0139352	0.274191	ENSG00000167244	0.561947	unchanged
80.5148	-1.01767	0.414063	-2.45777	0.0139802	0.274632	ENSG00000260265	0.561248	unchanged
7734.19	-0.201125	0.0818742	-2.45651	0.0140293	0.275441	ENSG00000188229	0.559971	unchanged
10.3552	-2.74205	1.11643	-2.45607	0.0140464	0.275586	ENSG00000241547	0.559743	unchanged
58.3342	-0.967107	0.393786	-2.45592	0.0140525	0.275586	ENSG00000109743	0.559743	unchanged
8039.99	-0.378925	0.154312	-2.45558	0.0140658	0.27569	ENSG00000182899	0.559578	unchanged
4949.61	-0.316732	0.129011	-2.45508	0.0140855	0.275921	ENSG00000003436	0.559215	unchanged
781.822	0.331564	0.135098	2.45425	0.0141178	0.276399	ENSG00000146587	0.558464	unchanged
606.245	-0.352874	0.14381	-2.45376	0.0141372	0.276478	ENSG00000106266	0.558339	unchanged
16587.7	-0.297945	0.121425	-2.45374	0.0141378	0.276478	ENSG00000103260	0.558339	unchanged
12824	-0.346892	0.141403	-2.45321	0.0141588	0.276578	ENSG00000161057	0.558182	unchanged
1535.15	0.28206	0.114971	2.45332	0.0141545	0.276578	ENSG00000141452	0.558182	unchanged
1434.56	0.302746	0.123423	2.45292	0.0141702	0.276645	ENSG00000108557	0.558077	unchanged
1316.16	0.370972	0.151278	2.45225	0.0141966	0.277006	ENSG00000148468	0.557511	unchanged
1954.3	-0.258767	0.105577	-2.45097	0.0142471	0.277672	ENSG00000114956	0.556469	unchanged
1191.77	-0.310976	0.126889	-2.45078	0.0142547	0.277672	ENSG00000196465	0.556469	unchanged
143.203	0.911872	0.372015	2.45117	0.0142392	0.277672	ENSG00000179598	0.556469	unchanged
2741.54	-0.22831	0.093195	-2.44981	0.0142933	0.278111	ENSG00000170458	0.555781	unchanged
1114.89	-0.269601	0.110047	-2.44987	0.0142907	0.278111	ENSG00000100294	0.555781	unchanged
807.893	0.446545	0.182337	2.44901	0.0143251	0.278575	ENSG00000151623	0.555058	unchanged
3253.5	-0.31622	0.129166	-2.44817	0.0143586	0.27899	ENSG00000158850	0.554411	unchanged
1780.78	-0.390033	0.159323	-2.44807	0.0143626	0.27899	ENSG00000143256	0.554411	unchanged
83.7173	1.24932	0.510373	2.44785	0.0143712	0.279002	ENSG00000277142	0.554393	unchanged
9.16367	-4.07841	1.66646	-2.44734	0.0143914	0.279238	ENSG00000234043	0.554025	unchanged
573.633	0.48788	0.199494	2.44559	0.0144614	0.279894	ENSG00000127249	0.553006	unchanged
11516.8	-0.370442	0.15148	-2.44549	0.0144655	0.279894	ENSG00000118181	0.553006	unchanged
4736.95	0.265594	0.108571	2.44628	0.0144339	0.279894	ENSG00000114062	0.553006	unchanged
52.6528	1.3512	0.55251	2.44557	0.0144624	0.279894	ENSG00000162004	0.553006	unchanged
728.687	-0.389565	0.159268	-2.44597	0.0144463	0.279894	ENSG00000105404	0.553006	unchanged
4426.98	-0.354379	0.144932	-2.44514	0.0144794	0.280008	ENSG00000039123	0.55283	unchanged
222.722	0.606275	0.248037	2.44429	0.0145136	0.280514	ENSG00000044459	0.552046	unchanged
103.683	-1.05246	0.43064	-2.44394	0.014528	0.280635	ENSG00000272727	0.551858	unchanged
3843.46	0.226866	0.0928458	2.44347	0.0145467	0.28084	ENSG00000158669	0.551541	unchanged
456.03	-0.488167	0.199802	-2.44326	0.0145554	0.280851	ENSG00000176273	0.551523	unchanged
1570.55	0.500416	0.204884	2.44244	0.0145882	0.28133	ENSG00000132938	0.550785	unchanged
13865.1	0.271957	0.111376	2.44179	0.0146148	0.28153	ENSG00000145321	0.550476	unchanged
4.95134	-5.78225	2.36786	-2.44197	0.0146075	0.28153	ENSG00000146469	0.550476	unchanged
6657.67	-0.315853	0.129392	-2.44105	0.0146447	0.281793	ENSG00000136942	0.550069	unchanged
997.888	0.60746	0.248837	2.44119	0.0146388	0.281793	ENSG00000183486	0.550069	unchanged
13.6914	-3.05704	1.2525	-2.44075	0.0146566	0.281867	ENSG00000147606	0.549957	unchanged
1974.46	-0.354672	0.145351	-2.4401	0.0146831	0.282062	ENSG00000115226	0.549655	unchanged
2200.77	0.505228	0.207049	2.44014	0.0146815	0.282062	ENSG00000039537	0.549655	unchanged
4124.46	0.274045	0.112352	2.43917	0.0147209	0.282476	ENSG00000166111	0.549018	unchanged
17.0443	-2.1407	0.877575	-2.43933	0.0147144	0.282476	ENSG00000278716	0.549018	unchanged
681.866	0.684647	0.280727	2.43884	0.0147347	0.282586	ENSG00000176595	0.54885	unchanged
20.8387	-1.61829	0.663748	-2.43811	0.0147645	0.282971	ENSG00000136630	0.548258	unchanged
635.48	0.584725	0.239863	2.43774	0.0147792	0.282971	ENSG00000132357	0.548258	unchanged
1421.19	0.438749	0.179978	2.43779	0.0147772	0.282971	ENSG00000119596	0.548258	unchanged
39359.5	0.246645	0.101195	2.43732	0.0147967	0.283015	ENSG00000133872	0.548191	unchanged
6.94701	-5.05428	2.07373	-2.43729	0.0147978	0.283015	ENSG00000228141	0.548191	unchanged
4878.75	-0.302859	0.124299	-2.43655	0.0148283	0.283442	ENSG00000113845	0.547536	unchanged
1413.97	-0.241939	0.099319	-2.43598	0.0148514	0.283729	ENSG00000051009	0.547097	unchanged
166.532	0.851887	0.349747	2.43573	0.0148619	0.283773	ENSG00000168778	0.547029	unchanged
1796.61	0.305897	0.125606	2.43536	0.0148769	0.283904	ENSG00000104419	0.546829	unchanged
4304.95	-0.25926	0.106494	-2.4345	0.0149123	0.284285	ENSG00000174574	0.546246	unchanged
2809.3	-0.268987	0.110505	-2.43417	0.0149261	0.284285	ENSG00000119185	0.546246	unchanged
1272.27	0.304114	0.124954	2.43381	0.0149408	0.284285	ENSG00000163900	0.546246	unchanged
7844.07	-0.35638	0.146457	-2.43334	0.0149601	0.284285	ENSG00000138495	0.546246	unchanged
557.212	0.388086	0.159444	2.43399	0.0149333	0.284285	ENSG00000204599	0.546246	unchanged
1687.41	0.243174	0.099891	2.43439	0.0149167	0.284285	ENSG00000175467	0.546246	unchanged
937.646	-0.313859	0.128986	-2.43329	0.0149624	0.284285	ENSG00000242779	0.546246	unchanged
342.423	0.485685	0.19959	2.43341	0.0149572	0.284285	ENSG00000183570	0.546246	unchanged
4564.43	0.432597	0.177857	2.43228	0.0150042	0.284457	ENSG00000127483	0.545983	unchanged
969.037	0.309607	0.127277	2.43256	0.0149927	0.284457	ENSG00000181444	0.545983	unchanged
19.8003	2.79405	1.14865	2.43246	0.0149968	0.284457	ENSG00000254231	0.545983	unchanged
513.512	-0.427337	0.175679	-2.43249	0.0149955	0.284457	ENSG00000148841	0.545983	unchanged
1136.99	-0.419708	0.172649	-2.43099	0.0150576	0.285076	ENSG00000125945	0.545039	unchanged
1717.85	-0.24411	0.10042	-2.4309	0.0150614	0.285076	ENSG00000158792	0.545039	unchanged
13713.5	-0.282146	0.116066	-2.43092	0.0150606	0.285076	ENSG00000101182	0.545039	unchanged
2507.62	-0.311479	0.128159	-2.43041	0.0150818	0.285306	ENSG00000187634	0.544689	unchanged
1746.91	0.42593	0.175277	2.43004	0.0150973	0.285444	ENSG00000131018	0.544479	unchanged
2314.11	-0.313704	0.129113	-2.42967	0.0151124	0.285575	ENSG00000160570	0.54428	unchanged
389.897	0.691314	0.284591	2.42915	0.0151343	0.285832	ENSG00000168404	0.543889	unchanged
1606.55	-0.427001	0.175837	-2.4284	0.0151658	0.286272	ENSG00000175701	0.543222	unchanged
10376.2	-0.217587	0.0896541	-2.42696	0.0152261	0.287253	ENSG00000099341	0.541735	unchanged
696.976	0.401705	0.165545	2.42656	0.0152426	0.287409	ENSG00000184792	0.541499	unchanged
8730.95	-0.219393	0.0904261	-2.42622	0.0152571	0.287527	ENSG00000105677	0.541322	unchanged
81.3356	-1.29356	0.533272	-2.4257	0.0152788	0.287727	ENSG00000226453	0.54102	unchanged
909.351	0.354602	0.146193	2.42557	0.0152843	0.287727	ENSG00000273559	0.54102	unchanged
3346.63	-0.257287	0.106081	-2.42537	0.0152928	0.287732	ENSG00000057663	0.541011	unchanged
988.363	-0.317882	0.131128	-2.42421	0.0153416	0.288493	ENSG00000096968	0.539864	unchanged
263.099	-0.642853	0.265239	-2.42367	0.0153646	0.288769	ENSG00000179934	0.539449	unchanged
3609.6	-0.24322	0.100413	-2.42219	0.0154272	0.289789	ENSG00000188677	0.537918	unchanged
2360.52	0.334684	0.138227	2.42127	0.0154664	0.290369	ENSG00000110344	0.537049	unchanged
1656.37	-0.346803	0.143255	-2.42089	0.0154827	0.290518	ENSG00000173156	0.536827	unchanged
3672.81	-0.29637	0.122433	-2.42067	0.0154921	0.290538	ENSG00000198074	0.536798	unchanged
964.28	0.398125	0.164518	2.41995	0.0155227	0.290955	ENSG00000163577	0.536174	unchanged
485.422	-0.417994	0.172767	-2.41942	0.0155454	0.291181	ENSG00000070950	0.535837	unchanged
2745.98	-0.283864	0.117335	-2.41927	0.0155515	0.291181	ENSG00000171307	0.535837	unchanged
1115.59	-0.387071	0.16003	-2.41873	0.0155747	0.291457	ENSG00000101132	0.535426	unchanged
4314.59	0.256585	0.106118	2.41791	0.01561	0.291647	ENSG00000130340	0.535142	unchanged
637.759	-0.532088	0.220056	-2.41797	0.0156075	0.291647	ENSG00000141582	0.535142	unchanged
7.31506	3.91183	1.61777	2.41804	0.0156044	0.291647	ENSG00000284633	0.535142	unchanged
6.34783	3.99446	1.65315	2.41628	0.0156802	0.292801	ENSG00000286194	0.533428	unchanged
276.033	-0.673618	0.278813	-2.41602	0.0156913	0.29285	ENSG00000186446	0.533354	unchanged
4893.93	0.209748	0.0868485	2.4151	0.0157307	0.293429	ENSG00000181026	0.532496	unchanged
2362.24	0.39848	0.165044	2.41438	0.0157619	0.293695	ENSG00000143850	0.532104	unchanged
21.8344	-2.0819	0.862254	-2.41449	0.0157573	0.293695	ENSG00000164129	0.532104	unchanged
6874.51	-0.250512	0.103784	-2.41378	0.015788	0.293996	ENSG00000197756	0.531659	unchanged
9148.8	0.405033	0.167811	2.41362	0.0157949	0.293996	ENSG00000106927	0.531659	unchanged
939.988	-0.457572	0.189605	-2.41328	0.0158095	0.294109	ENSG00000100726	0.531491	unchanged
6436.84	0.202521	0.0839397	2.4127	0.015835	0.294425	ENSG00000159592	0.531025	unchanged
12.637	2.38815	0.990632	2.41074	0.0159203	0.295853	ENSG00000140675	0.528923	unchanged
10.5398	4.86816	2.02018	2.40977	0.0159628	0.296484	ENSG00000134830	0.527998	unchanged
1004.53	0.365674	0.151785	2.40915	0.0159896	0.296544	ENSG00000285967	0.527912	unchanged
16.1456	-1.90194	0.789466	-2.40914	0.01599	0.296544	ENSG00000226581	0.527912	unchanged
1235.14	-0.326806	0.135654	-2.40911	0.0159916	0.296544	ENSG00000047230	0.527912	unchanged
1354.84	0.349814	0.145244	2.40847	0.0160197	0.296763	ENSG00000109685	0.52759	unchanged
2360.97	0.287025	0.119174	2.40845	0.0160205	0.296763	ENSG00000135250	0.52759	unchanged
1132.06	-0.435474	0.180835	-2.40812	0.0160347	0.296869	ENSG00000111196	0.527435	unchanged
5562.69	-0.222888	0.0926244	-2.40636	0.0161123	0.297987	ENSG00000142937	0.525803	unchanged
9792.05	-0.303128	0.12596	-2.40654	0.0161043	0.297987	ENSG00000148834	0.525803	unchanged
765.619	-0.542515	0.225535	-2.40546	0.0161522	0.298566	ENSG00000255248	0.52496	unchanged
98.2558	0.711977	0.296043	2.40498	0.0161733	0.298798	ENSG00000196741	0.524622	unchanged
1760.26	0.274629	0.114221	2.40437	0.0162002	0.299136	ENSG00000129657	0.524131	unchanged
4245.93	-0.397815	0.165493	-2.40381	0.016225	0.299278	ENSG00000120533	0.523925	unchanged
21.9803	3.2098	1.3353	2.40381	0.0162251	0.299278	ENSG00000283403	0.523925	unchanged
1046.38	-0.296978	0.12357	-2.40332	0.0162472	0.299367	ENSG00000145979	0.523797	unchanged
53.357	-1.91451	0.796603	-2.40334	0.0162459	0.299367	ENSG00000166813	0.523797	unchanged
310.123	-0.700068	0.291321	-2.40308	0.0162578	0.299403	ENSG00000196357	0.523744	unchanged
404.599	0.464493	0.193397	2.40175	0.0163167	0.30033	ENSG00000186073	0.522401	unchanged
102.244	0.80648	0.335874	2.40114	0.0163441	0.300464	ENSG00000155657	0.522208	unchanged
660.979	-0.435741	0.181482	-2.40101	0.0163499	0.300464	ENSG00000174276	0.522208	unchanged
31728.1	-0.323104	0.134551	-2.40135	0.0163348	0.300464	ENSG00000166562	0.522208	unchanged
943.92	-0.543909	0.226573	-2.40059	0.0163687	0.300507	ENSG00000126822	0.522145	unchanged
10762.2	-0.246238	0.102575	-2.40057	0.0163696	0.300507	ENSG00000074842	0.522145	unchanged
3.24258	4.97465	2.07343	2.39923	0.0164295	0.30078	ENSG00000232678	0.521751	unchanged
3811.66	0.284815	0.118725	2.39895	0.0164421	0.30078	ENSG00000228794	0.521751	unchanged
4894.98	0.225436	0.0939494	2.39954	0.0164155	0.30078	ENSG00000120705	0.521751	unchanged
1800.68	-0.341354	0.142279	-2.39919	0.0164313	0.30078	ENSG00000095794	0.521751	unchanged
3919.61	0.213962	0.0891538	2.39992	0.0163987	0.30078	ENSG00000139726	0.521751	unchanged
1196.42	-0.344177	0.14345	-2.39927	0.0164277	0.30078	ENSG00000167967	0.521751	unchanged
9.3101	4.06272	1.69359	2.39889	0.0164451	0.30078	ENSG00000167080	0.521751	unchanged
443.682	-0.487429	0.203334	-2.39719	0.0165215	0.30186	ENSG00000224568	0.520194	unchanged
498.146	0.49863	0.208005	2.39721	0.0165206	0.30186	ENSG00000185219	0.520194	unchanged
1016.91	-0.651286	0.27189	-2.39541	0.016602	0.302703	ENSG00000118965	0.518984	unchanged
25.4032	1.82139	0.76037	2.3954	0.0166024	0.302703	ENSG00000163288	0.518984	unchanged
1087.44	0.410688	0.171409	2.39595	0.0165774	0.302703	ENSG00000215114	0.518984	unchanged
851.874	-0.389052	0.162409	-2.3955	0.0165975	0.302703	ENSG00000161677	0.518984	unchanged
941.322	0.388088	0.16208	2.39442	0.0166465	0.303347	ENSG00000144191	0.51806	unchanged
253.347	-0.582838	0.243445	-2.39412	0.0166601	0.303436	ENSG00000291006	0.517933	unchanged
1123.63	-0.367411	0.153482	-2.39384	0.016673	0.303511	ENSG00000104691	0.517826	unchanged
102.139	1.2343	0.515709	2.39341	0.0166927	0.303711	ENSG00000083307	0.517539	unchanged
534.956	0.441012	0.184298	2.39293	0.0167143	0.303829	ENSG00000198625	0.517371	unchanged
436.855	0.525322	0.219536	2.39288	0.0167167	0.303829	ENSG00000111224	0.517371	unchanged
2739.7	-0.283853	0.118655	-2.39225	0.0167454	0.304033	ENSG00000121578	0.517079	unchanged
2787.3	0.38039	0.158998	2.39241	0.0167381	0.304033	ENSG00000072501	0.517079	unchanged
2634.76	-0.388655	0.162505	-2.39165	0.0167728	0.304372	ENSG00000115380	0.516596	unchanged
3320.47	-0.317367	0.132763	-2.39048	0.0168262	0.305181	ENSG00000151632	0.515443	unchanged
5507.49	-0.300755	0.12585	-2.38978	0.0168584	0.305288	ENSG00000163683	0.515291	unchanged
8880.83	-0.245002	0.102519	-2.38983	0.0168563	0.305288	ENSG00000127948	0.515291	unchanged
1444.22	0.355553	0.148776	2.38986	0.0168549	0.305288	ENSG00000184602	0.515291	unchanged
1265.37	-0.374547	0.156757	-2.38935	0.0168783	0.305489	ENSG00000141526	0.515005	unchanged
641.394	-0.411194	0.172123	-2.38895	0.0168966	0.30566	ENSG00000257727	0.514761	unchanged
274.242	0.777365	0.32543	2.38873	0.0169065	0.30568	ENSG00000121903	0.514733	unchanged
7.03467	-4.71249	1.97315	-2.38831	0.016926	0.305874	ENSG00000165972	0.514458	unchanged
1211.49	0.29126	0.121979	2.38779	0.0169502	0.306151	ENSG00000124222	0.514064	unchanged
3223.54	0.311773	0.130597	2.3873	0.0169727	0.306399	ENSG00000185499	0.513712	unchanged
8742.38	-0.358625	0.150237	-2.38706	0.0169837	0.306438	ENSG00000134248	0.513657	unchanged
17494.7	-0.336277	0.140905	-2.38654	0.0170076	0.306648	ENSG00000143947	0.513359	unchanged
290.275	0.579873	0.242988	2.38643	0.017013	0.306648	ENSG00000235194	0.513359	unchanged
1539.44	0.265866	0.111452	2.38547	0.0170573	0.307287	ENSG00000100813	0.512455	unchanged
611.978	-0.657898	0.275817	-2.38527	0.0170666	0.307297	ENSG00000168398	0.512442	unchanged
3654.8	0.337941	0.141694	2.385	0.017079	0.30736	ENSG00000088888	0.512352	unchanged
1418.79	0.578016	0.242433	2.38423	0.0171147	0.307684	ENSG00000271601	0.511896	unchanged
1635.83	0.417743	0.175208	2.38427	0.0171131	0.307684	ENSG00000101109	0.511896	unchanged
478.556	-0.441291	0.185118	-2.38384	0.0171332	0.307858	ENSG00000154645	0.51165	unchanged
1976.35	-0.257929	0.10822	-2.38338	0.0171543	0.308077	ENSG00000224093	0.511341	unchanged
6.38735	4.69586	1.97052	2.38306	0.0171695	0.308143	ENSG00000228028	0.511248	unchanged
5645.43	-0.354952	0.148956	-2.38292	0.0171757	0.308143	ENSG00000114391	0.511248	unchanged
649.394	-0.355505	0.149224	-2.38235	0.0172023	0.30838	ENSG00000119986	0.510914	unchanged
3299.32	0.32393	0.135976	2.38226	0.0172067	0.30838	ENSG00000139990	0.510914	unchanged
1936.12	-0.216745	0.0910154	-2.38141	0.0172464	0.308774	ENSG00000146066	0.510359	unchanged
5553.27	-0.23656	0.0993309	-2.38154	0.0172405	0.308774	ENSG00000167193	0.510359	unchanged
2533.93	-0.249487	0.104795	-2.38072	0.0172788	0.309194	ENSG00000101464	0.509769	unchanged
49.3855	-2.22528	0.934875	-2.3803	0.0172986	0.309389	ENSG00000133710	0.509495	unchanged
1543.52	-0.656053	0.275814	-2.37861	0.0173782	0.310652	ENSG00000169862	0.507725	unchanged
706.04	-0.518675	0.218096	-2.3782	0.0173974	0.310677	ENSG00000169282	0.507691	unchanged
821.129	-0.453091	0.190513	-2.37826	0.0173945	0.310677	ENSG00000176386	0.507691	unchanged
1820.02	0.342469	0.144076	2.377	0.0174542	0.311532	ENSG00000110367	0.506497	unchanged
650.597	-0.506718	0.213193	-2.3768	0.0174634	0.311536	ENSG00000066379	0.506492	unchanged
4010.94	-0.193834	0.0815727	-2.37622	0.0174912	0.311711	ENSG00000137100	0.506248	unchanged
1374.96	-0.287491	0.120984	-2.37626	0.017489	0.311711	ENSG00000174807	0.506248	unchanged
1102.3	0.331741	0.139626	2.37592	0.017505	0.311798	ENSG00000131242	0.506127	unchanged
2410.08	0.311382	0.131079	2.37553	0.0175237	0.311971	ENSG00000064651	0.505886	unchanged
711.671	0.39396	0.165877	2.37501	0.0175487	0.312224	ENSG00000116273	0.505534	unchanged
165.315	0.662243	0.278856	2.37485	0.0175559	0.312224	ENSG00000144134	0.505534	unchanged
19810.3	-0.345585	0.145715	-2.37165	0.0177086	0.314779	ENSG00000070081	0.501994	unchanged
504.906	-0.480549	0.202753	-2.37012	0.0177824	0.315929	ENSG00000113327	0.500411	unchanged
7697.59	-0.247205	0.104321	-2.36967	0.0178039	0.316149	ENSG00000129925	0.500108	unchanged
6238.82	0.275982	0.116526	2.36842	0.0178642	0.317057	ENSG00000033800	0.498863	unchanged
5.49924	-3.5675	1.50685	-2.36752	0.0179077	0.317215	ENSG00000289153	0.498646	unchanged
32.4979	-2.25209	0.95123	-2.36755	0.0179061	0.317215	ENSG00000146013	0.498646	unchanged
1483.62	0.415699	0.175587	2.36748	0.0179096	0.317215	ENSG00000160588	0.498646	unchanged
12.5036	3.56229	1.50451	2.36774	0.017897	0.317215	ENSG00000140795	0.498646	unchanged
16269.1	-0.254892	0.107706	-2.36656	0.0179541	0.317841	ENSG00000034510	0.49779	unchanged
320.56	-0.580567	0.245345	-2.36633	0.0179656	0.317884	ENSG00000203760	0.497732	unchanged
206.954	-0.649909	0.274712	-2.36578	0.0179921	0.318191	ENSG00000138400	0.497313	unchanged
124.46	1.01161	0.427787	2.36475	0.0180423	0.318915	ENSG00000127129	0.496326	unchanged
365.43	-0.525978	0.222449	-2.36449	0.0180548	0.318974	ENSG00000139278	0.496245	unchanged
5246.9	-0.369833	0.156554	-2.36234	0.0181601	0.320671	ENSG00000172172	0.49394	unchanged
69.9196	2.01228	0.852195	2.36129	0.0182113	0.321085	ENSG00000021826	0.49338	unchanged
990.129	0.487011	0.206218	2.36163	0.0181949	0.321085	ENSG00000010282	0.49338	unchanged
16661.8	-0.188929	0.0800056	-2.36145	0.0182037	0.321085	ENSG00000149273	0.49338	unchanged
5.45845	5.57097	2.36071	2.35987	0.0182812	0.322155	ENSG00000287824	0.491936	unchanged
290.072	-0.765424	0.32438	-2.35965	0.0182921	0.322185	ENSG00000138160	0.491895	unchanged
5514.54	0.252889	0.107184	2.35939	0.0183051	0.322249	ENSG00000175224	0.491809	unchanged
189.929	-0.59418	0.251882	-2.35896	0.0183261	0.322455	ENSG00000108352	0.49153	unchanged
3386.28	-0.258252	0.109492	-2.35863	0.0183423	0.322578	ENSG00000187134	0.491365	unchanged
1059.9	-0.424751	0.180118	-2.35819	0.0183645	0.322804	ENSG00000091428	0.491061	unchanged
1069.77	0.444907	0.18874	2.35725	0.0184107	0.323126	ENSG00000162542	0.490629	unchanged
41.1214	1.91839	0.813816	2.35728	0.0184093	0.323126	ENSG00000260942	0.490629	unchanged
1475.58	-0.295777	0.125467	-2.3574	0.0184034	0.323126	ENSG00000111231	0.490629	unchanged
9.73504	-3.41168	1.44764	-2.35672	0.0184373	0.323276	ENSG00000226419	0.490426	unchanged
2163.75	-0.254791	0.108113	-2.35671	0.0184378	0.323276	ENSG00000120437	0.490426	unchanged
7207.14	-0.276402	0.117308	-2.35622	0.0184622	0.323377	ENSG00000012660	0.490291	unchanged
23.4355	2.18156	0.925847	2.35629	0.0184587	0.323377	ENSG00000213988	0.490291	unchanged
1654.6	-0.281828	0.119622	-2.35598	0.0184741	0.323422	ENSG00000012061	0.490231	unchanged
7804.19	-0.296313	0.125786	-2.3557	0.018488	0.323503	ENSG00000101166	0.490121	unchanged
5729.73	0.283182	0.120224	2.35544	0.0185006	0.323561	ENSG00000154556	0.490044	unchanged
52.9616	1.86727	0.793054	2.35454	0.0185459	0.324189	ENSG00000213860	0.489201	unchanged
22.0064	1.7337	0.736491	2.354	0.0185725	0.324412	ENSG00000145700	0.488903	unchanged
942.37	-0.327213	0.139009	-2.35391	0.0185773	0.324412	ENSG00000126460	0.488903	unchanged
350.36	-0.566	0.240526	-2.35318	0.0186138	0.324886	ENSG00000186272	0.488269	unchanged
1536.83	0.395511	0.168173	2.35182	0.018682	0.325913	ENSG00000101298	0.486898	unchanged
809.713	0.312647	0.132972	2.35123	0.0187116	0.32597	ENSG00000171497	0.486822	unchanged
6.70269	-4.50843	1.91751	-2.35119	0.0187134	0.32597	ENSG00000188037	0.486822	unchanged
8612.72	-0.269872	0.11477	-2.35142	0.0187019	0.32597	ENSG00000134824	0.486822	unchanged
762.205	0.52938	0.225252	2.35017	0.0187646	0.326207	ENSG00000117036	0.486506	unchanged
2444.83	-0.33472	0.142397	-2.35061	0.0187428	0.326207	ENSG00000162616	0.486506	unchanged
2146.46	-0.348438	0.148257	-2.35023	0.018762	0.326207	ENSG00000115840	0.486506	unchanged
2730.11	-0.281176	0.119625	-2.35049	0.018749	0.326207	ENSG00000107021	0.486506	unchanged
[truncated: 36,476 more rows]

## Sheet: shCHD3+CHD4 vs. Control
baseMean	log2FoldChange	lfcSE	stat	pvalue	padj	ensembl_gene_id	negLog10Padj	color
977.04	1.94413	0.207829	9.3545	8.39941e-21	3.061e-16	ENSG00000078081	15.5141	up
3.493	-32.0905	3.55106	-9.03687	1.61223e-19	1.46886e-15	ENSG00000029559	14.833	down
1.63397	39.1455	4.30326	9.09671	9.31092e-20	1.46886e-15	ENSG00000224172	14.833	up
10955.7	1.63692	0.181041	9.04167	1.54296e-19	1.46886e-15	ENSG00000157601	14.833	up
1.06189	38.8389	4.314	9.00298	2.19675e-19	1.60113e-15	ENSG00000290794	14.7956	up
1.20697	-38.6108	4.31183	-8.95461	3.40949e-19	1.77503e-15	ENSG00000169006	14.7508	down
0.857783	38.7489	4.31982	8.97003	2.9642e-19	1.77503e-15	ENSG00000165606	14.7508	up
2.44053	-38.3854	4.30452	-8.91746	4.77085e-19	2.1733e-15	ENSG00000287244	14.6629	down
0.96082	-38.4044	4.31488	-8.90045	5.56214e-19	2.25223e-15	ENSG00000267592	14.6474	down
15056.9	1.66533	0.188231	8.84727	8.96829e-19	3.20373e-15	ENSG00000187608	14.4943	up
2.04313	38.0807	4.30833	8.83886	9.67017e-19	3.20373e-15	ENSG00000285534	14.4943	up
0.8167	37.8842	4.31798	8.7736	1.73041e-18	5.25512e-15	ENSG00000245719	14.2794	up
0.712938	-37.8055	4.32174	-8.74777	2.17614e-18	6.1004e-15	ENSG00000255317	14.2146	down
0.931911	37.4817	4.31865	8.67903	3.99149e-18	8.55659e-15	ENSG00000237614	14.0677	up
0.86626	37.5681	4.31772	8.70091	3.29233e-18	8.55659e-15	ENSG00000281100	14.0677	up
1.13131	-37.5595	4.32623	-8.68181	3.89513e-18	8.55659e-15	ENSG00000288162	14.0677	down
6178.56	1.61057	0.18556	8.67951	3.97494e-18	8.55659e-15	ENSG00000111331	14.0677	up
1.07914	37.0336	4.31363	8.58525	9.06394e-18	1.83509e-14	ENSG00000171060	13.7363	up
2.21815	-36.8361	4.30482	-8.55696	1.15885e-17	2.22273e-14	ENSG00000253490	13.6531	down
0.981232	37.0513	4.33829	8.54054	1.33599e-17	2.43437e-14	ENSG00000265046	13.6136	up
0.906481	37.0169	4.33933	8.53056	1.45643e-17	2.52747e-14	ENSG00000243347	13.5973	up
0.757116	-36.8723	4.34051	-8.49493	1.98058e-17	3.2429e-14	ENSG00000169777	13.4891	down
0.726936	-36.8597	4.34098	-8.49111	2.04666e-17	3.2429e-14	ENSG00000174429	13.4891	down
0.640462	-36.612	4.33085	-8.45375	2.82091e-17	4.28343e-14	ENSG00000274678	13.3682	down
1.38844	36.211	4.3096	8.40241	4.37414e-17	6.37627e-14	ENSG00000260455	13.1954	up
1.20515	36.1606	4.3115	8.38703	4.98574e-17	6.98828e-14	ENSG00000205424	13.1556	up
0.550577	-36.0631	4.32853	-8.33148	7.98376e-17	1.03911e-13	ENSG00000248356	12.9833	down
0.550577	-36.0631	4.32853	-8.33148	7.98376e-17	1.03911e-13	ENSG00000258630	12.9833	down
1.2262	35.6714	4.32001	8.25725	1.49063e-16	1.87321e-13	ENSG00000180316	12.7274	up
0.809085	35.6135	4.31911	8.24556	1.64386e-16	1.99691e-13	ENSG00000282304	12.6996	up
0.553989	-35.601	4.32777	-8.22619	1.93268e-16	2.27202e-13	ENSG00000277948	12.6436	down
0.544321	35.5003	4.3333	8.19243	2.56012e-16	2.91557e-13	ENSG00000248456	12.5353	up
0.734663	35.3572	4.32008	8.18438	2.73704e-16	3.02261e-13	ENSG00000156886	12.5196	up
0.800609	35.3195	4.31843	8.17879	2.86706e-16	3.07307e-13	ENSG00000182000	12.5124	up
1.35972	35.2994	4.32539	8.16098	3.32324e-16	3.46025e-13	ENSG00000225649	12.4609	up
1.21312	-35.2095	4.32589	-8.13924	3.97782e-16	4.02677e-13	ENSG00000176970	12.395	down
0.698831	-34.0232	4.32459	-7.86738	3.6215e-15	3.56698e-12	ENSG00000065371	11.4477	down
0.635796	-33.9676	4.32559	-7.85271	4.07137e-15	3.80443e-12	ENSG00000234553	11.4197	down
0.635796	-33.9676	4.32559	-7.85271	4.07137e-15	3.80443e-12	ENSG00000256166	11.4197	down
1.69161	-33.8347	4.33638	-7.80252	6.06839e-15	5.52876e-12	ENSG00000142319	11.2574	down
0.535844	33.7271	4.34464	7.76293	8.29926e-15	7.37683e-12	ENSG00000250081	11.1321	up
0.549322	-33.2617	4.32662	-7.68768	1.49824e-14	1.30001e-11	ENSG00000256571	10.8861	down
1630.86	1.42737	0.186472	7.65464	1.93855e-14	1.64294e-11	ENSG00000130303	10.7844	up
1214.9	-0.996246	0.131658	-7.56693	3.82138e-14	3.16506e-11	ENSG00000116032	10.4996	unchanged
831.538	2.01551	0.274994	7.32928	2.31386e-13	1.87386e-10	ENSG00000137959	9.72726	up
16946.8	1.03273	0.143928	7.17531	7.21422e-13	5.71539e-10	ENSG00000115415	9.24295	up
5.00599	19.7615	2.75612	7.17004	7.49758e-13	5.8135e-10	ENSG00000235295	9.23556	up
1.47183	30.5968	4.30705	7.10391	1.21279e-12	9.20787e-10	ENSG00000288393	9.03584	up
1.59541	-30.4665	4.30402	-7.07862	1.45598e-12	1.08286e-09	ENSG00000235397	8.96543	down
1.28641	30.4788	4.31049	7.07083	1.54006e-12	1.12249e-09	ENSG00000154342	8.94982	up
1.38431	-30.4087	4.31801	-7.04231	1.89085e-12	1.35114e-09	ENSG00000238117	8.8693	down
1.72327	-29.7777	4.30847	-6.91145	4.79739e-12	3.36214e-09	ENSG00000229794	8.47338	down
1.83414	-29.3688	4.30758	-6.81792	9.23674e-12	6.35122e-09	ENSG00000269220	8.19714	down
1.06384	29.1867	4.31448	6.76482	1.33474e-11	8.84397e-09	ENSG00000272033	8.05335	up
1.6371	29.1557	4.30872	6.76666	1.31791e-11	8.84397e-09	ENSG00000006059	8.05335	up
1.09495	-29.1238	4.31265	-6.75312	1.44704e-11	9.25031e-09	ENSG00000220773	8.03384	down
1.63923	-29.0862	4.30867	-6.75061	1.47221e-11	9.25031e-09	ENSG00000106328	8.03384	down
1.06218	29.1287	4.31353	6.75287	1.44952e-11	9.25031e-09	ENSG00000281103	8.03384	up
1.06688	-29.0872	4.31385	-6.74275	1.55412e-11	9.59943e-09	ENSG00000243398	8.01775	down
0.98983	29.023	4.31523	6.72572	1.74727e-11	1.06126e-08	ENSG00000286379	7.97418	up
1.46705	28.9683	4.31207	6.71796	1.8429e-11	1.101e-08	ENSG00000105549	7.95821	up
0.981153	28.9095	4.31468	6.70028	2.08019e-11	1.22271e-08	ENSG00000223621	7.91268	up
1.01282	-28.8993	4.31493	-6.6975	2.1201e-11	1.2264e-08	ENSG00000243986	7.91137	down
1.88873	-28.7503	4.31074	-6.66946	2.56741e-11	1.41764e-08	ENSG00000162761	7.84843	down
1.06697	-28.7721	4.31334	-6.67049	2.54946e-11	1.41764e-08	ENSG00000273449	7.84843	down
1.06697	-28.7721	4.31334	-6.67049	2.54946e-11	1.41764e-08	ENSG00000217026	7.84843	down
0.945659	-28.7536	4.31479	-6.66397	2.66527e-11	1.44971e-08	ENSG00000196131	7.83872	down
1.27419	-28.6854	4.31177	-6.6528	2.87576e-11	1.5412e-08	ENSG00000276272	7.81214	down
4.31591	20.036	3.02062	6.63308	3.28743e-11	1.73629e-08	ENSG00000132874	7.76038	up
0.825094	28.6322	4.31944	6.62869	3.38688e-11	1.76326e-08	ENSG00000235700	7.75368	up
0.742019	28.4589	4.32095	6.58625	4.51068e-11	2.31525e-08	ENSG00000262543	7.6354	up
0.738687	-28.4434	4.32075	-6.58298	4.61102e-11	2.33388e-08	ENSG00000260382	7.63192	down
0.738604	-28.4295	4.32126	-6.57898	4.73676e-11	2.36468e-08	ENSG00000217527	7.62623	down
0.709244	-28.3729	4.32052	-6.56701	5.13345e-11	2.52809e-08	ENSG00000226324	7.59721	down
7387.91	1.47691	0.225405	6.55226	5.66743e-11	2.75384e-08	ENSG00000119917	7.56006	up
1.39524	-28.0614	4.30968	-6.51125	7.45277e-11	3.5737e-08	ENSG00000271993	7.44688	down
1.2367	28.0076	4.31154	6.49597	8.24995e-11	3.90458e-08	ENSG00000233420	7.40843	up
1.67738	-27.938	4.3057	-6.48861	8.66338e-11	4.04769e-08	ENSG00000164821	7.39279	down
0.654286	28.0358	4.32354	6.48446	8.90529e-11	4.05898e-08	ENSG00000248968	7.39158	up
1.40918	-28.0673	4.32846	-6.48437	8.91031e-11	4.05898e-08	ENSG00000235140	7.39158	down
0.719225	-28.0051	4.32477	-6.47552	9.44879e-11	4.25114e-08	ENSG00000233646	7.37149	down
1.14908	28.0291	4.33734	6.46227	1.03146e-10	4.57385e-08	ENSG00000181908	7.33972	up
1.31296	-28.091	4.34794	-6.46077	1.04171e-10	4.57385e-08	ENSG00000285955	7.33972	down
0.656639	-27.9282	4.32398	-6.45892	1.05454e-10	4.57509e-08	ENSG00000251203	7.3396	down
0.768979	27.9063	4.32918	6.44609	1.14769e-10	4.92062e-08	ENSG00000261003	7.30798	up
0.96063	-27.8189	4.31869	-6.44152	1.18279e-10	5.01216e-08	ENSG00000270377	7.29998	down
0.577283	27.8603	4.32758	6.43785	1.21176e-10	5.07589e-08	ENSG00000251138	7.29449	up
1.07947	-27.8992	4.33789	-6.43152	1.26335e-10	5.23185e-08	ENSG00000074771	7.28134	down
0.852568	27.8162	4.33935	6.41022	1.45312e-10	5.9501e-08	ENSG00000223754	7.22548	up
6.1246	-20.6932	3.23925	-6.38826	1.67784e-10	6.79396e-08	ENSG00000180251	7.16788	down
0.900682	27.5577	4.31933	6.38009	1.76981e-10	7.08762e-08	ENSG00000254401	7.1495	up
0.576811	27.6016	4.32883	6.37621	1.8152e-10	7.11304e-08	ENSG00000270149	7.14794	up
2100.63	-1.26195	0.197909	-6.37643	1.81269e-10	7.11304e-08	ENSG00000175868	7.14794	down
0.65484	27.5735	4.32599	6.37391	1.84274e-10	7.14416e-08	ENSG00000287488	7.14605	up
0.57459	-27.5667	4.32864	-6.36846	1.9094e-10	7.32465e-08	ENSG00000215973	7.13521	down
0.490576	27.5591	4.33174	6.36213	1.9897e-10	7.39903e-08	ENSG00000287581	7.13083	up
0.490576	27.5591	4.33174	6.36213	1.9897e-10	7.39903e-08	ENSG00000275046	7.13083	up
0.752244	-27.6181	4.34066	-6.36264	1.9831e-10	7.39903e-08	ENSG00000180818	7.13083	down
6.12384	-19.7547	3.10976	-6.35251	2.11834e-10	7.79784e-08	ENSG00000170374	7.10803	down
2.13368	-27.2932	4.30577	-6.33876	2.31621e-10	8.44098e-08	ENSG00000235683	7.07361	down
0.637093	-27.3646	4.32616	-6.32538	2.52615e-10	9.00607e-08	ENSG00000286994	7.04546	down
0.554961	-27.3647	4.32829	-6.3223	2.57703e-10	9.00607e-08	ENSG00000285231	7.04546	down
0.637093	-27.3646	4.32616	-6.32538	2.52615e-10	9.00607e-08	ENSG00000275467	7.04546	down
0.554961	-27.3647	4.32829	-6.3223	2.57703e-10	9.00607e-08	ENSG00000288605	7.04546	down
1.4097	-27.2265	4.30715	-6.32123	2.59484e-10	9.00607e-08	ENSG00000205784	7.04546	down
2.15654	-23.4029	3.70654	-6.31396	2.71979e-10	9.35068e-08	ENSG00000272046	7.02916	down
0.655691	-27.2955	4.32552	-6.31033	2.78437e-10	9.39544e-08	ENSG00000233924	7.02708	down
0.655691	-27.2955	4.32552	-6.31033	2.78437e-10	9.39544e-08	ENSG00000259258	7.02708	down
0.59446	27.3938	4.34305	6.30751	2.83562e-10	9.48061e-08	ENSG00000154646	7.02316	up
1.78186	-27.139	4.30989	-6.29691	3.0364e-10	1.00596e-07	ENSG00000143105	6.99742	down
997.888	1.55067	0.247193	6.27312	3.53883e-10	1.16185e-07	ENSG00000183486	6.93485	up
0.565896	-27.1648	4.33242	-6.27012	3.60772e-10	1.1635e-07	ENSG00000237646	6.93423	down
0.565896	-27.1648	4.33242	-6.27012	3.60772e-10	1.1635e-07	ENSG00000180509	6.93423	down
0.982447	26.9723	4.31838	6.24594	4.21253e-10	1.34664e-07	ENSG00000279187	6.87075	up
1.48676	-26.8616	4.31551	-6.22443	4.83313e-10	1.5316e-07	ENSG00000234835	6.81486	down
0.41041	-27.0056	4.34015	-6.22227	4.89999e-10	1.5394e-07	ENSG00000233747	6.81265	down
0.506821	-27.0156	4.34516	-6.21741	5.0543e-10	1.57431e-07	ENSG00000271709	6.80291	down
0.987111	26.798	4.31547	6.20975	5.307e-10	1.63901e-07	ENSG00000260664	6.78542	up
1.14949	26.7473	4.31328	6.20116	5.60478e-10	1.71643e-07	ENSG00000164270	6.76537	up
0.819614	-26.7785	4.31991	-6.19886	5.68727e-10	1.72718e-07	ENSG00000213659	6.76266	down
0.655394	26.8111	4.3313	6.19008	6.01348e-10	1.76733e-07	ENSG00000229727	6.75268	up
0.827618	-26.9484	4.35185	-6.1924	5.92533e-10	1.76733e-07	ENSG00000288969	6.75268	down
0.655394	26.8111	4.3313	6.19008	6.01348e-10	1.76733e-07	ENSG00000234504	6.75268	up
0.655394	26.8111	4.3313	6.19008	6.01348e-10	1.76733e-07	ENSG00000179219	6.75268	up
1.27974	26.6323	4.30931	6.18017	6.40321e-10	1.86682e-07	ENSG00000259092	6.7289	up
0.4761	-26.8372	4.34551	-6.17585	6.58092e-10	1.9034e-07	ENSG00000277425	6.72047	down
0.581564	-26.6367	4.32758	-6.15511	7.50249e-10	2.13604e-07	ENSG00000213587	6.67039	down
0.581564	-26.6367	4.32758	-6.15511	7.50249e-10	2.13604e-07	ENSG00000285971	6.67039	down
0.616267	26.5396	4.32691	6.13361	8.59047e-10	2.42684e-07	ENSG00000188280	6.61496	up
0.954401	26.4281	4.31878	6.11935	9.39602e-10	2.63399e-07	ENSG00000230316	6.57939	up
1.20204	-26.3974	4.3148	-6.11787	9.48339e-10	2.63819e-07	ENSG00000283683	6.57869	down
0.736972	26.4418	4.32456	6.11434	9.69565e-10	2.67681e-07	ENSG00000141096	6.57238	up
1.64131	-26.2939	4.3083	-6.10307	1.04049e-09	2.85101e-07	ENSG00000106302	6.545	down
0.559952	-26.3917	4.33321	-6.09056	1.12519e-09	3.06009e-07	ENSG00000202392	6.51427	down
1.12489	-26.2137	4.31749	-6.07151	1.26711e-09	3.42054e-07	ENSG00000176857	6.46591	down
0.998015	25.9776	4.31638	6.01838	1.76171e-09	4.72073e-07	ENSG00000178645	6.32599	up
1759.53	0.896594	0.149327	6.00424	1.92227e-09	5.11338e-07	ENSG00000181381	6.29129	unchanged
0.988232	25.7343	4.3038	5.97942	2.23928e-09	5.91349e-07	ENSG00000257035	6.22816	up
2.46229	25.8153	4.323	5.97161	2.34917e-09	6.15904e-07	ENSG00000280109	6.21049	up
0.94909	-25.6688	4.31222	-5.95258	2.6395e-09	6.87082e-07	ENSG00000181847	6.16299	down
0.492458	-25.7228	4.33237	-5.93735	2.89668e-09	7.28025e-07	ENSG00000236607	6.13785	down
0.736418	25.6627	4.32164	5.93818	2.88201e-09	7.28025e-07	ENSG00000290918	6.13785	up
0.441748	25.7604	4.33811	5.93818	2.88212e-09	7.28025e-07	ENSG00000202490	6.13785	up
0.492458	-25.7228	4.33237	-5.93735	2.89668e-09	7.28025e-07	ENSG00000258450	6.13785	down
0.736418	25.6627	4.32164	5.93818	2.88201e-09	7.28025e-07	ENSG00000279757	6.13785	up
0.806347	-25.6765	4.32921	-5.931	3.01086e-09	7.5154e-07	ENSG00000260190	6.12405	down
0.724215	-25.6294	4.33021	-5.91875	3.24397e-09	8.04217e-07	ENSG00000228995	6.09463	down
0.433001	-25.6157	4.33835	-5.90448	3.53771e-09	8.71112e-07	ENSG00000251001	6.05993	down
2.99923	19.8684	3.38299	5.87303	4.27896e-09	1.04656e-06	ENSG00000168748	5.98023	up
486.757	1.36063	0.232224	5.85915	4.65248e-09	1.12285e-06	ENSG00000185885	5.94968	up
0.426388	25.4266	4.33908	5.85992	4.63089e-09	1.12285e-06	ENSG00000222588	5.94968	up
0.410493	-25.2782	4.34979	-5.81135	6.19707e-09	1.48579e-06	ENSG00000207142	5.82804	down
5511.39	1.38083	0.238237	5.79605	6.7896e-09	1.61721e-06	ENSG00000089127	5.79123	up
0.411603	25.1888	4.35007	5.79043	7.02052e-09	1.65064e-06	ENSG00000267402	5.78235	up
0.411603	25.1888	4.35007	5.79043	7.02052e-09	1.65064e-06	ENSG00000269799	5.78235	up
0.741547	24.9767	4.32217	5.77872	7.52689e-09	1.75835e-06	ENSG00000251075	5.75489	up
0.491684	24.7915	4.34616	5.70424	1.16865e-08	2.71269e-06	ENSG00000283588	5.5666	up
0.657999	24.7674	4.34332	5.70241	1.18123e-08	2.72453e-06	ENSG00000240925	5.56471	up
0.492625	-24.7523	4.34676	-5.69442	1.23791e-08	2.83731e-06	ENSG00000271021	5.54709	down
0.564942	-24.7246	4.34429	-5.69129	1.2608e-08	2.8717e-06	ENSG00000287791	5.54186	down
0.573816	24.6897	4.34411	5.68347	1.31986e-08	2.98756e-06	ENSG00000283175	5.52468	up
0.48281	-24.6356	4.3464	-5.66805	1.44433e-08	3.20949e-06	ENSG00000160683	5.49356	down
0.48281	-24.6356	4.3464	-5.66805	1.44433e-08	3.20949e-06	ENSG00000266079	5.49356	down
0.48281	-24.6356	4.3464	-5.66805	1.44433e-08	3.20949e-06	ENSG00000235914	5.49356	down
0.902343	24.5904	4.33972	5.66636	1.45859e-08	3.22155e-06	ENSG00000273013	5.49194	up
6763.52	1.21068	0.21384	5.66161	1.49961e-08	3.29219e-06	ENSG00000134321	5.48251	up
646.442	0.92639	0.163765	5.65681	1.54208e-08	3.36515e-06	ENSG00000125355	5.473	unchanged
0.741481	24.3007	4.32423	5.61965	1.91349e-08	4.15078e-06	ENSG00000232077	5.38187	up
0.811337	-24.326	4.34066	-5.60421	2.09201e-08	4.5112e-06	ENSG00000220695	5.34571	down
1.05773	-23.9892	4.33858	-5.52927	3.2156e-08	6.8933e-06	ENSG00000121075	5.16157	down
0.656888	-24.0003	4.34318	-5.52597	3.27672e-08	6.94265e-06	ENSG00000213215	5.15847	down
0.656888	-24.0003	4.34318	-5.52597	3.27672e-08	6.94265e-06	ENSG00000229206	5.15847	down
2.29672	23.0502	4.21999	5.46215	4.70389e-08	9.9089e-06	ENSG00000221845	5.00397	up
2.30867	-22.8095	4.19767	-5.43384	5.51536e-08	1.15515e-05	ENSG00000211750	4.93736	down
2.81098	21.2034	3.909	5.42426	5.81951e-08	1.21189e-05	ENSG00000171931	4.91654	up
2.33815	22.5317	4.17264	5.39988	6.66865e-08	1.38083e-05	ENSG00000286482	4.85986	up
3.33493	-18.9848	3.52719	-5.38241	7.34952e-08	1.51321e-05	ENSG00000144644	4.8201	down
1106.21	1.02975	0.192561	5.34767	8.90936e-08	1.82407e-05	ENSG00000124780	4.73896	up
2.2303	23.179	4.35173	5.32638	1.00187e-07	2.03973e-05	ENSG00000280614	4.69043	up
2.49219	19.8502	3.74935	5.29432	1.1946e-07	2.41859e-05	ENSG00000273183	4.61644	up
2.45397	-22.8488	4.33407	-5.2719	1.35016e-07	2.71844e-05	ENSG00000235440	4.56568	down
1487.29	0.506049	0.0960162	5.27045	1.36087e-07	2.72496e-05	ENSG00000153989	4.56464	unchanged
491.82	1.634	0.311751	5.24137	1.59386e-07	3.17405e-05	ENSG00000169248	4.49839	up
6328.35	-0.552119	0.105591	-5.22884	1.70574e-07	3.37838e-05	ENSG00000100867	4.47129	unchanged
119.56	1.84042	0.352439	5.22196	1.77043e-07	3.48756e-05	ENSG00000131203	4.45748	up
2.21732	22.0738	4.23378	5.21373	1.85083e-07	3.62633e-05	ENSG00000289788	4.44053	up
2.62556	-22.4254	4.35156	-5.15342	2.55782e-07	4.95823e-05	ENSG00000228510	4.30467	down
2.22507	22.4302	4.35187	5.15414	2.54801e-07	4.95823e-05	ENSG00000226288	4.30467	up
1.61307	-18.4306	3.62392	-5.08582	3.66045e-07	7.05808e-05	ENSG00000273972	4.15131	down
3.10628	21.8014	4.30343	5.06605	4.06156e-07	7.79029e-05	ENSG00000168079	4.10845	up
5.49446	-16.7922	3.35277	-5.00845	5.48715e-07	0.000104695	ENSG00000152591	3.98007	down
1.9726	21.4468	4.30809	4.97826	6.41575e-07	0.000121776	ENSG00000235012	3.91444	up
3.01676	21.3708	4.30542	4.9637	6.91638e-07	0.000130598	ENSG00000280362	3.88406	up
1.88787	21.2217	4.30728	4.92693	8.35303e-07	0.000156912	ENSG00000118194	3.80434	up
231.459	1.5078	0.306196	4.92429	8.46651e-07	0.000158228	ENSG00000075213	3.80072	up
4169.48	0.43974	0.0898726	4.89293	9.93479e-07	0.000184721	ENSG00000213853	3.73348	unchanged
1.31426	21.3254	4.36314	4.88763	1.02056e-06	0.000188794	ENSG00000207577	3.72401	up
2.46518	-18.4488	3.77824	-4.88291	1.0453e-06	0.000192393	ENSG00000287088	3.71581	down
0.831822	-20.943	4.31227	-4.8566	1.19419e-06	0.000218609	ENSG00000270052	3.66033	down
2174.85	0.857396	0.176576	4.85568	1.19973e-06	0.000218609	ENSG00000184979	3.66033	unchanged
1.31103	-20.8811	4.30341	-4.85222	1.22085e-06	0.00022135	ENSG00000285572	3.65492	down
3651.82	0.543639	0.112118	4.8488	1.24211e-06	0.00022409	ENSG00000184678	3.64958	unchanged
1.03335	20.9085	4.31724	4.84303	1.27875e-06	0.000229563	ENSG00000275401	3.6391	up
5196.85	0.709207	0.146597	4.83779	1.31292e-06	0.000234543	ENSG00000124201	3.62978	unchanged
1.73149	20.792	4.30076	4.83451	1.33474e-06	0.000237278	ENSG00000255299	3.62474	up
0.892011	-20.7465	4.31236	-4.81095	1.50216e-06	0.000265743	ENSG00000289589	3.57554	down
3287.42	1.18945	0.248407	4.78832	1.68186e-06	0.000296097	ENSG00000134326	3.52857	up
4131.7	-0.374708	0.0782728	-4.7872	1.69125e-06	0.000296319	ENSG00000171223	3.52824	unchanged
1.10768	-20.598	4.30496	-4.78472	1.71222e-06	0.000297857	ENSG00000225963	3.52599	down
6715.22	-0.494548	0.10337	-4.78424	1.71638e-06	0.000297857	ENSG00000130733	3.52599	unchanged
2.16401	18.4433	3.85583	4.78323	1.72497e-06	0.000297929	ENSG00000175518	3.52589	up
9.60961	20.7108	4.33093	4.78206	1.73505e-06	0.000298257	ENSG00000183638	3.52541	up
2480.99	0.972649	0.203788	4.77285	1.81637e-06	0.000310769	ENSG00000137628	3.50756	unchanged
40.2174	-2.83214	0.59518	-4.75846	1.95074e-06	0.000332199	ENSG00000181291	3.4786	down
1.90967	-18.0642	3.80023	-4.75345	1.99975e-06	0.000338962	ENSG00000234842	3.46985	down
2272.63	-0.660063	0.139218	-4.74122	2.12438e-06	0.00035842	ENSG00000225663	3.44561	unchanged
1.31472	20.4152	4.31299	4.73343	2.20761e-06	0.000370746	ENSG00000110665	3.43092	up
1.20103	-20.3037	4.31364	-4.70687	2.5155e-06	0.000420516	ENSG00000205899	3.37622	down
1.9238	-20.2759	4.32041	-4.69305	2.69161e-06	0.000447333	ENSG00000285716	3.34937	down
581.156	-0.747781	0.159361	-4.69238	2.70047e-06	0.000447333	ENSG00000130300	3.34937	unchanged
1.01856	20.1957	4.31484	4.68052	2.86148e-06	0.000471859	ENSG00000243574	3.32619	up
1.02479	-20.1852	4.31388	-4.67914	2.88074e-06	0.000472896	ENSG00000253593	3.32523	down
0.871265	-20.1029	4.30761	-4.66683	3.05877e-06	0.000499868	ENSG00000255067	3.30114	down
1.58668	-20.1748	4.32607	-4.66354	3.10812e-06	0.000505666	ENSG00000254704	3.29614	down
0.903567	20.075	4.30955	4.65826	3.18898e-06	0.000516515	ENSG00000290421	3.28692	up
0.941413	20.0337	4.31884	4.63868	3.50634e-06	0.000565405	ENSG00000223718	3.24764	up
24.9153	-4.78796	1.03282	-4.6358	3.55563e-06	0.000570827	ENSG00000136928	3.2435	down
603.004	1.08904	0.23509	4.63243	3.61394e-06	0.000575121	ENSG00000134716	3.24024	up
657.683	-0.725103	0.156506	-4.63308	3.6027e-06	0.000575121	ENSG00000174791	3.24024	unchanged
0.737359	19.9657	4.32066	4.62099	3.81905e-06	0.00060512	ENSG00000257137	3.21816	up
330.956	-1.10317	0.238952	-4.61672	3.89859e-06	0.000615049	ENSG00000118777	3.21109	down
600.231	-0.788467	0.170918	-4.61312	3.96671e-06	0.000622502	ENSG00000166997	3.20586	unchanged
0.656833	19.9541	4.32617	4.61242	3.98e-06	0.000622502	ENSG00000237263	3.20586	up
0.794123	-19.8685	4.30968	-4.61019	4.02298e-06	0.000626536	ENSG00000247982	3.20305	down
1.21637	19.8841	4.31924	4.60362	4.15205e-06	0.000643887	ENSG00000285908	3.19119	up
1.65652	20.1038	4.37009	4.60031	4.21869e-06	0.000651449	ENSG00000248547	3.18612	up
0.853348	19.8537	4.3198	4.59597	4.30748e-06	0.000662353	ENSG00000270077	3.17891	up
13865.1	0.511123	0.111312	4.5918	4.39436e-06	0.000672873	ENSG00000145321	3.17207	unchanged
1.81035	19.7245	4.30396	4.58288	4.58613e-06	0.000699299	ENSG00000152910	3.15534	up
1.17284	19.6176	4.31211	4.54942	5.37948e-06	0.000816852	ENSG00000196344	3.08786	up
0.770744	19.5697	4.32394	4.52589	6.01409e-06	0.000905667	ENSG00000224333	3.04303	up
5855.88	0.863039	0.190662	4.52655	5.99537e-06	0.000905667	ENSG00000156587	3.04303	unchanged
1.58643	19.7783	4.38755	4.50782	6.54979e-06	0.00098228	ENSG00000226985	3.00776	up
1.14035	-19.4852	4.32701	-4.50314	6.6956e-06	0.00100003	ENSG00000224409	2.99999	down
3324.38	0.749324	0.166453	4.50172	6.74056e-06	0.00100264	ENSG00000055332	2.99886	unchanged
0.686474	-19.4179	4.33011	-4.48439	7.31224e-06	0.00108171	ENSG00000213121	2.96589	down
1.03028	-19.3435	4.31406	-4.48383	7.33149e-06	0.00108171	ENSG00000171989	2.96589	down
0.644574	-19.3624	4.33187	-4.46977	7.83043e-06	0.00114146	ENSG00000287415	2.94254	down
0.644574	-19.3624	4.33187	-4.46977	7.83043e-06	0.00114146	ENSG00000289530	2.94254	down
0.644574	-19.3624	4.33187	-4.46977	7.83043e-06	0.00114146	ENSG00000232437	2.94254	down
0.682678	19.3118	4.32531	4.46484	8.01297e-06	0.00116341	ENSG00000250133	2.93427	up
0.512009	19.2832	4.33448	4.44878	8.63604e-06	0.0012489	ENSG00000231990	2.90347	up
5349.99	0.559978	0.126133	4.43959	9.01323e-06	0.0012983	ENSG00000130643	2.88663	unchanged
0.510343	-19.2297	4.33405	-4.43689	9.12678e-06	0.0013063	ENSG00000253039	2.88396	down
1.39267	19.1896	4.32532	4.43657	9.14048e-06	0.0013063	ENSG00000182156	2.88396	up
2949.74	0.630708	0.142214	4.43491	9.21094e-06	0.00131123	ENSG00000163644	2.88232	unchanged
0.765282	19.1249	4.32103	4.426	9.59957e-06	0.00136123	ENSG00000187416	2.86607	up
0.875998	-19.0496	4.31799	-4.41169	1.02565e-05	0.00144875	ENSG00000287789	2.83901	down
0.73786	-19.3829	4.3954	-4.40981	1.0346e-05	0.00145575	ENSG00000200792	2.83691	down
1.15366	-18.8865	4.28619	-4.40637	1.05117e-05	0.00147337	ENSG00000258216	2.83169	down
0.600074	19.0697	4.33223	4.40183	1.07341e-05	0.00149879	ENSG00000184357	2.82426	up
1.34882	-18.668	4.24836	-4.39416	1.11199e-05	0.00154673	ENSG00000279129	2.81058	down
1.5096	-18.8917	4.30901	-4.38424	1.1639e-05	0.00161277	ENSG00000230051	2.79243	down
0.711445	18.9088	4.32201	4.375	1.21432e-05	0.00167626	ENSG00000264739	2.77566	up
0.506547	18.8934	4.33079	4.36257	1.28543e-05	0.00174794	ENSG00000237685	2.75747	up
1.50057	-18.7652	4.29965	-4.36436	1.27494e-05	0.00174794	ENSG00000147570	2.75747	down
0.506547	18.8934	4.33079	4.36257	1.28543e-05	0.00174794	ENSG00000240385	2.75747	up
0.506547	18.8934	4.33079	4.36257	1.28543e-05	0.00174794	ENSG00000279286	2.75747	up
1.38128	-18.7762	4.30998	-4.35644	1.32195e-05	0.00179092	ENSG00000258881	2.74692	down
3241.03	1.55074	0.356507	4.34981	1.36255e-05	0.00183909	ENSG00000165949	2.7354	up
1.38179	18.7291	4.31343	4.34203	1.4117e-05	0.00189839	ENSG00000267065	2.72161	up
1547.94	-0.568377	0.131042	-4.33738	1.4419e-05	0.00193188	ENSG00000196104	2.71402	unchanged
0.504326	-18.7682	4.33042	-4.33404	1.46395e-05	0.0019488	ENSG00000235777	2.71023	down
1.05934	-18.9446	4.37132	-4.33385	1.46522e-05	0.0019488	ENSG00000250041	2.71023	down
2.27019	-18.6014	4.30491	-4.32097	1.55343e-05	0.0020586	ENSG00000188822	2.68643	down
2759.11	-0.37154	0.0861221	-4.3141	1.60253e-05	0.00211598	ENSG00000167645	2.67449	unchanged
2.14442	18.534	4.30547	4.30475	1.67171e-05	0.00219936	ENSG00000233471	2.6577	up
3577.07	0.775465	0.180249	4.30219	1.69117e-05	0.00221695	ENSG00000115267	2.65424	unchanged
2.20044	18.4446	4.30547	4.28399	1.83573e-05	0.00239783	ENSG00000284196	2.62018	up
4007.79	0.663988	0.155042	4.28264	1.84691e-05	0.00240383	ENSG00000173193	2.6191	unchanged
3823.98	-0.560218	0.130896	-4.27988	1.86996e-05	0.00242515	ENSG00000168268	2.61526	unchanged
0.573151	18.5092	4.32724	4.27737	1.89118e-05	0.002437	ENSG00000204455	2.61314	up
2.18743	-18.4144	4.30522	-4.27721	1.89246e-05	0.002437	ENSG00000286289	2.61314	down
1.3207	18.5001	4.33038	4.27217	1.9358e-05	0.00248403	ENSG00000279537	2.60484	up
0.473826	-18.5041	4.33277	-4.27072	1.9484e-05	0.00249142	ENSG00000253184	2.60355	down
1.17877	-18.4064	4.31166	-4.26899	1.9636e-05	0.00250208	ENSG00000288533	2.6017	down
15277.7	0.529585	0.124087	4.26785	1.97367e-05	0.00250615	ENSG00000160710	2.60099	unchanged
3437.66	-0.722208	0.169376	-4.26393	2.00867e-05	0.00254173	ENSG00000099994	2.59487	unchanged
0.429405	18.5245	4.34802	4.26045	2.04014e-05	0.00256375	ENSG00000237930	2.59112	up
0.429405	18.5245	4.34802	4.26045	2.04014e-05	0.00256375	ENSG00000273091	2.59112	up
7182.18	0.43591	0.10239	4.25735	2.0686e-05	0.00259058	ENSG00000189060	2.5866	unchanged
1.4555	18.3292	4.30956	4.25314	2.10795e-05	0.00263082	ENSG00000259335	2.57991	up
1.43656	18.2481	4.29285	4.25081	2.12999e-05	0.00264926	ENSG00000273381	2.57688	up
236.85	-1.34369	0.316266	-4.24861	2.151e-05	0.00265725	ENSG00000158578	2.57557	down
2.12198	-18.3654	4.32222	-4.24906	2.14668e-05	0.00265725	ENSG00000286959	2.57557	down
16043.4	1.45441	0.343617	4.23265	2.30957e-05	0.00283889	ENSG00000126709	2.54685	up
12357.7	-0.333706	0.0788482	-4.23225	2.31362e-05	0.00283889	ENSG00000176840	2.54685	unchanged
1.39373	-18.2202	4.3099	-4.22752	2.36285e-05	0.00288957	ENSG00000279164	2.53917	down
1.6385	18.2085	4.30814	4.22653	2.3732e-05	0.00289252	ENSG00000225988	2.53872	up
1.47636	-18.1957	4.30937	-4.22236	2.41755e-05	0.00293676	ENSG00000185105	2.53213	down
10687.5	-0.394953	0.0936294	-4.21826	2.46199e-05	0.00297094	ENSG00000095981	2.52711	unchanged
4288.02	0.4376	0.103729	4.21869	2.45728e-05	0.00297094	ENSG00000155629	2.52711	unchanged
0.493676	18.3137	4.34661	4.21334	2.51619e-05	0.00302632	ENSG00000204776	2.51909	up
1.6392	-18.1263	4.30781	-4.20776	2.57911e-05	0.00309179	ENSG00000280214	2.50979	down
1.46203	-18.1142	4.31074	-4.2021	2.64451e-05	0.0031598	ENSG00000163394	2.50034	down
1.27053	16.3296	3.89121	4.19654	2.71028e-05	0.00322781	ENSG00000278383	2.49109	up
1.54466	-18.0832	4.31042	-4.19524	2.72589e-05	0.00323581	ENSG00000284616	2.49002	down
1.01306	-18.1466	4.32698	-4.19383	2.74284e-05	0.00324537	ENSG00000181074	2.48874	down
20196.6	-0.314975	0.0751363	-4.19205	2.76439e-05	0.00326029	ENSG00000168003	2.48674	unchanged
1.23419	18.0777	4.31717	4.1874	2.82167e-05	0.0033171	ENSG00000260161	2.47924	up
0.741566	18.1521	4.34166	4.18092	2.90335e-05	0.00340215	ENSG00000220154	2.46825	up
1.31395	18.1858	4.35536	4.17549	2.97344e-05	0.00346937	ENSG00000288860	2.45975	up
14806.7	-0.402655	0.0964442	-4.17501	2.97976e-05	0.00346937	ENSG00000131143	2.45975	unchanged
1.37371	-18.0003	4.31662	-4.17	3.04606e-05	0.00352405	ENSG00000278344	2.45296	down
1.25158	-18.2315	4.37142	-4.17061	3.03784e-05	0.00352405	ENSG00000198153	2.45296	down
1.04126	-17.9788	4.31622	-4.1654	3.10811e-05	0.00357962	ENSG00000229613	2.44616	down
772.029	-0.557479	0.13387	-4.16434	3.1225e-05	0.00357962	ENSG00000104731	2.44616	unchanged
1.17783	17.8979	4.29796	4.16427	3.12356e-05	0.00357962	ENSG00000264116	2.44616	up
1746.6	-0.457079	0.109831	-4.16166	3.15948e-05	0.00360943	ENSG00000153002	2.44256	unchanged
1.27473	17.9351	4.31132	4.16001	3.18233e-05	0.00362417	ENSG00000130377	2.44079	up
1.27776	17.8549	4.29329	4.15879	3.19935e-05	0.00363221	ENSG00000279678	2.43983	up
0.854961	-17.9575	4.32247	-4.15446	3.26056e-05	0.0036902	ENSG00000261318	2.43295	down
4159.78	-0.613524	0.147843	-4.14984	3.32715e-05	0.00375391	ENSG00000169710	2.42552	unchanged
1.09395	17.8572	4.31342	4.1399	3.4745e-05	0.00390806	ENSG00000285684	2.40804	up
0.815323	-17.9475	4.34087	-4.13455	3.55652e-05	0.00398801	ENSG00000248300	2.39924	down
1.0986	17.8195	4.31342	4.13119	3.60893e-05	0.00400977	ENSG00000244791	2.39688	up
12222.6	-0.376193	0.0910399	-4.13218	3.59332e-05	0.00400977	ENSG00000182809	2.39688	unchanged
1.15696	-17.8197	4.31318	-4.13144	3.60494e-05	0.00400977	ENSG00000231907	2.39688	down
0.718462	17.8781	4.32951	4.12937	3.63765e-05	0.00401718	ENSG00000272784	2.39608	up
0.718462	17.8781	4.32951	4.12937	3.63765e-05	0.00401718	ENSG00000221836	2.39608	up
1.24525	-17.7967	4.31128	-4.12795	3.66019e-05	0.00402986	ENSG00000225569	2.39471	down
1.17058	-18.1008	4.38867	-4.12444	3.71636e-05	0.00406713	ENSG00000282499	2.39071	down
1.07063	-17.7907	4.31332	-4.12459	3.71391e-05	0.00406713	ENSG00000187682	2.39071	down
112.271	1.42355	0.345495	4.12034	3.78316e-05	0.00412784	ENSG00000164619	2.38428	up
1.0689	-17.7681	4.31396	-4.11875	3.80929e-05	0.00413975	ENSG00000236511	2.38303	down
1.46763	-17.9341	4.35473	-4.1183	3.8168e-05	0.00413975	ENSG00000258926	2.38303	down
1.37162	17.7267	4.31194	4.11106	3.93842e-05	0.00425898	ENSG00000229696	2.37069	up
1.36076	-17.8007	4.3319	-4.10921	3.97013e-05	0.00428057	ENSG00000242330	2.3685	down
1.17832	-17.7722	4.32578	-4.10843	3.98362e-05	0.00428245	ENSG00000279841	2.36831	down
2.02006	-17.8752	4.35407	-4.1054	4.03608e-05	0.00432608	ENSG00000249478	2.36391	down
6255.59	-0.340068	0.0829081	-4.10175	4.10037e-05	0.00438211	ENSG00000104522	2.35832	unchanged
1.3279	-17.6997	4.31925	-4.09787	4.16974e-05	0.00444321	ENSG00000270098	2.3523	down
23.2313	-3.33084	0.813293	-4.0955	4.21266e-05	0.00447586	ENSG00000164100	2.34912	down
0.869292	-17.6523	4.31787	-4.0882	4.34731e-05	0.0046055	ENSG00000242551	2.33672	down
2.89203	-16.8642	4.12998	-4.08336	4.43886e-05	0.00468886	ENSG00000179046	2.32893	down
1.33613	-17.5867	4.31203	-4.07852	4.5323e-05	0.00477372	ENSG00000136535	2.32114	down
1.16137	17.6822	4.33894	4.07524	4.59678e-05	0.00482768	ENSG00000273597	2.31626	up
1.13027	17.5301	4.31456	4.063	4.84457e-05	0.00507329	ENSG00000285800	2.29471	up
1.21462	17.4695	4.31525	4.04833	5.15841e-05	0.00538648	ENSG00000288547	2.2687	up
1001.66	0.654315	0.161759	4.04501	5.23216e-05	0.00544788	ENSG00000144712	2.26377	unchanged
2410.27	0.615039	0.152208	4.04078	5.32743e-05	0.00553126	ENSG00000166471	2.25718	unchanged
0.80297	-17.4396	4.31866	-4.03821	5.38609e-05	0.00557629	ENSG00000224895	2.25365	down
0.786662	-17.4332	4.31939	-4.03604	5.43616e-05	0.00559633	ENSG00000217653	2.2521	down
0.786662	-17.4332	4.31939	-4.03604	5.43616e-05	0.00559633	ENSG00000286130	2.2521	down
0.974955	17.3731	4.31704	4.0243	5.71448e-05	0.00586627	ENSG00000255553	2.23164	up
1.1278	-17.3114	4.30341	-4.02273	5.75286e-05	0.00588909	ENSG00000101440	2.22995	down
1.12689	17.2436	4.31826	3.99318	6.51938e-05	0.00665506	ENSG00000239696	2.17685	up
6070.37	-0.338634	0.0848722	-3.98992	6.60948e-05	0.00672819	ENSG00000167964	2.1721	unchanged
1.047	17.2089	4.31892	3.98452	6.76158e-05	0.00686385	ENSG00000287055	2.16343	up
0.861463	-17.1549	4.30876	-3.98139	6.85131e-05	0.00693562	ENSG00000283509	2.15891	down
0.969809	-16.7379	4.20569	-3.97982	6.89686e-05	0.00696239	ENSG00000236848	2.15724	down
0.635041	17.2147	4.32623	3.97914	6.91665e-05	0.00696307	ENSG00000105679	2.1572	up
1518.49	0.426563	0.107255	3.9771	6.97607e-05	0.00700355	ENSG00000138032	2.15468	unchanged
23175.6	0.3506	0.088256	3.97253	7.11134e-05	0.00711974	ENSG00000138207	2.14754	unchanged
0.94218	-17.148	4.31755	-3.9717	7.1362e-05	0.00712505	ENSG00000249917	2.14721	down
0.537685	17.1991	4.34383	3.95943	7.51276e-05	0.00748053	ENSG00000237520	2.12607	up
0.731958	-17.0865	4.32101	-3.95429	7.67615e-05	0.0076224	ENSG00000227683	2.11791	down
3486.95	0.53022	0.134271	3.94888	7.85165e-05	0.00777548	ENSG00000163840	2.10927	unchanged
6843.32	-0.326015	0.0825816	-3.94779	7.8876e-05	0.00778992	ENSG00000141349	2.10847	unchanged
5528.77	-0.333149	0.0844208	-3.94628	7.93735e-05	0.00780172	ENSG00000123416	2.10781	unchanged
0.929092	17.1208	4.33862	3.94613	7.94237e-05	0.00780172	ENSG00000258670	2.10781	up
0.515942	17.1319	4.34452	3.94334	8.03537e-05	0.00782976	ENSG00000225233	2.10625	up
0.515942	17.1319	4.34452	3.94334	8.03537e-05	0.00782976	ENSG00000279746	2.10625	up
0.515942	17.1319	4.34452	3.94334	8.03537e-05	0.00782976	ENSG00000268355	2.10625	up
0.92326	-17.0926	4.33867	-3.93961	8.16155e-05	0.0079315	ENSG00000173250	2.10064	down
0.775237	17.0693	4.33604	3.93662	8.26386e-05	0.00800957	ENSG00000258823	2.09639	up
4466.81	-0.497967	0.126548	-3.935	8.31977e-05	0.00804237	ENSG00000228474	2.09462	unchanged
0.719723	-17.0039	4.33072	-3.92635	8.6245e-05	0.00831488	ENSG00000282381	2.08014	down
0.536104	16.9787	4.33009	3.9211	8.81452e-05	0.00847566	ENSG00000230176	2.07183	up
0.78515	-16.9312	4.32156	-3.91784	8.93445e-05	0.00856837	ENSG00000186766	2.0671	down
0.572796	16.9225	4.32788	3.91011	9.22535e-05	0.00882413	ENSG00000234788	2.05433	up
0.892566	17.0111	4.35324	3.90769	9.31811e-05	0.00887679	ENSG00000259592	2.05174	up
0.649909	-16.8968	4.32429	-3.90741	9.32912e-05	0.00887679	ENSG00000225413	2.05174	down
835.387	0.584709	0.149979	3.89862	9.67443e-05	0.00918138	ENSG00000137502	2.03709	unchanged
0.807526	-16.851	4.32395	-3.89714	9.73353e-05	0.00918599	ENSG00000285554	2.03687	down
1082.8	2.04759	0.52548	3.89661	9.7549e-05	0.00918599	ENSG00000111335	2.03687	up
0.787833	-16.9872	4.35867	-3.89732	9.72619e-05	0.00918599	ENSG00000277255	2.03687	down
2425.46	0.691632	0.177869	3.88842	0.000100897	0.00947678	ENSG00000101347	2.02334	unchanged
175.624	1.31168	0.337651	3.88473	0.000102445	0.00959742	ENSG00000164045	2.01785	up
0.787897	-16.7684	4.32471	-3.87734	0.000105607	0.00986447	ENSG00000286068	2.00593	down
0.555957	-16.8185	4.33823	-3.87681	0.000105837	0.00986447	ENSG00000285769	2.00593	down
0.5657	-16.789	4.33382	-3.87395	0.000107086	0.00995543	ENSG00000259166	2.00194	down
0.56786	-16.7515	4.3289	-3.8697	0.000108968	0.0100281	ENSG00000289206	1.99878	down
0.56786	-16.7515	4.3289	-3.8697	0.000108968	0.0100281	ENSG00000268940	1.99878	down
0.666685	-16.8551	4.35449	-3.87074	0.000108507	0.0100281	ENSG00000254846	1.99878	down
0.56786	-16.7515	4.3289	-3.8697	0.000108968	0.0100281	ENSG00000259474	1.99878	down
895.118	0.861878	0.223169	3.86199	0.000112469	0.0102988	ENSG00000135899	1.98721	unchanged
411.02	1.41573	0.366581	3.86197	0.000112475	0.0102988	ENSG00000137496	1.98721	up
0.490193	16.7047	4.3329	3.85531	0.000115583	0.0105568	ENSG00000227088	1.97647	up
0.487972	-16.6936	4.33268	-3.85294	0.000116706	0.0106328	ENSG00000270930	1.97335	down
2617.7	-0.521258	0.135338	-3.85153	0.000117381	0.0106676	ENSG00000160360	1.97193	unchanged
1.31979	-16.6618	4.33266	-3.84563	0.000120242	0.0108734	ENSG00000286882	1.96363	down
0.564289	16.6703	4.33456	3.84591	0.000120107	0.0108734	ENSG00000243568	1.96363	up
0.445518	-16.6694	4.33668	-3.8438	0.000121142	0.0109277	ENSG00000227292	1.96147	down
58311.9	0.459182	0.119487	3.84294	0.000121569	0.0109391	ENSG00000108679	1.96102	unchanged
1.71927	16.6974	4.35924	3.83035	0.000127959	0.0114858	ENSG00000122121	1.93984	up
0.468343	-16.5796	4.33393	-3.82553	0.000130493	0.0116844	ENSG00000264932	1.93239	down
0.550979	-16.5238	4.33476	-3.81194	0.00013788	0.0123156	ENSG00000261126	1.90955	down
2402.54	-0.426692	0.11212	-3.80568	0.000141413	0.0126003	ENSG00000129968	1.89962	unchanged
833.4	0.428744	0.11302	3.79353	0.000148524	0.0132016	ENSG00000166912	1.87937	unchanged
0.87401	16.5341	4.3626	3.78996	0.000150674	0.0133601	ENSG00000173626	1.87419	up
0.710756	-16.3932	4.33185	-3.78434	0.00015412	0.0136325	ENSG00000289912	1.86543	down
1.23143	-16.477	4.35885	-3.78012	0.000156751	0.0138317	ENSG00000213355	1.85912	down
1070.21	0.491817	0.130253	3.77585	0.000159466	0.0140372	ENSG00000108947	1.85272	unchanged
1.04695	-16.4846	4.367	-3.77482	0.000160124	0.0140612	ENSG00000224224	1.85198	down
160.481	1.28724	0.341183	3.77286	0.000161388	0.0141382	ENSG00000198945	1.84961	up
0.564651	16.3793	4.34515	3.76957	0.000163532	0.0142574	ENSG00000286944	1.84596	up
0.564651	16.3793	4.34515	3.76957	0.000163532	0.0142574	ENSG00000214875	1.84596	up
0.725159	-16.4293	4.363	-3.76561	0.000166142	0.014416	ENSG00000225703	1.84116	down
0.473837	-16.3738	4.34818	-3.76566	0.000166109	0.014416	ENSG00000262663	1.84116	down
23444.3	-0.438499	0.116565	-3.76186	0.000168657	0.0145607	ENSG00000117472	1.83682	unchanged
1.19043	16.3788	4.35451	3.76133	0.000169009	0.0145607	ENSG00000243797	1.83682	up
8990.16	0.52594	0.139818	3.76161	0.00016882	0.0145607	ENSG00000149131	1.83682	unchanged
801.889	-0.705487	0.187677	-3.75904	0.000170566	0.0146602	ENSG00000137507	1.83386	unchanged
0.562599	16.3307	4.34585	3.75777	0.000171432	0.0146999	ENSG00000270259	1.83268	up
2839.48	0.33846	0.0901504	3.75439	0.000173762	0.0148648	ENSG00000116977	1.82784	unchanged
47323.4	0.397035	0.105809	3.75238	0.000175164	0.0149496	ENSG00000135744	1.82537	unchanged
395.781	-0.783386	0.208893	-3.75017	0.000176713	0.0150466	ENSG00000119778	1.82256	unchanged
0.482711	16.2938	4.34808	3.74736	0.000178702	0.0151452	ENSG00000243687	1.81972	up
0.482711	16.2938	4.34808	3.74736	0.000178702	0.0151452	ENSG00000064835	1.81972	up
0.6402	-16.458	4.39454	-3.74511	0.000180315	0.0152465	ENSG00000275582	1.81683	down
383.091	-0.611243	0.163298	-3.74312	0.000181752	0.015297	ENSG00000285865	1.81539	unchanged
19097.1	-0.489957	0.13088	-3.74357	0.000181427	0.015297	ENSG00000164587	1.81539	unchanged
5312.63	0.390634	0.104429	3.74066	0.000183541	0.0153765	ENSG00000164040	1.81314	unchanged
1138.37	-0.539959	0.144337	-3.74096	0.000183319	0.0153765	ENSG00000161281	1.81314	unchanged
1717.85	-0.376718	0.10078	-3.73802	0.000185476	0.015503	ENSG00000158792	1.80959	unchanged
0.890059	16.3531	4.37749	3.73573	0.000187172	0.015609	ENSG00000226661	1.80663	up
486.033	0.565724	0.151491	3.73438	0.00018818	0.0156509	ENSG00000107443	1.80546	unchanged
3297.37	0.372062	0.0996442	3.7339	0.000188534	0.0156509	ENSG00000165943	1.80546	unchanged
17.6607	4.65324	1.24847	3.72716	0.000193649	0.016039	ENSG00000165197	1.79482	up
32.9081	2.02317	0.542957	3.7262	0.00019439	0.0160639	ENSG00000236296	1.79415	up
0.553726	-16.186	4.34609	-3.72427	0.000195885	0.0161507	ENSG00000183695	1.79181	down
16690	-0.343018	0.0921494	-3.72241	0.00019733	0.0162332	ENSG00000166557	1.7896	unchanged
0.644178	16.1175	4.33318	3.71956	0.000199571	0.0163806	ENSG00000261588	1.78567	up
452.085	0.851742	0.229123	3.71739	0.000201289	0.0164844	ENSG00000260912	1.78293	unchanged
920.77	-0.610801	0.164366	-3.7161	0.000202321	0.0165318	ENSG00000104524	1.78168	unchanged
0.483308	-16.2504	4.37532	-3.71411	0.000203923	0.0166255	ENSG00000264007	1.77923	down
51.4388	-1.86193	0.503424	-3.69852	0.00021686	0.0176407	ENSG00000186862	1.75348	down
1.39049	-15.976	4.32284	-3.69572	0.000219265	0.0177966	ENSG00000279433	1.74966	down
0.888136	16.267	4.40746	3.69079	0.000223557	0.0181046	ENSG00000239670	1.74221	up
1.03014	16.1016	4.36674	3.68733	0.000226616	0.0183116	ENSG00000255286	1.73727	up
0.395868	-16.1531	4.38383	-3.6847	0.00022897	0.0184609	ENSG00000271543	1.73375	down
1.26513	-16.0581	4.36088	-3.68231	0.000231127	0.0185937	ENSG00000243101	1.73063	down
0.772204	16.1048	4.37703	3.6794	0.000233782	0.0187659	ENSG00000213244	1.72663	up
54881.1	-0.404429	0.109957	-3.67805	0.000235019	0.0188238	ENSG00000074800	1.72529	unchanged
0.40666	16.0971	4.37824	3.67663	0.00023634	0.0188467	ENSG00000225739	1.72476	up
0.657995	16.1473	4.39183	3.67668	0.000236288	0.0188467	ENSG00000201728	1.72476	up
4757.92	0.704931	0.191927	3.67291	0.000239808	0.0190815	ENSG00000188313	1.71939	unchanged
12.5036	5.44098	1.48204	3.67128	0.000241343	0.0191618	ENSG00000140795	1.71756	up
1365.15	-0.484412	0.132102	-3.66697	0.000245441	0.0194448	ENSG00000114279	1.7112	unchanged
1.37505	16.0074	4.37143	3.66183	0.000250421	0.0197963	ENSG00000272995	1.70342	up
22005.5	-0.384612	0.105156	-3.65755	0.000254635	0.0200795	ENSG00000126432	1.69725	unchanged
27.5718	-2.68585	0.73445	-3.65695	0.000255234	0.0200795	ENSG00000182272	1.69725	down
0.939589	-16.0007	4.37602	-3.65645	0.000255736	0.0200795	ENSG00000256633	1.69725	down
2439.58	0.371393	0.101585	3.65597	0.000256208	0.0200795	ENSG00000083642	1.69725	unchanged
1342.65	0.466148	0.127733	3.64938	0.000262874	0.0205578	ENSG00000070718	1.68702	unchanged
0.422361	-15.9622	4.37658	-3.6472	0.000265115	0.0206886	ENSG00000237300	1.68427	down
14290.2	0.315725	0.0867204	3.64072	0.000271873	0.0211706	ENSG00000104635	1.67427	unchanged
1571.02	0.455748	0.125708	3.62544	0.00028847	0.0224151	ENSG00000132623	1.64946	unchanged
1.60093	15.8436	4.37101	3.62469	0.000289304	0.0224322	ENSG00000261795	1.64913	up
1324.45	0.646178	0.178308	3.62395	0.000290142	0.0224493	ENSG00000164284	1.6488	unchanged
3636.24	-0.384389	0.106312	-3.61567	0.00029957	0.0231297	ENSG00000172428	1.63583	unchanged
8365.16	-0.336787	0.0931802	-3.61437	0.000301084	0.0231942	ENSG00000120725	1.63462	unchanged
1469.07	0.482687	0.133566	3.61386	0.000301677	0.0231942	ENSG00000180182	1.63462	unchanged
808.797	0.690904	0.191706	3.60398	0.000313379	0.0238041	ENSG00000118322	1.62335	unchanged
1.64962	15.7017	4.35691	3.60386	0.000313529	0.0238041	ENSG00000286691	1.62335	up
0.486778	15.8575	4.39956	3.60433	0.000312953	0.0238041	ENSG00000255109	1.62335	up
441.966	0.862111	0.239059	3.60626	0.000310639	0.0238041	ENSG00000204175	1.62335	unchanged
0.486778	15.8575	4.39956	3.60433	0.000312953	0.0238041	ENSG00000259051	1.62335	up
431.425	0.974092	0.270288	3.6039	0.000313473	0.0238041	ENSG00000130589	1.62335	unchanged
0.51135	-15.8375	4.39777	-3.60125	0.000316688	0.0239939	ENSG00000259712	1.6199	down
6146.36	0.445827	0.123894	3.59846	0.00032011	0.0241972	ENSG00000069702	1.61623	unchanged
2252.34	0.604029	0.16788	3.59798	0.000320699	0.0241972	ENSG00000173821	1.61623	unchanged
316.235	0.772093	0.214797	3.59452	0.000324991	0.0244199	ENSG00000167981	1.61226	unchanged
4450.84	-0.373091	0.103786	-3.59481	0.000324629	0.0244199	ENSG00000167740	1.61226	unchanged
0.564748	15.8081	4.39912	3.59347	0.000326309	0.0244685	ENSG00000287159	1.61139	up
7502.9	-0.451358	0.125723	-3.5901	0.000330553	0.0246851	ENSG00000116685	1.60757	unchanged
0.493732	15.7989	4.40051	3.59025	0.000330362	0.0246851	ENSG00000242696	1.60757	up
885.994	0.857318	0.238865	3.58913	0.000331779	0.024726	ENSG00000206337	1.60685	unchanged
219.578	-1.09238	0.305068	-3.58076	0.00034259	0.0254796	ENSG00000110680	1.59381	down
4546.36	0.384654	0.107506	3.57798	0.00034626	0.0257001	ENSG00000196141	1.59006	unchanged
14512.6	-0.306108	0.0856168	-3.57532	0.000349794	0.0259096	ENSG00000105701	1.58654	unchanged
528.945	-0.716842	0.201431	-3.55876	0.000372616	0.0275441	ENSG00000243709	1.55997	unchanged
11628.7	-0.567869	0.159707	-3.55569	0.000376989	0.0278109	ENSG00000197061	1.55578	unchanged
54065.2	-0.488368	0.137412	-3.55406	0.000379339	0.0279278	ENSG00000092841	1.55396	unchanged
10430.1	-0.298639	0.0840708	-3.55223	0.000381984	0.0280658	ENSG00000142534	1.55182	unchanged
5195.4	0.391209	0.110425	3.54274	0.000395988	0.0290362	ENSG00000155016	1.53706	unchanged
7947.32	-0.300788	0.0849623	-3.54026	0.000399736	0.0292522	ENSG00000171303	1.53384	unchanged
2725.76	0.628914	0.178036	3.53252	0.000411623	0.0300617	ENSG00000059378	1.52199	unchanged
398.792	0.845252	0.239539	3.52867	0.00041766	0.0304415	ENSG00000223573	1.51653	unchanged
5188.8	0.356535	0.101425	3.51525	0.000439339	0.0319578	ENSG00000132640	1.49542	unchanged
94761	-0.444395	0.126481	-3.51353	0.000442192	0.0321012	ENSG00000156508	1.49348	unchanged
763.124	0.621934	0.177335	3.50712	0.000452983	0.0328192	ENSG00000130021	1.48387	unchanged
0.618224	-15.4042	4.39303	-3.50652	0.000454016	0.0328287	ENSG00000234663	1.48375	down
1050.4	0.626201	0.178815	3.50196	0.000461854	0.0333294	ENSG00000112343	1.47717	unchanged
3960.96	0.401418	0.114714	3.4993	0.000466488	0.0335973	ENSG00000172889	1.4737	unchanged
[truncated: 37,969 more rows]
