# Supplementary material for: CHD3 and CHD4 coordinate gene expression programs to maintain β-cell function and identity in vivo
Source: Research Square preprint supplement (doi:10.21203/rs.3.rs-7880472/v1), 2025-11-07
Supplement: Supplementary file 3 [file cfd179cc7d13a87f189e943b.xlsx]

## Sheet: Jason_ILMN1979_Glm_cpm1gt3KOvsW
	logFC	logCPM	LR	PValue	FDR	bedID	Mi2.control.1_S7_L001_cpm	Mi2.control.2_S8_L001_cpm	Mi2.control.3_S9_L001_cpm	Mi2.control_4_cpm	Chd3-4Db_1_S1_cpm	Chd3-4Db_2_S3_cpm	Chd3-4Db_3_L007_cpm	Mi2.control.1_S7_L001_cpm	Mi2.control.2_S8_L001_cpm	Mi2.control.3_S9_L001_cpm	Mi2.control_4_cpm	Chd3-4Db_1_S1_cpm	Chd3-4Db_2_S3_cpm	Chd3-4Db_3_L007_cpm	PeakID	Chr	Start	End	Strand	Annotation	Detailed.Annotation	Distance.to.TSS	Nearest.PromoterID	Entrez.ID	Nearest.Unigene	ensembl_gene_id	mgi_symbol	description	NearestGene.chromosome_name	NearestGene.start_position	NearestGene.end_position	NearestGene.strand
chr8_125332215_125333386	7.06143	3.39082	654.884	1.93587e-144	2.12317e-139	chr8 125332215 125333386	0.340335	0.1628	0.143444	0.117816	20.692	25.248	25.2631	6	3	3	5	911	984	449	142334	chr8	125332216	125333386	+	Intergenic	Intergenic	-105478	ENSMUST00000156666.1	ENSMUST00000156666	ENSMUST00000156666	ENSMUSG00000086694	Gm16237	predicted gene 16237 [Source:MGI Symbol;Acc:MGI:3802105]	8	125951139	125954062	-1
chr5_112031877_112032605	5.84828	3.44725	625.34	5.15598e-138	2.82741e-133	chr5 112031877 112032605	0.510502	0.434132	0.478146	0.329885	25.0076	25.6329	22.2248	9	8	10	14	1101	999	395	114084	chr5	112031878	112032605	+	Intergenic	Intergenic	-88006	ENSMUST00000197648.1	ENSMUST00000197648	ENSMUST00000197648	ENSMUSG00000106060	Gm42488	predicted gene 42488 [Source:MGI Symbol;Acc:MGI:5662625]	5	112087670	112092101	-1
chr3_134338999_134339871	7.42417	3.00263	621.656	3.26305e-137	1.19292e-132	chr3 134338999 134339871	0.170167	0.0542665	0.0956292	0.0942529	17.2395	17.5504	19.4678	3	1	2	4	759	684	346	96739	chr3	134339000	134339871	+	Intergenic	Intergenic	-17857	ENSMUST00000200155.1	ENSMUST00000200155	ENSMUST00000200155	ENSMUSG00000106628	Gm43558	predicted gene 43558 [Source:MGI Symbol;Acc:MGI:5663695]	3	134063053	134063262	1
chrX_9742345_9743227	6.41772	3.1545	589.951	2.56814e-130	7.04153e-126	chrX 9742345 9743227	0.0567224	0.379866	0.143444	0.282759	21.5778	18.8847	19.3553	1	7	3	12	950	736	344	150999	chrX	9742346	9743227	+	Intergenic	Intergenic	-79783	ENSMUST00000154091.1	ENSMUST00000154091	ENSMUST00000154091	ENSMUSG00000031176	Dynlt3	dynein light chain Tctex-type 3 [Source:MGI Symbol;Acc:MGI:1914367]	X	9520506	9529242	-1
chr17_87787779_87788559	5.56344	3.31627	584.567	3.8081e-129	8.35307e-125	chr17 87787779 87788559	0.623947	0.434132	0.334702	0.471264	22.8725	22.6052	20.7056	11	8	7	20	1007	881	368	67751	chr17	87787780	87788559	+	intron (ENSMUST00000055221.8, intron 1 of 1)	-intron (ENSMUST00000055221.8, intron 1 of 1)	9825	ENSMUST00000055221.8	ENSMUST00000055221	ENSMUST00000055221	ENSMUSG00000050138	Kcnk12	potassium channel, subfamily K, member 12 [Source:MGI Symbol;Acc:MGI:2684043]	17	88053229	88105422	-1
chr9_99170334_99171320	5.71391	3.34971	559.996	8.42549e-124	1.54011e-119	chr9 99170334 99171320	0.510502	0.217066	0.430332	0.494828	23.8946	24.35	19.6366	9	4	9	21	1052	949	349	148825	chr9	99170335	99171320	+	Intergenic	Intergenic	-30206	ENSMUST00000124723.1	ENSMUST00000124723	ENSMUST00000124723	ENSMUSG00000032462	Pik3cb	phosphatidylinositol-4,5-bisphosphate 3-kinase catalytic subunit beta [Source:MGI Symbol;Acc:MGI:1922019]	9	98918707	99022674	-1
chr2_123911677_123912389	6.08991	2.95861	559.345	1.16686e-123	1.82821e-119	chr2 123911677 123912389	0.170167	0.1628	0.334702	0.282759	17.2623	17.3708	17.2734	3	3	7	12	760	677	307	85093	chr2	123911678	123912389	+	Intergenic	Intergenic	-177936	ENSMUST00000137172.1	ENSMUST00000137172	ENSMUST00000137172	ENSMUSG00000027200	Sema6d	sema domain, transmembrane domain (TM), and cytoplasmic domain, (semaphorin) 6D [Source:MGI Symbol;Acc:MGI:2387661]	2	123931889	124509690	1
chr1_13117882_13118873	4.80939	3.42095	534.636	2.76961e-118	3.79696e-114	chr1 13117882 13118873	0.907559	0.705465	0.956292	0.777586	22.1229	23.3749	24.7005	16	13	20	33	974	911	439	415	chr1	13117883	13118873	+	intron (ENSMUST00000047577.6, intron 6 of 7)	-intron (ENSMUST00000047577.6, intron 6 of 7)	8785	ENSMUST00000047577.6	ENSMUST00000047577	ENSMUST00000047577	ENSMUSG00000042414	Prdm14	PR domain containing 14 [Source:MGI Symbol;Acc:MGI:3588194]	1	13183681	13197387	-1
chr17_49029561_49030390	4.52177	3.62011	531.547	1.30145e-117	1.58596e-113	chr17 49029561 49030390	1.13445	1.24813	1.33881	0.989655	27.0064	27.5829	25.1506	20	23	28	42	1189	1075	447	65203	chr17	49029562	49030390	+	intron (ENSMUST00000046254.2, intron 1 of 2)	-intron (ENSMUST00000046254.2, intron 1 of 2)	66457	ENSMUST00000200509.1	ENSMUST00000200509	ENSMUST00000200509	NA	NA	NA	NA	NA	NA	NA
chr14_57656304_57657051	4.91663	3.257	524.015	5.66166e-116	6.20943e-112	chr14 57656304 57657051	0.680669	0.813998	0.62159	0.65977	21.8504	20.1933	20.5368	12	15	13	28	962	787	365	46137	chr14	57656305	57657051	+	intron (ENSMUST00000174694.7, intron 6 of 8)	-intron (ENSMUST00000089482.11, intron 1 of 22)	-8021	ENSMUST00000172647.1	ENSMUST00000172647	ENSMUST00000172647	ENSMUSG00000021952	Xpo4	exportin 4 [Source:MGI Symbol;Acc:MGI:1888526]	14	57814978	57902887	-1
chr10_71130115_71130761	5.18467	3.69899	523.12	8.86473e-116	8.83854e-112	chr10 71130115 71130761	0.453779	0.542665	1.24318	0.824713	30.0272	25.248	31.1147	8	10	26	35	1322	984	553	15287	chr10	71130116	71130761	+	intron (ENSMUST00000143791.7, intron 1 of 20)	-intron (ENSMUST00000014473.5, intron 1 of 21)	16422	ENSMUST00000131445.7	ENSMUST00000131445	ENSMUST00000131445	ENSMUSG00000014329	Bicc1	BicC family RNA binding protein 1 [Source:MGI Symbol;Acc:MGI:1933388]	10	70758662	70995530	-1
chr7_115605830_115606647	5.20791	2.9831	502.998	2.11653e-111	1.93442e-107	chr7 115605830 115606647	0.510502	0.542665	0.382517	0.447701	16.7171	17.807	17.4422	9	10	8	19	736	694	310	132709	chr7	115605831	115606647	+	intron (ENSMUST00000206573.1, intron 7 of 11)	-intron (ENSMUST00000072804.10, intron 7 of 16)	-8343	ENSMUST00000206775.1	ENSMUST00000206775	ENSMUST00000206775	ENSMUSG00000051910	Sox6	SRY (sex determining region Y)-box 6 [Source:MGI Symbol;Acc:MGI:98368]	7	115070107	115638031	-1
chr5_72491674_72492420	5.52633	3.30136	496.913	4.46418e-110	3.76622e-106	chr5 72491674 72492420	0.737391	0.325599	0.286888	0.518391	18.6478	24.8118	22.1685	13	6	6	22	821	967	394	111543	chr5	72491675	72492420	+	intron (ENSMUST00000177290.7, intron 1 of 20)	-intron (ENSMUST00000005352.9, intron 1 of 21)	5057	ENSMUST00000176972.1	ENSMUST00000176972	ENSMUST00000176972	ENSMUSG00000093771	AU023070	expressed sequence AU023070 [Source:MGI Symbol;Acc:MGI:3034643]	5	72653543	72654447	-1
chr1_87637205_87638043	5.36215	3.55236	491.911	5.46952e-109	4.28478e-105	chr1 87637205 87638043	0.907559	0.325599	0.382517	0.801149	29.9591	22.6052	25.4882	16	6	8	34	1319	881	453	4549	chr1	87637206	87638043	+	intron (ENSMUST00000169754.7, intron 2 of 26)	-intron (ENSMUST00000042275.14, intron 2 of 26)	15950	ENSMUST00000163576.1	ENSMUST00000163576	ENSMUST00000163576	ENSMUSG00000026288	Inpp5d	inositol polyphosphate-5-phosphatase D [Source:MGI Symbol;Acc:MGI:107357]	1	87548034	87648229	1
chr18_66222966_66223517	5.72752	2.81892	480.919	1.34798e-106	9.85601e-103	chr18 66222966 66223517	0.22689	0.271333	0.286888	0.329885	15.7632	16.9603	13.8413	4	5	6	14	694	661	246	71992	chr18	66222967	66223517	+	intron (ENSMUST00000146610.1, intron 1 of 9)	-intron (ENSMUST00000061103.13, intron 2 of 11)	-3909	ENSMUST00000102193.1	ENSMUST00000102193	ENSMUST00000102193	ENSMUSG00000076147	Mir694	microRNA 694 [Source:MGI Symbol;Acc:MGI:3629943]	18	66352335	66352404	-1
chr7_44433232_44433928	5.64193	2.78556	477.816	6.3819e-106	4.37459e-102	chr7 44433232 44433928	0.340335	0.108533	0.382517	0.329885	16.1039	14.6254	14.7978	6	2	8	14	709	570	263	128209	chr7	44433233	44433928	+	intron (ENSMUST00000127790.7, intron 1 of 2)	-intron (ENSMUST00000127790.7, intron 1 of 2)	4562	ENSMUST00000127790.7	ENSMUST00000127790	ENSMUST00000127790	ENSMUSG00000047085	Lrrc4b	leucine rich repeat containing 4B [Source:MGI Symbol;Acc:MGI:3027390]	7	44078442	44112775	1
chr6_39855477_39856086	6.13759	2.5853	473.962	4.401e-105	2.83929e-101	chr6 39855477 39856086	0.283612	0.217066	0.191258	0.117816	13.5145	13.2141	12.941	5	4	4	5	595	515	230	119732	chr6	39855478	39856086	+	Intergenic	Intergenic	-11487	ENSMUST00000201178.1	ENSMUST00000201178	ENSMUST00000201178	ENSMUSG00000106827	Gm7556	predicted gene 7556 [Source:MGI Symbol;Acc:MGI:3645467]	6	39820146	39821229	-1
chr13_97308295_97308956	6.87225	2.59618	473.838	4.68466e-105	2.85439e-101	chr13 97308295 97308956	0.0567224	0.0542665	0.191258	0.117816	14.0369	14.6254	11.4781	1	1	4	5	618	570	204	41361	chr13	97308296	97308956	+	Intergenic	Intergenic	25443	ENSMUST00000181148.2	ENSMUST00000181148	ENSMUST00000181148	ENSMUSG00000097932	C430039J16Rik	RIKEN cDNA C430039J16 gene [Source:MGI Symbol;Acc:MGI:1924873]	13	97419691	97422068	1
chr14_122992212_122993430	4.76639	3.33685	463.67	7.64187e-103	4.41117e-99	chr14 122992212 122993430	0.567224	1.1396	0.860663	0.706896	21.3053	20.142	24.7005	10	21	18	30	938	785	439	49603	chr14	122992213	122993430	+	Intergenic	Intergenic	-8786	ENSMUST00000141478.1	ENSMUST00000141478	ENSMUST00000141478	ENSMUSG00000041594	Tmtc4	transmembrane and tetratricopeptide repeat containing 4 [Source:MGI Symbol;Acc:MGI:1921050]	14	123156383	123221447	-1
chr3_153173382_153174104	5.64255	2.7543	461.689	2.06248e-102	1.13102e-98	chr3 153173382 153174104	0.22689	0.271333	0.430332	0.259195	13.4464	15.3951	15.8105	4	5	9	11	592	600	281	97831	chr3	153173383	153174104	+	intron (ENSMUST00000198047.4, intron 2 of 3)	-intron (ENSMUST00000197695.1, intron 1 of 2)	1667	ENSMUST00000197695.1	ENSMUST00000197695	ENSMUST00000197695	ENSMUSG00000105337	1700094M23Rik	RIKEN cDNA 1700094M23 gene [Source:MGI Symbol;Acc:MGI:1920829]	3	152868365	152888452	-1
chr18_36274306_36275389	4.40315	3.75192	450.563	5.43887e-100	2.71193e-96	chr18 36274306 36275389	1.58823	1.84506	1.00411	1.17816	30.05	31.8423	25.038	28	34	21	50	1323	1241	445	69927	chr18	36274307	36275389	+	Intergenic	Intergenic	-6249	ENSMUST00000051301.5	ENSMUST00000051301	ENSMUST00000051301	ENSMUSG00000043991	Pura	purine rich element binding protein A [Source:MGI Symbol;Acc:MGI:103079]	18	36414150	36425588	1
chr15_74539812_74540507	5.65884	3.43489	450.563	5.43993e-100	2.71193e-96	chr15 74539812 74540507	0.737391	0.596932	0.62159	0.164943	25.8025	25.3763	20.5931	13	11	13	7	1136	989	366	53261	chr15	74539813	74540507	+	promoter-TSS (ENSMUST00000189200.1)	#NAME?	-237	ENSMUST00000189200.1	ENSMUST00000189200	ENSMUST00000189200	ENSMUSG00000034730	Adgrb1	adhesion G protein-coupled receptor B1 [Source:MGI Symbol;Acc:MGI:1933736]	15	74388044	74461314	1
chr17_15228959_15229678	5.63391	2.74415	450.103	6.85184e-100	3.26729e-96	chr17 15228959 15229678	0.170167	0.271333	0.143444	0.447701	15.5815	14.3944	14.2914	3	5	3	19	686	561	254	62802	chr17	15228960	15229678	+	Intergenic	Intergenic	11464	ENSMUST00000181658.1	ENSMUST00000181658	ENSMUST00000181658	ENSMUSG00000097624	Gm5091	predicted gene 5091 [Source:MGI Symbol;Acc:MGI:3779456]	17	15451839	15468179	-1
chr3_119160427_119161043	5.14182	2.81884	447.909	2.05698e-99	9.39996e-96	chr3 119160427 119161043	0.567224	0.379866	0.334702	0.447701	14.9455	14.5484	16.8233	10	7	7	19	658	567	299	95753	chr3	119160428	119161043	+	intron (ENSMUST00000039177.11, intron 16 of 22)	-intron (ENSMUST00000039177.11, intron 16 of 22)	292491	ENSMUST00000197510.1	ENSMUST00000197510	ENSMUST00000197510	ENSMUSG00000106542	Gm43410	predicted gene 43410 [Source:MGI Symbol;Acc:MGI:5663547]	3	118661893	118664126	1
chr10_81464311_81465742	3.48566	4.41853	441.779	4.43879e-98	1.9473e-94	chr10 81464311 81465742	3.68696	4.23279	3.77736	4.02931	46.9715	48.8025	36.4036	65	78	79	171	2068	1902	647	16220	chr10	81464312	81465742	+	intron (ENSMUST00000238823.1, intron 9 of 11)	-intron (ENSMUST00000118763.7, intron 9 of 11)	3868	ENSMUST00000156926.1	ENSMUST00000156926	ENSMUST00000156926	ENSMUSG00000084849	Gm16105	predicted gene 16105 [Source:MGI Symbol;Acc:MGI:3801737]	10	81296993	81298806	1
chr8_113125886_113126542	6.33939	2.6499	438.763	2.01247e-97	8.48916e-94	chr8 113125886 113126542	0.113445	0.1628	0.0956292	0.235632	13.4237	12.0852	16.5983	2	3	2	10	591	471	295	141226	chr8	113125887	113126542	+	Intergenic	Intergenic	58952	ENSMUST00000212238.1	ENSMUST00000212238	ENSMUST00000212238	ENSMUSG00000110541	Gm10280	predicted gene 10280 [Source:MGI Symbol;Acc:MGI:3642651]	8	113793894	113819966	1
chr1_190316100_190316708	6.22193	2.47636	437.743	3.35399e-97	1.3624e-93	chr1 190316100 190316708	0.0567224	0.271333	0.0956292	0.188506	13.3555	12.1878	11.1405	1	5	2	8	588	475	198	10700	chr1	190316101	190316708	+	Intergenic	Intergenic	-87241	ENSMUST00000193966.1	ENSMUST00000193966	ENSMUST00000193966	ENSMUSG00000103644	Gm29678	predicted gene, 29678 [Source:MGI Symbol;Acc:MGI:5588837]	1	190135842	190149342	1
chr13_58536557_58537215	6.49718	2.93369	437.629	3.5521e-97	1.39135e-93	chr13 58536557 58537215	0.340335	0.217066	0.0956292	0.141379	19.5563	18.5768	12.5472	6	4	2	6	861	724	223	39442	chr13	58536558	58537215	+	Intergenic	Intergenic	-9142	ENSMUST00000223882.1	ENSMUST00000223882	ENSMUST00000223882	ENSMUSG00000114234	Gm3131	predicted gene 3131 [Source:MGI Symbol;Acc:MGI:3781308]	13	58693842	58694316	1
chr7_51692263_51692929	5.1817	2.86374	432.142	5.55495e-96	2.10082e-92	chr7 51692263 51692929	0.623947	0.325599	0.62159	0.282759	16.3537	14.8306	16.4857	11	6	13	12	720	578	293	128887	chr7	51692264	51692929	+	Intergenic	Intergenic	-5321	ENSMUST00000208341.1	ENSMUST00000208341	ENSMUST00000208341	ENSMUSG00000109331	Gm42402	predicted gene, 42402 [Source:MGI Symbol;Acc:MGI:5625287]	7	51347665	51348718	1
chrX_71915295_71915756	7.10898	2.24093	430.031	1.59974e-95	5.84838e-92	chrX 71915295 71915756	0.0567224	0.108533	0.143444	0.0235632	9.74409	10.9049	10.6904	1	2	3	1	429	425	190	152328	chrX	71915296	71915756	+	Intergenic	Intergenic	-5421	ENSMUST00000154780.9	ENSMUST00000154780	ENSMUST00000154780	ENSMUSG00000073130	Pasd1	PAS domain containing repressor 1 [Source:MGI Symbol;Acc:MGI:2685987]	X	70964553	70984476	1
chr10_86079807_86080451	6.09522	2.35913	427.298	6.29402e-95	2.22676e-91	chr10 86079807 86080451	0.170167	0.0542665	0.239073	0.164943	10.8798	11.2384	11.7594	3	1	5	7	479	438	209	16602	chr10	86079808	86080451	+	intron (ENSMUST00000145864.7, intron 8 of 8)	-intron (ENSMUST00000120638.7, intron 8 of 13)	-13286	ENSMUST00000143319.1	ENSMUST00000143319	ENSMUST00000143319	ENSMUSG00000059602	Syn3	synapsin III [Source:MGI Symbol;Acc:MGI:1351334]	10	85890989	86334760	-1
chr10_88365501_88366162	5.32575	2.85201	425.299	1.71437e-94	5.87574e-91	chr10 88365501 88366162	0.453779	0.271333	0.62159	0.282759	17.2623	16.1905	13.7287	8	5	13	12	760	631	244	16761	chr10	88365502	88366162	+	intron (ENSMUST00000138159.1, intron 1 of 3)	-intron (ENSMUST00000138159.1, intron 1 of 3)	-8757	ENSMUST00000020249.1	ENSMUST00000020249	ENSMUST00000020249	ENSMUSG00000020057	Dram1	DNA-damage regulated autophagy modulator 1 [Source:MGI Symbol;Acc:MGI:1918962]	10	88158666	88214942	-1
chr17_50209722_50210464	5.28519	2.65692	424.336	2.77805e-94	9.23282e-91	chr17 50209722 50210464	0.340335	0.379866	0.239073	0.400575	13.5145	12.7523	15.1916	6	7	5	17	595	497	270	65286	chr17	50209723	50210464	+	promoter-TSS (ENSMUST00000194498.2)	#NAME?	-42	ENSMUST00000194498.2	ENSMUST00000194498	ENSMUST00000194498	ENSMUSG00000104256	Gm37173	predicted gene, 37173 [Source:MGI Symbol;Acc:MGI:5610401]	17	50517163	50526670	1
chr3_46722083_46722739	5.25908	3.30455	423.531	4.15725e-94	1.34102e-90	chr3 46722083 46722739	0.453779	0.488399	0.478146	0.73046	19.1248	18.9617	27.8513	8	9	10	31	842	739	495	91432	chr3	46722084	46722739	+	Intergenic	Intergenic	101290	ENSMUST00000195318.1	ENSMUST00000195318	ENSMUST00000195318	ENSMUSG00000102589	Gm37445	predicted gene, 37445 [Source:MGI Symbol;Acc:MGI:5610673]	3	46575556	46575797	1
chr13_69679152_69679967	6.1983	2.5407	420.129	2.28716e-93	7.16697e-90	chr13 69679152 69679967	0.22689	0.108533	0.191258	0.164943	11.4703	11.9825	15.4167	4	2	4	7	505	467	274	40060	chr13	69679153	69679967	+	Intergenic	Intergenic	-10616	ENSMUST00000221036.1	ENSMUST00000221036	ENSMUST00000221036	ENSMUSG00000114171	Gm18313	predicted gene, 18313 [Source:MGI Symbol;Acc:MGI:5010498]	13	69814837	69817063	-1
chr11_7213304_7214324	4.68335	3.24538	417.339	9.26251e-93	2.82185e-89	chr11 7213304 7214324	0.737391	0.596932	0.765034	0.966092	20.374	23.8624	17.2734	13	11	16	41	897	930	307	20028	chr11	7213305	7214324	+	promoter-TSS (ENSMUST00000020702.10)	#NAME?	83	ENSMUST00000020702.10	ENSMUST00000020702	ENSMUST00000020702	ENSMUSG00000020427	Igfbp3	insulin-like growth factor binding protein 3 [Source:MGI Symbol;Acc:MGI:96438]	11	7156086	7163923	-1
chr12_75927509_75928159	5.71806	2.44167	416.165	1.66758e-92	4.94304e-89	chr12 75927509 75928159	0.113445	0.217066	0.334702	0.212069	12.6968	11.726	11.1405	2	4	7	9	559	457	198	32496	chr12	75927510	75928159	+	intron (ENSMUST00000143031.7, intron 27 of 114)	-intron (ENSMUST00000044217.15, intron 27 of 115)	18616	ENSMUST00000124685.1	ENSMUST00000124685	ENSMUST00000124685	ENSMUSG00000063450	Syne2	spectrin repeat containing, nuclear envelope 2 [Source:MGI Symbol;Acc:MGI:2449316]	12	75864908	76157700	1
chr16_96969433_96970237	5.01921	3.23727	414.907	3.1339e-92	9.04501e-89	chr16 96969433 96970237	0.794114	0.271333	0.956292	0.541954	23.5312	20.6038	17.4985	14	5	20	23	1036	803	311	61815	chr16	96969434	96970237	+	intron (ENSMUST00000056102.8, intron 3 of 32)	-intron (ENSMUST00000056102.8, intron 3 of 32)	51078	ENSMUST00000232718.1	ENSMUST00000232718	ENSMUST00000232718	ENSMUSG00000117324	Gm32432	predicted gene, 32432 [Source:MGI Symbol;Acc:MGI:5591591]	16	96719932	96723360	1
chr2_172889584_172890265	5.70912	2.6745	414.612	3.63321e-92	1.02173e-88	chr2 172889584 172890265	0.397057	0.217066	0.239073	0.235632	16.4673	13.1885	12.2096	7	4	5	10	725	514	217	89076	chr2	172889585	172890265	+	intron (ENSMUST00000009143.7, intron 3 of 6)	-intron (ENSMUST00000009143.7, intron 3 of 6)	-25584	ENSMUST00000175419.1	ENSMUST00000175419	ENSMUST00000175419	NA	NA	NA	NA	NA	NA	NA
chr8_35216035_35216733	5.6045	2.61205	413.592	6.05564e-92	1.66038e-88	chr8 35216035 35216733	0.22689	0.217066	0.334702	0.282759	14.6502	14.1122	11.1968	4	4	7	12	645	550	199	136718	chr8	35216036	35216733	+	Intergenic	Intergenic	-2254	ENSMUST00000209645.1	ENSMUST00000209645	ENSMUST00000209645	ENSMUSG00000109773	Gm34474	predicted gene, 34474 [Source:MGI Symbol;Acc:MGI:5593633]	8	35685792	35689225	1
chr13_10732490_10733162	4.59931	2.93279	411.387	1.829e-91	4.89258e-88	chr13 10732490 10733162	0.680669	0.434132	0.908478	0.65977	15.1953	16.755	17.4422	12	8	19	28	669	653	310	36121	chr13	10732491	10733162	+	intron (ENSMUST00000222633.1, intron 9 of 10)	-intron (ENSMUST00000220536.1, intron 6 of 7)	-2095	ENSMUST00000222084.1	ENSMUST00000222084	ENSMUST00000222084	ENSMUSG00000097009	Gm26861	predicted gene, 26861 [Source:MGI Symbol;Acc:MGI:5477355]	13	10407631	10847538	1
chr4_11847944_11848638	5.23172	2.51829	410.434	2.94954e-91	7.70216e-88	chr4 11847944 11848638	0.170167	0.325599	0.334702	0.400575	12.2426	12.8549	12.2658	3	6	7	17	539	501	218	98753	chr4	11847945	11848638	+	Intergenic	Intergenic	-80133	ENSMUST00000122569.1	ENSMUST00000122569	ENSMUST00000122569	NA	NA	NA	NA	NA	NA	NA
chr7_111879887_111880486	5.96666	2.4613	405.097	4.28008e-90	1.09167e-86	chr7 111879887 111880486	0.0567224	0.217066	0.191258	0.235632	12.9013	13.0089	10.184	1	4	4	10	568	507	181	132350	chr7	111879888	111880486	+	Intergenic	Intergenic	-21632	ENSMUST00000211213.1	ENSMUST00000211213	ENSMUST00000211213	ENSMUSG00000110065	Gm45588	predicted gene 45588 [Source:MGI Symbol;Acc:MGI:5791424]	7	111457133	111457762	-1
chr14_82159055_82159904	4.72754	3.1463	404.759	5.0697e-90	1.26368e-86	chr14 82159055 82159904	0.680669	0.488399	0.812849	0.824713	16.967	17.8583	23.1813	12	9	17	35	747	696	412	47991	chr14	82159056	82159904	+	Intergenic	Intergenic	-16902	ENSMUST00000228751.1	ENSMUST00000228751	ENSMUST00000228751	ENSMUSG00000115825	Gm49048	predicted gene, 49048 [Source:MGI Symbol;Acc:MGI:6118424]	14	82377563	82380018	-1
chr7_66789901_66790724	5.10839	2.81107	403.725	8.51375e-90	2.07499e-86	chr7 66789901 66790724	0.510502	0.217066	0.286888	0.612644	14.6729	17.0116	14.1788	9	4	6	26	646	663	252	129567	chr7	66789902	66790724	+	intron (ENSMUST00000208521.1, intron 8 of 9)	-intron (ENSMUST00000066475.10, intron 9 of 10)	26144	ENSMUST00000208521.1	ENSMUST00000208521	ENSMUST00000208521	ENSMUSG00000030510	Cers3	ceramide synthase 3 [Source:MGI Symbol;Acc:MGI:2681008]	7	66393252	66473439	1
chr17_56065278_56066271	4.27815	3.33686	402.752	1.38616e-89	3.30494e-86	chr17 56065278 56066271	1.47478	0.922531	0.717219	1.27241	20.5103	20.7578	23.7439	26	17	15	54	903	809	422	65526	chr17	56065279	56066271	+	intron (ENSMUST00000233325.1, intron 9 of 10)	-intron (ENSMUST00000002914.9, intron 13 of 13)	3659	ENSMUST00000134441.1	ENSMUST00000134441	ENSMUST00000134441	ENSMUSG00000019578	Ubxn6	UBX domain protein 6 [Source:MGI Symbol;Acc:MGI:1913780]	17	56374045	56382028	-1
chr15_27303962_27304793	5.21798	2.987	397.911	1.56939e-88	3.66219e-85	chr15 27303962 27304793	0.22689	0.379866	0.812849	0.424138	15.2862	16.3702	20.8182	4	7	17	18	673	638	370	50589	chr15	27303963	27304793	+	Intergenic	Intergenic	-63561	ENSMUST00000227785.1	ENSMUST00000227785	ENSMUST00000227785	ENSMUSG00000115554	Gm19111	predicted gene, 19111 [Source:MGI Symbol;Acc:MGI:5011296]	15	27368025	27369527	1
chr1_13040567_13041393	4.78737	2.97566	395.628	4.92876e-88	1.12617e-84	chr1 13040567 13041393	0.453779	0.922531	0.286888	0.73046	16.172	16.3702	18.7926	8	17	6	31	712	638	334	403	chr1	13040568	13041393	+	Intergenic	Intergenic	18971	ENSMUST00000191708.1	ENSMUST00000191708	ENSMUST00000191708	ENSMUSG00000104518	Gm37162	predicted gene, 37162 [Source:MGI Symbol;Acc:MGI:5610390]	1	13129625	13130175	-1
chr7_64586445_64587044	5.76938	2.41493	394.242	9.87281e-88	2.2098e-84	chr7 64586445 64587044	0.340335	0.108533	0.143444	0.235632	10.6299	11.3411	13.2786	6	2	3	10	468	442	236	129356	chr7	64586446	64587044	+	intron (ENSMUST00000205613.1, intron 2 of 2)	-intron (ENSMUST00000032732.14, intron 2 of 14)	-48286	ENSMUST00000206246.1	ENSMUST00000206246	ENSMUST00000206246	ENSMUSG00000030519	Apba2	amyloid beta precursor protein binding family A member 2 [Source:MGI Symbol;Acc:MGI:1261791]	7	64151454	64403626	1
chr6_115938679_115939729	5.34542	2.95679	387.679	2.65009e-86	5.81298e-83	chr6 115938679 115939729	0.283612	0.813998	0.382517	0.282759	20.1242	16.1649	14.5164	5	15	8	12	886	630	258	124002	chr6	115938680	115939729	+	exon (ENSMUST00000032471.8, exon 5 of 5)	-exon (ENSMUST00000032471.8, exon 5 of 5)	-2678	ENSMUST00000203894.1	ENSMUST00000203894	ENSMUST00000203894	ENSMUSG00000107548	Gm43866	predicted gene, 43866 [Source:MGI Symbol;Acc:MGI:5690258]	6	115912649	115913487	-1
chr12_5386604_5387181	5.37416	2.45358	386.249	5.42556e-86	1.16676e-82	chr12 5386604 5387181	0.113445	0.379866	0.382517	0.259195	12.0382	12.8549	10.6904	2	7	8	11	530	501	190	28982	chr12	5386605	5387181	+	intron (ENSMUST00000037953.6, intron 1 of 1)	-intron (ENSMUST00000037953.6, intron 1 of 1)	11023	ENSMUST00000037953.6	ENSMUST00000037953	ENSMUST00000037953	ENSMUSG00000037735	2810032G03Rik	RIKEN cDNA 2810032G03 gene [Source:MGI Symbol;Acc:MGI:1919919]	12	5425870	5466631	1
chr8_119391839_119392453	5.51728	2.6149	386.024	6.07371e-86	1.28103e-82	chr8 119391839 119392453	0.453779	0.108533	0.478146	0.188506	14.6048	13.753	11.5906	8	2	10	8	643	536	206	141604	chr8	119391840	119392453	+	Intergenic	Intergenic	-2732	ENSMUST00000098367.4	ENSMUST00000098367	ENSMUST00000098367	ENSMUSG00000074064	Mlycd	malonyl-CoA decarboxylase [Source:MGI Symbol;Acc:MGI:1928485]	8	120121617	120137841	1
chr6_120682791_120683627	4.99104	2.53848	384.982	1.02389e-85	2.11877e-82	chr6 120682791 120683627	0.340335	0.596932	0.430332	0.282759	13.083	12.1878	12.2658	6	11	9	12	576	475	218	124412	chr6	120682792	120683627	+	intron (ENSMUST00000148346.1, intron 1 of 1)	-intron (ENSMUST00000100993.8, intron 1 of 18)	16627	ENSMUST00000100993.8	ENSMUST00000100993	ENSMUST00000100993	ENSMUSG00000071226	Cecr2	CECR2, histone acetyl-lysine reader [Source:MGI Symbol;Acc:MGI:1923799]	6	120643330	120748151	1
chr13_75874905_75875687	4.6795	2.73852	383.101	2.62879e-85	5.33913e-82	chr13 75874905 75875687	0.907559	0.325599	0.478146	0.541954	13.9688	14.2918	14.7978	16	6	10	23	615	557	263	40434	chr13	75874906	75875687	+	intron (ENSMUST00000222923.1, intron 2 of 3)	-intron (ENSMUST00000022078.11, intron 11 of 11)	2099	ENSMUST00000222923.1	ENSMUST00000222923	ENSMUST00000222923	ENSMUSG00000021589	Rhobtb3	Rho-related BTB domain containing 3 [Source:MGI Symbol;Acc:MGI:1920546]	13	76017656	76092044	-1
chr6_89286521_89287232	3.64772	3.50672	381.007	7.51013e-85	1.49759e-81	chr6 89286521 89287232	2.15545	1.3024	2.00821	1.97931	23.3268	23.4519	23.9127	38	24	42	84	1027	914	425	122346	chr6	89286522	89287232	+	Intergenic	Intergenic	-1152	ENSMUST00000203704.1	ENSMUST00000203704	ENSMUST00000203704	ENSMUSG00000107622	4930512J16Rik	RIKEN cDNA 4930512J16 gene [Source:MGI Symbol;Acc:MGI:1922381]	6	89246493	89262707	-1
chr2_179884351_179885066	4.9137	3.09784	380.691	8.79994e-85	1.72345e-81	chr2 179884351 179885066	0.907559	0.434132	0.478146	0.636207	20.7829	20.4755	14.2914	16	8	10	27	915	798	254	89453	chr2	179884352	179885066	+	intron (ENSMUST00000000314.12, intron 9 of 15)	-intron (ENSMUST00000000314.12, intron 9 of 15)	-9175	ENSMUST00000129659.1	ENSMUST00000129659	ENSMUST00000129659	ENSMUSG00000000305	Cdh4	cadherin 4 [Source:MGI Symbol;Acc:MGI:99218]	2	179084224	179541166	1
chr17_49432216_49432724	4.81843	2.60124	379.104	1.9497e-84	3.75147e-81	chr17 49432216 49432724	0.567224	0.488399	0.239073	0.518391	12.1971	13.2141	13.8975	10	9	5	22	537	515	247	65230	chr17	49432217	49432724	+	promoter-TSS (ENSMUST00000174268.1)	#NAME?	-726	ENSMUST00000174268.1	ENSMUST00000174268	ENSMUST00000174268	ENSMUSG00000064120	Mocs1	molybdenum cofactor synthesis 1 [Source:MGI Symbol;Acc:MGI:1928904]	17	49735390	49762463	1
chr1_124311096_124311941	4.63035	3.30003	378.794	2.27802e-84	4.30762e-81	chr1 124311096 124311941	0.850836	0.596932	0.525961	1.24885	22.2592	18.7051	23.3501	15	11	11	53	980	729	415	6052	chr1	124311097	124311941	+	intron (ENSMUST00000239072.1, intron 1 of 25)	-intron (ENSMUST00000239072.1, intron 1 of 25)	67723	ENSMUST00000195141.1	ENSMUST00000195141	ENSMUST00000195141	ENSMUSG00000103914	Gm38073	predicted gene, 38073 [Source:MGI Symbol;Acc:MGI:5611301]	1	124303315	124306979	-1
chr3_63317338_63318234	4.38134	3.38209	378.447	2.71055e-84	5.03864e-81	chr3 63317338 63318234	0.794114	1.4652	0.669405	1.27241	20.9646	20.5782	25.9946	14	27	14	54	923	802	462	92400	chr3	63317339	63318234	+	intron (ENSMUST00000191633.5, intron 3 of 5)	-intron (ENSMUST00000029400.6, intron 3 of 22)	17626	ENSMUST00000193805.1	ENSMUST00000193805	ENSMUST00000193805	ENSMUSG00000027820	Mme	membrane metallo endopeptidase [Source:MGI Symbol;Acc:MGI:97004]	3	63148958	63293451	1
chr4_154785256_154785808	6.1538	2.35292	378.274	2.95683e-84	5.40483e-81	chr4 154785256 154785808	0.170167	0.325599	0.0478146	0.117816	11.9927	12.1365	9.22751	3	6	1	5	528	473	164	107648	chr4	154785257	154785808	+	Intergenic	Intergenic	-51927	ENSMUST00000207854.1	ENSMUST00000207854	ENSMUST00000207854	ENSMUSG00000046637	Ttc34	tetratricopeptide repeat domain 34 [Source:MGI Symbol;Acc:MGI:2445205]	4	154921916	154951584	1
chr19_57954036_57954581	5.88257	2.27877	375.542	1.16321e-83	2.0914e-80	chr19 57954036 57954581	0.283612	0.379866	0.0478146	0.0942529	10.9933	10.443	10.2403	5	7	1	4	484	407	182	77466	chr19	57954037	57954581	+	intron (ENSMUST00000077282.6, intron 27 of 28)	-intron (ENSMUST00000077282.6, intron 27 of 28)	-96858	ENSMUST00000176631.1	ENSMUST00000176631	ENSMUST00000176631	ENSMUSG00000093757	Mir5623	microRNA 5623 [Source:MGI Symbol;Acc:MGI:5455845]	19	58039599	58039668	1
chr10_76968059_76968635	5.96488	2.51032	375.351	1.27986e-83	2.26402e-80	chr10 76968059 76968635	0.22689	0.325599	0.191258	0.117816	13.9007	13.5477	9.73389	4	6	4	5	612	528	173	15692	chr10	76968060	76968635	+	intron (ENSMUST00000220294.1, intron 3 of 4)	-intron (ENSMUST00000220294.1, intron 3 of 4)	-6460	ENSMUST00000105411.8	ENSMUST00000105411	ENSMUST00000105411	ENSMUSG00000001120	Pcbp3	poly(rC) binding protein 3 [Source:MGI Symbol;Acc:MGI:1890470]	10	76597691	76797721	-1
chr9_119653581_119654214	5.8115	2.44629	373.37	3.45445e-83	6.01376e-80	chr9 119653581 119654214	0.340335	0.325599	0.191258	0.0942529	12.6968	12.8293	9.95895	6	6	4	4	559	500	177	150351	chr9	119653582	119654214	+	intron (ENSMUST00000216583.1, intron 10 of 11)	-intron (ENSMUST00000084787.5, intron 13 of 27)	34141	ENSMUST00000216583.1	ENSMUST00000216583	ENSMUST00000216583	ENSMUSG00000034533	Scn10a	sodium channel, voltage-gated, type X, alpha [Source:MGI Symbol;Acc:MGI:108029]	9	119437522	119548388	-1
chr18_83484642_83486021	5.85823	2.48498	372.692	4.85268e-83	8.3159e-80	chr18 83484642 83486021	0.170167	0.271333	0.382517	0.0942529	14.2868	11.5977	10.6904	3	5	8	4	629	452	190	73161	chr18	83484643	83486021	+	Intergenic	Intergenic	3190	ENSMUST00000236581.1	ENSMUST00000236581	ENSMUST00000236581	ENSMUSG00000118156	Gm7569	predicted gene 7569 [Source:MGI Symbol;Acc:MGI:3649158]	18	83506137	83506647	-1
chr4_140810491_140811124	5.62651	2.84924	372.451	5.47741e-83	9.24208e-80	chr4 140810491 140811124	0.510502	0.434132	0.334702	0.141379	17.9891	16.9346	12.2096	9	8	7	6	792	660	217	106513	chr4	140810492	140811124	+	promoter-TSS (ENSMUST00000026377.8)	#NAME?	-160	ENSMUST00000026377.8	ENSMUST00000026377	ENSMUST00000026377	ENSMUSG00000025328	Padi3	peptidyl arginine deiminase, type III [Source:MGI Symbol;Acc:MGI:1338891]	4	140512676	140537959	-1
chr6_124785272_124786048	5.21277	2.32438	371.026	1.11914e-82	1.85972e-79	chr6 124785272 124786048	0.113445	0.379866	0.239073	0.353448	10.9706	10.8792	10.6341	2	7	5	15	483	424	189	124690	chr6	124785273	124786048	+	Intergenic	Intergenic	-5933	ENSMUST00000112475.8	ENSMUST00000112475	ENSMUST00000112475	ENSMUSG00000030125	Lrrc23	leucine rich repeat containing 23 [Source:MGI Symbol;Acc:MGI:1315192]	6	124746826	124756690	-1
chr17_67847643_67848217	5.50374	2.29174	370.851	1.22123e-82	1.99908e-79	chr17 67847643 67848217	0.113445	0.217066	0.334702	0.235632	10.0394	10.1864	11.872	2	4	7	10	442	397	211	66226	chr17	67847644	67848217	+	intron (ENSMUST00000164647.7, intron 17 of 17)	-intron (ENSMUST00000024840.11, intron 17 of 17)	3133	ENSMUST00000166414.1	ENSMUST00000166414	ENSMUST00000166414	ENSMUSG00000090955	Gm17097	predicted gene 17097 [Source:MGI Symbol;Acc:MGI:4937924]	17	68157121	68158058	-1
chr8_125397826_125398485	5.81893	2.34965	369.602	2.28433e-82	3.68432e-79	chr8 125397826 125398485	0.170167	0.217066	0.239073	0.164943	12.0609	12.0595	9.00244	3	4	5	7	531	470	160	142342	chr8	125397827	125398485	+	Intergenic	Intergenic	94554	ENSMUST00000108775.1	ENSMUST00000108775	ENSMUST00000108775	ENSMUSG00000001995	Sipa1l2	signal-induced proliferation-associated 1 like 2 [Source:MGI Symbol;Acc:MGI:2676970]	8	126144802	126296547	-1
chr1_13939967_13940934	4.8472	2.58255	369.36	2.57892e-82	4.09917e-79	chr1 13939967 13940934	0.510502	0.108533	0.525961	0.541954	13.4237	12.3931	12.941	9	2	11	23	591	483	230	508	chr1	13939968	13940934	+	Intergenic	Intergenic	8073	ENSMUST00000158733.1	ENSMUST00000158733	ENSMUST00000158733	NA	NA	NA	NA	NA	NA	NA
chr2_170529655_170530250	5.48069	2.3122	368.358	4.26392e-82	6.68066e-79	chr2 170529655 170530250	0.170167	0.0542665	0.334702	0.306322	11.175	11.3154	9.79016	3	1	7	13	492	441	174	88951	chr2	170529656	170530250	+	Intergenic	Intergenic	15063	ENSMUST00000139328.1	ENSMUST00000139328	ENSMUST00000139328	ENSMUSG00000052033	Pfdn4	prefoldin 4 [Source:MGI Symbol;Acc:MGI:1923512]	2	170338348	170361043	1
chr2_109868650_109869395	5.515	2.22601	368.049	4.97638e-82	7.68711e-79	chr2 109868650 109869395	0.113445	0.217066	0.191258	0.282759	9.38068	10.6483	10.5216	2	4	4	12	413	415	187	84213	chr2	109868651	109869395	+	Intergenic	Intergenic	-21830	ENSMUST00000028583.7	ENSMUST00000028583	ENSMUST00000028583	ENSMUSG00000027162	Lin7c	lin-7 homolog C, crumbs cell polarity complex component [Source:MGI Symbol;Acc:MGI:1330839]	2	109721198	109731348	1
chr16_51681134_51681690	6.12593	2.33296	366.835	9.14733e-82	1.39338e-78	chr16 51681134 51681690	0.283612	0.108533	0.239073	0.0706896	10.7662	9.57064	13.0535	5	2	5	3	474	373	232	59645	chr16	51681135	51681690	+	Intergenic	Intergenic	-264464	ENSMUST00000232313.1	ENSMUST00000232313	ENSMUST00000232313	ENSMUSG00000116855	Gm49608	predicted gene, 49608 [Source:MGI Symbol;Acc:MGI:6215024]	16	51236997	51237311	-1
chr10_13014872_13015585	4.65898	2.75942	364.735	2.62145e-81	3.93846e-78	chr10 13014872 13015585	0.567224	0.705465	0.239073	0.706896	14.9001	13.3681	15.5292	10	13	5	30	656	521	276	11730	chr10	13014873	13015585	+	Intergenic	Intergenic	9886	ENSMUST00000105139.4	ENSMUST00000105139	ENSMUST00000105139	ENSMUSG00000078348	Sf3b5	splicing factor 3b, subunit 5 [Source:MGI Symbol;Acc:MGI:1913375]	10	12881087	12884927	1
chr4_148830206_148830711	4.48269	3.01953	363.64	4.53981e-81	6.72842e-78	chr4 148830206 148830711	0.737391	0.596932	1.09974	0.683333	18.7386	18.8847	14.2351	13	11	23	29	825	736	253	106972	chr4	148830207	148830711	+	intron (ENSMUST00000128881.1, intron 1 of 1)	-intron (ENSMUST00000094464.9, intron 1 of 15)	25994	ENSMUST00000128881.1	ENSMUST00000128881	ENSMUST00000128881	ENSMUSG00000028977	Casz1	castor zinc finger 1 [Source:MGI Symbol;Acc:MGI:1196251]	4	148888886	149039346	1
chr10_122413670_122414277	5.89987	2.19152	363.414	5.08401e-81	7.43452e-78	chr10 122413670 122414277	0.283612	0.108533	0.143444	0.141379	10.2438	10.8536	8.55232	5	2	3	6	451	423	152	18979	chr10	122413671	122414277	+	intron (ENSMUST00000218285.1, intron 2 of 2)	-intron (ENSMUST00000218285.1, intron 2 of 2)	27082	ENSMUST00000218971.1	ENSMUST00000218971	ENSMUST00000218971	ENSMUSG00000112774	Gm36041	predicted gene, 36041 [Source:MGI Symbol;Acc:MGI:5595200]	10	122222797	122270938	1
chr7_75868355_75869132	4.08865	3.13273	362.36	8.62228e-81	1.24427e-77	chr7 75868355 75869132	1.13445	0.596932	1.38662	1.1546	18.7841	19.7314	16.9921	20	11	29	49	827	769	302	130121	chr7	75868356	75869132	+	intron (ENSMUST00000171155.3, intron 2 of 2)	-intron (ENSMUST00000092073.10, intron 2 of 2)	20303	ENSMUST00000205887.1	ENSMUST00000205887	ENSMUST00000205887	ENSMUSG00000055652	Klhl25	kelch-like 25 [Source:MGI Symbol;Acc:MGI:2668031]	7	75498058	75523879	1
chr4_43326932_43327562	5.92882	2.26809	361.864	1.10614e-80	1.57553e-77	chr4 43326932 43327562	0.113445	0.1628	0.0956292	0.235632	11.6066	11.0845	8.66485	2	3	2	10	511	432	154	99942	chr4	43326933	43327562	+	TTS (ENSMUST00000102953.3)	#NAME?	-54732	ENSMUST00000035645.11	ENSMUST00000035645	ENSMUST00000035645	ENSMUSG00000035969	Rusc2	RUN and SH3 domain containing 2 [Source:MGI Symbol;Acc:MGI:2140371]	4	43381979	43427088	1
chr10_45237497_45238453	4.67367	2.54923	361.561	1.28747e-80	1.8103e-77	chr10 45237497 45238453	0.340335	0.488399	0.717219	0.424138	11.7202	13.0089	12.8847	6	9	15	18	516	507	229	13784	chr10	45237498	45238453	+	intron (ENSMUST00000175658.1, intron 2 of 2)	-intron (ENSMUST00000175658.1, intron 2 of 2)	-9112	ENSMUST00000157398.2	ENSMUST00000157398	ENSMUST00000157398	ENSMUSG00000118733	Gm55150	predicted gene, 55150 [Source:MGI Symbol;Acc:MGI:6846773]	10	45123183	45123245	1
chr10_11410854_11411437	5.13413	2.30827	360.978	1.72447e-80	2.39407e-77	chr10 11410854 11411437	0.113445	0.434132	0.286888	0.329885	11.1523	10.597	10.2403	2	8	6	14	491	413	182	11617	chr10	11410855	11411437	+	intron (ENSMUST00000069106.4, intron 2 of 3)	-intron (ENSMUST00000069106.4, intron 2 of 3)	-23543	ENSMUST00000161946.1	ENSMUST00000161946	ENSMUST00000161946	ENSMUSG00000090242	Rpl17-ps11	ribosomal protein L17, pseudogene 11 [Source:MGI Symbol;Acc:MGI:3802112]	10	11262619	11263347	-1
chr4_82300960_82301570	4.88151	2.58628	358.81	5.11327e-80	7.00997e-77	chr4 82300960 82301570	0.680669	0.1628	0.525961	0.400575	11.652	13.3938	13.8975	12	3	11	17	513	522	247	101885	chr4	82300961	82301570	+	intron (ENSMUST00000064770.8, intron 8 of 8)	-intron (ENSMUST00000050872.14, intron 11 of 11)	-138145	ENSMUST00000122646.1	ENSMUST00000122646	ENSMUST00000122646	NA	NA	NA	NA	NA	NA	NA
chr2_105028091_105028975	5.07826	2.41143	358.776	5.20088e-80	7.04206e-77	chr2 105028091 105028975	0.567224	0.217066	0.334702	0.282759	11.1523	10.7509	12.6597	10	4	7	12	491	419	225	83989	chr2	105028092	105028975	+	Intergenic	Intergenic	3754	ENSMUST00000119148.1	ENSMUST00000119148	ENSMUST00000119148	ENSMUSG00000083487	Gm13888	predicted gene 13888 [Source:MGI Symbol;Acc:MGI:3651975]	2	104862211	104862632	-1
chr4_116663232_116663803	5.11393	2.45891	358.587	5.71946e-80	7.64978e-77	chr4 116663232 116663803	0.340335	0.488399	0.0956292	0.400575	12.4243	12.5214	10.5779	6	9	2	17	547	488	188	103894	chr4	116663233	116663803	+	Intergenic	Intergenic	-10635	ENSMUST00000083251.1	ENSMUST00000083251	ENSMUST00000083251	ENSMUSG00000065185	Gm25137	predicted gene, 25137 [Source:MGI Symbol;Acc:MGI:5454914]	4	116531350	116531459	1
chrX_135243676_135244456	5.48736	2.09571	356.526	1.60705e-79	2.12353e-76	chrX 135243676 135244456	0.170167	0.217066	0.239073	0.188506	8.92641	9.10878	9.73389	3	4	5	8	393	355	173	153460	chrX	135243677	135244456	+	Intergenic	Intergenic	3912	ENSMUST00000122074.1	ENSMUST00000122074	ENSMUST00000122074	ENSMUSG00000081709	Gm15022	predicted gene 15022 [Source:MGI Symbol;Acc:MGI:3782930]	X	134140903	134141648	1
chr2_81696051_81696722	4.88882	3.43024	356.334	1.76951e-79	2.31036e-76	chr2 81696051 81696722	0.567224	0.813998	0.525961	1.10747	20.8283	19.8084	30.7771	10	15	11	47	917	772	547	82884	chr2	81696052	81696722	+	Intergenic	Intergenic	-153045	ENSMUST00000157569.1	ENSMUST00000157569	ENSMUST00000157569	NA	NA	NA	NA	NA	NA	NA
chr14_70798346_70799180	4.86277	2.74831	356.232	1.86276e-79	2.40351e-76	chr14 70798346 70799180	0.794114	0.434132	0.669405	0.259195	15.2635	13.7017	14.4602	14	8	14	11	672	534	257	47184	chr14	70798347	70799180	+	Intergenic	Intergenic	22053	ENSMUST00000164691.1	ENSMUST00000164691	ENSMUST00000164691	ENSMUSG00000022102	Dok2	docking protein 2 [Source:MGI Symbol;Acc:MGI:1332623]	14	71003476	71015935	1
chr14_16173140_16173746	5.37802	2.34979	354.636	4.14572e-79	5.287e-76	chr14 16173140 16173746	0.283612	0.379866	0.143444	0.259195	11.493	9.468	12.3784	5	7	3	11	506	369	220	43566	chr14	16173141	16173746	+	TTS (ENSMUST00000225492.1)	#NAME?	2046	ENSMUST00000225492.1	ENSMUST00000225492	ENSMUST00000225492	ENSMUSG00000114484	Gm8517	predicted gene 8517 [Source:MGI Symbol;Acc:MGI:3648238]	14	6297155	6298366	-1
chr17_56651734_56652319	4.56822	2.74278	354.001	5.70098e-79	7.18684e-76	chr17 56651734 56652319	0.623947	0.759731	0.334702	0.65977	13.8098	16.2162	12.8285	11	14	7	28	608	632	228	65609	chr17	56651735	56652319	+	intron (ENSMUST00000233947.1, intron 1 of 11)	-intron (ENSMUST00000112979.3, intron 10 of 21)	245	ENSMUST00000233947.1	ENSMUST00000233947	ENSMUST00000233947	ENSMUSG00000040828	Catsperd	cation channel sperm associated auxiliary subunit delta [Source:MGI Symbol;Acc:MGI:2147030]	17	56935143	56971456	1
chr11_49624272_49624991	5.39216	2.34285	353.936	5.88876e-79	7.3392e-76	chr11 49624272 49624991	0.22689	0.217066	0.239073	0.306322	11.4703	9.28839	12.4909	4	4	5	13	505	362	222	22016	chr11	49624273	49624991	+	intron (ENSMUST00000152253.1, intron 1 of 6)	-intron (ENSMUST00000020617.2, intron 1 of 29)	15369	ENSMUST00000152253.1	ENSMUST00000152253	ENSMUST00000152253	ENSMUSG00000020357	Flt4	FMS-like tyrosine kinase 4 [Source:MGI Symbol;Acc:MGI:95561]	11	49500090	49543566	1
chr5_112126786_112127712	5.27619	2.98575	352.784	1.04918e-78	1.29291e-75	chr5 112126786 112127712	0.737391	0.217066	0.191258	0.565517	20.0333	18.5255	13.2223	13	4	4	24	882	722	235	114099	chr5	112126787	112127712	+	Intergenic	Intergenic	-28988	ENSMUST00000197688.1	ENSMUST00000197688	ENSMUST00000197688	ENSMUSG00000104538	1700016B01Rik	RIKEN cDNA 1700016B01 gene [Source:MGI Symbol;Acc:MGI:1922890]	5	112304103	112313110	1
chr13_47355219_47355726	5.31582	2.66552	351.745	1.76637e-78	2.15252e-75	chr13 47355219 47355726	0.340335	0.542665	0.143444	0.353448	16.6944	13.3168	11.1968	6	10	3	15	735	519	199	38445	chr13	47355220	47355726	+	Intergenic	Intergenic	-5913	ENSMUST00000224000.1	ENSMUST00000224000	ENSMUST00000224000	ENSMUSG00000114843	Gm35733	predicted gene, 35733 [Source:MGI Symbol;Acc:MGI:5594892]	13	47514862	47593030	1
chr5_92634860_92635443	4.87478	2.45601	351.485	2.0123e-78	2.42527e-75	chr5 92634860 92635443	0.623947	0.217066	0.239073	0.471264	12.5379	11.2384	11.5906	11	4	5	20	552	438	206	112644	chr5	92634861	92635443	+	intron (ENSMUST00000212060.1, intron 3 of 4)	-intron (ENSMUST00000060930.9, intron 16 of 24)	8732	ENSMUST00000212060.1	ENSMUST00000212060	ENSMUST00000212060	ENSMUSG00000050050	Ccdc158	coiled-coil domain containing 158 [Source:MGI Symbol;Acc:MGI:2444555]	5	92755813	92823130	-1
chr17_80063963_80064223	5.8223	2.03396	350.484	3.32444e-78	3.96313e-75	chr17 80063963 80064223	0.22689	0.108533	0.191258	0.117816	9.26711	9.1601	8.04593	4	2	4	5	408	357	143	66991	chr17	80063964	80064223	+	Intergenic	Intergenic	-1759	ENSMUST00000061331.13	ENSMUST00000061331	ENSMUST00000061331	NA	NA	NA	NA	NA	NA	NA
chr1_112485838_112487029	5.02181	2.49101	349.689	4.9526e-78	5.84061e-75	chr1 112485838 112487029	0.397057	0.379866	0.286888	0.400575	10.0621	13.0602	13.5037	7	7	6	17	443	509	240	5633	chr1	112485839	112487029	+	Intergenic	Intergenic	18523	ENSMUST00000158066.1	ENSMUST00000158066	ENSMUST00000158066	ENSMUSG00000088691	Gm22331	predicted gene, 22331 [Source:MGI Symbol;Acc:MGI:5452108]	1	112395641	112395776	1
chr5_48682821_48683431	4.20108	2.70995	347.58	1.42609e-77	1.6639e-74	chr5 48682821 48683431	0.850836	0.813998	0.765034	0.636207	13.3328	13.0602	15.0791	15	15	16	27	587	509	268	110459	chr5	48682822	48683431	+	intron (ENSMUST00000087395.10, intron 1 of 8)	-intron (ENSMUST00000087395.10, intron 1 of 8)	17221	ENSMUST00000176280.1	ENSMUST00000176280	ENSMUST00000176280	ENSMUSG00000093748	Gm19031	predicted gene, 19031 [Source:MGI Symbol;Acc:MGI:5011216]	5	48823247	48824611	1
chr12_32075307_32075932	5.43069	2.59462	347.512	1.47581e-77	1.70378e-74	chr12 32075307 32075932	0.340335	0.271333	0.334702	0.282759	12.5606	10.6226	16.8233	6	5	7	12	553	414	299	30322	chr12	32075308	32075932	+	TTS (ENSMUST00000219617.1)	#NAME?	5223	ENSMUST00000219617.1	ENSMUST00000219617	ENSMUST00000219617	ENSMUSG00000112569	Gm33111	predicted gene, 33111 [Source:MGI Symbol;Acc:MGI:5592270]	12	32123285	32130849	-1
chr2_178482564_178483371	5.31234	2.27026	347.421	1.54458e-77	1.76461e-74	chr2 178482564 178483371	0.397057	0.434132	0.143444	0.164943	10.8116	10.5713	9.73389	7	8	3	7	476	412	173	89334	chr2	178482565	178483371	+	intron (ENSMUST00000108912.8, intron 13 of 13)	-intron (ENSMUST00000042092.8, intron 14 of 14)	22338	ENSMUST00000176869.1	ENSMUST00000176869	ENSMUST00000176869	ENSMUSG00000039155	Cdh26	cadherin-like 26 [Source:MGI Symbol;Acc:MGI:2685856]	2	178072324	178129159	1
chr16_85889639_85890168	5.0113	2.24548	345.958	3.21627e-77	3.63654e-74	chr16 85889639 85890168	0.22689	0.271333	0.430332	0.306322	9.56238	10.2634	10.8029	4	5	9	13	421	400	192	60839	chr16	85889640	85890168	+	intron (ENSMUST00000023611.6, intron 1 of 7)	-intron (ENSMUST00000023611.6, intron 1 of 7)	11924	ENSMUST00000023611.6	ENSMUST00000023611	ENSMUST00000023611	ENSMUSG00000022894	Adamts5	ADAM metallopeptidase with thrombospondin type 1 motif 5 [Source:MGI Symbol;Acc:MGI:1346321]	16	85653061	85698716	-1
chr11_49938494_49939315	3.32088	3.41274	345.569	3.90937e-77	4.3751e-74	chr11 49938494 49939315	2.04201	2.22493	2.24729	2.09713	22.8044	20.963	20.7056	36	41	47	89	1004	817	368	22048	chr11	49938495	49939315	+	intron (ENSMUST00000063444.2, intron 1 of 13)	-intron (ENSMUST00000063444.2, intron 1 of 13)	-24880	ENSMUST00000109172.3	ENSMUST00000109172	ENSMUST00000109172	ENSMUSG00000020374	Rasgef1c	RasGEF domain family, member 1C [Source:MGI Symbol;Acc:MGI:1921813]	11	49792662	49871821	1
chr11_34899360_34899866	4.24922	2.82954	343.733	9.81589e-77	1.08743e-73	chr11 34899360 34899866	0.623947	0.705465	0.812849	0.918965	13.4237	14.6254	17.4422	11	13	17	39	591	570	310	21422	chr11	34899361	34899866	+	TTS (ENSMUST00000082643.1)	#NAME?	596	ENSMUST00000082643.1	ENSMUST00000082643	ENSMUST00000082643	NA	NA	NA	NA	NA	NA	NA
chr5_112385887_112386511	5.06609	2.72283	342.185	2.13265e-76	2.33898e-73	chr5 112385887 112386511	0.680669	0.1628	0.62159	0.306322	15.695	15.2668	11.7032	12	3	13	13	691	595	208	114140	chr5	112385888	112386511	+	intron (ENSMUST00000198357.1, intron 2 of 2)	-intron (ENSMUST00000031291.8, intron 2 of 2)	3539	ENSMUST00000198357.1	ENSMUST00000198357	ENSMUST00000198357	ENSMUSG00000029348	Asphd2	aspartate beta-hydroxylase domain containing 2 [Source:MGI Symbol;Acc:MGI:1920148]	5	112532220	112542732	-1
chr6_37596985_37597667	4.27105	2.74938	341.471	3.05079e-76	3.31283e-73	chr6 37596985 37597667	0.907559	0.705465	0.860663	0.565517	14.0142	15.5747	12.8847	16	13	18	24	617	607	229	119434	chr6	37596986	37597667	+	Intergenic	Intergenic	55912	ENSMUST00000201541.1	ENSMUST00000201541	ENSMUST00000201541	ENSMUSG00000106889	Gm7463	predicted gene 7463 [Source:MGI Symbol;Acc:MGI:3645336]	6	37518349	37518895	1
chr9_45170991_45171805	4.50519	3.38569	341.387	3.18257e-76	3.42204e-73	chr9 45170991 45171805	1.41806	0.868264	1.00411	0.777586	27.5742	22.5282	17.0484	25	16	21	33	1214	878	303	144867	chr9	45170992	45171805	+	Intergenic	Intergenic	-1452	ENSMUST00000213594.1	ENSMUST00000213594	ENSMUST00000213594	ENSMUSG00000111811	Gm39327	predicted gene, 39327 [Source:MGI Symbol;Acc:MGI:5622212]	9	45078283	45081244	-1
chr3_10204691_10205728	5.13744	2.17043	340.353	5.34577e-76	5.69221e-73	chr3 10204691 10205728	0.340335	0.108533	0.334702	0.282759	9.97123	9.03181	10.0715	6	2	7	12	439	352	179	89974	chr3	10204692	10205728	+	exon (ENSMUST00000191757.1, exon 1 of 1)	-exon (ENSMUST00000191757.1, exon 1 of 1)	3348	ENSMUST00000191757.1	ENSMUST00000191757	ENSMUST00000191757	ENSMUSG00000062515	Fabp4	fatty acid binding protein 4, adipocyte [Source:MGI Symbol;Acc:MGI:88038]	3	10269148	10273636	-1
chr9_96139794_96140392	5.2499	2.27151	338.293	1.50148e-75	1.58341e-72	chr9 96139794 96140392	0.510502	0.217066	0.334702	0.141379	10.0167	10.2378	11.028	9	4	7	6	441	399	196	148582	chr9	96139795	96140392	+	intron (ENSMUST00000129774.1, intron 3 of 15)	-intron (ENSMUST00000085217.11, intron 4 of 15)	15873	ENSMUST00000136496.1	ENSMUST00000136496	ENSMUST00000136496	ENSMUSG00000041440	Gk5	glycerol kinase 5 [Source:MGI Symbol;Acc:MGI:2443336]	9	96001415	96066661	1
chr14_69989291_69989940	5.09342	2.84816	338.177	1.59176e-75	1.66263e-72	chr14 69989291 69989940	0.22689	0.217066	0.765034	0.518391	18.0345	16.5754	12.1533	4	4	16	22	794	646	216	47087	chr14	69989292	69989940	+	intron (ENSMUST00000022678.4, intron 4 of 6)	-intron (ENSMUST00000022678.4, intron 4 of 6)	67751	ENSMUST00000224990.1	ENSMUST00000224990	ENSMUST00000224990	ENSMUSG00000114446	Gm33524	predicted gene, 33524 [Source:MGI Symbol;Acc:MGI:5592683]	14	70255680	70294816	-1
chr9_121936834_121937685	4.49262	2.74545	337.737	1.98485e-75	2.05366e-72	chr9 121936834 121937685	0.680669	0.596932	0.717219	0.565517	15.5815	15.6004	11.4219	12	11	15	24	686	608	203	150605	chr9	121936835	121937685	+	promoter-TSS (ENSMUST00000063103.4)	#NAME?	37	ENSMUST00000214777.1	ENSMUST00000214777	ENSMUST00000214777	ENSMUSG00000043773	1700048O20Rik	RIKEN cDNA 1700048O20 gene [Source:MGI Symbol;Acc:MGI:1920637]	9	121766289	121776082	1
chr17_88519021_88519520	5.11693	2.22683	337.342	2.42001e-75	2.48051e-72	chr17 88519021 88519520	0.567224	0.217066	0.191258	0.235632	9.81223	10.4174	9.90269	10	4	4	10	432	406	176	67836	chr17	88519022	88519520	+	Intergenic	Intergenic	-10847	ENSMUST00000038551.7	ENSMUST00000038551	ENSMUST00000038551	ENSMUSG00000034709	Ppp1r21	protein phosphatase 1, regulatory subunit 21 [Source:MGI Symbol;Acc:MGI:1921075]	17	88837546	88895795	1
chr10_61035505_61036249	5.35342	2.22315	335.972	4.80974e-75	4.88434e-72	chr10 61035505 61036249	0.283612	0.108533	0.382517	0.212069	8.79012	11.0845	10.4653	5	2	8	9	387	432	186	14537	chr10	61035506	61036249	+	intron (ENSMUST00000177492.1, intron 1 of 2)	-intron (ENSMUST00000177492.1, intron 1 of 2)	4574	ENSMUST00000177492.1	ENSMUST00000177492	ENSMUST00000177492	ENSMUSG00000093568	Gm20611	predicted gene 20611 [Source:MGI Symbol;Acc:MGI:5313058]	10	60867082	60873859	1
chr5_22589274_22590095	3.96824	3.43614	335.779	5.29801e-75	5.33082e-72	chr5 22589274 22590095	1.30462	1.57373	1.48225	1.46092	21.9412	18.4228	28.5265	23	29	31	62	966	718	507	108655	chr5	22589275	22590095	+	intron (ENSMUST00000181209.1, intron 3 of 4)	-intron (ENSMUST00000181209.1, intron 3 of 4)	23497	ENSMUST00000121001.1	ENSMUST00000121001	ENSMUST00000121001	ENSMUSG00000081855	Rpl17-ps5	ribosomal protein L17, pseudogene 5 [Source:MGI Symbol;Acc:MGI:3704246]	5	22817626	22818180	-1
chr1_115721677_115722396	4.37971	2.61309	334.976	7.92545e-75	7.90204e-72	chr1 115721677 115722396	0.623947	0.434132	0.573775	0.754023	11.8337	12.7266	14.629	11	8	12	32	521	496	260	5700	chr1	115721678	115722396	+	intron (ENSMUST00000043725.8, intron 1 of 23)	-intron (ENSMUST00000043725.8, intron 1 of 23)	37281	ENSMUST00000043725.8	ENSMUST00000043725	ENSMUST00000043725	ENSMUSG00000070695	Cntnap5a	contactin associated protein-like 5A [Source:MGI Symbol;Acc:MGI:3643623]	1	115612486	116515053	1
chr10_74919138_74919670	4.06306	2.70642	334.158	1.19463e-74	1.18037e-71	chr10 74919138 74919670	0.623947	0.759731	0.908478	0.895402	12.5379	14.2148	14.4039	11	14	19	38	552	554	256	15462	chr10	74919139	74919670	+	Intergenic	Intergenic	-47773	ENSMUST00000037813.4	ENSMUST00000037813	ENSMUST00000037813	ENSMUSG00000040009	Gnaz	guanine nucleotide binding protein, alpha z subunit [Source:MGI Symbol;Acc:MGI:95780]	10	74803009	74852739	1
chr10_40712991_40713712	4.22037	2.86715	334.091	1.23547e-74	1.20982e-71	chr10 40712991 40713712	0.964281	1.08533	0.812849	0.58908	17.2623	14.4714	14.3476	17	20	17	25	760	564	255	13311	chr10	40712992	40713712	+	intron (ENSMUST00000058747.3, intron 1 of 4)	-intron (ENSMUST00000058747.3, intron 1 of 4)	30070	ENSMUST00000058747.3	ENSMUST00000058747	ENSMUST00000058747	ENSMUSG00000045555	Mettl24	methyltransferase like 24 [Source:MGI Symbol;Acc:MGI:3045338]	10	40559278	40687079	1
chr17_85522769_85523146	5.0615	2.31186	333.468	1.68847e-74	1.63879e-71	chr17 85522769 85523146	0.283612	0.108533	0.382517	0.400575	10.4482	11.9569	9.5651	5	2	8	17	460	466	170	67505	chr17	85522770	85523146	+	Intergenic	Intergenic	19745	ENSMUST00000234073.1	ENSMUST00000234073	ENSMUST00000234073	ENSMUSG00000117344	Gm5231	predicted gene 5231 [Source:MGI Symbol;Acc:MGI:3643308]	17	85849053	85850131	-1
chr4_107223425_107224213	3.83327	2.85984	333.323	1.81527e-74	1.7464e-71	chr4 107223425 107224213	0.737391	1.03106	1.09974	1.22529	15.218	14.5741	15.5292	13	19	23	52	670	568	276	103311	chr4	107223426	107224213	+	Intergenic	Intergenic	12161	ENSMUST00000142657.1	ENSMUST00000142657	ENSMUST00000142657	ENSMUSG00000028617	Lrrc42	leucine rich repeat containing 42 [Source:MGI Symbol;Acc:MGI:1925059]	4	107090711	107110729	-1
chr4_126983600_126984455	4.81274	2.64626	332.816	2.34178e-74	2.23334e-71	chr4 126983600 126984455	0.22689	0.325599	0.717219	0.541954	14.6729	14.5227	11.028	4	6	15	23	646	566	196	104835	chr4	126983601	126984455	+	TTS (ENSMUST00000117303.1)	#NAME?	589	ENSMUST00000117303.1	ENSMUST00000117303	ENSMUST00000117303	ENSMUSG00000081609	Gm12939	predicted gene 12939 [Source:MGI Symbol;Acc:MGI:3652092]	4	126877232	126877396	1
chr5_52559481_52560051	5.30649	2.1471	332.77	2.39594e-74	2.2653e-71	chr5 52559481 52560051	0.170167	0.1628	0.239073	0.306322	10.3346	8.39034	10.0152	3	3	5	13	455	327	178	110613	chr5	52559482	52560051	+	intron (ENSMUST00000199942.4, intron 4 of 7)	-intron (ENSMUST00000039750.6, intron 4 of 6)	6537	ENSMUST00000199942.4	ENSMUST00000199942	ENSMUST00000199942	ENSMUSG00000039252	Lgi2	leucine-rich repeat LGI family, member 2 [Source:MGI Symbol;Acc:MGI:2180196]	5	52690859	52723804	-1
chr1_54816684_54817165	3.56357	3.33642	332.148	3.27242e-74	3.06754e-71	chr1 54816684 54817165	1.87184	1.41093	2.19947	1.57874	21.2598	18.9103	22.1685	33	26	46	67	936	737	394	2485	chr1	54816685	54817165	+	intron (ENSMUST00000180327.7, intron 2 of 7)	-intron (ENSMUST00000044359.15, intron 2 of 27)	-3482	ENSMUST00000178905.1	ENSMUST00000178905	ENSMUST00000178905	ENSMUSG00000052331	Ankrd44	ankyrin repeat domain 44 [Source:MGI Symbol;Acc:MGI:3045243]	1	54684499	54965546	-1
chr1_191712156_191712843	5.58712	2.27767	332.078	3.39049e-74	3.15129e-71	chr1 191712156 191712843	0.283612	0.1628	0.286888	0.164943	11.1523	11.8542	8.271	5	3	6	7	491	462	147	10842	chr1	191712157	191712843	+	Intergenic	Intergenic	-5334	ENSMUST00000110855.7	ENSMUST00000110855	ENSMUST00000110855	ENSMUSG00000026623	Lpgat1	lysophosphatidylglycerol acyltransferase 1 [Source:MGI Symbol;Acc:MGI:2446186]	1	191449946	191516367	1
chr1_15643705_15644426	5.45125	2.32379	331.484	4.56601e-74	4.20821e-71	chr1 15643705 15644426	0.113445	0.596932	0.0956292	0.212069	10.0621	12.1621	10.2965	2	11	2	9	443	474	183	576	chr1	15643706	15644426	+	intron (ENSMUST00000175681.2, intron 2 of 2)	-intron (ENSMUST00000170146.2, intron 1 of 1)	41980	ENSMUST00000158204.1	ENSMUST00000158204	ENSMUST00000158204	ENSMUSG00000088829	Gm25227	predicted gene, 25227 [Source:MGI Symbol;Acc:MGI:5455004]	1	15756159	15756270	-1
chr13_50321990_50322903	4.98614	2.511	331.311	4.97936e-74	4.55093e-71	chr13 50321990 50322903	0.113445	0.1628	0.478146	0.58908	13.1057	12.547	11.2531	2	3	10	25	577	489	200	38660	chr13	50321991	50322903	+	Intergenic	Intergenic	54471	ENSMUST00000222366.1	ENSMUST00000222366	ENSMUST00000222366	ENSMUSG00000114035	Gm31126	predicted gene, 31126 [Source:MGI Symbol;Acc:MGI:5590285]	13	50422012	50430706	1
chr2_71924873_71925562	5.43115	2.45221	331.266	5.09384e-74	4.61708e-71	chr2 71924873 71925562	0.340335	0.108533	0.334702	0.282759	12.8558	13.5734	8.94618	6	2	7	12	566	529	159	82178	chr2	71924874	71925562	+	Intergenic	Intergenic	-30835	ENSMUST00000133981.1	ENSMUST00000133981	ENSMUST00000133981	ENSMUSG00000087345	Gm13746	predicted gene 13746 [Source:MGI Symbol;Acc:MGI:3651629]	2	71786397	71787712	1
chr11_20668076_20668752	5.24388	2.34768	330.253	8.46605e-74	7.61077e-71	chr11 20668076 20668752	0.22689	0.325599	0.143444	0.377011	10.3801	13.0089	9.50883	4	6	3	16	457	507	169	20537	chr11	20668077	20668752	+	Intergenic	Intergenic	21259	ENSMUST00000109585.1	ENSMUST00000109585	ENSMUST00000109585	ENSMUSG00000049800	Sertad2	SERTA domain containing 2 [Source:MGI Symbol;Acc:MGI:1931026]	11	20493253	20603021	1
chr7_66333853_66334551	4.75114	2.33774	330.204	8.67679e-74	7.7368e-71	chr7 66333853 66334551	0.283612	0.651198	0.334702	0.353448	11.334	11.0332	9.84642	5	12	7	15	499	430	175	129531	chr7	66333854	66334551	+	intron (ENSMUST00000015277.13, intron 3 of 33)	-intron (ENSMUST00000015277.13, intron 3 of 33)	9063	ENSMUST00000130438.2	ENSMUST00000130438	ENSMUST00000130438	ENSMUSG00000015133	Lrrk1	leucine-rich repeat kinase 1 [Source:MGI Symbol;Acc:MGI:2142227]	7	65876660	66038098	-1
chr1_13914975_13915840	5.15948	2.5081	329.94	9.90707e-74	8.76257e-71	chr1 13914975 13915840	0.737391	0.217066	0.0478146	0.377011	11.1296	12.9062	13.0535	13	4	1	16	490	503	232	506	chr1	13914976	13915840	+	Intergenic	Intergenic	-16970	ENSMUST00000158733.1	ENSMUST00000158733	ENSMUST00000158733	NA	NA	NA	NA	NA	NA	NA
chr8_78212977_78213571	4.45371	2.48578	329.82	1.0518e-73	9.22853e-71	chr8 78212977 78213571	0.794114	0.379866	0.334702	0.612644	12.3789	11.5463	11.7032	14	7	7	26	545	450	208	138873	chr8	78212978	78213571	+	promoter-TSS (ENSMUST00000049395.14)	#NAME?	-23	ENSMUST00000117845.7	ENSMUST00000117845	ENSMUST00000117845	ENSMUSG00000037101	Ttc29	tetratricopeptide repeat domain 29 [Source:MGI Symbol;Acc:MGI:1920551]	8	78939926	79120955	1
chr3_154458089_154458649	5.30068	2.31045	329.147	1.47389e-73	1.28293e-70	chr3 154458089 154458649	0.113445	0.217066	0.0956292	0.471264	10.6299	11.4437	10.184	2	4	2	20	468	446	181	97934	chr3	154458090	154458649	+	Intergenic	Intergenic	126372	ENSMUST00000181234.1	ENSMUST00000181234	ENSMUST00000181234	ENSMUSG00000093738	AI606473	expressed sequence AI606473 [Source:MGI Symbol;Acc:MGI:2139767]	3	154036458	154039891	1
chr15_72207872_72208569	4.18782	3.36033	328.802	1.75284e-73	1.51373e-70	chr15 72207872 72208569	0.737391	0.759731	1.29099	1.72011	23.5766	20.1933	22.056	13	14	27	73	1038	787	392	53016	chr15	72207873	72208569	+	intron (ENSMUST00000229807.1, intron 2 of 3)	-intron (ENSMUST00000229807.1, intron 2 of 3)	46859	ENSMUST00000229509.1	ENSMUST00000229509	ENSMUST00000229509	ENSMUSG00000116068	Gm49457	predicted gene, 49457 [Source:MGI Symbol;Acc:MGI:6155113]	15	72033195	72159163	1
chr10_87384514_87385089	5.0318	2.15056	328.443	2.09871e-73	1.79825e-70	chr10 87384514 87385089	0.397057	0.1628	0.143444	0.377011	9.5851	9.57064	9.3963	7	3	3	16	422	373	167	16702	chr10	87384515	87385089	+	Intergenic	Intergenic	-20656	ENSMUST00000179147.1	ENSMUST00000179147	ENSMUST00000179147	NA	NA	NA	NA	NA	NA	NA
chr13_91857182_91858041	4.62751	2.41245	328.135	2.44856e-73	2.08175e-70	chr13 91857182 91858041	0.397057	0.596932	0.62159	0.306322	11.5839	10.7509	11.6469	7	11	13	13	510	419	207	40933	chr13	91857183	91858041	+	intron (ENSMUST00000022122.3, intron 8 of 9)	-intron (ENSMUST00000022122.3, intron 8 of 9)	-3820	ENSMUST00000122270.2	ENSMUST00000122270	ENSMUST00000122270	ENSMUSG00000082488	1700119I11Rik	RIKEN cDNA 1700119I11 gene [Source:MGI Symbol;Acc:MGI:1925729]	13	92009551	92010163	1
chr9_63971140_63972127	4.6273	2.55595	326.741	4.92826e-73	4.15775e-70	chr9 63971140 63972127	0.510502	0.759731	0.239073	0.518391	12.924	13.753	10.8029	9	14	5	22	569	536	192	146529	chr9	63971141	63972127	+	intron (ENSMUST00000041029.5, intron 3 of 3)	-intron (ENSMUST00000041029.5, intron 3 of 3)	-34513	ENSMUST00000214004.1	ENSMUST00000214004	ENSMUST00000214004	ENSMUSG00000111058	Gm36033	predicted gene, 36033 [Source:MGI Symbol;Acc:MGI:5595192]	9	63833937	63849084	-1
chrX_158701871_158702405	5.28954	2.07047	326.657	5.13811e-73	4.30169e-70	chrX 158701871 158702405	0.170167	0.217066	0.143444	0.306322	8.17686	9.44234	9.62136	3	4	3	13	360	368	171	154090	chrX	158701872	158702405	+	Intergenic	Intergenic	-131297	ENSMUST00000118817.1	ENSMUST00000118817	ENSMUST00000118817	ENSMUSG00000082026	Gm5764	predicted gene 5764 [Source:MGI Symbol;Acc:MGI:3645102]	X	157616431	157617315	1
chr5_67155421_67156192	5.39257	2.04457	326.326	6.06722e-73	5.04107e-70	chr5 67155421 67156192	0.0567224	0.325599	0.0956292	0.282759	8.38128	9.23708	9.11497	1	6	2	12	369	360	162	111350	chr5	67155422	67156192	+	Intergenic	Intergenic	28304	ENSMUST00000201933.1	ENSMUST00000201933	ENSMUST00000201933	ENSMUSG00000106995	Gm33167	predicted gene, 33167 [Source:MGI Symbol;Acc:MGI:5592326]	5	67284846	67287488	1
chr15_92566621_92567023	6.05138	1.94389	324.581	1.45567e-72	1.20038e-69	chr15 92566621 92567023	0.22689	0.0542665	0.143444	0.0942529	8.81284	7.10742	9.22751	4	1	3	4	388	277	164	54992	chr15	92566622	92567023	+	intron (ENSMUST00000229173.1, intron 1 of 2)	-intron (ENSMUST00000169942.9, intron 3 of 9)	-30304	ENSMUST00000035399.9	ENSMUST00000035399	ENSMUST00000035399	ENSMUSG00000036218	Pdzrn4	PDZ domain containing RING finger 4 [Source:MGI Symbol;Acc:MGI:3056996]	15	92294762	92669700	1
chr18_6152026_6152775	4.95844	2.22814	324.151	1.80569e-72	1.4779e-69	chr18 6152026 6152775	0.340335	0.596932	0.191258	0.235632	9.78952	10.2378	10.0152	6	11	4	10	431	399	178	68200	chr18	6152027	6152775	+	Intergenic	Intergenic	-16303	ENSMUST00000182559.7	ENSMUST00000182559	ENSMUST00000182559	ENSMUSG00000041225	Arhgap12	Rho GTPase activating protein 12 [Source:MGI Symbol;Acc:MGI:1922665]	18	6024427	6136098	-1
chr15_72607056_72607776	4.3043	2.80923	323.996	1.95237e-72	1.58612e-69	chr15 72607056 72607776	0.794114	0.759731	0.573775	0.824713	15.6496	16.8577	11.8157	14	14	12	35	689	657	210	53036	chr15	72607057	72607776	+	intron (ENSMUST00000089770.10, intron 20 of 21)	-intron (ENSMUST00000023276.15, intron 20 of 21)	19133	ENSMUST00000230426.1	ENSMUST00000230426	ENSMUST00000230426	ENSMUSG00000116088	Gm49460	predicted gene, 49460 [Source:MGI Symbol;Acc:MGI:6155117]	15	72460132	72477902	1
chr9_47384198_47385535	3.81336	3.1831	323.001	3.21491e-72	2.59261e-69	chr9 47384198 47385535	1.36134	0.976797	1.72133	1.29598	20.1923	20.4499	15.8668	24	18	36	55	889	797	282	145072	chr9	47384199	47385535	+	Intergenic	Intergenic	-16218	ENSMUST00000209388.1	ENSMUST00000209388	ENSMUST00000209388	ENSMUSG00000109844	Gm31816	predicted gene, 31816 [Source:MGI Symbol;Acc:MGI:5590975]	9	47153624	47279947	-1
chr18_33041408_33041989	5.694	2.26089	322.058	5.1595e-72	4.13042e-69	chr18 33041408 33041989	0.113445	0.379866	0.334702	0.0706896	9.15354	10.1351	12.2096	2	7	7	3	403	395	217	69583	chr18	33041409	33041989	+	intron (ENSMUST00000234654.1, intron 4 of 14)	-intron (ENSMUST00000042868.5, intron 1 of 10)	-36933	ENSMUST00000157452.1	ENSMUST00000157452	ENSMUST00000157452	NA	NA	NA	NA	NA	NA	NA
chr8_46921436_46922056	4.71687	2.28267	321.888	5.61929e-72	4.46591e-69	chr8 46921436 46922056	0.340335	0.434132	0.334702	0.424138	11.493	9.28839	10.2965	6	8	7	18	506	362	183	137422	chr8	46921437	46922056	+	Intergenic	Intergenic	27053	ENSMUST00000210613.1	ENSMUST00000210613	ENSMUST00000210613	ENSMUSG00000109759	1700011L03Rik	RIKEN cDNA 1700011L03 gene [Source:MGI Symbol;Acc:MGI:1916535]	8	47399830	47401834	-1
chr2_151670264_151671287	3.35302	3.59585	321.192	7.96792e-72	6.28691e-69	chr2 151670264 151671287	1.7584	2.71333	2.77325	2.33276	24.3489	26.9158	22.2248	31	50	58	99	1072	1049	395	86951	chr2	151670265	151671287	+	Intergenic	Intergenic	-2243	ENSMUST00000180195.7	ENSMUST00000180195	ENSMUST00000180195	ENSMUSG00000074704	Rad21l	RAD21-like (S. pombe) [Source:MGI Symbol;Acc:MGI:3652039]	2	151487324	151510453	-1
chr15_33665930_33666708	4.39776	2.71374	318.117	3.72422e-71	2.91753e-68	chr15 33665930 33666708	0.510502	0.596932	0.812849	0.683333	12.8786	12.2391	17.1046	9	11	17	29	567	477	304	50976	chr15	33665931	33666708	+	Intergenic	Intergenic	-12883	ENSMUST00000228272.1	ENSMUST00000228272	ENSMUST00000228272	ENSMUSG00000115779	4930592A05Rik	RIKEN cDNA 4930592A05 gene [Source:MGI Symbol;Acc:MGI:1923130]	15	33594027	33653582	-1
chr4_105432292_105433105	4.67952	2.66867	317.006	6.5028e-71	5.05811e-68	chr4 105432292 105433105	0.737391	0.759731	0.143444	0.518391	15.4225	13.1885	12.097	13	14	3	22	679	514	215	103138	chr4	105432293	105433105	+	Intergenic	Intergenic	-57753	ENSMUST00000118507.1	ENSMUST00000118507	ENSMUST00000118507	ENSMUSG00000081819	Gm12722	predicted gene 12722 [Source:MGI Symbol;Acc:MGI:3652209]	4	105231651	105232143	-1
chr7_145302419_145303022	5.28936	2.4679	316.979	6.59113e-71	5.09072e-68	chr7 145302419 145303022	0.397057	0.1628	0.334702	0.306322	12.4243	14.3431	8.88991	7	3	7	13	547	559	158	134900	chr7	145302420	145303022	+	intron (ENSMUST00000117718.1, intron 1 of 3)	-intron (ENSMUST00000033386.11, intron 1 of 2)	1822	ENSMUST00000117718.1	ENSMUST00000117718	ENSMUST00000117718	ENSMUSG00000031070	Mrgprf	MAS-related GPR, member F [Source:MGI Symbol;Acc:MGI:2384823]	7	144854565	144863294	1
chr1_42917908_42918442	3.58338	2.85961	316.336	9.10068e-71	6.97984e-68	chr1 42917908 42918442	1.36134	1.3024	1.09974	1.20172	15.4452	14.0609	14.9666	24	24	23	51	680	548	266	1944	chr1	42917909	42918442	+	Intergenic	Intergenic	15118	ENSMUST00000202358.1	ENSMUST00000202358	ENSMUST00000202358	ENSMUSG00000060679	Mrps9	mitochondrial ribosomal protein S9 [Source:MGI Symbol;Acc:MGI:1916777]	1	42890393	42944843	1
chr8_126387460_126388073	5.29735	2.04448	316.13	1.00902e-70	7.68503e-68	chr8 126387460 126388073	0.113445	0.325599	0.191258	0.235632	9.40339	9.39103	7.59581	2	6	4	10	414	366	135	142431	chr8	126387461	126388073	+	intron (ENSMUST00000238518.1, intron 5 of 7)	-intron (ENSMUST00000108759.2, intron 4 of 6)	-34748	ENSMUST00000059093.6	ENSMUST00000059093	ENSMUST00000059093	ENSMUSG00000051671	Coa6	cytochrome c oxidase assembly factor 6 [Source:MGI Symbol;Acc:MGI:1915142]	8	127149254	127152172	1
chr13_93082159_93082993	4.69917	2.60093	315.869	1.15033e-70	8.70084e-68	chr13 93082159 93082993	0.113445	0.379866	0.908478	0.518391	12.1517	13.1372	13.8975	2	7	19	22	535	512	247	41013	chr13	93082160	93082993	+	intron (ENSMUST00000062122.3, intron 4 of 12)	-intron (ENSMUST00000062122.3, intron 4 of 12)	9197	ENSMUST00000225665.1	ENSMUST00000225665	ENSMUST00000225665	ENSMUSG00000114382	Gm4814	predicted gene 4814 [Source:MGI Symbol;Acc:MGI:3647983]	13	93209812	93211265	1
chr10_21254490_21255052	4.66689	2.27201	315.063	1.72336e-70	1.29459e-67	chr10 21254490 21255052	0.453779	0.542665	0.143444	0.447701	10.6753	9.98117	10.1277	8	10	3	19	470	389	180	12371	chr10	21254491	21255052	+	Intergenic	Intergenic	-2657	ENSMUST00000217285.1	ENSMUST00000217285	ENSMUST00000217285	ENSMUSG00000111200	Gm33728	predicted gene, 33728 [Source:MGI Symbol;Acc:MGI:5592887]	10	21074000	21128013	-1
chr18_64350136_64351202	3.20243	3.65759	314.699	2.06775e-70	1.54272e-67	chr18 64350136 64351202	1.98528	2.93039	3.20358	2.80402	27.0745	24.9144	23.9127	35	54	67	119	1192	971	425	71789	chr18	64350137	64351202	+	intron (ENSMUST00000175965.9, intron 1 of 1)	-intron (ENSMUST00000175965.9, intron 1 of 1)	10649	ENSMUST00000175965.9	ENSMUST00000175965	ENSMUST00000175965	ENSMUSG00000045991	Onecut2	one cut domain, family member 2 [Source:MGI Symbol;Acc:MGI:1891408]	18	64473091	64534058	1
chr6_145337680_145338046	5.43392	1.99662	314.006	2.92786e-70	2.16968e-67	chr6 145337680 145338046	0.170167	0.271333	0.239073	0.141379	8.47214	9.54498	7.53955	3	5	5	6	373	372	134	126029	chr6	145337681	145338046	+	Intergenic	Intergenic	-21255	ENSMUST00000118804.1	ENSMUST00000118804	ENSMUST00000118804	ENSMUSG00000083962	Gm15707	predicted gene 15707 [Source:MGI Symbol;Acc:MGI:3783147]	6	145261339	145262334	-1
chr6_30196052_30196727	5.87603	2.38177	312.943	4.99107e-70	3.67379e-67	chr6 30196052 30196727	0.283612	0.488399	0.0478146	0.0706896	13.4237	11.1358	9.28377	5	9	1	3	591	434	165	118887	chr6	30196053	30196727	+	Intergenic	Intergenic	23497	ENSMUST00000194541.2	ENSMUST00000194541	ENSMUST00000194541	ENSMUSG00000103108	Rncr4	retina expressed non-coding RNA 4 [Source:MGI Symbol;Acc:MGI:5610274]	6	30172892	30175125	1
chr2_116652180_116653030	4.38594	2.29073	312.722	5.57391e-70	4.07546e-67	chr2 116652180 116653030	0.567224	0.434132	0.573775	0.424138	10.0621	10.8536	9.90269	10	8	12	18	443	423	176	84561	chr2	116652181	116653030	+	Intergenic	Intergenic	-124115	ENSMUST00000120190.1	ENSMUST00000120190	ENSMUST00000120190	ENSMUSG00000081787	Gm13991	predicted gene 13991 [Source:MGI Symbol;Acc:MGI:3651689]	2	116358324	116358971	-1
chr15_93189200_93189764	6.15636	1.96731	311.557	1.00027e-69	7.26521e-67	chr15 93189200 93189764	0.22689	0.1628	0.143444	0.0235632	9.72138	8.36468	7.08942	4	3	3	1	428	326	126	55016	chr15	93189201	93189764	+	Intergenic	Intergenic	-7113	ENSMUST00000182581.1	ENSMUST00000182581	ENSMUST00000182581	ENSMUSG00000097989	Gm4335	predicted gene 4335 [Source:MGI Symbol;Acc:MGI:3782519]	15	93094476	93095479	1
chr11_102324774_102325802	4.97735	3.17228	310.765	1.4881e-69	1.07373e-66	chr11 102324774 102325802	0.737391	0.759731	0.525961	0.518391	22.6454	23.2723	12.4909	13	14	11	22	997	907	222	26757	chr11	102324775	102325802	+	Intergenic	Intergenic	-5546	ENSMUST00000173870.7	ENSMUST00000173870	ENSMUST00000173870	ENSMUSG00000020923	Ubtf	upstream binding transcription factor, RNA polymerase I [Source:MGI Symbol;Acc:MGI:98512]	11	102195386	102210568	-1
chr17_3075104_3076184	4.58553	3.10602	310.506	1.69404e-69	1.21434e-66	chr17 3075104 3076184	0.623947	0.542665	1.29099	0.636207	19.6018	21.6045	14.0663	11	10	27	27	863	842	250	61912	chr17	3075105	3076184	+	TTS (ENSMUST00000142526.8)	#NAME?	8396	ENSMUST00000184936.7	ENSMUST00000184936	ENSMUST00000184936	ENSMUSG00000121378		novel transcript	17	3128013	3134458	-1
chr6_51178072_51179229	4.36339	3.86119	310.306	1.87283e-69	1.33379e-66	chr6 51178072 51179229	1.47478	2.27919	1.57788	0.942529	35.3649	34.7673	23.3501	26	42	33	40	1557	1355	415	120309	chr6	51178073	51179229	+	Intergenic	Intergenic	91259	ENSMUST00000083571.1	ENSMUST00000083571	ENSMUST00000083571	ENSMUSG00000065505	Mir148a	microRNA 148a [Source:MGI Symbol;Acc:MGI:2676833]	6	51246792	51246890	-1
chr19_52565194_52565812	5.49649	1.88248	309.843	2.36234e-69	1.67155e-66	chr19 52565194 52565812	0.113445	0.108533	0.286888	0.164943	8.63113	7.26137	7.82087	2	2	6	7	380	283	139	76939	chr19	52565195	52565812	+	Intergenic	Intergenic	228338	ENSMUST00000236031.1	ENSMUST00000236031	ENSMUST00000236031	ENSMUSG00000118114	Gm50332	predicted gene, 50332 [Source:MGI Symbol;Acc:MGI:6303200]	19	52325603	52334371	1
chr17_12382405_12383127	4.43474	2.4834	309.168	3.31409e-69	2.32995e-66	chr17 12382405 12383127	0.737391	0.759731	0.478146	0.353448	11.8337	12.5727	10.9155	13	14	10	15	521	490	194	62616	chr17	12382406	12383127	+	intron (ENSMUST00000232767.1, intron 2 of 4)	-intron (ENSMUST00000014578.6, intron 2 of 18)	4107	ENSMUST00000232767.1	ENSMUST00000232767	ENSMUST00000232767	ENSMUSG00000059481	Plg	plasminogen [Source:MGI Symbol;Acc:MGI:97620]	17	12597495	12638272	1
chr12_51988091_51988864	4.88707	2.39926	308.146	5.53407e-69	3.86592e-66	chr12 51988091 51988864	0.397057	0.488399	0.573775	0.188506	11.493	12.3418	9.84642	7	9	12	8	506	481	175	31181	chr12	51988092	51988864	+	exon (ENSMUST00000085404.9, exon 4 of 4)	-exon (ENSMUST00000085404.9, exon 4 of 4)	-6558	ENSMUST00000218223.1	ENSMUST00000218223	ENSMUST00000218223	ENSMUSG00000112064	Gm47399	predicted gene, 47399 [Source:MGI Symbol;Acc:MGI:6096327]	12	52041819	52042292	1
chr7_112753295_112753856	4.18713	2.72842	307.857	6.39957e-69	4.44224e-66	chr7 112753295 112753856	0.623947	1.03106	0.573775	0.801149	15.377	14.7793	11.4781	11	19	12	34	677	576	204	132468	chr7	112753296	112753856	+	intron (ENSMUST00000164363.7, intron 1 of 13)	-intron (ENSMUST00000059768.16, intron 1 of 13)	-5808	ENSMUST00000069256.11	ENSMUST00000069256	ENSMUST00000069256	ENSMUSG00000055320	Tead1	TEA domain family member 1 [Source:MGI Symbol;Acc:MGI:101876]	7	112278525	112506014	1
chr15_72033791_72034765	3.15694	3.3616	307.518	7.58542e-69	5.23227e-66	chr15 72033791 72034765	1.98528	2.17066	2.72543	2.26207	20.1923	20.4499	20.8182	35	40	57	96	889	797	370	53005	chr15	72033792	72034765	+	promoter-TSS (ENSMUST00000159993.7)	#NAME?	-51	ENSMUST00000159993.7	ENSMUST00000159993	ENSMUST00000159993	ENSMUSG00000079022	Col22a1	collagen, type XXII, alpha 1 [Source:MGI Symbol;Acc:MGI:1916950]	15	71667644	71906076	-1
chr1_35953858_35954496	3.64736	2.81759	306.599	1.20271e-68	8.24419e-66	chr1 35953858 35954496	0.794114	1.1396	1.19537	1.3431	14.4912	14.5997	14.3476	14	21	25	57	638	569	255	1354	chr1	35953859	35954496	+	Intergenic	Intergenic	-4742	ENSMUST00000191763.1	ENSMUST00000191763	ENSMUST00000191763	ENSMUSG00000103096	Gm8022	predicted gene 8022 [Source:MGI Symbol;Acc:MGI:3647993]	1	35998000	35998903	1
chr7_110092935_110093266	5.11183	1.88406	306.5	1.26391e-68	8.60991e-66	chr7 110092935 110093266	0.22689	0.271333	0.239073	0.188506	7.65445	7.69756	8.271	4	5	5	8	337	300	147	132182	chr7	110092936	110093266	+	exon (ENSMUST00000084727.10, exon 15 of 16)	-exon (ENSMUST00000084727.10, exon 15 of 16)	1472	ENSMUST00000209252.1	ENSMUST00000209252	ENSMUST00000209252	ENSMUSG00000061079	Zfp143	zinc finger protein 143 [Source:MGI Symbol;Acc:MGI:1277969]	7	109660424	109694601	1
chr7_75862362_75862994	5.28766	1.96054	306.34	1.36937e-68	9.27069e-66	chr7 75862362 75862994	0.283612	0.1628	0.0956292	0.259195	8.04058	9.28839	7.59581	5	3	2	11	354	362	135	130120	chr7	75862363	75862994	+	intron (ENSMUST00000205887.1, intron 1 of 1)	-intron (ENSMUST00000092073.10, intron 1 of 2)	14237	ENSMUST00000205887.1	ENSMUST00000205887	ENSMUST00000205887	ENSMUSG00000055652	Klhl25	kelch-like 25 [Source:MGI Symbol;Acc:MGI:2668031]	7	75498058	75523879	1
chr14_76747792_76748336	5.68582	2.27744	305.764	1.82803e-68	1.23e-65	chr14 76747792 76748336	0.22689	0.434132	0.239073	0.0471264	12.1744	8.80088	10.5779	4	8	5	2	536	343	188	47640	chr14	76747793	76748336	+	Intergenic	Intergenic	-12067	ENSMUST00000228541.1	ENSMUST00000228541	ENSMUST00000228541	ENSMUSG00000115709	4930431P22Rik	RIKEN cDNA 4930431P22 gene [Source:MGI Symbol;Acc:MGI:1921133]	14	76997571	76999657	1
chr11_34687555_34688541	4.19698	2.59125	305.634	1.95126e-68	1.30491e-65	chr11 34687555 34688541	0.737391	0.271333	0.956292	0.73046	11.9927	13.0602	13.0535	13	5	20	31	528	509	232	21408	chr11	34687556	34688541	+	intron (ENSMUST00000143540.7, intron 20 of 25)	-intron (ENSMUST00000093193.11, intron 21 of 51)	431	ENSMUST00000101364.2	ENSMUST00000101364	ENSMUST00000101364	ENSMUSG00000020143	Dock2	dedicator of cyto-kinesis 2 [Source:MGI Symbol;Acc:MGI:2149010]	11	34176815	34674719	-1
chr12_33014909_33015578	4.46343	2.83055	305.483	2.10498e-68	1.39918e-65	chr12 33014909 33015578	0.283612	1.1396	0.525961	0.754023	15.4452	13.0089	17.386	5	21	11	32	680	507	309	30383	chr12	33014910	33015578	+	Intergenic	Intergenic	-15234	ENSMUST00000158511.1	ENSMUST00000158511	ENSMUST00000158511	ENSMUSG00000089136	Gm24922	predicted gene, 24922 [Source:MGI Symbol;Acc:MGI:5454699]	12	33049908	33050009	-1
chr14_23340378_23340988	4.74152	2.17684	303.976	4.48375e-68	2.96238e-65	chr14 23340378 23340988	0.453779	0.325599	0.334702	0.329885	10.9025	9.13444	8.60859	8	6	7	14	480	356	153	44045	chr14	23340379	23340988	+	intron (ENSMUST00000225794.1, intron 23 of 28)	-intron (ENSMUST00000065788.14, intron 22 of 28)	19539	ENSMUST00000225611.1	ENSMUST00000225611	ENSMUST00000225611	ENSMUSG00000114803	Gm46443	predicted gene, 46443 [Source:MGI Symbol;Acc:MGI:5826080]	14	23371212	23371575	1
chr12_30922239_30922885	4.2444	2.843	303.582	5.4618e-68	3.58696e-65	chr12 30922239 30922885	0.964281	0.922531	0.573775	0.777586	14.7638	12.4701	18.6801	17	17	12	33	650	486	332	30232	chr12	30922240	30922885	+	intron (ENSMUST00000110880.2, intron 2 of 8)	-intron (ENSMUST00000020997.14, intron 2 of 9)	10375	ENSMUST00000128814.1	ENSMUST00000128814	ENSMUST00000128814	ENSMUSG00000020669	Sh3yl1	Sh3 domain YSC-like 1 [Source:MGI Symbol;Acc:MGI:1346118]	12	30961667	31010161	1
chr7_106906960_106907661	4.3148	2.53306	303.533	5.59849e-68	3.65485e-65	chr7 106906960 106907661	0.510502	0.379866	0.573775	0.824713	10.8343	13.2911	12.716	9	7	12	35	477	518	226	132000	chr7	106906961	106907661	+	promoter-TSS (ENSMUST00000207492.2)	#NAME?	-690	ENSMUST00000215949.1	ENSMUST00000215949	ENSMUST00000215949	ENSMUSG00000073899	Or2d3b	olfactory receptor family 2 subfamily D member 3B [Source:MGI Symbol;Acc:MGI:3031366]	7	106507208	106515472	1
chr4_57165611_57166214	4.77021	2.00913	303.331	6.19399e-68	4.01968e-65	chr4 57165611 57166214	0.22689	0.217066	0.382517	0.353448	8.29043	8.67259	8.66485	4	4	8	15	365	338	154	100930	chr4	57165612	57166214	+	Intergenic	Intergenic	-6158	ENSMUST00000152074.1	ENSMUST00000152074	ENSMUST00000152074	ENSMUSG00000085967	Gm12530	predicted gene 12530 [Source:MGI Symbol;Acc:MGI:3651546]	4	57172071	57176554	1
chr10_99382864_99383655	3.76828	2.74488	303.105	6.93807e-68	4.47607e-65	chr10 99382864 99383655	0.794114	1.19386	1.24318	0.871839	12.9921	14.2661	14.2351	14	22	26	37	572	556	253	17566	chr10	99382865	99383655	+	intron (ENSMUST00000189035.1, intron 1 of 2)	-intron (ENSMUST00000189035.1, intron 1 of 2)	-19530	ENSMUST00000218725.1	ENSMUST00000218725	ENSMUST00000218725	ENSMUSG00000044633	B530045E10Rik	RIKEN cDNA B530045E10 gene [Source:MGI Symbol;Acc:MGI:2445145]	10	99134750	99258909	1
chr17_65074756_65075430	4.6833	2.14154	303.005	7.2969e-68	4.68004e-65	chr17 65074756 65075430	0.22689	0.434132	0.382517	0.377011	9.19897	8.56995	10.4653	4	8	8	16	405	334	186	65998	chr17	65074757	65075430	+	Intergenic	Intergenic	94110	ENSMUST00000233948.1	ENSMUST00000233948	ENSMUST00000233948	ENSMUSG00000117336	Gm49865	predicted gene, 49865 [Source:MGI Symbol;Acc:MGI:6270540]	17	65475509	65476198	-1
chr15_44580136_44580839	5.15239	1.83924	302.945	7.51794e-68	4.79378e-65	chr15 44580136 44580839	0.22689	0.108533	0.239073	0.235632	7.65445	7.69756	7.48328	4	2	5	10	337	300	133	51590	chr15	44580137	44580839	+	intron (ENSMUST00000209244.1, intron 68 of 77)	-intron (ENSMUST00000038336.11, intron 68 of 76)	-11432	ENSMUST00000209939.1	ENSMUST00000209939	ENSMUST00000209939	ENSMUSG00000038725	Pkhd1l1	polycystic kidney and hepatic disease 1-like 1 [Source:MGI Symbol;Acc:MGI:2183153]	15	44320890	44464765	1
chr10_61874538_61875201	4.90121	1.93968	302.376	1.00032e-67	6.34162e-65	chr10 61874538 61875201	0.283612	0.217066	0.191258	0.329885	8.51756	7.90283	7.98967	5	4	4	14	375	308	142	14637	chr10	61874539	61875201	+	intron (ENSMUST00000105454.2, intron 19 of 40)	-intron (ENSMUST00000051826.13, intron 16 of 33)	3522	ENSMUST00000105451.7	ENSMUST00000105451	ENSMUST00000105451	ENSMUSG00000058806	Col13a1	collagen, type XIII, alpha 1 [Source:MGI Symbol;Acc:MGI:1277201]	10	61674015	61814887	-1
chr2_15293938_15295393	4.01092	2.68132	301.732	1.382e-67	8.71094e-65	chr2 15293938 15295393	0.794114	1.08533	0.765034	0.73046	14.5821	11.495	14.1226	14	20	16	31	642	448	251	78526	chr2	15293939	15295393	+	Intergenic	Intergenic	-47959	ENSMUST00000119955.2	ENSMUST00000119955	ENSMUST00000119955	ENSMUSG00000080930	Gm13367	predicted gene 13367 [Source:MGI Symbol;Acc:MGI:3651223]	2	15347436	15348231	1
chr9_99217906_99218692	5.36722	2.28175	301.514	1.54164e-67	9.66165e-65	chr9 99217906 99218692	0.170167	0.325599	0.191258	0.282759	12.3789	11.0588	7.76461	3	6	4	12	545	431	138	148827	chr9	99217907	99218692	+	Intergenic	Intergenic	2268	ENSMUST00000185530.1	ENSMUST00000185530	ENSMUST00000185530	ENSMUSG00000101498	Gm2950	predicted gene 2950 [Source:MGI Symbol;Acc:MGI:3781128]	9	99102101	99102620	-1
chr13_69700613_69701313	3.92391	2.75309	301.235	1.77265e-67	1.10463e-64	chr13 69700613 69701313	0.964281	1.19386	1.05192	0.636207	13.4464	14.6767	13.8413	17	22	22	27	592	572	246	40063	chr13	69700614	69701313	+	TTS (ENSMUST00000220876.1)	#NAME?	3152	ENSMUST00000220876.1	ENSMUST00000220876	ENSMUST00000220876	ENSMUSG00000113324	Gm48819	predicted gene, 48819 [Source:MGI Symbol;Acc:MGI:6098534]	13	69845930	69849014	1
chr16_21681707_21682359	4.01871	2.46678	300.951	2.04485e-67	1.26706e-64	chr16 21681707 21682359	0.680669	0.434132	0.860663	0.777586	11.9019	11.3411	11.2531	12	8	18	33	524	442	200	57413	chr16	21681708	21682359	+	intron (ENSMUST00000232634.1, intron 2 of 2)	-intron (ENSMUST00000053336.7, intron 1 of 1)	11198	ENSMUST00000232164.1	ENSMUST00000232164	ENSMUST00000232164	ENSMUSG00000043391	2510009E07Rik	RIKEN cDNA 2510009E07 gene [Source:MGI Symbol;Acc:MGI:1919440]	16	21467795	21513415	-1
chr15_74019234_74019967	6.12819	2.34352	300.817	2.18635e-67	1.34712e-64	chr15 74019234 74019967	0.113445	0.108533	0.334702	0.0942529	11.8792	13.4451	7.59581	2	2	7	4	523	524	135	53225	chr15	74019235	74019967	+	Intergenic	Intergenic	-18688	ENSMUST00000230277.1	ENSMUST00000230277	ENSMUST00000230277	ENSMUSG00000116256	Gm32405	predicted gene, 32405 [Source:MGI Symbol;Acc:MGI:5591564]	15	73865918	73872762	-1
chr12_75616102_75617284	3.89719	3.16076	300.139	3.07177e-67	1.8821e-64	chr12 75616102 75617284	1.7584	1.3024	1.09974	0.989655	20.215	20.4755	15.0228	31	24	23	42	890	798	267	32465	chr12	75616103	75617284	+	Intergenic	Intergenic	14625	ENSMUST00000238938.1	ENSMUST00000238938	ENSMUST00000238938	ENSMUSG00000118552	Rplp2-ps1	ribosomal protein lateral stalk subunit P2, pseudogene 1 [Source:MGI Symbol;Acc:MGI:3826366]	12	75677745	75678092	-1
chr8_8963410_8964259	5.38377	1.86785	299.831	3.5858e-67	2.18485e-64	chr8 8963410 8964259	0.22689	0.271333	0.0956292	0.164943	8.42671	7.95415	6.86436	4	5	2	7	371	310	122	135107	chr8	8963411	8964259	+	Intergenic	Intergenic	-31136	ENSMUST00000209045.1	ENSMUST00000209045	ENSMUST00000209045	ENSMUSG00000109346	Gm44515	predicted gene 44515 [Source:MGI Symbol;Acc:MGI:5753091]	8	8970937	8982699	-1
chr12_54399533_54400524	4.2351	2.37548	299.309	4.65913e-67	2.82315e-64	chr12 54399533 54400524	0.680669	0.488399	0.382517	0.683333	10.0621	11.5207	11.1405	12	9	8	29	443	449	198	31352	chr12	54399534	54400524	+	promoter-TSS (ENSMUST00000217924.1)	#NAME?	-147	ENSMUST00000217924.1	ENSMUST00000217924	ENSMUST00000217924	ENSMUSG00000112053	Gm46328	predicted gene, 46328 [Source:MGI Symbol;Acc:MGI:5825965]	12	54446962	54452440	1
chr5_89079689_89080376	3.83232	2.91487	298.551	6.81446e-67	4.10646e-64	chr5 89079689 89080376	0.850836	1.08533	0.908478	1.39023	15.9222	13.7017	17.6673	15	20	19	59	701	534	314	112369	chr5	89079690	89080376	+	intron (ENSMUST00000156238.7, intron 6 of 24)	-intron (ENSMUST00000113218.9, intron 6 of 24)	51941	ENSMUST00000134303.1	ENSMUST00000134303	ENSMUST00000134303	ENSMUSG00000060961	Slc4a4	solute carrier family 4 (anion exchanger), member 4 [Source:MGI Symbol;Acc:MGI:1927555]	5	89034345	89387512	1
chr15_59818298_59818767	5.52269	1.82664	297.748	1.01953e-66	6.11021e-64	chr15 59818298 59818767	0.113445	0.1628	0.191258	0.164943	8.5857	7.26137	6.8081	2	3	4	7	378	283	121	52373	chr15	59818299	59818767	+	Intergenic	Intergenic	-23574	ENSMUST00000228865.1	ENSMUST00000228865	ENSMUST00000228865	ENSMUSG00000115426	Gm19510	predicted gene, 19510 [Source:MGI Symbol;Acc:MGI:5011695]	15	59660266	59666808	-1
chr7_111283521_111284095	4.19451	2.87267	297.514	1.14673e-66	6.8352e-64	chr7 111283521 111284095	1.021	0.651198	0.765034	0.895402	18.5342	15.6774	11.872	18	12	16	38	816	611	211	132284	chr7	111283522	111284095	+	Intergenic	Intergenic	-82490	ENSMUST00000211799.1	ENSMUST00000211799	ENSMUST00000211799	ENSMUSG00000109808	5430402P08Rik	RIKEN cDNA 5430402P08 gene [Source:MGI Symbol;Acc:MGI:1918577]	7	110965505	110994815	1
chr5_17495861_17496343	4.35222	3.18386	297.461	1.17728e-66	6.97936e-64	chr5 17495861 17496343	1.24789	0.705465	1.29099	0.683333	16.4446	17.4991	24.7567	22	13	27	29	724	682	440	108364	chr5	17495862	17496343	+	Intergenic	Intergenic	2879	ENSMUST00000196224.1	ENSMUST00000196224	ENSMUST00000196224	ENSMUSG00000106358	Gm7047	predicted gene 7047 [Source:MGI Symbol;Acc:MGI:3643011]	5	17698221	17699283	1
chr1_54759774_54760353	4.98795	2.13031	297.339	1.25167e-66	7.38051e-64	chr1 54759774 54760353	0.340335	0.271333	0.478146	0.164943	10.3346	9.08312	8.43979	6	5	10	7	455	354	150	2473	chr1	54759775	54760353	+	TTS (ENSMUST00000180189.7)	#NAME?	3664	ENSMUST00000178226.2	ENSMUST00000178226	ENSMUST00000178226	ENSMUSG00000052331	Ankrd44	ankyrin repeat domain 44 [Source:MGI Symbol;Acc:MGI:3045243]	1	54684499	54965546	-1
chr11_33202522_33204180	3.27634	3.34636	295.674	2.88625e-66	1.69278e-63	chr11 33202522 33204180	1.70167	2.49626	2.53418	1.7908	20.6693	20.8347	19.7491	30	46	53	76	910	812	351	21283	chr11	33202523	33204180	+	promoter-TSS (ENSMUST00000131851.1)	#NAME?	238	ENSMUST00000037746.7	ENSMUST00000037746	ENSMUST00000037746	ENSMUSG00000040610	Tlx3	T cell leukemia, homeobox 3 [Source:MGI Symbol;Acc:MGI:1351209]	11	33150752	33153589	-1
chr8_24512441_24513839	3.03368	3.48824	295.27	3.53399e-66	2.06165e-63	chr8 24512441 24513839	2.60923	3.31026	2.34292	2.59195	21.8277	22.7848	21.7184	46	61	49	110	961	888	386	136034	chr8	24512442	24513839	+	Intergenic	Intergenic	6710	ENSMUST00000208727.1	ENSMUST00000208727	ENSMUST00000208727	ENSMUSG00000109237	9130214F15Rik	RIKEN cDNA 9130214F15 gene [Source:MGI Symbol;Acc:MGI:1924373]	8	24996446	24998098	1
chr14_121731356_121732297	3.50771	3.36865	295.115	3.81921e-66	2.21625e-63	chr14 121731356 121732297	1.92856	1.73653	1.38662	2.23851	21.5324	23.8368	17.9486	34	32	29	95	948	929	319	49489	chr14	121731357	121732297	+	intron (ENSMUST00000100299.10, intron 1 of 52)	-intron (ENSMUST00000100299.10, intron 1 of 52)	7034	ENSMUST00000212376.2	ENSMUST00000212376	ENSMUST00000212376	ENSMUSG00000025558	Dock9	dedicator of cytokinesis 9 [Source:MGI Symbol;Acc:MGI:106321]	14	121779458	122035249	-1
chr3_127849908_127850717	3.9268	3.31228	294.397	5.47766e-66	3.16191e-63	chr3 127849908 127850717	1.07773	1.68226	0.908478	1.69655	18.1254	19.4492	25.4882	19	31	19	72	798	758	453	96337	chr3	127849909	127850717	+	Intergenic	Intergenic	-11286	ENSMUST00000195996.1	ENSMUST00000195996	ENSMUST00000195996	ENSMUSG00000105550	Gm35585	predicted gene, 35585 [Source:MGI Symbol;Acc:MGI:5594744]	3	127655248	127658910	1
chr19_10165829_10166572	4.01145	2.50732	294.354	5.59556e-66	3.21305e-63	chr19 10165829 10166572	0.794114	0.542665	0.765034	0.777586	11.4476	13.2911	10.6341	14	10	16	33	504	518	189	73988	chr19	10165830	10166572	+	Intergenic	Intergenic	9960	ENSMUST00000235345.1	ENSMUST00000235345	ENSMUST00000235345	ENSMUSG00000117700	Gm50359	predicted gene, 50359 [Source:MGI Symbol;Acc:MGI:6303246]	19	10153218	10153525	-1
chr14_34843516_34844178	5.16603	1.99739	294.28	5.80755e-66	3.31741e-63	chr14 34843516 34844178	0.22689	0.379866	0.191258	0.188506	8.33585	7.56927	9.90269	4	7	4	8	367	295	176	45041	chr14	34843517	34844178	+	intron (ENSMUST00000043349.6, intron 2 of 15)	-intron (ENSMUST00000043349.6, intron 2 of 15)	23739	ENSMUST00000043349.6	ENSMUST00000043349	ENSMUST00000043349	ENSMUSG00000041078	Grid1	glutamate receptor, ionotropic, delta 1 [Source:MGI Symbol;Acc:MGI:95812]	14	34542065	35305336	1
chr12_111529052_111529678	3.97365	2.40973	294.029	6.58792e-66	3.74368e-63	chr12 111529052 111529678	0.680669	0.705465	0.573775	0.777586	11.6293	11.1358	10.184	12	13	12	33	512	434	181	35074	chr12	111529053	111529678	+	Intergenic	Intergenic	-8651	ENSMUST00000166123.8	ENSMUST00000166123	ENSMUST00000166123	ENSMUSG00000021282	Eif5	eukaryotic translation initiation factor 5 [Source:MGI Symbol;Acc:MGI:95309]	12	111504450	111513186	1
chr8_95593991_95594557	4.96546	2.19372	293.412	8.97489e-66	5.07382e-63	chr8 95593991 95594557	0.567224	0.217066	0.334702	0.212069	8.31314	10.6996	10.4091	10	4	7	9	366	417	185	140234	chr8	95593992	95594557	+	intron (ENSMUST00000212011.1, intron 1 of 3)	-intron (ENSMUST00000211925.1, intron 1 of 4)	752	ENSMUST00000212011.1	ENSMUST00000212011	ENSMUST00000212011	ENSMUSG00000110447	Gm31518	predicted gene, 31518 [Source:MGI Symbol;Acc:MGI:5590677]	8	96320050	96348137	1
chr5_30829594_30830269	3.26843	3.15013	293.013	1.09662e-65	6.16778e-63	chr5 30829594 30830269	1.98528	2.06213	1.67351	1.72011	17.7392	19.3722	16.0919	35	38	35	73	781	755	286	109253	chr5	30829595	30830269	+	intron (ENSMUST00000202256.1, intron 1 of 1)	-intron (ENSMUST00000031058.14, intron 1 of 6)	-7320	ENSMUST00000143488.1	ENSMUST00000143488	ENSMUST00000143488	ENSMUSG00000087258	Gm15461	predicted gene 15461 [Source:MGI Symbol;Acc:MGI:3705274]	5	30975321	30979956	-1
chr10_75129162_75129829	3.08024	3.3958	292.798	1.22161e-65	6.8357e-63	chr10 75129162 75129829	2.15545	2.55053	2.6298	2.47414	21.8958	21.8611	18.5675	38	47	55	105	964	852	330	15501	chr10	75129163	75129829	+	intron (ENSMUST00000164107.2, intron 2 of 22)	-intron (ENSMUST00000164107.2, intron 2 of 22)	-30864	ENSMUST00000218591.1	ENSMUST00000218591	ENSMUST00000218591	ENSMUSG00000009681	Bcr	BCR activator of RhoGEF and GTPase [Source:MGI Symbol;Acc:MGI:88141]	10	74896424	75020753	1
chr16_89585599_89586977	3.58333	2.82259	292.142	1.69803e-65	9.4534e-63	chr16 89585599 89586977	1.30462	1.41093	0.908478	1.20172	14.9001	15.2668	12.9973	23	26	19	51	656	595	231	61013	chr16	89585600	89586977	+	Intergenic	Intergenic	1753	ENSMUST00000231309.1	ENSMUST00000231309	ENSMUST00000231309	ENSMUSG00000116870	Gm49696	predicted gene, 49696 [Source:MGI Symbol;Acc:MGI:6215152]	16	89381423	89381886	1
chr18_52960879_52961413	5.41736	1.7378	291.97	1.85084e-65	1.02521e-62	chr18 52960879 52961413	0.113445	0.271333	0.143444	0.141379	7.08661	7.46664	6.69557	2	5	3	6	312	291	119	70964	chr18	52960880	52961413	+	Intergenic	Intergenic	8597	ENSMUST00000235787.1	ENSMUST00000235787	ENSMUST00000235787	ENSMUSG00000118195	Gm8572	predicted gene 8572 [Source:MGI Symbol;Acc:MGI:3647293]	18	53085621	53086173	1
chr17_73271644_73272373	3.90323	2.51422	291.913	1.90466e-65	1.04972e-62	chr17 73271644 73272373	0.567224	1.03106	0.765034	0.777586	12.288	12.2904	10.7467	10	19	16	33	541	479	191	66626	chr17	73271645	73272373	+	Intergenic	Intergenic	19464	ENSMUST00000233479.1	ENSMUST00000233479	ENSMUST00000233479	ENSMUSG00000117292	E330032C10Rik	RIKEN cDNA E330032C10 gene [Source:MGI Symbol;Acc:MGI:4437727]	17	73557981	73567651	1
chr3_8162168_8162831	4.85974	1.90154	291.372	2.49757e-65	1.3696e-62	chr3 8162168 8162831	0.170167	0.325599	0.191258	0.329885	8.13143	8.1081	7.42702	3	6	4	14	358	316	132	89760	chr3	8162169	8162831	+	Intergenic	Intergenic	-51832	ENSMUST00000195642.1	ENSMUST00000195642	ENSMUST00000195642	ENSMUSG00000103725	Gm7103	predicted gene 7103 [Source:MGI Symbol;Acc:MGI:3646860]	3	8279392	8281243	1
chr4_8965483_8966080	4.7109	2.26687	291.137	2.81056e-65	1.53358e-62	chr4 8965483 8966080	0.623947	0.434132	0.382517	0.235632	10.9479	10.6996	8.77738	11	8	8	10	482	417	156	98558	chr4	8965484	8966080	+	Intergenic	Intergenic	24523	ENSMUST00000119493.1	ENSMUST00000119493	ENSMUST00000119493	ENSMUSG00000083786	Rps18-ps2	ribosomal protein S18, pseudogene 2 [Source:MGI Symbol;Acc:MGI:3652274]	4	8941259	8941656	1
chr9_85617302_85618120	3.2878	3.0785	290.96	3.07177e-65	1.66781e-62	chr9 85617302 85618120	1.30462	1.95359	1.86477	1.76724	15.8994	17.2682	17.7798	23	36	39	75	700	673	316	148117	chr9	85617303	85618120	+	Intergenic	Intergenic	21856	ENSMUST00000213802.1	ENSMUST00000213802	ENSMUST00000213802	ENSMUSG00000111386	Gm48842	predicted gene, 48842 [Source:MGI Symbol;Acc:MGI:6098574]	9	85519342	85521620	-1
chr15_74000594_74001300	5.00374	2.25865	290.644	3.59862e-65	1.94423e-62	chr15 74000594 74001300	0.340335	0.271333	0.382517	0.282759	10.9933	11.726	7.70834	6	5	8	12	484	457	137	53222	chr15	74000595	74001300	+	promoter-TSS (ENSMUST00000230277.1)	#NAME?	-34	ENSMUST00000230277.1	ENSMUST00000230277	ENSMUST00000230277	ENSMUSG00000116256	Gm32405	predicted gene, 32405 [Source:MGI Symbol;Acc:MGI:5591564]	15	73865918	73872762	-1
chr13_93866412_93867133	4.59023	2.16013	290.432	4.00266e-65	2.15192e-62	chr13 93866412 93867133	0.623947	0.379866	0.286888	0.329885	10.1756	8.46732	9.67763	11	7	6	14	448	330	172	41061	chr13	93866413	93867133	+	intron (ENSMUST00000091403.5, intron 5 of 7)	-intron (ENSMUST00000091403.5, intron 5 of 7)	56538	ENSMUST00000175365.1	ENSMUST00000175365	ENSMUST00000175365	NA	NA	NA	NA	NA	NA	NA
chr5_25875693_25876621	5.59185	1.81608	289.93	5.1509e-65	2.75573e-62	chr5 25875693 25876621	0.283612	0.1628	0.0478146	0.141379	7.47274	8.46732	6.52677	5	3	1	6	329	330	116	108958	chr5	25875694	25876621	+	Intergenic	Intergenic	50058	ENSMUST00000167847.2	ENSMUST00000167847	ENSMUST00000167847	ENSMUSG00000105052	Gm21655	predicted gene, 21655 [Source:MGI Symbol;Acc:MGI:5435010]	5	26124630	26131288	-1
chr19_48524457_48525111	4.61722	2.31172	289.79	5.52559e-65	2.94184e-62	chr19 48524457 48525111	0.680669	0.488399	0.191258	0.400575	9.88037	9.69893	12.2658	12	9	4	17	435	378	218	76822	chr19	48524458	48525111	+	intron (ENSMUST00000236094.1, intron 3 of 6)	-intron (ENSMUST00000078880.5, intron 3 of 26)	94824	ENSMUST00000236094.1	ENSMUST00000236094	ENSMUST00000236094	ENSMUSG00000063434	Sorcs3	sortilin-related VPS10 domain containing receptor 3 [Source:MGI Symbol;Acc:MGI:1913923]	19	48194464	48793944	1
chr4_131450170_131450873	5.15637	2.5498	288.786	9.14069e-65	4.84302e-62	chr4 131450170 131450873	0.340335	0.325599	0.143444	0.494828	14.4458	14.3688	8.88991	6	6	3	21	636	560	158	105255	chr4	131450171	131450873	+	Intergenic	Intergenic	-36675	ENSMUST00000149942.1	ENSMUST00000149942	ENSMUST00000149942	ENSMUSG00000078531	Gm831	predicted gene 831 [Source:MGI Symbol;Acc:MGI:2685677]	4	131214508	131232838	1
chr3_145701879_145702420	5.75449	1.77653	288.71	9.49866e-65	5.00849e-62	chr3 145701879 145702420	0.0567224	0.325599	0.0956292	0.0942529	6.58691	7.41532	8.21473	1	6	2	4	290	289	146	97400	chr3	145701880	145702420	+	Intergenic	Intergenic	37016	ENSMUST00000198263.1	ENSMUST00000198263	ENSMUST00000198263	ENSMUSG00000105608	Gm43408	predicted gene 43408 [Source:MGI Symbol;Acc:MGI:5663545]	3	145444482	145444921	-1
chr1_133753307_133754016	4.52312	2.15252	288.533	1.038e-64	5.44704e-62	chr1 133753307 133754016	0.510502	0.325599	0.382517	0.400575	8.92641	10.6226	8.43979	9	6	8	17	393	414	150	6812	chr1	133753308	133754016	+	promoter-TSS (ENSMUST00000048953.13)	#NAME?	19	ENSMUST00000125659.7	ENSMUST00000125659	ENSMUST00000125659	ENSMUSG00000026463	Atp2b4	ATPase, Ca++ transporting, plasma membrane 4 [Source:MGI Symbol;Acc:MGI:88111]	1	133627195	133728779	-1
chr5_37863053_37863666	4.37794	2.43862	288.291	1.17175e-64	6.1196e-62	chr5 37863053 37863666	0.680669	0.868264	0.286888	0.447701	12.5379	11.1871	10.4091	12	16	6	19	552	436	185	109955	chr5	37863054	37863666	+	Intergenic	Intergenic	-30412	ENSMUST00000200831.1	ENSMUST00000200831	ENSMUST00000200831	ENSMUSG00000106718	Gm20052	predicted gene, 20052 [Source:MGI Symbol;Acc:MGI:5012237]	5	38051116	38055261	1
chr16_22398440_22399040	4.78435	2.06113	287.639	1.62525e-64	8.44782e-62	chr16 22398440 22399040	0.397057	0.271333	0.430332	0.235632	9.06269	7.8002	9.79016	7	5	9	10	399	304	174	57484	chr16	22398441	22399040	+	intron (ENSMUST00000168774.7, intron 9 of 12)	-intron (ENSMUST00000079601.12, intron 9 of 12)	3089	ENSMUST00000170803.1	ENSMUST00000170803	ENSMUST00000170803	ENSMUSG00000013089	Etv5	ets variant 5 [Source:MGI Symbol;Acc:MGI:1096867]	16	22200059	22258469	-1
chr13_45990308_45990970	4.39698	2.88664	287.419	1.81486e-64	9.38893e-62	chr13 45990308 45990970	0.680669	1.24813	0.382517	0.706896	18.6705	15.5234	12.7722	12	23	8	30	822	605	227	38345	chr13	45990309	45990970	+	Intergenic	Intergenic	25288	ENSMUST00000189843.1	ENSMUST00000189843	ENSMUST00000189843	ENSMUSG00000038152	5033430I15Rik	RIKEN cDNA 5033430I15 gene [Source:MGI Symbol;Acc:MGI:1923250]	13	46118656	46120901	1
chr10_74677497_74679320	3.93747	2.921	287.324	1.90435e-64	9.80563e-62	chr10 74677497 74679320	1.47478	1.19386	0.908478	0.73046	13.8325	15.8313	17.8924	26	22	19	31	609	617	318	15458	chr10	74677498	74679320	+	Intergenic	Intergenic	46575	ENSMUST00000192370.1	ENSMUST00000192370	ENSMUST00000192370	ENSMUSG00000052613	Pcdh15	protocadherin 15 [Source:MGI Symbol;Acc:MGI:1891428]	10	72935174	74485569	1
chr7_105531490_105532372	3.51945	2.74548	286.119	3.48422e-64	1.78566e-61	chr7 105531490 105532372	1.30462	1.08533	1.09974	1.22529	14.4231	14.0609	12.2096	23	20	23	52	635	548	217	131967	chr7	105531491	105532372	+	Intergenic	Intergenic	-22429	ENSMUST00000046983.9	ENSMUST00000046983	ENSMUST00000046983	ENSMUSG00000037049	Smpd1	sphingomyelin phosphodiesterase 1, acid lysosomal [Source:MGI Symbol;Acc:MGI:98325]	7	105203567	105207596	1
chrX_135738682_135739260	4.56521	1.98543	285.793	4.10403e-64	2.09353e-61	chrX 135738682 135739260	0.453779	0.434132	0.286888	0.282759	8.29043	8.21073	8.43979	8	8	6	12	365	320	150	153470	chrX	135738683	135739260	+	Intergenic	Intergenic	-3762	ENSMUST00000113144.7	ENSMUST00000113144	ENSMUST00000113144	ENSMUSG00000043384	Gprasp1	G protein-coupled receptor associated sorting protein 1 [Source:MGI Symbol;Acc:MGI:1917418]	X	134643482	134704223	1
chr12_27258741_27260370	4.69532	2.26667	285.776	4.13986e-64	2.10203e-61	chr12 27258741 27260370	0.794114	0.108533	0.239073	0.424138	10.5618	9.9042	10.2403	14	2	5	18	465	386	182	29998	chr12	27258742	27260370	+	Intergenic	Intergenic	3950	ENSMUST00000221503.1	ENSMUST00000221503	ENSMUST00000221503	ENSMUSG00000114083	Gm47860	predicted gene, 47860 [Source:MGI Symbol;Acc:MGI:6097075]	12	27313154	27313505	-1
chr15_101092940_101093591	5.59996	2.74468	285.448	4.87887e-64	2.46585e-61	chr15 101092940 101093591	0.113445	0.651198	0.430332	0.117816	17.3304	15.78	10.5216	2	12	9	5	763	615	187	55830	chr15	101092941	101093591	+	Intergenic	Intergenic	-14699	ENSMUST00000213610.1	ENSMUST00000213610	ENSMUST00000213610	ENSMUSG00000095440	Fignl2	fidgetin-like 2 [Source:MGI Symbol;Acc:MGI:3646919]	15	100948075	100976448	-1
chr8_47390538_47391209	4.1081	2.59324	284.962	6.22834e-64	3.13345e-61	chr8 47390538 47391209	0.737391	0.813998	0.525961	0.801149	12.2199	14.9076	10.5779	13	15	11	34	538	581	188	137467	chr8	47390539	47391209	+	intron (ENSMUST00000181417.1, intron 7 of 7)	-intron (ENSMUST00000181417.1, intron 7 of 7)	22963	ENSMUST00000211882.1	ENSMUST00000211882	ENSMUST00000211882	ENSMUSG00000038143	Stox2	storkhead box 2 [Source:MGI Symbol;Acc:MGI:1918319]	8	47633083	47899397	-1
chr3_120015307_120015973	5.14413	1.88912	284.444	8.07751e-64	4.04521e-61	chr3 120015307 120015973	0.0567224	0.217066	0.334702	0.235632	7.04118	7.90283	8.94618	1	4	7	10	310	308	159	95809	chr3	120015308	120015973	+	Intergenic	Intergenic	46909	ENSMUST00000195974.1	ENSMUST00000195974	ENSMUST00000195974	ENSMUSG00000104726	Gm18384	predicted gene, 18384 [Source:MGI Symbol;Acc:MGI:5010569]	3	119762380	119763187	1
chr16_91905395_91905955	4.63965	2.01797	283.811	1.1093e-63	5.5301e-61	chr16 91905395 91905955	0.170167	0.434132	0.334702	0.377011	7.7453	9.08312	8.88991	3	8	7	16	341	354	158	61264	chr16	91905396	91905955	+	intron (ENSMUST00000232198.1, intron 2 of 6)	-intron (ENSMUST00000064797.11, intron 35 of 39)	1604	ENSMUST00000231735.1	ENSMUST00000231735	ENSMUST00000231735	ENSMUSG00000022957	Itsn1	intersectin 1 (SH3 domain protein 1A) [Source:MGI Symbol;Acc:MGI:1338069]	16	91526169	91717485	1
chr13_10684377_10684865	5.3639	1.91605	283.514	1.2878e-63	6.3909e-61	chr13 10684377 10684865	0.397057	0.0542665	0.191258	0.164943	6.99576	8.08244	9.3963	7	1	4	7	308	315	167	36116	chr13	10684378	10684865	+	intron (ENSMUST00000222633.1, intron 8 of 10)	-intron (ENSMUST00000220536.1, intron 4 of 7)	-15540	ENSMUST00000221855.1	ENSMUST00000221855	ENSMUST00000221855	ENSMUSG00000114134	Gm47408	predicted gene, 47408 [Source:MGI Symbol;Acc:MGI:6096341]	13	10750197	10880814	1
chr18_57671680_57672098	5.18471	1.83523	283.268	1.45692e-63	7.19766e-61	chr18 57671680 57672098	0.0567224	0.1628	0.191258	0.306322	6.99576	7.6719	8.32726	1	3	4	13	308	299	148	71374	chr18	57671681	57672098	+	intron (ENSMUST00000123872.1, intron 5 of 5)	-intron (ENSMUST00000079738.9, intron 6 of 6)	-2331	ENSMUST00000158151.1	ENSMUST00000158151	ENSMUST00000158151	ENSMUSG00000088776	Gm26038	predicted gene, 26038 [Source:MGI Symbol;Acc:MGI:5455815]	18	57802525	57802630	-1
chr13_26574562_26575146	5.50565	1.71059	283.255	1.46636e-63	7.21179e-61	chr13 26574562 26575146	0.113445	0.108533	0.143444	0.188506	6.95033	7.69756	6.18918	2	2	3	8	306	300	110	36989	chr13	26574563	26575146	+	Intergenic	Intergenic	82300	ENSMUST00000180940.1	ENSMUST00000180940	ENSMUST00000180940	ENSMUSG00000060198	Gm11353	predicted gene 11353 [Source:MGI Symbol;Acc:MGI:3649794]	13	26676537	26677163	1
chr10_44642528_44643144	4.03871	2.38082	283.215	1.49636e-63	7.32648e-61	chr10 44642528 44643144	0.964281	0.542665	0.62159	0.565517	11.2205	10.0838	11.1405	17	10	13	24	494	393	198	13726	chr10	44642529	44643144	+	intron (ENSMUST00000217008.1, intron 2 of 3)	-intron (ENSMUST00000214824.1, intron 1 of 3)	-4682	ENSMUST00000217458.1	ENSMUST00000217458	ENSMUST00000217458	ENSMUSG00000111034	Gm48066	predicted gene, 48066 [Source:MGI Symbol;Acc:MGI:6097394]	10	44523514	44538492	1
chr1_165611404_165612129	3.58724	2.76456	282.952	1.70769e-63	8.32402e-61	chr1 165611404 165612129	1.36134	0.759731	1.24318	1.20172	13.1965	14.9333	13.4474	24	14	26	51	581	582	239	8812	chr1	165611405	165612129	+	intron (ENSMUST00000194437.5, intron 1 of 2)	-intron (ENSMUST00000068705.12, intron 1 of 4)	-1149	ENSMUST00000194829.5	ENSMUST00000194829	ENSMUST00000194829	ENSMUSG00000026566	Mpzl1	myelin protein zero-like 1 [Source:MGI Symbol;Acc:MGI:1915731]	1	165419809	165462107	-1
chr9_29666443_29667125	3.49662	2.87527	281.536	3.47515e-63	1.68645e-60	chr9 29666443 29667125	1.36134	1.73653	1.05192	1.20172	13.7644	14.9846	16.0356	24	32	22	51	606	584	285	143743	chr9	29666444	29667125	+	intron (ENSMUST00000152513.1, intron 1 of 2)	-intron (ENSMUST00000075069.10, intron 1 of 7)	-74274	ENSMUST00000141752.1	ENSMUST00000141752	ENSMUST00000141752	ENSMUSG00000085638	Gm15521	predicted gene 15521 [Source:MGI Symbol;Acc:MGI:3782968]	9	29501780	29503806	-1
chr4_8956708_8957275	4.06618	2.32381	281.448	3.63136e-63	1.75449e-60	chr4 8956708 8957275	0.453779	0.542665	0.908478	0.565517	10.7662	10.2121	10.184	8	10	19	24	474	398	181	98557	chr4	8956709	8957275	+	Intergenic	Intergenic	15733	ENSMUST00000119493.1	ENSMUST00000119493	ENSMUST00000119493	ENSMUSG00000083786	Rps18-ps2	ribosomal protein S18, pseudogene 2 [Source:MGI Symbol;Acc:MGI:3652274]	4	8941259	8941656	1
chr1_49698795_49699648	4.05805	2.51856	281.242	4.0273e-63	1.93725e-60	chr1 49698795 49699648	0.567224	0.542665	0.765034	0.871839	12.1517	10.3147	13.6725	10	10	16	37	535	402	243	2172	chr1	49698796	49699648	+	Intergenic	Intergenic	-119636	ENSMUST00000186262.1	ENSMUST00000186262	ENSMUST00000186262	ENSMUSG00000099882	Gm28388	predicted gene 28388 [Source:MGI Symbol;Acc:MGI:5579094]	1	49618309	49618745	-1
chr16_28978990_28979536	6.14785	1.92084	281.199	4.11474e-63	1.97067e-60	chr16 28978990 28979536	0.22689	0.108533	0.0956292	0.0706896	7.72259	6.6199	10.6904	4	2	2	3	340	258	190	57911	chr16	28978991	28979536	+	Intergenic	Intergenic	-27908	ENSMUST00000232466.1	ENSMUST00000232466	ENSMUST00000232466	ENSMUSG00000116861	Gm8253	predicted gene 8253 [Source:MGI Symbol;Acc:MGI:3647612]	16	28769675	28770107	-1
chr12_16664728_16665527	3.40279	3.29507	280.715	5.24461e-63	2.50088e-60	chr12 16664728 16665527	1.41806	1.35666	2.39073	2.19138	20.0106	18.7307	21.2683	25	25	50	93	881	730	378	29499	chr12	16664729	16665527	+	Intergenic	Intergenic	-7112	ENSMUST00000223113.1	ENSMUST00000223113	ENSMUST00000223113	ENSMUSG00000114049	Gm48140	predicted gene, 48140 [Source:MGI Symbol;Acc:MGI:6097506]	12	16722241	16735014	1
chr10_34316631_34317490	3.38261	3.53916	280.673	5.35825e-63	2.54401e-60	chr10 34316631 34317490	2.38234	1.73653	2.05603	2.73333	19.4655	25.2223	26.5572	42	32	43	116	857	983	472	12975	chr10	34316632	34317490	+	intron (ENSMUST00000130290.1, intron 7 of 10)	-intron (ENSMUST00000047885.13, intron 8 of 11)	-3378	ENSMUST00000129363.7	ENSMUST00000129363	ENSMUST00000129363	ENSMUSG00000039480	Nt5dc1	5'-nucleotidase domain containing 1 [Source:MGI Symbol;Acc:MGI:2442446]	10	34164284	34294548	-1
chr12_12746741_12747428	4.39664	2.17947	280.473	5.92234e-63	2.78769e-60	chr12 12746741 12747428	0.680669	0.271333	0.286888	0.518391	8.94912	10.1608	9.45257	12	5	6	22	394	396	168	29287	chr12	12746742	12747428	+	Intergenic	Intergenic	24224	ENSMUST00000222770.1	ENSMUST00000222770	ENSMUST00000222770	ENSMUSG00000113009	3732407C23Rik	RIKEN cDNA 3732407C23 gene [Source:MGI Symbol;Acc:MGI:1921264]	12	12772862	12776401	1
chr1_9761988_9762792	4.53405	1.99661	280.475	5.91543e-63	2.78769e-60	chr1 9761988 9762792	0.453779	0.325599	0.191258	0.424138	8.06329	8.44166	8.72112	8	6	4	18	355	329	155	247	chr1	9761989	9762792	+	intron (ENSMUST00000207445.1, intron 3 of 4)	-intron (ENSMUST00000181358.7, intron 2 of 6)	13764	ENSMUST00000209020.1	ENSMUST00000209020	ENSMUST00000209020	ENSMUSG00000097893	1700034P13Rik	RIKEN cDNA 1700034P13 gene [Source:MGI Symbol;Acc:MGI:1920581]	1	9817873	9862152	1
chr5_24314990_24315735	4.20998	2.35303	279.662	8.89608e-63	4.16956e-60	chr5 24314990 24315735	0.680669	0.651198	0.239073	0.683333	10.1529	10.443	11.6469	12	12	5	29	447	407	207	108788	chr5	24314991	24315735	+	Intergenic	Intergenic	6891	ENSMUST00000129246.1	ENSMUST00000129246	ENSMUST00000129246	ENSMUSG00000038319	Kcnh2	potassium voltage-gated channel, subfamily H (eag-related), member 2 [Source:MGI Symbol;Acc:MGI:1341722]	5	24524587	24556602	-1
chr10_126512062_126512742	5.7823	1.83239	279.564	9.34796e-63	4.36271e-60	chr10 126512062 126512742	0.113445	0.271333	0.191258	0.0471264	6.85948	9.00615	6.97689	2	5	4	2	302	351	124	19185	chr10	126512063	126512742	+	Intergenic	Intergenic	74402	ENSMUST00000220216.1	ENSMUST00000220216	ENSMUST00000220216	ENSMUSG00000112435	Gm47965	predicted gene, 47965 [Source:MGI Symbol;Acc:MGI:6097244]	10	126422559	126422673	-1
chr5_56265148_56265621	5.22733	2.00909	279.059	1.20425e-62	5.59647e-60	chr5 56265148 56265621	0.340335	0.271333	0.239073	0.141379	7.13204	8.77522	10.184	6	5	5	6	314	342	181	110827	chr5	56265149	56265621	+	Intergenic	Intergenic	108047	ENSMUST00000198120.1	ENSMUST00000198120	ENSMUST00000198120	ENSMUSG00000105685	Gm43315	predicted gene 43315 [Source:MGI Symbol;Acc:MGI:5663452]	5	56314680	56314992	1
chr19_4684098_4684916	4.09076	2.44181	278.514	1.58308e-62	7.32594e-60	chr19 4684098 4684916	0.567224	0.488399	0.860663	0.683333	12.6968	11.4694	9.62136	10	9	18	29	559	447	171	73578	chr19	4684099	4684916	+	intron (ENSMUST00000225896.1, intron 3 of 15)	-intron (ENSMUST00000096325.4, intron 3 of 9)	4392	ENSMUST00000236726.1	ENSMUST00000236726	ENSMUST00000236726	ENSMUSG00000117746	Gm50372	predicted gene, 50372 [Source:MGI Symbol;Acc:MGI:6303266]	19	4730143	4730644	1
chr8_70618668_70619385	4.95245	2.43455	278.16	1.89019e-62	8.71037e-60	chr8 70618668 70619385	0.22689	0.596932	0.430332	0.282759	14.8092	10.1864	9.5651	4	11	9	12	652	397	170	138459	chr8	70618669	70619385	+	intron (ENSMUST00000052437.5, intron 2 of 2)	-intron (ENSMUST00000052437.5, intron 2 of 2)	2183	ENSMUST00000052437.5	ENSMUST00000052437	ENSMUST00000052437	ENSMUSG00000049988	Lrrc25	leucine rich repeat containing 25 [Source:MGI Symbol;Acc:MGI:2445284]	8	71068805	71074133	1
chr10_28237206_28237871	4.87701	1.82789	277.996	2.05241e-62	9.41831e-60	chr10 28237206 28237871	0.22689	0.217066	0.286888	0.259195	6.99576	8.26205	7.20196	4	4	6	11	308	322	128	12749	chr10	28237207	28237871	+	intron (ENSMUST00000219761.1, intron 2 of 2)	-intron (ENSMUST00000166468.1, intron 2 of 31)	-23418	ENSMUST00000102422.1	ENSMUST00000102422	ENSMUST00000102422	ENSMUSG00000076377	Gm54624	predicted gene, 54624 [Source:MGI Symbol;Acc:MGI:6845726]	16	55890926	55891029	1
chr15_61884707_61885201	4.8919	2.08963	277.674	2.41303e-62	1.1027e-59	chr15 61884707 61885201	0.22689	0.271333	0.430332	0.282759	8.76741	7.69756	11.028	4	5	9	12	386	300	196	52461	chr15	61884708	61885201	+	Intergenic	Intergenic	58707	ENSMUST00000229370.1	ENSMUST00000229370	ENSMUST00000229370	ENSMUSG00000116017	Gm18154	predicted gene, 18154 [Source:MGI Symbol;Acc:MGI:5010339]	15	61698096	61698684	1
chr17_26472154_26472683	5.76129	2.4029	277.441	2.71145e-62	1.23393e-59	chr17 26472154 26472683	0.170167	0.0542665	0.286888	0.259195	13.2647	13.599	7.31449	3	1	6	11	584	530	130	63369	chr17	26472155	26472683	+	intron (ENSMUST00000235705.1, intron 1 of 2)	-intron (ENSMUST00000235705.1, intron 1 of 2)	-8262	ENSMUST00000236943.1	ENSMUST00000236943	ENSMUST00000236943	ENSMUSG00000118232	Gm50269	predicted gene, 50269 [Source:MGI Symbol;Acc:MGI:6303095]	17	26668362	26683131	-1
chr18_65750180_65751068	3.55542	2.61277	276.901	3.55634e-62	1.61174e-59	chr18 65750180 65751068	0.964281	1.24813	1.00411	1.01322	12.606	13.1885	11.3093	17	23	21	43	555	514	201	71953	chr18	65750181	65751068	+	TTS (ENSMUST00000134343.1)	#NAME?	1610	ENSMUST00000134343.1	ENSMUST00000134343	ENSMUST00000134343	ENSMUSG00000046610	Oacyl	O-acyltransferase like [Source:MGI Symbol;Acc:MGI:2442915]	18	65831339	65884672	1
chr11_4605442_4605891	5.44419	2.2158	276.37	4.64124e-62	2.09477e-59	chr11 4605442 4605891	0.397057	0.325599	0.0478146	0.188506	12.0609	10.2891	7.37075	7	6	1	8	531	401	131	19695	chr11	4605443	4605891	+	Intergenic	Intergenic	-10804	ENSMUST00000130716.7	ENSMUST00000130716	ENSMUST00000130716	ENSMUSG00000034354	Mtmr3	myotubularin related protein 3 [Source:MGI Symbol;Acc:MGI:1921552]	11	4430867	4544863	-1
chr3_68659213_68659930	5.34047	2.04768	276.343	4.70584e-62	2.11522e-59	chr3 68659213 68659930	0.170167	0.1628	0.191258	0.282759	7.13204	8.7239	11.2531	3	3	4	12	314	340	200	92692	chr3	68659214	68659930	+	Intergenic	Intergenic	-31072	ENSMUST00000029345.11	ENSMUST00000029345	ENSMUST00000029345	ENSMUSG00000027776	Il12a	interleukin 12a [Source:MGI Symbol;Acc:MGI:96539]	3	68597977	68605880	1
chr18_66236228_66236971	4.6003	2.06107	276.261	4.9028e-62	2.19475e-59	chr18 66236228 66236971	0.283612	0.108533	0.382517	0.518391	9.15354	8.64693	8.66485	5	2	8	22	403	337	154	71994	chr18	66236229	66236971	+	intron (ENSMUST00000146610.1, intron 1 of 9)	-intron (ENSMUST00000061103.13, intron 2 of 11)	-17267	ENSMUST00000102193.1	ENSMUST00000102193	ENSMUST00000102193	ENSMUSG00000076147	Mir694	microRNA 694 [Source:MGI Symbol;Acc:MGI:3629943]	18	66352335	66352404	-1
chr2_146075338_146075792	5.78456	1.71956	275.952	5.72322e-62	2.5516e-59	chr2 146075338 146075792	0.170167	0.0542665	0.286888	0.0471264	6.60963	7.87717	6.58304	3	1	6	2	291	307	117	86610	chr2	146075339	146075792	+	intron (ENSMUST00000144066.7, intron 1 of 10)	-intron (ENSMUST00000125223.1, intron 1 of 6)	28314	ENSMUST00000144066.7	ENSMUST00000144066	ENSMUST00000144066	ENSMUSG00000037143	Cfap61	cilia and flagella associated protein 61 [Source:MGI Symbol;Acc:MGI:1926024]	2	145776704	146056959	1
chr12_119475757_119476522	4.9887	2.65238	275.654	6.64695e-62	2.95143e-59	chr12 119475757 119476522	0.283612	0.325599	0.286888	0.65977	11.5385	11.6233	18.3425	5	6	6	28	508	453	326	35659	chr12	119475758	119476522	+	Intergenic	Intergenic	32730	ENSMUST00000048880.6	ENSMUST00000048880	ENSMUST00000048880	ENSMUSG00000041886	Macc1	metastasis associated in colon cancer 1 [Source:MGI Symbol;Acc:MGI:2685113]	12	119278005	119433722	1
chr15_36701731_36702456	3.70162	3.01698	275.325	7.84083e-62	3.45358e-59	chr15 36701731 36702456	1.36134	1.41093	1.14755	1.22529	17.4667	19.5005	12.7722	24	26	24	52	769	760	227	51190	chr15	36701732	36702456	+	Intergenic	Intergenic	-6429	ENSMUST00000226482.1	ENSMUST00000226482	ENSMUST00000226482	ENSMUSG00000115127	Gm46515	predicted gene, 46515 [Source:MGI Symbol;Acc:MGI:5826152]	15	36633013	36695909	-1
chr5_121623582_121624055	5.14812	2.56974	275.329	7.82574e-62	3.45358e-59	chr5 121623582 121624055	0.22689	0.542665	0.191258	0.424138	15.8313	13.6503	8.66485	4	10	4	18	697	532	154	115138	chr5	121623583	121624055	+	TTS (ENSMUST00000133775.7)	#NAME?	-4881	ENSMUST00000111776.5	ENSMUST00000111776	ENSMUST00000111776	ENSMUSG00000042647	Acad12	acyl-Coenzyme A dehydrogenase family, member 12 [Source:MGI Symbol;Acc:MGI:2443320]	5	121734838	121757001	-1
chr5_35835296_35835905	5.20553	1.9164	275.186	8.40883e-62	3.68896e-59	chr5 35835296 35835905	0.113445	0.108533	0.239073	0.306322	6.74591	8.44166	9.28377	2	2	5	13	297	329	165	109745	chr5	35835297	35835905	+	intron (ENSMUST00000151636.7, intron 2 of 7)	-intron (ENSMUST00000054598.11, intron 9 of 19)	-5753	ENSMUST00000125378.1	ENSMUST00000125378	ENSMUST00000125378	ENSMUSG00000029095	Ablim2	actin-binding LIM protein 2 [Source:MGI Symbol;Acc:MGI:2385758]	5	35915224	36042317	1
chr9_75263901_75264522	3.82824	2.65975	274.574	1.14321e-61	4.99528e-59	chr9 75263901 75264522	0.453779	1.24813	0.812849	1.06034	12.7423	12.5983	14.0101	8	23	17	45	561	491	249	147466	chr9	75263902	75264522	+	intron (ENSMUST00000216788.1, intron 13 of 29)	-intron (ENSMUST00000036555.7, intron 12 of 40)	8349	ENSMUST00000215352.1	ENSMUST00000215352	ENSMUST00000215352	ENSMUSG00000033590	Myo5c	myosin VC [Source:MGI Symbol;Acc:MGI:2442485]	9	75139302	75212733	1
chr10_91698212_91698808	4.70978	1.91435	274.221	1.36438e-61	5.93801e-59	chr10 91698212 91698808	0.170167	0.325599	0.334702	0.329885	8.81284	7.13307	7.87714	3	6	7	14	388	278	140	16946	chr10	91698213	91698808	+	Intergenic	Intergenic	-57620	ENSMUST00000216093.1	ENSMUST00000216093	ENSMUST00000216093	ENSMUSG00000111782	Gm47091	predicted gene, 47091 [Source:MGI Symbol;Acc:MGI:6095821]	10	91476564	91476752	-1
chr8_17970692_17972113	2.8875	4.04479	273.542	1.91821e-61	8.31541e-59	chr8 17970692 17972113	4.42435	4.93825	3.72954	4.35919	28.7326	29.8409	38.4854	78	91	78	185	1265	1163	684	135749	chr8	17970693	17972113	+	Intergenic	Intergenic	303418	ENSMUST00000157695.1	ENSMUST00000157695	ENSMUST00000157695	ENSMUSG00000088320	Gm25665	predicted gene, 25665 [Source:MGI Symbol;Acc:MGI:5455442]	8	18324728	18324837	-1
chr9_110124081_110124713	4.62004	1.88291	272.574	3.11902e-61	1.34676e-58	chr9 110124081 110124713	0.22689	0.325599	0.334702	0.329885	8.49485	7.38966	7.25822	4	6	7	14	374	288	129	149704	chr9	110124082	110124713	+	intron (ENSMUST00000098355.5, intron 1 of 3)	-intron (ENSMUST00000098355.5, intron 1 of 3)	-2581	ENSMUST00000196828.1	ENSMUST00000196828	ENSMUST00000196828	ENSMUSG00000105187	Gm23377	predicted gene, 23377 [Source:MGI Symbol;Acc:MGI:5453154]	9	109950747	109950884	-1
chr10_82768934_82769445	4.24938	2.44044	272.4	3.40249e-61	1.4634e-58	chr10 82768934 82769445	0.850836	0.759731	0.334702	0.518391	10.4936	13.1885	10.3528	15	14	7	22	462	514	184	16277	chr10	82768935	82769445	+	TTS (ENSMUST00000218794.1)	#NAME?	715	ENSMUST00000218794.1	ENSMUST00000218794	ENSMUST00000218794	ENSMUSG00000112107	Gm47560	predicted gene, 47560 [Source:MGI Symbol;Acc:MGI:6096583]	10	82605578	82605739	-1
chr7_25301118_25301367	3.92525	2.21168	272.279	3.61571e-61	1.54903e-58	chr7 25301118 25301367	0.737391	0.542665	0.573775	0.636207	9.94851	9.26273	9.34004	13	10	12	27	438	361	166	127139	chr7	25301119	25301367	+	promoter-TSS (ENSMUST00000080288.4)	#NAME?	-168	ENSMUST00000080288.4	ENSMUST00000080288	ENSMUST00000080288	ENSMUSG00000058741	Prr19	proline rich 19 [Source:MGI Symbol;Acc:MGI:3648539]	7	25000836	25003557	1
chr13_50595280_50596030	4.77472	1.89917	272.129	3.89866e-61	1.66376e-58	chr13 50595280 50596030	0.340335	0.1628	0.143444	0.400575	7.51817	7.72322	8.55232	6	3	3	17	331	301	152	38665	chr13	50595281	50596030	+	Intergenic	Intergenic	5425	ENSMUST00000102099.2	ENSMUST00000102099	ENSMUST00000102099	NA	NA	NA	NA	NA	NA	NA
chr13_94617108_94617848	4.47887	2.31385	271.832	4.52452e-61	1.92336e-58	chr13 94617108 94617848	0.283612	0.596932	0.382517	0.541954	11.0842	11.9056	8.271	5	11	8	23	488	464	147	41142	chr13	94617109	94617848	+	Intergenic	Intergenic	-1802	ENSMUST00000191800.1	ENSMUST00000191800	ENSMUST00000191800	ENSMUSG00000103438	Gm36991	predicted gene, 36991 [Source:MGI Symbol;Acc:MGI:5610219]	13	94755788	94756435	1
chr17_35617004_35617659	4.62686	2.65953	271.709	4.81276e-61	2.03799e-58	chr17 35617004 35617659	0.340335	0.434132	0.525961	0.73046	14.3322	16.2932	9.62136	6	8	11	31	631	635	171	64492	chr17	35617005	35617659	+	TTS (ENSMUST00000164502.2)	#NAME?	9278	ENSMUST00000173759.1	ENSMUST00000173759	ENSMUST00000173759	ENSMUSG00000090588	Muc21	mucin 21 [Source:MGI Symbol;Acc:MGI:3779983]	17	35928815	35937529	-1
chr2_166632560_166633096	5.08965	2.28402	270.784	7.65809e-61	3.23039e-58	chr2 166632560 166633096	0.22689	0.325599	0.143444	0.424138	13.3555	9.33971	8.49606	4	6	3	18	588	364	151	88493	chr2	166632561	166633096	+	TTS (ENSMUST00000152238.7)	#NAME?	6140	ENSMUST00000099080.8	ENSMUST00000099080	ENSMUST00000099080	ENSMUSG00000039621	Prex1	phosphatidylinositol-3,4,5-trisphosphate-dependent Rac exchange factor 1 [Source:MGI Symbol;Acc:MGI:3040696]	2	166408262	166555752	-1
chr14_122713597_122714340	4.58292	2.13584	270.674	8.09022e-61	3.3996e-58	chr14 122713597 122714340	0.113445	0.325599	0.334702	0.58908	8.67656	9.67327	9.67763	2	6	7	25	382	377	172	49578	chr14	122713598	122714340	+	promoter-TSS (ENSMUST00000147018.1)	#NAME?	-60	ENSMUST00000147018.1	ENSMUST00000147018	ENSMUST00000147018	ENSMUSG00000041650	Pcca	propionyl-Coenzyme A carboxylase, alpha polypeptide [Source:MGI Symbol;Acc:MGI:97499]	14	122771736	123128512	1
chr3_112330222_112330780	5.43379	1.89857	270.436	9.1176e-61	3.81669e-58	chr3 112330222 112330780	0.170167	0.1628	0.239073	0.164943	6.26893	8.44166	9.5651	3	3	5	7	276	329	170	95496	chr3	112330223	112330780	+	TTS (ENSMUST00000197055.1)	#NAME?	1271	ENSMUST00000197055.1	ENSMUST00000197055	ENSMUST00000197055	ENSMUSG00000105073	Gm9317	predicted gene 9317 [Source:MGI Symbol;Acc:MGI:3647781]	3	112238227	112239088	-1
chr8_120200436_120201152	5.06773	1.80656	270.295	9.78581e-61	4.08083e-58	chr8 120200436 120201152	0.0567224	0.108533	0.334702	0.282759	7.33646	8.1081	6.75183	1	2	7	12	323	316	120	141705	chr8	120200437	120201152	+	intron (ENSMUST00000127664.1, intron 1 of 15)	-intron (ENSMUST00000127664.1, intron 1 of 15)	-23328	ENSMUST00000048786.12	ENSMUST00000048786	ENSMUST00000048786	ENSMUSG00000042269	Cibar2	CBY1 interacting BAR domain containing 2 [Source:MGI Symbol;Acc:MGI:3588213]	8	120893136	120904205	-1
chr9_80202122_80202909	4.33223	2.25325	270.111	1.07343e-60	4.4594e-58	chr9 80202122 80202909	0.453779	0.542665	0.334702	0.58908	9.47153	8.92917	11.9282	8	10	7	25	417	348	212	147853	chr9	80202123	80202909	+	intron (ENSMUST00000184480.7, intron 1 of 35)	-intron (ENSMUST00000035889.14, intron 1 of 32)	-15095	ENSMUST00000127779.8	ENSMUST00000127779	ENSMUST00000127779	ENSMUSG00000033577	Myo6	myosin VI [Source:MGI Symbol;Acc:MGI:104785]	9	80072313	80219011	1
chr7_29084178_29084859	5.01051	2.4464	270.035	1.11496e-60	4.61446e-58	chr7 29084178 29084859	0.22689	0.379866	0.382517	0.400575	12.924	14.0352	7.82087	4	7	8	17	569	547	139	127462	chr7	29084179	29084859	+	promoter-TSS (ENSMUST00000158594.1)	#NAME?	-825	ENSMUST00000158594.1	ENSMUST00000158594	ENSMUST00000158594	ENSMUSG00000089219	Mir1963	microRNA 1963 [Source:MGI Symbol;Acc:MGI:3837208]	7	28783061	28783119	-1
chr3_103688953_103689511	5.03746	1.76068	269.599	1.38802e-60	5.72298e-58	chr3 103688953 103689511	0.113445	0.434132	0.191258	0.164943	7.31375	6.87649	7.31449	2	8	4	7	322	268	130	94912	chr3	103688954	103689511	+	Intergenic	Intergenic	-5566	ENSMUST00000122153.1	ENSMUST00000122153	ENSMUST00000122153	ENSMUSG00000081910	Gm15986	predicted gene 15986 [Source:MGI Symbol;Acc:MGI:3802051]	3	103602114	103602513	1
chr19_29865060_29865617	6.02303	1.52014	268.903	1.96776e-60	8.06293e-58	chr19 29865060 29865617	0.0567224	0.108533	0.0956292	0.0942529	5.97365	5.51659	7.08942	1	2	2	4	263	215	126	75305	chr19	29865061	29865617	+	Intergenic	Intergenic	9878	ENSMUST00000237701.1	ENSMUST00000237701	ENSMUST00000237701	ENSMUSG00000117883	Gm50380	predicted gene, 50380 [Source:MGI Symbol;Acc:MGI:6303279]	19	29851591	29852617	-1
chr14_55441025_55441507	5.01735	2.11673	268.901	1.97024e-60	8.06293e-58	chr14 55441025 55441507	0.113445	0.325599	0.143444	0.424138	9.97123	10.3147	7.31449	2	6	3	18	439	402	130	45938	chr14	55441026	55441507	+	Intergenic	Intergenic	-20477	ENSMUST00000074642.2	ENSMUST00000074642	ENSMUST00000074642	ENSMUSG00000060680	Gm8894	predicted gene 8894 [Source:MGI Symbol;Acc:MGI:3643084]	14	55657581	55658246	-1
chr17_56611929_56612290	3.95078	2.78619	268.327	2.62769e-60	1.07134e-57	chr17 56611929 56612290	1.07773	0.488399	1.19537	0.918965	14.9682	16.3188	11.5906	19	9	25	39	659	636	206	65604	chr17	56611930	56612290	+	Intergenic	Intergenic	-1306	ENSMUST00000080492.6	ENSMUST00000080492	ENSMUST00000080492	ENSMUSG00000057863	Rpl36	ribosomal protein L36 [Source:MGI Symbol;Acc:MGI:1860603]	17	56920416	56921243	1
chr11_56900928_56901685	4.18063	2.54156	267.916	3.22903e-60	1.31164e-57	chr11 56900928 56901685	1.13445	0.434132	0.525961	0.636207	13.4237	10.2378	13.0535	20	8	11	27	591	399	232	22641	chr11	56900929	56901685	+	Intergenic	Intergenic	-110080	ENSMUST00000125292.1	ENSMUST00000125292	ENSMUST00000125292	ENSMUSG00000020524	Gria1	glutamate receptor, ionotropic, AMPA1 (alpha 1) [Source:MGI Symbol;Acc:MGI:95808]	11	56902213	57221070	1
chr8_78860720_78861423	4.82184	2.08786	267.897	3.25961e-60	1.31918e-57	chr8 78860720 78861423	0.567224	0.542665	0.143444	0.164943	8.72198	9.13444	9.17124	10	10	3	7	384	356	163	138914	chr8	78860721	78861423	+	Intergenic	Intergenic	8796	ENSMUST00000093411.4	ENSMUST00000093411	ENSMUST00000093411	ENSMUSG00000069986	Gm8054	predicted pseudogene 8054 [Source:MGI Symbol;Acc:MGI:3643693]	8	79596015	79596497	-1
chr14_75064336_75064994	4.30748	2.03695	267.616	3.75472e-60	1.51397e-57	chr14 75064336 75064994	0.567224	0.271333	0.334702	0.494828	9.10811	8.49298	7.98967	10	5	7	21	401	331	142	47476	chr14	75064337	75064994	+	Intergenic	Intergenic	28043	ENSMUST00000228689.1	ENSMUST00000228689	ENSMUST00000228689	ENSMUSG00000034959	Rubcnl	RUN and cysteine rich domain containing beclin 1 interacting protein like [Source:MGI Symbol;Acc:MGI:2685590]	14	75253467	75289972	1
chr17_66683295_66683792	4.04252	3.14627	267.257	4.49432e-60	1.80555e-57	chr17 66683295 66683792	0.850836	1.41093	1.67351	0.73046	18.8295	15.703	21.6059	15	26	35	31	829	612	384	66150	chr17	66683296	66683792	+	intron (ENSMUST00000225074.1, intron 6 of 7)	-intron (ENSMUST00000037974.9, intron 30 of 32)	-1350	ENSMUST00000232933.1	ENSMUST00000232933	ENSMUST00000232933	ENSMUSG00000117065	Gm49941	predicted gene, 49941 [Source:MGI Symbol;Acc:MGI:6270655]	17	66988733	66989189	-1
chr9_42573100_42573794	3.25107	3.11518	266.938	5.27447e-60	2.11123e-57	chr9 42573100 42573794	1.53151	2.11639	1.48225	2.05	19.2383	17.0886	15.5855	27	39	31	87	847	666	277	144587	chr9	42573101	42573794	+	intron (ENSMUST00000114865.7, intron 13 of 20)	-intron (ENSMUST00000034515.6, intron 11 of 18)	-52616	ENSMUST00000176676.1	ENSMUST00000176676	ENSMUST00000176676	NA	NA	NA	NA	NA	NA	NA
chr7_16160525_16161107	3.46806	2.79598	265.887	8.94003e-60	3.56545e-57	chr7 16160525 16161107	1.64495	1.19386	1.14755	1.1546	13.1511	15.8313	13.0535	29	22	24	49	579	617	232	126672	chr7	16160526	16161107	+	TTS (ENSMUST00000168693.2)	#NAME?	-14274	ENSMUST00000176342.7	ENSMUST00000176342	ENSMUST00000176342	ENSMUSG00000041420	Meis3	Meis homeobox 3 [Source:MGI Symbol;Acc:MGI:108519]	7	15909015	15920429	1
chr1_93132439_93133139	3.66504	2.45922	265.837	9.16815e-60	3.64318e-57	chr1 93132439 93133139	0.567224	1.1396	0.860663	0.918965	10.8343	11.4181	11.4219	10	21	18	39	477	445	203	5091	chr1	93132440	93133139	+	Intergenic	Intergenic	-2451	ENSMUST00000027491.6	ENSMUST00000027491	ENSMUST00000027491	ENSMUSG00000026272	Agxt	alanine-glyoxylate aminotransferase [Source:MGI Symbol;Acc:MGI:1329033]	1	93062962	93073143	1
chr6_128414823_128415391	4.5595	2.05985	265.123	1.31197e-59	5.1946e-57	chr6 128414823 128415391	0.170167	0.434132	0.191258	0.541954	9.0854	9.08312	8.15846	3	8	4	23	400	354	145	124993	chr6	128414824	128415391	+	promoter-TSS (ENSMUST00000203195.2)	#NAME?	-730	ENSMUST00000203195.2	ENSMUST00000203195	ENSMUST00000203195	ENSMUSG00000001518	Itfg2	integrin alpha FG-GAP repeat containing 2 [Source:MGI Symbol;Acc:MGI:1915450]	6	128386407	128401894	-1
chr19_24671457_24672068	4.26585	2.76525	264.758	1.57551e-59	6.21562e-57	chr19 24671457 24672068	0.907559	0.868264	0.765034	0.541954	18.1708	13.3938	11.1405	16	16	16	23	800	522	198	74852	chr19	24671458	24672068	+	Intergenic	Intergenic	-2245	ENSMUST00000057243.5	ENSMUST00000057243	ENSMUST00000057243	ENSMUSG00000048572	Tmem252	transmembrane protein 252 [Source:MGI Symbol;Acc:MGI:3583948]	19	24651372	24659597	1
chr8_128517646_128518361	3.87998	2.41646	263.885	2.44236e-59	9.60091e-57	chr8 128517646 128518361	0.680669	0.705465	0.669405	0.848276	12.6514	10.597	9.62136	12	13	14	36	557	413	171	142639	chr8	128517647	128518361	+	Intergenic	Intergenic	-115932	ENSMUST00000212641.1	ENSMUST00000212641	ENSMUST00000212641	ENSMUSG00000110562	Gm9204	predicted gene 9204 [Source:MGI Symbol;Acc:MGI:3644610]	8	129360417	129361363	1
chr6_37209398_37210032	3.35872	2.90178	263.453	3.03297e-59	1.188e-56	chr6 37209398 37210032	1.47478	1.51946	1.53007	1.36667	16.4219	12.6497	16.0919	26	28	32	58	723	493	286	119384	chr6	37209399	37210032	+	intron (ENSMUST00000150300.8, intron 1 of 32)	-intron (ENSMUST00000042075.7, intron 2 of 32)	89922	ENSMUST00000042075.7	ENSMUST00000042075	ENSMUST00000042075	ENSMUSG00000038665	Dgki	diacylglycerol kinase, iota [Source:MGI Symbol;Acc:MGI:2443430]	6	36822957	37277119	-1
chr2_102884282_102884909	3.27596	2.78603	263.347	3.19814e-59	1.24824e-56	chr2 102884282 102884909	1.41806	1.35666	1.33881	1.50805	15.1726	13.2398	12.7722	25	25	28	64	668	516	227	83757	chr2	102884283	102884909	+	intron (ENSMUST00000124624.1, intron 1 of 4)	-intron (ENSMUST00000005218.14, intron 1 of 18)	-13364	ENSMUST00000083749.1	ENSMUST00000083749	ENSMUST00000083749	NA	NA	NA	NA	NA	NA	NA
chr12_35479708_35480392	5.18986	1.89894	263.275	3.3159e-59	1.28961e-56	chr12 35479708 35480392	0.113445	0.0542665	0.286888	0.306322	6.54149	8.54429	9.05871	2	1	6	13	288	333	161	30520	chr12	35479709	35480392	+	Intergenic	Intergenic	38860	ENSMUST00000083261.1	ENSMUST00000083261	ENSMUST00000083261	NA	NA	NA	NA	NA	NA	NA
chr15_39727923_39728602	3.90795	2.79527	263.264	3.33504e-59	1.29248e-56	chr15 39727923 39728602	0.737391	0.651198	0.765034	1.43736	14.1959	13.753	15.698	13	12	16	61	625	536	279	51439	chr15	39727924	39728602	+	Intergenic	Intergenic	-17667	ENSMUST00000226831.1	ENSMUST00000226831	ENSMUST00000226831	ENSMUSG00000022303	Dcstamp	dendrocyte expressed seven transmembrane protein [Source:MGI Symbol;Acc:MGI:1923016]	15	39609326	39624334	1
chr13_19056719_19057249	4.41783	2.11692	263.218	3.41287e-59	1.31798e-56	chr13 19056719 19057249	0.113445	0.379866	0.573775	0.518391	9.69866	8.21073	9.50883	2	7	12	22	427	320	169	36527	chr13	19056720	19057249	+	intron (ENSMUST00000200466.4, intron 2 of 20)	-intron (ENSMUST00000003345.9, intron 2 of 20)	912	ENSMUST00000221738.1	ENSMUST00000221738	ENSMUST00000221738	ENSMUSG00000114080	Gm47661	predicted gene, 47661 [Source:MGI Symbol;Acc:MGI:6096748]	13	19214110	19242066	-1
chr8_108519122_108519821	4.02467	2.61218	262.858	4.08881e-59	1.57348e-56	chr8 108519122 108519821	0.567224	0.705465	1.09974	0.73046	13.9234	14.0609	9.95895	10	13	23	31	613	548	177	140855	chr8	108519123	108519821	+	intron (ENSMUST00000220518.1, intron 4 of 15)	-intron (ENSMUST00000220518.1, intron 4 of 15)	17475	ENSMUST00000210837.1	ENSMUST00000210837	ENSMUST00000210837	ENSMUSG00000109868	Gm39244	predicted gene, 39244 [Source:MGI Symbol;Acc:MGI:5622129]	8	109253569	109264490	-1
chr2_169753315_169753820	4.76315	1.98822	262.629	4.58632e-59	1.75876e-56	chr2 169753315 169753820	0.170167	0.542665	0.239073	0.282759	9.19897	8.74956	6.97689	3	10	5	12	405	341	124	88865	chr2	169753316	169753820	+	intron (ENSMUST00000109159.2, intron 1 of 2)	-intron (ENSMUST00000109157.1, intron 1 of 1)	119892	ENSMUST00000109157.1	ENSMUST00000109157	ENSMUST00000109157	ENSMUSG00000047907	Tshz2	teashirt zinc finger family member 2 [Source:MGI Symbol;Acc:MGI:2153084]	2	169474933	169913736	1
chr4_123104513_123106097	3.11853	3.61692	262.102	5.97636e-59	2.28382e-56	chr4 123104513 123106097	2.55251	3.20173	2.19947	3.18103	28.0739	24.35	20.6494	45	59	46	135	1236	949	367	104479	chr4	123104514	123106097	+	exon (ENSMUST00000002457.1, exon 1 of 7)	-exon (ENSMUST00000002457.1, exon 1 of 7)	140	ENSMUST00000002457.1	ENSMUST00000002457	ENSMUST00000002457	ENSMUSG00000002384	Bmp8b	bone morphogenetic protein 8b [Source:MGI Symbol;Acc:MGI:107335]	4	122998958	123025892	1
chr6_140547748_140548670	2.60778	3.76239	261.967	6.3929e-59	2.43452e-56	chr6 140547748 140548670	4.59452	4.06999	4.39895	3.8408	24.6669	26.454	25.7132	81	75	92	163	1086	1031	457	125672	chr6	140547749	140548670	+	intron (ENSMUST00000205255.2, intron 3 of 18)	-intron (ENSMUST00000087622.5, intron 11 of 30)	4056	ENSMUST00000205026.2	ENSMUST00000205026	ENSMUST00000205026	ENSMUSG00000030231	Plekha5	pleckstrin homology domain containing, family A member 5 [Source:MGI Symbol;Acc:MGI:1923802]	6	140369780	140542836	1
chr10_94276328_94276965	4.70316	1.91548	261.897	6.62296e-59	2.5134e-56	chr10 94276328 94276965	0.397057	0.1628	0.286888	0.329885	8.72198	8.31337	6.58304	7	3	6	14	384	324	117	17118	chr10	94276329	94276965	+	Intergenic	Intergenic	22056	ENSMUST00000065826.4	ENSMUST00000065826	ENSMUST00000065826	ENSMUSG00000053420	Gm4792	predicted gene 4792 [Source:MGI Symbol;Acc:MGI:3648918]	10	94129527	94134565	-1
chr14_57351293_57352058	3.80998	2.31213	261.411	8.45156e-59	3.19629e-56	chr14 57351293 57352058	0.623947	0.651198	1.00411	0.636207	10.4709	9.69893	10.3528	11	12	21	27	461	378	184	46099	chr14	57351294	57352058	+	intron (ENSMUST00000225765.1, intron 3 of 3)	-intron (ENSMUST00000022517.8, intron 3 of 7)	-11709	ENSMUST00000223673.1	ENSMUST00000223673	ENSMUST00000223673	ENSMUSG00000114321	Gm8971	predicted gene 8971 [Source:MGI Symbol;Acc:MGI:3648536]	14	57600842	57601190	1
chr14_94735018_94735954	4.37353	2.40887	261.131	9.72616e-59	3.66569e-56	chr14 94735018 94735954	0.453779	0.434132	0.334702	0.777586	12.2426	9.18576	12.4346	8	8	7	33	539	358	221	48238	chr14	94735019	94735954	+	promoter-TSS (ENSMUST00000227716.1)	#NAME?	-21	ENSMUST00000227716.1	ENSMUST00000227716	ENSMUST00000227716	ENSMUSG00000115822	Gm33450	predicted gene, 33450 [Source:MGI Symbol;Acc:MGI:5592609]	14	94953131	94972901	-1
chr6_121336460_121336993	4.70469	2.09603	261.105	9.85675e-59	3.70219e-56	chr6 121336460 121336993	0.22689	0.434132	0.143444	0.471264	9.51696	10.0325	7.42702	4	8	3	20	419	391	132	124510	chr6	121336461	121336993	+	intron (ENSMUST00000064580.13, intron 13 of 14)	-intron (ENSMUST00000064580.13, intron 13 of 14)	-6349	ENSMUST00000166457.7	ENSMUST00000166457	ENSMUST00000166457	ENSMUSG00000030109	Slc6a12	solute carrier family 6 (neurotransmitter transporter, betaine/GABA), member 12 [Source:MGI Symbol;Acc:MGI:95628]	6	121320035	121342734	1
chr5_43102056_43102854	4.76149	2.31134	260.71	1.20181e-58	4.4986e-56	chr5 43102056 43102854	0.22689	0.0542665	0.62159	0.518391	8.81284	11.572	11.6469	4	1	13	22	388	451	207	110156	chr5	43102057	43102854	+	Intergenic	Intergenic	43200	ENSMUST00000196390.1	ENSMUST00000196390	ENSMUST00000196390	ENSMUSG00000105416	Gm42553	predicted gene 42553 [Source:MGI Symbol;Acc:MGI:5662690]	5	43216598	43218226	1
chr3_152872370_152872991	4.02161	2.34275	260.664	1.22969e-58	4.58729e-56	chr3 152872370 152872991	0.453779	0.868264	0.573775	0.65977	11.7429	10.7509	8.83365	8	16	12	28	517	419	157	97806	chr3	152872371	152872991	+	intron (ENSMUST00000044278.5, intron 2 of 4)	-intron (ENSMUST00000044278.5, intron 2 of 4)	3536	ENSMUST00000162856.1	ENSMUST00000162856	ENSMUST00000162856	ENSMUSG00000090040	Gm16232	predicted gene 16232 [Source:MGI Symbol;Acc:MGI:3802113]	3	152581688	152581854	-1
chr8_125604743_125605533	3.98081	2.87184	260.607	1.26561e-58	4.70529e-56	chr8 125604743 125605533	0.964281	0.759731	0.908478	1.13103	18.8976	15.3695	11.3093	17	14	19	48	832	599	201	142360	chr8	125604744	125605533	+	intron (ENSMUST00000213085.1, intron 2 of 3)	-intron (ENSMUST00000212260.1, intron 2 of 2)	20479	ENSMUST00000212530.1	ENSMUST00000212530	ENSMUST00000212530	ENSMUSG00000110629	4930567H12Rik	RIKEN cDNA 4930567H12 gene [Source:MGI Symbol;Acc:MGI:1923181]	8	126311371	126352344	1
chr13_62712566_62713229	5.4231	1.63532	260.42	1.3899e-58	5.14991e-56	chr13 62712566 62713229	0.22689	0.108533	0.0956292	0.164943	5.86008	6.46595	7.70834	4	2	2	7	258	252	137	39694	chr13	62712567	62713229	+	promoter-TSS (ENSMUST00000222477.1)	#NAME?	-145	ENSMUST00000222477.1	ENSMUST00000222477	ENSMUST00000222477	ENSMUSG00000074863	Platr25	pluripotency associated transcript 25 [Source:MGI Symbol;Acc:MGI:3645613]	13	62819598	62908523	-1
chrX_9180826_9181511	5.42681	1.57463	260.195	1.55574e-58	5.74497e-56	chrX 9180826 9181511	0.0567224	0.271333	0.191258	0.0942529	5.90551	6.312	6.8081	1	5	4	4	260	246	121	150977	chrX	9180827	9181511	+	Intergenic	Intergenic	-18733	ENSMUST00000069763.2	ENSMUST00000069763	ENSMUST00000069763	ENSMUSG00000047344	Lancl3	LanC lantibiotic synthetase component C-like 3 (bacterial) [Source:MGI Symbol;Acc:MGI:2443335]	X	9066141	9134324	1
chr8_54116572_54116988	4.7058	1.92309	259.888	1.81493e-58	6.6796e-56	chr8 54116572 54116988	0.623947	0.108533	0.191258	0.306322	7.45003	8.15942	8.43979	11	2	4	13	328	318	150	137705	chr8	54116573	54116988	+	intron (ENSMUST00000210831.1, intron 1 of 3)	-intron (ENSMUST00000033919.5, intron 1 of 6)	39001	ENSMUST00000210831.1	ENSMUST00000210831	ENSMUST00000210831	ENSMUSG00000031520	Vegfc	vascular endothelial growth factor C [Source:MGI Symbol;Acc:MGI:109124]	8	54530641	54640131	1
chr7_124420846_124421930	2.28287	4.41529	259.292	2.44787e-58	8.97892e-56	chr7 124420846 124421930	7.99786	8.13998	8.27193	7.51667	41.9518	38.1799	35.9535	141	150	173	319	1847	1488	639	133325	chr7	124420847	124421930	+	Intergenic	Intergenic	-71518	ENSMUST00000157156.1	ENSMUST00000157156	ENSMUST00000157156	ENSMUSG00000087781	Gm23168	predicted gene, 23168 [Source:MGI Symbol;Acc:MGI:5452945]	7	124092129	124092271	1
chr7_83794466_83795215	3.12631	2.83566	259.18	2.58931e-58	9.46609e-56	chr7 83794466 83795215	1.81512	1.51946	1.67351	1.48448	13.4691	14.2405	14.5164	32	28	35	63	593	555	258	130743	chr7	83794467	83795215	+	promoter-TSS (ENSMUST00000011298.13)	#NAME?	-22	ENSMUST00000119134.7	ENSMUST00000119134	ENSMUST00000119134	ENSMUSG00000011154	Cfap161	cilia and flagella associated protein 161 [Source:MGI Symbol;Acc:MGI:1922806]	7	83423309	83444088	-1
chr3_46771691_46772286	3.91769	2.88956	259.073	2.73223e-58	9.95538e-56	chr3 46771691 46772286	1.13445	1.3024	0.908478	0.848276	13.0375	13.753	19.9742	20	24	19	36	574	536	355	91433	chr3	46771692	46772286	+	Intergenic	Intergenic	128793	ENSMUST00000183392.1	ENSMUST00000183392	ENSMUST00000183392	ENSMUSG00000098417	Mir6379	microRNA 6379 [Source:MGI Symbol;Acc:MGI:5531112]	3	46855103	46855217	-1
chr6_52961984_52963122	3.85216	2.64842	258.841	3.06956e-58	1.11475e-55	chr6 52961984 52963122	1.36134	0.813998	0.812849	0.706896	14.3776	13.3424	10.8592	24	15	17	30	633	520	193	120490	chr6	52961985	52963122	+	intron (ENSMUST00000074541.5, intron 1 of 4)	-intron (ENSMUST00000074541.5, intron 1 of 4)	47979	ENSMUST00000158584.1	ENSMUST00000158584	ENSMUST00000158584	NA	NA	NA	NA	NA	NA	NA
chr9_75716300_75716931	3.99047	2.43613	258.695	3.30352e-58	1.19575e-55	chr9 75716300 75716931	1.07773	0.379866	0.908478	0.541954	10.8343	11.495	11.3093	19	7	19	23	477	448	201	147531	chr9	75716301	75716931	+	Intergenic	Intergenic	-21957	ENSMUST00000182463.1	ENSMUST00000182463	ENSMUST00000182463	ENSMUSG00000098232	Gm3671	predicted gene 3671 [Source:MGI Symbol;Acc:MGI:3781847]	9	75600935	75601941	-1
chr1_154500343_154501178	3.04383	3.64322	258.071	4.5177e-58	1.62986e-55	chr1 154500343 154501178	3.00629	2.06213	3.10795	3.60517	26.8019	22.3742	25.0943	53	38	65	153	1180	872	446	7861	chr1	154500344	154501178	+	intron (ENSMUST00000238369.1, intron 9 of 11)	-intron (ENSMUST00000004214.14, intron 7 of 46)	-24065	ENSMUST00000188384.1	ENSMUST00000188384	ENSMUST00000188384	ENSMUSG00000004110	Cacna1e	calcium channel, voltage-dependent, R type, alpha 1E subunit [Source:MGI Symbol;Acc:MGI:106217]	1	154266477	154760247	-1
chr8_22604250_22604960	4.1207	2.04977	257.505	6.0027e-58	2.15851e-55	chr8 22604250 22604960	0.510502	0.651198	0.382517	0.447701	8.54028	9.18576	7.82087	9	12	8	19	376	358	139	135897	chr8	22604251	22604960	+	Intergenic	Intergenic	-10792	ENSMUST00000179233.1	ENSMUST00000179233	ENSMUST00000179233	NA	NA	NA	NA	NA	NA	NA
chr9_43628823_43629266	5.55804	2.24911	257.264	6.77651e-58	2.4288e-55	chr9 43628823 43629266	0.170167	0.1628	0.334702	0.188506	11.9246	12.0082	6.47051	3	3	7	8	525	468	115	144674	chr9	43628824	43629266	+	Intergenic	Intergenic	15033	ENSMUST00000214692.1	ENSMUST00000214692	ENSMUST00000214692	ENSMUSG00000111400	Gm29961	predicted gene, 29961 [Source:MGI Symbol;Acc:MGI:5589120]	9	43553379	43556454	-1
chr16_55746237_55747480	3.4676	2.55609	257.018	7.66507e-58	2.73833e-55	chr16 55746237 55747480	0.850836	0.976797	1.29099	1.10747	11.7656	11.0075	12.941	15	18	27	47	518	429	230	59789	chr16	55746238	55747480	+	Intergenic	Intergenic	6941	ENSMUST00000232350.1	ENSMUST00000232350	ENSMUST00000232350	ENSMUSG00000116969	Gm19771	predicted gene, 19771 [Source:MGI Symbol;Acc:MGI:5011956]	16	55560281	55560515	1
chr10_122953538_122954371	3.51375	3.27398	256.839	8.38505e-58	2.98581e-55	chr10 122953538 122954371	1.30462	2.65906	1.09974	1.83793	19.9652	20.142	19.2427	23	49	23	78	879	785	342	19047	chr10	122953539	122954371	+	Intergenic	Intergenic	31769	ENSMUST00000083472.3	ENSMUST00000083472	ENSMUST00000083472	ENSMUSG00000065406	Mirlet7i	microRNA let7i [Source:MGI Symbol;Acc:MGI:2676802]	10	122821545	122821629	-1
chr10_85392910_85393525	5.33952	1.75108	256.625	9.33468e-58	3.31321e-55	chr10 85392910 85393525	0.170167	0.271333	0.0956292	0.164943	8.06329	7.51795	5.62653	3	5	2	7	355	293	100	16554	chr10	85392911	85393525	+	intron (ENSMUST00000105307.7, intron 1 of 16)	-intron (ENSMUST00000020231.9, intron 1 of 9)	6391	ENSMUST00000020231.9	ENSMUST00000020231	ENSMUST00000020231	ENSMUSG00000020042	Abtb3	ankyrin repeat and BTB domain containing 3 [Source:MGI Symbol;Acc:MGI:1921257]	10	85222678	85496156	1
chr11_58255138_58256021	4.78834	2.16896	256.251	1.12674e-57	3.98628e-55	chr11 58255138 58256021	0.510502	0.271333	0.191258	0.377011	10.4482	10.8536	7.03316	9	5	4	16	460	423	125	22742	chr11	58255139	58256021	+	Intergenic	Intergenic	-19219	ENSMUST00000108834.2	ENSMUST00000108834	ENSMUST00000108834	ENSMUSG00000069873	4930438A08Rik	RIKEN cDNA 4930438A08 gene [Source:MGI Symbol;Acc:MGI:1921238]	11	58165625	58185115	1
chr1_175946681_175947425	3.6905	2.95618	256.158	1.18033e-57	4.16247e-55	chr1 175946681 175947425	1.41806	1.24813	1.05192	1.22529	19.5109	15.9083	12.1533	25	23	22	52	859	620	216	9603	chr1	175946682	175947425	+	Intergenic	Intergenic	10345	ENSMUST00000193745.1	ENSMUST00000193745	ENSMUST00000193745	ENSMUSG00000103540	Gm37668	predicted gene, 37668 [Source:MGI Symbol;Acc:MGI:5610896]	1	175783021	175784964	-1
chr6_46419646_46420429	3.77222	2.44523	256.051	1.24569e-57	4.37887e-55	chr6 46419646 46420429	0.907559	0.651198	0.62159	0.989655	10.1756	10.9305	12.6597	16	12	13	42	448	426	225	119973	chr6	46419647	46420429	+	intron (ENSMUST00000196561.1, intron 3 of 4)	-intron (ENSMUST00000114641.7, intron 11 of 23)	6282	ENSMUST00000203051.1	ENSMUST00000203051	ENSMUST00000203051	ENSMUSG00000107442	Gm43881	predicted gene, 43881 [Source:MGI Symbol;Acc:MGI:5690273]	6	46390690	46393219	1
chr8_25198523_25198966	3.42955	2.5462	255.942	1.31568e-57	4.61013e-55	chr8 25198523 25198966	0.964281	1.1396	1.00411	1.17816	12.5833	11.9825	10.5216	17	21	21	50	554	467	187	136089	chr8	25198524	25198966	+	TTS (ENSMUST00000209633.1)	#NAME?	1798	ENSMUST00000209633.1	ENSMUST00000209633	ENSMUST00000209633	ENSMUSG00000065954	Tacc1	transforming, acidic coiled-coil containing protein 1 [Source:MGI Symbol;Acc:MGI:2443510]	8	25644568	25746604	-1
chr3_100932210_100933221	3.70894	3.38831	255.513	1.63186e-57	5.69983e-55	chr3 100932210 100933221	0.623947	1.73653	1.91258	2.14425	22.9406	20.963	21.4371	11	32	40	91	1010	817	381	94687	chr3	100932211	100933221	+	TTS (ENSMUST00000134993.2)	#NAME?	9804	ENSMUST00000134993.2	ENSMUST00000134993	ENSMUST00000134993	ENSMUSG00000033233	Trim45	tripartite motif-containing 45 [Source:MGI Symbol;Acc:MGI:1918187]	3	100829518	100844236	1
chr6_126526374_126527576	3.64413	2.44538	255.39	1.73527e-57	6.04178e-55	chr6 126526374 126527576	0.794114	0.759731	0.956292	0.966092	10.0848	10.7509	12.6597	14	14	20	41	444	419	225	124830	chr6	126526375	126527576	+	Intergenic	Intergenic	8437	ENSMUST00000060972.4	ENSMUST00000060972	ENSMUST00000060972	ENSMUSG00000045534	Kcna5	potassium voltage-gated channel, shaker-related subfamily, member 5 [Source:MGI Symbol;Acc:MGI:96662]	6	126509514	126512375	-1
chr7_43480425_43482878	3.34919	3.09268	255.342	1.77781e-57	6.17028e-55	chr7 43480425 43482878	1.81512	1.51946	1.09974	2.14425	18.1708	17.4991	15.9231	32	28	23	91	800	682	283	128149	chr7	43480426	43482878	+	intron (ENSMUST00000107974.2, intron 1 of 7)	-intron (ENSMUST00000107974.2, intron 1 of 7)	-3419	ENSMUST00000206336.1	ENSMUST00000206336	ENSMUST00000206336	ENSMUSG00000013367	Iglon5	IgLON family member 5 [Source:MGI Symbol;Acc:MGI:2686277]	7	43122328	43139499	-1
chr2_166491979_166493538	3.94111	2.77065	254.959	2.15411e-57	7.45275e-55	chr2 166491979 166493538	1.07773	0.868264	0.717219	0.989655	16.9897	14.805	10.4653	19	16	15	42	748	577	186	88479	chr2	166491980	166493538	+	Intergenic	Intergenic	8009	ENSMUST00000119751.1	ENSMUST00000119751	ENSMUST00000119751	ENSMUSG00000085682	Gm14267	predicted gene 14267 [Source:MGI Symbol;Acc:MGI:3649851]	2	166342193	166342688	-1
chr1_176511377_176511964	4.68371	1.77655	254.937	2.17902e-57	7.51521e-55	chr1 176511377 176511964	0.340335	0.325599	0.239073	0.235632	6.97304	7.95415	6.47051	6	6	5	10	307	310	115	9627	chr1	176511378	176511964	+	intron (ENSMUST00000194241.1, intron 2 of 3)	-intron (ENSMUST00000194241.1, intron 2 of 3)	15602	ENSMUST00000194241.1	ENSMUST00000194241	ENSMUST00000194241	ENSMUSG00000104021	Gm36536	predicted gene, 36536 [Source:MGI Symbol;Acc:MGI:5595695]	1	176257677	176354839	-1
chr7_58667165_58668129	3.76408	2.42122	254.847	2.2789e-57	7.83506e-55	chr7 58667165 58668129	0.964281	0.542665	0.908478	0.801149	9.5851	11.5463	11.9282	17	10	19	34	422	450	212	129126	chr7	58667166	58668129	+	intron (ENSMUST00000168747.2, intron 1 of 20)	-intron (ENSMUST00000168747.2, intron 1 of 20)	-7774	ENSMUST00000207324.1	ENSMUST00000207324	ENSMUST00000207324	ENSMUSG00000109393	Gm44936	predicted gene 44936 [Source:MGI Symbol;Acc:MGI:5753512]	7	58325169	58325903	1
chr3_153292743_153293422	4.88021	2.05279	254.564	2.62739e-57	9.00496e-55	chr3 153292743 153293422	0.170167	0.488399	0.525961	0.117816	8.5857	9.54498	8.15846	3	9	11	5	378	372	145	97844	chr3	153292744	153293422	+	intron (ENSMUST00000200397.4, intron 3 of 4)	-intron (ENSMUST00000064460.6, intron 2 of 2)	5566	ENSMUST00000197231.1	ENSMUST00000197231	ENSMUST00000197231	ENSMUSG00000105023	1700012D16Rik	RIKEN cDNA 1700012D16 gene [Source:MGI Symbol;Acc:MGI:1922739]	3	153002141	153004286	-1
chr14_48998512_48999275	4.7115	2.03434	254.52	2.68568e-57	9.17607e-55	chr14 48998512 48999275	0.623947	0.379866	0.0956292	0.282759	7.54088	8.90351	9.67763	11	7	2	12	332	347	172	45561	chr14	48998513	48999275	+	Intergenic	Intergenic	2942	ENSMUST00000157129.1	ENSMUST00000157129	ENSMUST00000157129	ENSMUSG00000087754	Gm23470	predicted gene, 23470 [Source:MGI Symbol;Acc:MGI:5453247]	14	49239174	49239293	-1
chr12_28929027_28929770	4.45147	1.93491	254.308	2.98705e-57	1.01741e-54	chr12 28929027 28929770	0.170167	0.271333	0.430332	0.471264	7.35917	7.85151	9.00244	3	5	9	20	324	306	160	30072	chr12	28929028	28929770	+	intron (ENSMUST00000221643.1, intron 1 of 2)	-intron (ENSMUST00000221643.1, intron 1 of 2)	19170	ENSMUST00000221643.1	ENSMUST00000221643	ENSMUST00000221643	ENSMUSG00000113387	Gm31508	predicted gene, 31508 [Source:MGI Symbol;Acc:MGI:5590667]	12	28960228	29091873	1
chr13_30364412_30365098	4.05614	2.21439	254.245	3.08287e-57	1.04679e-54	chr13 30364412 30365098	0.510502	0.596932	0.62159	0.565517	8.19957	11.0332	9.62136	9	11	13	24	361	430	171	37167	chr13	30364413	30365098	+	intron (ENSMUST00000221743.1, intron 1 of 1)	-intron (ENSMUST00000066412.7, intron 2 of 2)	-5604	ENSMUST00000222575.1	ENSMUST00000222575	ENSMUST00000222575	ENSMUSG00000113424	Gm48161	predicted gene, 48161 [Source:MGI Symbol;Acc:MGI:6097531]	13	30554342	30561166	1
chr7_96302745_96303350	4.98713	1.68544	254.197	3.1589e-57	1.0693e-54	chr7 96302745 96303350	0.340335	0.108533	0.143444	0.235632	6.04179	7.10742	7.31449	6	2	3	10	266	277	130	131245	chr7	96302746	96303350	+	intron (ENSMUST00000107165.7, intron 1 of 32)	-intron (ENSMUST00000107162.7, intron 1 of 32)	-2619	ENSMUST00000184738.1	ENSMUST00000184738	ENSMUST00000184738	ENSMUSG00000099030	Mir6394	microRNA 6394 [Source:MGI Symbol;Acc:MGI:5531311]	7	95954874	95954972	1
chrX_135209958_135211075	3.82869	2.2832	253.676	4.10339e-57	1.38473e-54	chrX 135209958 135211075	0.510502	0.651198	1.00411	0.636207	9.35796	10.4174	10.184	9	12	21	27	412	406	181	153459	chrX	135209959	135211075	+	intron (ENSMUST00000033783.1, intron 1 of 2)	-intron (ENSMUST00000033783.1, intron 1 of 2)	170	ENSMUST00000033783.1	ENSMUST00000033783	ENSMUST00000033783	ENSMUSG00000031409	Tceal6	transcription elongation factor A (SII)-like 6 [Source:MGI Symbol;Acc:MGI:1923939]	X	134109436	134111436	-1
chr4_49610420_49611325	3.34062	3.04736	253.373	4.7775e-57	1.60728e-54	chr4 49610420 49611325	1.30462	1.24813	1.57788	2.19138	16.0357	16.4471	17.7236	23	23	33	93	706	641	315	100565	chr4	49610421	49611325	+	Intergenic	Intergenic	-12997	ENSMUST00000042750.2	ENSMUST00000042750	ENSMUST00000042750	ENSMUSG00000039611	Pgap4	post-GPI attachment to proteins GalNAc transferase 4 [Source:MGI Symbol;Acc:MGI:1914313]	4	49584506	49597876	-1
chr6_38543757_38544536	4.32871	2.14825	253.358	4.81177e-57	1.61386e-54	chr6 38543757 38544536	0.283612	0.542665	0.430332	0.518391	8.56299	11.0845	8.04593	5	10	9	22	377	432	143	119545	chr6	38543758	38544536	+	intron (ENSMUST00000121946.1, intron 1 of 3)	-intron (ENSMUST00000121946.1, intron 1 of 3)	1927	ENSMUST00000121946.1	ENSMUST00000121946	ENSMUST00000121946	ENSMUSG00000081670	Gm15697	predicted gene 15697 [Source:MGI Symbol;Acc:MGI:3783138]	6	38519238	38523009	-1
chr17_70025414_70025990	4.31977	1.83989	252.888	6.09404e-57	2.0377e-54	chr17 70025414 70025990	0.510502	0.325599	0.382517	0.306322	7.26832	7.72322	7.20196	9	6	8	13	320	301	128	66359	chr17	70025415	70025990	+	intron (ENSMUST00000155823.6, intron 1 of 1)	-intron (ENSMUST00000060072.11, intron 1 of 14)	56281	ENSMUST00000130971.1	ENSMUST00000130971	ENSMUST00000130971	ENSMUSG00000003279	Dlgap1	DLG associated protein 1 [Source:MGI Symbol;Acc:MGI:1346065]	17	70276068	71128408	1
chr2_140207760_140208470	4.82564	1.61585	252.681	6.75946e-57	2.25333e-54	chr2 140207760 140208470	0.170167	0.271333	0.239073	0.212069	6.38249	6.72254	6.07665	3	5	5	9	281	262	108	86223	chr2	140207761	140208470	+	Intergenic	Intergenic	37085	ENSMUST00000125913.1	ENSMUST00000125913	ENSMUST00000125913	ENSMUSG00000027384	Ndufaf5	NADH:ubiquinone oxidoreductase complex assembly factor 5 [Source:MGI Symbol;Acc:MGI:1916737]	2	140012569	140045609	1
chr12_110830438_110831085	3.95309	2.46319	252.661	6.82913e-57	2.26965e-54	chr12 110830438 110831085	0.737391	0.596932	0.956292	0.65977	12.1744	12.778	9.00244	13	11	20	28	536	498	160	34985	chr12	110830439	110831085	+	intron (ENSMUST00000070565.14, intron 2 of 11)	-intron (ENSMUST00000021701.8, intron 1 of 5)	10165	ENSMUST00000177224.1	ENSMUST00000177224	ENSMUST00000177224	ENSMUSG00000056458	Mok	MOK protein kinase [Source:MGI Symbol;Acc:MGI:1336881]	12	110774232	110807373	-1
chr7_45986849_45987259	4.31052	2.15521	252.544	7.24238e-57	2.39972e-54	chr7 45986849 45987259	0.567224	0.542665	0.286888	0.471264	10.2665	9.95551	7.42702	10	10	6	20	452	388	132	128437	chr7	45986850	45987259	+	intron (ENSMUST00000002850.7, intron 22 of 30)	-intron (ENSMUST00000002850.7, intron 22 of 30)	-7048	ENSMUST00000211220.1	ENSMUST00000211220	ENSMUST00000211220	ENSMUSG00000030834	Abcc6	ATP-binding cassette, sub-family C member 6 [Source:MGI Symbol;Acc:MGI:1351634]	7	45616979	45679726	-1
chr14_72149591_72149997	4.61067	2.16059	252.511	7.36223e-57	2.43208e-54	chr14 72149591 72149997	0.397057	0.325599	0.382517	0.400575	10.8571	10.2634	6.86436	7	6	8	17	478	400	122	47236	chr14	72149592	72149997	+	Intergenic	Intergenic	18706	ENSMUST00000082551.1	ENSMUST00000082551	ENSMUST00000082551	ENSMUSG00000064485	Gm23735	predicted gene, 23735 [Source:MGI Symbol;Acc:MGI:5453512]	14	72368528	72368661	1
chr18_83123984_83124618	4.16362	2.19495	252.464	7.53781e-57	2.48261e-54	chr18 83123984 83124618	0.850836	0.379866	0.573775	0.400575	10.5618	8.90351	8.94618	15	7	12	17	465	347	159	73138	chr18	83123985	83124618	+	Intergenic	Intergenic	-16411	ENSMUST00000235874.1	ENSMUST00000235874	ENSMUST00000235874	ENSMUSG00000100430	1700095A13Rik	RIKEN cDNA 1700095A13 gene [Source:MGI Symbol;Acc:MGI:1924245]	18	83093433	83126015	-1
chr2_37786264_37787182	4.05068	2.49115	252.069	9.19364e-57	3.0189e-54	chr2 37786264 37787182	0.850836	0.488399	0.573775	0.824713	13.8325	11.8029	9.22751	15	9	12	35	609	460	164	80310	chr2	37786265	37787182	+	exon (ENSMUST00000050372.9, exon 4 of 13)	-exon (ENSMUST00000050372.9, exon 4 of 13)	-4448	ENSMUST00000147600.2	ENSMUST00000147600	ENSMUST00000147600	ENSMUSG00000035403	Crb2	crumbs family member 2 [Source:MGI Symbol;Acc:MGI:2679260]	2	37666261	37689115	1
chr9_85635648_85636295	3.26886	3.20831	252.046	9.29791e-57	3.04403e-54	chr9 85635648 85636295	2.09873	1.24813	2.53418	1.81437	18.1481	17.1142	20.5368	37	23	53	77	799	667	365	148118	chr9	85635649	85636295	+	Intergenic	Intergenic	3595	ENSMUST00000213802.1	ENSMUST00000213802	ENSMUST00000213802	ENSMUSG00000111386	Gm48842	predicted gene, 48842 [Source:MGI Symbol;Acc:MGI:6098574]	9	85519342	85521620	-1
chr13_102938390_102939214	4.40829	2.31486	251.724	1.09305e-56	3.56787e-54	chr13 102938390 102939214	0.283612	0.379866	0.908478	0.400575	12.1517	9.44234	9.73389	5	7	19	17	535	368	173	41862	chr13	102938391	102939214	+	intron (ENSMUST00000167058.7, intron 4 of 28)	-intron (ENSMUST00000099202.9, intron 2 of 27)	19544	ENSMUST00000172264.7	ENSMUST00000172264	ENSMUST00000172264	ENSMUSG00000034751	Mast4	microtubule associated serine/threonine kinase family member 4 [Source:MGI Symbol;Acc:MGI:1918885]	13	102868994	103471005	-1
chr18_31490818_31491763	3.65532	3.38012	251.562	1.18573e-56	3.85891e-54	chr18 31490818 31491763	1.13445	1.24813	1.72133	2.45057	20.8737	19.1669	25.038	20	23	36	104	919	747	445	69461	chr18	31490819	31491763	+	Intergenic	Intergenic	-24924	ENSMUST00000103981.1	ENSMUST00000103981	ENSMUST00000103981	ENSMUSG00000077169	Gm25396	predicted gene, 25396 [Source:MGI Symbol;Acc:MGI:5455173]	18	31599288	31599420	-1
chr10_41659408_41660198	3.08238	3.10298	250.99	1.58004e-56	5.12696e-54	chr10 41659408 41660198	2.60923	1.73653	2.00821	1.74368	18.1935	16.5754	15.8668	46	32	42	74	801	646	282	13401	chr10	41659409	41660198	+	intron (ENSMUST00000190522.1, intron 10 of 13)	-intron (ENSMUST00000019955.15, intron 1 of 12)	-10936	ENSMUST00000175557.1	ENSMUST00000175557	ENSMUST00000175557	ENSMUSG00000093298	Mir3473b	microRNA 3473b [Source:MGI Symbol;Acc:MGI:4950388]	10	41546735	41546789	1
chr6_29449778_29450356	4.95048	1.87392	250.881	1.66863e-56	5.39842e-54	chr6 29449778 29450356	0.567224	0.0542665	0.239073	0.188506	8.01787	8.36468	6.69557	10	1	5	8	353	326	119	118801	chr6	29449779	29450356	+	intron (ENSMUST00000101617.8, intron 24 of 46)	-intron (ENSMUST00000065090.7, intron 24 of 47)	16791	ENSMUST00000065090.7	ENSMUST00000065090	ENSMUST00000065090	ENSMUSG00000068699	Flnc	filamin C, gamma [Source:MGI Symbol;Acc:MGI:95557]	6	29433255	29461882	1
chr8_34320088_34320668	3.32861	2.74454	249.827	2.83212e-56	9.13566e-54	chr8 34320088 34320668	1.41806	1.51946	0.860663	1.48448	13.8552	13.5221	12.8285	25	28	18	63	610	527	228	136619	chr8	34320089	34320668	+	Intergenic	Intergenic	2446	ENSMUST00000182326.1	ENSMUST00000182326	ENSMUST00000182326	ENSMUSG00000098046	Gm8254	predicted gene 8254 [Source:MGI Symbol;Acc:MGI:3647610]	8	34789007	34789978	-1
chr12_26854725_26855603	3.95711	2.66663	249.188	3.90303e-56	1.25532e-53	chr12 26854725 26855603	0.510502	0.651198	0.908478	1.13103	15.1272	13.753	10.5779	9	12	19	48	666	536	188	29971	chr12	26854726	26855603	+	Intergenic	Intergenic	-20291	ENSMUST00000222026.1	ENSMUST00000222026	ENSMUST00000222026	ENSMUSG00000113218	4933409F18Rik	RIKEN cDNA 4933409F18 gene [Source:MGI Symbol;Acc:MGI:1918376]	12	26864370	26884872	-1
chr10_34221625_34222591	4.24679	2.04442	249.104	4.07072e-56	1.30543e-53	chr10 34221625 34222591	0.340335	0.488399	0.239073	0.612644	7.94972	9.26273	8.60859	6	9	5	26	350	361	153	12965	chr10	34221626	34222591	+	Intergenic	Intergenic	-8030	ENSMUST00000216782.1	ENSMUST00000216782	ENSMUST00000216782	ENSMUSG00000111876	Gm18346	predicted gene, 18346 [Source:MGI Symbol;Acc:MGI:5010531]	10	34089750	34090074	-1
chr6_24172949_24174493	3.16702	2.84886	249.083	4.11437e-56	1.31275e-53	chr6 24172949 24174493	1.58823	1.4652	1.24318	1.90862	13.9234	14.3944	14.5727	28	27	26	81	613	561	259	118526	chr6	24172950	24174493	+	Intergenic	Intergenic	-5629	ENSMUST00000031713.8	ENSMUST00000031713	ENSMUST00000031713	ENSMUSG00000029700	Slc13a1	solute carrier family 13 (sodium/sulfate symporters), member 1 [Source:MGI Symbol;Acc:MGI:1859937]	6	24088282	24168091	-1
chr3_154812924_154813212	4.26827	2.03011	249.082	4.11748e-56	1.31275e-53	chr3 154812924 154813212	0.397057	0.434132	0.573775	0.377011	7.24561	9.41669	8.88991	7	8	12	16	319	367	158	97965	chr3	154812925	154813212	+	intron (ENSMUST00000143410.6, intron 21 of 22)	-intron (ENSMUST00000064076.5, intron 23 of 24)	-26539	ENSMUST00000238360.1	ENSMUST00000238360	ENSMUST00000238360	ENSMUSG00000118443	Gm18589	predicted gene, 18589 [Source:MGI Symbol;Acc:MGI:5010774]	3	154545244	154555191	1
chr3_51590369_51591027	3.24301	2.73093	248.678	5.04204e-56	1.60286e-53	chr3 51590369 51591027	1.7584	1.41093	1.09974	1.3431	13.9461	12.624	12.941	31	26	23	57	614	492	230	91626	chr3	51590370	51591027	+	Intergenic	Intergenic	8392	ENSMUST00000193978.1	ENSMUST00000193978	ENSMUST00000193978	ENSMUSG00000104075	5430433H01Rik	RIKEN cDNA 5430433H01 gene [Source:MGI Symbol;Acc:MGI:1918620]	3	51489727	51490268	1
chr1_47563270_47564162	3.89485	2.30931	248.267	6.19908e-56	1.96498e-53	chr1 47563270 47564162	0.850836	0.651198	0.669405	0.612644	8.54028	11.2384	10.9155	15	12	14	26	376	438	194	2147	chr1	47563271	47564162	+	Intergenic	Intergenic	-42280	ENSMUST00000194762.1	ENSMUST00000194762	ENSMUST00000194762	ENSMUSG00000104067	Gm37196	predicted gene, 37196 [Source:MGI Symbol;Acc:MGI:5610424]	1	47645155	47646060	1
chr2_103343540_103344094	3.98125	2.45438	248.004	7.07229e-56	2.23531e-53	chr2 103343540 103344094	0.794114	0.705465	0.765034	0.636207	13.9915	10.4174	9.3963	14	13	16	27	616	406	167	83811	chr2	103343541	103344094	+	intron (ENSMUST00000139065.1, intron 1 of 2)	-intron (ENSMUST00000139065.1, intron 1 of 2)	20921	ENSMUST00000195179.1	ENSMUST00000195179	ENSMUST00000195179	ENSMUSG00000102686	Gm37220	predicted gene, 37220 [Source:MGI Symbol;Acc:MGI:5610448]	2	103191680	103195083	-1
chr1_95276669_95277342	4.59089	1.74971	247.82	7.75786e-56	2.44495e-53	chr1 95276669 95277342	0.22689	0.379866	0.143444	0.353448	6.51877	7.41532	7.20196	4	7	3	15	287	289	128	5189	chr1	95276670	95277342	+	Intergenic	Intergenic	-20196	ENSMUST00000190584.1	ENSMUST00000190584	ENSMUST00000190584	ENSMUSG00000099592	Gm5264	predicted gene 5264 [Source:MGI Symbol;Acc:MGI:3646340]	1	95183688	95184535	-1
chr14_22213499_22214061	3.32972	2.88212	247.543	8.91562e-56	2.80178e-53	chr14 22213499 22214061	1.30462	1.68226	1.67351	1.27241	16.7626	14.8306	12.4909	23	31	35	54	738	578	222	43990	chr14	22213500	22214061	+	intron (ENSMUST00000161249.7, intron 2 of 3)	-intron (ENSMUST00000075639.10, intron 2 of 6)	-96385	ENSMUST00000159107.1	ENSMUST00000159107	ENSMUST00000159107	ENSMUSG00000063458	Lrmda	leucine rich melanocyte differentiation associated [Source:MGI Symbol;Acc:MGI:1923883]	14	22069780	23106153	1
chr4_104640557_104641313	2.97132	3.94359	247.285	1.01463e-55	3.1794e-53	chr4 104640557 104641313	4.59452	4.39559	3.96861	2.7569	28.142	29.0968	33.6466	81	81	83	117	1239	1134	598	103079	chr4	104640558	104641313	+	intron (ENSMUST00000149672.1, intron 2 of 6)	-intron (ENSMUST00000106826.7, intron 3 of 5)	35639	ENSMUST00000149672.1	ENSMUST00000149672	ENSMUST00000149672	ENSMUSG00000028519	Dab1	disabled 1 [Source:MGI Symbol;Acc:MGI:108554]	4	103476556	104602041	1
chr12_72441384_72442707	2.67339	3.69369	247.077	1.12616e-55	3.51885e-53	chr12 72441384 72442707	3.97057	3.41879	3.63391	4.28851	24.6669	26.8902	22.2248	70	63	76	182	1086	1048	395	32216	chr12	72441385	72442707	+	promoter-TSS (ENSMUST00000160394.7)	#NAME?	11	ENSMUST00000221360.1	ENSMUST00000221360	ENSMUST00000221360	ENSMUSG00000021090	Lrrc9	leucine rich repeat containing 9 [Source:MGI Symbol;Acc:MGI:1925507]	12	72488640	72577524	1
chr14_33820566_33821206	3.81473	2.09171	247.054	1.1392e-55	3.54949e-53	chr14 33820566 33821206	0.510502	0.596932	0.717219	0.612644	9.22168	8.64693	8.1022	9	11	15	26	406	337	144	44906	chr14	33820567	33821206	+	Intergenic	Intergenic	-9603	ENSMUST00000228030.1	ENSMUST00000228030	ENSMUST00000228030	ENSMUSG00000115751	4930503F20Rik	RIKEN cDNA 4930503F20 gene [Source:MGI Symbol;Acc:MGI:1925257]	14	33530032	33533240	-1
chr17_53405965_53406717	4.87811	2.26306	246.545	1.47149e-55	4.57183e-53	chr17 53405965 53406717	0.397057	0.108533	0.286888	0.494828	8.81284	8.87786	13.6725	7	2	6	21	388	346	243	65452	chr17	53405966	53406717	+	intron (ENSMUST00000233544.1, intron 7 of 8)	-intron (ENSMUST00000024725.4, intron 10 of 12)	46414	ENSMUST00000232913.1	ENSMUST00000232913	ENSMUST00000232913	ENSMUSG00000117241	Gm9214	predicted gene 9214 [Source:MGI Symbol;Acc:MGI:3644936]	17	53666955	53668917	1
chr6_121173337_121173975	3.8968	2.41367	246.293	1.66983e-55	5.1734e-53	chr6 121173337 121173975	0.907559	0.759731	0.382517	0.848276	12.5151	9.75025	10.6904	16	14	8	36	551	380	190	124489	chr6	121173338	121173975	+	Intergenic	Intergenic	-10011	ENSMUST00000088561.9	ENSMUST00000088561	ENSMUST00000088561	ENSMUSG00000067825	Pex26	peroxisomal biogenesis factor 26 [Source:MGI Symbol;Acc:MGI:1921293]	6	121160626	121175796	1
chr16_88667174_88667812	4.26134	1.88842	246.099	1.83997e-55	5.68448e-53	chr16 88667174 88667812	0.283612	0.488399	0.478146	0.353448	8.44942	7.0561	7.42702	5	9	10	15	372	275	132	60981	chr16	88667175	88667812	+	Intergenic	Intergenic	4178	ENSMUST00000165580.2	ENSMUST00000165580	ENSMUST00000165580	ENSMUSG00000090515	Krtap27-1	keratin associated protein 27-1 [Source:MGI Symbol;Acc:MGI:3646229]	16	88467914	88468559	-1
chr5_115473182_115473541	4.78249	2.62935	245.926	2.00702e-55	6.18316e-53	chr5 115473182 115473541	0.397057	0.488399	0.430332	0.541954	15.7177	15.5747	8.04593	7	9	9	23	692	607	143	114574	chr5	115473183	115473541	+	intron (ENSMUST00000202822.1, intron 2 of 2)	-intron (ENSMUST00000031495.10, intron 3 of 3)	6576	ENSMUST00000154729.1	ENSMUST00000154729	ENSMUST00000154729	ENSMUSG00000029524	Sirt4	sirtuin 4 [Source:MGI Symbol;Acc:MGI:1922637]	5	115616069	115622784	-1
chr6_85224115_85225056	3.06579	3.23559	245.858	2.07696e-55	6.38068e-53	chr6 85224115 85225056	2.04201	2.00786	2.10384	2.56839	19.9197	20.2189	15.4167	36	37	44	109	877	788	274	121952	chr6	85224116	85225056	+	intron (ENSMUST00000045846.11, intron 13 of 13)	-intron (ENSMUST00000045846.11, intron 13 of 13)	31067	ENSMUST00000173919.1	ENSMUST00000173919	ENSMUST00000173919	ENSMUSG00000033726	Emx1	empty spiracles homeobox 1 [Source:MGI Symbol;Acc:MGI:95387]	6	85164420	85181444	1
chr1_81755546_81756332	4.61236	1.74738	245.379	2.64169e-55	8.09293e-53	chr1 81755546 81756332	0.283612	0.108533	0.239073	0.400575	6.63234	7.08176	7.48328	5	2	5	17	292	276	133	4122	chr1	81755547	81756332	+	Intergenic	Intergenic	-12970	ENSMUST00000117185.1	ENSMUST00000117185	ENSMUST00000117185	ENSMUSG00000087008	Gm5530	predicted gene 5530 [Source:MGI Symbol;Acc:MGI:3646374]	1	81719700	81720684	-1
chr4_120079118_120080213	2.58916	3.69721	245.221	2.85942e-55	8.73555e-53	chr4 120079118 120080213	4.70796	3.58159	4.01643	3.95862	25.1893	25.0171	22.9562	83	66	84	168	1109	975	408	104280	chr4	120079119	120080213	+	intron (ENSMUST00000226560.1, intron 1 of 1)	-intron (ENSMUST00000106307.8, intron 3 of 8)	14670	ENSMUST00000226560.1	ENSMUST00000226560	ENSMUST00000226560	ENSMUSG00000115115	Gm55960	predicted gene, 55960 [Source:MGI Symbol;Acc:MGI:6848380]	4	119922193	119951170	1
chr2_125727730_125728176	4.82749	1.56975	244.941	3.29132e-55	1.00271e-52	chr2 125727730 125728176	0.283612	0.217066	0.239073	0.164943	5.99636	6.49161	6.07665	5	4	5	7	264	253	108	85209	chr2	125727731	125728176	+	Intergenic	Intergenic	-3805	ENSMUST00000157002.1	ENSMUST00000157002	ENSMUST00000157002	ENSMUSG00000035109	Shc4	SHC (Src homology 2 domain containing) family, member 4 [Source:MGI Symbol;Acc:MGI:2655364]	2	125469367	125566068	-1
chr10_17571715_17572311	4.87795	1.74398	244.794	3.54358e-55	1.07657e-52	chr10 17571715 17572311	0.283612	0.0542665	0.239073	0.306322	7.22289	6.10673	8.04593	5	1	5	13	318	238	143	11958	chr10	17571716	17572311	+	intron (ENSMUST00000219966.1, intron 1 of 2)	-intron (ENSMUST00000219966.1, intron 1 of 2)	-45099	ENSMUST00000220318.1	ENSMUST00000220318	ENSMUST00000220318	ENSMUSG00000111927	Gm47770	predicted gene, 47770 [Source:MGI Symbol;Acc:MGI:6096926]	10	17398361	17402662	-1
chr4_99101562_99101986	5.28951	1.54719	244.76	3.60402e-55	1.09191e-52	chr4 99101562 99101986	0.340335	0.108533	0.0956292	0.117816	6.24621	6.64556	5.45773	6	2	2	5	275	259	97	102759	chr4	99101563	99101986	+	intron (ENSMUST00000205650.1, intron 1 of 47)	-intron (ENSMUST00000030286.13, intron 1 of 48)	2004	ENSMUST00000119478.1	ENSMUST00000119478	ENSMUST00000119478	ENSMUSG00000081733	Gm12852	predicted gene 12852 [Source:MGI Symbol;Acc:MGI:3651942]	4	98991297	98992015	-1
chr18_8603651_8604386	4.33324	1.82032	244.625	3.85742e-55	1.16546e-52	chr18 8603651 8604386	0.453779	0.1628	0.382517	0.400575	7.85887	7.03044	7.03316	8	3	8	17	346	274	125	68325	chr18	8603652	8604386	+	Intergenic	Intergenic	-75032	ENSMUST00000234206.1	ENSMUST00000234206	ENSMUST00000234206	ENSMUSG00000117424	Gm35232	predicted gene, 35232 [Source:MGI Symbol;Acc:MGI:5594391]	18	8679051	8679292	1
chr11_65341532_65342191	4.17592	2.40812	244.419	4.2786e-55	1.28916e-52	chr11 65341532 65342191	0.340335	0.542665	0.860663	0.636207	12.4924	12.0595	8.43979	6	10	18	27	550	470	150	23364	chr11	65341533	65342191	+	intron (ENSMUST00000130362.1, intron 1 of 3)	-intron (ENSMUST00000130362.1, intron 1 of 3)	23936	ENSMUST00000130362.1	ENSMUST00000130362	ENSMUST00000130362	ENSMUSG00000085162	Gm12295	predicted gene 12295 [Source:MGI Symbol;Acc:MGI:3650535]	11	65164428	65256757	-1
chr1_187689654_187690177	3.90849	2.43485	244.217	4.73465e-55	1.42266e-52	chr1 187689654 187690177	0.510502	0.922531	0.956292	0.612644	12.3107	11.8286	9.05871	9	17	20	26	542	461	161	10530	chr1	187689655	187690177	+	intron (ENSMUST00000152927.1, intron 1 of 1)	-intron (ENSMUST00000110939.7, intron 1 of 7)	-22889	ENSMUST00000238811.1	ENSMUST00000238811	ENSMUST00000238811	ENSMUSG00000118492	Gm52967	predicted gene, 52967 [Source:MGI Symbol;Acc:MGI:6388848]	1	187445002	187445232	1
chr8_125385599_125386178	3.69547	2.24891	244.209	4.75386e-55	1.42454e-52	chr8 125385599 125386178	0.623947	1.03106	0.525961	0.777586	9.53967	9.62195	9.84642	11	19	11	33	420	375	175	142340	chr8	125385600	125386178	+	Intergenic	Intergenic	106821	ENSMUST00000108775.1	ENSMUST00000108775	ENSMUST00000108775	ENSMUSG00000001995	Sipa1l2	signal-induced proliferation-associated 1 like 2 [Source:MGI Symbol;Acc:MGI:2676970]	8	126144802	126296547	-1
chr18_31752143_31752772	4.82822	1.9379	244.193	4.79094e-55	1.43173e-52	chr18 31752143 31752772	0.567224	0.434132	0.0478146	0.188506	7.76802	8.95483	7.42702	10	8	1	8	342	349	132	69478	chr18	31752144	31752772	+	Intergenic	Intergenic	-7368	ENSMUST00000234500.1	ENSMUST00000234500	ENSMUST00000234500	ENSMUSG00000041915	Ammecr1l	AMME chromosomal region gene 1-like [Source:MGI Symbol;Acc:MGI:2442711]	18	31892879	31915796	1
chr2_162895977_162896700	5.52597	2.36574	244.139	4.92277e-55	1.46713e-52	chr2 162895977 162896700	0.397057	0.271333	0.143444	0.188506	14.7183	11.4181	6.86436	7	5	3	8	648	445	122	88061	chr2	162895978	162896700	+	Intergenic	Intergenic	3184	ENSMUST00000118946.1	ENSMUST00000118946	ENSMUST00000118946	ENSMUSG00000083567	Gm11451	predicted gene 11451 [Source:MGI Symbol;Acc:MGI:3705412]	2	162740814	162741443	-1
chr17_69346121_69346514	4.64854	1.62674	244.095	5.03435e-55	1.49632e-52	chr17 69346121 69346514	0.22689	0.325599	0.239073	0.235632	6.47335	6.02976	6.86436	4	6	5	10	285	235	122	66321	chr17	69346122	69346514	+	Intergenic	Intergenic	30324	ENSMUST00000232963.1	ENSMUST00000232963	ENSMUST00000232963	ENSMUSG00000117323	Gm36487	predicted gene, 36487 [Source:MGI Symbol;Acc:MGI:5595646]	17	69622989	69651708	1
chr12_89085063_89085754	4.82396	2.2466	243.867	5.64464e-55	1.67318e-52	chr12 89085063 89085754	0.113445	0.434132	0.430332	0.400575	8.10872	9.21142	13.6162	2	8	9	17	357	359	242	33610	chr12	89085064	89085754	+	intron (ENSMUST00000057634.13, intron 2 of 19)	-intron (ENSMUST00000057634.13, intron 2 of 19)	-107697	ENSMUST00000167887.7	ENSMUST00000167887	ENSMUST00000167887	ENSMUSG00000066392	Nrxn3	neurexin III [Source:MGI Symbol;Acc:MGI:1096389]	12	88689646	90301709	1
chr7_66214370_66215106	3.48031	2.66748	243.75	5.9839e-55	1.76896e-52	chr7 66214370 66215106	1.07773	1.35666	0.860663	1.24885	13.5827	14.0352	10.6904	19	25	18	53	598	547	190	129522	chr7	66214371	66215106	+	Intergenic	Intergenic	24183	ENSMUST00000206648.1	ENSMUST00000206648	ENSMUST00000206648	ENSMUSG00000108686	Gm45080	predicted gene 45080 [Source:MGI Symbol;Acc:MGI:5753656]	7	65840303	65840585	1
chr18_82880779_82881509	4.26538	2.27352	243.7	6.13787e-55	1.8096e-52	chr18 82880779 82881509	0.567224	0.596932	0.191258	0.65977	10.9479	10.9819	8.21473	10	11	4	28	482	428	146	73098	chr18	82880780	82881509	+	Intergenic	Intergenic	-20934	ENSMUST00000236957.1	ENSMUST00000236957	ENSMUST00000236957	ENSMUSG00000117762	Gm30889	predicted gene, 30889 [Source:MGI Symbol;Acc:MGI:5590048]	18	82920203	82923801	1
chr13_57046173_57046562	4.60551	1.89495	243.442	6.98423e-55	2.05361e-52	chr13 57046173 57046562	0.453779	0.379866	0.430332	0.141379	8.33585	7.72322	7.14569	8	7	9	6	367	301	127	39321	chr13	57046174	57046562	+	Intergenic	Intergenic	-115420	ENSMUST00000104091.1	ENSMUST00000104091	ENSMUST00000104091	ENSMUSG00000077279	Gm22777	predicted gene, 22777 [Source:MGI Symbol;Acc:MGI:5452554]	13	57078633	57078761	-1
chr18_69152128_69153058	2.92657	3.20174	242.724	1.00153e-54	2.93697e-52	chr18 69152128 69153058	2.04201	2.11639	3.06014	2.19138	17.4667	18.4742	17.7236	36	39	64	93	769	720	315	72222	chr18	69152129	69153058	+	Intergenic	Intergenic	21527	ENSMUST00000157541.1	ENSMUST00000157541	ENSMUST00000157541	NA	NA	NA	NA	NA	NA	NA
chr5_35176365_35176931	4.75948	1.87536	241.812	1.58382e-54	4.63214e-52	chr5 35176365 35176931	0.113445	0.488399	0.191258	0.306322	8.7447	7.95415	6.24545	2	9	4	13	385	310	111	109676	chr5	35176366	35176931	+	Intergenic	Intergenic	-70882	ENSMUST00000030986.14	ENSMUST00000030986	ENSMUST00000030986	ENSMUSG00000029103	Lrpap1	low density lipoprotein receptor-related protein associated protein 1 [Source:MGI Symbol;Acc:MGI:96829]	5	35248845	35263110	-1
chr12_67471104_67472115	4.26843	2.03358	241.054	2.31646e-54	6.75685e-52	chr12 67471104 67472115	0.397057	0.434132	0.62159	0.353448	7.85887	7.74888	10.184	7	8	13	15	346	302	181	31832	chr12	67471105	67472115	+	Intergenic	Intergenic	17621	ENSMUST00000083299.1	ENSMUST00000083299	ENSMUST00000083299	ENSMUSG00000119139	n-R5s58	nuclear encoded rRNA 5S 58 [Source:MGI Symbol;Acc:MGI:4421903]	12	53093491	53093609	-1
chr15_38459461_38459973	4.93848	1.56268	240.822	2.60362e-54	7.57432e-52	chr15 38459461 38459973	0.22689	0.217066	0.0478146	0.259195	5.79194	6.312	6.58304	4	4	1	11	255	246	117	51369	chr15	38459462	38459973	+	Intergenic	Intergenic	-4583	ENSMUST00000228650.1	ENSMUST00000228650	ENSMUST00000228650	ENSMUSG00000115009	G930009F23Rik	RIKEN cDNA G930009F23 gene [Source:MGI Symbol;Acc:MGI:3642701]	15	38436469	38455378	-1
chr3_146708270_146709070	2.82331	3.25035	240.808	2.6215e-54	7.60615e-52	chr3 146708270 146709070	1.98528	2.93039	2.77325	2.61552	19.3519	18.0636	17.4985	35	54	58	111	852	704	311	97508	chr3	146708271	146709070	+	Intergenic	Intergenic	12451	ENSMUST00000198038.1	ENSMUST00000198038	ENSMUST00000198038	ENSMUSG00000105529	Gm9480	predicted gene 9480 [Source:MGI Symbol;Acc:MGI:3779890]	3	146401974	146402589	1
chr2_70888727_70889303	4.39222	2.27297	240.589	2.9253e-54	8.46522e-52	chr2 70888727 70889303	0.340335	0.542665	0.62159	0.424138	12.3334	10.2378	7.53955	6	10	13	18	543	399	134	82056	chr2	70888728	70889303	+	Intergenic	Intergenic	11186	ENSMUST00000150119.1	ENSMUST00000150119	ENSMUST00000150119	ENSMUSG00000085868	Gm13632	predicted gene 13632 [Source:MGI Symbol;Acc:MGI:3651357]	2	70708173	70714752	1
chr10_112743748_112744435	3.8002	2.26665	240.335	3.32338e-54	9.5919e-52	chr10 112743748 112744435	0.510502	0.868264	0.430332	0.895402	9.53967	9.87854	10.2403	9	16	9	38	420	385	182	18193	chr10	112743749	112744435	+	intron (ENSMUST00000187828.6, intron 2 of 3)	-intron (ENSMUST00000187828.6, intron 2 of 3)	17166	ENSMUST00000189116.1	ENSMUST00000189116	ENSMUST00000189116	ENSMUSG00000100314	1700010J16Rik	RIKEN cDNA 1700010J16 gene [Source:MGI Symbol;Acc:MGI:1916605]	10	112562793	112621507	1
chr1_157964357_157964912	4.8759	1.53982	240.247	3.47473e-54	1.00024e-51	chr1 157964357 157964912	0.22689	0.217066	0.239073	0.164943	5.74652	5.90146	6.69557	4	4	5	7	253	230	119	8201	chr1	157964358	157964912	+	intron (ENSMUST00000192097.1, intron 2 of 3)	-intron (ENSMUST00000192097.1, intron 2 of 3)	24250	ENSMUST00000192097.1	ENSMUST00000192097	ENSMUST00000192097	ENSMUSG00000102789	Gm38256	predicted gene, 38256 [Source:MGI Symbol;Acc:MGI:5611484]	1	157767955	157968888	1
chr2_178850246_178850792	5.79792	1.90757	240.236	3.49364e-54	1.00305e-51	chr2 178850246 178850792	0.113445	0.1628	0.0956292	0.164943	8.88098	9.80156	5.12014	2	3	2	7	391	382	91	89367	chr2	178850247	178850792	+	Intergenic	Intergenic	170614	ENSMUST00000118225.1	ENSMUST00000118225	ENSMUST00000118225	ENSMUSG00000082215	Gm14314	predicted gene 14314 [Source:MGI Symbol;Acc:MGI:3651072]	2	178661912	178662926	-1
chr8_92302636_92304049	3.11486	3.33666	240.17	3.61193e-54	1.0343e-51	chr8 92302636 92304049	3.06301	1.89933	2.43855	1.95575	21.9867	20.7578	17.0484	54	35	51	83	968	809	303	139904	chr8	92302637	92304049	+	Intergenic	Intergenic	35907	ENSMUST00000178584.1	ENSMUST00000178584	ENSMUST00000178584	ENSMUSG00000095651	Gm21817	predicted gene, 21817 [Source:MGI Symbol;Acc:MGI:5433981]	8	93063296	93065878	-1
chr11_107502453_107503325	4.11366	2.60745	240.071	3.79524e-54	1.08396e-51	chr11 107502453 107503325	0.850836	1.08533	0.430332	0.636207	15.0363	13.2141	9.62136	15	20	9	27	662	515	171	27306	chr11	107502454	107503325	+	intron (ENSMUST00000106752.9, intron 10 of 10)	-intron (ENSMUST00000106752.9, intron 10 of 10)	20973	ENSMUST00000138702.1	ENSMUST00000138702	ENSMUST00000138702	ENSMUSG00000086442	Gm11722	predicted gene 11722 [Source:MGI Symbol;Acc:MGI:3649870]	11	107372742	107373933	1
chr5_85767139_85767698	4.04462	2.2789	239.853	4.23434e-54	1.20624e-51	chr5 85767139 85767698	0.283612	0.868264	0.860663	0.471264	10.1529	9.18576	10.9155	5	16	18	20	447	358	194	112210	chr5	85767140	85767698	+	Intergenic	Intergenic	46645	ENSMUST00000197581.1	ENSMUST00000197581	ENSMUST00000197581	ENSMUSG00000104878	Gm43567	predicted gene 43567 [Source:MGI Symbol;Acc:MGI:5663704]	5	85868633	85870610	1
chr12_105378467_105379281	3.75125	2.27723	239.827	4.28962e-54	1.21882e-51	chr12 105378467 105379281	0.737391	0.651198	0.860663	0.683333	11.1978	9.80156	8.43979	13	12	18	29	493	382	150	34545	chr12	105378468	105379281	+	intron (ENSMUST00000180503.2, intron 2 of 3)	-intron (ENSMUST00000180458.8, intron 2 of 2)	24886	ENSMUST00000222380.1	ENSMUST00000222380	ENSMUST00000222380	ENSMUSG00000113314	Gm2721	predicted gene 2721 [Source:MGI Symbol;Acc:MGI:3780890]	12	105361119	105370877	-1
chr1_24326357_24327665	3.39993	2.56035	239.213	5.83827e-54	1.65455e-51	chr1 24326357 24327665	1.24789	1.03106	1.09974	1.10747	10.6526	11.1871	13.8975	22	19	23	47	469	436	247	922	chr1	24326358	24327665	+	intron (ENSMUST00000144297.1, intron 9 of 39)	-intron (ENSMUST00000051344.5, intron 20 of 47)	97494	ENSMUST00000147902.1	ENSMUST00000147902	ENSMUST00000147902	ENSMUSG00000026147	Col9a1	collagen, type IX, alpha 1 [Source:MGI Symbol;Acc:MGI:88465]	1	24216691	24291765	1
chr12_89588046_89588752	3.79208	2.28497	239.003	6.48907e-54	1.83425e-51	chr12 89588046 89588752	1.021	0.434132	0.573775	0.801149	10.5618	9.05747	10.3528	18	8	12	34	465	353	184	33633	chr12	89588047	89588752	+	intron (ENSMUST00000190626.6, intron 13 of 18)	-intron (ENSMUST00000057634.13, intron 14 of 19)	-67324	ENSMUST00000222398.1	ENSMUST00000222398	ENSMUST00000222398	ENSMUSG00000114153	Gm48692	predicted gene, 48692 [Source:MGI Symbol;Acc:MGI:6098321]	12	89622493	89624871	1
chr7_13015453_13016468	3.4919	2.93119	238.76	7.33112e-54	2.06694e-51	chr7 13015453 13016468	1.64495	0.868264	1.00411	1.81437	14.5821	16.9346	15.0791	29	16	21	77	642	660	268	126615	chr7	13015454	13016468	+	intron (ENSMUST00000209577.1, intron 1 of 6)	-intron (ENSMUST00000209577.1, intron 1 of 6)	-5927	ENSMUST00000210108.1	ENSMUST00000210108	ENSMUST00000210108	ENSMUSG00000049600	Zbtb45	zinc finger and BTB domain containing 45 [Source:MGI Symbol;Acc:MGI:2685003]	7	12737825	12743961	-1
chr6_34027357_34027770	4.18076	1.81656	238.728	7.44755e-54	2.09439e-51	chr6 34027357 34027770	0.453779	0.325599	0.286888	0.471264	6.99576	7.03044	7.87714	8	6	6	20	308	274	140	119202	chr6	34027358	34027770	+	Intergenic	Intergenic	-1884	ENSMUST00000070189.9	ENSMUST00000070189	ENSMUST00000070189	ENSMUSG00000056215	Lrguk	leucine-rich repeats and guanylate kinase domain containing [Source:MGI Symbol;Acc:MGI:1921604]	6	34006379	34110969	1
chr4_72983813_72984481	3.48384	2.95473	238.585	8.0047e-54	2.24531e-51	chr4 72983813 72984481	1.53151	1.03106	1.19537	1.74368	15.3316	13.2655	19.0739	27	19	25	74	675	517	339	101635	chr4	72983814	72984481	+	Intergenic	Intergenic	-45672	ENSMUST00000119593.1	ENSMUST00000119593	ENSMUST00000119593	ENSMUSG00000084162	Gm11251	predicted gene 11251 [Source:MGI Symbol;Acc:MGI:3651054]	4	72948056	72954311	1
chr3_52129045_52129756	3.38897	2.71988	238.461	8.51814e-54	2.38323e-51	chr3 52129045 52129756	1.36134	1.7908	0.956292	1.06034	13.4237	12.2904	14.0101	24	33	20	45	591	479	249	91712	chr3	52129046	52129756	+	Intergenic	Intergenic	-24325	ENSMUST00000121440.3	ENSMUST00000121440	ENSMUST00000121440	ENSMUSG00000061143	Maml3	mastermind like transcriptional coactivator 3 [Source:MGI Symbol;Acc:MGI:2389461]	3	51593328	52012497	-1
chr1_88584265_88585044	3.46358	3.13524	238.353	8.99111e-54	2.50916e-51	chr1 88584265 88585044	1.64495	1.3024	2.19947	1.36667	21.169	17.9097	14.1788	29	24	46	58	932	698	252	4663	chr1	88584266	88585044	+	Intergenic	Intergenic	33138	ENSMUST00000189394.1	ENSMUST00000189394	ENSMUST00000189394	ENSMUSG00000100798	Gm19589	predicted gene, 19589 [Source:MGI Symbol;Acc:MGI:5011774]	1	88479239	88489889	1
chr1_74209972_74210466	5.14502	1.57758	238.344	9.03182e-54	2.51412e-51	chr1 74209972 74210466	0.170167	0.1628	0.239073	0.141379	6.65506	6.85083	5.12014	3	3	5	6	293	267	91	3618	chr1	74209973	74210466	+	Intergenic	Intergenic	-2594	ENSMUST00000101821.1	ENSMUST00000101821	ENSMUST00000101821	ENSMUSG00000119277	Gm24517	predicted gene, 24517 [Source:MGI Symbol;Acc:MGI:5454294]	1	134208623	134208729	-1
chr9_122069314_122070198	3.07247	3.4159	238.318	9.14898e-54	2.54029e-51	chr9 122069314 122070198	3.00629	2.65906	2.72543	1.83793	23.3495	21.0657	18.5675	53	49	57	78	1028	821	330	150622	chr9	122069315	122070198	+	Intergenic	Intergenic	-18293	ENSMUST00000213810.1	ENSMUST00000213810	ENSMUST00000213810	ENSMUSG00000111389	Gm39465	predicted gene, 39465 [Source:MGI Symbol;Acc:MGI:5622350]	9	121848594	121880529	-1
chr6_147061500_147062566	3.09186	2.8869	238.166	9.87671e-54	2.73543e-51	chr6 147061500 147062566	1.58823	1.628	1.91258	1.67299	16.649	13.4707	13.3911	28	30	40	71	733	525	238	126205	chr6	147061501	147062566	+	intron (ENSMUST00000143204.1, intron 2 of 2)	-intron (ENSMUST00000036111.9, intron 7 of 7)	782	ENSMUST00000123139.1	ENSMUST00000123139	ENSMUST00000123139	ENSMUSG00000040112	Mrps35	mitochondrial ribosomal protein S35 [Source:MGI Symbol;Acc:MGI:2385255]	6	146944262	146975489	1
chr14_37143005_37143788	4.06068	1.85703	238.141	9.99932e-54	2.76241e-51	chr14 37143005 37143788	0.453779	0.379866	0.478146	0.447701	7.15475	7.0561	8.21473	8	7	10	19	315	275	146	45126	chr14	37143006	37143788	+	Intergenic	Intergenic	-8125	ENSMUST00000223921.1	ENSMUST00000223921	ENSMUST00000223921	ENSMUSG00000041028	Ghitm	growth hormone inducible transmembrane protein [Source:MGI Symbol;Acc:MGI:1913342]	14	36842049	36857229	-1
chr13_40472500_40473276	3.42198	2.37241	237.997	1.07508e-53	2.96255e-51	chr13 40472500 40473276	1.13445	0.813998	0.765034	1.08391	10.6072	10.443	10.0152	20	15	16	46	467	407	178	37787	chr13	40472501	40473276	+	Intergenic	Intergenic	-23300	ENSMUST00000226074.1	ENSMUST00000226074	ENSMUST00000226074	ENSMUSG00000114248	Gm8352	predicted gene 8352 [Source:MGI Symbol;Acc:MGI:3646048]	13	40649664	40650949	1
chr3_65577265_65578006	3.90033	2.40789	237.906	1.12563e-53	3.09407e-51	chr3 65577265 65578006	0.623947	0.271333	1.00411	0.895402	10.0848	11.1615	11.8157	11	5	21	38	444	435	210	92524	chr3	65577266	65578006	+	Intergenic	Intergenic	31596	ENSMUST00000154094.1	ENSMUST00000154094	ENSMUST00000154094	ENSMUSG00000034640	Tiparp	TCDD-inducible poly(ADP-ribose) polymerase [Source:MGI Symbol;Acc:MGI:2159210]	3	65435831	65462939	1
chr10_126337119_126337774	4.28476	2.4171	237.874	1.14346e-53	3.13522e-51	chr10 126337119 126337774	0.510502	0.813998	0.478146	0.518391	14.4685	9.08312	9.90269	9	15	10	22	637	354	176	19165	chr10	126337120	126337774	+	Intergenic	Intergenic	-34528	ENSMUST00000218075.1	ENSMUST00000218075	ENSMUST00000218075	ENSMUSG00000112482	1700025K04Rik	RIKEN cDNA 1700025K04 gene [Source:MGI Symbol;Acc:MGI:1913584]	10	126207844	126210931	1
chr10_78787486_78788209	3.70872	2.35288	237.764	1.20827e-53	3.30467e-51	chr10 78787486 78788209	0.964281	0.976797	0.382517	0.848276	10.9706	10.3917	9.79016	17	18	8	36	483	405	174	15904	chr10	78787487	78788209	+	exon (ENSMUST00000005490.9, exon 2 of 10)	-exon (ENSMUST00000005490.9, exon 2 of 10)	7146	ENSMUST00000217717.1	ENSMUST00000217717	ENSMUST00000217717	ENSMUSG00000005357	Slc1a6	solute carrier family 1 (high affinity aspartate/glutamate transporter), member 6 [Source:MGI Symbol;Acc:MGI:1096331]	10	78616330	78650599	1
chr3_153618876_153619635	4.05361	1.90746	236.926	1.84043e-53	5.02112e-51	chr3 153618876 153619635	0.737391	0.434132	0.334702	0.400575	7.88158	7.51795	7.65208	13	8	7	17	347	293	136	97873	chr3	153618877	153619635	+	intron (ENSMUST00000200397.4, intron 1 of 4)	-intron (ENSMUST00000064460.6, intron 1 of 2)	-2446	ENSMUST00000158751.1	ENSMUST00000158751	ENSMUST00000158751	NA	NA	NA	NA	NA	NA	NA
chr5_100199360_100199914	5.15589	1.50281	236.454	2.33348e-53	6.35049e-51	chr5 100199360 100199914	0.22689	0.217066	0.0956292	0.141379	5.76923	6.67122	5.28894	4	4	2	6	254	260	94	113081	chr5	100199361	100199914	+	exon (ENSMUST00000194154.1, exon 2 of 2)	-exon (ENSMUST00000194154.1, exon 2 of 2)	3026	ENSMUST00000194154.1	ENSMUST00000194154	ENSMUST00000194154	ENSMUSG00000103927	Gm9932	predicted gene 9932 [Source:MGI Symbol;Acc:MGI:3642594]	5	100344470	100348583	1
chr14_59810457_59810858	5.01952	1.52772	236.304	2.51566e-53	6.82933e-51	chr14 59810457 59810858	0.340335	0.217066	0.0478146	0.164943	5.70109	5.95278	6.58304	6	4	1	7	251	232	117	46271	chr14	59810458	59810858	+	intron (ENSMUST00000080368.12, intron 26 of 35)	-intron (ENSMUST00000080368.12, intron 26 of 35)	168110	ENSMUST00000224256.1	ENSMUST00000224256	ENSMUST00000224256	ENSMUSG00000114593	Gm19716	predicted gene, 19716 [Source:MGI Symbol;Acc:MGI:5011901]	14	59879997	59881833	1
chr7_92464123_92464991	3.6414	2.2582	236.12	2.75838e-53	7.46975e-51	chr7 92464123 92464991	0.510502	0.976797	0.812849	0.777586	10.1302	8.77522	10.2403	9	18	17	33	446	342	182	131102	chr7	92464124	92464991	+	Intergenic	Intergenic	33387	ENSMUST00000207187.1	ENSMUST00000207187	ENSMUST00000207187	ENSMUSG00000109031	Gm45201	predicted gene 45201 [Source:MGI Symbol;Acc:MGI:5753777]	7	92080378	92083056	1
chr3_39387563_39388376	4.04075	2.0891	235.961	2.98833e-53	8.07254e-51	chr3 39387563 39388376	0.567224	0.379866	0.573775	0.565517	7.54088	10.2378	8.55232	10	7	12	24	332	399	152	91233	chr3	39387564	39388376	+	Intergenic	Intergenic	-29067	ENSMUST00000056409.3	ENSMUST00000056409	ENSMUST00000056409	ENSMUSG00000050533	Gm9845	predicted pseudogene 9845 [Source:MGI Symbol;Acc:MGI:3704215]	3	39412455	39413052	-1
chr3_125134273_125135282	4.70715	1.58011	235.826	3.19749e-53	8.61633e-51	chr3 125134273 125135282	0.340335	0.217066	0.239073	0.188506	5.7238	6.56859	6.41424	6	4	5	8	252	256	114	96164	chr3	125134274	125135282	+	Intergenic	Intergenic	84775	ENSMUST00000197548.1	ENSMUST00000197548	ENSMUST00000197548	ENSMUSG00000106001	Gm42826	predicted gene 42826 [Source:MGI Symbol;Acc:MGI:5662963]	3	125010564	125013202	-1
chr1_162615418_162615872	3.24323	3.02286	235.66	3.47532e-53	9.34206e-51	chr1 162615418 162615872	1.92856	1.7908	1.6257	1.55517	18.5569	17.0886	12.6597	34	33	34	66	817	666	225	8555	chr1	162615419	162615872	+	Intergenic	Intergenic	13422	ENSMUST00000066241.6	ENSMUST00000066241	ENSMUST00000066241	ENSMUSG00000091743	Gm5705	predicted gene 5705 [Source:MGI Symbol;Acc:MGI:3643224]	1	162455926	162456636	-1
chr3_37770819_37771374	4.52755	1.6781	235.418	3.9257e-53	1.05269e-50	chr3 37770819 37771374	0.397057	0.1628	0.334702	0.259195	6.85948	7.03044	5.90785	7	3	7	11	302	274	105	91146	chr3	37770820	37771374	+	Intergenic	Intergenic	10060	ENSMUST00000196670.1	ENSMUST00000196670	ENSMUST00000196670	ENSMUSG00000106441	Gm42921	predicted gene 42921 [Source:MGI Symbol;Acc:MGI:5663058]	3	37815186	37821448	1
chr7_101501147_101501970	4.24806	2.59126	235.361	4.03834e-53	1.08026e-50	chr7 101501147 101501970	0.907559	0.325599	0.717219	0.683333	11.8792	16.3188	9.5651	16	6	15	29	523	636	170	131807	chr7	101501148	101501970	+	promoter-TSS (ENSMUST00000209315.1)	#NAME?	-58	ENSMUST00000209315.1	ENSMUST00000209315	ENSMUST00000209315	ENSMUSG00000110195	Pde2a	phosphodiesterase 2A, cGMP-stimulated [Source:MGI Symbol;Acc:MGI:2446107]	7	101070898	101162034	1
chr3_125937180_125939259	2.63136	4.07897	235.329	4.10391e-53	1.09513e-50	chr3 125937180 125939259	4.70796	5.15532	4.78146	5.91437	27.8013	37.7694	30.7771	83	95	100	251	1224	1472	547	96195	chr3	125937181	125939259	+	intron (ENSMUST00000196481.1, intron 1 of 1)	-intron (ENSMUST00000057944.11, intron 1 of 5)	331	ENSMUST00000196481.1	ENSMUST00000196481	ENSMUST00000196481	ENSMUSG00000032854	Ugt8a	UDP galactosyltransferase 8A [Source:MGI Symbol;Acc:MGI:109522]	3	125658920	125732268	-1
chr2_92640385_92641022	4.79534	1.7099	235.179	4.42446e-53	1.1778e-50	chr2 92640385 92641022	0.113445	0.379866	0.239073	0.235632	7.31375	7.46664	5.57026	2	7	5	10	322	291	99	83341	chr2	92640386	92641022	+	Intergenic	Intergenic	40997	ENSMUST00000065797.6	ENSMUST00000065797	ENSMUST00000065797	ENSMUSG00000027221	Chst1	carbohydrate sulfotransferase 1 [Source:MGI Symbol;Acc:MGI:1924219]	2	92430052	92445595	1
chr2_60196850_60197243	4.6885	1.54794	235.005	4.82948e-53	1.2825e-50	chr2 60196850 60197243	0.283612	0.271333	0.143444	0.235632	6.45063	5.74751	6.02038	5	5	3	10	284	224	107	81396	chr2	60196851	60197243	+	intron (ENSMUST00000144893.1, intron 1 of 3)	-intron (ENSMUST00000144893.1, intron 1 of 3)	12112	ENSMUST00000138089.1	ENSMUST00000138089	ENSMUST00000138089	ENSMUSG00000026987	Baz2b	bromodomain adjacent to zinc finger domain, 2B [Source:MGI Symbol;Acc:MGI:2442782]	2	59729707	60040183	-1
chr11_64738715_64739519	4.3154	2.15467	234.632	5.823e-53	1.5426e-50	chr11 64738715 64739519	0.623947	0.651198	0.0956292	0.494828	10.5845	8.95483	8.21473	11	12	2	21	466	349	146	23312	chr11	64738716	64739519	+	Intergenic	Intergenic	20910	ENSMUST00000121627.1	ENSMUST00000121627	ENSMUST00000121627	ENSMUSG00000081756	Gm12291	predicted gene 12291 [Source:MGI Symbol;Acc:MGI:3649312]	11	64650543	64650853	-1
chr18_42492405_42492886	4.16366	2.22248	234.57	6.00901e-53	1.58804e-50	chr18 42492405 42492886	0.283612	0.759731	0.765034	0.400575	10.8798	9.82722	8.15846	5	14	16	17	479	383	145	70453	chr18	42492406	42492886	+	Intergenic	Intergenic	5558	ENSMUST00000237473.1	ENSMUST00000237473	ENSMUST00000237473	ENSMUSG00000118058	Gm3631	predicted gene 3631 [Source:MGI Symbol;Acc:MGI:3781807]	18	42620153	42621422	1
chr16_42661600_42662389	2.94863	3.31504	234.215	7.17975e-53	1.89288e-50	chr16 42661600 42662389	2.72268	1.628	2.72543	2.85115	19.0566	20.6808	18.5675	48	30	57	121	839	806	330	58989	chr16	42661601	42662389	+	Intergenic	Intergenic	-1931	ENSMUST00000232064.1	ENSMUST00000232064	ENSMUST00000232064	ENSMUSG00000116679	Gm49739	predicted gene, 49739 [Source:MGI Symbol;Acc:MGI:6215227]	16	42484289	42484498	1
chr10_10474862_10475429	3.83423	2.71735	234.143	7.44654e-53	1.95851e-50	chr10 10474862 10475429	0.907559	0.542665	1.09974	1.1546	11.811	12.1365	17.386	16	10	23	49	520	473	309	11567	chr10	10474863	10475429	+	Intergenic	Intergenic	-2820	ENSMUST00000132573.1	ENSMUST00000132573	ENSMUST00000132573	ENSMUSG00000050994	Adgb	androglobin [Source:MGI Symbol;Acc:MGI:3605549]	10	10211453	10348070	-1
chr14_21505952_21506481	4.42869	2.06616	233.729	9.1669e-53	2.40521e-50	chr14 21505952 21506481	0.510502	0.325599	0.525961	0.306322	9.06269	10.2121	6.69557	9	6	11	13	399	398	119	43918	chr14	21505953	21506481	+	intron (ENSMUST00000183228.1, intron 1 of 1)	-intron (ENSMUST00000069648.13, intron 1 of 16)	5328	ENSMUST00000183055.1	ENSMUST00000183055	ENSMUST00000183055	ENSMUSG00000021767	Kat6b	K(lysine) acetyltransferase 6B [Source:MGI Symbol;Acc:MGI:1858746]	14	21531502	21722546	1
chr1_79362784_79363746	4.49391	1.74261	233.708	9.26376e-53	2.42483e-50	chr1 79362784 79363746	0.22689	0.488399	0.239073	0.282759	7.38189	7.33834	5.96412	4	9	5	12	325	286	106	3934	chr1	79362785	79363746	+	Intergenic	Intergenic	76777	ENSMUST00000185234.1	ENSMUST00000185234	ENSMUST00000185234	ENSMUSG00000050711	Scg2	secretogranin II [Source:MGI Symbol;Acc:MGI:103033]	1	79412386	79417837	-1
chr4_125850391_125851149	3.37902	2.89589	233.669	9.445e-53	2.46638e-50	chr4 125850391 125851149	1.81512	1.4652	1.33881	1.22529	16.331	16.5498	11.7032	32	27	28	52	719	645	208	104722	chr4	125850392	125851149	+	Intergenic	Intergenic	48212	ENSMUST00000123368.7	ENSMUST00000123368	ENSMUST00000123368	ENSMUSG00000085562	2610028E06Rik	RIKEN cDNA 2610028E06 gene [Source:MGI Symbol;Acc:MGI:1919645]	4	125781644	125816210	-1
chr2_93456516_93457134	2.69297	3.3281	233.194	1.19902e-52	3.12356e-50	chr2 93456516 93457134	3.34662	2.44199	2.96451	3.01609	17.8982	19.6544	19.7491	59	45	62	128	788	766	351	83429	chr2	93456517	93457134	+	TTS (ENSMUST00000162565.7)	#NAME?	4004	ENSMUST00000163052.1	ENSMUST00000163052	ENSMUST00000163052	ENSMUSG00000075025	Gm10804	predicted gene 10804 [Source:MGI Symbol;Acc:MGI:3641755]	2	93283164	93300216	1
chr2_12973714_12974248	4.64965	1.73285	233.186	1.20398e-52	3.12905e-50	chr2 12973714 12974248	0.397057	0.108533	0.0956292	0.400575	6.63234	7.26137	7.03316	7	2	2	17	292	283	125	78362	chr2	12973715	12974248	+	intron (ENSMUST00000150283.1, intron 1 of 1)	-intron (ENSMUST00000028063.6, intron 1 of 4)	-3958	ENSMUST00000195521.1	ENSMUST00000195521	ENSMUST00000195521	ENSMUSG00000026730	Pter	phosphotriesterase related [Source:MGI Symbol;Acc:MGI:107372]	2	12928852	13008266	1
chr15_24992731_24993857	3.28548	2.74301	232.628	1.59269e-52	4.1295e-50	chr15 24992731 24993857	1.13445	1.41093	1.05192	1.72011	12.4924	13.0345	14.7978	20	26	22	73	550	508	263	50433	chr15	24992732	24993857	+	intron (ENSMUST00000180955.1, intron 1 of 3)	-intron (ENSMUST00000180955.1, intron 1 of 3)	25100	ENSMUST00000226189.1	ENSMUST00000226189	ENSMUST00000226189	ENSMUSG00000097452	Gm2824	predicted gene 2824 [Source:MGI Symbol;Acc:MGI:3780995]	15	24981706	25027444	-1
chr7_34334916_34335824	-4.4288	2.65344	232.548	1.65863e-52	4.29034e-50	chr7 34334916 34335824	8.62181	10.7448	10.3758	12.7948	0.272562	0.718439	0.506387	152	198	217	543	12	28	9	127761	chr7	34334917	34335824	+	Intergenic	Intergenic	18125	ENSMUST00000206830.1	ENSMUST00000206830	ENSMUST00000206830	ENSMUSG00000066568	Lsm14a	LSM14A mRNA processing body assembly factor [Source:MGI Symbol;Acc:MGI:1914320]	7	34044071	34092740	-1
chr8_22496368_22497127	4.62322	2.87682	232.484	1.71246e-52	4.41915e-50	chr8 22496368 22497127	0.340335	0.379866	0.478146	1.10747	11.97	19.1156	16.5983	6	7	10	47	527	745	295	135883	chr8	22496369	22497127	+	intron (ENSMUST00000209305.1, intron 1 of 1)	-intron (ENSMUST00000067786.8, intron 1 of 10)	-9377	ENSMUST00000209347.1	ENSMUST00000209347	ENSMUST00000209347	ENSMUSG00000037656	Slc20a2	solute carrier family 20, member 2 [Source:MGI Symbol;Acc:MGI:97851]	8	22966804	23059628	1
chr12_109009955_109010613	2.76752	3.82847	232.156	2.01901e-52	5.19801e-50	chr12 109009955 109010613	4.08401	4.44986	4.54239	3.15747	30.6632	27.1981	23.8565	72	82	95	134	1350	1060	424	34846	chr12	109009956	109010613	+	intron (ENSMUST00000167816.7, intron 4 of 6)	-intron (ENSMUST00000047115.8, intron 5 of 7)	-10518	ENSMUST00000221510.1	ENSMUST00000221510	ENSMUST00000221510	ENSMUSG00000040877	Wdr25	WD repeat domain 25 [Source:MGI Symbol;Acc:MGI:3045255]	12	108859557	108994378	1
chr10_72619369_72619998	4.30466	2.2537	231.965	2.22241e-52	5.70827e-50	chr10 72619369 72619998	0.283612	0.542665	0.956292	0.306322	10.8116	9.72459	9.28377	5	10	20	13	476	379	165	15366	chr10	72619370	72619998	+	Intergenic	Intergenic	-35161	ENSMUST00000020081.10	ENSMUST00000020081	ENSMUST00000020081	ENSMUSG00000019923	Zwint	ZW10 interactor [Source:MGI Symbol;Acc:MGI:1289227]	10	72490677	72510796	1
chr13_36716603_36717189	4.65736	1.74086	231.456	2.86991e-52	7.35415e-50	chr13 36716603 36717189	0.567224	0.108533	0.191258	0.259195	6.26893	7.26137	7.53955	10	2	4	11	276	283	134	37585	chr13	36716604	36717189	+	intron (ENSMUST00000224916.1, intron 6 of 7)	-intron (ENSMUST00000224916.1, intron 6 of 7)	-5030	ENSMUST00000225048.1	ENSMUST00000225048	ENSMUST00000225048	ENSMUSG00000021420	Fars2	phenylalanine-tRNA synthetase 2, mitochondrial [Source:MGI Symbol;Acc:MGI:1917205]	13	36301395	36910254	1
chr1_55881641_55882317	4.96205	1.57751	231.207	3.25189e-52	8.31354e-50	chr1 55881641 55882317	0.22689	0.325599	0.239073	0.0942529	5.95094	5.90146	7.03316	4	6	5	4	262	230	125	2583	chr1	55881642	55882317	+	Intergenic	Intergenic	-49262	ENSMUST00000189293.1	ENSMUST00000189293	ENSMUST00000189293	ENSMUSG00000099950	9130227L01Rik	RIKEN cDNA 9130227L01 gene [Source:MGI Symbol;Acc:MGI:2445084]	1	55970400	56011487	1
chr16_37689261_37689754	4.36297	1.97872	231.112	3.41132e-52	8.70085e-50	chr16 37689261 37689754	0.283612	0.271333	0.286888	0.58908	9.40339	8.05678	7.08942	5	5	6	25	414	314	126	58724	chr16	37689262	37689754	+	Intergenic	Intergenic	7832	ENSMUST00000231714.1	ENSMUST00000231714	ENSMUST00000231714	ENSMUSG00000116529	Gm4600	predicted gene 4600 [Source:MGI Symbol;Acc:MGI:3782783]	16	37517132	37517702	-1
chr10_96359188_96359769	4.36199	2.02466	230.974	3.65499e-52	9.30073e-50	chr10 96359188 96359769	0.453779	0.217066	0.334702	0.541954	9.51696	6.85083	9.28377	8	4	7	23	419	267	165	17369	chr10	96359189	96359769	+	intron (ENSMUST00000218518.1, intron 2 of 2)	-intron (ENSMUST00000218518.1, intron 2 of 2)	-13655	ENSMUST00000218388.1	ENSMUST00000218388	ENSMUST00000218388	ENSMUSG00000112749	Gm48428	predicted gene, 48428 [Source:MGI Symbol;Acc:MGI:6097928]	10	96171952	96181686	-1
chr2_180522738_180523370	4.55789	1.89364	230.904	3.78632e-52	9.61261e-50	chr2 180522738 180523370	0.510502	0.271333	0.239073	0.306322	8.97183	8.03112	6.02038	9	5	5	13	395	313	107	89515	chr2	180522739	180523370	+	intron (ENSMUST00000170448.1, intron 1 of 4)	-intron (ENSMUST00000029084.8, intron 1 of 3)	22827	ENSMUST00000170448.1	ENSMUST00000170448	ENSMUST00000170448	ENSMUSG00000027568	Ntsr1	neurotensin receptor 1 [Source:MGI Symbol;Acc:MGI:97386]	2	180141769	180186773	1
chr3_69163482_69164127	4.34957	1.96814	230.891	3.81156e-52	9.65433e-50	chr3 69163482 69164127	0.170167	0.325599	0.430332	0.541954	7.08661	8.03112	9.67763	3	6	9	23	312	313	172	92738	chr3	69163483	69164127	+	Intergenic	Intergenic	32572	ENSMUST00000195406.1	ENSMUST00000195406	ENSMUST00000195406	ENSMUSG00000094763	Gm1647	predicted gene 1647 [Source:MGI Symbol;Acc:MGI:2686493]	3	69038566	69064510	1
chr3_155962289_155963364	3.93053	2.12295	230.823	3.94298e-52	9.9642e-50	chr3 155962289 155963364	0.453779	0.759731	0.382517	0.683333	7.7453	9.468	9.79016	8	14	8	29	341	369	174	97997	chr3	155962290	155963364	+	Intergenic	Intergenic	-13527	ENSMUST00000196033.1	ENSMUST00000196033	ENSMUST00000196033	ENSMUSG00000104553	9330178D15Rik	RIKEN cDNA 9330178D15 gene [Source:MGI Symbol;Acc:MGI:4437729]	3	155681991	155714229	1
chr13_41847506_41848195	5.51727	1.67308	230.818	3.95411e-52	9.96936e-50	chr13 41847506 41848195	0.283612	0.1628	0.0478146	0.117816	7.33646	7.77454	4.89508	5	3	1	5	323	303	87	37912	chr13	41847507	41848195	+	promoter-TSS (ENSMUST00000072012.9)	#NAME?	-167	ENSMUST00000121404.7	ENSMUST00000121404	ENSMUST00000121404	ENSMUSG00000058022	Adtrp	androgen dependent TFPI regulating protein [Source:MGI Symbol;Acc:MGI:1924596]	13	41916624	42001160	-1
chr12_21456104_21456855	3.1471	2.82154	230.69	4.21566e-52	1.06044e-49	chr12 21456104 21456855	1.58823	0.976797	1.72133	1.86149	13.6735	14.0865	14.2351	28	18	36	79	602	549	253	29724	chr12	21456105	21456855	+	Intergenic	Intergenic	35721	ENSMUST00000227598.1	ENSMUST00000227598	ENSMUST00000227598	ENSMUSG00000097055	Gm4419	predicted gene 4419 [Source:MGI Symbol;Acc:MGI:3782604]	12	21467324	21471065	1
chr6_62601760_62602642	3.60861	2.32794	230.618	4.37171e-52	1.09718e-49	chr6 62601760 62602642	1.24789	0.542665	0.765034	0.801149	9.78952	9.7759	11.028	22	10	16	34	431	381	196	121061	chr6	62601761	62602642	+	Intergenic	Intergenic	20131	ENSMUST00000205036.1	ENSMUST00000205036	ENSMUST00000205036	ENSMUSG00000108160	Gm19237	predicted gene, 19237 [Source:MGI Symbol;Acc:MGI:5011422]	6	62559054	62560185	1
chr10_69008558_69009195	4.3695	1.71997	230.599	4.41195e-52	1.10475e-49	chr10 69008558 69009195	0.283612	0.1628	0.382517	0.400575	7.42731	6.28634	6.75183	5	3	8	17	327	245	120	15040	chr10	69008559	69009195	+	Intergenic	Intergenic	25011	ENSMUST00000219854.1	ENSMUST00000219854	ENSMUST00000219854	ENSMUSG00000112331	Gm33035	predicted gene, 33035 [Source:MGI Symbol;Acc:MGI:5592194]	10	68856570	68869718	-1
chrX_135086572_135087735	4.3969	2.07722	230.563	4.49229e-52	1.1223e-49	chrX 135086572 135087735	0.397057	0.434132	0.0956292	0.612644	8.54028	10.0325	7.87714	7	8	2	26	376	391	140	153455	chrX	135086573	135087735	+	Intergenic	Intergenic	-26818	ENSMUST00000142907.7	ENSMUST00000142907	ENSMUST00000142907	ENSMUSG00000089759	3632454L22Rik	RIKEN cDNA 3632454L22 gene [Source:MGI Symbol;Acc:MGI:2444359]	X	133923483	133961085	-1
chr2_77289614_77290210	5.02579	1.75041	230.405	4.86453e-52	1.21254e-49	chr2 77289614 77290210	0.0567224	0.217066	0.239073	0.282759	5.95094	6.7482	9.05871	1	4	5	12	262	263	161	82625	chr2	77289615	77290210	+	Intergenic	Intergenic	-1419	ENSMUST00000119086.1	ENSMUST00000119086	ENSMUST00000119086	ENSMUSG00000081611	Gm13651	predicted gene 13651 [Source:MGI Symbol;Acc:MGI:3649524]	2	77121675	77122784	1
chr2_152403569_152403815	5.16044	1.69152	230.346	5.0098e-52	1.24592e-49	chr2 152403569 152403815	0.170167	0.379866	0.143444	0.117816	7.22289	7.6719	5.28894	3	7	3	5	318	299	94	87032	chr2	152403570	152403815	+	Intergenic	Intergenic	-5629	ENSMUST00000182625.1	ENSMUST00000182625	ENSMUST00000182625	ENSMUSG00000051817	Sox12	SRY (sex determining region Y)-box 12 [Source:MGI Symbol;Acc:MGI:98360]	2	152235531	152239983	-1
chr9_31118492_31119283	3.14575	3.13442	230.284	5.16847e-52	1.28247e-49	chr9 31118492 31119283	1.81512	1.73653	2.6298	1.72011	20.215	15.4208	16.4857	32	32	55	73	890	601	293	143828	chr9	31118493	31119283	+	intron (ENSMUST00000148789.7, intron 1 of 8)	-intron (ENSMUST00000034478.2, intron 1 of 18)	12839	ENSMUST00000214418.1	ENSMUST00000214418	ENSMUST00000214418	ENSMUSG00000031995	St14	suppression of tumorigenicity 14 (colon carcinoma) [Source:MGI Symbol;Acc:MGI:1338881]	9	31000698	31043149	-1
chr13_92150420_92151791	3.92225	1.95232	230.223	5.3304e-52	1.31966e-49	chr13 92150420 92151791	0.567224	0.759731	0.286888	0.494828	8.01787	7.87717	7.76461	10	14	6	21	353	307	138	40949	chr13	92150421	92151791	+	Intergenic	Intergenic	-19450	ENSMUST00000216219.1	ENSMUST00000216219	ENSMUST00000216219	ENSMUSG00000021708	Rasgrf2	RAS protein-specific guanine nucleotide-releasing factor 2 [Source:MGI Symbol;Acc:MGI:109137]	13	92028519	92268164	-1
chr1_121345965_121346522	4.92761	1.93262	230.135	5.5696e-52	1.37578e-49	chr1 121345965 121346522	0.567224	0.1628	0.334702	0.117816	7.60902	7.0561	9.84642	10	3	7	5	335	275	175	5938	chr1	121345966	121346522	+	Intergenic	Intergenic	-13655	ENSMUST00000071064.12	ENSMUST00000071064	ENSMUST00000071064	ENSMUSG00000003721	Insig2	insulin induced gene 2 [Source:MGI Symbol;Acc:MGI:1920249]	1	121232082	121260318	-1
chr3_54567174_54567894	3.9024	2.67724	229.849	6.43152e-52	1.58512e-49	chr3 54567174 54567894	1.021	0.434132	1.33881	0.777586	13.6735	10.8536	15.5292	18	8	28	33	602	423	276	91924	chr3	54567175	54567894	+	Intergenic	Intergenic	67034	ENSMUST00000197444.1	ENSMUST00000197444	ENSMUST00000197444	ENSMUSG00000104831	B020017C02Rik	RIKEN cDNA B020017C02 gene [Source:MGI Symbol;Acc:MGI:3588285]	3	54540302	54541989	-1
chr18_7739959_7740785	4.59644	1.67133	229.74	6.79211e-52	1.67023e-49	chr18 7739959 7740785	0.397057	0.1628	0.239073	0.282759	5.76923	6.82517	7.48328	7	3	5	12	254	266	133	68301	chr18	7739960	7740785	+	Intergenic	Intergenic	-47646	ENSMUST00000234387.1	ENSMUST00000234387	ENSMUST00000234387	ENSMUSG00000117542	Gm18763	predicted gene, 18763 [Source:MGI Symbol;Acc:MGI:5010948]	18	7684530	7692726	-1
chr1_52353999_52354866	2.38142	4.38845	229.65	7.10529e-52	1.74334e-49	chr1 52353999 52354866	6.35291	6.83758	7.02875	9.0954	39.5442	36.1272	40.3422	112	126	147	386	1741	1408	717	2321	chr1	52354000	52354866	+	Intergenic	Intergenic	-65338	ENSMUST00000185256.1	ENSMUST00000185256	ENSMUST00000185256	ENSMUSG00000099648	Gm5975	predicted gene 5975 [Source:MGI Symbol;Acc:MGI:3646539]	1	52326856	52328254	-1
chr5_113664484_113665137	5.57963	1.99076	229.604	7.27221e-52	1.78031e-49	chr5 113664484 113665137	0.113445	0.217066	0.239073	0.141379	11.7202	7.54361	5.96412	2	4	5	6	516	294	106	114329	chr5	113664485	113665137	+	Intergenic	Intergenic	-14385	ENSMUST00000047936.12	ENSMUST00000047936	ENSMUST00000047936	ENSMUSG00000042190	Cmklr1	chemerin chemokine-like receptor 1 [Source:MGI Symbol;Acc:MGI:109603]	5	113750415	113788487	-1
chr11_44395333_44395867	4.94892	1.49137	229.193	8.94096e-52	2.18396e-49	chr11 44395333 44395867	0.170167	0.108533	0.143444	0.259195	5.63295	5.51659	6.69557	3	2	3	11	248	215	119	21750	chr11	44395334	44395867	+	Intergenic	Intergenic	-4463	ENSMUST00000102796.9	ENSMUST00000102796	ENSMUST00000102796	ENSMUSG00000004296	Il12b	interleukin 12b [Source:MGI Symbol;Acc:MGI:96540]	11	44290890	44304860	1
chr8_10139472_10140163	3.91522	2.05448	228.702	1.14371e-51	2.78748e-49	chr8 10139472 10140163	0.623947	0.705465	0.286888	0.612644	9.19897	7.62059	8.72112	11	13	6	26	405	297	155	135253	chr8	10139473	10140163	+	Intergenic	Intergenic	-14093	ENSMUST00000208309.1	ENSMUST00000208309	ENSMUST00000208309	ENSMUSG00000039057	Myo16	myosin XVI [Source:MGI Symbol;Acc:MGI:2685951]	8	10203911	10684742	1
chr15_87596889_87597625	4.67148	2.27072	228.686	1.15345e-51	2.80497e-49	chr15 87596889 87597625	0.453779	0.379866	0.382517	0.377011	12.5606	11.0845	6.58304	8	7	8	16	553	432	117	54632	chr15	87596890	87597625	+	intron (ENSMUST00000230414.1, intron 1 of 3)	-intron (ENSMUST00000230414.1, intron 1 of 3)	-27973	ENSMUST00000068088.7	ENSMUST00000068088	ENSMUST00000068088	ENSMUSG00000054863	Tafa5	TAFA chemokine like family member 5 [Source:MGI Symbol;Acc:MGI:2146182]	15	87428500	87643565	1
chr14_75461934_75462406	4.49505	1.61702	228.583	1.21435e-51	2.94655e-49	chr14 75461934 75462406	0.22689	0.1628	0.334702	0.329885	5.97365	6.95347	6.13291	4	3	7	14	263	271	109	47513	chr14	75461935	75462406	+	intron (ENSMUST00000164848.2, intron 1 of 1)	-intron (ENSMUST00000164848.2, intron 1 of 1)	6188	ENSMUST00000164848.2	ENSMUST00000164848	ENSMUST00000164848	ENSMUSG00000091722	Siah3	siah E3 ubiquitin protein ligase family member 3 [Source:MGI Symbol;Acc:MGI:2685758]	14	75693422	75767148	1
chr6_87748307_87749122	4.91948	1.76336	228.519	1.25422e-51	3.02989e-49	chr6 87748307 87749122	0.113445	0.271333	0.286888	0.235632	8.49485	7.26137	5.40147	2	5	6	10	374	283	96	122201	chr6	87748308	87749122	+	intron (ENSMUST00000159956.1, intron 1 of 2)	-intron (ENSMUST00000032132.8, intron 2 of 7)	-4807	ENSMUST00000159681.1	ENSMUST00000159681	ENSMUST00000159681	ENSMUSG00000068263	Efcc1	EF hand and coiled-coil domain containing 1 [Source:MGI Symbol;Acc:MGI:3611451]	6	87707851	87732890	1
chr17_11988096_11988838	3.04712	2.7037	228.52	1.25337e-51	3.02989e-49	chr17 11988096 11988838	1.53151	1.51946	1.53007	1.55517	12.4016	11.649	14.2914	27	28	32	66	546	454	254	62574	chr17	11988097	11988838	+	intron (ENSMUST00000233706.1, intron 8 of 10)	-intron (ENSMUST00000191124.6, intron 9 of 11)	-41449	ENSMUST00000190894.1	ENSMUST00000190894	ENSMUST00000190894	ENSMUSG00000023826	Prkn	parkin RBR E3 ubiquitin protein ligase [Source:MGI Symbol;Acc:MGI:1355296]	17	11059271	12282248	1
chr12_4847994_4848412	4.44109	1.65343	228.306	1.39599e-51	3.36495e-49	chr12 4847994 4848412	0.283612	0.108533	0.334702	0.377011	6.45063	6.92781	6.13291	5	2	7	16	284	270	109	28947	chr12	4847995	4848412	+	intron (ENSMUST00000223551.1, intron 1 of 3)	-intron (ENSMUST00000053034.5, intron 1 of 1)	-1943	ENSMUST00000085793.2	ENSMUST00000085793	ENSMUST00000085793	ENSMUSG00000051721	Wdcp	WD repeat and coiled coil containing [Source:MGI Symbol;Acc:MGI:3040699]	12	4893303	4910043	1
chr4_144904076_144905607	3.55818	2.32408	228.132	1.52308e-51	3.65523e-49	chr4 144904076 144905607	0.964281	0.922531	0.812849	0.777586	9.56238	9.08312	11.872	17	17	17	33	421	354	211	106752	chr4	144904077	144905607	+	intron (ENSMUST00000171001.7, intron 2 of 6)	-intron (ENSMUST00000084184.6, intron 1 of 5)	11623	ENSMUST00000084184.6	ENSMUST00000084184	ENSMUST00000084184	ENSMUSG00000066026	Dhrs3	dehydrogenase/reductase 3 [Source:MGI Symbol;Acc:MGI:1315215]	4	144619397	144654779	1
chr6_85134856_85135149	4.01645	1.83172	228.134	1.52151e-51	3.65523e-49	chr6 85134856 85135149	0.453779	0.596932	0.334702	0.424138	7.83616	6.79951	7.14569	8	11	7	18	345	265	127	121942	chr6	85134857	85135149	+	intron (ENSMUST00000204757.2, intron 2 of 3)	-intron (ENSMUST00000045986.7, intron 2 of 2)	2753	ENSMUST00000174769.1	ENSMUST00000174769	ENSMUST00000174769	ENSMUSG00000033735	Spr	sepiapterin reductase [Source:MGI Symbol;Acc:MGI:103078]	6	85107158	85114748	-1
chr8_40662242_40663093	3.25908	2.59813	227.954	1.66557e-51	3.98846e-49	chr8 40662242 40663093	1.24789	0.922531	1.09974	1.57874	12.606	11.9569	11.5344	22	17	23	67	555	466	205	137014	chr8	40662243	40663093	+	Intergenic	Intergenic	-12409	ENSMUST00000051614.4	ENSMUST00000051614	ENSMUST00000051614	ENSMUSG00000046723	Adam24	ADAM metallopeptidase domain 24 [Source:MGI Symbol;Acc:MGI:105984]	8	41128118	41135238	1
chr17_85963037_85963647	4.5803	1.83773	227.93	1.68536e-51	4.02706e-49	chr17 85963037 85963647	0.397057	0.542665	0.0956292	0.259195	7.83616	8.1081	6.24545	7	10	2	11	345	316	111	67536	chr17	85963038	85963647	+	Intergenic	Intergenic	-34763	ENSMUST00000234707.1	ENSMUST00000234707	ENSMUST00000234707	ENSMUSG00000117501	Gm30117	predicted gene, 30117 [Source:MGI Symbol;Acc:MGI:5589276]	17	86169544	86236035	-1
chr13_30627922_30628898	3.6273	2.18004	227.876	1.7322e-51	4.12998e-49	chr13 30627922 30628898	0.623947	0.651198	0.669405	0.895402	9.97123	9.23708	8.15846	11	12	14	38	439	360	145	37181	chr13	30627923	30628898	+	Intergenic	Intergenic	13367	ENSMUST00000151471.1	ENSMUST00000151471	ENSMUST00000151471	ENSMUSG00000086263	4930519D14Rik	RIKEN cDNA 4930519D14 gene [Source:MGI Symbol;Acc:MGI:1922340]	13	30799026	30808242	1
chr18_49816413_49817140	3.50099	2.54442	227.828	1.77443e-51	4.22148e-49	chr18 49816413 49817140	0.794114	0.813998	0.860663	1.46092	12.1517	11.4181	11.9282	14	15	18	62	535	445	212	70866	chr18	49816414	49817140	+	intron (ENSMUST00000186872.1, intron 1 of 4)	-intron (ENSMUST00000186872.1, intron 1 of 4)	1181	ENSMUST00000186872.1	ENSMUST00000186872	ENSMUST00000186872	ENSMUSG00000100134	1700065O20Rik	RIKEN cDNA 1700065O20 gene [Source:MGI Symbol;Acc:MGI:1923859]	18	49936393	49951025	-1
chr6_125180159_125180902	4.3562	1.81478	227.736	1.85831e-51	4.41147e-49	chr6 125180159 125180902	0.22689	0.325599	0.478146	0.353448	7.08661	8.44166	6.18918	4	6	10	15	312	329	110	124744	chr6	125180160	125180902	+	intron (ENSMUST00000043848.10, intron 10 of 31)	-intron (ENSMUST00000043848.10, intron 10 of 31)	-1119	ENSMUST00000188306.1	ENSMUST00000188306	ENSMUST00000188306	ENSMUSG00000038252	Ncapd2	non-SMC condensin I complex, subunit D2 [Source:MGI Symbol;Acc:MGI:1915548]	6	125144970	125168664	-1
chr4_70301092_70301682	4.41031	1.93007	227.731	1.86326e-51	4.41368e-49	chr4 70301092 70301682	0.510502	0.108533	0.286888	0.494828	6.81405	8.18508	9.11497	9	2	6	21	300	319	162	101548	chr4	70301093	70301682	+	intron (ENSMUST00000144099.7, intron 16 of 36)	-intron (ENSMUST00000076541.12, intron 13 of 33)	-36707	ENSMUST00000138561.7	ENSMUST00000138561	ENSMUST00000138561	ENSMUSG00000039298	Cdk5rap2	CDK5 regulatory subunit associated protein 2 [Source:MGI Symbol;Acc:MGI:2384875]	4	70135093	70328680	-1
chr4_123092577_123093726	3.16663	2.53078	227.686	1.90558e-51	4.50419e-49	chr4 123092577 123093726	1.07773	1.51946	1.24318	1.22529	11.8792	10.443	11.8157	19	28	26	52	523	407	210	104478	chr4	123092578	123093726	+	intron (ENSMUST00000127060.1, intron 3 of 3)	-intron (ENSMUST00000127060.1, intron 3 of 3)	876	ENSMUST00000127060.1	ENSMUST00000127060	ENSMUST00000127060	ENSMUSG00000086153	Gm12923	predicted gene 12923 [Source:MGI Symbol;Acc:MGI:3651539]	4	122986558	122987821	-1
chr11_53755082_53755961	2.88064	3.57613	227.415	2.18276e-51	5.14825e-49	chr11 53755082 53755961	2.55251	2.87613	3.29921	3.67586	25.8025	24.6835	18.9051	45	53	69	156	1136	962	336	22401	chr11	53755083	53755961	+	Intergenic	Intergenic	8132	ENSMUST00000184599.1	ENSMUST00000184599	ENSMUST00000184599	ENSMUSG00000099153	Mir7671	microRNA 7671 [Source:MGI Symbol;Acc:MGI:5531184]	11	53654424	53654481	-1
chr2_5001373_5002183	3.991	2.18401	227.348	2.25749e-51	5.31309e-49	chr2 5001373 5002183	0.510502	0.325599	0.765034	0.65977	10.5391	9.80156	7.53955	9	6	16	28	464	382	134	77903	chr2	5001374	5002183	+	promoter-TSS (ENSMUST00000150091.7)	#NAME?	-220	ENSMUST00000150091.7	ENSMUST00000150091	ENSMUST00000150091	ENSMUSG00000026669	Mcm10	minichromosome maintenance 10 replication initiation factor [Source:MGI Symbol;Acc:MGI:1917274]	2	4994525	5017602	-1
chr4_39330946_39331708	3.52959	2.37387	227.221	2.40681e-51	5.65241e-49	chr4 39330946 39331708	0.737391	0.596932	0.956292	1.1546	11.2659	9.9042	10.2403	13	11	20	49	496	386	182	99704	chr4	39330947	39331708	+	Intergenic	Intergenic	35864	ENSMUST00000104550.1	ENSMUST00000104550	ENSMUST00000104550	ENSMUSG00000077738	Gm23607	predicted gene, 23607 [Source:MGI Symbol;Acc:MGI:5453384]	4	39295463	39295588	1
chr1_154913984_154914369	5.07808	1.63107	226.982	2.71409e-51	6.36042e-49	chr1 154913984 154914369	0.0567224	0.1628	0.239073	0.235632	7.08661	7.23571	5.00761	1	3	5	10	312	282	89	7882	chr1	154913985	154914369	+	Intergenic	Intergenic	-29676	ENSMUST00000188321.1	ENSMUST00000188321	ENSMUST00000188321	ENSMUSG00000004110	Cacna1e	calcium channel, voltage-dependent, R type, alpha 1E subunit [Source:MGI Symbol;Acc:MGI:106217]	1	154266477	154760247	-1
chr13_9073771_9074285	2.7293	3.16663	226.919	2.80066e-51	6.54931e-49	chr13 9073771 9074285	2.09873	2.71333	2.67762	2.73333	17.7165	15.8313	17.8361	37	50	56	116	780	617	317	35932	chr13	9073772	9074285	+	intron (ENSMUST00000221989.1, intron 2 of 4)	-intron (ENSMUST00000221672.1, intron 2 of 2)	2423	ENSMUST00000221989.1	ENSMUST00000221989	ENSMUST00000221989	ENSMUSG00000113543	Gm36264	predicted gene, 36264 [Source:MGI Symbol;Acc:MGI:5595423]	13	9051468	9126487	-1
chr1_64381178_64381991	3.23676	2.78476	226.874	2.865e-51	6.6855e-49	chr1 64381178 64381991	1.19117	1.19386	2.00821	1.39023	14.5594	12.1621	14.4602	21	22	42	59	641	474	257	3101	chr1	64381179	64381991	+	Intergenic	Intergenic	-14749	ENSMUST00000175487.1	ENSMUST00000175487	ENSMUST00000175487	NA	NA	NA	NA	NA	NA	NA
chr9_22470994_22471221	4.59843	1.62181	226.358	3.71167e-51	8.64283e-49	chr9 22470994 22471221	0.170167	0.379866	0.191258	0.282759	5.67837	7.13307	6.41424	3	7	4	12	250	278	114	143378	chr9	22470995	22471221	+	Intergenic	Intergenic	-1365	ENSMUST00000216973.1	ENSMUST00000216973	ENSMUST00000216973	ENSMUSG00000032239	Rp9	retinitis pigmentosa 9 (human) [Source:MGI Symbol;Acc:MGI:2157166]	9	22322343	22381039	-1
chr2_3943373_3943982	5.43167	1.59248	225.839	4.81722e-51	1.11934e-48	chr2 3943373 3943982	0.113445	0.1628	0.239073	0.0942529	7.94972	5.41395	5.62653	2	3	5	4	350	211	100	77785	chr2	3943374	3943982	+	Intergenic	Intergenic	-14539	ENSMUST00000136489.1	ENSMUST00000136489	ENSMUST00000136489	ENSMUSG00000086445	Gm13191	predicted gene 13191 [Source:MGI Symbol;Acc:MGI:3650045]	2	3926845	3930176	-1
chr8_76551629_76552327	4.10697	2.28144	225.69	5.19184e-51	1.20384e-48	chr8 76551629 76552327	0.113445	0.759731	0.765034	0.636207	8.65384	10.3917	11.5344	2	14	16	27	381	405	205	138780	chr8	76551630	76552327	+	Intergenic	Intergenic	67304	ENSMUST00000185045.1	ENSMUST00000185045	ENSMUST00000185045	NA	NA	NA	NA	NA	NA	NA
chr17_56283846_56284576	3.53772	2.25036	225.63	5.34951e-51	1.23778e-48	chr17 56283846 56284576	1.021	0.759731	0.765034	0.777586	9.60781	8.49298	10.7467	18	14	16	33	423	331	191	65560	chr17	56283847	56284576	+	TTS (ENSMUST00000233070.1)	#NAME?	6300	ENSMUST00000019726.7	ENSMUST00000019726	ENSMUST00000019726	ENSMUSG00000024197	Plin3	perilipin 3 [Source:MGI Symbol;Acc:MGI:1914155]	17	56584476	56599873	-1
chr11_82288063_82288574	4.53129	2.62248	225.506	5.69432e-51	1.31479e-48	chr11 82288063 82288574	0.737391	0.542665	0.860663	0.259195	15.695	13.599	9.5651	13	10	18	11	691	530	170	24943	chr11	82288064	82288574	+	intron (ENSMUST00000138333.1, intron 2 of 10)	-intron (ENSMUST00000138333.1, intron 2 of 10)	17371	ENSMUST00000138333.1	ENSMUST00000138333	ENSMUST00000138333	ENSMUSG00000020702	Ccl1	C-C motif chemokine ligand 1 [Source:MGI Symbol;Acc:MGI:98258]	11	82067483	82196516	-1
chr4_5587358_5588944	3.23697	2.73612	225.454	5.8446e-51	1.34665e-48	chr4 5587358 5588944	1.87184	1.24813	1.19537	1.3431	11.3795	14.0865	14.3476	33	23	25	57	501	549	255	98281	chr4	5587359	5588944	+	Intergenic	Intergenic	15244	ENSMUST00000118328.1	ENSMUST00000118328	ENSMUST00000118328	ENSMUSG00000084237	Gm11781	predicted gene 11781 [Source:MGI Symbol;Acc:MGI:3650702]	4	5602924	5603395	-1
chr8_104599965_104600730	4.12549	1.94148	225.228	6.54612e-51	1.50513e-48	chr8 104599965 104600730	0.397057	0.596932	0.669405	0.259195	7.76802	7.74888	8.21473	7	11	14	11	342	302	146	140527	chr8	104599966	104600730	+	Intergenic	Intergenic	8897	ENSMUST00000059588.7	ENSMUST00000059588	ENSMUST00000059588	ENSMUSG00000048371	Pdp2	pyruvate dehydrogenase phosphatase catalytic subunit 2 [Source:MGI Symbol;Acc:MGI:1918878]	8	105318083	105325658	1
chr13_30570077_30570662	4.62987	1.89001	224.877	7.80975e-51	1.79191e-48	chr13 30570077 30570662	0.283612	0.705465	0.143444	0.212069	7.15475	7.44098	8.88991	5	13	3	9	315	290	158	37177	chr13	30570078	30570662	+	Intergenic	Intergenic	-25008	ENSMUST00000042834.3	ENSMUST00000042834	ENSMUST00000042834	ENSMUSG00000038462	Uqcrfs1	ubiquinol-cytochrome c reductase, Rieske iron-sulfur polypeptide 1 [Source:MGI Symbol;Acc:MGI:1913944]	13	30724291	30729345	-1
chr2_48411294_48412019	3.82311	2.30844	224.649	8.75706e-51	2.00249e-48	chr2 48411294 48412019	0.567224	0.651198	0.573775	0.942529	8.83555	9.75025	12.2658	10	12	12	40	389	380	218	80665	chr2	48411295	48412019	+	intron (ENSMUST00000127672.1, intron 1 of 5)	-intron (ENSMUST00000127672.1, intron 1 of 5)	23620	ENSMUST00000120948.1	ENSMUST00000120948	ENSMUST00000120948	ENSMUSG00000083866	Gm13472	predicted gene 13472 [Source:MGI Symbol;Acc:MGI:3649391]	2	48278049	48278362	1
chr15_57921344_57921970	4.39604	1.88702	224.647	8.76402e-51	2.00249e-48	chr15 57921344 57921970	0.680669	0.108533	0.478146	0.259195	8.26771	7.21005	7.53955	12	2	10	11	364	281	134	52166	chr15	57921345	57921970	+	intron (ENSMUST00000162157.1, intron 2 of 13)	-intron (ENSMUST00000022992.12, intron 3 of 20)	5644	ENSMUST00000162157.1	ENSMUST00000162157	ENSMUST00000162157	ENSMUSG00000022364	Tbc1d31	TBC1 domain family, member 31 [Source:MGI Symbol;Acc:MGI:2684931]	15	57775595	57833463	1
chr8_22520357_22520963	2.90098	2.88524	224.521	9.33687e-51	2.12894e-48	chr8 22520357 22520963	2.15545	2.00786	1.76914	1.76724	15.218	12.8293	14.7415	38	37	37	75	670	500	262	135889	chr8	22520358	22520963	+	intron (ENSMUST00000210854.1, intron 2 of 2)	-intron (ENSMUST00000067786.8, intron 1 of 10)	14434	ENSMUST00000210854.1	ENSMUST00000210854	ENSMUST00000210854	ENSMUSG00000037656	Slc20a2	solute carrier family 20, member 2 [Source:MGI Symbol;Acc:MGI:97851]	8	22966804	23059628	1
chr16_10349734_10350449	3.5185	2.1998	224.376	1.00464e-50	2.28598e-48	chr16 10349734 10350449	1.13445	0.705465	0.765034	0.683333	8.92641	9.54498	9.11497	20	13	16	29	393	372	162	56652	chr16	10349735	10350449	+	Intergenic	Intergenic	-2501	ENSMUST00000229862.1	ENSMUST00000229862	ENSMUST00000229862	ENSMUSG00000116270	Gm1600	predicted gene 1600 [Source:MGI Symbol;Acc:MGI:2686446]	16	10141969	10165455	-1
chr10_85508079_85508785	3.75223	2.43189	223.89	1.28226e-50	2.90561e-48	chr10 85508079 85508785	0.283612	0.759731	1.19537	0.918965	11.9019	10.3661	10.9155	5	14	25	39	524	404	194	16562	chr10	85508080	85508785	+	intron (ENSMUST00000105307.7, intron 1 of 16)	-intron (ENSMUST00000020231.9, intron 1 of 9)	-89969	ENSMUST00000105306.2	ENSMUST00000105306	ENSMUST00000105306	ENSMUSG00000020042	Abtb3	ankyrin repeat and BTB domain containing 3 [Source:MGI Symbol;Acc:MGI:1921257]	10	85222678	85496156	1
chr13_100721514_100722064	4.19897	1.83344	223.891	1.28133e-50	2.90561e-48	chr13 100721514 100722064	0.623947	0.379866	0.430332	0.259195	7.81344	7.44098	6.58304	11	7	9	11	344	290	117	41689	chr13	100721515	100722064	+	intron (ENSMUST00000225990.1, intron 3 of 10)	-intron (ENSMUST00000091299.7, intron 3 of 11)	-2419	ENSMUST00000225578.1	ENSMUST00000225578	ENSMUST00000225578	ENSMUSG00000069089	Cdk7	cyclin dependent kinase 7 [Source:MGI Symbol;Acc:MGI:102956]	13	100839139	100867447	-1
chr19_54123562_54124059	5.80185	1.82203	223.861	1.30105e-50	2.94211e-48	chr19 54123562 54124059	0.0567224	0.217066	0.0956292	0.141379	9.03997	8.59561	4.67002	1	4	2	6	398	335	83	77133	chr19	54123563	54124059	+	Intergenic	Intergenic	39252	ENSMUST00000236398.1	ENSMUST00000236398	ENSMUST00000236398	ENSMUSG00000117921	Gm50186	predicted gene, 50186 [Source:MGI Symbol;Acc:MGI:6302959]	19	54072990	54075089	1
chr13_62957266_62958119	2.99915	2.89959	223.777	1.35693e-50	3.06217e-48	chr13 62957266 62958119	1.41806	2.27919	1.81696	1.76724	12.9921	15.1385	15.6417	25	42	38	75	572	590	278	39709	chr13	62957267	62958119	+	Intergenic	Intergenic	-7200	ENSMUST00000222181.1	ENSMUST00000222181	ENSMUST00000222181	ENSMUSG00000021458	Aopep	aminopeptidase O [Source:MGI Symbol;Acc:MGI:1919311]	13	63112707	63473910	1
chr7_40686857_40687417	3.6722	2.41223	223.773	1.35989e-50	3.06254e-48	chr7 40686857 40687417	1.36134	0.813998	0.717219	0.636207	11.9927	10.0581	10.2965	24	15	15	27	528	392	183	128096	chr7	40686858	40687417	+	intron (ENSMUST00000207559.1, intron 3 of 4)	-intron (ENSMUST00000190160.1, intron 3 of 3)	12400	ENSMUST00000190160.1	ENSMUST00000190160	ENSMUST00000190160	ENSMUSG00000102004	4933402C06Rik	RIKEN cDNA 4933402C06 gene [Source:MGI Symbol;Acc:MGI:1918279]	7	40324161	40340697	1
chr11_43657860_43658534	4.1496	1.9355	223.569	1.50646e-50	3.38567e-48	chr11 43657860 43658534	0.567224	0.325599	0.239073	0.565517	6.81405	8.44166	8.60859	10	6	5	24	300	329	153	21717	chr11	43657861	43658534	+	Intergenic	Intergenic	-12604	ENSMUST00000122465.1	ENSMUST00000122465	ENSMUST00000122465	ENSMUSG00000083662	Gm12152	predicted gene 12152 [Source:MGI Symbol;Acc:MGI:3649296]	11	43561628	43562311	1
chr6_121072741_121073282	3.52265	2.24969	223.258	1.76134e-50	3.95041e-48	chr6 121072741 121073282	0.737391	0.596932	0.908478	0.966092	10.4255	9.59629	8.55232	13	11	19	41	459	374	152	124466	chr6	121072742	121073282	+	intron (ENSMUST00000204248.1, intron 1 of 14)	-intron (ENSMUST00000077159.7, intron 1 of 17)	8416	ENSMUST00000203697.1	ENSMUST00000203697	ENSMUST00000203697	ENSMUSG00000097011	Gm4651	predicted gene 4651 [Source:MGI Symbol;Acc:MGI:3782833]	6	121041425	121046915	1
chr3_86409864_86410482	3.81637	2.08982	223.21	1.80414e-50	4.03815e-48	chr3 86409864 86410482	0.623947	0.922531	0.382517	0.565517	9.33525	8.74956	7.76461	11	17	8	24	411	341	138	93567	chr3	86409865	86410482	+	intron (ENSMUST00000212390.1, intron 34 of 38)	-intron (ENSMUST00000107635.6, intron 35 of 56)	25926	ENSMUST00000082933.1	ENSMUST00000082933	ENSMUST00000082933	ENSMUSG00000064867	Gm25039	predicted gene, 25039 [Source:MGI Symbol;Acc:MGI:5454816]	3	86291554	86291660	1
chr18_83524943_83525740	3.67696	2.39876	223.007	1.99763e-50	4.46211e-48	chr18 83524943 83525740	0.340335	1.03106	0.908478	0.966092	12.0154	9.69893	10.5216	6	19	19	41	529	378	187	73164	chr18	83524944	83525740	+	promoter-TSS (ENSMUST00000237450.1)	#NAME?	-38	ENSMUST00000237450.1	ENSMUST00000237450	ENSMUST00000237450	ENSMUSG00000118175	Gm50416	predicted gene, 50416 [Source:MGI Symbol;Acc:MGI:6303337]	18	83514346	83543429	-1
chr13_69554823_69556386	3.28727	2.43076	222.7	2.33037e-50	5.19479e-48	chr13 69554823 69556386	0.794114	1.1396	1.05192	1.27241	10.1984	11.649	10.2403	14	21	22	54	449	454	182	40049	chr13	69554824	69556386	+	intron (ENSMUST00000143716.7, intron 1 of 3)	-intron (ENSMUST00000143716.7, intron 1 of 3)	-11582	ENSMUST00000070942.1	ENSMUST00000070942	ENSMUST00000070942	ENSMUSG00000051805	A530095I07Rik	RIKEN cDNA A530095I07 gene [Source:MGI Symbol;Acc:MGI:2685376]	13	69691165	69692142	-1
chr17_45526590_45527133	3.94459	2.34274	222.543	2.5212e-50	5.60877e-48	chr17 45526590 45527133	1.24789	0.705465	0.334702	0.541954	10.5391	11.0332	9.67763	22	13	7	23	464	430	172	64922	chr17	45526591	45527133	+	intron (ENSMUST00000113547.1, intron 1 of 4)	-intron (ENSMUST00000113547.1, intron 1 of 4)	3428	ENSMUST00000113547.1	ENSMUST00000113547	ENSMUST00000113547	ENSMUSG00000023949	Tcte1	t-complex-associated testis expressed 1 [Source:MGI Symbol;Acc:MGI:98640]	17	45834360	45853606	1
chr14_62580874_62581573	4.1512	1.97338	222.533	2.53386e-50	5.62552e-48	chr14 62580874 62581573	0.453779	0.379866	0.669405	0.353448	9.51696	7.46664	7.14569	8	7	14	15	419	291	127	46474	chr14	62580875	62581573	+	intron (ENSMUST00000161899.7, intron 2 of 2)	-intron (ENSMUST00000039064.7, intron 2 of 3)	-14303	ENSMUST00000209021.1	ENSMUST00000209021	ENSMUST00000209021	ENSMUSG00000100486	Gm4131	predicted gene 4131 [Source:MGI Symbol;Acc:MGI:3782307]	14	62700863	62804370	-1
chr2_132048129_132049062	2.98411	2.91627	222.455	2.63621e-50	5.84094e-48	chr2 132048129 132049062	1.64495	2.44199	1.48225	1.86149	15.0363	15.4978	13.4474	29	45	31	79	662	604	239	85735	chr2	132048130	132049062	+	Intergenic	Intergenic	8089	ENSMUST00000148749.1	ENSMUST00000148749	ENSMUST00000148749	ENSMUSG00000027340	Slc23a2	solute carrier family 23 (nucleobase transporters), member 2 [Source:MGI Symbol;Acc:MGI:1859682]	2	131894416	131987028	-1
chr16_15909282_15910094	3.84743	1.87961	222.403	2.70595e-50	5.98336e-48	chr16 15909282 15910094	0.453779	0.705465	0.430332	0.494828	7.04118	7.31268	8.15846	8	13	9	21	310	285	145	57032	chr16	15909283	15910094	+	intron (ENSMUST00000229846.1, intron 14 of 16)	-intron (ENSMUST00000040248.8, intron 14 of 19)	21272	ENSMUST00000210772.1	ENSMUST00000210772	ENSMUST00000210772	ENSMUSG00000071637	Cebpd	CCAAT/enhancer binding protein delta [Source:MGI Symbol;Acc:MGI:103573]	16	15705150	15708895	1
chr13_38554100_38555079	3.49798	2.6181	222.338	2.79527e-50	6.16843e-48	chr13 38554100 38555079	0.794114	0.596932	1.48225	1.3431	12.3561	12.9576	11.9845	14	11	31	57	544	505	213	37733	chr13	38554101	38555079	+	promoter-TSS (ENSMUST00000225387.1)	#NAME?	-275	ENSMUST00000225387.1	ENSMUST00000225387	ENSMUST00000225387	ENSMUSG00000114866	Gm40922	predicted gene, 40922 [Source:MGI Symbol;Acc:MGI:5623807]	13	38738841	38747795	1
chr13_67742785_67743554	4.85616	1.66628	221.743	3.76805e-50	8.2984e-48	chr13 67742785 67743554	0.170167	0.217066	0.191258	0.282759	6.76862	5.36264	8.15846	3	4	4	12	298	209	145	39957	chr13	67742786	67743554	+	intron (ENSMUST00000143812.1, intron 1 of 2)	-intron (ENSMUST00000143812.1, intron 1 of 2)	-1034	ENSMUST00000049518.4	ENSMUST00000049518	ENSMUST00000049518	ENSMUSG00000044081	Zfp85os	zinc finger protein 85, opposite strand [Source:MGI Symbol;Acc:MGI:1915521]	13	67877325	67904957	1
chr6_8173930_8174503	3.53266	2.72868	221.73	3.79358e-50	8.33789e-48	chr6 8173930 8174503	1.30462	0.759731	0.765034	1.62586	13.5372	12.6753	14.4039	23	14	16	69	596	494	256	117898	chr6	8173931	8174503	+	intron (ENSMUST00000213284.1, intron 3 of 3)	-intron (ENSMUST00000115537.1, intron 3 of 34)	5957	ENSMUST00000213284.1	ENSMUST00000213284	ENSMUST00000213284	ENSMUSG00000068794	Col28a1	collagen, type XXVIII, alpha 1 [Source:MGI Symbol;Acc:MGI:2685312]	6	7997808	8192617	-1
chr10_55547873_55548814	4.86862	1.65594	221.575	4.09998e-50	8.99331e-48	chr10 55547873 55548814	0.397057	0.325599	0.239073	0.0706896	6.08722	7.18439	6.47051	7	6	5	3	268	280	115	14133	chr10	55547874	55548814	+	Intergenic	Intergenic	423982	ENSMUST00000219650.1	ENSMUST00000219650	ENSMUST00000219650	ENSMUSG00000112755	Gm46190	predicted gene, 46190 [Source:MGI Symbol;Acc:MGI:5825827]	10	55000458	55000884	1
chr15_91007245_91007997	2.8926	3.18198	221.509	4.23892e-50	9.27952e-48	chr15 91007245 91007997	1.7584	2.98466	2.67762	2.09713	17.7392	18.4998	16.3732	31	55	56	89	781	721	291	54864	chr15	91007246	91007997	+	intron (ENSMUST00000109288.8, intron 1 of 32)	-intron (ENSMUST00000067205.15, intron 1 of 35)	-41219	ENSMUST00000229801.1	ENSMUST00000229801	ENSMUST00000229801	ENSMUSG00000022629	Kif21a	kinesin family member 21A [Source:MGI Symbol;Acc:MGI:109188]	15	90817479	90934151	-1
chr16_24033199_24033723	5.10552	1.26498	221.427	4.41691e-50	9.6499e-48	chr16 24033199 24033723	0.170167	0.108533	0.143444	0.141379	5.24682	4.82381	4.89508	3	2	3	6	231	188	87	57627	chr16	24033200	24033723	+	Intergenic	Intergenic	-6445	ENSMUST00000230357.1	ENSMUST00000230357	ENSMUST00000230357	ENSMUSG00000116290	Gm49518	predicted gene, 49518 [Source:MGI Symbol;Acc:MGI:6155211]	16	23858656	23879387	1
chr14_8061908_8062700	3.89881	2.27166	221.379	4.52546e-50	9.8674e-48	chr14 8061908 8062700	0.397057	0.542665	0.669405	0.895402	8.31314	10.2891	11.5344	7	10	14	38	366	401	205	43079	chr14	8061909	8062700	+	Intergenic	Intergenic	-18063	ENSMUST00000023924.3	ENSMUST00000023924	ENSMUST00000023924	ENSMUSG00000023156	Rpp14	ribonuclease P 14 subunit [Source:MGI Symbol;Acc:MGI:1914303]	14	14377939	14389406	-1
chr8_117022042_117022783	3.42125	2.32325	221.328	4.64321e-50	1.01041e-47	chr8 117022042 117022783	0.794114	0.705465	0.860663	1.20172	10.3346	9.69893	10.0715	14	13	18	51	455	378	179	141434	chr8	117022043	117022783	+	intron (ENSMUST00000162080.1, intron 1 of 7)	-intron (ENSMUST00000098375.5, intron 31 of 42)	1682	ENSMUST00000162080.1	ENSMUST00000162080	ENSMUST00000162080	ENSMUSG00000034416	Pkd1l2	polycystic kidney disease 1 like 2 [Source:MGI Symbol;Acc:MGI:2664668]	8	117722418	117809188	-1
chr5_137588124_137588695	4.09036	2.31215	220.935	5.65618e-50	1.2284e-47	chr5 137588124 137588695	0.907559	0.651198	0.430332	0.494828	11.6293	11.3154	7.59581	16	12	9	21	512	441	135	116397	chr5	137588125	137588695	+	TTS (ENSMUST00000031729.12)	#NAME?	5125	ENSMUST00000196450.4	ENSMUST00000196450	ENSMUST00000196450	ENSMUSG00000029716	Tfr2	transferrin receptor 2 [Source:MGI Symbol;Acc:MGI:1354956]	5	137568102	137585743	1
chr4_97629831_97630649	4.90399	1.93179	220.383	7.46098e-50	1.61716e-47	chr4 97629831 97630649	0.510502	0.488399	0.143444	0.0942529	6.95033	8.00547	9.45257	9	9	3	4	306	312	168	102639	chr4	97629832	97630649	+	intron (ENSMUST00000186369.1, intron 1 of 2)	-intron (ENSMUST00000146447.7, intron 3 of 5)	-45604	ENSMUST00000147925.7	ENSMUST00000147925	ENSMUST00000147925	ENSMUSG00000048747	E130114P18Rik	RIKEN cDNA E130114P18 gene [Source:MGI Symbol;Acc:MGI:2442873]	4	97456370	97666315	-1
chr1_113530368_113530855	3.83029	1.92631	220.376	7.48737e-50	1.61968e-47	chr1 113530368 113530855	0.794114	0.325599	0.573775	0.494828	7.54088	8.21073	7.31449	14	6	12	21	332	320	130	5650	chr1	113530369	113530855	+	Intergenic	Intergenic	35371	ENSMUST00000186856.1	ENSMUST00000186856	ENSMUST00000186856	ENSMUSG00000102105	Gm17946	predicted gene, 17946 [Source:MGI Symbol;Acc:MGI:5010131]	1	113493176	113493713	-1
chr17_27324877_27325579	4.23202	3.3677	220.329	7.66749e-50	1.65538e-47	chr17 27324877 27325579	1.13445	1.95359	0.812849	0.871839	27.1653	23.9394	14.2914	20	36	17	37	1196	933	254	63486	chr17	27324878	27325579	+	promoter-TSS (ENSMUST00000231336.1)	#NAME?	22	ENSMUST00000232125.1	ENSMUST00000232125	ENSMUST00000232125	ENSMUSG00000073430	Gm10505	predicted gene 10505 [Source:MGI Symbol;Acc:MGI:3642687]	17	27544009	27563807	1
chr2_138531138_138531790	4.84254	1.66926	220.272	7.88963e-50	1.69999e-47	chr2 138531138 138531790	0.397057	0.379866	0.0956292	0.141379	5.76923	7.56927	6.6393	7	7	2	6	254	295	118	86174	chr2	138531139	138531790	+	intron (ENSMUST00000128656.1, intron 5 of 5)	-intron (ENSMUST00000128656.1, intron 5 of 5)	-57928	ENSMUST00000155923.1	ENSMUST00000155923	ENSMUST00000155923	ENSMUSG00000085911	Gm14061	predicted gene 14061 [Source:MGI Symbol;Acc:MGI:3649736]	2	138431312	138491042	1
chr9_27695880_27696842	5.16313	1.42501	220.092	8.63569e-50	1.8571e-47	chr9 27695880 27696842	0.22689	0.1628	0.143444	0.117816	4.83798	6.46595	5.57026	4	3	3	5	213	252	99	143652	chr9	27695881	27696842	+	Intergenic	Intergenic	80176	ENSMUST00000213224.1	ENSMUST00000213224	ENSMUST00000213224	ENSMUSG00000110851	Gm48902	predicted gene, 48902 [Source:MGI Symbol;Acc:MGI:6098671]	9	27527481	27537194	1
chr9_104406467_104406853	4.669	1.4727	220.08	8.68655e-50	1.86438e-47	chr9 104406467 104406853	0.22689	0.108533	0.334702	0.212069	6.15536	5.61922	5.40147	4	2	7	9	271	219	96	149207	chr9	104406468	104406853	+	Intergenic	Intergenic	-19453	ENSMUST00000158781.1	ENSMUST00000158781	ENSMUST00000158781	ENSMUSG00000089406	Mir2136	microRNA 2136 [Source:MGI Symbol;Acc:MGI:4358922]	9	104303312	104303386	1
chr7_29089840_29090441	4.63495	1.97848	219.946	9.29499e-50	1.99107e-47	chr7 29089840 29090441	0.397057	0.651198	0.0478146	0.282759	9.5851	8.15942	6.86436	7	12	1	12	422	318	122	127463	chr7	29089841	29090441	+	exon (ENSMUST00000032813.9, exon 31 of 106)	-exon (ENSMUST00000032813.9, exon 31 of 106)	-6447	ENSMUST00000158594.1	ENSMUST00000158594	ENSMUST00000158594	ENSMUSG00000089219	Mir1963	microRNA 1963 [Source:MGI Symbol;Acc:MGI:3837208]	7	28783061	28783119	-1
chr6_33230018_33230525	4.15881	1.88597	219.914	9.44366e-50	2.01897e-47	chr6 33230018 33230525	0.22689	0.542665	0.669405	0.306322	7.38189	8.31337	7.03316	4	10	14	13	325	324	125	119136	chr6	33230019	33230525	+	Intergenic	Intergenic	17827	ENSMUST00000122048.1	ENSMUST00000122048	ENSMUST00000122048	ENSMUSG00000082217	Gm1401	predicted gene 1401 [Source:MGI Symbol;Acc:MGI:2686247]	6	33224263	33225034	-1
chr7_74502559_74503133	3.09038	2.97866	219.66	1.07278e-49	2.28904e-47	chr7 74502559 74503133	1.7584	2.55053	1.72133	1.41379	14.2187	16.1649	16.1481	31	47	36	60	626	630	287	129989	chr7	74502560	74503133	+	intron (ENSMUST00000136389.1, intron 1 of 1)	-intron (ENSMUST00000026897.13, intron 2 of 9)	1489	ENSMUST00000136389.1	ENSMUST00000136389	ENSMUST00000136389	ENSMUSG00000025790	Slco3a1	solute carrier organic anion transporter family, member 3a1 [Source:MGI Symbol;Acc:MGI:1351867]	7	73925167	74204528	-1
chr11_9372944_9373625	4.24589	1.75557	219.568	1.12387e-49	2.3934e-47	chr11 9372944 9373625	0.170167	0.217066	0.525961	0.447701	6.38249	7.26137	7.37075	3	4	11	19	281	283	131	20136	chr11	9372945	9373625	+	exon (ENSMUST00000042740.12, exon 30 of 62)	-exon (ENSMUST00000042740.12, exon 30 of 62)	179834	ENSMUST00000151522.1	ENSMUST00000151522	ENSMUST00000151522	ENSMUSG00000004668	Abca13	ATP-binding cassette, sub-family A member 13 [Source:MGI Symbol;Acc:MGI:2388707]	11	9141942	9634259	1
chr15_76366175_76366605	4.18398	1.89384	219.561	1.12751e-49	2.3965e-47	chr15 76366175 76366605	0.340335	0.488399	0.478146	0.377011	8.40399	8.33903	5.96412	6	9	10	16	370	325	106	53425	chr15	76366176	76366605	+	Intergenic	Intergenic	-2508	ENSMUST00000023213.7	ENSMUST00000023213	ENSMUST00000023213	ENSMUSG00000022554	Hgh1	HGH1 homolog [Source:MGI Symbol;Acc:MGI:1930628]	15	76253098	76255637	1
chr3_83688498_83689800	3.01784	2.61365	219.544	1.13741e-49	2.41287e-47	chr3 83688498 83689800	1.70167	1.19386	1.67351	1.3431	12.0154	11.5207	12.1533	30	22	35	57	529	449	216	93278	chr3	83688499	83689800	+	Intergenic	Intergenic	2428	ENSMUST00000194739.1	ENSMUST00000194739	ENSMUST00000194739	ENSMUSG00000102137	Rpl28-ps2	ribosomal protein L28, pseudogene 2 [Source:MGI Symbol;Acc:MGI:3781837]	3	83594028	83594581	1
chr10_82974085_82974686	5.00736	1.61792	219.469	1.18095e-49	2.5004e-47	chr10 82974085 82974686	0.397057	0.1628	0.143444	0.141379	7.58631	6.26068	5.23267	7	3	3	6	334	244	93	16303	chr10	82974086	82974686	+	Intergenic	Intergenic	-11112	ENSMUST00000040110.7	ENSMUST00000040110	ENSMUST00000040110	ENSMUSG00000034612	Chst11	carbohydrate sulfotransferase 11 [Source:MGI Symbol;Acc:MGI:1927166]	10	82821332	83031734	1
chr17_27105281_27106448	4.49797	3.27191	218.669	1.76497e-49	3.72973e-47	chr17 27105281 27106448	1.92856	0.705465	0.478146	0.683333	23.8719	22.5539	15.473	34	13	10	29	1051	879	275	63455	chr17	27105282	27106448	+	promoter-TSS (ENSMUST00000235521.1)	#NAME?	-312	ENSMUST00000235521.1	ENSMUST00000235521	ENSMUST00000235521	ENSMUSG00000042644	Itpr3	inositol 1,4,5-triphosphate receptor 3 [Source:MGI Symbol;Acc:MGI:96624]	17	27276278	27341197	1
chr17_11092684_11093790	3.0937	2.89729	218.64	1.79065e-49	3.77673e-47	chr17 11092684 11093790	1.87184	2.17066	1.33881	1.55517	16.4446	14.651	12.6034	33	40	28	66	724	571	224	62523	chr17	11092685	11093790	+	intron (ENSMUST00000233411.1, intron 2 of 6)	-intron (ENSMUST00000066658.12, intron 2 of 6)	-3769	ENSMUST00000190466.1	ENSMUST00000190466	ENSMUST00000190466	ENSMUSG00000100402	Gm28505	predicted gene 28505 [Source:MGI Symbol;Acc:MGI:5579211]	17	11301137	11308355	-1
chr18_57911206_57911717	4.79754	1.62173	218.3	2.12397e-49	4.47114e-47	chr18 57911206 57911717	0.453779	0.325599	0.0478146	0.164943	6.0645	7.15873	5.96412	8	6	1	7	267	279	106	71386	chr18	57911207	57911717	+	intron (ENSMUST00000115366.2, intron 11 of 26)	-intron (ENSMUST00000115366.2, intron 11 of 26)	-15743	ENSMUST00000236673.1	ENSMUST00000236673	ENSMUST00000236673	ENSMUSG00000024597	Slc12a2	solute carrier family 12, member 2 [Source:MGI Symbol;Acc:MGI:101924]	18	58011750	58079893	1
chr14_34591229_34591898	4.41355	1.74833	218.219	2.21291e-49	4.64945e-47	chr14 34591229 34591898	0.113445	0.1628	0.478146	0.424138	7.49545	7.18439	6.13291	2	3	10	18	330	280	109	45007	chr14	34591230	34591898	+	TTS (ENSMUST00000022331.2)	#NAME?	275	ENSMUST00000226806.1	ENSMUST00000226806	ENSMUST00000226806	ENSMUSG00000021799	Opn4	opsin 4 (melanopsin) [Source:MGI Symbol;Acc:MGI:1353425]	14	34312575	34322099	-1
chr4_70810804_70811337	3.42428	2.22354	218.192	2.24311e-49	4.70388e-47	chr4 70810804 70811337	1.021	0.705465	0.717219	0.966092	8.54028	10.0068	9.45257	18	13	15	41	376	390	168	101586	chr4	70810805	70811337	+	Intergenic	Intergenic	-261602	ENSMUST00000119774.1	ENSMUST00000119774	ENSMUST00000119774	ENSMUSG00000083549	Gm11227	predicted gene 11227 [Source:MGI Symbol;Acc:MGI:3651434]	4	70990910	70991380	1
chr17_27458052_27458685	5.02592	1.80825	218.081	2.37182e-49	4.96431e-47	chr17 27458052 27458685	0.397057	0.217066	0.0478146	0.235632	8.29043	8.33903	5.23267	7	4	1	10	365	325	93	63503	chr17	27458053	27458685	+	intron (ENSMUST00000232243.1, intron 2 of 9)	-intron (ENSMUST00000118161.2, intron 3 of 10)	10520	ENSMUST00000231818.1	ENSMUST00000231818	ENSMUST00000231818	ENSMUSG00000116568	Gm49790	predicted gene, 49790 [Source:MGI Symbol;Acc:MGI:6215316]	17	27687466	27687863	-1
chr6_148931267_148931890	3.82026	2.1564	217.885	2.61693e-49	5.46689e-47	chr6 148931267 148931890	0.397057	0.434132	0.62159	0.918965	9.03997	9.85288	8.43979	7	8	13	39	398	384	150	126292	chr6	148931268	148931890	+	TTS (ENSMUST00000143963.1)	#NAME?	1570	ENSMUST00000203164.2	ENSMUST00000203164	ENSMUST00000203164	ENSMUSG00000039985	Sinhcaf	SIN3-HDAC complex associated factor [Source:MGI Symbol;Acc:MGI:1929091]	6	148822533	148847965	-1
chr11_44616910_44617485	3.53663	2.69204	217.813	2.71282e-49	5.65643e-47	chr11 44616910 44617485	1.7584	0.596932	1.09974	1.08391	14.8773	12.0852	12.2658	31	11	23	46	655	471	218	21780	chr11	44616911	44617485	+	promoter-TSS (ENSMUST00000081265.11)	#NAME?	-119	ENSMUST00000101326.9	ENSMUST00000101326	ENSMUST00000101326	ENSMUSG00000057098	Ebf1	early B cell factor 1 [Source:MGI Symbol;Acc:MGI:95275]	11	44508144	44898918	1
chr1_74756550_74757152	4.84013	2.19793	217.413	3.31688e-49	6.90282e-47	chr1 74756550 74757152	0.0567224	0.379866	0.430332	0.400575	11.2659	11.3154	6.30171	1	7	9	17	496	441	112	3672	chr1	74756551	74757152	+	Intergenic	Intergenic	-7630	ENSMUST00000081636.12	ENSMUST00000081636	ENSMUST00000081636	ENSMUSG00000006542	Prkag3	protein kinase, AMP-activated, gamma 3 non-catalytic subunit [Source:MGI Symbol;Acc:MGI:1891343]	1	74778081	74788380	-1
chr19_9865649_9866276	4.87509	1.6888	217.375	3.37971e-49	7.02026e-47	chr19 9865649 9866276	0.113445	0.1628	0.525961	0.141379	6.33707	7.72322	6.13291	2	3	11	6	279	301	109	73957	chr19	9865650	9866276	+	exon (ENSMUST00000235839.1, exon 1 of 1)	-exon (ENSMUST00000235839.1, exon 1 of 1)	3032	ENSMUST00000235839.1	ENSMUST00000235839	ENSMUST00000235839	ENSMUSG00000118138	Gm50322	predicted gene, 50322 [Source:MGI Symbol;Acc:MGI:6303183]	19	9842288	9846359	-1
chr1_176681741_176682290	3.87586	1.8569	217.15	3.78513e-49	7.84752e-47	chr1 176681741 176682290	0.680669	0.379866	0.478146	0.471264	7.63174	7.8002	6.47051	12	7	10	20	336	304	115	9635	chr1	176681742	176682290	+	Intergenic	Intergenic	-18601	ENSMUST00000157250.1	ENSMUST00000157250	ENSMUST00000157250	ENSMUSG00000087875	Gm26104	predicted gene, 26104 [Source:MGI Symbol;Acc:MGI:5455881]	1	176528183	176528290	1
chr19_52592931_52593641	3.50405	2.16907	217.128	3.82616e-49	7.91762e-47	chr19 52592931 52593641	0.680669	0.651198	1.00411	0.801149	8.19957	8.92917	10.0715	12	12	21	34	361	348	179	76941	chr19	52592932	52593641	+	Intergenic	Intergenic	256121	ENSMUST00000236031.1	ENSMUST00000236031	ENSMUST00000236031	ENSMUSG00000118114	Gm50332	predicted gene, 50332 [Source:MGI Symbol;Acc:MGI:6303200]	19	52325603	52334371	1
chr18_67085549_67085906	5.16647	1.23028	216.448	5.38601e-49	1.11245e-46	chr18 67085549 67085906	0.170167	0.108533	0.143444	0.117816	4.70169	5.26	4.61375	3	2	3	5	207	205	82	72036	chr18	67085550	67085906	+	Intergenic	Intergenic	-2488	ENSMUST00000025402.14	ENSMUST00000025402	ENSMUST00000025402	ENSMUSG00000024524	Gnal	guanine nucleotide binding protein, alpha stimulating, olfactory type [Source:MGI Symbol;Acc:MGI:95774]	18	67221287	67359863	1
chr2_92281391_92282007	4.10994	1.94159	216.158	6.22872e-49	1.28409e-46	chr2 92281391 92282007	0.510502	0.542665	0.286888	0.471264	8.29043	8.98049	6.18918	9	10	6	20	365	350	110	83298	chr2	92281392	92282007	+	intron (ENSMUST00000162146.7, intron 6 of 6)	-intron (ENSMUST00000044036.14, intron 4 of 15)	-30455	ENSMUST00000119099.1	ENSMUST00000119099	ENSMUST00000119099	ENSMUSG00000081730	Gm13785	predicted gene 13785 [Source:MGI Symbol;Acc:MGI:3649781]	2	92142499	92143188	1
chr12_85139912_85140641	4.70786	2.82139	216.091	6.4412e-49	1.3254e-46	chr12 85139912 85140641	0.623947	0.759731	0.430332	0.518391	16.3764	20.1933	8.38353	11	14	9	22	721	787	149	33276	chr12	85139913	85140641	+	promoter-TSS (ENSMUST00000222232.1)	#NAME?	-288	ENSMUST00000222232.1	ENSMUST00000222232	ENSMUST00000222232	ENSMUSG00000019235	Rps6kl1	ribosomal protein S6 kinase-like 1 [Source:MGI Symbol;Acc:MGI:2443413]	12	85182023	85198038	-1
chr11_108279728_108280464	3.29001	3.45666	215.966	6.86115e-49	1.40917e-46	chr11 108279728 108280464	2.83612	2.33346	2.43855	1.6023	26.6656	22.2973	16.9358	50	43	51	68	1174	869	301	27391	chr11	108279729	108280464	+	intron (ENSMUST00000134725.1, intron 2 of 2)	-intron (ENSMUST00000059595.10, intron 2 of 16)	-63258	ENSMUST00000133383.7	ENSMUST00000133383	ENSMUST00000133383	ENSMUSG00000000049	Apoh	apolipoprotein H [Source:MGI Symbol;Acc:MGI:88058]	11	108234180	108305222	1
chr10_118787244_118787857	4.53084	1.79165	215.788	7.50357e-49	1.53536e-46	chr10 118787244 118787857	0.170167	0.379866	0.525961	0.212069	7.99515	5.95278	7.76461	3	7	11	9	352	232	138	18602	chr10	118787245	118787857	+	Intergenic	Intergenic	17708	ENSMUST00000218911.1	ENSMUST00000218911	ENSMUST00000218911	ENSMUSG00000112198	Gm4065	predicted gene 4065 [Source:MGI Symbol;Acc:MGI:3782240]	10	118639624	118641195	-1
chr18_61991931_61992583	5.16205	1.5033	215.789	7.49925e-49	1.53536e-46	chr18 61991931 61992583	0.113445	0.271333	0.0956292	0.164943	6.29164	6.7482	4.55749	2	5	2	7	277	263	81	71641	chr18	61991932	61992583	+	intron (ENSMUST00000236759.1, intron 5 of 9)	-intron (ENSMUST00000051720.5, intron 12 of 16)	14298	ENSMUST00000236759.1	ENSMUST00000236759	ENSMUST00000236759	ENSMUSG00000045629	Sh3tc2	SH3 domain and tetratricopeptide repeats 2 [Source:MGI Symbol;Acc:MGI:2444417]	18	62086146	62157473	1
chr2_156411256_156411980	4.03589	2.65505	215.631	8.11578e-49	1.65754e-46	chr2 156411256 156411980	0.907559	0.542665	0.908478	0.801149	14.7865	15.6774	8.49606	16	10	19	34	651	611	151	87476	chr2	156411257	156411980	+	promoter-TSS (ENSMUST00000102275.1)	#NAME?	-444	ENSMUST00000117690.1	ENSMUST00000117690	ENSMUST00000117690	ENSMUSG00000061272	Gm14173	predicted gene 14173 [Source:MGI Symbol;Acc:MGI:3650930]	2	156252817	156253094	-1
chr5_112585978_112586539	4.78305	2.21925	215.615	8.18232e-49	1.66802e-46	chr5 112585978 112586539	0.567224	0.271333	0.382517	0.259195	11.7883	11.1358	6.24545	10	5	8	11	519	434	111	114175	chr5	112585979	112586539	+	intron (ENSMUST00000183186.7, intron 2 of 4)	-intron (ENSMUST00000182949.1, intron 2 of 4)	3614	ENSMUST00000183300.1	ENSMUST00000183300	ENSMUST00000183300	ENSMUSG00000098027	Gm27004	predicted gene, 27004 [Source:MGI Symbol;Acc:MGI:5504119]	5	112730511	112731237	1
chr6_83126876_83127679	3.93218	2.40265	215.303	9.5722e-49	1.94774e-46	chr6 83126876 83127679	0.907559	1.1396	0.382517	0.541954	10.4028	12.6753	9.45257	16	21	8	23	458	494	168	121765	chr6	83126877	83127679	+	Intergenic	Intergenic	-1847	ENSMUST00000143814.1	ENSMUST00000143814	ENSMUST00000143814	ENSMUSG00000030034	Ino80b	INO80 complex subunit B [Source:MGI Symbol;Acc:MGI:1917270]	6	83098746	83102412	-1
chr18_60925077_60925983	2.66363	3.22138	215.281	9.67854e-49	1.96573e-46	chr18 60925077 60925983	2.32562	3.31026	2.48636	2.9454	18.5796	16.7294	17.611	41	61	52	125	818	652	313	71527	chr18	60925078	60925983	+	promoter-TSS (ENSMUST00000025519.10)	#NAME?	-88	ENSMUST00000102888.9	ENSMUST00000102888	ENSMUST00000102888	ENSMUSG00000024617	Camk2a	calcium/calmodulin-dependent protein kinase II alpha [Source:MGI Symbol;Acc:MGI:88256]	18	61058690	61121224	1
chr11_20987379_20988289	2.82929	3.35018	215.272	9.72108e-49	1.97072e-46	chr11 20987379 20988289	2.2689	3.03893	2.48636	3.15747	18.8068	17.3708	23.1813	40	56	52	134	828	677	412	20558	chr11	20987380	20988289	+	Intergenic	Intergenic	-50133	ENSMUST00000178821.1	ENSMUST00000178821	ENSMUST00000178821	NA	NA	NA	NA	NA	NA	NA
chr2_77779999_77780646	4.17101	1.83414	215.233	9.91181e-49	2.00568e-46	chr2 77779999 77780646	0.567224	0.651198	0.191258	0.306322	7.83616	6.85083	7.25822	10	12	4	13	345	267	129	82644	chr2	77780000	77780646	+	intron (ENSMUST00000111829.1, intron 1 of 3)	-intron (ENSMUST00000111829.1, intron 1 of 3)	36493	ENSMUST00000111831.7	ENSMUST00000111831	ENSMUST00000111831	ENSMUSG00000027016	Zfp385b	zinc finger protein 385B [Source:MGI Symbol;Acc:MGI:2444734]	2	77240978	77649983	-1
chr7_79603134_79603837	4.43591	1.72218	214.779	1.24553e-48	2.51573e-46	chr7 79603134 79603837	0.623947	0.271333	0.0478146	0.329885	6.70048	6.82517	7.03316	11	5	1	14	295	266	125	130318	chr7	79603135	79603837	+	TTS (ENSMUST00000161084.2)	#NAME?	190	ENSMUST00000206746.1	ENSMUST00000206746	ENSMUST00000206746	ENSMUSG00000108318	Gm45170	predicted gene 45170 [Source:MGI Symbol;Acc:MGI:5753746]	7	79251754	79253424	-1
chr7_67206011_67207013	3.37696	2.61758	214.645	1.33199e-48	2.68541e-46	chr7 67206011 67207013	0.907559	1.89933	0.956292	1.03678	11.6066	12.9832	12.2658	16	35	20	44	511	506	218	129589	chr7	67206012	67207013	+	intron (ENSMUST00000181631.1, intron 2 of 2)	-intron (ENSMUST00000181631.1, intron 2 of 2)	15946	ENSMUST00000181631.1	ENSMUST00000181631	ENSMUST00000181631	ENSMUSG00000097527	1700112J16Rik	RIKEN cDNA 1700112J16 gene [Source:MGI Symbol;Acc:MGI:1923878]	7	66853830	66872284	-1
chr1_127299622_127300203	3.87372	1.83819	214.539	1.40497e-48	2.82735e-46	chr1 127299622 127300203	0.340335	0.434132	0.478146	0.612644	7.97244	7.00478	6.75183	6	8	10	26	351	273	120	6222	chr1	127299623	127300203	+	intron (ENSMUST00000190921.1, intron 2 of 10)	-intron (ENSMUST00000038361.10, intron 2 of 17)	-6849	ENSMUST00000171405.1	ENSMUST00000171405	ENSMUST00000171405	ENSMUSG00000036155	Mgat5	mannoside acetylglucosaminyltransferase 5 [Source:MGI Symbol;Acc:MGI:894701]	1	127132752	127416073	1
chr15_97728420_97728967	3.94208	1.93328	214.368	1.53102e-48	3.07535e-46	chr15 97728420 97728967	0.453779	0.542665	0.478146	0.518391	8.81284	8.13376	6.18918	8	10	10	22	388	317	110	55415	chr15	97728421	97728967	+	intron (ENSMUST00000100249.9, intron 1 of 9)	-intron (ENSMUST00000100249.9, intron 1 of 9)	2645	ENSMUST00000100249.9	ENSMUST00000100249	ENSMUST00000100249	ENSMUSG00000022468	Endou	endonuclease, polyU-specific [Source:MGI Symbol;Acc:MGI:97746]	15	97608896	97629220	-1
chr10_115789664_115790143	4.53762	1.5102	214.201	1.66496e-48	3.33829e-46	chr10 115789664 115790143	0.397057	0.271333	0.286888	0.141379	5.86008	5.92712	5.79532	7	5	6	6	258	231	103	18292	chr10	115789665	115790143	+	Intergenic	Intergenic	-26928	ENSMUST00000217900.1	ENSMUST00000217900	ENSMUST00000217900	ENSMUSG00000034127	Tspan8	tetraspanin 8 [Source:MGI Symbol;Acc:MGI:2384918]	10	115652737	115685798	1
chr2_34792102_34793037	3.82901	2.29995	214.156	1.70314e-48	3.4024e-46	chr2 34792102 34793037	0.907559	0.651198	0.525961	0.73046	11.1296	11.3154	7.48328	16	12	11	31	490	441	133	80127	chr2	34792103	34793037	+	intron (ENSMUST00000141099.1, intron 2 of 4)	-intron (ENSMUST00000047963.6, intron 1 of 5)	2735	ENSMUST00000047963.6	ENSMUST00000047963	ENSMUST00000047963	ENSMUSG00000070953	Rabepk	Rab9 effector protein with kelch motifs [Source:MGI Symbol;Acc:MGI:2139530]	2	34667568	34689924	-1
chr11_77960834_77961705	4.06136	2.36203	214.156	1.70304e-48	3.4024e-46	chr11 77960834 77961705	0.623947	0.542665	0.573775	0.73046	13.3328	10.8792	7.42702	11	10	12	31	587	424	132	24535	chr11	77960835	77961705	+	intron (ENSMUST00000155087.7, intron 3 of 15)	-intron (ENSMUST00000000646.13, intron 3 of 15)	7417	ENSMUST00000151982.7	ENSMUST00000151982	ENSMUST00000151982	ENSMUSG00000000632	Sez6	seizure related gene 6 [Source:MGI Symbol;Acc:MGI:104745]	11	77821626	77869874	1
chr4_125571337_125572654	2.33614	3.968	214.096	1.75525e-48	3.50013e-46	chr4 125571337 125572654	6.40963	5.69799	5.68994	4.97184	30.6405	28.5323	26.2759	113	105	119	211	1349	1112	467	104704	chr4	125571338	125572654	+	intron (ENSMUST00000030676.7, intron 1 of 15)	-intron (ENSMUST00000030676.7, intron 1 of 15)	67247	ENSMUST00000102081.1	ENSMUST00000102081	ENSMUST00000102081	NA	NA	NA	NA	NA	NA	NA
chr2_53028278_53029215	3.40576	2.68864	214.019	1.82396e-48	3.63055e-46	chr2 53028278 53029215	0.737391	1.4652	1.19537	1.39023	10.9706	15.3695	12.6034	13	27	25	59	483	599	224	81001	chr2	53028279	53029215	+	intron (ENSMUST00000155586.8, intron 2 of 26)	-intron (ENSMUST00000049483.13, intron 2 of 26)	116562	ENSMUST00000133384.1	ENSMUST00000133384	ENSMUST00000133384	ENSMUSG00000061136	Prpf40a	pre-mRNA processing factor 40A [Source:MGI Symbol;Acc:MGI:1860512]	2	53024716	53081714	-1
chr3_125756298_125757340	3.27133	2.2122	213.958	1.88063e-48	3.73657e-46	chr3 125756298 125757340	0.964281	0.868264	0.956292	0.966092	8.44942	9.26273	9.79016	17	16	20	41	372	361	174	96186	chr3	125756299	125757340	+	Intergenic	Intergenic	46733	ENSMUST00000198101.1	ENSMUST00000198101	ENSMUST00000198101	ENSMUSG00000027971	Ndst4	N-deacetylase/N-sulfotransferase (heparin glucosaminyl) 4 [Source:MGI Symbol;Acc:MGI:1932545]	3	125197725	125522548	1
chr2_119052540_119053266	4.48531	2.05173	213.922	1.91503e-48	3.79804e-46	chr2 119052540 119053266	0.340335	0.434132	0.525961	0.282759	8.92641	10.6226	6.13291	6	8	11	12	393	414	109	84745	chr2	119052541	119053266	+	intron (ENSMUST00000028799.11, intron 1 of 7)	-intron (ENSMUST00000028799.11, intron 1 of 7)	-4378	ENSMUST00000028802.2	ENSMUST00000028802	ENSMUST00000028802	ENSMUSG00000027326	Knl1	kinetochore scaffold 1 [Source:MGI Symbol;Acc:MGI:1923714]	2	118877600	118935982	1
chr12_80083507_80084482	3.49627	3.05903	213.639	2.2084e-48	4.37195e-46	chr12 80083507 80084482	1.41806	1.4652	1.91258	1.24885	20.5103	18.038	11.872	25	27	40	53	903	703	211	32819	chr12	80083508	80084482	+	Intergenic	Intergenic	-2561	ENSMUST00000218323.1	ENSMUST00000218323	ENSMUST00000218323	ENSMUSG00000111933	Gm36660	predicted gene, 36660 [Source:MGI Symbol;Acc:MGI:5595819]	12	80065189	80128208	-1
chr8_58958214_58958758	4.05344	2.38265	213.346	2.55852e-48	5.05596e-46	chr8 58958214 58958758	0.170167	0.705465	0.956292	0.706896	9.31253	10.2121	13.3911	3	13	20	30	410	398	238	137879	chr8	58958215	58958758	+	Intergenic	Intergenic	-45846	ENSMUST00000204128.2	ENSMUST00000204128	ENSMUST00000204128	ENSMUSG00000096914	Galntl6	UDP-N-acetyl-alpha-D-galactosamine:polypeptide N-acetylgalactosaminyltransferase-like 6 [Source:MGI Symbol;Acc:MGI:1913581]	8	58227086	59365674	-1
chr1_121260291_121260861	4.72614	1.67809	212.66	3.61078e-48	7.12252e-46	chr1 121260291 121260861	0.22689	0.1628	0.0956292	0.400575	6.7232	5.72186	7.9334	4	3	2	17	296	223	141	5929	chr1	121260292	121260861	+	Intergenic	Intergenic	36300	ENSMUST00000191007.1	ENSMUST00000191007	ENSMUST00000191007	ENSMUSG00000101700	Gm29359	predicted gene 29359 [Source:MGI Symbol;Acc:MGI:5580065]	1	121152005	121155255	1
chr18_73596671_73597954	2.68672	3.41456	212.517	3.8783e-48	7.6365e-46	chr18 73596671 73597954	2.32562	2.82186	3.44265	3.77011	20.6239	20.0906	20.1992	41	52	72	160	908	783	359	72402	chr18	73596672	73597954	+	Intergenic	Intergenic	-14203	ENSMUST00000082593.1	ENSMUST00000082593	ENSMUST00000082593	ENSMUSG00000064527	Gm26438	predicted gene, 26438 [Source:MGI Symbol;Acc:MGI:5456215]	18	73744587	73744693	1
chr7_62045961_62046698	3.53944	2.13453	212.45	4.01234e-48	7.88626e-46	chr7 62045961 62046698	0.737391	0.813998	0.430332	0.942529	8.5857	8.82654	9.11497	13	15	9	40	378	344	162	129226	chr7	62045962	62046698	+	promoter-TSS (ENSMUST00000175367.1)	#NAME?	-82	ENSMUST00000175367.1	ENSMUST00000175367	ENSMUST00000175367	ENSMUSG00000093108	Mir344f	microRNA Mir344f [Source:MGI Symbol;Acc:MGI:4834320]	7	61695929	61695996	-1
chr10_92667186_92667767	4.84428	1.76454	212.364	4.189e-48	8.21876e-46	chr10 92667186 92667767	0.113445	0.325599	0.430332	0.164943	5.74652	7.08176	8.94618	2	6	9	7	253	276	159	16981	chr10	92667187	92667767	+	Intergenic	Intergenic	21531	ENSMUST00000157787.1	ENSMUST00000157787	ENSMUST00000157787	ENSMUSG00000088412	Gm24241	predicted gene, 24241 [Source:MGI Symbol;Acc:MGI:5454018]	10	92524726	92524870	-1
chr19_59588052_59588794	2.98726	2.71881	212.17	4.61793e-48	9.04414e-46	chr19 59588052 59588794	1.53151	1.4652	1.91258	1.53161	14.4231	12.1365	11.6469	27	27	40	65	635	473	207	77586	chr19	59588053	59588794	+	Intergenic	Intergenic	47972	ENSMUST00000238140.1	ENSMUST00000238140	ENSMUST00000238140	ENSMUSG00000118118	Gm18161	predicted gene, 18161 [Source:MGI Symbol;Acc:MGI:5010346]	19	59528883	59529410	1
chr15_84130885_84131750	3.96038	2.44138	212.058	4.88409e-48	9.54794e-46	chr15 84130885 84131750	0.850836	0.434132	0.860663	0.706896	13.1284	12.3674	7.82087	15	8	18	30	578	482	139	54326	chr15	84130886	84131750	+	intron (ENSMUST00000231019.1, intron 2 of 3)	-intron (ENSMUST00000231019.1, intron 2 of 3)	4014	ENSMUST00000231019.1	ENSMUST00000231019	ENSMUST00000231019	ENSMUSG00000115925	Gm33432	predicted gene, 33432 [Source:MGI Symbol;Acc:MGI:5592591]	15	84011505	84020460	1
chr8_71484095_71484343	4.52019	1.60764	212.055	4.89259e-48	9.54794e-46	chr8 71484095 71484343	0.397057	0.325599	0.286888	0.164943	6.85948	6.49161	5.3452	7	6	6	7	302	253	95	138514	chr8	71484096	71484343	+	promoter-TSS (ENSMUST00000212768.1)	#NAME?	-170	ENSMUST00000213016.1	ENSMUST00000213016	ENSMUST00000213016	ENSMUSG00000034863	Ano8	anoctamin 8 [Source:MGI Symbol;Acc:MGI:2687327]	8	71928663	71938607	-1
chr6_139171499_139172038	4.78183	1.45533	212.003	5.02191e-48	9.7829e-46	chr6 139171499 139172038	0.340335	0.271333	0.0478146	0.188506	6.17807	5.15737	5.73906	6	5	1	8	272	201	102	125587	chr6	139171500	139172038	+	Intergenic	Intergenic	24462	ENSMUST00000158278.1	ENSMUST00000158278	ENSMUST00000158278	ENSMUSG00000088903	Gm25434	predicted gene, 25434 [Source:MGI Symbol;Acc:MGI:5455211]	6	139173063	139173229	-1
chr5_53443905_53444475	3.76746	1.87251	211.991	5.05323e-48	9.82647e-46	chr5 53443905 53444475	0.567224	0.434132	0.382517	0.683333	7.83616	6.92781	7.48328	10	8	8	29	345	270	133	110703	chr5	53443906	53444475	+	Intergenic	Intergenic	-21962	ENSMUST00000201991.3	ENSMUST00000201991	ENSMUST00000201991	ENSMUSG00000039191	Rbpj	recombination signal binding protein for immunoglobulin kappa J region [Source:MGI Symbol;Acc:MGI:96522]	5	53623494	53814704	1
chr18_14685252_14685460	4.91427	1.63789	211.833	5.46869e-48	1.06152e-45	chr18 14685252 14685460	0.170167	0.108533	0.191258	0.306322	6.42792	5.28566	8.271	3	2	4	13	283	206	147	68685	chr18	14685253	14685460	+	Intergenic	Intergenic	-2442	ENSMUST00000040924.8	ENSMUST00000040924	ENSMUST00000040924	ENSMUSG00000037013	Ss18	SS18, subunit of BAF chromatin remodeling complex [Source:MGI Symbol;Acc:MGI:107708]	18	14757255	14815971	-1
chr10_39582321_39582839	5.03551	1.36407	211.83	5.4782e-48	1.06152e-45	chr10 39582321 39582839	0.0567224	0.217066	0.191258	0.164943	4.81526	5.15737	6.35798	1	4	4	7	212	201	113	13184	chr10	39582322	39582839	+	intron (ENSMUST00000124241.7, intron 2 of 2)	-intron (ENSMUST00000122987.1, intron 1 of 3)	5872	ENSMUST00000122987.1	ENSMUST00000122987	ENSMUST00000122987	ENSMUSG00000086915	Gm16364	predicted gene 16364 [Source:MGI Symbol;Acc:MGI:3840142]	10	39434492	39489678	-1
chr5_113164421_113165917	2.54779	4.27868	211.784	5.6047e-48	1.08412e-45	chr5 113164421 113165917	6.5798	6.13212	7.22001	5.18391	41.6793	38.4365	29.0329	116	113	151	220	1835	1498	516	114266	chr5	113164422	113165917	+	TTS (ENSMUST00000196549.1)	#NAME?	1065	ENSMUST00000196549.1	ENSMUST00000196549	ENSMUST00000196549	ENSMUSG00000106206	Gm43094	predicted gene 43094 [Source:MGI Symbol;Acc:MGI:5663231]	5	113313180	113314100	-1
chr1_37246394_37246950	5.2744	1.24509	211.553	6.29703e-48	1.21589e-45	chr1 37246394 37246950	0.113445	0.1628	0.191258	0.0706896	5.40581	4.87512	4.38869	2	3	4	3	238	190	78	1508	chr1	37246395	37246950	+	intron (ENSMUST00000195272.5, intron 4 of 6)	-intron (ENSMUST00000027288.9, intron 3 of 5)	27467	ENSMUST00000027288.9	ENSMUST00000027288	ENSMUST00000027288	ENSMUSG00000026114	Cnga3	cyclic nucleotide gated channel alpha 3 [Source:MGI Symbol;Acc:MGI:1341818]	1	37253515	37302465	1
chr19_57894190_57894808	3.47544	2.5346	211.533	6.35999e-48	1.22589e-45	chr19 57894190 57894808	1.13445	1.3024	0.956292	0.871839	12.5833	13.1115	8.94618	20	24	20	37	554	511	159	77459	chr19	57894191	57894808	+	intron (ENSMUST00000077282.6, intron 26 of 28)	-intron (ENSMUST00000077282.6, intron 26 of 28)	-156668	ENSMUST00000176631.1	ENSMUST00000176631	ENSMUST00000176631	ENSMUSG00000093757	Mir5623	microRNA 5623 [Source:MGI Symbol;Acc:MGI:5455845]	19	58039599	58039668	1
chr13_39955838_39956344	5.56656	1.09761	211.394	6.81928e-48	1.31211e-45	chr13 39955838 39956344	0.113445	0.0542665	0.0478146	0.117816	4.33828	4.82381	4.16363	2	1	1	5	191	188	74	37781	chr13	39955839	39956344	+	Intergenic	Intergenic	-71710	ENSMUST00000224937.1	ENSMUST00000224937	ENSMUST00000224937	ENSMUSG00000114957	Gm47316	predicted gene, 47316 [Source:MGI Symbol;Acc:MGI:6096197]	13	40030511	40037857	-1
chr8_124090359_124090944	5.29597	1.21575	211.279	7.22502e-48	1.38775e-45	chr8 124090359 124090944	0.0567224	0.0542665	0.143444	0.164943	4.83798	5.31132	4.27616	1	1	3	7	213	207	76	142210	chr8	124090360	124090944	+	intron (ENSMUST00000127664.1, intron 1 of 15)	-intron (ENSMUST00000127664.1, intron 1 of 15)	-42240	ENSMUST00000212460.1	ENSMUST00000212460	ENSMUST00000212460	ENSMUSG00000110704	Gm45732	predicted gene 45732 [Source:MGI Symbol;Acc:MGI:5804847]	8	124751811	124775151	-1
chr10_5865895_5866583	3.71325	2.28243	211.136	7.76426e-48	1.48871e-45	chr10 5865895 5866583	0.964281	0.759731	0.525961	0.777586	8.01787	10.1095	11.872	17	14	11	33	353	394	211	11317	chr10	5865896	5866583	+	intron (ENSMUST00000131996.7, intron 1 of 4)	-intron (ENSMUST00000019909.7, intron 3 of 6)	-42329	ENSMUST00000019908.8	ENSMUST00000019908	ENSMUST00000019908	ENSMUSG00000019774	Mtrf1l	mitochondrial translational release factor 1-like [Source:MGI Symbol;Acc:MGI:1918830]	10	5761887	5773910	-1
chr18_39232120_39232511	4.36148	1.64863	210.514	1.06126e-47	2.03131e-45	chr18 39232120 39232511	0.397057	0.0542665	0.430332	0.329885	6.54149	7.00478	5.73906	7	1	9	14	288	273	102	70251	chr18	39232121	39232511	+	intron (ENSMUST00000155576.7, intron 14 of 22)	-intron (ENSMUST00000097593.8, intron 14 of 22)	4948	ENSMUST00000154551.7	ENSMUST00000154551	ENSMUST00000154551	ENSMUSG00000036452	Arhgap26	Rho GTPase activating protein 26 [Source:MGI Symbol;Acc:MGI:1918552]	18	39126198	39509337	1
chr1_189767041_189767587	3.45024	2.02934	210.481	1.07871e-47	2.06111e-45	chr1 189767041 189767587	0.623947	0.868264	0.765034	0.706896	8.42671	8.416	7.37075	11	16	16	30	371	328	131	10646	chr1	189767042	189767587	+	intron (ENSMUST00000194127.5, intron 1 of 9)	-intron (ENSMUST00000097442.8, intron 1 of 18)	-19322	ENSMUST00000128275.1	ENSMUST00000128275	ENSMUST00000128275	ENSMUSG00000026604	Ptpn14	protein tyrosine phosphatase, non-receptor type 14 [Source:MGI Symbol;Acc:MGI:102467]	1	189460465	189608892	1
chr13_28992704_28993667	4.17669	1.78625	210.398	1.12445e-47	2.14477e-45	chr13 28992704 28993667	0.283612	0.1628	0.430332	0.541954	7.33646	7.6719	6.18918	5	3	9	23	323	299	110	37050	chr13	28992705	28993667	+	Intergenic	Intergenic	-21213	ENSMUST00000146336.1	ENSMUST00000146336	ENSMUST00000146336	ENSMUSG00000086363	A330102I10Rik	RIKEN cDNA A330102I10 gene [Source:MGI Symbol;Acc:MGI:1925170]	13	29198241	29225639	1
chr18_55504926_55505507	4.13745	2.06164	210.352	1.1511e-47	2.19178e-45	chr18 55504926 55505507	0.737391	0.759731	0.143444	0.400575	9.56238	8.44166	7.70834	13	14	3	17	421	329	137	71181	chr18	55504927	55505507	+	Intergenic	Intergenic	11897	ENSMUST00000192601.1	ENSMUST00000192601	ENSMUST00000192601	ENSMUSG00000103555	Gm37337	predicted gene, 37337 [Source:MGI Symbol;Acc:MGI:5610565]	18	55649194	55650186	-1
chr5_4308218_4309044	2.45557	3.91693	210.194	1.24632e-47	2.36898e-45	chr5 4308218 4309044	4.87813	4.50412	4.92491	5.93793	24.5987	28.4297	31.3398	86	83	103	252	1083	1108	557	107893	chr5	4308219	4309044	+	Intergenic	Intergenic	116264	ENSMUST00000177258.1	ENSMUST00000177258	ENSMUST00000177258	ENSMUSG00000053178	Mterf1b	mitochondrial transcription termination factor 1b [Source:MGI Symbol;Acc:MGI:3704243]	5	4242367	4247651	1
chr13_100908172_100908796	4.48963	2.34217	209.893	1.44925e-47	2.74993e-45	chr13 100908172 100908796	0.794114	0.542665	0.286888	0.353448	13.2647	11.1615	7.20196	14	10	6	15	584	435	128	41710	chr13	100908173	100908796	+	TTS (ENSMUST00000225803.1)	#NAME?	1405	ENSMUST00000225803.1	ENSMUST00000225803	ENSMUST00000225803	ENSMUSG00000114738	Gm41041	predicted gene, 41041 [Source:MGI Symbol;Acc:MGI:5623926]	13	101045605	101046397	-1
chr3_153919117_153919690	4.752	1.34866	209.885	1.45495e-47	2.75598e-45	chr3 153919117 153919690	0.113445	0.1628	0.286888	0.188506	5.11054	5.72186	4.89508	2	3	6	8	225	223	87	97906	chr3	153919118	153919690	+	Intergenic	Intergenic	6309	ENSMUST00000197294.1	ENSMUST00000197294	ENSMUST00000197294	ENSMUSG00000105820	Gm43400	predicted gene 43400 [Source:MGI Symbol;Acc:MGI:5663537]	3	153618732	153622495	1
chr1_172057412_172058079	4.24643	1.77209	209.678	1.61507e-47	3.05401e-45	chr1 172057412 172058079	0.340335	0.705465	0.334702	0.212069	6.99576	7.21005	6.8081	6	13	7	9	308	281	121	9330	chr1	172057413	172058079	+	promoter-TSS (ENSMUST00000059794.3)	#NAME?	-173	ENSMUST00000059794.3	ENSMUST00000059794	ENSMUST00000059794	ENSMUSG00000051251	Nhlh1	nescient helix loop helix 1 [Source:MGI Symbol;Acc:MGI:98481]	1	171879859	171885140	-1
chr10_76992364_76992899	4.76584	1.50246	209.564	1.71019e-47	3.22831e-45	chr10 76992364 76992899	0.170167	0.217066	0.239073	0.212069	6.24621	6.56859	4.61375	3	4	5	9	275	256	82	15695	chr10	76992365	76992899	+	intron (ENSMUST00000220294.1, intron 2 of 4)	-intron (ENSMUST00000220294.1, intron 2 of 4)	-8731	ENSMUST00000194879.1	ENSMUST00000194879	ENSMUST00000194879	ENSMUSG00000102522	Gm37782	predicted gene, 37782 [Source:MGI Symbol;Acc:MGI:5611010]	10	76819058	76819735	-1
chr8_72642819_72643410	4.90233	1.37041	209.454	1.80717e-47	3.40552e-45	chr8 72642819 72643410	0.170167	0.108533	0.0956292	0.259195	5.31496	4.87512	6.13291	3	2	2	11	234	190	109	138653	chr8	72642820	72643410	+	Intergenic	Intergenic	-3596	ENSMUST00000093427.10	ENSMUST00000093427	ENSMUST00000093427	ENSMUSG00000048148	Nwd1	NACHT and WD repeat domain containing 1 [Source:MGI Symbol;Acc:MGI:2442268]	8	73373339	73444504	1
chr2_168139734_168140515	4.63431	1.46963	209.321	1.93235e-47	3.63517e-45	chr2 168139734 168140515	0.283612	0.271333	0.239073	0.164943	6.13264	6.0041	4.83881	5	5	5	7	270	234	86	88712	chr2	168139735	168140515	+	intron (ENSMUST00000239040.1, intron 3 of 6)	-intron (ENSMUST00000239040.1, intron 3 of 6)	13408	ENSMUST00000142445.1	ENSMUST00000142445	ENSMUST00000142445	ENSMUSG00000085267	Gm14235	predicted gene 14235 [Source:MGI Symbol;Acc:MGI:3702169]	2	167989937	167995453	-1
chr9_40693687_40695704	2.57843	3.95895	209.285	1.96769e-47	3.69531e-45	chr9 40693687 40695704	4.08401	4.50412	4.73365	6.05575	33.3434	26.0178	28.6953	72	83	99	257	1468	1014	510	144419	chr9	40693688	40695704	+	intron (ENSMUST00000141759.1, intron 1 of 1)	-intron (ENSMUST00000034522.7, intron 1 of 6)	8661	ENSMUST00000141759.1	ENSMUST00000141759	ENSMUST00000141759	ENSMUSG00000032024	Clmp	CXADR-like membrane protein [Source:MGI Symbol;Acc:MGI:1918816]	9	40597258	40696615	1
chr13_32567917_32568444	5.04607	1.32237	209.193	2.06048e-47	3.86296e-45	chr13 32567917 32568444	0.170167	0.108533	0.239073	0.117816	5.31496	5.72186	4.38869	3	2	5	5	234	223	78	37328	chr13	32567918	32568444	+	Intergenic	Intergenic	-31766	ENSMUST00000221163.1	ENSMUST00000221163	ENSMUST00000221163	ENSMUSG00000113449	Gm48073	predicted gene, 48073 [Source:MGI Symbol;Acc:MGI:6097405]	13	32716902	32720398	-1
chr6_97059821_97060845	2.16532	4.07056	209.082	2.1787e-47	4.07763e-45	chr6 97059821 97060845	5.89913	6.72905	6.83749	7.09253	29.8455	28.8145	31.2272	104	124	143	301	1314	1123	555	122850	chr6	97059822	97060845	+	promoter-TSS (ENSMUST00000089295.5)	#NAME?	60	ENSMUST00000203930.1	ENSMUST00000203930	ENSMUST00000203930	ENSMUSG00000046500	Tafa4	TAFA chemokine like family member 4 [Source:MGI Symbol;Acc:MGI:2444563]	6	96808164	97037374	-1
chr12_54301701_54302492	4.28876	1.71056	208.998	2.27209e-47	4.24517e-45	chr12 54301701 54302492	0.567224	0.217066	0.430332	0.235632	7.29103	5.95278	6.97689	10	4	9	10	321	232	124	31340	chr12	54301702	54302492	+	Intergenic	Intergenic	14918	ENSMUST00000217997.1	ENSMUST00000217997	ENSMUST00000217997	ENSMUSG00000112705	Gm47552	predicted gene, 47552 [Source:MGI Symbol;Acc:MGI:6096571]	12	54362950	54363801	-1
chr17_23652008_23652440	6.21533	1.62174	208.702	2.6365e-47	4.91765e-45	chr17 23652008 23652440	0.22689	0.0542665	0.0956292	0.0235632	7.20018	8.00547	4.10737	4	1	2	1	317	312	73	63044	chr17	23652009	23652440	+	Intergenic	Intergenic	-6947	ENSMUST00000024696.8	ENSMUST00000024696	ENSMUST00000024696	ENSMUSG00000023903	Mmp25	matrix metallopeptidase 25 [Source:MGI Symbol;Acc:MGI:2443938]	17	23847285	23864251	-1
chr1_138939457_138940244	4.30806	1.94002	208.685	2.65866e-47	4.94217e-45	chr1 138939457 138940244	0.22689	0.488399	0.0956292	0.636207	7.97244	7.49229	8.66485	4	9	2	27	351	292	154	7286	chr1	138939458	138940244	+	Intergenic	Intergenic	23052	ENSMUST00000192016.1	ENSMUST00000192016	ENSMUST00000192016	ENSMUSG00000102365	Gm37045	predicted gene, 37045 [Source:MGI Symbol;Acc:MGI:5610273]	1	138888179	138890641	-1
chr13_60039354_60039876	5.22336	1.15518	208.687	2.6572e-47	4.94217e-45	chr13 60039354 60039876	0.113445	0.108533	0.0956292	0.141379	4.74712	4.208	5.00761	2	2	2	6	209	164	89	39597	chr13	60039355	60039876	+	intron (ENSMUST00000225266.1, intron 1 of 2)	-intron (ENSMUST00000225266.1, intron 1 of 2)	9904	ENSMUST00000225266.1	ENSMUST00000225266	ENSMUST00000225266	ENSMUSG00000114531	A530065N20Rik	RIKEN cDNA A530046M15 gene [Source:MGI Symbol;Acc:MGI:5439407]	13	60177525	60264483	1
chr12_81841451_81842042	5.05731	1.21452	208.482	2.94466e-47	5.46457e-45	chr12 81841451 81842042	0.113445	0.1628	0.0956292	0.164943	5.08782	4.9521	4.27616	2	3	2	7	224	193	76	32985	chr12	81841452	81842042	+	intron (ENSMUST00000221799.1, intron 2 of 2)	-intron (ENSMUST00000221799.1, intron 2 of 2)	13948	ENSMUST00000221799.1	ENSMUST00000221799	ENSMUST00000221799	ENSMUSG00000113950	Gm47080	predicted gene, 47080 [Source:MGI Symbol;Acc:MGI:6095805]	12	81874573	81899805	1
chr1_71421621_71422328	3.33641	2.24518	208.443	3.0033e-47	5.55458e-45	chr1 71421621 71422328	1.13445	1.08533	0.812849	0.777586	9.74409	8.54429	9.90269	20	20	17	33	429	333	176	3428	chr1	71421622	71422328	+	Intergenic	Intergenic	-7065	ENSMUST00000087268.6	ENSMUST00000087268	ENSMUST00000087268	ENSMUSG00000050296	Abca12	ATP-binding cassette, sub-family A member 12 [Source:MGI Symbol;Acc:MGI:2676312]	1	71281435	71454069	-1
chr17_15083784_15084321	4.19878	2.23994	208.446	2.99924e-47	5.55458e-45	chr17 15083784 15084321	0.794114	0.108533	0.286888	0.801149	9.60781	10.0068	10.0715	14	2	6	34	423	390	179	62787	chr17	15083785	15084321	+	intron (ENSMUST00000231568.1, intron 7 of 7)	-intron (ENSMUST00000231568.1, intron 7 of 7)	18438	ENSMUST00000186130.1	ENSMUST00000186130	ENSMUST00000186130	ENSMUSG00000036552	Ermard	ER membrane associated RNA degradation [Source:MGI Symbol;Acc:MGI:1917317]	17	15261470	15310306	1
chr14_30850215_30851161	3.20961	2.36916	208.399	3.06948e-47	5.66743e-45	chr14 30850215 30851161	0.907559	1.19386	1.14755	1.10747	11.4022	9.98117	8.94618	16	22	24	47	502	389	159	44644	chr14	30850216	30851161	+	intron (ENSMUST00000228066.1, intron 1 of 2)	-intron (ENSMUST00000006701.7, intron 1 of 7)	-15757	ENSMUST00000227776.1	ENSMUST00000227776	ENSMUST00000227776	ENSMUSG00000006526	Stimate	STIM activating enhancer [Source:MGI Symbol;Acc:MGI:1921500]	14	30547547	30599167	1
chr10_96722390_96722969	3.97261	2.13491	208.252	3.30517e-47	6.09234e-45	chr10 96722390 96722969	0.397057	0.868264	0.334702	0.65977	8.33585	7.97981	11.1405	7	16	7	28	367	311	198	17414	chr10	96722391	96722969	+	Intergenic	Intergenic	10873	ENSMUST00000219424.1	ENSMUST00000219424	ENSMUST00000219424	ENSMUSG00000112362	Gm48507	predicted gene, 48507 [Source:MGI Symbol;Acc:MGI:6098038]	10	96547669	96547948	1
chr2_50549877_50550758	3.25943	2.6694	208.006	3.74126e-47	6.8846e-45	chr2 50549877 50550758	1.53151	1.19386	1.53007	1.10747	10.2211	13.676	14.1788	27	22	32	47	450	533	252	80826	chr2	50549878	50550758	+	intron (ENSMUST00000146690.1, intron 3 of 4)	-intron (ENSMUST00000146690.1, intron 3 of 4)	2404	ENSMUST00000146690.1	ENSMUST00000146690	ENSMUST00000146690	ENSMUSG00000085429	Gm13485	predicted gene 13485 [Source:MGI Symbol;Acc:MGI:3651421]	2	50437926	50442270	1
chrX_75217865_75218484	5.03601	1.20692	207.914	3.91666e-47	7.19531e-45	chrX 75217865 75218484	0.22689	0.108533	0.0956292	0.141379	4.97426	4.92644	4.33243	4	2	2	6	219	192	77	152476	chrX	75217866	75218484	+	intron (ENSMUST00000114085.8, intron 21 of 24)	-intron (ENSMUST00000033539.12, intron 22 of 25)	-14888	ENSMUST00000121667.1	ENSMUST00000121667	ENSMUST00000121667	ENSMUSG00000083736	Gm6039	predicted gene 6039 [Source:MGI Symbol;Acc:MGI:3648055]	X	74276669	74277918	1
chr2_181931777_181932417	4.41266	2.08524	207.524	4.76588e-47	8.74076e-45	chr2 181931777 181932417	0.623947	0.379866	0.334702	0.353448	10.8798	9.23708	6.07665	11	7	7	15	479	360	108	89666	chr2	181931778	181932417	+	Intergenic	Intergenic	35274	ENSMUST00000119395.1	ENSMUST00000119395	ENSMUST00000119395	ENSMUSG00000083397	Gm5466	predicted gene 5466 [Source:MGI Symbol;Acc:MGI:3647828]	2	181538616	181540505	1
chr6_89288136_89288633	3.69809	1.96082	207.477	4.87799e-47	8.93145e-45	chr6 89288136 89288633	0.510502	0.325599	0.765034	0.706896	7.9043	8.44166	7.14569	9	6	16	30	348	329	127	122347	chr6	89288137	89288633	+	Intergenic	Intergenic	-2660	ENSMUST00000203704.1	ENSMUST00000203704	ENSMUST00000203704	ENSMUSG00000107622	4930512J16Rik	RIKEN cDNA 4930512J16 gene [Source:MGI Symbol;Acc:MGI:1922381]	6	89246493	89262707	-1
chr12_12812684_12813367	2.77239	2.8592	207.295	5.34737e-47	9.77455e-45	chr12 12812684 12813367	1.47478	2.27919	2.19947	2.07356	14.0824	14.0609	13.2786	26	42	46	88	620	548	236	29291	chr12	12812685	12813367	+	Intergenic	Intergenic	25041	ENSMUST00000171380.1	ENSMUST00000171380	ENSMUST00000171380	ENSMUSG00000091430	Platr19	pluripotency associated transcript 19 [Source:MGI Symbol;Acc:MGI:4936971]	12	12837986	12844286	1
chr16_83250231_83250955	3.80726	2.62437	207.247	5.47637e-47	9.99369e-45	chr16 83250231 83250955	1.19117	0.596932	0.430332	1.27241	11.016	13.1372	14.2914	21	11	9	54	485	512	254	60737	chr16	83250232	83250955	+	Intergenic	Intergenic	121140	ENSMUST00000095940.3	ENSMUST00000095940	ENSMUST00000095940	ENSMUSG00000071475	Rpl21-ps5	ribosomal protein L21, pseudogene 5 [Source:MGI Symbol;Acc:MGI:3647087]	16	83168142	83168621	-1
chr14_32317809_32318347	3.28923	2.38434	207.116	5.85048e-47	1.06587e-44	chr14 32317809 32318347	0.794114	0.868264	1.24318	1.20172	11.3567	10.5457	9.00244	14	16	26	51	500	411	160	44780	chr14	32317810	32318347	+	promoter-TSS (ENSMUST00000226980.1)	#NAME?	-93	ENSMUST00000226980.1	ENSMUST00000226980	ENSMUST00000226980	ENSMUSG00000115691	Gm48914	predicted gene, 48914 [Source:MGI Symbol;Acc:MGI:6118221]	14	32025619	32039942	-1
chr19_55640197_55640701	4.75368	1.67813	207.051	6.04356e-47	1.09922e-44	chr19 55640197 55640701	0.340335	0.108533	0.286888	0.235632	7.58631	7.31268	4.83881	6	2	6	10	334	285	86	77240	chr19	55640198	55640701	+	Intergenic	Intergenic	-101371	ENSMUST00000111662.10	ENSMUST00000111662	ENSMUST00000111662	NA	NA	NA	NA	NA	NA	NA
chr14_115602046_115602365	4.79267	1.42466	207.047	6.05531e-47	1.09953e-44	chr14 115602046 115602365	0.0567224	0.108533	0.334702	0.235632	5.13325	5.38829	6.41424	1	2	7	10	226	210	114	48997	chr14	115602047	115602365	+	intron (ENSMUST00000176912.7, intron 6 of 7)	-intron (ENSMUST00000022707.6, intron 6 of 7)	-45684	ENSMUST00000176139.1	ENSMUST00000176139	ENSMUST00000176139	ENSMUSG00000093589	Gm18367	predicted gene, 18367 [Source:MGI Symbol;Acc:MGI:5010552]	14	115793335	115793934	-1
chr13_40849793_40850471	4.40743	1.90811	206.964	6.31279e-47	1.14439e-44	chr13 40849793 40850471	0.22689	0.271333	0.239073	0.565517	8.08601	9.10878	6.07665	4	5	5	24	356	355	108	37800	chr13	40849794	40850471	+	Intergenic	Intergenic	3393	ENSMUST00000223759.1	ENSMUST00000223759	ENSMUST00000223759	ENSMUSG00000114560	Gm35160	predicted gene, 35160 [Source:MGI Symbol;Acc:MGI:5594319]	13	41000215	41001030	1
chr8_27104041_27104732	3.31669	2.92439	206.946	6.37206e-47	1.15323e-44	chr8 27104041 27104732	1.64495	2.11639	0.956292	1.46092	14.2868	13.2141	18.455	29	39	20	62	629	515	328	136285	chr8	27104042	27104732	+	intron (ENSMUST00000178514.7, intron 2 of 15)	-intron (ENSMUST00000033876.13, intron 2 of 18)	-9746	ENSMUST00000179207.2	ENSMUST00000179207	ENSMUST00000179207	ENSMUSG00000031486	Adgra2	adhesion G protein-coupled receptor A2 [Source:MGI Symbol;Acc:MGI:1925810]	8	27575611	27613464	1
chr13_96451349_96451891	3.50864	2.03871	206.858	6.65846e-47	1.20308e-44	chr13 96451349 96451891	0.567224	0.651198	0.956292	0.683333	8.94912	8.00547	7.53955	10	12	20	29	394	312	134	41270	chr13	96451350	96451891	+	intron (ENSMUST00000239137.1, intron 4 of 13)	-intron (ENSMUST00000055607.12, intron 5 of 14)	-5603	ENSMUST00000181074.1	ENSMUST00000181074	ENSMUST00000181074	ENSMUSG00000047117	Ankdd1b	ankyrin repeat and death domain containing 1B [Source:MGI Symbol;Acc:MGI:2444730]	13	96552642	96607775	-1
chr8_23580100_23580791	3.30138	2.15468	206.654	7.37614e-47	1.33056e-44	chr8 23580100 23580791	0.964281	0.651198	0.956292	0.942529	8.22229	8.74956	9.50883	17	12	20	40	362	341	169	135976	chr8	23580101	23580791	+	Intergenic	Intergenic	-55573	ENSMUST00000131410.7	ENSMUST00000131410	ENSMUST00000131410	ENSMUSG00000037492	Zmat4	zinc finger, matrin type 4 [Source:MGI Symbol;Acc:MGI:2443497]	8	24126035	24646601	1
chr6_88782953_88783556	3.84898	2.18929	206.62	7.50453e-47	1.35149e-44	chr6 88782953 88783556	0.623947	0.271333	0.765034	0.801149	11.1069	8.13376	8.72112	11	5	16	34	489	317	155	122301	chr6	88782954	88783556	+	intron (ENSMUST00000163271.7, intron 3 of 7)	-intron (ENSMUST00000089449.4, intron 3 of 7)	4196	ENSMUST00000204640.1	ENSMUST00000204640	ENSMUST00000204640	ENSMUSG00000107719	Gm43937	predicted gene, 43937 [Source:MGI Symbol;Acc:MGI:5690329]	6	88761312	88764433	-1
chr8_39954602_39955434	3.77177	2.16473	206.484	8.0346e-47	1.44458e-44	chr8 39954602 39955434	0.397057	0.868264	0.478146	0.824713	7.81344	10.5457	9.11497	7	16	10	35	344	411	162	136940	chr8	39954603	39955434	+	Intergenic	Intergenic	-61696	ENSMUST00000209880.1	ENSMUST00000209880	ENSMUST00000209880	ENSMUSG00000109815	Gm7082	predicted gene 7082 [Source:MGI Symbol;Acc:MGI:3647792]	8	40469755	40471289	1
chr9_119367972_119368889	3.82655	1.91314	206.427	8.27044e-47	1.48455e-44	chr9 119367972 119368889	0.453779	0.596932	0.382517	0.636207	8.76741	7.46664	6.52677	8	11	8	27	386	291	116	150332	chr9	119367973	119368889	+	intron (ENSMUST00000216838.1, intron 5 of 19)	-intron (ENSMUST00000039610.9, intron 6 of 18)	-2878	ENSMUST00000170400.8	ENSMUST00000170400	ENSMUST00000170400	NA	NA	NA	NA	NA	NA	NA
chr4_89072999_89073637	4.62966	1.30336	206.02	1.01426e-46	1.81763e-44	chr4 89072999 89073637	0.113445	0.271333	0.191258	0.212069	5.24682	5.13171	4.78255	2	5	4	9	231	200	85	102339	chr4	89073000	89073637	+	intron (ENSMUST00000129601.1, intron 1 of 1)	-intron (ENSMUST00000129601.1, intron 1 of 1)	14522	ENSMUST00000129601.1	ENSMUST00000129601	ENSMUST00000129601	ENSMUSG00000085183	Wincr1	WNT induced non-coding RNA 1 [Source:MGI Symbol;Acc:MGI:3649757]	4	88968545	89002851	1
chr8_34739705_34740745	4.21141	1.59796	205.884	1.08632e-46	1.94359e-44	chr8 34739705 34740745	0.340335	0.217066	0.382517	0.353448	7.04118	5.67054	5.79532	6	4	8	15	310	221	103	136660	chr8	34739706	34740745	+	Intergenic	Intergenic	-67072	ENSMUST00000033930.4	ENSMUST00000033930	ENSMUST00000033930	ENSMUSG00000031530	Dusp4	dual specificity phosphatase 4 [Source:MGI Symbol;Acc:MGI:2442191]	8	35274451	35287048	1
chr15_68366923_68367211	4.21843	1.61159	205.406	1.38082e-46	2.46647e-44	chr15 68366923 68367211	0.22689	0.271333	0.525961	0.306322	6.35978	5.61922	6.92063	4	5	11	13	280	219	123	52857	chr15	68366924	68367211	+	Intergenic	Intergenic	-3891	ENSMUST00000175699.1	ENSMUST00000175699	ENSMUST00000175699	ENSMUSG00000093387	Gm20732	predicted gene 20732 [Source:MGI Symbol;Acc:MGI:5318559]	15	68212832	68235025	-1
chr9_33367305_33368564	3.92106	1.78016	205.31	1.4493e-46	2.58458e-44	chr9 33367305 33368564	0.397057	0.217066	0.669405	0.494828	6.51877	7.00478	7.53955	7	4	14	21	287	273	134	144037	chr9	33367306	33368564	+	Intergenic	Intergenic	71691	ENSMUST00000215382.1	ENSMUST00000215382	ENSMUST00000215382	ENSMUSG00000111467	Gm47775	predicted gene, 47775 [Source:MGI Symbol;Acc:MGI:6096935]	9	33207540	33220099	1
chr17_24216923_24217153	4.76196	1.38064	205.281	1.47038e-46	2.61792e-44	chr17 24216923 24217153	0.340335	0.271333	0.0956292	0.141379	4.90612	5.49093	5.85159	6	5	2	6	216	214	104	63107	chr17	24216924	24217153	+	intron (ENSMUST00000137648.7, intron 7 of 8)	-intron (ENSMUST00000024930.7, intron 8 of 9)	3577	ENSMUST00000124557.2	ENSMUST00000124557	ENSMUST00000124557	ENSMUSG00000024118	Tedc2	tubulin epsilon and delta complex 2 [Source:MGI Symbol;Acc:MGI:1919266]	17	24434028	24439825	-1
chr15_50997116_50997753	3.86975	1.66746	204.932	1.75254e-46	3.11523e-44	chr15 50997116 50997753	0.453779	0.434132	0.430332	0.424138	6.58691	6.77386	5.73906	8	8	9	18	290	264	102	51727	chr15	50997117	50997753	+	Intergenic	Intergenic	99796	ENSMUST00000226611.1	ENSMUST00000226611	ENSMUST00000226611	ENSMUSG00000115339	Gm48913	predicted gene, 48913 [Source:MGI Symbol;Acc:MGI:6118219]	15	50761035	50809703	1
chr6_85435314_85435874	4.43799	1.78878	204.836	1.83898e-46	3.26359e-44	chr6 85435314 85435874	0.453779	0.1628	0.239073	0.400575	6.58691	8.87786	5.90785	8	3	5	17	290	346	105	121976	chr6	85435315	85435874	+	intron (ENSMUST00000152218.1, intron 1 of 4)	-intron (ENSMUST00000045693.7, intron 1 of 12)	3521	ENSMUST00000204615.1	ENSMUST00000204615	ENSMUST00000204615	ENSMUSG00000033706	Smyd5	SET and MYND domain containing 5 [Source:MGI Symbol;Acc:MGI:108048]	6	85408971	85423417	1
chr11_48464612_48465188	4.92367	1.19315	204.681	1.98804e-46	3.52242e-44	chr11 48464612 48465188	0.22689	0.0542665	0.191258	0.141379	4.56541	4.82381	4.78255	4	1	4	6	201	188	85	21968	chr11	48464613	48465188	+	Intergenic	Intergenic	87624	ENSMUST00000118344.1	ENSMUST00000118344	ENSMUST00000118344	ENSMUSG00000083954	Gm12179	predicted gene 12179 [Source:MGI Symbol;Acc:MGI:3651494]	11	48442080	48443351	-1
chr18_34728323_34728789	4.33904	1.75749	204.606	2.06386e-46	3.64806e-44	chr18 34728323 34728789	0.340335	0.434132	0.382517	0.259195	7.45003	7.90283	5.28894	6	8	8	11	328	308	94	69746	chr18	34728324	34728789	+	Intergenic	Intergenic	-7803	ENSMUST00000105038.2	ENSMUST00000105038	ENSMUST00000105038	ENSMUSG00000078240	Rpl27rt	ribosomal protein L29, retrotransposed [Source:MGI Symbol;Acc:MGI:3781727]	18	34869412	34871067	1
chr5_111980680_111981251	4.69053	1.92431	204.605	2.0656e-46	3.64806e-44	chr5 111980680 111981251	0.453779	0.271333	0.382517	0.188506	8.38128	9.67327	5.45773	8	5	8	8	369	377	97	114078	chr5	111980681	111981251	+	Intergenic	Intergenic	-36731	ENSMUST00000197648.1	ENSMUST00000197648	ENSMUST00000197648	ENSMUSG00000106060	Gm42488	predicted gene 42488 [Source:MGI Symbol;Acc:MGI:5662625]	5	112087670	112092101	-1
chr8_116115692_116117096	2.71148	3.12726	204.589	2.08153e-46	3.67028e-44	chr8 116115692 116117096	2.32562	1.89933	2.72543	2.99253	16.5581	17.4991	15.7543	41	35	57	127	729	682	280	141389	chr8	116115693	116117096	+	Intergenic	Intergenic	70975	ENSMUST00000212419.1	ENSMUST00000212419	ENSMUST00000212419	ENSMUSG00000110476	4930422C21Rik	RIKEN cDNA 4930422C21 gene [Source:MGI Symbol;Acc:MGI:1923031]	8	116908190	116914108	-1
chr12_73776078_73776787	4.42199	1.9598	204.494	2.18319e-46	3.84336e-44	chr12 73776078 73776787	0.510502	0.488399	0.286888	0.282759	7.7453	10.2378	6.02038	9	9	6	12	341	399	107	32330	chr12	73776079	73776787	+	intron (ENSMUST00000221153.1, intron 14 of 14)	-intron (ENSMUST00000021527.14, intron 13 of 13)	-17050	ENSMUST00000223088.1	ENSMUST00000223088	ENSMUST00000223088	ENSMUSG00000113321	Gm8075	predicted gene 8075 [Source:MGI Symbol;Acc:MGI:3643190]	12	73840257	73855185	1
chr9_78116977_78117388	4.66599	1.90451	204.295	2.41345e-46	4.24191e-44	chr9 78116977 78117388	0.510502	0.325599	0.239073	0.235632	6.58691	6.69688	10.8029	9	6	5	10	290	261	192	147686	chr9	78116978	78117388	+	intron (ENSMUST00000142776.1, intron 1 of 1)	-intron (ENSMUST00000009972.5, intron 1 of 1)	3868	ENSMUST00000044551.7	ENSMUST00000044551	ENSMUST00000044551	ENSMUSG00000009828	Cilk1	ciliogenesis associated kinase 1 [Source:MGI Symbol;Acc:MGI:1934157]	9	78016474	78079389	1
chr3_86712536_86713446	3.23814	2.36403	204.197	2.53562e-46	4.44951e-44	chr3 86712536 86713446	1.07773	1.03106	0.812849	1.27241	10.2211	11.1871	8.94618	19	19	17	54	450	436	159	93583	chr3	86712537	86713446	+	intron (ENSMUST00000195524.1, intron 8 of 17)	-intron (ENSMUST00000107635.6, intron 47 of 56)	-40823	ENSMUST00000119949.2	ENSMUST00000119949	ENSMUST00000119949	ENSMUSG00000094392	Gm3788	predicted gene 3788 [Source:MGI Symbol;Acc:MGI:3781961]	3	86579340	86579475	-1
chr2_34831177_34831598	4.25007	1.47549	204.095	2.66879e-46	4.67571e-44	chr2 34831177 34831598	0.170167	0.434132	0.334702	0.259195	5.65566	5.72186	5.62653	3	8	7	11	249	223	100	80133	chr2	34831178	34831598	+	TTS (ENSMUST00000121711.2)	#NAME?	548	ENSMUST00000121711.2	ENSMUST00000121711	ENSMUST00000121711	ENSMUSG00000081904	Gm13419	predicted gene 13419 [Source:MGI Symbol;Acc:MGI:3651671]	2	34720852	34721122	1
chr7_45134485_45134960	3.73743	2.4645	203.966	2.8466e-46	4.97928e-44	chr7 45134485 45134960	0.737391	1.1396	0.669405	0.824713	12.2199	13.2655	7.98967	13	21	14	35	538	517	142	128309	chr7	45134486	45134960	+	promoter-TSS (ENSMUST00000209612.1)	#NAME?	222	ENSMUST00000210612.1	ENSMUST00000210612	ENSMUST00000210612	ENSMUSG00000110206	Flt3l	FMS-like tyrosine kinase 3 ligand [Source:MGI Symbol;Acc:MGI:95560]	7	44779212	44785856	-1
chr9_26817533_26817984	5.04075	1.43368	203.913	2.92434e-46	5.10712e-44	chr9 26817533 26817984	0.113445	0.271333	0.0478146	0.212069	4.63355	5.87581	6.69557	2	5	1	9	204	229	119	143585	chr9	26817534	26817984	+	TTS (ENSMUST00000034448.5)	#NAME?	6585	ENSMUST00000211353.1	ENSMUST00000211353	ENSMUST00000211353	ENSMUSG00000031966	Glb1l3	galactosidase, beta 1 like 3 [Source:MGI Symbol;Acc:MGI:1918143]	9	26729249	26772186	-1
chr11_58292710_58293346	3.76873	1.92349	203.658	3.3233e-46	5.79465e-44	chr11 58292710 58293346	0.794114	0.596932	0.334702	0.541954	7.99515	8.28771	6.52677	14	11	7	23	352	323	116	22743	chr11	58292711	58293346	+	intron (ENSMUST00000108834.2, intron 6 of 6)	-intron (ENSMUST00000108834.2, intron 6 of 6)	-14041	ENSMUST00000153510.8	ENSMUST00000153510	ENSMUST00000153510	ENSMUSG00000037243	Zfp692	zinc finger protein 692 [Source:MGI Symbol;Acc:MGI:2144276]	11	58197895	58205453	1
chr5_110086121_110086695	4.4758	1.45714	203.46	3.67101e-46	6.39076e-44	chr5 110086121 110086695	0.340335	0.325599	0.286888	0.141379	5.65566	5.87581	5.28894	6	6	6	6	249	229	94	113872	chr5	110086122	110086695	+	intron (ENSMUST00000210052.1, intron 1 of 3)	-intron (ENSMUST00000210052.1, intron 1 of 3)	-5520	ENSMUST00000209865.1	ENSMUST00000209865	ENSMUST00000209865	ENSMUSG00000109771	Gm35315	predicted gene, 35315 [Source:MGI Symbol;Acc:MGI:5594474]	5	110224002	110242328	-1
chr18_13816865_13817491	4.50003	1.51421	203.378	3.8249e-46	6.64811e-44	chr18 13816865 13817491	0.113445	0.325599	0.239073	0.306322	5.0424	6.10673	6.75183	2	6	5	13	222	238	120	68644	chr18	13816866	13817491	+	exon (ENSMUST00000234502.1, exon 2 of 2)	-exon (ENSMUST00000234502.1, exon 2 of 2)	26654	ENSMUST00000234502.1	ENSMUST00000234502	ENSMUST00000234502	ENSMUSG00000024420	Zfp521	zinc finger protein 521 [Source:MGI Symbol;Acc:MGI:95459]	18	13820070	14105844	-1
chr6_124536218_124536921	4.74939	1.32015	203.326	3.92639e-46	6.81371e-44	chr6 124536218 124536921	0.0567224	0.271333	0.143444	0.235632	5.13325	4.74683	5.73906	1	5	3	10	226	185	102	124655	chr6	124536219	124536921	+	intron (ENSMUST00000162443.7, intron 5 of 11)	-intron (ENSMUST00000159143.1, intron 2 of 2)	3807	ENSMUST00000159143.1	ENSMUST00000159143	ENSMUST00000159143	ENSMUSG00000038521	C1s1	complement component 1, s subcomponent 1 [Source:MGI Symbol;Acc:MGI:1355312]	6	124507304	124519318	-1
chr8_108215009_108215682	4.617	1.54177	203.251	4.07751e-46	7.06479e-44	chr8 108215009 108215682	0.340335	0.434132	0.191258	0.117816	6.60963	5.90146	5.40147	6	8	4	5	291	230	96	140848	chr8	108215010	108215682	+	intron (ENSMUST00000221632.1, intron 3 of 4)	-intron (ENSMUST00000220518.1, intron 2 of 15)	220787	ENSMUST00000221632.1	ENSMUST00000221632	ENSMUST00000221632	ENSMUSG00000038872	Zfhx3	zinc finger homeobox 3 [Source:MGI Symbol;Acc:MGI:99948]	8	108669276	109688262	1
chr3_105825354_105826219	2.43235	3.75659	203.222	4.13804e-46	7.15835e-44	chr3 105825354 105826219	4.76468	4.55839	4.01643	5.06609	27.506	21.5275	25.9383	84	84	84	215	1211	839	461	95092	chr3	105825355	105826219	+	Intergenic	Intergenic	9174	ENSMUST00000196002.1	ENSMUST00000196002	ENSMUST00000196002	ENSMUSG00000104835	Gm5547	predicted gene 5547 [Source:MGI Symbol;Acc:MGI:3648206]	3	105722842	105724675	1
chr18_74287874_74288566	3.26267	2.3703	203.014	4.59329e-46	7.93337e-44	chr18 74287874 74288566	0.964281	0.868264	0.860663	1.39023	10.7208	9.49366	10.5779	17	16	18	59	472	370	188	72470	chr18	74287875	74288566	+	intron (ENSMUST00000176435.7, intron 2 of 8)	-intron (ENSMUST00000114895.3, intron 1 of 7)	5058	ENSMUST00000177101.7	ENSMUST00000177101	ENSMUST00000177101	ENSMUSG00000035394	Cfap53	cilia and flagella associated protein 53 [Source:MGI Symbol;Acc:MGI:1921703]	18	74416161	74493057	1
chr1_164896093_164896866	3.89219	2.41614	202.916	4.82475e-46	8.32004e-44	chr1 164896093 164896866	0.680669	0.325599	1.09974	0.777586	13.6735	10.0581	9.05871	12	6	23	33	602	392	161	8737	chr1	164896094	164896866	+	intron (ENSMUST00000194322.1, intron 2 of 3)	-intron (ENSMUST00000193955.1, intron 1 of 2)	3111	ENSMUST00000193955.1	ENSMUST00000193955	ENSMUST00000193955	ENSMUSG00000103659	Gm32569	predicted gene, 32569 [Source:MGI Symbol;Acc:MGI:5591728]	1	164631538	164727160	-1
chr19_45343331_45343811	4.12988	1.59243	202.849	4.99138e-46	8.59388e-44	chr19 45343331 45343811	0.397057	0.542665	0.191258	0.306322	6.33707	6.26068	5.73906	7	10	4	13	279	244	102	76442	chr19	45343332	45343811	+	Intergenic	Intergenic	-5136	ENSMUST00000235311.1	ENSMUST00000235311	ENSMUST00000235311	ENSMUSG00000100417	Gm28578	predicted gene 28578 [Source:MGI Symbol;Acc:MGI:5579284]	19	45288894	45326874	-1
chr2_128338438_128339585	2.98704	2.82692	202.463	6.05762e-46	1.04133e-43	chr2 128338438 128339585	1.81512	1.3024	2.15166	1.67299	15.8086	13.3681	12.0408	32	24	45	71	696	521	214	85396	chr2	128338439	128339585	+	intron (ENSMUST00000225087.1, intron 1 of 6)	-intron (ENSMUST00000135433.7, intron 1 of 2)	-84642	ENSMUST00000131961.1	ENSMUST00000131961	ENSMUST00000131961	ENSMUSG00000079053	Gm14010	predicted gene 14010 [Source:MGI Symbol;Acc:MGI:3649271]	2	128265574	128266485	1
chr4_21724762_21725251	4.21309	1.51076	202.274	6.66061e-46	1.1432e-43	chr4 21724762 21725251	0.170167	0.434132	0.286888	0.329885	5.3831	5.87581	6.30171	3	8	6	14	237	229	112	99093	chr4	21724763	21725251	+	Intergenic	Intergenic	-2694	ENSMUST00000065928.10	ENSMUST00000065928	ENSMUST00000065928	ENSMUSG00000028252	Ccnc	cyclin C [Source:MGI Symbol;Acc:MGI:1858199]	4	21727701	21759922	1
chr1_9469399_9470537	2.99568	3.12029	202.201	6.90938e-46	1.18404e-43	chr1 9469399 9470537	1.53151	2.06213	2.77325	2.12069	14.9228	15.9596	20.4806	27	38	58	90	657	622	364	226	chr1	9469400	9470537	+	Intergenic	Intergenic	11298	ENSMUST00000083691.1	ENSMUST00000083691	ENSMUST00000083691	ENSMUSG00000065625	Gm24765	predicted gene, 24765 [Source:MGI Symbol;Acc:MGI:5454542]	1	9528895	9528997	1
chr7_3572657_3574518	4.07353	2.43362	202.197	6.92474e-46	1.18482e-43	chr7 3572657 3574518	0.397057	0.434132	0.765034	0.895402	13.6281	11.9056	7.87714	7	8	16	38	600	464	140	126347	chr7	3572658	3574518	+	Intergenic	Intergenic	-5557	ENSMUST00000205290.1	ENSMUST00000205290	ENSMUST00000205290	ENSMUSG00000108758	Gm44921	predicted gene 44921 [Source:MGI Symbol;Acc:MGI:5753497]	7	3570730	3571030	-1
chr15_27579784_27580448	3.38405	2.32033	201.961	7.7948e-46	1.33161e-43	chr15 27579784 27580448	1.24789	0.542665	0.765034	1.1546	10.2438	9.36537	10.3528	22	10	16	49	451	365	184	50628	chr15	27579785	27580448	+	intron (ENSMUST00000134004.2, intron 1 of 4)	-intron (ENSMUST00000022875.6, intron 8 of 11)	8622	ENSMUST00000184426.1	ENSMUST00000184426	ENSMUST00000184426	ENSMUSG00000098416	Mir7117	microRNA 7117 [Source:MGI Symbol;Acc:MGI:5531111]	15	27571580	27571644	1
chr10_99417003_99418098	4.23222	1.86883	201.951	7.83685e-46	1.33671e-43	chr10 99417003 99418098	0.283612	0.813998	0.382517	0.235632	7.33646	6.95347	8.43979	5	15	8	10	323	271	150	17570	chr10	99417004	99418098	+	intron (ENSMUST00000189035.1, intron 2 of 2)	-intron (ENSMUST00000189035.1, intron 2 of 2)	-2971	ENSMUST00000060657.2	ENSMUST00000060657	ENSMUST00000060657	ENSMUSG00000044633	B530045E10Rik	RIKEN cDNA B530045E10 gene [Source:MGI Symbol;Acc:MGI:2445145]	10	99134750	99258909	1
chr3_101212448_101213481	3.79366	2.02414	201.872	8.15262e-46	1.38841e-43	chr3 101212448 101213481	0.510502	0.759731	0.430332	0.636207	9.47153	8.51864	6.52677	9	14	9	27	417	332	116	94711	chr3	101212449	101213481	+	Intergenic	Intergenic	-5566	ENSMUST00000120887.1	ENSMUST00000120887	ENSMUST00000120887	ENSMUSG00000082415	Gm12486	predicted gene 12486 [Source:MGI Symbol;Acc:MGI:3650949]	3	101114175	101114715	-1
chr18_9554753_9555499	2.89279	3.09962	201.84	8.28726e-46	1.40916e-43	chr18 9554753 9555499	2.15545	2.93039	1.48225	2.35632	16.1947	15.5491	18.1737	38	54	31	100	713	606	323	68381	chr18	9554754	9555499	+	Intergenic	Intergenic	7829	ENSMUST00000234100.1	ENSMUST00000234100	ENSMUST00000234100	ENSMUSG00000117641	Gm46641	predicted gene, 46641 [Source:MGI Symbol;Acc:MGI:5826278]	18	9547297	9552238	1
chr3_89330319_89331505	3.23222	2.44156	201.813	8.39976e-46	1.42607e-43	chr3 89330319 89331505	1.41806	1.08533	1.19537	0.942529	11.9246	10.9562	9.00244	25	20	25	40	525	427	160	93874	chr3	89330320	89331505	+	Intergenic	Intergenic	-6938	ENSMUST00000180791.1	ENSMUST00000180791	ENSMUST00000180791	ENSMUSG00000097004	4731419I09Rik	RIKEN cDNA 4731419I09 gene [Source:MGI Symbol;Acc:MGI:3704222]	3	89245157	89255138	1
chr4_65816774_65817478	3.07671	3.01814	201.697	8.90257e-46	1.5091e-43	chr4 65816774 65817478	1.30462	1.68226	1.72133	2.59195	14.7638	15.7287	17.6673	23	31	36	110	650	613	314	101438	chr4	65816775	65817478	+	intron (ENSMUST00000084496.2, intron 9 of 21)	-intron (ENSMUST00000068214.10, intron 10 of 22)	211877	ENSMUST00000155978.1	ENSMUST00000155978	ENSMUST00000155978	ENSMUSG00000051675	Trim32	tripartite motif-containing 32 [Source:MGI Symbol;Acc:MGI:1917057]	4	65523223	65534475	1
chr11_68498700_68499804	4.07998	2.09642	201.692	8.92597e-46	1.51073e-43	chr11 68498700 68499804	0.907559	0.434132	0.239073	0.518391	10.5618	8.36468	7.31449	16	8	5	22	465	326	130	23576	chr11	68498701	68499804	+	Intergenic	Intergenic	-3767	ENSMUST00000102613.7	ENSMUST00000102613	ENSMUST00000102613	ENSMUSG00000046207	Pik3r6	phosphoinositide-3-kinase regulatory subunit 5 [Source:MGI Symbol;Acc:MGI:2144613]	11	68393845	68443524	1
chr18_6760812_6761193	3.46501	1.89325	201.545	9.61108e-46	1.62418e-43	chr18 6760812 6761193	0.623947	0.488399	0.717219	0.754023	7.60902	7.00478	7.53955	11	9	15	32	335	273	134	68248	chr18	6760813	6761193	+	promoter-TSS (ENSMUST00000234092.1)	#NAME?	-44	ENSMUST00000234092.1	ENSMUST00000234092	ENSMUST00000234092	ENSMUSG00000117359	Gm7466	predicted gene 7466 [Source:MGI Symbol;Acc:MGI:3648356]	18	6760516	6760959	-1
chr5_48517918_48518353	4.70965	1.9473	201.457	1.00426e-45	1.69449e-43	chr5 48517918 48518353	0.340335	0.434132	0.478146	0.117816	7.49545	6.69688	10.5216	6	8	10	5	330	261	187	110450	chr5	48517919	48518353	+	intron (ENSMUST00000087395.10, intron 1 of 8)	-intron (ENSMUST00000087395.10, intron 1 of 8)	19805	ENSMUST00000200461.1	ENSMUST00000200461	ENSMUST00000200461	ENSMUSG00000105653	Gm43831	predicted gene 43831 [Source:MGI Symbol;Acc:MGI:5663968]	5	48692686	48695283	-1
chr2_159993602_159994362	3.86723	2.54211	201.421	1.02289e-45	1.72328e-43	chr2 159993602 159994362	1.07773	0.759731	0.812849	0.683333	15.218	12.1878	8.15846	19	14	17	29	670	475	145	87844	chr2	159993603	159994362	+	Intergenic	Intergenic	15708	ENSMUST00000118114.1	ENSMUST00000118114	ENSMUST00000118114	ENSMUSG00000083329	Gm14220	predicted gene 14220 [Source:MGI Symbol;Acc:MGI:3702164]	2	159820194	159820642	1
chr12_14917663_14918474	3.40374	2.6091	201.284	1.09579e-45	1.84326e-43	chr12 14917663 14918474	1.24789	1.35666	0.525961	1.41379	10.9933	13.1115	12.7722	22	25	11	60	484	511	227	29411	chr12	14917664	14918474	+	Intergenic	Intergenic	-12038	ENSMUST00000223036.1	ENSMUST00000223036	ENSMUST00000223036	ENSMUSG00000114066	Gm9202	predicted gene 9202 [Source:MGI Symbol;Acc:MGI:3644604]	12	14980108	14980544	1
chr7_125953693_125954362	3.23398	2.30532	201.248	1.11571e-45	1.87389e-43	chr7 125953693 125954362	0.907559	0.976797	1.24318	0.989655	11.1069	9.10878	8.83365	16	18	26	42	489	355	157	133419	chr7	125953694	125954362	+	intron (ENSMUST00000073935.6, intron 3 of 6)	-intron (ENSMUST00000073935.6, intron 3 of 6)	88757	ENSMUST00000155059.2	ENSMUST00000155059	ENSMUST00000155059	ENSMUSG00000032743	Katnip	katanin interacting protein [Source:MGI Symbol;Acc:MGI:2442760]	7	125307060	125473965	1
chr12_107758170_107759193	4.05814	2.12179	200.891	1.33455e-45	2.23802e-43	chr12 107758170 107759193	0.283612	0.922531	0.525961	0.447701	10.8571	8.54429	7.25822	5	17	11	19	478	333	129	34697	chr12	107758171	107759193	+	intron (ENSMUST00000134448.1, intron 1 of 1)	-intron (ENSMUST00000134448.1, intron 1 of 1)	-23186	ENSMUST00000144556.1	ENSMUST00000144556	ENSMUST00000144556	ENSMUSG00000085641	4930465M20Rik	RIKEN cDNA 4930465M20 gene [Source:MGI Symbol;Acc:MGI:1922218]	12	107689999	107701755	-1
chr2_90636688_90637329	4.08966	1.61218	200.829	1.37677e-45	2.30529e-43	chr2 90636688 90637329	0.283612	0.325599	0.430332	0.377011	6.76862	6.49161	5.23267	5	6	9	16	298	253	93	83107	chr2	90636689	90637329	+	Intergenic	Intergenic	-40206	ENSMUST00000057481.6	ENSMUST00000057481	ENSMUST00000057481	ENSMUSG00000051329	Nup160	nucleoporin 160 [Source:MGI Symbol;Acc:MGI:1926227]	2	90507559	90566672	1
chr7_127219488_127219913	4.60893	1.55786	200.754	1.42977e-45	2.38869e-43	chr7 127219488 127219913	0.453779	0.1628	0.191258	0.212069	6.31435	6.90215	4.83881	8	3	4	9	278	269	86	133577	chr7	127219489	127219913	+	intron (ENSMUST00000133913.7, intron 1 of 5)	-intron (ENSMUST00000133913.7, intron 1 of 5)	-1203	ENSMUST00000106314.7	ENSMUST00000106314	ENSMUST00000106314	ENSMUSG00000000486	Septin1	septin 1 [Source:MGI Symbol;Acc:MGI:1858916]	7	126813619	126832302	-1
chr4_70290297_70291027	3.37202	2.71102	200.753	1.43093e-45	2.38869e-43	chr4 70290297 70291027	1.36134	0.813998	1.00411	1.72011	12.4924	11.7773	15.5292	24	15	21	73	550	459	276	101547	chr4	70290298	70291027	+	intron (ENSMUST00000144099.7, intron 19 of 36)	-intron (ENSMUST00000076541.12, intron 16 of 33)	-25982	ENSMUST00000138561.7	ENSMUST00000138561	ENSMUST00000138561	ENSMUSG00000039298	Cdk5rap2	CDK5 regulatory subunit associated protein 2 [Source:MGI Symbol;Acc:MGI:2384875]	4	70135093	70328680	-1
chr12_86862405_86863039	4.64412	1.56268	200.708	1.46317e-45	2.4388e-43	chr12 86862405 86863039	0.113445	0.379866	0.191258	0.259195	5.74652	7.41532	5.06387	2	7	4	11	253	289	90	33467	chr12	86862406	86863039	+	Intergenic	Intergenic	-16255	ENSMUST00000222765.1	ENSMUST00000222765	ENSMUST00000222765	ENSMUSG00000113555	Gm10095	predicted gene 10095 [Source:MGI Symbol;Acc:MGI:3642130]	12	86892552	86893241	-1
chr15_4949562_4950225	4.91063	1.38208	200.496	1.62756e-45	2.70869e-43	chr15 4949562 4950225	0.283612	0.217066	0.191258	0.0942529	4.61084	6.13239	5.514	5	4	4	4	203	239	98	49781	chr15	4949563	4950225	+	intron (ENSMUST00000228458.1, intron 16 of 20)	-intron (ENSMUST00000045736.8, intron 37 of 41)	1412	ENSMUST00000226849.1	ENSMUST00000226849	ENSMUST00000226849	ENSMUSG00000022155	Mroh2b	maestro heat-like repeat family member 2B [Source:MGI Symbol;Acc:MGI:1921905]	15	4928219	4991687	1
chr7_116573731_116575084	3.67856	1.90672	200.469	1.64973e-45	2.74143e-43	chr7 116573731 116575084	0.680669	0.759731	0.62159	0.400575	7.54088	8.03112	6.86436	12	14	13	17	332	313	122	132777	chr7	116573732	116575084	+	Intergenic	Intergenic	27543	ENSMUST00000206533.1	ENSMUST00000206533	ENSMUST00000206533	ENSMUSG00000108456	4732496C06Rik	RIKEN cDNA 4732496C06 gene [Source:MGI Symbol;Acc:MGI:2442534]	7	116146100	116148599	1
chr6_14928568_14929339	4.94516	1.29799	200.383	1.72295e-45	2.85876e-43	chr6 14928568 14929339	0.340335	0.108533	0.0478146	0.164943	4.61084	5.67054	5.00761	6	2	1	7	203	221	89	118151	chr6	14928569	14929339	+	intron (ENSMUST00000156883.2, intron 1 of 3)	-intron (ENSMUST00000115477.7, intron 1 of 18)	25497	ENSMUST00000156883.2	ENSMUST00000156883	ENSMUST00000156883	ENSMUSG00000029563	Foxp2	forkhead box P2 [Source:MGI Symbol;Acc:MGI:2148705]	6	14901348	15441976	1
chr10_128242596_128243179	4.41644	1.46623	200.305	1.79159e-45	2.96817e-43	chr10 128242596 128243179	0.283612	0.325599	0.143444	0.282759	5.86008	6.15805	4.83881	5	6	3	12	258	240	86	19400	chr10	128242597	128243179	+	exon (ENSMUST00000135376.1, exon 2 of 2)	-exon (ENSMUST00000135376.1, exon 2 of 2)	259	ENSMUST00000142149.1	ENSMUST00000142149	ENSMUST00000142149	ENSMUSG00000039994	Timeless	timeless circadian clock 1 [Source:MGI Symbol;Acc:MGI:1321393]	10	128067934	128088810	1
chr6_148550897_148551552	4.2928	1.73677	200.138	1.9481e-45	3.22259e-43	chr6 148550897 148551552	0.283612	0.217066	0.430332	0.400575	8.31314	5.59356	6.69557	5	4	9	17	366	218	119	126272	chr6	148550898	148551552	+	Intergenic	Intergenic	58508	ENSMUST00000024796.6	ENSMUST00000024796	ENSMUST00000024796	ENSMUSG00000070995	Gm6313	predicted gene 6313 [Source:MGI Symbol;Acc:MGI:3644722]	6	148508284	148515807	-1
chr4_92483847_92484819	4.31997	1.75219	200.107	1.97915e-45	3.26903e-43	chr4 92483847 92484819	0.623947	0.434132	0.239073	0.212069	5.92822	7.28703	7.76461	11	8	5	9	261	284	138	102410	chr4	92483848	92484819	+	Intergenic	Intergenic	-44218	ENSMUST00000130501.1	ENSMUST00000130501	ENSMUST00000130501	ENSMUSG00000085209	Gm12637	predicted gene 12637 [Source:MGI Symbol;Acc:MGI:3650764]	4	92416788	92436541	1
chr13_34446379_34447361	3.05991	2.67696	200.097	1.98959e-45	3.28133e-43	chr13 34446379 34447361	1.13445	1.35666	2.05603	1.41379	12.4016	13.753	11.1968	20	25	43	60	546	536	199	37446	chr13	34446380	34447361	+	Intergenic	Intergenic	-20439	ENSMUST00000222063.1	ENSMUST00000222063	ENSMUST00000222063	ENSMUSG00000114170	Gm47120	predicted gene, 47120 [Source:MGI Symbol;Acc:MGI:6095867]	13	34610213	34610414	-1
chr17_47662569_47663498	3.22184	2.63138	200.082	2.00373e-45	3.29969e-43	chr17 47662569 47663498	1.24789	1.19386	1.48225	1.29598	14.4231	12.6497	9.3963	22	22	31	55	635	493	167	65142	chr17	47662570	47663498	+	intron (ENSMUST00000145314.1, intron 1 of 1)	-intron (ENSMUST00000024779.14, intron 2 of 6)	-9686	ENSMUST00000152724.1	ENSMUST00000152724	ENSMUST00000152724	ENSMUSG00000090115	Usp49	ubiquitin specific peptidase 49 [Source:MGI Symbol;Acc:MGI:2685391]	17	47941615	47997663	1
chr6_140888481_140889138	2.89881	2.94876	199.982	2.10742e-45	3.46518e-43	chr6 140888481 140889138	2.38234	1.7908	2.15166	1.74368	17.0806	14.9846	12.3784	42	33	45	74	752	584	220	125708	chr6	140888482	140889138	+	Intergenic	Intergenic	-66799	ENSMUST00000204271.2	ENSMUST00000204271	ENSMUST00000204271	ENSMUSG00000107638	Gm30524	predicted gene, 30524 [Source:MGI Symbol;Acc:MGI:5589683]	6	140901335	140989860	1
chr19_33661229_33662151	4.59344	1.68877	199.979	2.11055e-45	3.46518e-43	chr19 33661229 33662151	0.340335	0.325599	0.143444	0.282759	7.81344	7.13307	4.83881	6	6	3	12	344	278	86	75590	chr19	33661230	33662151	+	intron (ENSMUST00000025694.6, intron 1 of 10)	-intron (ENSMUST00000025694.6, intron 1 of 10)	6773	ENSMUST00000237953.1	ENSMUST00000237953	ENSMUST00000237953	ENSMUSG00000118360	Gm19755	predicted gene, 19755 [Source:MGI Symbol;Acc:MGI:5011940]	19	33645669	33645863	-1
chr3_9639547_9640518	3.92256	1.80812	199.962	2.12888e-45	3.49006e-43	chr3 9639547 9640518	0.340335	0.651198	0.478146	0.424138	5.95094	7.62059	7.9334	6	12	10	18	262	297	141	89904	chr3	9639548	9640518	+	Intergenic	Intergenic	-16487	ENSMUST00000195844.1	ENSMUST00000195844	ENSMUST00000195844	ENSMUSG00000103876	Gm17806	predicted gene, 17806 [Source:MGI Symbol;Acc:MGI:5009992]	3	9721580	9721962	1
chr5_35790268_35791178	4.99342	1.51933	199.603	2.54939e-45	4.1732e-43	chr5 35790268 35791178	0.113445	0.379866	0.0956292	0.164943	7.10933	6.02976	4.55749	2	7	2	7	313	235	81	109742	chr5	35790269	35791178	+	intron (ENSMUST00000129347.7, intron 1 of 21)	-intron (ENSMUST00000054598.11, intron 1 of 19)	-23636	ENSMUST00000130233.7	ENSMUST00000130233	ENSMUST00000130233	ENSMUSG00000029095	Ablim2	actin-binding LIM protein 2 [Source:MGI Symbol;Acc:MGI:2385758]	5	35915224	36042317	1
chr11_33118433_33119118	4.60499	1.51302	199.553	2.61381e-45	4.27227e-43	chr11 33118433 33119118	0.170167	0.108533	0.334702	0.282759	5.81466	6.90215	4.83881	3	2	7	12	256	269	86	21274	chr11	33118434	33119118	+	intron (ENSMUST00000109363.7, intron 3 of 3)	-intron (ENSMUST00000020507.7, intron 4 of 4)	28019	ENSMUST00000109363.7	ENSMUST00000109363	ENSMUST00000109363	ENSMUSG00000057967	Fgf18	fibroblast growth factor 18 [Source:MGI Symbol;Acc:MGI:1277980]	11	33067430	33097400	-1
chr10_122415916_122416448	4.17443	1.7882	199.513	2.66711e-45	4.3529e-43	chr10 122415916 122416448	0.397057	0.325599	0.334702	0.447701	8.40399	7.21005	5.40147	7	6	7	19	370	281	96	18980	chr10	122415917	122416448	+	intron (ENSMUST00000218285.1, intron 2 of 2)	-intron (ENSMUST00000218285.1, intron 2 of 2)	29290	ENSMUST00000218971.1	ENSMUST00000218971	ENSMUST00000218971	ENSMUSG00000112774	Gm36041	predicted gene, 36041 [Source:MGI Symbol;Acc:MGI:5595200]	10	122222797	122270938	1
chr3_101448508_101449287	3.27076	2.44015	199.394	2.83259e-45	4.61611e-43	chr3 101448508 101449287	0.567224	1.1396	1.24318	1.3431	11.7202	10.3917	10.1277	10	21	26	57	516	405	180	94725	chr3	101448509	101449287	+	intron (ENSMUST00000195164.1, intron 7 of 10)	-intron (ENSMUST00000043983.10, intron 7 of 10)	-21962	ENSMUST00000196233.1	ENSMUST00000196233	ENSMUST00000196233	ENSMUSG00000106137	Gm42538	predicted gene 42538 [Source:MGI Symbol;Acc:MGI:5662675]	3	101331931	101334252	-1
chr6_56555296_56555937	3.60131	1.92827	199.265	3.02221e-45	4.91781e-43	chr6 56555296 56555937	0.510502	0.705465	0.382517	0.801149	7.49545	7.31268	8.21473	9	13	8	34	330	285	146	120782	chr6	56555297	56555937	+	intron (ENSMUST00000239143.1, intron 2 of 19)	-intron (ENSMUST00000203372.2, intron 1 of 18)	13486	ENSMUST00000203372.2	ENSMUST00000203372	ENSMUST00000203372	ENSMUSG00000004347	Pde1c	phosphodiesterase 1C [Source:MGI Symbol;Acc:MGI:108413]	6	56046789	56629472	-1
chr2_152428158_152428884	3.49582	2.63175	199.18	3.1529e-45	5.12289e-43	chr2 152428158 152428884	1.64495	1.03106	0.860663	0.966092	14.3095	13.4707	9.3963	29	19	18	41	630	525	167	87036	chr2	152428159	152428884	+	intron (ENSMUST00000153713.1, intron 2 of 10)	-intron (ENSMUST00000039961.11, intron 3 of 11)	859	ENSMUST00000128737.1	ENSMUST00000128737	ENSMUST00000128737	ENSMUSG00000032680	6820408C15Rik	RIKEN cDNA 6820408C15 gene [Source:MGI Symbol;Acc:MGI:3045333]	2	152257507	152286250	1
chr17_48794555_48795231	4.55268	1.32872	199.115	3.25842e-45	5.2865e-43	chr17 48794555 48795231	0.22689	0.1628	0.0956292	0.306322	5.29225	4.9521	5.28894	4	3	2	13	233	193	94	65184	chr17	48794556	48795231	+	Intergenic	Intergenic	-56147	ENSMUST00000209681.1	ENSMUST00000209681	ENSMUST00000209681	ENSMUSG00000110276	Gm45330	predicted gene 45330 [Source:MGI Symbol;Acc:MGI:5791166]	17	49037427	49045774	-1
chr13_60727466_60727905	4.84101	1.25474	199.059	3.35143e-45	5.42937e-43	chr13 60727466 60727905	0.22689	0.0542665	0.0956292	0.235632	4.81526	5.36264	4.55749	4	1	2	10	212	209	81	39664	chr13	60727467	60727905	+	intron (ENSMUST00000226059.1, intron 14 of 26)	-intron (ENSMUST00000044083.8, intron 14 of 26)	-26310	ENSMUST00000225952.1	ENSMUST00000225952	ENSMUST00000225952	ENSMUSG00000021559	Dapk1	death associated protein kinase 1 [Source:MGI Symbol;Acc:MGI:1916885]	13	60749761	60911005	1
chr6_147502968_147503395	4.89093	1.34778	199.049	3.36754e-45	5.44741e-43	chr6 147502968 147503395	0.22689	0.108533	0.239073	0.141379	5.24682	6.05542	4.33243	4	2	5	6	231	236	77	126222	chr6	147502969	147503395	+	intron (ENSMUST00000156106.1, intron 1 of 4)	-intron (ENSMUST00000032441.13, intron 1 of 12)	-27136	ENSMUST00000128634.2	ENSMUST00000128634	ENSMUST00000128634	ENSMUSG00000072660	Gm6288	predicted gene 6288 [Source:MGI Symbol;Acc:MGI:3646376]	6	147339860	147377544	-1
chr9_120893417_120893986	4.85905	2.09283	198.968	3.50803e-45	5.66632e-43	chr9 120893417 120893986	0.510502	0.217066	0.239073	0.282759	12.6287	7.90283	6.18918	9	4	5	12	556	308	110	150477	chr9	120893418	120893986	+	Intergenic	Intergenic	-11730	ENSMUST00000215728.1	ENSMUST00000215728	ENSMUST00000215728	ENSMUSG00000111528	Gm39460	predicted gene, 39460 [Source:MGI Symbol;Acc:MGI:5622345]	9	120708763	120711038	-1
chr15_12313091_12313673	2.70357	2.7729	198.861	3.70107e-45	5.96933e-43	chr15 12313091 12313673	1.98528	1.7908	2.2951	1.86149	13.242	12.1365	13.3349	35	33	48	79	583	473	237	50257	chr15	12313092	12313673	+	Intergenic	Intergenic	-8068	ENSMUST00000059680.6	ENSMUST00000059680	ENSMUST00000059680	ENSMUSG00000022200	Golph3	golgi phosphoprotein 3 [Source:MGI Symbol;Acc:MGI:1913879]	15	12321536	12351677	1
chr5_112138198_112138713	5.77443	1.86358	198.844	3.7329e-45	6.01183e-43	chr5 112138198 112138713	0.113445	0.217066	0.239073	0.0471264	8.99455	9.44234	4.44496	2	4	5	2	396	368	79	114100	chr5	112138199	112138713	+	Intergenic	Intergenic	-17781	ENSMUST00000197688.1	ENSMUST00000197688	ENSMUST00000197688	ENSMUSG00000104538	1700016B01Rik	RIKEN cDNA 1700016B01 gene [Source:MGI Symbol;Acc:MGI:1922890]	5	112304103	112313110	1
chr10_17742068_17742843	4.63752	1.68154	198.681	4.05147e-45	6.51532e-43	chr10 17742068 17742843	0.453779	0.1628	0.286888	0.212069	7.08661	5.10605	8.1022	8	3	6	9	312	199	144	11976	chr10	17742069	17742843	+	Intergenic	Intergenic	19214	ENSMUST00000218370.1	ENSMUST00000218370	ENSMUST00000218370	ENSMUSG00000039910	Cited2	Cbp/p300-interacting transactivator, with Glu/Asp-rich carboxy-terminal domain, 2 [Source:MGI Symbol;Acc:MGI:1306784]	10	17598966	17601422	1
chr5_128673696_128674513	3.68291	2.28016	198.649	4.11766e-45	6.61207e-43	chr5 128673696 128674513	0.794114	0.651198	0.717219	0.848276	7.94972	12.547	9.05871	14	12	15	36	350	489	161	115781	chr5	128673697	128674513	+	Intergenic	Intergenic	-28419	ENSMUST00000200192.4	ENSMUST00000200192	ENSMUST00000200192	ENSMUSG00000029423	Piwil1	piwi-like RNA-mediated gene silencing 1 [Source:MGI Symbol;Acc:MGI:1928897]	5	128779588	128832538	1
chr14_36055780_36056159	5.08835	1.53445	198.595	4.22992e-45	6.78241e-43	chr14 36055780 36056159	0.283612	0.0542665	0.0478146	0.259195	4.65627	6.87649	6.97689	5	1	1	11	205	268	124	45077	chr14	36055781	36056159	+	Intergenic	Intergenic	5410	ENSMUST00000227394.1	ENSMUST00000227394	ENSMUST00000227394	ENSMUSG00000115295	Gm19129	predicted gene, 19129 [Source:MGI Symbol;Acc:MGI:5011314]	14	35772517	35773177	1
chr14_71841275_71841673	3.72254	1.8318	198.562	4.30244e-45	6.88861e-43	chr14 71841275 71841673	0.510502	0.813998	0.525961	0.400575	7.63174	6.82517	6.92063	9	15	11	17	336	266	123	47225	chr14	71841276	71841673	+	Intergenic	Intergenic	-15228	ENSMUST00000228500.1	ENSMUST00000228500	ENSMUST00000228500	ENSMUSG00000115304	4930434J06Rik	RIKEN cDNA 4930434J06 gene [Source:MGI Symbol;Acc:MGI:1921917]	14	72094142	72157879	1
chr11_5059788_5060263	2.85323	3.13395	198.551	4.32596e-45	6.91617e-43	chr11 5059788 5060263	2.72268	2.60479	2.53418	1.69655	17.1487	18.3715	14.9666	48	48	53	72	755	716	266	19767	chr11	5059789	5060263	+	TTS (ENSMUST00000056649.12)	#NAME?	1060	ENSMUST00000126974.1	ENSMUST00000126974	ENSMUST00000126974	ENSMUSG00000034209	Rasl10a	RAS-like, family 10, member A [Source:MGI Symbol;Acc:MGI:1922918]	11	5008128	5010385	1
chr4_115822034_115823013	2.38562	3.2698	198.539	4.35092e-45	6.94596e-43	chr4 115822034 115823013	3.34662	3.31026	3.34702	3.44023	18.7841	17.3195	16.6545	59	61	70	146	827	675	296	103804	chr4	115822035	115823013	+	intron (ENSMUST00000137401.2, intron 6 of 6)	-intron (ENSMUST00000137401.2, intron 6 of 6)	-5568	ENSMUST00000030477.3	ENSMUST00000030477	ENSMUST00000030477	ENSMUSG00000028709	Mob3c	MOB kinase activator 3C [Source:MGI Symbol;Acc:MGI:2140623]	4	115685289	115693382	1
chr5_8007283_8008027	4.10436	1.82408	198.522	4.38968e-45	6.99764e-43	chr5 8007283 8008027	0.567224	0.379866	0.0956292	0.565517	6.76862	7.08176	8.15846	10	7	2	24	298	276	145	108010	chr5	8007284	8008027	+	Intergenic	Intergenic	-38423	ENSMUST00000088786.10	ENSMUST00000088786	ENSMUST00000088786	ENSMUSG00000003161	Sri	sorcin [Source:MGI Symbol;Acc:MGI:98419]	5	8096078	8119379	1
chr9_42195393_42196992	3.61691	2.57039	198.511	4.4124e-45	7.02366e-43	chr9 42195393 42196992	1.24789	1.4652	0.430332	0.871839	13.4464	12.2135	10.3528	22	27	9	37	592	476	184	144552	chr9	42195394	42196992	+	intron (ENSMUST00000216586.1, intron 3 of 6)	-intron (ENSMUST00000213343.1, intron 2 of 4)	13020	ENSMUST00000216643.1	ENSMUST00000216643	ENSMUST00000216643	ENSMUSG00000111767	4930546K05Rik	RIKEN cDNA 4930546K05 gene [Source:MGI Symbol;Acc:MGI:1925444]	9	42087888	42120527	-1
chr1_64673811_64674397	5.42733	1.27511	198.427	4.60337e-45	7.30788e-43	chr1 64673811 64674397	0.283612	0.0542665	0.0956292	0.0706896	6.0645	4.46459	4.50122	5	1	2	3	267	174	80	3127	chr1	64673812	64674397	+	Intergenic	Intergenic	-16351	ENSMUST00000114077.7	ENSMUST00000114077	ENSMUST00000114077	ENSMUSG00000070871	Ccnyl1	cyclin Y-like 1 [Source:MGI Symbol;Acc:MGI:2138614]	1	64729614	64764803	1
chr11_49636547_49637086	3.36118	2.03236	198.427	4.60428e-45	7.30788e-43	chr11 49636547 49637086	0.794114	0.976797	0.525961	0.824713	8.38128	8.18508	7.59581	14	18	11	35	369	319	135	22018	chr11	49636548	49637086	+	intron (ENSMUST00000020617.2, intron 19 of 29)	-intron (ENSMUST00000020617.2, intron 19 of 29)	-26793	ENSMUST00000043873.9	ENSMUST00000043873	ENSMUST00000043873	ENSMUSG00000064057	Scgb3a1	secretoglobin, family 3A, member 1 [Source:MGI Symbol;Acc:MGI:1915912]	11	49554437	49555945	1
chr10_73812300_73812957	4.72388	1.29768	198.322	4.85362e-45	7.69249e-43	chr10 73812300 73812957	0.113445	0.217066	0.0956292	0.259195	5.49667	5.10605	4.50122	2	4	2	11	242	199	80	15413	chr10	73812301	73812957	+	intron (ENSMUST00000123398.8, intron 3 of 13)	-intron (ENSMUST00000123398.8, intron 3 of 13)	-9238	ENSMUST00000064562.13	ENSMUST00000064562	ENSMUST00000064562	NA	NA	NA	NA	NA	NA	NA
chrX_87150443_87151307	4.75384	1.52523	198.18	5.21155e-45	8.24787e-43	chrX 87150443 87151307	0.340335	0.325599	0.191258	0.117816	4.86069	6.44029	6.8081	6	6	4	5	214	251	121	152630	chrX	87150444	87151307	+	intron (ENSMUST00000113966.7, intron 5 of 10)	-intron (ENSMUST00000078875.7, intron 4 of 9)	358401	ENSMUST00000122089.1	ENSMUST00000122089	ENSMUST00000122089	ENSMUSG00000083779	Gm14775	predicted gene 14775 [Source:MGI Symbol;Acc:MGI:3705335]	X	85836080	85836389	1
chr3_79379502_79380798	2.98484	3.45767	198.085	5.46715e-45	8.63991e-43	chr3 79379502 79380798	2.66595	2.55053	1.81696	3.6523	19.0793	21.3222	24.6442	47	47	38	155	840	831	438	93066	chr3	79379503	79380798	+	intron (ENSMUST00000199658.1, intron 1 of 3)	-intron (ENSMUST00000164216.5, intron 1 of 4)	34771	ENSMUST00000199658.1	ENSMUST00000199658	ENSMUST00000199658	ENSMUSG00000091685	Spmip2	sperm microtubule inner protein 2 [Source:MGI Symbol;Acc:MGI:4936993]	3	79243968	79371436	1
chr2_92657188_92657693	4.65246	1.43427	198.059	5.53982e-45	8.74215e-43	chr2 92657188 92657693	0.283612	0.0542665	0.191258	0.282759	5.97365	6.0041	4.61375	5	1	4	12	263	234	82	83342	chr2	92657189	92657693	+	Intergenic	Intergenic	57734	ENSMUST00000065797.6	ENSMUST00000065797	ENSMUST00000065797	ENSMUSG00000027221	Chst1	carbohydrate sulfotransferase 1 [Source:MGI Symbol;Acc:MGI:1924219]	2	92430052	92445595	1
chr18_44311114_44311871	3.95585	1.73128	198.047	5.57132e-45	8.77923e-43	chr18 44311114 44311871	0.170167	0.488399	0.430332	0.541954	6.0645	7.44098	6.8081	3	9	9	23	267	290	121	70576	chr18	44311115	44311871	+	Intergenic	Intergenic	-4214	ENSMUST00000236086.1	ENSMUST00000236086	ENSMUST00000236086	ENSMUSG00000117919	Gm41717	predicted gene, 41717 [Source:MGI Symbol;Acc:MGI:5624602]	18	44448719	44462339	1
chr15_68975171_68975459	3.8472	1.67255	198.033	5.61282e-45	8.83194e-43	chr15 68975171 68975459	0.623947	0.434132	0.430332	0.353448	6.65506	6.6199	5.85159	11	8	9	15	293	258	104	52891	chr15	68975172	68975459	+	intron (ENSMUST00000230699.1, intron 1 of 1)	-intron (ENSMUST00000022954.6, intron 1 of 8)	15784	ENSMUST00000230699.1	ENSMUST00000230699	ENSMUST00000230699	ENSMUSG00000116092	Gm49422	predicted gene, 49422 [Source:MGI Symbol;Acc:MGI:6155056]	15	68831380	68866293	1
chr5_107094267_107094854	3.49851	2.13798	197.821	6.24278e-45	9.80912e-43	chr5 107094267 107094854	0.794114	0.542665	0.717219	0.942529	10.2438	8.28771	7.76461	14	10	15	40	451	323	138	113707	chr5	107094268	107094854	+	Intergenic	Intergenic	38362	ENSMUST00000136882.1	ENSMUST00000136882	ENSMUST00000136882	ENSMUSG00000029287	Tgfbr3	transforming growth factor, beta receptor III [Source:MGI Symbol;Acc:MGI:104637]	5	107254436	107437495	-1
chr15_77057565_77059013	3.30159	3.04067	197.695	6.64967e-45	1.04335e-42	chr15 77057565 77059013	2.15545	1.51946	1.09974	1.86149	20.1696	16.4215	12.6034	38	28	23	79	888	640	224	53514	chr15	77057566	77059013	+	Intergenic	Intergenic	5538	ENSMUST00000139304.1	ENSMUST00000139304	ENSMUST00000139304	ENSMUSG00000033576	Apol6	apolipoprotein L 6 [Source:MGI Symbol;Acc:MGI:1919189]	15	76928929	76941306	1
chr19_15674481_15675237	2.63924	3.41967	197.435	7.58002e-45	1.18763e-42	chr19 15674481 15675237	3.2899	3.47306	3.63391	2.70977	17.8528	19.2439	23.7439	58	64	76	115	786	750	422	74257	chr19	15674482	15675237	+	Intergenic	Intergenic	-5145	ENSMUST00000083389.1	ENSMUST00000083389	ENSMUST00000083389	ENSMUSG00000118757	Gm24319	predicted gene, 24319 [Source:MGI Symbol;Acc:MGI:5454096]	19	15657368	15657474	1
chr9_78067684_78068376	4.82198	1.36234	197.39	7.75217e-45	1.21287e-42	chr9 78067684 78068376	0.283612	0.217066	0.191258	0.117816	4.95154	4.82381	6.41424	5	4	4	5	218	188	114	147677	chr9	78067685	78068376	+	promoter-TSS (ENSMUST00000217247.1)	#NAME?	-821	ENSMUST00000217247.1	ENSMUST00000217247	ENSMUST00000217247	ENSMUSG00000111596	Gm8058	predicted gene 8058 [Source:MGI Symbol;Acc:MGI:3646565]	9	77976133	77976719	1
chr13_113251927_113253143	3.24666	3.00927	197.326	8.00463e-45	1.25058e-42	chr13 113251927 113253143	1.19117	1.89933	2.58199	1.20172	15.5815	16.7037	15.8668	21	35	54	51	686	651	282	42583	chr13	113251928	113253143	+	Intergenic	Intergenic	-26627	ENSMUST00000122399.7	ENSMUST00000122399	ENSMUST00000122399	ENSMUSG00000042385	Gzmk	granzyme K [Source:MGI Symbol;Acc:MGI:1298232]	13	113308142	113362442	-1
chr9_85689029_85691103	2.8409	3.27558	197.308	8.0777e-45	1.2602e-42	chr9 85689029 85691103	2.94957	1.68226	2.58199	3.06322	19.6018	20.2446	16.0919	52	31	54	130	863	789	286	148122	chr9	85689030	85691103	+	intron (ENSMUST00000187521.6, intron 27 of 27)	-intron (ENSMUST00000039213.14, intron 28 of 28)	28472	ENSMUST00000188768.1	ENSMUST00000188768	ENSMUST00000188768	ENSMUSG00000035941	Ibtk	inhibitor of Bruton agammaglobulinemia tyrosine kinase [Source:MGI Symbol;Acc:MGI:1918677]	9	85569413	85631387	-1
chr4_79806686_79807646	3.32992	2.86643	197.1	8.96775e-45	1.39707e-42	chr4 79806686 79807646	1.30462	1.73653	0.956292	1.74368	11.9019	14.0865	18.3425	23	32	20	74	524	549	326	101800	chr4	79806687	79807646	+	Intergenic	Intergenic	-67185	ENSMUST00000118621.1	ENSMUST00000118621	ENSMUST00000118621	ENSMUSG00000084248	Gm11409	predicted gene 11409 [Source:MGI Symbol;Acc:MGI:3652024]	4	79792588	79792990	1
chr1_72239153_72239463	4.61792	1.65149	197.012	9.37408e-45	1.4583e-42	chr1 72239153 72239463	0.453779	0.0542665	0.239073	0.282759	7.51817	6.85083	4.95134	8	1	5	12	331	267	88	3483	chr1	72239154	72239463	+	Intergenic	Intergenic	2362	ENSMUST00000101806.2	ENSMUST00000101806	ENSMUST00000101806	ENSMUSG00000119668	Gm23472	predicted gene, 23472 [Source:MGI Symbol;Acc:MGI:5453249]	1	72276105	72276295	1
chr8_26999066_26999809	4.22906	1.51445	196.884	9.99694e-45	1.553e-42	chr8 26999066 26999809	0.283612	0.271333	0.478146	0.235632	5.40581	6.41464	5.62653	5	5	10	10	238	250	100	136274	chr8	26999067	26999809	+	TTS (ENSMUST00000211274.1)	#NAME?	3188	ENSMUST00000211274.1	ENSMUST00000211274	ENSMUST00000211274	ENSMUSG00000109621	Gm45370	predicted gene 45370 [Source:MGI Symbol;Acc:MGI:5791206]	8	27486278	27488982	1
chr13_109926019_109927023	3.05805	2.5278	196.817	1.03388e-44	1.60383e-42	chr13 109926019 109927023	1.41806	1.1396	1.43444	1.36667	13.2193	10.1095	10.2403	25	21	30	58	582	394	182	42328	chr13	109926020	109927023	+	promoter-TSS (ENSMUST00000117420.7)	#NAME?	-323	ENSMUST00000117420.7	ENSMUST00000117420	ENSMUST00000117420	ENSMUSG00000021699	Pde4d	phosphodiesterase 4D, cAMP specific [Source:MGI Symbol;Acc:MGI:99555]	13	108586482	110089995	1
chr16_27342870_27343664	3.77819	1.85309	196.803	1.04099e-44	1.61258e-42	chr16 27342870 27343664	0.340335	0.379866	0.669405	0.636207	6.65506	7.00478	8.49606	6	7	14	27	293	273	151	57814	chr16	27342871	27343664	+	exon (ENSMUST00000160623.1, exon 1 of 1)	-exon (ENSMUST00000160623.1, exon 1 of 1)	677	ENSMUST00000160623.1	ENSMUST00000160623	ENSMUST00000160623	ENSMUSG00000089705	Gm15970	predicted gene 15970 [Source:MGI Symbol;Acc:MGI:3801995]	16	27161861	27162694	-1
chr16_48356527_48357423	2.93536	2.53276	196.743	1.07311e-44	1.65999e-42	chr16 48356527 48357423	1.47478	1.24813	1.19537	1.76724	11.1978	10.674	11.7032	26	23	25	75	493	416	208	59443	chr16	48356528	48357423	+	Intergenic	Intergenic	-11667	ENSMUST00000231810.1	ENSMUST00000231810	ENSMUST00000231810	ENSMUSG00000116889	Gm49771	predicted gene, 49771 [Source:MGI Symbol;Acc:MGI:6215284]	16	48189005	48189115	1
chr3_57905765_57906634	3.68291	2.01366	196.715	1.08838e-44	1.67941e-42	chr3 57905765 57906634	0.22689	0.922531	0.573775	0.73046	7.5636	8.44166	8.55232	4	17	12	31	333	329	152	92116	chr3	57905766	57906634	+	Intergenic	Intergenic	15987	ENSMUST00000157945.1	ENSMUST00000157945	ENSMUST00000157945	NA	NA	NA	NA	NA	NA	NA
chr14_72450447_72451746	3.48926	1.89366	196.714	1.08873e-44	1.67941e-42	chr14 72450447 72451746	0.964281	0.542665	0.573775	0.58908	7.54088	7.46664	7.03316	17	10	12	25	332	291	125	47254	chr14	72450448	72451746	+	intron (ENSMUST00000208955.1, intron 37 of 54)	-intron (ENSMUST00000208955.1, intron 37 of 54)	40741	ENSMUST00000208955.1	ENSMUST00000208955	ENSMUST00000208955	ENSMUSG00000109446	Gm9195	predicted gene 9195 [Source:MGI Symbol;Acc:MGI:3779838]	14	72663453	72729278	-1
chr9_108287661_108288105	4.22464	1.95604	196.698	1.09767e-44	1.69082e-42	chr9 108287661 108288105	0.340335	0.651198	0.430332	0.329885	8.72198	9.28839	5.68279	6	12	9	14	384	362	101	149578	chr9	108287662	108288105	+	Intergenic	Intergenic	-2546	ENSMUST00000035227.7	ENSMUST00000035227	ENSMUST00000035227	ENSMUSG00000032606	Nicn1	nicolin 1 [Source:MGI Symbol;Acc:MGI:1913507]	9	108167628	108173697	1
chr3_85060070_85060664	3.11695	2.23418	196.686	1.10418e-44	1.69847e-42	chr3 85060070 85060664	0.850836	1.08533	1.29099	0.989655	9.49424	8.59561	9.3963	15	20	27	42	418	335	167	93452	chr3	85060071	85060664	+	intron (ENSMUST00000154148.7, intron 3 of 9)	-intron (ENSMUST00000154148.7, intron 3 of 9)	92329	ENSMUST00000194445.1	ENSMUST00000194445	ENSMUST00000194445	ENSMUSG00000104290	Gm38041	predicted gene, 38041 [Source:MGI Symbol;Acc:MGI:5611269]	3	85059343	85060003	-1
chr18_81838853_81839606	3.79401	2.08047	196.478	1.22581e-44	1.88293e-42	chr18 81838853 81839606	0.794114	0.596932	0.430332	0.636207	9.74409	9.31405	6.41424	14	11	9	27	429	363	114	72989	chr18	81838854	81839606	+	Intergenic	Intergenic	10786	ENSMUST00000237663.1	ENSMUST00000237663	ENSMUST00000237663	ENSMUSG00000117892	Gm30454	predicted gene, 30454 [Source:MGI Symbol;Acc:MGI:5589613]	18	81887567	81893231	-1
chr12_35894059_35894823	3.77843	2.60666	196.36	1.30069e-44	1.99514e-42	chr12 35894059 35894823	0.794114	0.813998	0.860663	1.10747	11.9019	9.13444	17.1609	14	15	18	47	524	356	305	30549	chr12	35894060	35894823	+	Intergenic	Intergenic	-31179	ENSMUST00000042101.4	ENSMUST00000042101	ENSMUST00000042101	ENSMUSG00000036231	Agr3	anterior gradient 3 [Source:MGI Symbol;Acc:MGI:2685734]	12	35975619	35999735	1
chr14_65624167_65626300	5.02365	2.92322	196.327	1.32238e-44	2.02558e-42	chr14 65624167 65626300	0.170167	0.976797	0.191258	0.612644	19.9197	19.2696	9.73389	3	18	4	26	877	751	173	46792	chr14	65624168	65626300	+	intron (ENSMUST00000150897.7, intron 12 of 18)	-intron (ENSMUST00000079469.6, intron 12 of 18)	19967	ENSMUST00000079469.6	ENSMUST00000079469	ENSMUST00000079469	ENSMUSG00000061356	Nuggc	nuclear GTPase, germinal center associated [Source:MGI Symbol;Acc:MGI:2685446]	14	65835995	65885980	1
chr1_50025430_50026548	3.3881	2.38369	196.246	1.3777e-44	2.10738e-42	chr1 50025430 50026548	1.47478	0.868264	0.908478	0.824713	8.7447	11.4181	11.1405	26	16	19	35	385	445	198	2175	chr1	50025431	50026548	+	Intergenic	Intergenic	-30793	ENSMUST00000190905.1	ENSMUST00000190905	ENSMUST00000190905	ENSMUSG00000101760	Gm8384	predicted gene 8384 [Source:MGI Symbol;Acc:MGI:3648814]	1	50095941	50097649	1
chr15_102920223_102921862	3.24912	3.22804	196.182	1.42233e-44	2.17261e-42	chr15 102920223 102921862	1.81512	1.628	1.81696	2.45057	23.6902	18.7821	13.5037	32	30	38	104	1043	732	240	56050	chr15	102920224	102921862	+	promoter-TSS (ENSMUST00000001700.6)	#NAME?	-60	ENSMUST00000001700.6	ENSMUST00000001700	ENSMUST00000001700	ENSMUSG00000001655	Hoxc13	homeobox C13 [Source:MGI Symbol;Acc:MGI:99560]	15	102829538	102837249	1
chr10_88664388_88665047	4.75041	1.2034	196.126	1.46328e-44	2.23205e-42	chr10 88664388 88665047	0.113445	0.325599	0.0956292	0.164943	4.56541	4.90078	4.72628	2	6	2	7	201	191	84	16788	chr10	88664389	88665047	+	Intergenic	Intergenic	-6488	ENSMUST00000219185.1	ENSMUST00000219185	ENSMUST00000219185	ENSMUSG00000112428	Gm48106	predicted gene, 48106 [Source:MGI Symbol;Acc:MGI:6097458]	10	88485968	88494092	-1
chr6_127397955_127398600	3.91253	1.83663	195.994	1.56308e-44	2.38098e-42	chr6 127397955 127398600	0.794114	0.1628	0.382517	0.541954	7.5636	7.54361	6.58304	14	3	8	23	333	294	117	124898	chr6	127397956	127398600	+	Intergenic	Intergenic	-12852	ENSMUST00000200875.1	ENSMUST00000200875	ENSMUST00000200875	ENSMUSG00000106883	Gm34091	predicted gene, 34091 [Source:MGI Symbol;Acc:MGI:5593250]	6	127388093	127388696	1
chrX_140255649_140256143	4.46723	1.40471	195.888	1.64928e-44	2.5088e-42	chrX 140255649 140256143	0.22689	0.379866	0.0956292	0.259195	5.95094	5.33698	4.89508	4	7	2	11	262	208	87	153643	chrX	140255650	140256143	+	intron (ENSMUST00000130153.1, intron 1 of 1)	-intron (ENSMUST00000130153.1, intron 1 of 1)	21966	ENSMUST00000130153.1	ENSMUST00000130153	ENSMUST00000130153	ENSMUSG00000086441	Gm15046	predicted gene 15046 [Source:MGI Symbol;Acc:MGI:3705253]	X	139079447	139178611	-1
chr2_18412429_18413071	4.46041	1.46292	195.869	1.66484e-44	2.52897e-42	chr2 18412429 18413071	0.340335	0.271333	0.239073	0.212069	4.92883	5.54225	6.75183	6	5	5	9	217	216	120	78661	chr2	18412430	18413071	+	Intergenic	Intergenic	-19920	ENSMUST00000166495.7	ENSMUST00000166495	ENSMUST00000166495	ENSMUSG00000026740	Dnajc1	DnaJ heat shock protein family (Hsp40) member C1 [Source:MGI Symbol;Acc:MGI:103268]	2	18200465	18397641	-1
chr19_37018358_37018911	3.2518	2.1652	195.795	1.72781e-44	2.62099e-42	chr19 37018358 37018911	0.907559	0.976797	1.19537	0.706896	9.01726	8.62127	8.72112	16	18	25	30	397	336	155	75804	chr19	37018359	37018911	+	Intergenic	Intergenic	57320	ENSMUST00000236343.1	ENSMUST00000236343	ENSMUST00000236343	ENSMUSG00000040565	Btaf1	B-TFIID TATA-box binding protein associated factor 1 [Source:MGI Symbol;Acc:MGI:2147538]	19	36903479	36990152	1
chr8_125723369_125724071	5.03771	1.69116	195.762	1.75697e-44	2.66154e-42	chr8 125723369 125724071	0.283612	0.108533	0.191258	0.212069	8.38128	7.21005	4.38869	5	2	4	9	369	281	78	142373	chr8	125723370	125724071	+	Intergenic	Intergenic	-6243	ENSMUST00000146055.7	ENSMUST00000146055	ENSMUST00000146055	ENSMUSG00000031851	Ntpcr	nucleoside-triphosphatase, cancer-related [Source:MGI Symbol;Acc:MGI:1913816]	8	126456702	126474974	1
chr1_35765701_35766129	4.55554	1.4682	195.676	1.83424e-44	2.77477e-42	chr1 35765701 35766129	0.340335	0.0542665	0.286888	0.259195	5.8828	4.84946	6.58304	6	1	6	11	259	189	117	1332	chr1	35765702	35766129	+	Intergenic	Intergenic	4313	ENSMUST00000082667.1	ENSMUST00000082667	ENSMUST00000082667	ENSMUSG00000064601	Gm25634	predicted gene, 25634 [Source:MGI Symbol;Acc:MGI:5455411]	1	35800683	35800787	1
chr12_31427245_31427978	3.68886	2.04074	195.447	2.05816e-44	3.10921e-42	chr12 31427245 31427978	0.794114	0.759731	0.717219	0.424138	7.45003	9.57064	7.76461	14	14	15	18	328	373	138	30259	chr12	31427246	31427978	+	intron (ENSMUST00000167432.7, intron 1 of 6)	-intron (ENSMUST00000167432.7, intron 1 of 6)	8764	ENSMUST00000163721.1	ENSMUST00000163721	ENSMUST00000163721	ENSMUSG00000091040	Gm9359	predicted gene 9359 [Source:MGI Symbol;Acc:MGI:3648512]	12	31468847	31470067	1
chr8_26419940_26420438	3.58042	2.38561	195.302	2.21368e-44	3.33497e-42	chr8 26419940 26420438	1.19117	0.651198	0.430332	1.1546	9.56238	10.7766	11.5906	21	12	9	49	421	420	206	136233	chr8	26419941	26420438	+	Intergenic	Intergenic	15524	ENSMUST00000209232.1	ENSMUST00000209232	ENSMUST00000209232	ENSMUSG00000109996	Gm31898	predicted gene, 31898 [Source:MGI Symbol;Acc:MGI:5591057]	8	26918309	26925741	-1
chr12_73316169_73316807	2.75564	2.7333	195.305	2.21065e-44	3.33497e-42	chr12 73316169 73316807	2.04201	1.73653	2.19947	1.57874	12.288	13.0345	12.4346	36	32	46	67	541	508	221	32278	chr12	73316170	73316807	+	intron (ENSMUST00000058139.13, intron 6 of 7)	-intron (ENSMUST00000058139.13, intron 6 of 7)	-2141	ENSMUST00000134247.1	ENSMUST00000134247	ENSMUST00000134247	ENSMUSG00000044712	Slc38a6	solute carrier family 38, member 6 [Source:MGI Symbol;Acc:MGI:3648156]	12	73333553	73400823	1
chr12_100070874_100071426	5.11449	1.50697	195.277	2.24215e-44	3.37322e-42	chr12 100070874 100071426	0.0567224	0.108533	0.191258	0.235632	7.01847	6.38898	4.16363	1	2	4	10	309	249	74	34071	chr12	100070875	100071426	+	Intergenic	Intergenic	9667	ENSMUST00000221663.1	ENSMUST00000221663	ENSMUST00000221663	ENSMUSG00000112999	9530050K03Rik	RIKEN cDNA 9530050K03 gene [Source:MGI Symbol;Acc:MGI:1925871]	12	100045778	100047076	-1
chr18_58644274_58644763	3.23001	2.52988	194.975	2.60896e-44	3.91475e-42	chr18 58644274 58644763	1.13445	1.19386	1.43444	1.13103	10.4028	9.85288	14.3476	20	22	30	48	458	384	255	71421	chr18	58644275	58644763	+	Intergenic	Intergenic	-14947	ENSMUST00000025503.9	ENSMUST00000025503	ENSMUST00000025503	ENSMUSG00000024601	Isoc1	isochorismatase domain containing 1 [Source:MGI Symbol;Acc:MGI:1913557]	18	58792538	58813440	1
chr7_142409588_142410488	3.86451	2.31986	194.975	2.60924e-44	3.91475e-42	chr7 142409588 142410488	0.964281	0.488399	0.765034	0.612644	12.0154	11.2128	7.08942	17	9	16	26	529	437	126	134677	chr7	142409589	142410488	+	Intergenic	Intergenic	-14757	ENSMUST00000104480.1	ENSMUST00000104480	ENSMUST00000104480	ENSMUSG00000077668	Gm26143	predicted gene, 26143 [Source:MGI Symbol;Acc:MGI:5455920]	7	141978532	141978639	1
chr2_84481815_84482613	3.68554	2.09919	194.897	2.71292e-44	4.06475e-42	chr2 84481815 84482613	0.794114	0.271333	0.669405	0.848276	7.58631	8.77522	9.90269	14	5	14	36	334	342	176	82957	chr2	84481816	84482613	+	Intergenic	Intergenic	-5439	ENSMUST00000090732.9	ENSMUST00000090732	ENSMUST00000090732	ENSMUSG00000027082	Tfpi	tissue factor pathway inhibitor [Source:MGI Symbol;Acc:MGI:1095418]	2	84263199	84307119	-1
chr1_25075953_25076526	3.69789	1.82163	194.826	2.81199e-44	4.20743e-42	chr1 25075953 25076526	0.623947	0.651198	0.382517	0.541954	6.42792	6.79951	8.271	11	12	8	23	283	265	147	980	chr1	25075954	25076526	+	intron (ENSMUST00000153568.7, intron 8 of 9)	-intron (ENSMUST00000041838.6, intron 28 of 29)	-49008	ENSMUST00000185379.1	ENSMUST00000185379	ENSMUST00000185379	ENSMUSG00000099392	Gm29414	predicted gene 29414 [Source:MGI Symbol;Acc:MGI:5580120]	1	25065662	25066313	-1
chr3_82952060_82952573	3.86891	2.4604	194.427	3.43563e-44	5.13355e-42	chr3 82952060 82952573	0.907559	1.03106	0.430332	0.777586	10.1756	9.05747	15.3042	16	19	9	33	448	353	272	93246	chr3	82952061	82952573	+	intron (ENSMUST00000194580.1, intron 2 of 2)	-intron (ENSMUST00000193581.1, intron 3 of 3)	43268	ENSMUST00000194580.1	ENSMUST00000194580	ENSMUST00000194580	ENSMUSG00000102595	Gm30097	predicted gene, 30097 [Source:MGI Symbol;Acc:MGI:5589256]	3	82833972	82915795	-1
chr16_35855950_35856716	3.61951	1.79268	194.395	3.4923e-44	5.21113e-42	chr16 35855950 35856716	0.623947	0.759731	0.382517	0.518391	7.15475	6.41464	7.20196	11	14	8	22	315	250	128	58586	chr16	35855951	35856716	+	TTS (ENSMUST00000142946.7)	#NAME?	11618	ENSMUST00000231830.1	ENSMUST00000231830	ENSMUST00000231830	ENSMUSG00000116639	Gm49730	predicted gene, 49730 [Source:MGI Symbol;Acc:MGI:6215212]	16	35686549	35688321	-1
chr5_77399961_77400644	3.09994	2.42766	194.38	3.51888e-44	5.24365e-42	chr5 77399961 77400644	1.07773	1.73653	1.19537	0.989655	10.1529	10.3661	10.9717	19	32	25	42	447	404	195	112044	chr5	77399962	77400644	+	intron (ENSMUST00000046746.9, intron 1 of 4)	-intron (ENSMUST00000046746.9, intron 1 of 4)	7737	ENSMUST00000163898.5	ENSMUST00000163898	ENSMUST00000163898	ENSMUSG00000036256	Igfbp7	insulin-like growth factor binding protein 7 [Source:MGI Symbol;Acc:MGI:1352480]	5	77497087	77555888	-1
chr9_26518586_26519935	2.96566	3.1633	194.204	3.84412e-44	5.72054e-42	chr9 26518586 26519935	1.92856	1.7908	2.24729	2.80402	16.808	14.7023	21.3808	34	33	47	119	740	573	380	143570	chr9	26518587	26519935	+	TTS (ENSMUST00000216806.1)	#NAME?	30692	ENSMUST00000216806.1	ENSMUST00000216806	ENSMUST00000216806	ENSMUSG00000111066	Gm30313	predicted gene, 30313 [Source:MGI Symbol;Acc:MGI:5589472]	9	26430781	26461249	-1
chr7_40325117_40325859	3.29705	2.41698	194.052	4.14867e-44	6.16538e-42	chr7 40325117 40325859	1.58823	0.651198	0.956292	1.10747	9.44882	11.5207	10.8592	28	12	20	47	416	449	193	128084	chr7	40325118	40325859	+	Intergenic	Intergenic	-37962	ENSMUST00000157289.1	ENSMUST00000157289	ENSMUST00000157289	NA	NA	NA	NA	NA	NA	NA
chr16_37753692_37754329	4.22284	2.20603	193.999	4.25975e-44	6.3219e-42	chr16 37753692 37754329	0.22689	0.379866	0.478146	0.777586	8.94912	12.2648	7.48328	4	7	10	33	394	478	133	58728	chr16	37753693	37754329	+	Intergenic	Intergenic	-22862	ENSMUST00000114763.2	ENSMUST00000114763	ENSMUST00000114763	ENSMUSG00000022816	Fstl1	follistatin-like 1 [Source:MGI Symbol;Acc:MGI:102793]	16	37597235	37656876	1
chrX_41062722_41063478	4.88691	1.1438	193.866	4.55523e-44	6.75129e-42	chrX 41062722 41063478	0.22689	0.0542665	0.0956292	0.188506	4.86069	4.49024	4.2199	4	1	2	8	214	175	75	151700	chrX	41062723	41063478	+	Intergenic	Intergenic	-134989	ENSMUST00000118073.1	ENSMUST00000118073	ENSMUST00000118073	ENSMUSG00000084287	Gm14576	predicted gene 14576 [Source:MGI Symbol;Acc:MGI:3705593]	X	40015878	40016988	-1
chr3_157013183_157014006	4.18212	2.07637	193.844	4.6052e-44	6.81613e-42	chr3 157013183 157014006	0.22689	0.596932	0.62159	0.471264	8.35857	6.69688	11.6469	4	11	13	20	368	261	207	98048	chr3	157013184	157014006	+	intron (ENSMUST00000175773.1, intron 2 of 2)	-intron (ENSMUST00000041425.11, intron 2 of 6)	13178	ENSMUST00000198749.1	ENSMUST00000198749	ENSMUST00000198749	ENSMUSG00000106018	Gm43527	predicted gene 43527 [Source:MGI Symbol;Acc:MGI:5663664]	3	156706054	156709231	1
chr16_91869475_91870619	3.97555	2.22541	193.812	4.68167e-44	6.91998e-42	chr16 91869475 91870619	0.907559	0.434132	0.62159	0.518391	12.5151	8.46732	7.59581	16	8	13	22	551	330	135	61259	chr16	91869476	91870619	+	intron (ENSMUST00000114002.8, intron 28 of 38)	-intron (ENSMUST00000056482.13, intron 28 of 28)	-7506	ENSMUST00000141073.1	ENSMUST00000141073	ENSMUST00000141073	ENSMUSG00000022957	Itsn1	intersectin 1 (SH3 domain protein 1A) [Source:MGI Symbol;Acc:MGI:1338069]	16	91526169	91717485	1
chr2_92837073_92837544	4.9857	1.14985	193.72	4.90119e-44	7.2347e-42	chr2 92837073 92837544	0.283612	0.0542665	0.0478146	0.164943	4.92883	4.41327	4.33243	5	1	1	7	217	172	77	83357	chr2	92837074	92837544	+	Intergenic	Intergenic	36000	ENSMUST00000121350.1	ENSMUST00000121350	ENSMUST00000121350	ENSMUSG00000082700	Gm13792	predicted gene 13792 [Source:MGI Symbol;Acc:MGI:3650955]	2	92703232	92703654	-1
chr1_90356141_90356936	3.3485	2.06451	193.7	4.9511e-44	7.29854e-42	chr1 90356141 90356936	0.964281	0.813998	0.765034	0.73046	8.97183	8.59561	6.97689	17	15	16	31	395	335	124	4839	chr1	90356142	90356936	+	Intergenic	Intergenic	29227	ENSMUST00000184315.1	ENSMUST00000184315	ENSMUST00000184315	NA	NA	NA	NA	NA	NA	NA
chr7_92685188_92686102	3.66987	1.73382	193.611	5.1785e-44	7.62351e-42	chr7 92685188 92686102	0.453779	0.379866	0.669405	0.541954	6.58691	6.18371	7.31449	8	7	14	23	290	241	130	131120	chr7	92685189	92686102	+	Intergenic	Intergenic	-15711	ENSMUST00000119954.8	ENSMUST00000119954	ENSMUST00000119954	ENSMUSG00000041328	Pcf11	PCF11 cleavage and polyadenylation factor subunit [Source:MGI Symbol;Acc:MGI:1919579]	7	92292751	92319142	-1
chr2_11557199_11557616	2.82254	2.6089	193.592	5.22874e-44	7.68716e-42	chr2 11557199 11557616	1.92856	1.41093	1.48225	1.72011	10.7889	12.6753	11.4219	34	26	31	73	475	494	203	78299	chr2	11557200	11557616	+	Intergenic	Intergenic	-3331	ENSMUST00000192949.5	ENSMUST00000192949	ENSMUST00000192949	ENSMUSG00000026773	Pfkfb3	6-phosphofructo-2-kinase/fructose-2,6-biphosphatase 3 [Source:MGI Symbol;Acc:MGI:2181202]	2	11476244	11558888	-1
chr7_105588665_105589465	3.66299	2.20615	193.46	5.58605e-44	8.20148e-42	chr7 105588665 105589465	0.340335	0.705465	0.765034	0.966092	9.26711	10.8792	7.76461	6	13	16	41	408	424	138	131976	chr7	105588666	105589465	+	Intergenic	Intergenic	-7412	ENSMUST00000191011.6	ENSMUST00000191011	ENSMUST00000191011	ENSMUSG00000037032	Apbb1	amyloid beta precursor protein binding family B member 1 [Source:MGI Symbol;Acc:MGI:107765]	7	105207690	105230860	-1
chr2_4915927_4916401	3.39414	1.96115	193.331	5.95946e-44	8.73802e-42	chr2 4915927 4916401	0.964281	0.759731	0.62159	0.636207	7.85887	8.13376	6.92063	17	14	13	27	346	317	123	77896	chr2	4915928	4916401	+	Intergenic	Intergenic	-2855	ENSMUST00000027975.7	ENSMUST00000027975	ENSMUST00000027975	ENSMUSG00000026664	Phyh	phytanoyl-CoA hydroxylase [Source:MGI Symbol;Acc:MGI:891978]	2	4923830	4943541	1
chr14_75807905_75809124	2.94513	2.60643	193.327	5.97173e-44	8.74431e-42	chr14 75807905 75809124	2.04201	1.19386	1.24318	1.6023	11.7883	12.4701	10.9155	36	22	26	68	519	486	194	47536	chr14	75807906	75809124	+	Intergenic	Intergenic	-21478	ENSMUST00000022580.7	ENSMUST00000022580	ENSMUST00000022580	ENSMUSG00000022003	Slc25a30	solute carrier family 25, member 30 [Source:MGI Symbol;Acc:MGI:1914804]	14	75997557	76024477	-1
chr17_49044191_49044824	2.6449	3.38523	193.034	6.9182e-44	1.01167e-41	chr17 49044191 49044824	3.8004	2.06213	3.5861	3.15747	18.8976	20.1933	20.1992	67	38	75	134	832	787	359	65204	chr17	49044192	49044824	+	intron (ENSMUST00000046254.2, intron 1 of 2)	-intron (ENSMUST00000046254.2, intron 1 of 2)	51925	ENSMUST00000200509.1	ENSMUST00000200509	ENSMUST00000200509	NA	NA	NA	NA	NA	NA	NA
chr6_121363316_121364502	2.61776	3.13455	193.013	6.99359e-44	1.02133e-41	chr6 121363316 121364502	2.60923	2.22493	3.29921	2.59195	18.3071	15.9596	15.0791	46	41	69	110	806	622	268	124514	chr6	121363317	121364502	+	TTS (ENSMUST00000170339.1)	#NAME?	4944	ENSMUST00000170339.1	ENSMUST00000170339	ENSMUST00000170339	ENSMUSG00000030109	Slc6a12	solute carrier family 6 (neurotransmitter transporter, betaine/GABA), member 12 [Source:MGI Symbol;Acc:MGI:95628]	6	121320035	121342734	1
chr8_84311285_84311882	3.86209	1.87855	193.003	7.02711e-44	1.02487e-41	chr8 84311285 84311882	0.397057	0.271333	0.62159	0.636207	7.5636	8.54429	6.13291	7	5	13	27	333	333	109	139297	chr8	84311286	84311882	+	Intergenic	Intergenic	-7851	ENSMUST00000210948.1	ENSMUST00000210948	ENSMUST00000210948	ENSMUSG00000109653	Gm45608	predicted gene 45608 [Source:MGI Symbol;Acc:MGI:5791444]	8	85029592	85030362	-1
chr9_95469075_95469659	3.5696	1.83158	192.908	7.37065e-44	1.07354e-41	chr9 95469075 95469659	0.397057	0.651198	0.717219	0.58908	6.83676	7.87717	6.47051	7	12	15	25	301	307	115	148519	chr9	95469076	95469659	+	intron (ENSMUST00000217176.1, intron 24 of 27)	-intron (ENSMUST00000078374.12, intron 23 of 26)	12877	ENSMUST00000186139.1	ENSMUST00000186139	ENSMUST00000186139	ENSMUSG00000032407	U2surp	U2 snRNP-associated SURP domain containing [Source:MGI Symbol;Acc:MGI:1915208]	9	95338951	95394049	-1
chr1_106223664_106224351	3.65929	2.24679	192.893	7.42822e-44	1.08049e-41	chr1 106223664 106224351	1.36134	0.705465	0.334702	0.706896	9.72138	9.62195	9.45257	24	13	7	30	428	375	168	5478	chr1	106223665	106224351	+	exon (ENSMUST00000194600.1, exon 1 of 1)	-exon (ENSMUST00000194600.1, exon 1 of 1)	4694	ENSMUST00000194600.1	ENSMUST00000194600	ENSMUST00000194600	ENSMUSG00000103291	Gm38235	predicted gene, 38235 [Source:MGI Symbol;Acc:MGI:5611463]	1	106147044	106151995	1
chr5_120677584_120677897	3.86005	2.86266	192.683	8.25303e-44	1.19888e-41	chr5 120677584 120677897	1.24789	1.03106	1.38662	0.612644	16.1266	18.3459	10.2965	22	19	29	26	710	715	183	115017	chr5	120677585	120677897	+	promoter-TSS (ENSMUST00000154759.1)	#NAME?	-852	ENSMUST00000154759.1	ENSMUST00000154759	ENSMUST00000154759	ENSMUSG00000029602	Rasal1	RAS protein activator like 1 (GAP1 like) [Source:MGI Symbol;Acc:MGI:1330842]	5	120786877	120817662	1
chr12_29221987_29222582	3.12465	2.57326	192.593	8.63754e-44	1.25307e-41	chr12 29221987 29222582	1.64495	1.628	0.956292	1.20172	10.2892	13.3938	11.2531	29	30	20	51	453	522	200	30102	chr12	29221988	29222582	+	Intergenic	Intergenic	80356	ENSMUST00000222225.1	ENSMUST00000222225	ENSMUST00000222225	ENSMUSG00000113986	Gm31333	predicted gene, 31333 [Source:MGI Symbol;Acc:MGI:5590492]	12	29189166	29249767	1
chr7_144248602_144249206	4.5124	1.43772	192.45	9.28271e-44	1.34489e-41	chr7 144248602 144249206	0.340335	0.1628	0.143444	0.282759	6.26893	5.6962	4.55749	6	3	3	12	276	222	81	134829	chr7	144248603	144249206	+	intron (ENSMUST00000213146.1, intron 13 of 17)	-intron (ENSMUST00000105900.8, intron 4 of 15)	-35535	ENSMUST00000146006.2	ENSMUST00000146006	ENSMUST00000146006	ENSMUSG00000037541	Shank2	SH3 and multiple ankyrin repeat domains 2 [Source:MGI Symbol;Acc:MGI:2671987]	7	143555665	143978231	1
chr2_11547659_11548084	3.30343	2.11426	192.261	1.02059e-43	1.4767e-41	chr2 11547659 11548084	0.680669	0.922531	0.669405	1.06034	8.01787	9.33971	8.271	12	17	14	45	353	364	147	78297	chr2	11547660	11548084	+	intron (ENSMUST00000195779.5, intron 1 of 11)	-intron (ENSMUST00000192949.5, intron 1 of 14)	6050	ENSMUST00000195779.5	ENSMUST00000195779	ENSMUST00000195779	ENSMUSG00000026773	Pfkfb3	6-phosphofructo-2-kinase/fructose-2,6-biphosphatase 3 [Source:MGI Symbol;Acc:MGI:2181202]	2	11476244	11558888	-1
chr7_79248541_79249319	4.21603	1.56603	192.203	1.05061e-43	1.517e-41	chr7 79248541 79249319	0.283612	0.434132	0.430332	0.212069	5.7238	6.87649	5.40147	5	8	9	9	252	268	96	130263	chr7	79248542	79249319	+	Intergenic	Intergenic	23881	ENSMUST00000206795.1	ENSMUST00000206795	ENSMUST00000206795	ENSMUSG00000108387	Gm31510	predicted gene, 31510 [Source:MGI Symbol;Acc:MGI:5590669]	7	78921436	78922783	-1
chr14_72379007_72379630	4.10341	1.94486	192.202	1.05122e-43	1.517e-41	chr14 72379007 72379630	0.22689	0.434132	0.430332	0.612644	7.81344	9.72459	6.02038	4	8	9	26	344	379	107	47250	chr14	72379008	72379630	+	Intergenic	Intergenic	112519	ENSMUST00000208955.1	ENSMUST00000208955	ENSMUST00000208955	ENSMUSG00000109446	Gm9195	predicted gene 9195 [Source:MGI Symbol;Acc:MGI:3779838]	14	72663453	72729278	-1
chr5_129315603_129316187	4.90413	1.63165	192.11	1.10098e-43	1.58673e-41	chr5 129315603 129316187	0.113445	0.108533	0.191258	0.329885	5.63295	8.49298	5.23267	2	2	4	14	248	331	93	115866	chr5	129315604	129316187	+	Intergenic	Intergenic	-47667	ENSMUST00000198925.1	ENSMUST00000198925	ENSMUST00000198925	ENSMUSG00000104681	Gm43001	predicted gene 43001 [Source:MGI Symbol;Acc:MGI:5663138]	5	129440626	129441785	1
chr13_113361893_113362758	3.56766	2.53863	192.052	1.13345e-43	1.63139e-41	chr13 113361893 113362758	0.510502	1.1396	1.05192	1.17816	10.8116	9.7759	15.2479	9	21	22	50	476	381	271	42595	chr13	113361894	113362758	+	intron (ENSMUST00000136755.9, intron 8 of 9)	-intron (ENSMUST00000078163.13, intron 3 of 5)	10723	ENSMUST00000135096.1	ENSMUST00000135096	ENSMUST00000135096	ENSMUSG00000021763	Cspg4b	chondroitin sulfate proteoglycan 4B [Source:MGI Symbol;Acc:MGI:3040697]	13	113429693	113516245	1
chr1_159382244_159382677	4.54448	1.37218	191.957	1.18914e-43	1.7093e-41	chr1 159382244 159382677	0.22689	0.108533	0.382517	0.188506	5.15596	5.95278	4.72628	4	2	8	8	227	232	84	8276	chr1	159382245	159382677	+	Intergenic	Intergenic	4057	ENSMUST00000194705.1	ENSMUST00000194705	ENSMUST00000194705	ENSMUSG00000103289	Gm31256	predicted gene, 31256 [Source:MGI Symbol;Acc:MGI:5590415]	1	159205974	159206479	1
chr7_78974709_78975217	4.72864	1.43838	191.929	1.20596e-43	1.73121e-41	chr7 78974709 78975217	0.22689	0.379866	0.143444	0.141379	6.42792	5.64488	4.50122	4	7	3	6	283	220	80	130246	chr7	78974710	78975217	+	Intergenic	Intergenic	-51077	ENSMUST00000206812.1	ENSMUST00000206812	ENSMUST00000206812	ENSMUSG00000108670	Gm44815	predicted gene 44815 [Source:MGI Symbol;Acc:MGI:5753391]	7	78572002	78573634	-1
chr13_83744777_83745632	2.41415	3.73169	191.914	1.21479e-43	1.74159e-41	chr13 83744777 83745632	3.97057	5.37239	3.82517	5.08965	24.5987	22.3742	26.6135	70	99	80	216	1083	872	473	40683	chr13	83744778	83745632	+	intron (ENSMUST00000187663.1, intron 1 of 2)	-intron (ENSMUST00000185281.6, intron 3 of 3)	6342	ENSMUST00000187663.1	ENSMUST00000187663	ENSMUST00000187663	ENSMUSG00000050334	Mir9-2hg	Mir9-2 host gene [Source:MGI Symbol;Acc:MGI:2443574]	13	83863381	84100589	1
chr5_104088742_104089373	4.47574	1.4253	191.797	1.28825e-43	1.8445e-41	chr5 104088742 104089373	0.453779	0.1628	0.143444	0.235632	6.13264	5.46527	4.78255	8	3	3	10	270	213	85	113487	chr5	104088743	104089373	+	intron (ENSMUST00000031249.7, intron 6 of 10)	-intron (ENSMUST00000031249.7, intron 6 of 10)	-11450	ENSMUST00000164471.7	ENSMUST00000164471	ENSMUST00000164471	ENSMUSG00000091034	Scpppq1	secretory calcium-binding phosphoprotein proline-glutamine rich 1 [Source:MGI Symbol;Acc:MGI:4937294]	5	104217930	104225474	-1
chr15_54532880_54533356	4.54891	1.31302	191.73	1.33292e-43	1.90598e-41	chr15 54532880 54533356	0.22689	0.1628	0.286888	0.188506	5.01968	5.72186	4.38869	4	3	6	8	221	223	78	51942	chr15	54532881	54533356	+	Intergenic	Intergenic	-38074	ENSMUST00000025356.3	ENSMUST00000025356	ENSMUST00000025356	ENSMUSG00000024479	Mal2	mal, T cell differentiation protein 2 [Source:MGI Symbol;Acc:MGI:2146021]	15	54434588	54466243	1
chrX_13002826_13003645	4.68521	1.3786	191.693	1.35783e-43	1.93906e-41	chrX 13002826 13003645	0.340335	0.108533	0.286888	0.141379	4.5427	5.72186	5.96412	6	2	6	6	200	223	106	151235	chrX	13002827	13003645	+	Intergenic	Intergenic	-38779	ENSMUST00000127521.1	ENSMUST00000127521	ENSMUST00000127521	ENSMUSG00000087424	5730405O15Rik	RIKEN cDNA 5730405O15 gene [Source:MGI Symbol;Acc:MGI:1917739]	X	12907989	12911536	1
chr5_64729823_64730485	4.28243	1.51868	191.622	1.407e-43	2.00666e-41	chr5 64729823 64730485	0.453779	0.434132	0.0956292	0.259195	6.04179	6.20937	5.17641	8	8	2	11	266	242	92	111054	chr5	64729824	64730485	+	intron (ENSMUST00000180912.5, intron 1 of 4)	-intron (ENSMUST00000180912.5, intron 1 of 4)	-8397	ENSMUST00000180799.2	ENSMUST00000180799	ENSMUST00000180799	ENSMUSG00000097640	Gm20033	predicted gene, 20033 [Source:MGI Symbol;Acc:MGI:5012218]	5	64865550	64961516	-1
chr4_147871988_147872223	5.05267	1.46762	191.596	1.42541e-43	2.03028e-41	chr4 147871988 147872223	0.113445	0.271333	0.0956292	0.188506	4.56541	7.41532	5.3452	2	5	2	8	201	289	95	106841	chr4	147871989	147872223	+	Intergenic	Intergenic	3127	ENSMUST00000094481.1	ENSMUST00000094481	ENSMUST00000094481	ENSMUSG00000070583	Fv1	Friend virus susceptibility 1 [Source:MGI Symbol;Acc:MGI:95595]	4	147953436	147954815	1
chr1_156784193_156784892	2.49651	3.28204	191.414	1.56186e-43	2.22175e-41	chr1 156784193 156784892	3.51679	3.20173	3.06014	3.03965	20.7147	16.755	16.4295	62	59	64	129	912	653	292	8097	chr1	156784194	156784892	+	Intergenic	Intergenic	-8969	ENSMUST00000121352.1	ENSMUST00000121352	ENSMUST00000121352	ENSMUSG00000046057	Gm15428	predicted pseudogene 15428 [Source:MGI Symbol;Acc:MGI:3642670]	1	156621082	156621414	1
chr2_14041286_14041962	4.13247	1.71745	191.406	1.56819e-43	2.22786e-41	chr2 14041286 14041962	0.283612	0.1628	0.286888	0.612644	7.26832	6.64556	6.30171	5	3	6	26	320	259	112	78415	chr2	14041287	14041962	+	intron (ENSMUST00000114753.7, intron 4 of 6)	-intron (ENSMUST00000074854.8, intron 5 of 7)	-1201	ENSMUST00000195416.1	ENSMUST00000195416	ENSMUST00000195416	ENSMUSG00000103926	Gm37894	predicted gene, 37894 [Source:MGI Symbol;Acc:MGI:5611122]	2	14042636	14045234	-1
chr17_67367820_67368330	4.29244	1.55255	191.255	1.69175e-43	2.40029e-41	chr17 67367820 67368330	0.22689	0.108533	0.573775	0.282759	6.13264	6.44029	5.3452	4	2	12	12	270	251	95	66202	chr17	67367821	67368330	+	Intergenic	Intergenic	-13618	ENSMUST00000224091.1	ENSMUST00000224091	ENSMUST00000224091	ENSMUSG00000033278	Ptprm	protein tyrosine phosphatase receptor type M [Source:MGI Symbol;Acc:MGI:102694]	17	66973942	67661452	-1
chr4_137727469_137728244	3.18944	2.72997	191.216	1.72569e-43	2.44529e-41	chr4 137727469 137728244	1.19117	1.4652	1.38662	1.6023	15.6042	13.753	9.67763	21	27	29	68	687	536	172	106118	chr4	137727470	137728244	+	promoter-TSS (ENSMUST00000123011.7)	#NAME?	95	ENSMUST00000123011.7	ENSMUST00000123011	ENSMUST00000123011	ENSMUSG00000041351	Rap1gap	Rap1 GTPase-activating protein [Source:MGI Symbol;Acc:MGI:109338]	4	137392037	137457172	1
chr15_58726981_58727359	4.81893	1.19789	191.151	1.78252e-43	2.52256e-41	chr15 58726981 58727359	0.170167	0.1628	0.191258	0.141379	5.17868	4.84946	3.93857	3	3	4	6	228	189	70	52201	chr15	58726982	58727359	+	Intergenic	Intergenic	54781	ENSMUST00000176387.1	ENSMUST00000176387	ENSMUST00000176387	ENSMUSG00000093677	Gm20712	predicted gene 20712 [Source:MGI Symbol;Acc:MGI:5313159]	15	58652310	58653800	-1
chr1_90380371_90380937	4.85369	1.22117	190.974	1.94859e-43	2.75401e-41	chr1 90380371 90380937	0.283612	0.108533	0.0956292	0.164943	5.33767	4.84946	4.0511	5	2	2	7	235	189	72	4840	chr1	90380372	90380937	+	Intergenic	Intergenic	53342	ENSMUST00000184315.1	ENSMUST00000184315	ENSMUST00000184315	NA	NA	NA	NA	NA	NA	NA
chr13_90550994_90551586	3.31621	1.97741	190.929	1.99318e-43	2.81341e-41	chr13 90550994 90551586	0.680669	0.542665	0.812849	0.942529	8.04058	7.56927	7.65208	12	10	17	40	354	295	136	40830	chr13	90550995	90551586	+	Intergenic	Intergenic	-32039	ENSMUST00000179654.2	ENSMUST00000179654	ENSMUST00000179654	ENSMUSG00000094277	Gm21726	predicted gene, 21726 [Source:MGI Symbol;Acc:MGI:5433890]	13	90731448	90731839	1
chr2_3153925_3154483	3.40279	2.18065	190.907	2.01546e-43	2.84121e-41	chr2 3153925 3154483	0.680669	0.651198	1.24318	0.801149	8.88098	10.1351	7.87714	12	12	26	34	391	395	140	77726	chr2	3153926	3154483	+	intron (ENSMUST00000062934.6, intron 1 of 7)	-intron (ENSMUST00000062934.6, intron 1 of 7)	35519	ENSMUST00000062934.6	ENSMUST00000062934	ENSMUST00000062934	ENSMUSG00000050530	Fam171a1	family with sequence similarity 171, member A1 [Source:MGI Symbol;Acc:MGI:2442917]	2	3115261	3228843	1
chr14_55653467_55654308	4.01179	1.90198	190.783	2.14448e-43	3.0192e-41	chr14 55653467 55654308	0.170167	0.596932	0.573775	0.494828	7.15475	9.36537	6.24545	3	11	12	21	315	365	111	45968	chr14	55653468	55654308	+	TTS (ENSMUST00000227568.1)	#NAME?	3681	ENSMUST00000228041.1	ENSMUST00000228041	ENSMUST00000228041	ENSMUSG00000007591	Tssk4	testis-specific serine kinase 4 [Source:MGI Symbol;Acc:MGI:1918349]	14	55887641	55889996	1
chr8_34978756_34979290	4.29883	1.51742	190.703	2.23309e-43	3.13993e-41	chr8 34978756 34979290	0.397057	0.108533	0.382517	0.282759	6.58691	5.90146	4.89508	7	2	8	12	290	230	87	136697	chr8	34978757	34979290	+	intron (ENSMUST00000209512.1, intron 1 of 2)	-intron (ENSMUST00000209512.1, intron 1 of 2)	851	ENSMUST00000209512.1	ENSMUST00000209512	ENSMUST00000209512	ENSMUSG00000109717	Gm34368	predicted gene, 34368 [Source:MGI Symbol;Acc:MGI:5593527]	8	35434428	35447028	-1
chr19_23941278_23942001	3.8078	2.51536	190.634	2.31208e-43	3.24682e-41	chr19 23941278 23942001	0.170167	0.868264	1.19537	0.989655	13.6508	10.1351	11.5344	3	16	25	42	601	395	205	74753	chr19	23941279	23942001	+	promoter-TSS (ENSMUST00000236338.1)	#NAME?	-46	ENSMUST00000236338.1	ENSMUST00000236338	ENSMUST00000236338	ENSMUSG00000118340	Gm50301	predicted gene, 50301 [Source:MGI Symbol;Acc:MGI:6303149]	19	23907189	23918958	-1
chr4_43011582_43012209	4.18665	2.2827	190.611	2.33821e-43	3.27932e-41	chr4 43011582 43012209	0.680669	0.651198	0.765034	0.259195	11.3113	11.3411	7.31449	12	12	16	11	498	442	130	99918	chr4	43011583	43012209	+	Intergenic	Intergenic	-1390	ENSMUST00000132273.1	ENSMUST00000132273	ENSMUST00000132273	ENSMUSG00000028453	Fancg	Fanconi anemia, complementation group G [Source:MGI Symbol;Acc:MGI:1926471]	4	43002343	43010506	-1
chr8_40272189_40273011	2.91475	2.77568	190.536	2.42811e-43	3.39672e-41	chr8 40272189 40273011	1.36134	1.628	2.43855	1.57874	14.3322	12.9832	12.2096	24	30	51	67	631	506	217	136947	chr8	40272190	40273011	+	Intergenic	Intergenic	14353	ENSMUST00000034014.13	ENSMUST00000034014	ENSMUST00000034014	ENSMUSG00000031603	Fgf20	fibroblast growth factor 20 [Source:MGI Symbol;Acc:MGI:1891346]	8	40732207	40761372	-1
chr11_108372066_108372630	5.18263	1.14745	190.537	2.42683e-43	3.39672e-41	chr11 108372066 108372630	0.22689	0.108533	0.0478146	0.117816	5.06511	4.77249	3.71351	4	2	1	5	223	186	66	27401	chr11	108372067	108372630	+	intron (ENSMUST00000133383.7, intron 1 of 2)	-intron (ENSMUST00000133383.7, intron 1 of 2)	-5529	ENSMUST00000139207.1	ENSMUST00000139207	ENSMUST00000139207	ENSMUSG00000084916	Gm11656	predicted gene 11656 [Source:MGI Symbol;Acc:MGI:3651000]	11	108268703	108271919	1
chr13_110406094_110406698	3.2095	2.23427	190.439	2.55019e-43	3.56295e-41	chr13 110406094 110406698	0.680669	0.922531	1.24318	1.06034	8.7447	10.3404	8.55232	12	17	26	45	385	403	152	42366	chr13	110406095	110406698	+	Intergenic	Intergenic	8599	ENSMUST00000225156.1	ENSMUST00000225156	ENSMUST00000225156	ENSMUSG00000021701	Plk2	polo like kinase 2 [Source:MGI Symbol;Acc:MGI:1099790]	13	110531580	110537378	1
chr15_59194168_59194867	3.34213	1.94291	190.364	2.64734e-43	3.69283e-41	chr15 59194168 59194867	0.907559	0.759731	0.525961	0.777586	7.85887	6.95347	7.9334	16	14	11	33	346	271	141	52283	chr15	59194169	59194867	+	Intergenic	Intergenic	-16390	ENSMUST00000027054.9	ENSMUST00000027054	ENSMUST00000027054	ENSMUSG00000025922	Rpl7-ps8	ribosomal protein L7, pseudogene 8 [Source:MGI Symbol;Acc:MGI:3647181]	15	59082757	59083566	1
chr12_81923575_81924141	3.91641	1.98298	190.362	2.64988e-43	3.69283e-41	chr12 81923575 81924141	0.964281	0.542665	0.286888	0.424138	8.88098	8.36468	6.69557	17	10	6	18	391	326	119	33001	chr12	81923576	81924141	+	intron (ENSMUST00000221675.1, intron 1 of 25)	-intron (ENSMUST00000021567.5, intron 6 of 35)	5215	ENSMUST00000221675.1	ENSMUST00000221675	ENSMUST00000221675	ENSMUSG00000021140	Pcnx	pecanex homolog [Source:MGI Symbol;Acc:MGI:1891924]	12	81906797	82047698	1
chr15_41665702_41666284	4.3261	1.33066	190.314	2.71502e-43	3.77881e-41	chr15 41665702 41666284	0.22689	0.325599	0.191258	0.259195	4.67898	5.61922	5.06387	4	6	4	11	206	219	90	51521	chr15	41665703	41666284	+	intron (ENSMUST00000230203.1, intron 3 of 15)	-intron (ENSMUST00000090096.10, intron 3 of 15)	-44611	ENSMUST00000229769.1	ENSMUST00000229769	ENSMUST00000229769	ENSMUSG00000022307	Oxr1	oxidation resistance 1 [Source:MGI Symbol;Acc:MGI:2179326]	15	41310878	41724444	1
chr14_8334198_8334783	3.63944	2.14808	190.22	2.84637e-43	3.9566e-41	chr14 8334198 8334783	0.510502	0.596932	1.09974	0.65977	7.5636	8.77522	10.8029	9	11	23	28	333	342	192	43114	chr14	8334199	8334783	+	Intergenic	Intergenic	-16468	ENSMUST00000120411.8	ENSMUST00000120411	ENSMUST00000120411	ENSMUSG00000021750	Fam107a	family with sequence similarity 107, member A [Source:MGI Symbol;Acc:MGI:3041256]	14	14151750	14173499	1
chr13_36367632_36368328	2.74719	2.83641	190.175	2.91155e-43	4.04208e-41	chr13 36367632 36368328	1.70167	2.06213	2.58199	1.76724	14.5594	13.2655	12.716	30	38	54	75	641	517	226	37574	chr13	36367633	36368328	+	intron (ENSMUST00000224357.1, intron 1 of 2)	-intron (ENSMUST00000021857.12, intron 5 of 6)	21286	ENSMUST00000224357.1	ENSMUST00000224357	ENSMUST00000224357	ENSMUSG00000021420	Fars2	phenylalanine-tRNA synthetase 2, mitochondrial [Source:MGI Symbol;Acc:MGI:1917205]	13	36301395	36910254	1
chr1_190448367_190448948	4.08015	1.89731	190.129	2.9797e-43	4.13147e-41	chr1 190448367 190448948	0.340335	0.488399	0.239073	0.612644	8.54028	8.416	5.73906	6	9	5	26	376	328	102	10709	chr1	190448368	190448948	+	Intergenic	Intergenic	-3803	ENSMUST00000195170.1	ENSMUST00000195170	ENSMUST00000195170	ENSMUSG00000103510	Gm30725	predicted gene, 30725 [Source:MGI Symbol;Acc:MGI:5589884]	1	190151530	190177052	-1
chr4_62254512_62254985	4.97829	1.07962	190.078	3.05716e-43	4.22817e-41	chr4 62254512 62254985	0.170167	0.217066	0.143444	0.0706896	4.24742	4.208	4.61375	3	4	3	3	187	164	82	101188	chr4	62254513	62254985	+	Intergenic	Intergenic	-7813	ENSMUST00000107468.7	ENSMUST00000107468	ENSMUST00000107468	ENSMUSG00000066152	Slc31a2	solute carrier family 31, member 2 [Source:MGI Symbol;Acc:MGI:1333844]	4	62180799	62216648	1
chr7_126232149_126232705	4.69826	1.38736	190.08	3.05422e-43	4.22817e-41	chr7 126232149 126232705	0.283612	0.1628	0.191258	0.188506	5.97365	5.85015	4.10737	5	3	4	8	263	228	73	133453	chr7	126232150	126232705	+	intron (ENSMUST00000206035.1, intron 2 of 4)	-intron (ENSMUST00000206035.1, intron 2 of 4)	10200	ENSMUST00000205724.1	ENSMUST00000205724	ENSMUST00000205724	ENSMUSG00000108309	Gm44703	predicted gene 44703 [Source:MGI Symbol;Acc:MGI:5753279]	7	125841552	125841799	-1
chr5_96042365_96043061	3.37606	2.16131	189.923	3.30428e-43	4.56419e-41	chr5 96042365 96043061	1.021	0.813998	0.573775	0.966092	7.60902	9.10878	10.1277	18	15	12	41	335	355	180	112749	chr5	96042366	96043061	+	Intergenic	Intergenic	44220	ENSMUST00000152490.7	ENSMUST00000152490	ENSMUST00000152490	ENSMUSG00000034724	Cnot6l	CCR4-NOT transcription complex, subunit 6-like [Source:MGI Symbol;Acc:MGI:2443154]	5	96218192	96312030	-1
chr12_100379532_100381465	2.35452	3.46055	189.836	3.45175e-43	4.76189e-41	chr12 100379532 100381465	3.63023	4.77545	3.49047	3.81724	19.3292	20.8347	19.9742	64	88	73	162	851	812	355	34114	chr12	100379533	100381465	+	intron (ENSMUST00000223020.1, intron 13 of 20)	-intron (ENSMUST00000062957.7, intron 13 of 19)	5401	ENSMUST00000221975.1	ENSMUST00000221975	ENSMUST00000221975	ENSMUSG00000033530	Ttc7b	tetratricopeptide repeat domain 7B [Source:MGI Symbol;Acc:MGI:2144724]	12	100267029	100487085	-1
chr10_86459604_86460321	2.80092	3.01953	189.76	3.58645e-43	4.94151e-41	chr10 86459604 86460321	2.2689	1.95359	2.67762	2.02644	16.5127	17.3195	12.4346	40	36	56	86	727	675	221	16628	chr10	86459605	86460321	+	intron (ENSMUST00000145864.7, intron 2 of 8)	-intron (ENSMUST00000120638.7, intron 2 of 13)	31934	ENSMUST00000145864.7	ENSMUST00000145864	ENSMUST00000145864	ENSMUSG00000059602	Syn3	synapsin III [Source:MGI Symbol;Acc:MGI:1351334]	10	85890989	86334760	-1
chr18_68090629_68091415	3.42225	2.24345	189.714	3.67005e-43	5.05035e-41	chr18 68090629 68091415	0.623947	1.24813	0.525961	1.03678	10.1984	9.49366	8.55232	11	23	11	44	449	370	152	72157	chr18	68090630	68091415	+	intron (ENSMUST00000063775.4, intron 2 of 5)	-intron (ENSMUST00000063775.4, intron 2 of 5)	27352	ENSMUST00000236198.1	ENSMUST00000236198	ENSMUST00000236198	ENSMUSG00000117891	Gm41764	predicted gene, 41764 [Source:MGI Symbol;Acc:MGI:5624649]	18	68231418	68251445	-1
chr14_15168843_15169630	3.61531	2.7999	189.607	3.87337e-43	5.32345e-41	chr14 15168843 15169630	1.41806	0.705465	1.57788	0.966092	18.4434	12.8036	11.0843	25	13	33	41	812	499	197	43542	chr14	15168844	15169630	+	Intergenic	Intergenic	-12024	ENSMUST00000225983.1	ENSMUST00000225983	ENSMUST00000225983	ENSMUSG00000114323	Gm47758	predicted gene, 47758 [Source:MGI Symbol;Acc:MGI:6096907]	14	7312550	7314872	1
chr6_56034997_56035593	4.42945	1.35687	189.492	4.10374e-43	5.63302e-41	chr6 56034997 56035593	0.170167	0.271333	0.191258	0.282759	6.01908	4.82381	4.78255	3	5	4	12	265	188	85	120755	chr6	56034998	56035593	+	Intergenic	Intergenic	17798	ENSMUST00000052827.5	ENSMUST00000052827	ENSMUST00000052827	ENSMUSG00000002930	Ppp1r17	protein phosphatase 1, regulatory subunit 17 [Source:MGI Symbol;Acc:MGI:1333876]	6	55994482	56009674	1
chr2_92162122_92162826	4.23757	1.51942	189.369	4.36687e-43	5.98671e-41	chr2 92162122 92162826	0.510502	0.325599	0.143444	0.282759	6.15536	6.26068	4.95134	9	6	3	12	271	244	88	83277	chr2	92162123	92162826	+	intron (ENSMUST00000111297.9, intron 1 of 16)	-intron (ENSMUST00000044036.14, intron 1 of 15)	-21632	ENSMUST00000111294.7	ENSMUST00000111294	ENSMUST00000111294	ENSMUSG00000058318	Phf21a	PHD finger protein 21A [Source:MGI Symbol;Acc:MGI:2384756]	2	92014451	92195011	1
chr2_127521068_127522513	2.62003	3.79252	189.242	4.65451e-43	6.37308e-41	chr2 127521068 127522513	4.25418	3.90719	5.16398	3.77011	29.5503	28.558	20.143	75	72	108	160	1301	1113	358	85328	chr2	127521069	127522513	+	promoter-TSS (ENSMUST00000028850.14)	#NAME?	303	ENSMUST00000137625.1	ENSMUST00000137625	ENSMUST00000137625	ENSMUSG00000079056	Kcnip3	Kv channel interacting protein 3, calsenilin [Source:MGI Symbol;Acc:MGI:1929258]	2	127298418	127364014	-1
chr9_120702845_120703897	2.28183	3.41298	189.152	4.86944e-43	6.65905e-41	chr9 120702845 120703897	3.57351	4.23279	3.82517	4.1	19.6018	19.8084	18.1174	63	78	80	174	863	772	322	150455	chr9	120702846	120703897	+	Intergenic	Intergenic	2866	ENSMUST00000213340.1	ENSMUST00000213340	ENSMUST00000213340	ENSMUSG00000111679	Gm47063	predicted gene, 47063 [Source:MGI Symbol;Acc:MGI:6095774]	9	120534955	120535303	-1
chr14_102953471_102954123	4.01583	1.66205	189.121	4.9462e-43	6.75559e-41	chr14 102953471 102954123	0.397057	0.596932	0.239073	0.377011	5.45124	6.7482	7.25822	7	11	5	16	240	263	129	48633	chr14	102953472	102954123	+	Intergenic	Intergenic	27754	ENSMUST00000183756.1	ENSMUST00000183756	ENSMUST00000183756	ENSMUSG00000098557	Kctd12	potassium channel tetramerisation domain containing 12 [Source:MGI Symbol;Acc:MGI:2145823]	14	103214017	103220073	-1
chr17_56445296_56445855	3.88201	1.833	189.101	4.99541e-43	6.81432e-41	chr17 56445296 56445855	0.680669	0.217066	0.573775	0.471264	7.97244	7.6719	5.79532	12	4	12	20	351	299	103	65581	chr17	56445297	56445855	+	TTS (ENSMUST00000224571.1)	#NAME?	2050	ENSMUST00000224006.1	ENSMUST00000224006	ENSMUST00000224006	ENSMUSG00000013236	Ptprs	protein tyrosine phosphatase receptor type S [Source:MGI Symbol;Acc:MGI:97815]	17	56719426	56783483	-1
chr11_55863741_55864363	3.55877	2.00862	188.902	5.52182e-43	7.52306e-41	chr11 55863741 55864363	0.907559	0.542665	0.908478	0.471264	8.67656	7.92849	7.37075	16	10	19	20	382	309	131	22614	chr11	55863742	55864363	+	intron (ENSMUST00000134285.1, intron 1 of 4)	-intron (ENSMUST00000134285.1, intron 1 of 4)	91964	ENSMUST00000134285.1	ENSMUST00000134285	ENSMUST00000134285	ENSMUSG00000086020	Gm12239	predicted gene 12239 [Source:MGI Symbol;Acc:MGI:3651547]	11	55662914	55961674	1
chr14_76755568_76756259	3.78863	1.89454	188.856	5.649e-43	7.68678e-41	chr14 76755568 76756259	0.737391	0.434132	0.525961	0.494828	9.15354	6.44029	6.8081	13	8	11	21	403	251	121	47642	chr14	76755569	76756259	+	Intergenic	Intergenic	-4217	ENSMUST00000228541.1	ENSMUST00000228541	ENSMUST00000228541	ENSMUSG00000115709	4930431P22Rik	RIKEN cDNA 4930431P22 gene [Source:MGI Symbol;Acc:MGI:1921133]	14	76997571	76999657	1
chr2_129056517_129057131	3.4701	2.01566	188.85	5.66608e-43	7.70046e-41	chr2 129056517 129057131	0.623947	0.976797	0.765034	0.58908	8.94912	8.08244	6.86436	11	18	16	25	394	315	122	85455	chr2	129056518	129057131	+	Intergenic	Intergenic	-8652	ENSMUST00000145798.3	ENSMUST00000145798	ENSMUST00000145798	ENSMUSG00000079051	Vinac1	vinculin/alpha-catenin family member 1 [Source:MGI Symbol;Acc:MGI:3649276]	2	128866993	128890092	-1
chr6_88743587_88744558	3.73345	2.7492	188.77	5.8982e-43	8.00601e-41	chr6 88743587 88744558	1.07773	0.705465	0.717219	1.46092	16.3537	15.1385	9.67763	19	13	15	62	720	590	172	122294	chr6	88743588	88744558	+	exon (ENSMUST00000204286.1, exon 1 of 1)	-exon (ENSMUST00000204286.1, exon 1 of 1)	1346	ENSMUST00000204286.1	ENSMUST00000204286	ENSMUST00000204286	ENSMUSG00000107835	Gm43999	predicted gene, 43999 [Source:MGI Symbol;Acc:MGI:5690391]	6	88719709	88722597	1
chr2_102930491_102931264	4.17815	1.3846	188.673	6.1952e-43	8.39875e-41	chr2 102930491 102931264	0.340335	0.271333	0.191258	0.329885	4.81526	5.49093	5.68279	6	5	4	14	212	214	101	83763	chr2	102930492	102931264	+	Intergenic	Intergenic	-29213	ENSMUST00000111194.7	ENSMUST00000111194	ENSMUST00000111194	ENSMUSG00000005087	Cd44	CD44 antigen [Source:MGI Symbol;Acc:MGI:88338]	2	102641486	102732010	-1
chr13_12176452_12177132	3.59563	1.88474	188.531	6.65233e-43	9.00734e-41	chr13 12176452 12177132	0.397057	0.325599	0.860663	0.73046	7.4046	7.62059	7.14569	7	6	18	31	326	297	127	36157	chr13	12176453	12177132	+	TTS (ENSMUST00000221565.1)	#NAME?	2489	ENSMUST00000221565.1	ENSMUST00000221565	ENSMUST00000221565	ENSMUSG00000113789	Gm47322	predicted gene, 47322 [Source:MGI Symbol;Acc:MGI:6096206]	13	12192344	12194167	-1
chr3_32029452_32030069	2.93911	2.50467	188.422	7.02642e-43	9.50212e-41	chr3 32029452 32030069	1.87184	1.19386	1.38662	1.29598	11.97	10.7766	9.84642	33	22	29	55	527	420	175	90790	chr3	32029453	32030069	+	intron (ENSMUST00000178668.1, intron 2 of 6)	-intron (ENSMUST00000119310.7, intron 1 of 4)	74997	ENSMUST00000194517.1	ENSMUST00000194517	ENSMUST00000194517	ENSMUSG00000103539	Gm37834	predicted gene, 37834 [Source:MGI Symbol;Acc:MGI:5611062]	3	32008913	32011947	1
chr14_60493995_60494798	5.34093	0.904298	188.397	7.11479e-43	9.60978e-41	chr14 60493995 60494798	0.113445	0.108533	0.0478146	0.0942529	4.06572	3.72049	3.71351	2	2	1	4	179	145	66	46321	chr14	60493996	60494798	+	intron (ENSMUST00000190392.1, intron 1 of 2)	-intron (ENSMUST00000190392.1, intron 1 of 2)	9189	ENSMUST00000190392.1	ENSMUST00000190392	ENSMUST00000190392	ENSMUSG00000101797	Gm29266	predicted gene 29266 [Source:MGI Symbol;Acc:MGI:5579972]	14	60722612	60837434	1
chr3_101287878_101288462	4.06402	2.21556	188.378	7.18322e-43	9.69028e-41	chr3 101287878 101288462	0.737391	0.271333	0.478146	0.706896	11.7656	10.0581	6.6393	13	5	10	30	518	392	118	94714	chr3	101287879	101288462	+	promoter-TSS (ENSMUST00000029456.4)	#NAME?	-231	ENSMUST00000029456.4	ENSMUST00000029456	ENSMUST00000029456	ENSMUSG00000027863	Cd2	CD2 antigen [Source:MGI Symbol;Acc:MGI:88320]	3	101183215	101195255	-1
chr7_79898586_79899197	3.85774	1.77536	188.295	7.48861e-43	1.00898e-40	chr7 79898586 79899197	0.170167	0.596932	0.478146	0.565517	7.72259	7.00478	5.90785	3	11	10	24	340	273	105	130356	chr7	79898587	79899197	+	intron (ENSMUST00000206725.1, intron 5 of 5)	-intron (ENSMUST00000075657.7, intron 4 of 5)	-18045	ENSMUST00000180715.2	ENSMUST00000180715	ENSMUST00000180715	ENSMUSG00000097685	Gm26646	predicted gene, 26646 [Source:MGI Symbol;Acc:MGI:5477140]	7	79566685	79570389	1
chr16_86529422_86530022	4.91909	1.16171	188.268	7.59215e-43	1.02168e-40	chr16 86529422 86530022	0.170167	0.108533	0.0956292	0.188506	3.90672	5.00342	5.06387	3	2	2	8	172	195	90	60850	chr16	86529423	86530022	+	Intergenic	Intergenic	-229177	ENSMUST00000232053.1	ENSMUST00000232053	ENSMUST00000232053	ENSMUSG00000116906	Gm49572	predicted gene, 49572 [Source:MGI Symbol;Acc:MGI:6214965]	16	86555787	86556264	1
chr16_12126558_12127223	3.4017	1.93764	188.248	7.6707e-43	1.03098e-40	chr16 12126558 12127223	0.680669	0.813998	0.908478	0.541954	7.13204	7.41532	8.21473	12	15	19	23	314	289	146	56849	chr16	12126559	12127223	+	intron (ENSMUST00000170672.8, intron 2 of 4)	-intron (ENSMUST00000023138.7, intron 2 of 3)	142171	ENSMUST00000229804.1	ENSMUST00000229804	ENSMUST00000229804	ENSMUSG00000022494	Shisa9	shisa family member 9 [Source:MGI Symbol;Acc:MGI:1919805]	16	11801977	12088766	1
chr10_57806555_57807085	4.1413	1.72388	188.185	7.91754e-43	1.06286e-40	chr10 57806555 57807085	0.340335	0.217066	0.669405	0.306322	7.17747	7.41532	5.45773	6	4	14	13	316	289	97	14240	chr10	57806556	57807085	+	intron (ENSMUST00000125076.1, intron 4 of 4)	-intron (ENSMUST00000020022.7, intron 4 of 7)	12252	ENSMUST00000125076.1	ENSMUST00000125076	ENSMUST00000125076	ENSMUSG00000019872	Smpdl3a	sphingomyelin phosphodiesterase, acid-like 3A [Source:MGI Symbol;Acc:MGI:1931437]	10	57670431	57687926	1
chr6_28902497_28903100	2.9759	2.98087	188.131	8.13494e-43	1.09071e-40	chr6 28902497 28903100	1.24789	2.00786	1.67351	2.63908	14.7183	16.6781	14.854	22	37	35	112	648	650	264	118732	chr6	28902498	28903100	+	intron (ENSMUST00000167201.1, intron 16 of 16)	-intron (ENSMUST00000167201.1, intron 16 of 16)	22756	ENSMUST00000165151.1	ENSMUST00000165151	ENSMUST00000165151	ENSMUSG00000001424	Snd1	staphylococcal nuclease and tudor domain containing 1 [Source:MGI Symbol;Acc:MGI:1929266]	6	28475138	28935161	1
chr15_57837472_57838776	3.19367	2.06648	188.007	8.65859e-43	1.1595e-40	chr15 57837472 57838776	1.021	0.813998	0.62159	1.03678	8.29043	8.28771	7.9334	18	15	13	44	365	323	141	52152	chr15	57837473	57838776	+	intron (ENSMUST00000096430.10, intron 3 of 3)	-intron (ENSMUST00000096430.10, intron 3 of 3)	52270	ENSMUST00000226911.1	ENSMUST00000226911	ENSMUST00000226911	ENSMUSG00000022365	Derl1	Der1-like domain family, member 1 [Source:MGI Symbol;Acc:MGI:1915069]	15	57732898	57755844	-1
chr1_84225974_84226723	3.45616	1.92477	187.799	9.61303e-43	1.28574e-40	chr1 84225974 84226723	0.510502	0.922531	0.430332	0.801149	7.85887	7.59493	7.08942	9	17	9	34	346	296	126	4323	chr1	84225975	84226723	+	intron (ENSMUST00000176822.1, intron 2 of 4)	-intron (ENSMUST00000168574.8, intron 1 of 2)	-7388	ENSMUST00000183596.1	ENSMUST00000183596	ENSMUST00000183596	ENSMUSG00000098851	Mir6353	microRNA 6353 [Source:MGI Symbol;Acc:MGI:5530773]	1	84196570	84196682	-1
chr14_33467686_33468222	4.00989	1.63988	187.711	1.00448e-42	1.34185e-40	chr14 33467686 33468222	0.340335	0.217066	0.334702	0.541954	7.10933	6.26068	5.514	6	4	7	23	313	244	98	44885	chr14	33467687	33468222	+	Intergenic	Intergenic	-3742	ENSMUST00000208853.1	ENSMUST00000208853	ENSMUST00000208853	ENSMUSG00000108841	Frmpd2	FERM and PDZ domain containing 2 [Source:MGI Symbol;Acc:MGI:2685472]	14	33193653	33297226	1
chr17_73282397_73283180	3.40259	1.85219	187.687	1.01654e-42	1.35488e-40	chr17 73282397 73283180	0.623947	0.759731	0.669405	0.636207	7.51817	7.46664	6.18918	11	14	14	27	331	291	110	66628	chr17	73282398	73283180	+	Intergenic	Intergenic	30244	ENSMUST00000233479.1	ENSMUST00000233479	ENSMUST00000233479	ENSMUSG00000117292	E330032C10Rik	RIKEN cDNA E330032C10 gene [Source:MGI Symbol;Acc:MGI:4437727]	17	73557981	73567651	1
chr6_124419631_124420084	4.41111	1.30273	187.687	1.0167e-42	1.35488e-40	chr6 124419631 124420084	0.170167	0.108533	0.191258	0.353448	4.8834	5.13171	5.17641	3	2	4	15	215	200	92	124640	chr6	124419632	124420084	+	Intergenic	Intergenic	-4791	ENSMUST00000080557.11	ENSMUST00000080557	ENSMUST00000080557	ENSMUSG00000005069	Pex5	peroxisomal biogenesis factor 5 [Source:MGI Symbol;Acc:MGI:1098808]	6	124373775	124392026	-1
chr10_111460425_111460999	3.40262	1.9019	187.497	1.11874e-42	1.48905e-40	chr10 111460425 111460999	0.453779	0.651198	0.860663	0.754023	6.88219	7.21005	8.21473	8	12	18	32	303	281	146	18100	chr10	111460426	111460999	+	Intergenic	Intergenic	-12511	ENSMUST00000065917.15	ENSMUST00000065917	ENSMUST00000065917	ENSMUSG00000058799	Nap1l1	nucleosome assembly protein 1-like 1 [Source:MGI Symbol;Acc:MGI:1855693]	10	111309084	111334011	1
chr5_35388261_35389181	4.45943	2.51111	187.47	1.13394e-42	1.50745e-40	chr5 35388261 35389181	0.737391	0.434132	0.62159	0.424138	15.6269	13.2398	6.69557	13	8	13	18	688	516	119	109692	chr5	35388262	35389181	+	promoter-TSS (ENSMUST00000069741.3)	#NAME?	-245	ENSMUST00000069741.3	ENSMUST00000069741	ENSMUST00000069741	ENSMUSG00000055944	E130018O15Rik	RIKEN cDNA E130018O15 gene [Source:MGI Symbol;Acc:MGI:3045238]	5	35536496	35545820	-1
chr13_72661258_72662170	4.64117	1.36771	187.456	1.14181e-42	1.51608e-40	chr13 72661258 72662170	0.113445	0.217066	0.191258	0.259195	5.47395	6.10673	4.16363	2	4	4	11	241	238	74	40211	chr13	72661259	72662170	+	Intergenic	Intergenic	29117	ENSMUST00000172353.2	ENSMUST00000172353	ENSMUST00000172353	ENSMUSG00000001504	Irx2	Iroquois homeobox 2 [Source:MGI Symbol;Acc:MGI:1197526]	13	72776939	72782317	1
chr10_84797514_84798181	4.41859	1.67461	187.385	1.18323e-42	1.56917e-40	chr10 84797514 84798181	0.397057	0.217066	0.286888	0.306322	7.81344	7.00478	4.61375	7	4	6	13	344	273	82	16476	chr10	84797515	84798181	+	intron (ENSMUST00000173479.1, intron 2 of 3)	-intron (ENSMUST00000060397.12, intron 2 of 17)	13335	ENSMUST00000158826.1	ENSMUST00000158826	ENSMUST00000158826	NA	NA	NA	NA	NA	NA	NA
chr5_77372656_77373355	2.94638	2.74902	187.132	1.34403e-42	1.78028e-40	chr5 77372656 77373355	2.04201	1.24813	2.15166	1.39023	14.0824	11.8286	13.0535	36	23	45	59	620	461	232	112038	chr5	77372657	77373355	+	intron (ENSMUST00000046746.9, intron 1 of 4)	-intron (ENSMUST00000046746.9, intron 1 of 4)	-13593	ENSMUST00000202460.1	ENSMUST00000202460	ENSMUST00000202460	ENSMUSG00000106828	Gm34648	predicted gene, 34648 [Source:MGI Symbol;Acc:MGI:5593807]	5	77534446	77541530	1
chr4_72382387_72383060	3.47304	2.41081	187.093	1.37083e-42	1.81358e-40	chr4 72382387 72383060	0.964281	1.24813	0.860663	0.848276	8.69927	9.85288	13.8975	17	23	18	36	383	384	247	101624	chr4	72382388	72383060	+	Intergenic	Intergenic	-159942	ENSMUST00000117763.1	ENSMUST00000117763	ENSMUST00000117763	ENSMUSG00000083372	Gm11235	predicted gene 11235 [Source:MGI Symbol;Acc:MGI:3651442]	4	72460903	72461235	1
chr9_33420495_33421275	2.5127	3.24557	187.033	1.41244e-42	1.86638e-40	chr9 33420495 33421275	2.94957	2.87613	2.58199	3.74655	17.762	16.5754	18.6801	52	53	54	159	782	646	332	144039	chr9	33420496	33421275	+	Intergenic	Intergenic	71129	ENSMUST00000213509.1	ENSMUST00000213509	ENSMUST00000213509	ENSMUSG00000111878	Gm47777	predicted gene, 47777 [Source:MGI Symbol;Acc:MGI:6096938]	9	33393479	33403310	-1
chr13_98603763_98604324	4.45859	1.34891	186.858	1.5424e-42	2.03565e-40	chr13 98603763 98604324	0.283612	0.108533	0.382517	0.188506	4.72441	5.15737	5.90785	5	2	8	8	208	201	105	41487	chr13	98603764	98604324	+	Intergenic	Intergenic	-9457	ENSMUST00000223936.1	ENSMUST00000223936	ENSMUST00000223936	ENSMUSG00000114733	Gm4815	predicted gene 4815 [Source:MGI Symbol;Acc:MGI:3643439]	13	98750009	98751002	1
chr15_101011441_101011702	4.83114	1.43572	186.788	1.59746e-42	2.10579e-40	chr15 101011441 101011702	0.113445	0.271333	0.191258	0.188506	6.65506	5.82449	4.0511	2	5	4	8	293	227	72	55823	chr15	101011442	101011702	+	TTS (ENSMUST00000201518.3)	#NAME?	-4365	ENSMUST00000201246.1	ENSMUST00000201246	ENSMUST00000201246	ENSMUSG00000023033	Scn8a	sodium channel, voltage-gated, type VIII, alpha [Source:MGI Symbol;Acc:MGI:103169]	15	100767739	100943819	1
chr8_61141125_61143005	2.87708	2.91897	186.76	1.62025e-42	2.13327e-40	chr8 61141125 61143005	2.15545	1.51946	1.53007	2.54483	13.4691	15.9596	14.4039	38	28	32	108	593	622	256	137930	chr8	61141126	61143005	+	intron (ENSMUST00000129408.1, intron 1 of 2)	-intron (ENSMUST00000129408.1, intron 1 of 2)	-29563	ENSMUST00000120685.1	ENSMUST00000120685	ENSMUST00000120685	ENSMUSG00000080956	Gm16179	predicted gene 16179 [Source:MGI Symbol;Acc:MGI:3801988]	8	61565164	61565536	-1
chr14_33307197_33308483	2.89441	2.41533	186.741	1.63621e-42	2.1517e-40	chr14 33307197 33308483	1.47478	1.628	1.29099	1.17816	10.6072	10.4943	9.34004	26	30	27	50	467	409	166	44866	chr14	33307198	33308483	+	intron (ENSMUST00000137590.7, intron 1 of 7)	-intron (ENSMUST00000111956.8, intron 4 of 10)	1722	ENSMUST00000137590.7	ENSMUST00000137590	ENSMUST00000137590	ENSMUSG00000063506	Arhgap22	Rho GTPase activating protein 22 [Source:MGI Symbol;Acc:MGI:2443418]	14	32935983	33091891	1
chr3_129838075_129838405	4.63541	1.37146	186.613	1.74473e-42	2.28891e-40	chr3 129838075 129838405	0.22689	0.108533	0.0478146	0.353448	5.06511	5.13171	6.02038	4	2	1	15	223	200	107	96435	chr3	129838076	129838405	+	intron (ENSMUST00000200206.4, intron 2 of 3)	-intron (ENSMUST00000077918.6, intron 1 of 13)	1503	ENSMUST00000077918.6	ENSMUST00000077918	ENSMUST00000077918	ENSMUSG00000058952	Cfi	complement component factor i [Source:MGI Symbol;Acc:MGI:105937]	3	129629533	129668981	1
chr17_11148029_11148693	3.07948	2.70477	186.615	1.74265e-42	2.28891e-40	chr17 11148029 11148693	1.58823	2.00786	1.48225	1.10747	14.7638	11.649	11.6469	28	37	31	47	650	454	207	62528	chr17	11148030	11148693	+	intron (ENSMUST00000233411.1, intron 2 of 6)	-intron (ENSMUST00000066658.12, intron 2 of 6)	-58893	ENSMUST00000190466.1	ENSMUST00000190466	ENSMUST00000190466	ENSMUSG00000100402	Gm28505	predicted gene 28505 [Source:MGI Symbol;Acc:MGI:5579211]	17	11301137	11308355	-1
chr2_19909314_19910197	2.99271	3.20056	186.577	1.77598e-42	2.32713e-40	chr2 19909314 19910197	1.81512	3.03893	1.33881	2.73333	17.5575	18.3459	18.1737	32	56	28	116	773	715	323	78755	chr2	19909315	19910197	+	promoter-TSS (ENSMUST00000114610.7)	#NAME?	-24	ENSMUST00000114610.7	ENSMUST00000114610	ENSMUST00000114610	ENSMUSG00000036617	Etl4	enhancer trap locus 4 [Source:MGI Symbol;Acc:MGI:95454]	2	19914591	20815524	1
chr2_169483873_169485112	3.12006	3.10513	186.538	1.81115e-42	2.37038e-40	chr2 169483873 169485112	1.13445	1.73653	2.34292	2.40345	19.3519	17.961	13.5599	20	32	49	102	852	700	241	88834	chr2	169483874	169485112	+	intron (ENSMUST00000156239.1, intron 3 of 5)	-intron (ENSMUST00000156239.1, intron 3 of 5)	3876	ENSMUST00000156239.1	ENSMUST00000156239	ENSMUST00000156239	ENSMUSG00000087074	Gm14249	predicted gene 14249 [Source:MGI Symbol;Acc:MGI:3651257]	2	169322537	169346763	1
chr1_38497033_38498530	2.58566	2.89904	186.471	1.87366e-42	2.44927e-40	chr1 38497033 38498530	2.04201	2.06213	2.86888	2.26207	14.2641	13.1115	14.4039	36	38	60	96	628	511	256	1644	chr1	38497034	38498530	+	intron (ENSMUST00000238906.1, intron 5 of 22)	-intron (ENSMUST00000027250.13, intron 5 of 7)	10263	ENSMUST00000195175.1	ENSMUST00000195175	ENSMUST00000195175	ENSMUSG00000102984	Gm34727	predicted gene, 34727 [Source:MGI Symbol;Acc:MGI:5593886]	1	38526600	38527128	1
chr3_104794297_104794925	3.11356	2.76807	186.433	1.90942e-42	2.49305e-40	chr3 104794297 104794925	1.64495	2.22493	1.48225	1.03678	13.4691	12.3418	14.3476	29	41	31	44	593	481	255	95002	chr3	104794298	104794925	+	TTS (ENSMUST00000002297.11)	#NAME?	2628	ENSMUST00000132721.1	ENSMUST00000132721	ENSMUST00000132721	ENSMUSG00000002233	Rhoc	ras homolog family member C [Source:MGI Symbol;Acc:MGI:106028]	3	104695691	104701775	1
chr4_105474792_105475491	3.14606	2.54582	186.403	1.93847e-42	2.52797e-40	chr4 105474792 105475491	1.19117	1.51946	1.14755	1.29598	11.9927	13.3681	8.72112	21	28	24	55	528	521	155	103141	chr4	105474793	105475491	+	Intergenic	Intergenic	-36090	ENSMUST00000120700.1	ENSMUST00000120700	ENSMUST00000120700	ENSMUSG00000083128	Gm12723	predicted gene 12723 [Source:MGI Symbol;Acc:MGI:3652213]	4	105368429	105368879	1
chr1_132144188_132144553	3.18319	1.98382	186.398	1.94395e-42	2.5321e-40	chr1 132144188 132144553	0.737391	1.08533	0.812849	0.777586	7.5636	7.59493	7.9334	13	20	17	33	333	296	141	6620	chr1	132144189	132144553	+	Intergenic	Intergenic	-4687	ENSMUST00000027697.11	ENSMUST00000027697	ENSMUST00000027697	ENSMUSG00000026437	Cdk18	cyclin dependent kinase 18 [Source:MGI Symbol;Acc:MGI:97518]	1	132039975	132067422	-1
chr3_19002103_19002636	2.96225	3.19925	186.353	1.98779e-42	2.58613e-40	chr3 19002103 19002636	2.21217	1.95359	2.77325	2.26207	15.2635	15.4721	23.5189	39	36	58	96	672	603	418	90155	chr3	19002104	19002636	+	Intergenic	Intergenic	141529	ENSMUST00000193065.1	ENSMUST00000193065	ENSMUST00000193065	ENSMUSG00000103135	Gm37979	predicted gene, 37979 [Source:MGI Symbol;Acc:MGI:5611207]	3	19197352	19198063	-1
chr3_88278848_88279616	3.77329	2.52043	186.267	2.07598e-42	2.69767e-40	chr3 88278848 88279616	0.850836	0.976797	1.09974	0.58908	13.1057	13.83	7.87714	15	18	23	25	577	539	140	93738	chr3	88278849	88279616	+	intron (ENSMUST00000165196.7, intron 1 of 9)	-intron (ENSMUST00000163277.1, intron 2 of 7)	5521	ENSMUST00000195161.1	ENSMUST00000195161	ENSMUST00000195161	ENSMUSG00000103574	Gm37116	predicted gene, 37116 [Source:MGI Symbol;Acc:MGI:5610344]	3	88191914	88192060	-1
chr6_90656422_90656967	4.04978	1.66055	186.193	2.15462e-42	2.79654e-40	chr6 90656422 90656967	0.453779	0.217066	0.478146	0.377011	6.65506	7.33834	5.06387	8	4	10	16	293	286	90	122414	chr6	90656423	90656967	+	exon (ENSMUST00000101153.9, exon 14 of 14)	-exon (ENSMUST00000101153.9, exon 14 of 14)	5593	ENSMUST00000204983.1	ENSMUST00000204983	ENSMUST00000204983	ENSMUSG00000034312	Iqsec1	IQ motif and Sec7 domain 1 [Source:MGI Symbol;Acc:MGI:1196356]	6	90633070	90965667	-1
chr17_50381786_50382403	4.19709	1.29484	186.039	2.32773e-42	3.01766e-40	chr17 50381786 50382403	0.22689	0.217066	0.239073	0.329885	4.74712	4.9521	5.28894	4	4	5	14	209	193	94	65302	chr17	50381787	50382403	+	intron (ENSMUST00000233175.1, intron 4 of 4)	-intron (ENSMUST00000233175.1, intron 4 of 4)	42843	ENSMUST00000233175.1	ENSMUST00000233175	ENSMUST00000233175	ENSMUSG00000117222	Gm49906	predicted gene, 49906 [Source:MGI Symbol;Acc:MGI:6270604]	17	50646280	50705503	1
chr17_56116397_56117871	2.23879	3.64319	185.985	2.39259e-42	3.09808e-40	chr17 56116397 56117871	4.25418	4.39559	4.78146	5.39598	23.3722	22.8104	21.0995	75	81	100	229	1029	889	375	65530	chr17	56116398	56117871	+	exon (ENSMUST00000019808.11, exon 2 of 9)	-exon (ENSMUST00000019808.11, exon 2 of 9)	164	ENSMUST00000113072.2	ENSMUST00000113072	ENSMUST00000113072	ENSMUSG00000011305	Plin5	perilipin 5 [Source:MGI Symbol;Acc:MGI:1914218]	17	56418601	56424596	-1
chr9_105759342_105760027	3.8131	1.52956	185.942	2.44449e-42	3.16154e-40	chr9 105759342 105760027	0.397057	0.325599	0.382517	0.471264	5.7238	6.26068	5.28894	7	6	8	20	252	244	94	149309	chr9	105759343	105760027	+	intron (ENSMUST00000166431.8, intron 13 of 36)	-intron (ENSMUST00000098441.9, intron 13 of 36)	31900	ENSMUST00000195709.1	ENSMUST00000195709	ENSMUST00000195709	ENSMUSG00000102877	Gm38314	predicted gene, 38314 [Source:MGI Symbol;Acc:MGI:5611542]	9	105604984	105605608	1
chr5_111878949_111879495	5.02009	1.0791	185.866	2.53982e-42	3.28097e-40	chr5 111878949 111879495	0.0567224	0.1628	0.0956292	0.164943	4.5427	4.69551	3.65724	1	3	2	7	200	183	65	114071	chr5	111878950	111879495	+	Intergenic	Intergenic	65013	ENSMUST00000197648.1	ENSMUST00000197648	ENSMUST00000197648	ENSMUSG00000106060	Gm42488	predicted gene 42488 [Source:MGI Symbol;Acc:MGI:5662625]	5	112087670	112092101	-1
chr5_111755135_111755775	4.04136	1.56842	185.833	2.58188e-42	3.33139e-40	chr5 111755135 111755775	0.22689	0.379866	0.239073	0.494828	6.47335	6.28634	5.17641	4	7	5	21	285	245	92	114061	chr5	111755136	111755775	+	intron (ENSMUST00000137398.7, intron 1 of 4)	-intron (ENSMUST00000129065.7, intron 1 of 4)	6245	ENSMUST00000129146.1	ENSMUST00000129146	ENSMUST00000129146	ENSMUSG00000085271	E130006D01Rik	RIKEN cDNA E130006D01 gene [Source:MGI Symbol;Acc:MGI:2685527]	5	111881540	111909638	-1
chr3_88731323_88731960	3.29442	2.52877	185.796	2.63031e-42	3.38988e-40	chr3 88731323 88731960	1.021	1.08533	1.6257	0.966092	13.4918	11.572	9.00244	18	20	34	41	594	451	160	93802	chr3	88731324	88731960	+	TTS (ENSMUST00000166234.1)	#NAME?	8050	ENSMUST00000194270.1	ENSMUST00000194270	ENSMUST00000194270	ENSMUSG00000104333	Gm10253	predicted gene 10253 [Source:MGI Symbol;Acc:MGI:3641796]	3	88646060	88646999	-1
chr5_117875681_117876734	2.71022	3.02121	185.703	2.7561e-42	3.54783e-40	chr5 117875681 117876734	2.38234	2.06213	2.86888	2.12069	17.9437	13.9326	14.1226	42	38	60	90	790	543	251	114773	chr5	117875682	117876734	+	intron (ENSMUST00000171055.1, intron 1 of 27)	-intron (ENSMUST00000086451.11, intron 2 of 28)	3395	ENSMUST00000194276.1	ENSMUST00000194276	ENSMUST00000194276	ENSMUSG00000104071	Gm37028	predicted gene, 37028 [Source:MGI Symbol;Acc:MGI:5610256]	5	118010878	118010984	1
chr2_128694078_128694774	3.46378	2.04374	185.675	2.79499e-42	3.59367e-40	chr2 128694078 128694774	0.737391	0.434132	1.09974	0.683333	8.83555	8.416	7.20196	13	8	23	29	389	328	128	85430	chr2	128694079	128694774	+	Intergenic	Intergenic	-4530	ENSMUST00000014505.4	ENSMUST00000014505	ENSMUST00000014505	ENSMUSG00000014361	Mertk	MER proto-oncogene tyrosine kinase [Source:MGI Symbol;Acc:MGI:96965]	2	128540876	128644814	1
chr15_34549493_34550836	3.52169	2.42167	185.553	2.97218e-42	3.81703e-40	chr15 34549493 34550836	0.680669	0.705465	0.765034	1.39023	11.7429	9.00615	11.9282	12	13	16	59	517	351	212	51044	chr15	34549494	34550836	+	Intergenic	Intergenic	18451	ENSMUST00000122658.1	ENSMUST00000122658	ENSMUST00000122658	ENSMUSG00000084607	Gm22208	predicted gene, 22208 [Source:MGI Symbol;Acc:MGI:5451985]	15	34531860	34531969	1
chr1_65154615_65155414	2.84231	2.51512	185.518	3.02461e-42	3.87982e-40	chr1 65154615 65155414	1.87184	1.68226	1.43444	1.22529	10.6526	10.7509	11.2531	33	31	30	52	469	419	200	3177	chr1	65154616	65155414	+	Intergenic	Intergenic	20549	ENSMUST00000149310.7	ENSMUST00000149310	ENSMUST00000149310	ENSMUSG00000025950	Idh1	isocitrate dehydrogenase 1 (NADP+), soluble [Source:MGI Symbol;Acc:MGI:96413]	1	65197775	65225659	-1
chr14_45403701_45404273	4.93868	1.49238	185.5	3.05258e-42	3.91111e-40	chr14 45403701 45404273	0.0567224	0.1628	0.525961	0.0706896	6.01908	5.36264	6.30171	1	3	11	3	265	209	112	45312	chr14	45403702	45404273	+	TTS (ENSMUST00000179366.1)	#NAME?	898	ENSMUST00000228304.1	ENSMUST00000228304	ENSMUST00000228304	ENSMUSG00000037722	Gnpnat1	glucosamine-phosphate N-acetyltransferase 1 [Source:MGI Symbol;Acc:MGI:1858963]	14	45613791	45642370	-1
chr10_10702220_10702780	4.10061	1.39045	185.431	3.15987e-42	4.04386e-40	chr10 10702220 10702780	0.283612	0.217066	0.478146	0.259195	5.47395	5.15737	5.23267	5	4	10	11	241	201	93	11573	chr10	10702221	10702780	+	intron (ENSMUST00000105561.8, intron 8 of 9)	-intron (ENSMUST00000044306.12, intron 8 of 8)	16751	ENSMUST00000155772.1	ENSMUST00000155772	ENSMUST00000155772	ENSMUSG00000019828	Grm1	glutamate receptor, metabotropic 1 [Source:MGI Symbol;Acc:MGI:1351338]	10	10561803	10958100	-1
chr13_30224771_30225240	4.4942	1.37823	185.403	3.2056e-42	4.0976e-40	chr13 30224771 30225240	0.170167	0.217066	0.0956292	0.353448	4.74712	6.02976	5.28894	3	4	2	15	209	235	94	37157	chr13	30224772	30225240	+	TTS (ENSMUST00000220870.1)	#NAME?	-6847	ENSMUST00000222095.1	ENSMUST00000222095	ENSMUST00000222095	ENSMUSG00000038732	Mboat1	membrane bound O-acyltransferase domain containing 1 [Source:MGI Symbol;Acc:MGI:2387184]	13	30320472	30430700	1
chr4_66482370_66483080	4.08494	1.56801	185.391	3.22369e-42	4.11593e-40	chr4 66482370 66483080	0.283612	0.1628	0.382517	0.471264	6.9049	5.46527	5.68279	5	3	8	20	304	213	101	101460	chr4	66482371	66483080	+	Intergenic	Intergenic	-61336	ENSMUST00000083217.1	ENSMUST00000083217	ENSMUST00000083217	ENSMUSG00000065151	Gm25480	predicted gene, 25480 [Source:MGI Symbol;Acc:MGI:5455257]	4	66462298	66462430	1
chr14_57082882_57083384	4.81896	1.37701	185.322	3.33875e-42	4.25787e-40	chr14 57082882 57083384	0.22689	0.271333	0.191258	0.117816	6.58691	4.46459	4.95134	4	5	4	5	290	174	88	46081	chr14	57082883	57083384	+	Intergenic	Intergenic	21569	ENSMUST00000055698.7	ENSMUST00000055698	ENSMUST00000055698	ENSMUSG00000046352	Gjb2	gap junction protein, beta 2 [Source:MGI Symbol;Acc:MGI:95720]	14	57336057	57342159	-1
chr3_27290881_27291855	3.34287	2.07151	185.19	3.56641e-42	4.54293e-40	chr3 27290881 27291855	0.680669	1.1396	0.478146	0.918965	7.99515	8.74956	8.15846	12	21	10	39	352	341	145	90426	chr3	27290882	27291855	+	Intergenic	Intergenic	13308	ENSMUST00000193346.1	ENSMUST00000193346	ENSMUST00000193346	ENSMUSG00000102186	Gm37191	predicted gene, 37191 [Source:MGI Symbol;Acc:MGI:5610419]	3	27332209	27332596	1
chr11_36926924_36927672	2.97733	2.34989	185.156	3.62842e-42	4.61655e-40	chr11 36926924 36927672	1.41806	0.813998	1.24318	1.41379	9.7668	10.2891	9.3963	25	15	26	60	430	401	167	21560	chr11	36926925	36927672	+	intron (ENSMUST00000163524.7, intron 1 of 28)	-intron (ENSMUST00000057207.5, intron 1 of 28)	16868	ENSMUST00000057207.5	ENSMUST00000057207	ENSMUST00000057207	ENSMUSG00000049336	Tenm2	teneurin transmembrane protein 2 [Source:MGI Symbol;Acc:MGI:1345184]	11	35897483	37126791	-1
chr15_100908688_100909376	4.43527	1.5649	185.025	3.87547e-42	4.92518e-40	chr15 100908688 100909376	0.22689	0.379866	0.0956292	0.353448	6.38249	7.00478	4.67002	4	7	2	15	281	273	83	55807	chr15	100908689	100909376	+	intron (ENSMUST00000201484.3, intron 2 of 2)	-intron (ENSMUST00000082209.12, intron 1 of 26)	-24397	ENSMUST00000096198.9	ENSMUST00000096198	ENSMUST00000096198	ENSMUSG00000023033	Scn8a	sodium channel, voltage-gated, type VIII, alpha [Source:MGI Symbol;Acc:MGI:103169]	15	100767739	100943819	1
chr2_124326530_124327160	3.19852	2.53342	184.859	4.21246e-42	5.34724e-40	chr2 124326530 124327160	1.41806	0.922531	0.812849	1.64943	11.3795	12.547	10.2965	25	17	17	70	501	489	183	85114	chr2	124326531	124327160	+	intron (ENSMUST00000151199.1, intron 2 of 4)	-intron (ENSMUST00000103241.7, intron 3 of 20)	-104514	ENSMUST00000136658.1	ENSMUST00000136658	ENSMUST00000136658	ENSMUSG00000086954	4930583P06Rik	RIKEN cDNA 4930583P06 gene [Source:MGI Symbol;Acc:MGI:1923196]	2	124059599	124064251	-1
chr1_172524434_172524709	4.61161	1.39421	184.821	4.29334e-42	5.44361e-40	chr1 172524434 172524709	0.22689	0.108533	0.191258	0.282759	4.97426	6.59425	4.55749	4	2	4	12	219	257	81	9394	chr1	172524435	172524709	+	TTS (ENSMUST00000194051.1)	#NAME?	-1477	ENSMUST00000159792.7	ENSMUST00000159792	ENSMUST00000159792	ENSMUSG00000026546	Cfap45	cilia and flagella associated protein 45 [Source:MGI Symbol;Acc:MGI:1919120]	1	172348368	172373437	1
chr10_69908281_69908781	3.71757	1.78631	184.637	4.7094e-42	5.96424e-40	chr10 69908281 69908781	0.510502	0.705465	0.191258	0.636207	7.13204	6.56859	7.14569	9	13	4	27	314	256	127	15155	chr10	69908282	69908781	+	intron (ENSMUST00000218680.1, intron 24 of 42)	-intron (ENSMUST00000047061.12, intron 1 of 16)	-6334	ENSMUST00000182239.7	ENSMUST00000182239	ENSMUST00000182239	ENSMUSG00000069601	Ank3	ankyrin 3, epithelial [Source:MGI Symbol;Acc:MGI:88026]	10	69234603	69863268	1
chr6_16459939_16460476	3.83314	1.54533	184.594	4.81209e-42	6.08726e-40	chr6 16459939 16460476	0.22689	0.434132	0.478146	0.447701	5.7238	5.46527	6.52677	4	8	10	19	252	213	116	118205	chr6	16459940	16460476	+	intron (ENSMUST00000203761.2, intron 4 of 4)	-intron (ENSMUST00000203761.2, intron 4 of 4)	9696	ENSMUST00000203052.1	ENSMUST00000203052	ENSMUST00000203052	ENSMUSG00000108295	Gm36406	predicted gene, 36406 [Source:MGI Symbol;Acc:MGI:5595565]	6	16457389	16469949	-1
chr7_68593425_68594172	3.19406	2.87255	184.589	4.82631e-42	6.09822e-40	chr7 68593425 68594172	1.24789	1.24813	1.19537	2.37988	14.1959	13.8813	15.8105	22	23	25	101	625	541	281	129740	chr7	68593426	68594172	+	Intergenic	Intergenic	5055	ENSMUST00000208980.1	ENSMUST00000208980	ENSMUST00000208980	ENSMUSG00000109375	Gm44887	predicted gene 44887 [Source:MGI Symbol;Acc:MGI:5753463]	7	68248425	68248602	-1
chr9_116206191_116206794	3.62421	2.18516	184.521	4.99311e-42	6.30172e-40	chr9 116206191 116206794	0.170167	0.868264	0.956292	0.871839	8.42671	9.05747	10.2965	3	16	20	37	371	353	183	150124	chr9	116206192	116206794	+	Intergenic	Intergenic	7196	ENSMUST00000214749.1	ENSMUST00000214749	ENSMUST00000214749	ENSMUSG00000111729	Gm48038	predicted gene, 48038 [Source:MGI Symbol;Acc:MGI:6097354]	9	116027033	116029680	1
chr8_122173918_122174929	3.12592	3.27186	184.492	5.06735e-42	6.38807e-40	chr8 122173918 122174929	2.21217	2.22493	2.10384	2.19138	24.4852	19.7571	12.716	39	41	44	93	1078	770	226	141968	chr8	122173919	122174929	+	intron (ENSMUST00000127664.1, intron 1 of 15)	-intron (ENSMUST00000127664.1, intron 1 of 15)	-84196	ENSMUST00000187142.2	ENSMUST00000187142	ENSMUST00000187142	ENSMUSG00000043903	Zfp469	zinc finger protein 469 [Source:MGI Symbol;Acc:MGI:2684868]	8	122985359	122999389	1
chr19_57374950_57376140	3.13485	2.40682	184.44	5.20056e-42	6.54847e-40	chr19 57374950 57376140	0.964281	1.03106	1.6257	1.08391	11.4022	10.7766	8.72112	17	19	34	46	502	420	155	77403	chr19	57374951	57376140	+	intron (ENSMUST00000237170.1, intron 5 of 14)	-intron (ENSMUST00000036407.5, intron 5 of 16)	14515	ENSMUST00000237170.1	ENSMUST00000237170	ENSMUST00000237170	ENSMUSG00000033478	Fhip2a	FHF complex subunit HOOK interacting protein 2A [Source:MGI Symbol;Acc:MGI:2147545]	19	57349112	57378018	1
chr15_100323947_100324550	4.24312	2.16367	184.333	5.4871e-42	6.90135e-40	chr15 100323947 100324550	0.453779	0.705465	0.573775	0.306322	10.6299	10.8279	6.02038	8	13	12	13	468	422	107	55742	chr15	100323948	100324550	+	intron (ENSMUST00000229588.1, intron 1 of 1)	-intron (ENSMUST00000229588.1, intron 1 of 1)	-10680	ENSMUST00000075420.5	ENSMUST00000075420	ENSMUST00000075420	ENSMUSG00000058057	Tmt1a3	thiol methyltransferase 1A3 [Source:MGI Symbol;Acc:MGI:3710670]	15	100232810	100238256	1
chr18_21810769_21811661	2.54298	3.42335	184.315	5.53752e-42	6.95678e-40	chr18 21810769 21811661	2.43906	3.31026	3.49047	4.26494	19.579	19.8597	20.8744	43	61	73	181	862	774	371	68981	chr18	21810770	21811661	+	TTS (ENSMUST00000115837.2)	#NAME?	-156497	ENSMUST00000122333.1	ENSMUST00000122333	ENSMUST00000122333	ENSMUSG00000042514	Klhl14	kelch-like 14 [Source:MGI Symbol;Acc:MGI:1921249]	18	21683434	21787775	-1
chr5_89477307_89477926	3.94104	1.50372	183.484	8.40972e-42	1.0553e-39	chr5 89477307 89477926	0.567224	0.1628	0.286888	0.424138	5.74652	5.67054	5.73906	10	3	6	18	253	221	102	112405	chr5	89477308	89477926	+	Intergenic	Intergenic	-19719	ENSMUST00000049209.12	ENSMUST00000049209	ENSMUST00000049209	ENSMUSG00000035540	Gc	vitamin D binding protein [Source:MGI Symbol;Acc:MGI:95669]	5	89565381	89605757	-1
chr16_20775712_20776436	4.62934	1.2562	183.39	8.81539e-42	1.10495e-39	chr16 20775712 20776436	0.283612	0.108533	0.239073	0.164943	4.65627	5.67054	4.2199	5	2	5	7	205	221	75	57354	chr16	20775713	20776436	+	Intergenic	Intergenic	21699	ENSMUST00000232027.1	ENSMUST00000232027	ENSMUST00000232027	ENSMUSG00000116776	Gm46544	predicted gene, 46544 [Source:MGI Symbol;Acc:MGI:5826181]	16	20615977	20616523	-1
chr16_73012749_73013375	4.19124	1.66636	183.388	8.82654e-42	1.10508e-39	chr16 73012749 73013375	0.170167	0.434132	0.0956292	0.565517	6.40521	6.72254	6.47051	3	8	2	24	282	262	115	60348	chr16	73012750	73013375	+	exon (ENSMUST00000023600.7, exon 24 of 29)	-exon (ENSMUST00000023600.7, exon 24 of 29)	6641	ENSMUST00000232432.1	ENSMUST00000232432	ENSMUST00000232432	ENSMUSG00000022883	Robo1	roundabout guidance receptor 1 [Source:MGI Symbol;Acc:MGI:1274781]	16	72105194	72842983	1
chr12_71002750_71004172	2.96445	2.58541	183.257	9.4268e-42	1.17754e-39	chr12 71002750 71004172	1.53151	1.7908	1.29099	1.36667	12.7877	12.4187	9.28377	27	33	27	58	563	484	165	32073	chr12	71002751	71004172	+	intron (ENSMUST00000127129.7, intron 3 of 3)	-intron (ENSMUST00000127129.7, intron 3 of 3)	12134	ENSMUST00000222159.1	ENSMUST00000222159	ENSMUST00000222159	ENSMUSG00000085622	3110056K07Rik	RIKEN cDNA 3110056K07 gene [Source:MGI Symbol;Acc:MGI:1920454]	12	71038389	71062606	-1
chr19_10235282_10236645	2.34967	4.04953	183.259	9.41801e-42	1.17754e-39	chr19 10235282 10236645	5.95585	6.83758	6.26372	4.87759	32.2759	33.2022	25.038	105	126	131	207	1421	1294	445	73998	chr19	10235283	10236645	+	intron (ENSMUST00000190922.6, intron 1 of 24)	-intron (ENSMUST00000088013.11, intron 1 of 26)	4640	ENSMUST00000189897.1	ENSMUST00000189897	ENSMUST00000189897	ENSMUSG00000036098	Myrf	myelin regulatory factor [Source:MGI Symbol;Acc:MGI:2684944]	19	10185636	10218112	-1
chr5_76747770_76748271	4.28913	1.38884	183.205	9.67486e-42	1.20716e-39	chr5 76747770 76748271	0.340335	0.108533	0.334702	0.282759	5.01968	4.90078	6.30171	6	2	7	12	221	191	112	111959	chr5	76747771	76748271	+	intron (ENSMUST00000238963.1, intron 1 of 11)	-intron (ENSMUST00000125922.7, intron 1 of 4)	-4347	ENSMUST00000121160.7	ENSMUST00000121160	ENSMUST00000121160	ENSMUSG00000036377	Cracd	capping protein inhibiting regulator of actin [Source:MGI Symbol;Acc:MGI:2444817]	5	76804359	77021392	1
chr12_104366286_104366962	4.15001	1.44708	183.018	1.06271e-41	1.32447e-39	chr12 104366286 104366962	0.510502	0.271333	0.239073	0.259195	6.15536	5.33698	4.95134	9	5	5	11	271	208	88	34444	chr12	104366287	104366962	+	intron (ENSMUST00000101078.11, intron 1 of 4)	-intron (ENSMUST00000101078.11, intron 1 of 4)	8621	ENSMUST00000163975.1	ENSMUST00000163975	ENSMUST00000163975	ENSMUSG00000091157	Serpina3l-ps	serine (or cysteine) peptidase inhibitor, clade A, member 3L, pseudogene [Source:MGI Symbol;Acc:MGI:2182857]	12	104324262	104329793	1
chr18_66286569_66287718	2.24471	3.44688	182.813	1.178e-41	1.46649e-39	chr18 66286569 66287718	3.8004	4.50412	4.11206	4.07644	20.5784	18.0636	20.0304	67	83	86	173	906	704	356	71996	chr18	66286570	66287718	+	intron (ENSMUST00000151343.2, intron 3 of 3)	-intron (ENSMUST00000061103.13, intron 2 of 11)	-4130	ENSMUST00000153479.1	ENSMUST00000153479	ENSMUST00000153479	ENSMUSG00000085055	Gm15958	predicted gene 15958 [Source:MGI Symbol;Acc:MGI:3801839]	18	66424345	66452716	1
chr16_92493405_92494451	3.28813	2.41605	182.745	1.21953e-41	1.51647e-39	chr16 92493405 92494451	1.19117	1.35666	1.29099	0.65977	11.016	11.0075	9.45257	21	25	27	28	485	429	168	61324	chr16	92493406	92494451	+	intron (ENSMUST00000160494.2, intron 2 of 2)	-intron (ENSMUST00000160494.2, intron 2 of 2)	-4206	ENSMUST00000023670.3	ENSMUST00000023670	ENSMUST00000023670	ENSMUSG00000022949	Clic6	chloride intracellular channel 6 [Source:MGI Symbol;Acc:MGI:2146607]	16	92282624	92338131	1
chr19_20388037_20388581	3.8077	1.47286	182.626	1.29474e-41	1.60816e-39	chr19 20388037 20388581	0.510502	0.271333	0.382517	0.400575	5.74652	5.36264	5.514	9	5	8	17	253	209	98	74506	chr19	20388038	20388581	+	intron (ENSMUST00000171423.8, intron 1 of 13)	-intron (ENSMUST00000025561.7, intron 1 of 12)	2342	ENSMUST00000164587.1	ENSMUST00000164587	ENSMUST00000164587	ENSMUSG00000024659	Anxa1	annexin A1 [Source:MGI Symbol;Acc:MGI:96819]	19	20350792	20368308	-1
chr8_71665425_71666017	2.73967	3.40269	182.612	1.30326e-41	1.61691e-39	chr8 71665425 71666017	2.21217	2.87613	3.9208	3.01609	20.056	23.6059	16.7671	39	53	82	128	883	920	298	138543	chr8	71665426	71666017	+	intron (ENSMUST00000177517.7, intron 3 of 44)	-intron (ENSMUST00000030170.14, intron 3 of 43)	2361	ENSMUST00000175780.1	ENSMUST00000175780	ENSMUST00000175780	ENSMUSG00000034799	Unc13a	unc-13 homolog A [Source:MGI Symbol;Acc:MGI:3051532]	8	72077061	72124401	-1
chr5_83899308_83899883	4.1666	1.8835	182.376	1.46792e-41	1.81915e-39	chr5 83899308 83899883	0.340335	0.434132	0.382517	0.494828	5.86008	7.03044	10.4653	6	8	8	21	258	274	186	112187	chr5	83899309	83899883	+	Intergenic	Intergenic	36433	ENSMUST00000197408.1	ENSMUST00000197408	ENSMUST00000197408	ENSMUSG00000106576	Gm4866	predicted gene 4866 [Source:MGI Symbol;Acc:MGI:3646530]	5	84011021	84011609	1
chr8_23566653_23567323	4.78726	1.85165	182.14	1.65267e-41	2.04578e-39	chr8 23566653 23567323	0.22689	0.217066	0.0956292	0.447701	7.17747	5.64488	10.5779	4	4	2	19	316	220	188	135975	chr8	23566654	23567323	+	Intergenic	Intergenic	-69031	ENSMUST00000131410.7	ENSMUST00000131410	ENSMUST00000131410	ENSMUSG00000037492	Zmat4	zinc finger, matrin type 4 [Source:MGI Symbol;Acc:MGI:2443497]	8	24126035	24646601	1
chr19_10809107_10810023	3.68654	1.54752	182.134	1.65757e-41	2.04953e-39	chr19 10809107 10810023	0.340335	0.488399	0.430332	0.494828	5.3831	6.10673	6.02038	6	9	9	21	237	238	107	74082	chr19	10809108	10810023	+	intron (ENSMUST00000174176.2, intron 1 of 5)	-intron (ENSMUST00000039043.14, intron 1 of 11)	-10821	ENSMUST00000025572.7	ENSMUST00000025572	ENSMUST00000025572	ENSMUSG00000024670	Cd6	CD6 antigen [Source:MGI Symbol;Acc:MGI:103566]	19	10766705	10807422	-1
chr2_104145917_104146376	3.22545	1.96973	181.857	1.90523e-41	2.35311e-39	chr2 104145917 104146376	0.680669	0.868264	0.717219	0.918965	8.35857	7.64625	6.8081	12	16	15	39	368	298	121	83899	chr2	104145918	104146376	+	exon (ENSMUST00000089726.9, exon 21 of 21)	-exon (ENSMUST00000089726.9, exon 21 of 21)	12272	ENSMUST00000155458.1	ENSMUST00000155458	ENSMUST00000155458	ENSMUSG00000068373	D430041D05Rik	RIKEN cDNA D430041D05 gene [Source:MGI Symbol;Acc:MGI:2181743]	2	103973418	104241358	-1
chr9_57574957_57575754	3.66659	1.86482	181.802	1.95916e-41	2.417e-39	chr9 57574957 57575754	0.623947	0.868264	0.62159	0.329885	7.60902	7.00478	7.20196	11	16	13	14	335	273	128	145835	chr9	57574958	57575754	+	intron (ENSMUST00000215942.1, intron 1 of 2)	-intron (ENSMUST00000045791.10, intron 1 of 8)	-6494	ENSMUST00000217200.1	ENSMUST00000217200	ENSMUST00000217200	ENSMUSG00000040188	Scamp2	secretory carrier membrane protein 2 [Source:MGI Symbol;Acc:MGI:1346518]	9	57468226	57496078	1
chr11_57943151_57944251	3.8584	1.87436	181.671	2.09193e-41	2.5779e-39	chr11 57943151 57944251	0.850836	0.325599	0.382517	0.494828	8.5857	7.59493	5.85159	15	6	8	21	378	296	104	22705	chr11	57943152	57944251	+	Intergenic	Intergenic	5384	ENSMUST00000117266.1	ENSMUST00000117266	ENSMUST00000117266	ENSMUSG00000083657	Gm12245	predicted gene 12245 [Source:MGI Symbol;Acc:MGI:3649494]	11	57839555	57839911	-1
chr3_53983487_53984113	4.50845	1.12374	181.627	2.13905e-41	2.633e-39	chr3 53983487 53984113	0.22689	0.108533	0.191258	0.212069	4.65627	4.49024	4.0511	4	2	4	9	205	175	72	91897	chr3	53983488	53984113	+	Intergenic	Intergenic	-37364	ENSMUST00000194076.1	ENSMUST00000194076	ENSMUST00000194076	ENSMUSG00000103155	Gm8109	predicted gene 8109 [Source:MGI Symbol;Acc:MGI:3645533]	3	53928585	53929330	1
chr15_86195506_86195926	4.65225	1.59083	181.617	2.14924e-41	2.64258e-39	chr15 86195506 86195926	0.397057	0.108533	0.239073	0.235632	6.49606	7.59493	4.33243	7	2	5	10	286	296	77	54552	chr15	86195507	86195926	+	Intergenic	Intergenic	-9575	ENSMUST00000044332.15	ENSMUST00000044332	ENSMUST00000044332	ENSMUSG00000035891	Cerk	ceramide kinase [Source:MGI Symbol;Acc:MGI:2386052]	15	86023329	86070342	-1
chr8_107278492_107279085	3.5886	2.15954	181.539	2.23605e-41	2.74624e-39	chr8 107278492 107279085	0.737391	0.542665	0.669405	0.918965	11.3567	7.90283	7.53955	13	10	14	39	500	308	134	140791	chr8	107278493	107279085	+	Intergenic	Intergenic	-14681	ENSMUST00000169453.7	ENSMUST00000169453	ENSMUST00000169453	ENSMUSG00000003847	Nfat5	nuclear factor of activated T cells 5 [Source:MGI Symbol;Acc:MGI:1859333]	8	108020102	108106149	1
chr2_4137495_4138047	3.65121	2.02766	181.445	2.34337e-41	2.87482e-39	chr2 4137495 4138047	0.850836	0.542665	0.765034	0.518391	9.5851	6.44029	8.60859	15	10	16	22	422	251	153	77804	chr2	4137496	4138047	+	promoter-TSS (ENSMUST00000138462.1)	#NAME?	-3	ENSMUST00000138462.1	ENSMUST00000138462	ENSMUST00000138462	ENSMUSG00000086921	Gm13189	predicted gene 13189 [Source:MGI Symbol;Acc:MGI:3650860]	2	4142585	4148913	1
chr17_73031837_73032758	2.63589	2.762	181.344	2.46585e-41	3.0217e-39	chr17 73031837 73032758	2.04201	2.17066	2.39073	1.67299	12.9467	12.8549	12.1533	36	40	50	71	570	501	216	66596	chr17	73031838	73032758	+	Intergenic	Intergenic	-3220	ENSMUST00000233236.1	ENSMUST00000233236	ENSMUST00000233236	ENSMUSG00000117096	Gm30420	predicted gene, 30420 [Source:MGI Symbol;Acc:MGI:5589579]	17	73327947	73336073	-1
chr3_122428143_122428798	4.01151	1.5302	181.339	2.47266e-41	3.02667e-39	chr3 122428143 122428798	0.340335	0.379866	0.430332	0.306322	5.99636	6.56859	4.72628	6	7	9	13	264	256	84	96028	chr3	122428144	122428798	+	intron (ENSMUST00000197198.1, intron 1 of 1)	-intron (ENSMUST00000029766.8, intron 2 of 11)	8648	ENSMUST00000197590.1	ENSMUST00000197590	ENSMUST00000197590	ENSMUSG00000028121	Bcar3	breast cancer anti-estrogen resistance 3 [Source:MGI Symbol;Acc:MGI:1352501]	3	122087785	122323840	1
chr2_170695735_170696445	3.43794	2.26346	181.336	2.47558e-41	3.02686e-39	chr2 170695735 170696445	0.453779	1.08533	0.908478	0.989655	10.2665	10.7766	7.48328	8	20	19	42	452	420	133	88970	chr2	170695736	170696445	+	Intergenic	Intergenic	-33625	ENSMUST00000147141.1	ENSMUST00000147141	ENSMUST00000147141	ENSMUSG00000085158	Gm14264	predicted gene 14264 [Source:MGI Symbol;Acc:MGI:3649394]	2	170494354	170504385	-1
chr8_12439036_12439566	4.17878	1.67223	181.284	2.54085e-41	3.1032e-39	chr8 12439036 12439566	0.510502	0.379866	0.191258	0.353448	7.5636	6.85083	4.83881	9	7	4	15	333	267	86	135492	chr8	12439037	12439566	+	Intergenic	Intergenic	27663	ENSMUST00000209741.1	ENSMUST00000209741	ENSMUST00000209741	ENSMUSG00000109921	Gm33326	predicted gene, 33326 [Source:MGI Symbol;Acc:MGI:5592485]	8	12511419	12516965	-1
chr8_109280415_109281012	4.19432	1.66376	181.277	2.54987e-41	3.11075e-39	chr8 109280415 109281012	0.283612	0.271333	0.669405	0.235632	7.10933	5.43961	6.97689	5	5	14	10	313	212	124	140912	chr8	109280416	109281012	+	Intergenic	Intergenic	30848	ENSMUST00000181098.1	ENSMUST00000181098	ENSMUST00000181098	ENSMUSG00000097393	D030068K23Rik	RIKEN cDNA D030068K23 gene [Source:MGI Symbol;Acc:MGI:3037424]	8	109801854	110000443	1
chr14_25500415_25500996	3.273	1.83473	181.126	2.75171e-41	3.35327e-39	chr14 25500415 25500996	0.737391	0.813998	0.765034	0.612644	7.15475	6.51727	7.20196	13	15	16	26	315	254	128	44266	chr14	25500416	25500996	+	intron (ENSMUST00000162645.7, intron 1 of 23)	-intron (ENSMUST00000007961.14, intron 1 of 23)	-1949	ENSMUST00000160680.2	ENSMUST00000160680	ENSMUST00000160680	ENSMUSG00000007817	Zmiz1	zinc finger, MIZ-type containing 1 [Source:MGI Symbol;Acc:MGI:3040693]	14	25459609	25667167	1
chr1_169051450_169052357	2.74085	2.91321	181.012	2.91432e-41	3.54748e-39	chr1 169051450 169052357	1.41806	2.17066	2.10384	2.66264	13.9007	13.83	15.4167	25	40	44	113	612	539	274	9077	chr1	169051451	169052357	+	Intergenic	Intergenic	-32815	ENSMUST00000184979.1	ENSMUST00000184979	ENSMUST00000184979	ENSMUSG00000098829	Mir6354	microRNA 6354 [Source:MGI Symbol;Acc:MGI:5530664]	1	168846543	168846658	-1
chr19_5225830_5226424	3.74936	1.80665	180.93	3.03642e-41	3.69201e-39	chr19 5225830 5226424	0.567224	0.813998	0.239073	0.494828	7.88158	6.87649	6.18918	10	15	5	21	347	268	110	73642	chr19	5225831	5226424	+	intron (ENSMUST00000237463.1, intron 2 of 4)	-intron (ENSMUST00000025786.8, intron 1 of 23)	-24824	ENSMUST00000183577.1	ENSMUST00000183577	ENSMUST00000183577	NA	NA	NA	NA	NA	NA	NA
chr10_77526146_77526838	4.47633	1.31932	180.927	3.04154e-41	3.69414e-39	chr10 77526146 77526838	0.340335	0.108533	0.286888	0.188506	5.74652	5.13171	4.2199	6	2	6	8	253	200	75	15768	chr10	77526147	77526838	+	Intergenic	Intergenic	-3760	ENSMUST00000000299.13	ENSMUST00000000299	ENSMUST00000000299	ENSMUSG00000000290	Itgb2	integrin beta 2 [Source:MGI Symbol;Acc:MGI:96611]	10	77366086	77401542	1
chr17_84126981_84127698	3.82508	1.81934	180.878	3.11722e-41	3.78187e-39	chr17 84126981 84127698	0.567224	0.651198	0.478146	0.377011	7.29103	8.28771	5.514	10	12	10	16	321	323	98	67338	chr17	84126982	84127698	+	Intergenic	Intergenic	8620	ENSMUST00000234322.1	ENSMUST00000234322	ENSMUST00000234322	ENSMUSG00000117485	Gm19696	predicted gene, 19696 [Source:MGI Symbol;Acc:MGI:5011881]	17	84441432	84463868	-1
[truncated: 60,384 more rows]

## Sheet: DAC distribution
	Distribution of DAC regions
Intron	29172
Exon	2948
TTS	2724
Promoter	6642
Intergenic	19768

## Sheet: FDR<0.05 promoter
	logFC	logCPM	LR	PValue	FDR	mgi_symbol	bedID	Mi2.control.1_S7_L001_cpm	Mi2.control.2_S8_L001_cpm	Mi2.control.3_S9_L001_cpm	Mi2.control_4_cpm	Chd3-4Db_1_S1_cpm	Chd3-4Db_2_S3_cpm	Chd3-4Db_3_L007_cpm	Mi2.control.1_S7_L001_cpm	Mi2.control.2_S8_L001_cpm	Mi2.control.3_S9_L001_cpm	Mi2.control_4_cpm	Chd3-4Db_1_S1_cpm	Chd3-4Db_2_S3_cpm	Chd3-4Db_3_L007_cpm	PeakID	Chr	Start	End	Strand	Annotation	Detailed.Annotation	Distance.to.TSS	Nearest.PromoterID	Entrez.ID	Nearest.Unigene	ensembl_gene_id	mgi_symbol	description	NearestGene.chromosome_name	NearestGene.start_position	NearestGene.end_position	NearestGene.strand
[truncated: 6,643 more rows]

[truncated: 5 more sheets: FDR<0.05 exon, FDR<0.05 Intergenic, FDR<0.05 intron, FDR<0.05 TTS, Overlap DAC with DEGs]
