# Supplementary material for: CHD3 and CHD4 coordinate gene expression programs to maintain β-cell function and identity in vivo
Source: Research Square preprint supplement (doi:10.21203/rs.3.rs-7880472/v1), 2025-11-07
Supplement: Supplementary file 4 [file f48e30eac20bb4118dee53d4.xlsx]

## Sheet: Sheet1
	Source	Islet Research Resource ID (RRID)	Age	Sex	BMI	Race	HbA1c	COD	Institution	Islet Type	Experimental use
	IIDP	SAMN44073850	39 Years	Male	27.1	White	0.053	Head Trauma	University of Arizona	Non-Diabetic	GSIS
	ADI:R574	SAMN46867249	45 Years	Male	25.3		0.053		Albert Diabetes Institute	Non-Diabetic	GSIS
	IIDP	SAMN47834917	39 Years	Male	22.9	White	0.057	Anoxia	University of Pennsylvania	Non-Diabetic	GSIS, RNASeq
	ADI: R583	SAMN48439620	33 Years	Male	23.1		0.057		Albert Diabetes Institute	Non-Diabetic	GSIS, RNASeq
	ADI: R589	SAMN49540983	55 years	Male	24.2		5,40%		Albert Diabetes Institute	Non-Diabetic	GSIS, RNASeq
